# Supplementary material
Source: PubMed Central journal article supplement (PMC7733736)

## Supporting Information

### **Divergent Synthesis of Monosubstituted and Unsymmetrical 3,6-Disubstituted Tetrazines from Carboxylic Ester Precursors**

Yixin Xie,<sup>[a]</sup> Yinzhi Fang,<sup>[a]</sup> Zhen Huang,<sup>[c]</sup> Amanda M. Tallon,<sup>[a]</sup> Christopher W. am Ende,<sup>\*[b]</sup> and Joseph M. Fox<sup>\*[a]</sup>

## Table of Contents

|     |                                                                                                                  |          |
|-----|------------------------------------------------------------------------------------------------------------------|----------|
| 1.  | General Consideration.....                                                                                       | S2       |
| 2.  | Optimization.....                                                                                                | S3-S4    |
| 3.  | Stability of Tetrazines.....                                                                                     | S5-S6    |
| 4.  | Stopped-Flow Kinetics of Tetrazines <b>5b</b> , <b>6c</b> , <b>5l</b> , <b>6a</b> and <b>4f</b> .....            | S6-S11   |
| 5.  | Differential Scanning Calorimetry (DSC) and Synthesis of Methyl Thiocarbonylhydrazide Iodide Salt <b>2</b> ..... | S12      |
| 6.  | Synthesis of Oxetane Esters <b>1</b> .....                                                                       | S13-S20  |
| 7.  | Synthesis of Thiomethyltetrazines <b>3</b> .....                                                                 | S21-S28  |
| 8.  | Synthesis of 3-Monosubstituted Tetrazines <b>4</b> .....                                                         | S29-S32  |
| 9.  | Synthesis of Unsymmetrical Tetrazines <b>5</b> via Ag-mediated Pd-catalyzed Liebeskind Coupling .....            | S33-S36  |
| 10. | Synthesis of Vinyl ether- Substituted Tetrazines <b>6</b> via Cu-mediated Liebeskind Coupling .....              | S37-S41  |
| 11. | Synthesis of MAGL Tetrazine Probes .....                                                                         | S42-S44  |
| 12. | Stopped-Flow Kinetics of MAGL Tetrazines Probes .....                                                            | S45      |
| 13. | MAGL Probe Experiment .....                                                                                      | S46-S48  |
| 14. | References .....                                                                                                 | S48      |
| 15. | NMR Spectrum .....                                                                                               | S49-S230 |

## General Considerations Experimental Procedures

All reactions were conducted in flame dried round-bottom flasks. All reactions using microwave heating was conducted in 5 mL microwave reaction tubes. All optimization reactions were conducted in 4 mL sealed vials. Silica gel chromatography was performed on Silicycle Siliaflash irregular P60 silica gel (40-63  $\mu\text{m}$ , 60  $\text{\AA}$ ) or on Yamazen reverse phase prepacked Universal Column C18-silica gel (40-60  $\mu\text{m}$ , 120  $\text{\AA}$ ). Automated column chromatography was performed on a Teledyne Isco Combiflash Rf. Commercially available chemicals were purchased from Sigma-Aldrich, Combi-Blocks, Acros Organics, Alfa Aesar and TCI Chemicals. Solvents were purchased from Thermo Fisher Chemical, Acros Organics and Millipore Sigma. Anhydrous dichloromethane was freshly prepared by an alumina column solvent purification system. Anhydrous tetrahydrofuran was freshly distilled from sodium/benzophenone. Deuterated solvents were purchased from Cambridge Isotope. A Bruker AV400 was used to record NMR spectra ( $^1\text{H}$ : 400 MHz,  $^{13}\text{C}$ : 101 MHz). Chemical shifts are reported in ppm. Multiplicities are reported as follow: singlet (s), doublet (d), triplet (t), quartet (q), pentet (pent), sextet (sext), heptet (hept), multiplet (m), 'broad' (br), and 'apparent' (app).  $^{13}\text{C}$  NMR resonances are proton decoupled and an APT pulse sequence was used to determine type of carbon as follows: quaternary and methylene (C or  $\text{CH}_2$ ) carbons appear 'up' and methine and methyl ( $\text{CH}$  or  $\text{CH}_3$ ) carbons appear 'down'. High resolution mass spectra were obtained using a Waters GCT Premier. Infrared spectra were taken on a Nicolet Magna IR 560 spectrometer. Stopped-flow kinetics were obtained using an Applied Photophysics Ltd. SX 18MV-R stopped-flow spectrophotometer.

## Optimization

**Table S1.** Optimization of synthesizing 3-monosubstituted tetrazines.

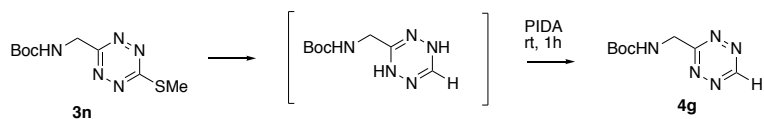

All reactions were conducted with 0.04 mmol scale of **3n** at concentration of 0.1 M THF (entry 9 is in 0.1 M toluene). Oxidation of dihydrotetrazine was accomplished by adding PIDA (1 equiv.) and stirring at room temperature for 1 h. Yield was calculated by NMR with benzyl benzoate as internal standard.

| Entry | Catalyst                                       | Reductant                     | Temperature | Time | Conversion (%) | NMR Yield (%) |
|-------|------------------------------------------------|-------------------------------|-------------|------|----------------|---------------|
| 1     | 5%wt Pd/C (10 mol%)                            | HSiEt <sub>3</sub> (4 equiv.) | r.t.        | 24 h | 3              | Trace         |
| 2     | 5%wt Pd/C (10 mol%)                            | hydrogen                      | r.t.        | 24 h | 3              | Trace         |
| 3     | 5%wt Pd/C (10 mol%)                            | HSiEt <sub>3</sub> (4 equiv.) | 70 °C       | 3 h  | 94             | 52            |
| 4     | PdCl <sub>2</sub> (10 mol%)                    | HSiEt <sub>3</sub> (4 equiv.) | 70 °C       | 3 h  | 97             | 69            |
| 5     | Pd(OAc) <sub>2</sub> (10 mol%)                 | HSiEt <sub>3</sub> (4 equiv.) | 70 °C       | 3 h  | 96             | 59            |
| 6     | PdCl <sub>2</sub> (ACN) <sub>2</sub> (10 mol%) | HSiEt <sub>3</sub> (4 equiv.) | 70 °C       | 3 h  | 95             | 61            |
| 7     | [PdCl(allyl)] <sub>2</sub> (10 mol%)           | HSiEt <sub>3</sub> (4 equiv.) | 70 °C       | 3 h  | 90             | 58            |
| 8     | Pd(acac) <sub>2</sub> (10 mol%)                | HSiEt <sub>3</sub> (4 equiv.) | 70 °C       | 3 h  | 86             | 49            |
| 9     | Ni(cod) <sub>2</sub> (10 mol%)                 | HSiEt <sub>3</sub> (4 equiv.) | 70 °C       | 2 h  | 2              | 0             |
| 10    | NiCl <sub>2</sub> (10 mol%)                    | HSiEt <sub>3</sub> (4 equiv.) | 70 °C       | 2 h  | 1              | 0             |
| 11    | PdCl <sub>2</sub> (10 mol%)                    | HSiEt <sub>3</sub> (6 equiv.) | 70 °C       | 3 h  | 100            | 51            |
| 12    | PdCl <sub>2</sub> (10 mol%)                    | HSiEt <sub>3</sub> (3 equiv.) | 70 °C       | 3 h  | 88             | 80            |
| 13    | PdCl <sub>2</sub> (10 mol%)                    | HSiEt <sub>3</sub> (3 equiv.) | 45 °C       | 20 h | 90             | 83            |
| 14    | PdCl <sub>2</sub> (10 mol%)                    | HSiEt <sub>3</sub> (3 equiv.) | 45 °C       | 30 h | 73             | 66            |
| 15    | PdCl <sub>2</sub> (10 mol%)                    | HSiEt <sub>3</sub> (3 equiv.) | r.t.        | 30 h | 61             | 57            |

**Table S1.** Optimization of synthesizing 3-monosubstituted tetrazines.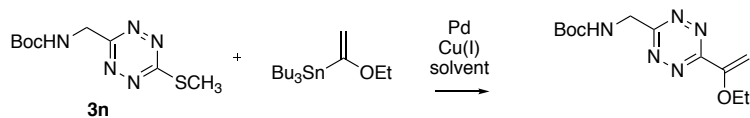

All reactions were conducted with 0.04 mmol scale of **3n** and 2 equiv. of  $\alpha$ -tributylstannyl ethylvinylether. Yields were calculated by NMR with benzyl benzoate as an internal standard. PIDA (1 equiv.) was added after reactions with  $\text{CuBr}\cdot\text{SMe}_2$  due to tetrazine reduction under these conditions.

| Entry | Catalyst                                                          | Cu                                          | Solvent (conc. of <b>3n</b> ) | Temperature | Time   | NMR yield (%) |
|-------|-------------------------------------------------------------------|---------------------------------------------|-------------------------------|-------------|--------|---------------|
| 1     | $\text{Pd}_2(\text{dba})_3$ (10 mol%)<br>$\text{PPh}_3$ (40 mol%) | CuTc (2 equiv.)                             | THF (0.1 M)                   | 70 °C       | 30 min | 10            |
| 2     | $\text{Pd}(\text{PPh}_3)_4$ (20 mol%)                             | CuTc (2 equiv.)                             | THF (0.1 M)                   | 70 °C       | 30 min | 16            |
| 3     | $\text{Pd}(\text{PPh}_3)_4\text{Cl}_2$ (20 mol%)                  | CuTc (2 equiv.)                             | THF (0.1 M)                   | 70 °C       | 30 min | 14            |
| 4     | $\text{Pd}(\text{dppf})\text{Cl}_2$ (20 mol%)                     | CuTc (2 equiv.)                             | THF (0.1 M)                   | 70 °C       | 30 min | 11            |
| 5     | $\text{Pd}(\text{OAc})_2$ (20 mol%)<br>$\text{PPh}_3$ (40 mol%)   | CuTc (2 equiv.)                             | THF (0.1 M)                   | 70 °C       | 30 min | 0             |
| 6     | $\text{Pd}(\text{PPh}_3)_4$ (20 mol%)                             | $\text{CuBr}\cdot\text{SMe}_2$ (2.2 equiv.) | dioxane (0.1 M)               | 50 °C       | 14 h   | 25            |
| 7     | $\text{Pd}(\text{PPh}_3)_4\text{Cl}_2$ (20 mol%)                  | $\text{CuBr}\cdot\text{SMe}_2$ (2.2 equiv.) | dioxane (0.1 M)               | 50 °C       | 14 h   | 24            |
| 8     | $\text{Pd}(\text{PPh}_3)_4$ (20 mol%)                             | $\text{CuBr}\cdot\text{SMe}_2$ (3 equiv.)   | THF (0.1 M)                   | 50 °C       | 14 h   | 24            |
| 9     | $\text{Pd}(\text{PPh}_3)_4$ (20 mol%)                             | $\text{CuBr}\cdot\text{SMe}_2$ (2.2 equiv.) | THF (0.1 M)                   | 50 °C       | 14 h   | 24            |
| 10    | $\text{Pd}(\text{PPh}_3)_4$ (20 mol%)                             | CuTc (2 equiv.)                             | THF (0.1 M)                   | 70 °C       | 3 min  | 30            |
| 11    | $\text{Pd}(\text{PPh}_3)_4$ (20 mol%)                             | CuTc (2 equiv.)                             | THF (0.1 M)                   | r.t.        | 1 h    | 17            |
| 12    | $\text{Pd}(\text{PPh}_3)_4$ (20 mol%)                             | CuTc (2 equiv.)                             | dioxane (0.1 M)               | 70 °C       | 6 min  | 35            |
| 13    | $\text{Pd}(\text{PPh}_3)_4$ (20 mol%)                             | CuTc (1.5 equiv.)                           | dioxane (0.1 M)               | 70 °C       | 10 min | 27            |
| 14    | $\text{Pd}(\text{PPh}_3)_4$ (20 mol%)                             | CuTc (2 equiv.)                             | dioxane/hexane 1/1 (0.1 M)    | 70 °C       | 30 min | 15            |
| 15    | $\text{Pd}(\text{PPh}_3)_4$ (20 mol%)                             | CuMeSal (2 equiv.)                          | dioxane (25 mM)               | 70 °C       | 5 min  | 34            |
| 16    | $\text{Pd}(\text{PPh}_3)_4$ (20 mol%)                             | CuTc (2 equiv.)                             | dioxane (25 mM)               | 70 °C       | 3 min  | 48            |
| 17    | $\text{Pd}(\text{PPh}_3)_4$ (20 mol%)                             | CuTc (2 equiv.)                             | dioxane (10 mM)               | 70 °C       | 8 min  | 50            |
| 18    | $\text{Pd}(\text{PPh}_3)_4$ (20 mol%)                             | CuTc (2 equiv.)                             | dioxane (5 mM)                | 70 °C       | 15 min | 55            |
| 19    | $\text{Pd}(\text{PPh}_3)_4$ (20 mol%)                             | CuTc (2 equiv.)                             | dioxane (2 mM)                | 70 °C       | 30 min | 35            |
| 20    | $\text{Pd}(\text{PPh}_3)_4$ (15 mol%)                             | CuTc (2 equiv.)                             | dioxane (5 mM)                | 70 °C       | 15 min | 58            |
| 21    | $\text{Pd}(\text{PPh}_3)_4$ (15 mol%)                             | CuTc (2 equiv.)                             | dioxane (5 mM)                | 100 °C      | 16 min | 61            |
| 22    | $\text{Pd}(\text{PPh}_3)_4$ (15 mol%)                             | CuTc (2 equiv.)                             | dioxane (5 mM)                | 100 °C      | 18 min | 58            |
| 23    | $\text{Pd}(\text{PPh}_3)_4$ (15 mol%)                             | CuTc (2 equiv.)                             | dioxane (5 mM)                | 100 °C      | 20 min | 57            |

## Tetrazine stability in PBS buffer in ambient light at 25°C

Solutions (3 mL) of tetrazine **5b**, **5l** and **6c** (400  $\mu$ M) were prepared in PBS buffer (pH 7.4) in vials and stored in ambient light at 25 °C. Tetrazine concentrations were determined by recording the absorbance at 518 nm (**6c**) and 520 nm (**5b** and **5l**) in cuvettes in day 0, 1, 3 and 5. A solution of **6a** (50  $\mu$ M) was prepared in PBS buffer (pH 7.4) in vials and stored in ambient light at room temperature. Tetrazine concentration was determined by recording the absorbance at 520 nm in cuvettes at day 0, 1, 3 and 5. Results show **5b**, **5l**, **6c** and **6a** have 1.8%, 1.7%, 3.9% and 0.8% decomposition per day respectively.

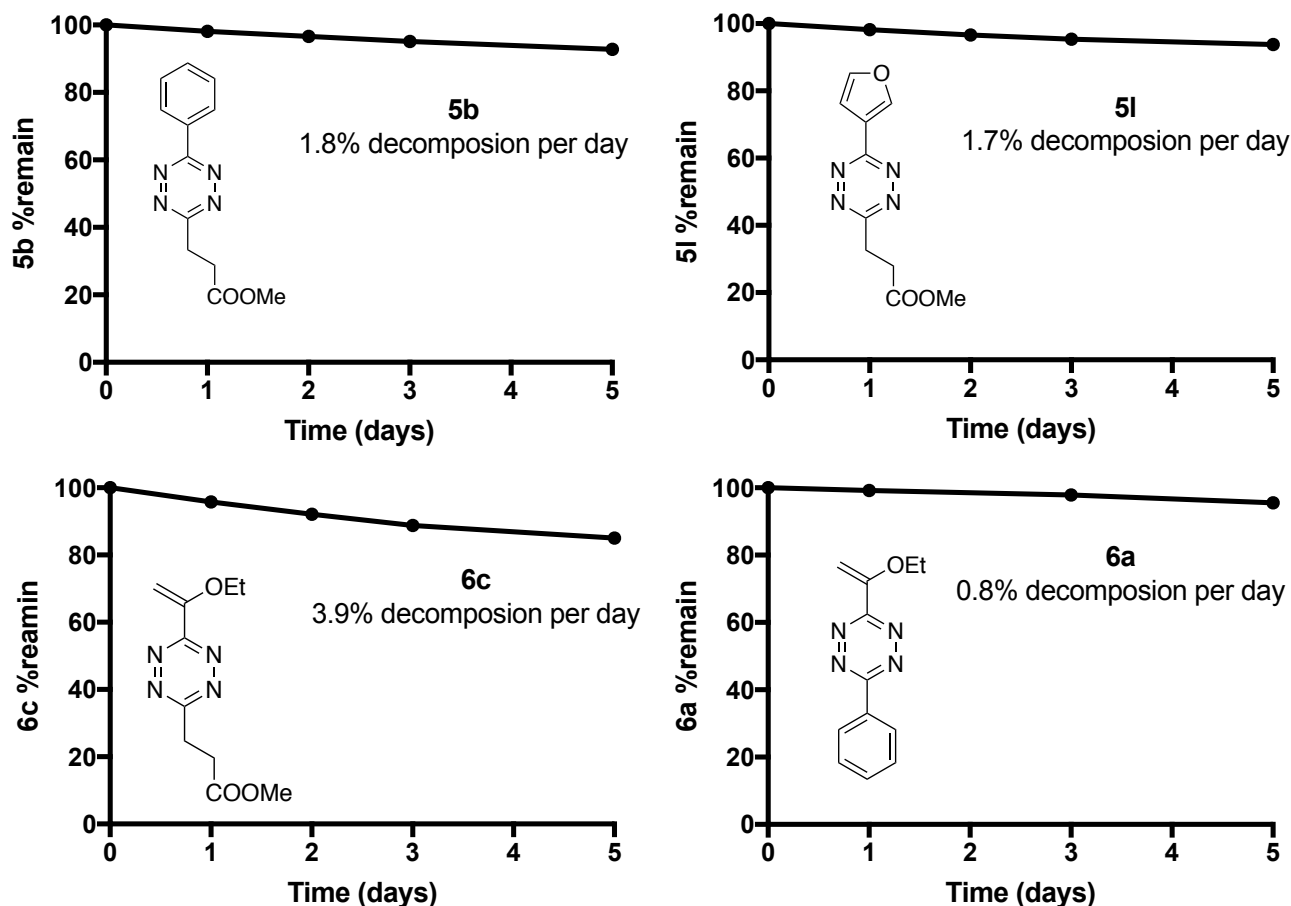

Figure S1A. Stability of tetrazine **5b**, **5l**, **6c** and **6a** in PBS buffer in ambient light at 25 °C

## Tetrazine stability in Opti-MEM media in ambient light at 25°C

Solutions (10 mL) of tetrazine **5b** and **6c** (400  $\mu$ M) were prepared in Opti-MEM media in vials and stored in ambient light at 25 °C. 2 mL of solution was extracted by 2 mL of Et<sub>2</sub>O in different time point. Tetrazine concentrations were determined by recording the absorbance of Et<sub>2</sub>O at 545 nm. Results show **5b** and **6c** have 6.7% and 10.8% decomposition per day respectively.

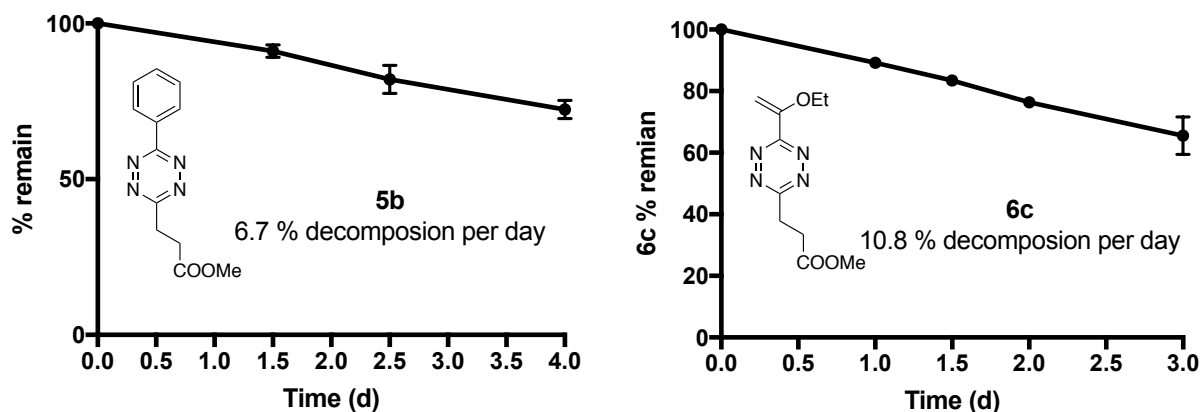

Figure S1B. Stability of tetrazine **5b** and **6c** in Opti-MEM media in ambient light at 25 °C

## Stopped-flow kinetic analysis of tetrazines **5b**, **6b**, **6h**, **6e** and **4f** with *eq*-5-hydroxy-*trans*-cyclooctene in PBS buffer at 25°C

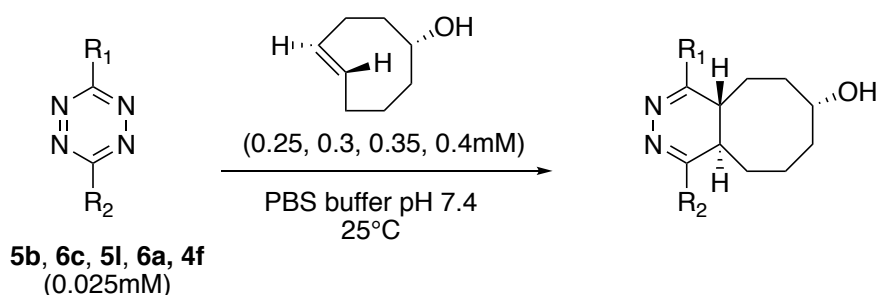

Solutions (5 mL) of tetrazines **5b**, **6c**, **5l**, **6a** and **4f** (0.050 mM) was prepared in PBS buffer (pH 7.4). Solutions (10 mL) of *eq*-5-hydroxy-*trans*-cyclooctene (0.50, 0.60, 0.70, 0.80 mM) were prepared in PBS buffer (pH 7.4). The reactions between tetrazines and *trans*-cyclooctene were measured under pseudo-first order conditions using SX 18MV-R stopped-flow spectrophotometer (Applied Photophysics Ltd.). Each solution of tetrazine and *trans*-cyclooctene were injected in equal volumes via 3 mL syringes into the stopped-flow instrument at 25 °C, resulting in final concentration of 0.025 mM of tetrazines and 0.25, 0.30, 0.35, 0.40 mM *trans*-cyclooctene. The reaction was monitored by the decay of absorbance associated with the tetrazines (**5b** at 263 nm, **6c** at 268 nm, **5l** at 274 nm, **6a** at 296 nm, **4f** at 266 nm). Reaction were repeated in triplicate. With Prism software, an observed rate constant,  $k_{\text{obs}}$ , was obtained by nonlinear regression. Second order rate constants,  $k_2$ , were calculated by linear regression between  $k_{\text{obs}}$  and final concentration of *trans*-cyclooctene.

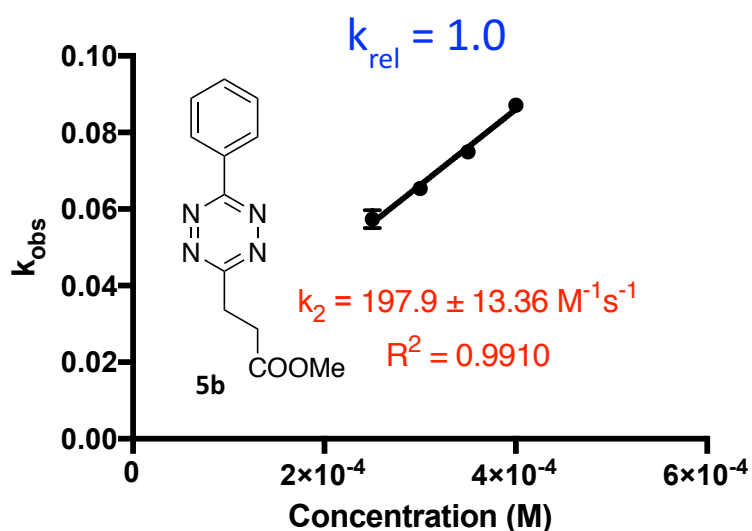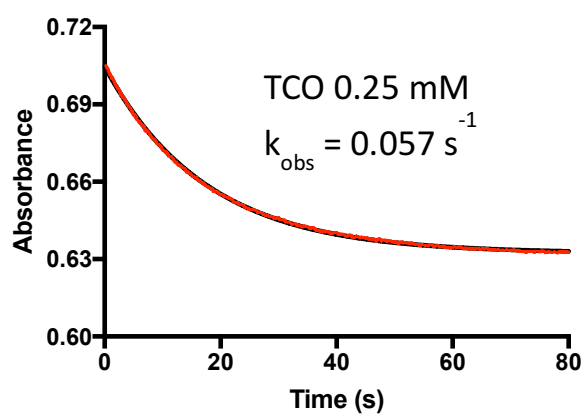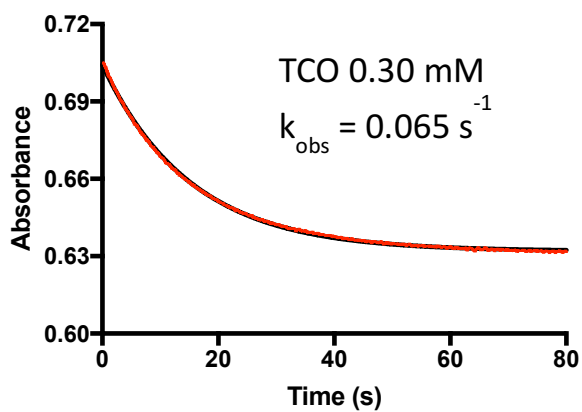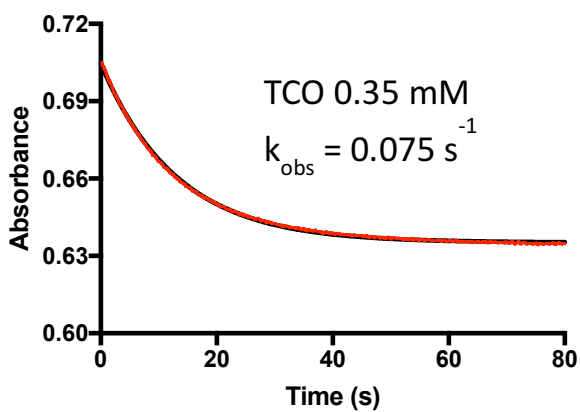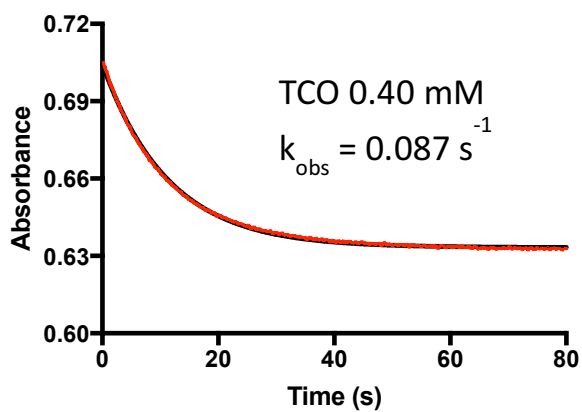

**Figure S2A** Pseudo-first order stopped-flow kinetics of tetrazine **5b** and eq. 5-hydroxy-*trans*-cyclooctene. The plot shows the decay of absorbance at 263 nm measured by a stopped-flow instrument (red curve). The nonlinear regression calculation by prism software is fitted as black curve. Triplicate  $k_{obs}$  results are shown on plot of  $k_{obs}$  across four different concentrations of *trans*-cyclooctene. Second-order rate constant  $k_2$  was calculated by prism software, indicating relative rate,  $k_{rel}$ , of **5b** as 1.0.

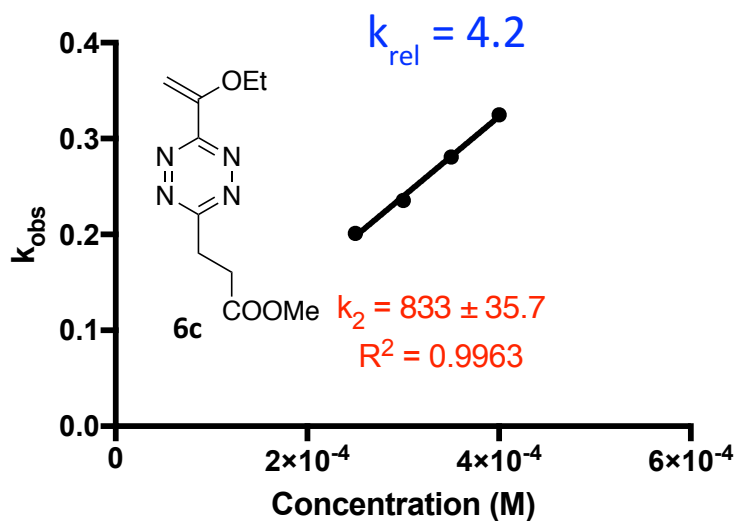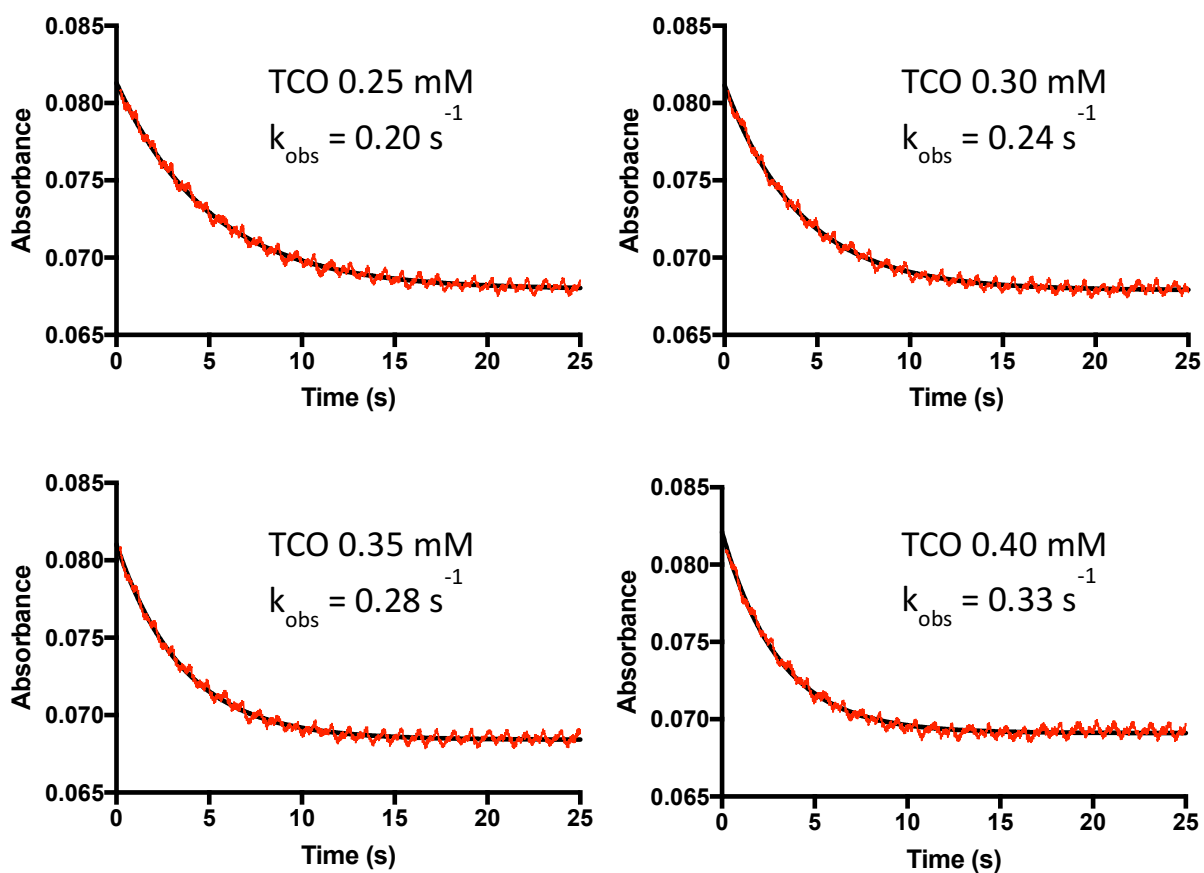

**Figure S2B** Pseudo-first order stopped-flow kinetics of tetrazine **6c** and eq. 5-hydroxy-*trans*-cyclooctene. The plot shows the decay of absorbance at 268 nm measured by a stopped-flow instrument (red curve). The nonlinear regression calculation by prism software is fitted as black curve. Triplicate  $k_{obs}$  results are shown on plot of  $k_{obs}$  across four different concentrations of *trans*-cyclooctene. Second-order rate constant  $k_2$  was calculated by prism software, indicating relative rate,  $k_{rel}$ , of **6c** as 4.2.



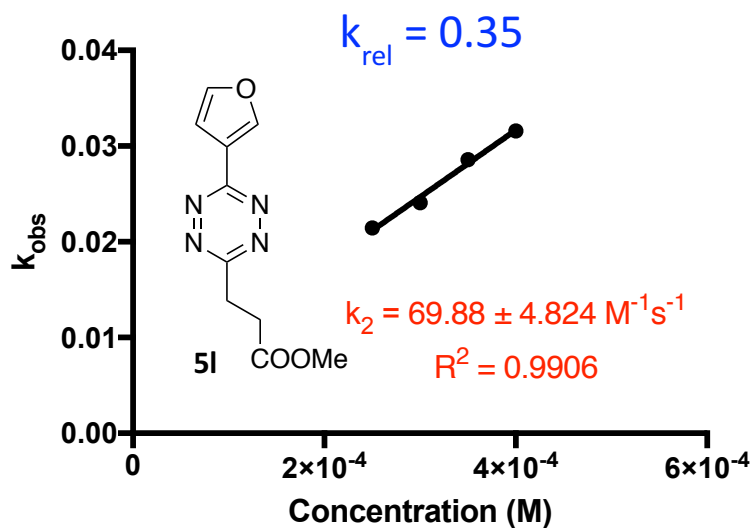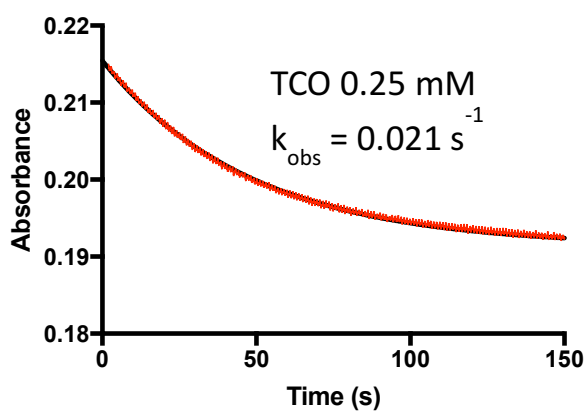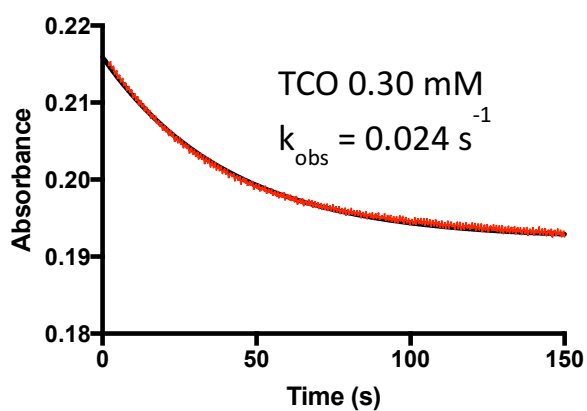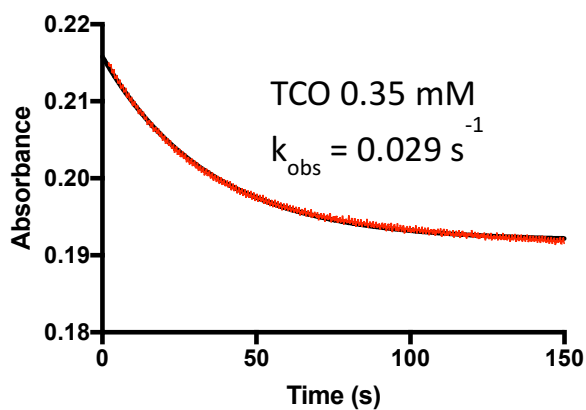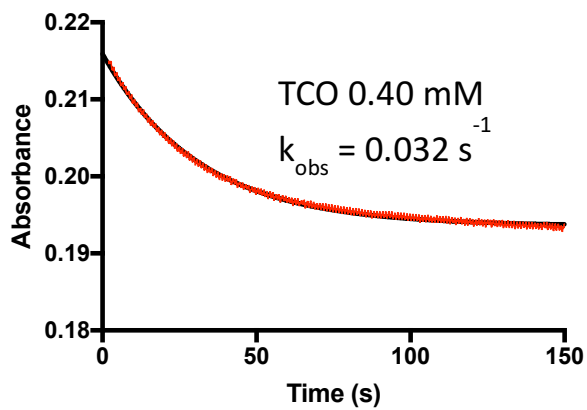

**Figure S2C** Pseudo-first order stopped-flow kinetics of tetrazine **5I** and eq. 5-hydroxy-*trans*-cyclooctene. The plot shows the decay of absorbance at 274 nm measured by a stopped-flow instrument (red curve). The nonlinear regression calculation by prism software is fitted as black curve. Triplicate  $k_{\text{obs}}$  results are shown on plot of  $k_{\text{obs}}$  across four different concentrations of *trans*-cyclooctene. Second-order rate constant  $k_2$  was calculated by prism software, indicating relative rate,  $k_{\text{rel}}$ , of **5I** as 0.35.

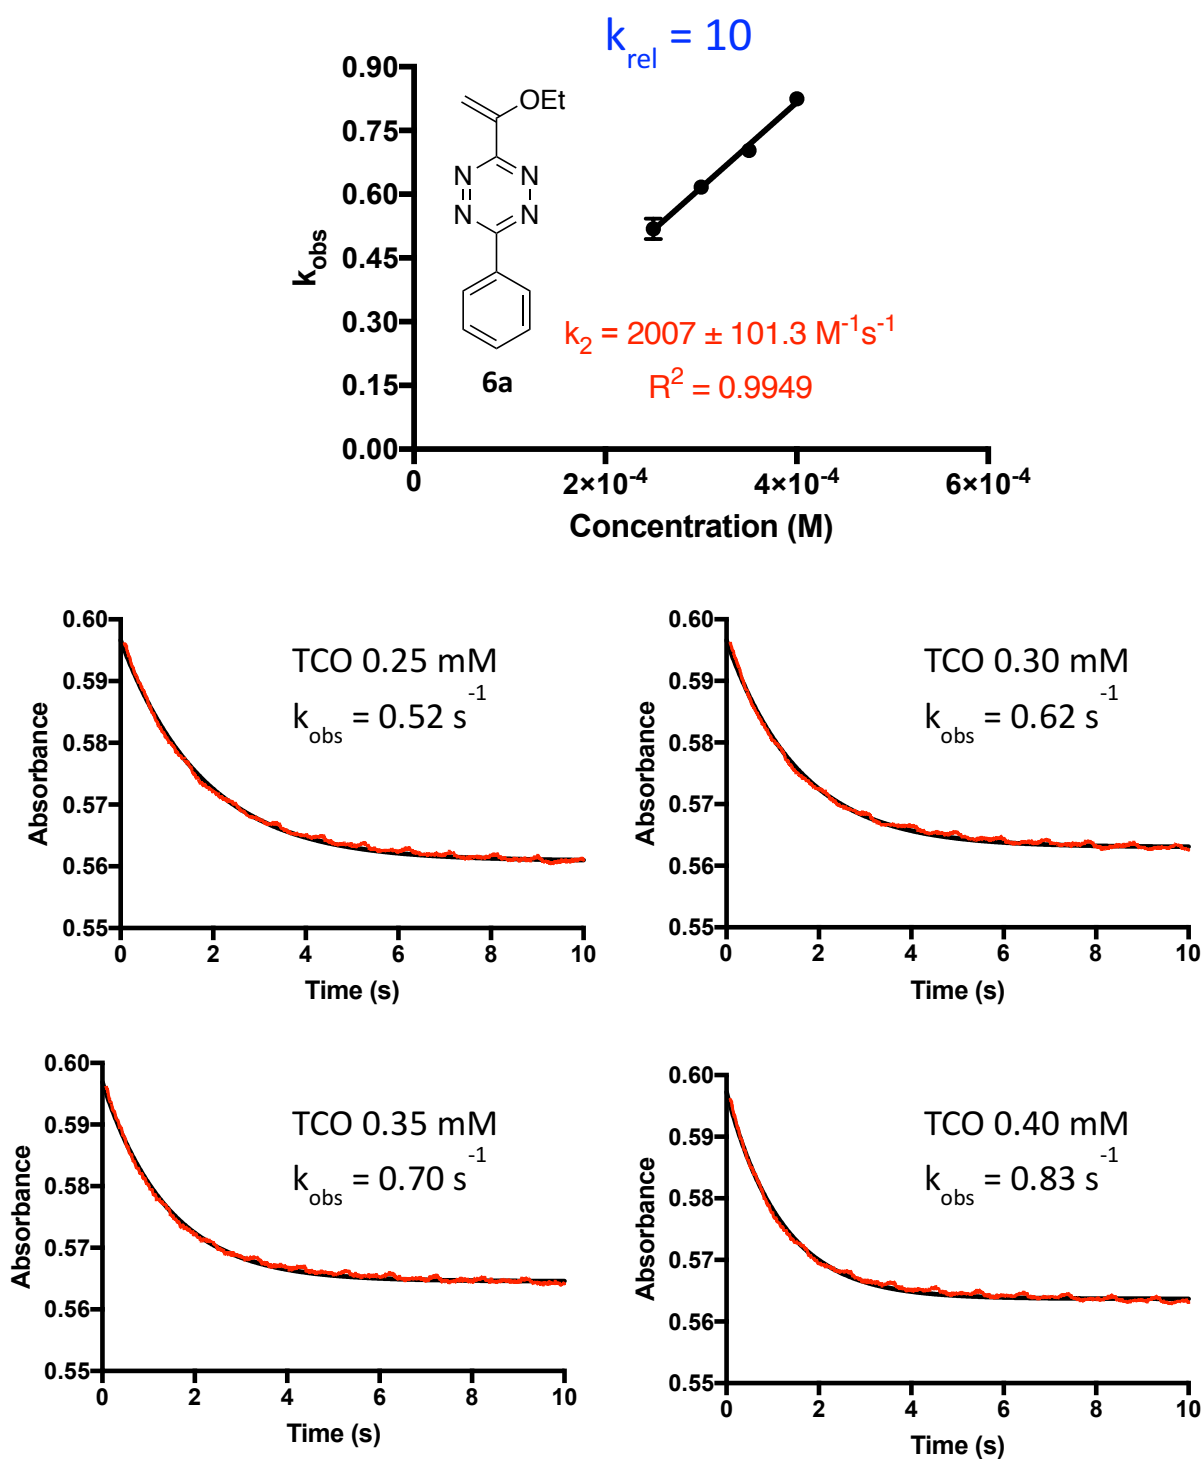

**Figure S2D** Pseudo-first order stopped-flow kinetics of tetrazine **6a** and eq. 5-hydroxy-*trans*-cyclooctene. The plot shows the decay of absorbance at 296 nm measured by a stopped-flow instrument (red curve). The nonlinear regression calculation by prism software is fitted as black curve. Triplicate  $k_{\text{obs}}$  results are shown on plot of  $k_{\text{obs}}$  across four different concentrations of *trans*-cyclooctene. Second-order rate constant  $k_2$  was calculated by prism software, indicating relative rate,  $k_{\text{rel}}$ , of **6a** as 10.

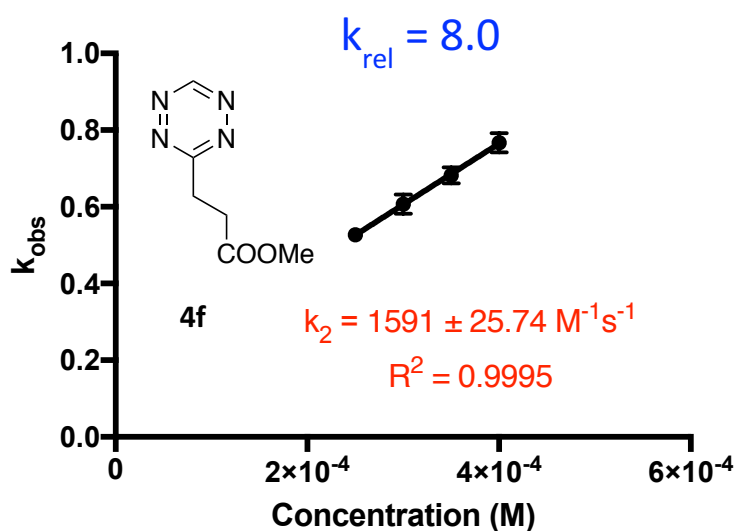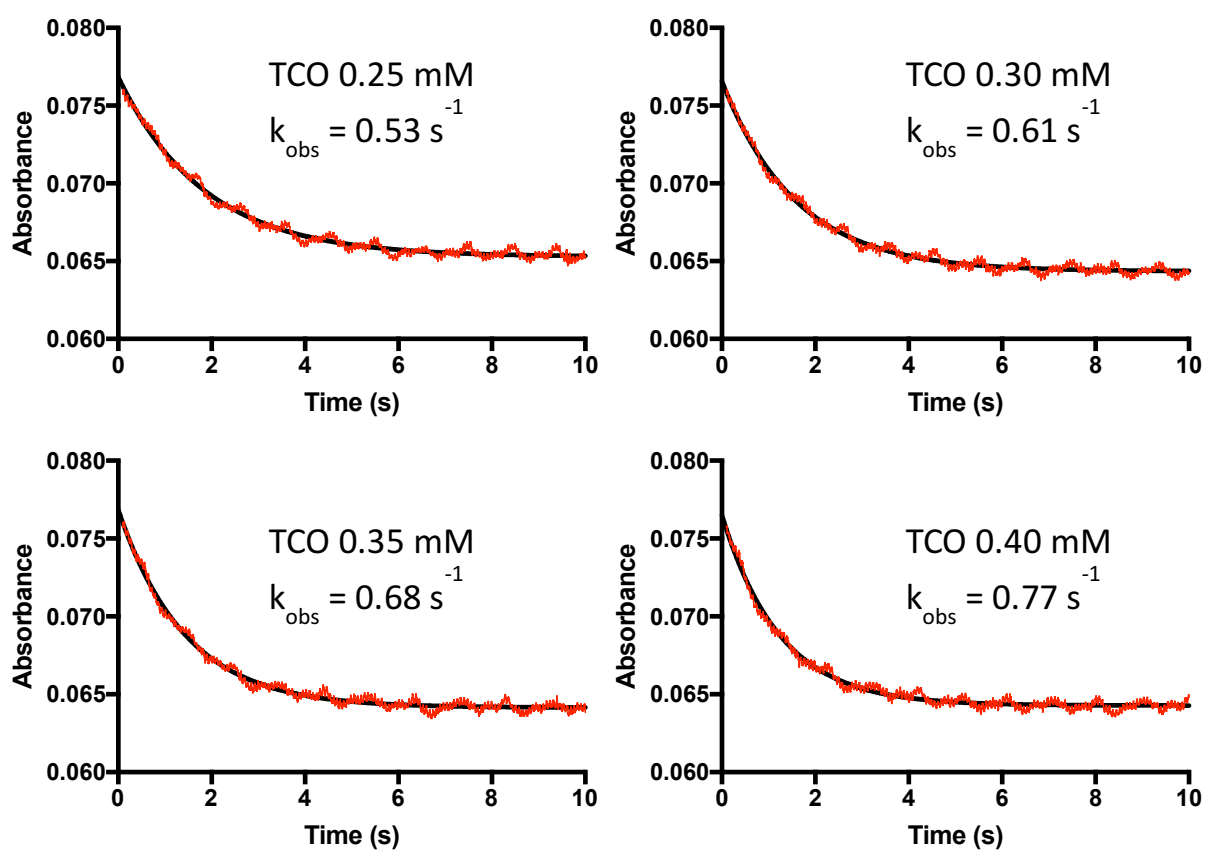

**Figure S2E** Pseudo-first order stopped-flow kinetics of tetrazine **4f** and eq. 5-hydroxy-*trans*-cyclooctene. The plot shows the decay of absorbance at 266 nm measured by a stopped-flow instrument (red curve). The nonlinear regression calculation by prism software is fitted as black curve. Triplicate  $k_{obs}$  results are shown on plot of  $k_{obs}$  across four different concentrations of *trans*-cyclooctene. Second-order rate constant  $k_2$  was calculated by prism software, indicating relative rate,  $k_{rel}$ , of **4f** as 8.0.

## Differential Scanning Calorimetry (DSC)

DSC data of S-methylisothiocarbohydrazidium iodide (**2**) was obtained on a Mettler-Toledo Differential Scanning Calorimeter 3+. Samples were loaded into a goldplated high-pressure pan, held at 30 °C for 10 minutes, then a gradient of 30 °C to 400 °C at 5 °C/min. Appropriate precautions should be followed when handling compound **2**, as this compound is flagged as potentially shock and explosive positive by the Pfizer-modified Yoshida correlation. Quoting Sperry et al.,<sup>[1]</sup> "The Yoshida correlations are mathematical equations used to predict a material's potential to exhibit impact sensitivity and explosivity as a function of its DSC... Yoshida correlations are meant to be very conservative to ensure that all compounds that have the potential to be either shock-sensitive and/or explosive are flagged. Pfizer (as well as many other pharmaceutical companies) has taken the Yoshida correlations and applied an additional degree of conservatism to further reduce the likelihood of any false negatives so that all materials that could exhibit impact sensitivity or explosivity are thoroughly studied before their use in large-scale manufacture of active pharmaceutical ingredients (APIs) begins."

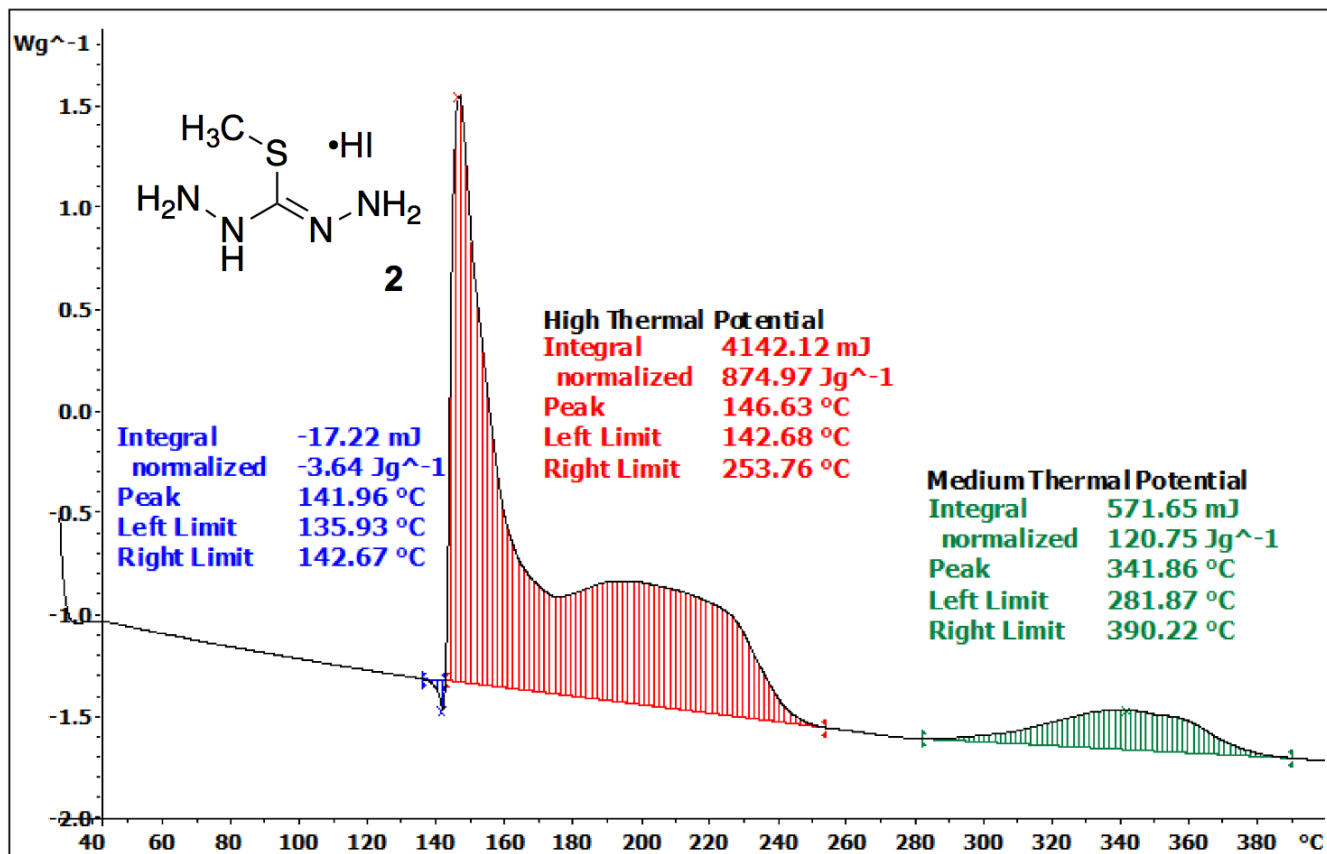

Figure S3 DSC result of methyl thiocarbohydrazide iodide salt (**2**)

## Synthesis of methyl thiocarbohydrazide iodide salt (**2**)

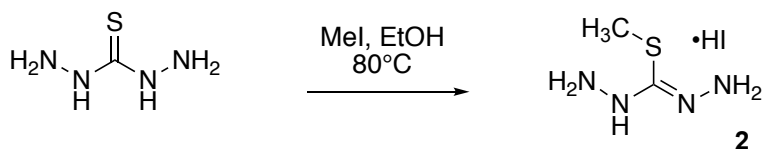

Compound **2** was prepared according to literature protocol.<sup>[2]</sup> A dry round bottom flask was charged with thiocarbohydrazide (500 mg, 4.71 mmol, 1 equiv.), methyl iodide (323  $\mu$ L, 5.18 mmol, 1.1 equiv.) and ethanol (15 mL, 0.3 M). After refluxing at 80 °C for 3 h, reaction mixture was cooled down and hexane was added. After cooling down in freezer (-20 °C) overnight, the reaction mixture was filtered, solid was washed with cold ethanol:hexane 1:1 and drying under vacuum, a white solid (700 mg, 2.82 mmol, 60%) was collected and used directly without further purification.

## General protocol for the synthesis of oxetane esters

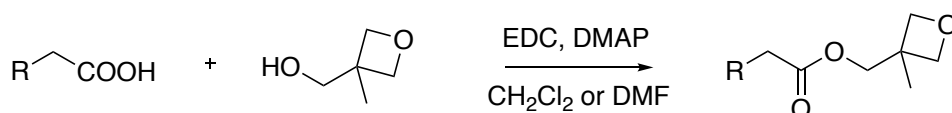

A dry round-bottom flask was charged with 3-methyl-3-oxetanemethanol (1.1 equiv.), 1-(3-dimethylaminopropyl)-3-ethylcarbodiimide hydrochloride (EDC·HCl, 1.2 equiv.) and DMAP (0.10 equiv.). The flask was outfitted with a septum-fitted gas inlet adapter and then evacuated and filled with nitrogen. Anhydrous CH<sub>2</sub>Cl<sub>2</sub> or DMF was added to the flask via syringe. The flask was cooled by an ice bath (0 °C), and the carboxylic acid (1 equiv.) was added. After stirring under nitrogen at 0 °C for 15 min and at r.t overnight, the reaction mixture was diluted with CH<sub>2</sub>Cl<sub>2</sub>. The solution was washed with saturated sodium bicarbonate solution, water and brine, and the organics were dried over sodium sulfate and concentrated by rotary evaporation. The residue was purified by flash column chromatography on silica gel.

### (3-methyloxetan-3-yl)methyl 2-(benzyloxy)acetate (1a)

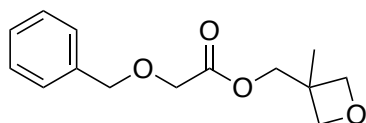

The general protocol was followed with benzyloxyacetic acid (1196 mg, 11.83 mmol), 3-methyl-3-oxetanemethanol (1329 mg, 13.02 mmol), EDC (2721 mg, 14.20 mmol), DMAP (144.5 mg, 1.183 mmol) in CH<sub>2</sub>Cl<sub>2</sub> (24 mL, 0.25 M). A colorless oil (2783 mg, 11.12 mmol, 94%) was obtained after column chromatography (Hexane:EA 100:0 to 75:25). <sup>1</sup>H NMR (400 MHz, CDCl<sub>3</sub>) δ 7.38 - 7.67 (m, 5H), 4.64 (s, 2H), 4.50 (d, *J* = 6.0 Hz, 2H), 4.38 (d, *J* = 6.0 Hz, 2H), 4.26 (s, 2H), 4.15 (s, 2H), 1.32 (s, 3H). <sup>13</sup>C NMR (101 MHz, CDCl<sub>3</sub>) δ 170.56 (C), 137.01 (C), 128.60 (CH), 128.15 (CH), 128.12 (CH), 79.50 (CH<sub>2</sub>), 73.45 (CH<sub>2</sub>), 68.99 (CH<sub>2</sub>), 67.01 (CH<sub>2</sub>), 39.12 (C), 21.18 (CH<sub>3</sub>). IR (KBr), ν/cm<sup>-1</sup> 3064, 3031, 2962, 2872, 1750, 1455, 1257, 1197, 1127, 981, 740, 699. HRMS [M+H]<sup>+</sup> *m/z* calcd. for [C<sub>14</sub>H<sub>18</sub>O<sub>4</sub>]<sup>+</sup> 251.1283, found 251.1278.

### (3-methyloxetan-3-yl)methyl 4-((*tert*-butoxycarbonyl)amino)benzoate (1b)

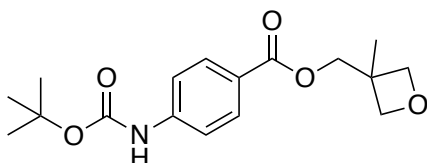

The general protocol was followed with 4-(Boc-amino)benzoic acid (1899 mg, 8.01 mmol), 3-methyl-3-oxetanemethanol (900 mg, 8.81 mmol), EDC (1843 mg, 9.62 mmol), DMAP (97.8 mg, 0.801 mmol) in CH<sub>2</sub>Cl<sub>2</sub> (16 mL, 0.5 M). A white solid (2468 mg, 7.68 mmol, 96%) was obtained after column chromatography (Hexane:EA 100:0 to 85:15). <sup>1</sup>H NMR (400 MHz, CDCl<sub>3</sub>) δ 7.98 (app d, *J* = 8.8 Hz, 2H), 7.43 (app d, *J* = 8.8 Hz, 2H), 6.74 (s, 1H), 4.64 (d, *J* = 6.0 Hz, 2H), 4.45 (d, *J* = 6.0 Hz, 2H), 4.37 (s, 2H), 1.53 (s, 9H), 1.42 (s, 3H). <sup>13</sup>C NMR (101 MHz, CDCl<sub>3</sub>) δ 166.29 (C), 152.26 (C), 143.09 (C), 131.09 (CH), 124.12 (C), 117.52 (CH), 81.42 (C), 79.80 (CH<sub>2</sub>), 68.95 (CH<sub>2</sub>), 39.45 (C), 28.41 (CH<sub>3</sub>), 21.46 (CH<sub>3</sub>). IR (KBr), ν/cm<sup>-1</sup> 3375, 3100, 3060, 2971, 2886, 1724, 1678, 1600, 1543, 1411, 1324, 1240, 1159, 1115, 863, 767. HRMS [M+H]<sup>+</sup> *m/z* calcd. for [C<sub>17</sub>H<sub>24</sub>O<sub>5</sub>N]<sup>+</sup> 322.1654, found 322.1646.

### (3-methyloxetan-3-yl)methyl 4-(((*tert*-butoxycarbonyl)amino)methyl)benzoate (1c)

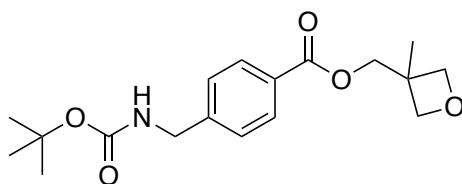

The general protocol was followed with Boc-(4-aminophenyl)acetic acid (2010 mg, 8.01 mmol), 3-methyl-3-oxetanemethanol (900 mg, 8.82 mmol), EDC (1834 mg, 9.62 mmol), DMAP (97.8 mg, 0.801 mmol) in CH<sub>2</sub>Cl<sub>2</sub> (16 mL, 0.25 M). A white solid (2520 mg, 7.52 mmol, 94%) was obtained after column chromatography (Hexane:EA 100:0 to 75:25). <sup>1</sup>H NMR (400 MHz, CDCl<sub>3</sub>) δ 8.02 (app d, *J* = 8.2 Hz, 2H), 7.36 (app d, *J* = 8.2 Hz, 2H), 4.95 (s, 1H), 4.64 (d, *J* = 6.0 Hz, 2H), 4.46 (d, *J* = 6.0 Hz, 2H), 4.38 (s, 2H), 4.37 (s, 2H),

1.46 (s, 9H), 1.42 (s, 3H).  $^{13}\text{C}$  NMR (101 MHz,  $\text{CDCl}_3$ )  $\delta$  166.46 (C), 156.02 (C), 144.75 (C), 130.11 (CH), 128.97 (C), 127.36 (CH), 79.97 (C), 79.75 ( $\text{CH}_2$ ), 69.12 ( $\text{CH}_2$ ), 44.44 ( $\text{CH}_2$ ), 39.42 (C), 28.52 ( $\text{CH}_3$ ), 21.44 ( $\text{CH}_3$ ). IR (KBr),  $\nu/\text{cm}^{-1}$  3386, 3008, 2981, 2946, 2880, 1717, 1689, 1517, 1289, 1275, 1246, 1170, 1110, 983, 756. HRMS  $[\text{M}+\text{H}]^+$   $m/z$  calcd. for  $[\text{C}_{18}\text{H}_{26}\text{O}_5\text{N}]^+$  336.1811, found 336.1804.

#### (3-methyloxetan-3-yl)methyl 4-nitrobenzoate (1d)

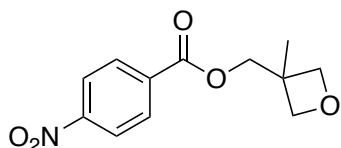

The general protocol was followed with 4-nitro-benzoic acid (1191 mg, 7.12 mmol), 3-methyl-3-oxetanemethanol (800 mg, 7.84 mmol), EDC (1638 mg, 8.55 mmol), DMAP (86.9 mg, 0.712 mmol) in  $\text{CH}_2\text{Cl}_2$  (35 mL, 0.2 M). A white solid (1520 mg, 6.05 mmol, 85%) was obtained after column chromatography (Hexane:Acetone 10:0 to 9:1).  $^1\text{H}$  NMR (400 MHz,  $\text{CDCl}_3$ )  $\delta$  8.28 (app d,  $J = 9.0$  Hz, 2H), 8.21 (app d,  $J = 9.0$  Hz, 2H), 4.61 (d,  $J = 6.1$  Hz, 2H), 4.47 (d,  $J = 6.1$  Hz, 2H), 4.44 (s, 2H), 1.42 (s, 3H).  $^{13}\text{C}$  NMR (101 MHz,  $\text{CDCl}_3$ )  $\delta$  164.70 (C), 150.68 (C), 135.26 (C), 130.82 (CH), 123.71 (CH), 79.49 ( $\text{CH}_2$ ), 69.92 ( $\text{CH}_2$ ), 39.32 (C), 21.24 ( $\text{CH}_3$ ). IR (KBr),  $\nu/\text{cm}^{-1}$  3010, 3000, 2961, 2874, 1715, 1708, 1607, 1525, 1344, 1280, 1263, 979, 847, 719. HRMS  $[\text{M}+\text{H}]^+$   $m/z$  calcd. for  $[\text{C}_{12}\text{H}_{14}\text{O}_5\text{N}]^+$  252.0872, found 252.0863.

#### (3-methyloxetan-3-yl)methyl 4-methoxybenzoate (1e)

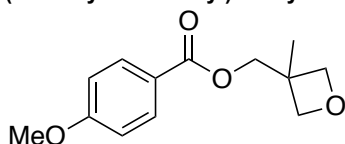

The general protocol was followed with 4-nitro-benzoic acid (608 mg, 3.56 mmol), 3-methyl-3-oxetanemethanol (400 mg, 3.92 mmol), EDC (819 mg, 4.27 mmol), DMAP (43.5 mg, 0.356 mmol) in  $\text{CH}_2\text{Cl}_2$  (16 mL, 0.25 M). A colorless oil (576 mg, 2.40 mmol, 61%) was obtained after column chromatography (Hexane:Acetone 10:0 to 9:1).  $^1\text{H}$  NMR (400 MHz,  $\text{CDCl}_3$ )  $\delta$  8.01 (app d,  $J = 8.9$  Hz, 2H), 6.93 (app d,  $J = 8.9$  Hz, 2H), 4.64 (d,  $J = 5.9$  Hz, 2H), 4.45 (d,  $J = 5.9$  Hz, 2H), 4.36 (s, 2H), 3.86 (s, 3H), 1.42 (s, 3H).  $^{13}\text{C}$  NMR (101 MHz,  $\text{CDCl}_3$ )  $\delta$  166.41 (C), 163.63 (C), 131.79 (CH), 122.38 (C), 113.82 (CH), 79.78 ( $\text{CH}_2$ ), 68.82 ( $\text{CH}_2$ ), 55.59 ( $\text{CH}_3$ ), 39.43 (C), 21.45 ( $\text{CH}_3$ ). IR (KBr),  $\nu/\text{cm}^{-1}$  3078, 2962, 2871, 1717, 1607, 1512, 1256, 1168, 1103, 982, 770. HRMS  $[\text{M}+\text{H}]^+$   $m/z$  calcd. for  $[\text{C}_{13}\text{H}_{17}\text{O}_4]^+$  237.1127, found 237.1120.

#### (3-methyloxetan-3-yl)methyl 4-bromobenzoate (1f)

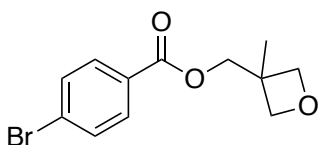

The general protocol was followed with 4-bromobenzoic acid (604 mg, 3.03 mmol), 3-methyl-3-oxetanemethanol (340 mg, 3.33 mmol), EDC (690 mg, 3.64 mmol), DMAP (37.0 mg, 0.303 mmol) in  $\text{CH}_2\text{Cl}_2$  (15 mL, 0.20 M). A white solid (812 mg, 2.85 mmol, 95%) was obtained after column chromatography (Hexane:EA 10:0 to 95:5).  $^1\text{H}$  NMR (400 MHz,  $\text{CDCl}_3$ )  $\delta$  7.94 (app d,  $J = 8.6$  Hz, 2H), 7.62 (app d,  $J = 8.6$  Hz, 2H), 4.65 (d,  $J = 6.0$  Hz, 2H), 4.49 (d,  $J = 6.0$  Hz, 2H), 4.42 (s, 2H), 1.45 (s, 3H).  $^{13}\text{C}$  NMR (101 MHz,  $\text{CDCl}_3$ )  $\delta$  165.96 (C), 131.97 (CH), 131.28 (CH), 128.87 (C), 128.50 (C), 79.69 ( $\text{CH}_2$ ), 69.37 ( $\text{CH}_2$ ), 39.40 (C), 21.40 ( $\text{CH}_3$ ). IR (KBr),  $\nu/\text{cm}^{-1}$  3065, 2963, 2873, 1721, 1590, 1484, 1398, 1263, 1174, 1104, 1012, 982, 848, 756. HRMS  $[\text{M}+\text{H}]^+$   $m/z$  calcd. for  $[\text{C}_{12}\text{H}_{14}\text{O}_3\text{Br}]^+$  285.0126, found 285.0120.

#### methyl ((3-methyloxetan-3-yl)methyl) terephthalate (1g)

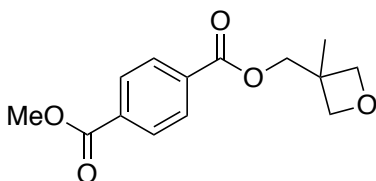

The general protocol was followed with monomethyl terephthalate (1440 mg, 8.01 mmol), 3-methyl-3-oxetanemethanol (900 mg, 8.82 mmol), EDC (1840 mg, 9.62 mmol), DMAP (97.9 mg, 0.801 mmol) in  $\text{CH}_2\text{Cl}_2$  (32 mL, 0.25 M). A white solid (1956 mg, 7.40 mmol,

93%) was obtained after column chromatography (Hexane:EA 10:0 to 8:2).  $^1\text{H}$  NMR (400 MHz,  $\text{CDCl}_3$ )  $\delta$  8.12 (app s, 4H), 4.65 (d,  $J$  = 6.0 Hz, 2H), 4.48 (d,  $J$  = 6.0 Hz, 2H), 4.43 (s, 2H), 3.96 (s, 3H), 1.44 (s, 3H).  $^{13}\text{C}$  NMR (101 MHz,  $\text{CDCl}_3$ )  $\delta$  166.36 (C), 165.90 (C), 134.27 (C), 133.74 (C), 129.79 (CH), 129.75 (CH), 79.71 ( $\text{CH}_2$ ), 69.58 ( $\text{CH}_2$ ), 52.67 ( $\text{CH}_3$ ), 39.43 (C), 21.42 ( $\text{CH}_3$ ). IR (KBr),  $\nu/\text{cm}^{-1}$  3012, 2964, 2936, 2871, 1732, 1716, 1506, 1436, 1395, 1279, 1249, 1125, 1105, 1016, 979, 726. HRMS  $[\text{M}+\text{H}]^+$   $m/z$  calcd. for  $[\text{C}_{14}\text{H}_{17}\text{O}_5]^+$  265.1076, found 265.1067.

#### (3-methyloxetan-3-yl)methyl 4-cyanobenzoate (1h)

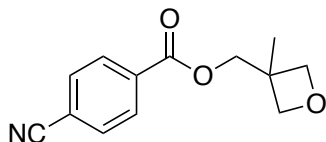

The general protocol was followed with 4-cyanobenzoic acid (608 mg, 3.56 mmol), 3-methyl-3-oxetanemethanol (400 mg, 3.92 mmol), EDC (920 mg, 4.27 mmol), DMAP (43.5 mg, 0.356 mmol) in  $\text{CH}_2\text{Cl}_2$  (16 mL, 0.25 M). A white solid (795 mg, 3.44 mmol, 86%) was obtained after column chromatography (Hexane:EA 10:0 to 9:1).  $^1\text{H}$  NMR (400 MHz,  $\text{CDCl}_3$ )  $\delta$  8.16 (app d,  $J$  = 8.5 Hz, 2H), 7.77 (app d,  $J$  = 8.5 Hz, 2H), 4.62 (d,  $J$  = 6.0 Hz, 2H), 4.48 (d,  $J$  = 6.0 Hz, 2H), 4.44 (s, 2H), 1.43 (s, 3H).  $^{13}\text{C}$  NMR (101 MHz,  $\text{CDCl}_3$ )  $\delta$  165.04 (C), 133.78 (C), 132.48 (CH), 130.28 (CH), 118.05 (C), 116.78 (C), 79.60 ( $\text{CH}_2$ ), 69.86 ( $\text{CH}_2$ ), 39.40 (C), 21.34 ( $\text{CH}_3$ ). IR (KBr),  $\nu/\text{cm}^{-1}$  3051, 2960, 2927, 2873, 2231, 1725, 1610, 1461, 1406, 1377, 1280, 1264, 1118, 1107, 981, 766. HRMS  $[\text{M}+\text{H}]^+$   $m/z$  calcd. for  $[\text{C}_{13}\text{H}_{14}\text{O}_3\text{N}]^+$  232.0974, found 232.0964

#### (3-methyloxetan-3-yl)methyl 6-methoxypyridinate (1i)

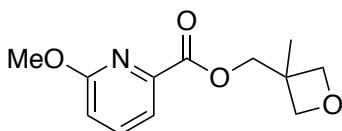

The general protocol was followed with 6-methoxypyridine-2-carboxylic acid (640 mg, 4.18 mmol), 3-methyl-3-oxetanemethanol (472 mg, 4.62 mmol), EDC (962 mg, 5.02 mmol), DMAP (50.9 mg, 0.418 mmol) in  $\text{CH}_2\text{Cl}_2$  (20 mL, 0.2 M). A colorless oil (833 mg, 3.50 mmol, 84%) was obtained after column chromatography (Hexane:EA 100:0 to 85:15).  $^1\text{H}$  NMR (400 MHz,  $\text{CDCl}_3$ )  $\delta$  7.72 - 7.63 (m, 2H), 6.93 (dd,  $J$  = 7.2, 2.0 Hz, 1H), 4.64 (d,  $J$  = 6.0 Hz, 2H), 4.44 (d,  $J$  = 6.0 Hz, 2H), 4.42 (s, 2H), 4.00 (s, 3H), 1.43 (s, 3H).  $^{13}\text{C}$  NMR (101 MHz,  $\text{CDCl}_3$ )  $\delta$  165.17 (C), 164.01 (C), 145.21 (C), 139.10 (CH), 118.69 (CH), 115.59 (CH), 79.70 ( $\text{CH}_2$ ), 69.51 ( $\text{CH}_2$ ), 53.69 (CH<sub>3</sub>), 39.44 (C), 21.35 (CH<sub>3</sub>). IR (KBr),  $\nu/\text{cm}^{-1}$  3078, 2957, 2872, 1740, 1721, 1595, 1574, 1470, 1415, 1329, 1274, 1140, 1028, 985, 825, 770. HRMS  $[\text{M}+\text{H}]^+$   $m/z$  calcd. for  $[\text{C}_{12}\text{H}_{16}\text{O}_4\text{N}]^+$  238.1079, found 238.1073.

#### (3-methyloxetan-3-yl)methyl isonicotinate (1j)

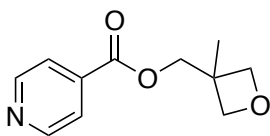

The general protocol was followed with 4-picolinic acid (985 mg, 8.01 mmol), 3-methyl-3-oxetanemethanol (900 mg, 8.82 mmol), EDC (1840 mg, 9.62 mmol), DMAP (97.9 mg, 0.801 mmol) in  $\text{CH}_2\text{Cl}_2$  (16 mL, 0.5 M). A yellow oil (1410 mg, 6.80 mmol, 85%) was obtained after column chromatography (Hexane:EA 100:0 to 85:15).  $^1\text{H}$  NMR (400 MHz,  $\text{CDCl}_3$ )  $\delta$  8.78 (app d,  $J$  = 6.0 Hz, 2H), 7.85 (app d,  $J$  = 6.0 Hz, 2H), 4.61 (d,  $J$  = 6.0 Hz, 2H), 4.46 (d,  $J$  = 6.0 Hz, 2H), 4.43 (s, 2H), 1.41 (s, 3H).  $^{13}\text{C}$  NMR (101 MHz,  $\text{CDCl}_3$ )  $\delta$  165.50 (C), 151.16 (CH), 137.39 (C), 123.23 (CH), 79.86 ( $\text{CH}_2$ ), 70.16 ( $\text{CH}_2$ ), 39.66 (C), 21.59 (CH<sub>3</sub>). IR (KBr),  $\nu/\text{cm}^{-1}$  3034, 2935, 2873, 1730, 1678, 1562, 1408, 1387, 1287, 1124, 1092, 981, 759. HRMS  $[\text{M}+\text{H}]^+$   $m/z$  calcd. for  $[\text{C}_{11}\text{H}_{14}\text{O}_3\text{N}]^+$  208.0974, found 208.0969.

#### methyl ((3-methyloxetan-3-yl)methyl) succinate (1k)

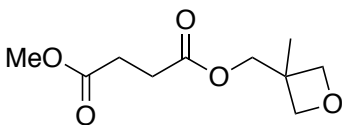

The general protocol was followed with monomethyl succinate (1159 mg, 9.821 mmol) was added into mixture of 3-Methyl-3-oxetanemethanol (1103 mg, 10.80 mmol), EDC (2254 mg, 11.79 mmol), DMAP (120.0 mg, 0.9821 mmol) in CH<sub>2</sub>Cl<sub>2</sub> (20 mL, 0.5 M). A colorless oil (1992 mg, 9.167 mmol, 94%) was obtained after column chromatography (Hexane:EA 100:0 to 75:25). <sup>1</sup>H NMR (600 MHz, CDCl<sub>3</sub>) δ 4.50 (d, *J* = 6.0 Hz, 2H), 4.37 (d, *J* = 6.0 Hz, 2H), 4.18 (s, 2H), 3.69 (s, 3H), 2.70 – 2.66 (m, 2H), 2.65 – 2.62 (m, 2H), 1.32 (s, 3H). <sup>13</sup>C NMR (101 MHz, CDCl<sub>3</sub>) δ 172.79 (C), 172.44 (C), 79.62 (C), 69.01 (CH<sub>2</sub>), 52.04 (CH<sub>3</sub>), 39.16 (CH<sub>2</sub>), 29.12 (CH<sub>2</sub>), 28.94 (CH<sub>2</sub>), 21.25 (CH<sub>3</sub>). IR (KBr), ν/cm<sup>-1</sup> 2958, 2874, 1739, 1438, 1356, 1216, 1159, 981. HRMS [M+H]<sup>+</sup> *m/z* calcd. for [C<sub>10</sub>H<sub>17</sub>O<sub>5</sub>]<sup>+</sup> 217.1076, found 217.1068.

**tert-butyl ((3-methyloxetan-3-yl)methyl) succinate (1l)**

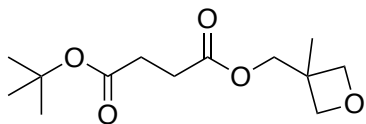

The general protocol was followed with mono-tert-butyl succinate (1861 mg, 10.68 mmol) was added into mixture of 3-Methyl-3-oxetanemethanol (1200 mg, 11.75 mmol), EDC (2457 mg, 12.82 mmol), DMAP (130.5 mg, 1.068 mmol) in CH<sub>2</sub>Cl<sub>2</sub> (21 mL, 0.5 M). A colorless oil (2538 mg, 9.788 mmol, 92%) was obtained after column chromatography (Hexane:EA 100:0 to 75:25). <sup>1</sup>H NMR (400 MHz, CDCl<sub>3</sub>) δ 4.52 (d, *J* = 6.0 Hz, 2H), 4.38 (d, *J* = 6.0 Hz, 2H), 4.19 (s, 2H), 2.64 - 2.61 (m, 2H), 2.58 - 2.54 (m, 2H), 1.44 (s, 9H), 1.33 (s, 3H). <sup>13</sup>C NMR (101 MHz, CDCl<sub>3</sub>) δ 172.71 (C), 171.56 (C), 80.97 (C), 79.72 (CH<sub>2</sub>), 68.97 (CH<sub>2</sub>), 39.20 (C), 30.37 (CH<sub>2</sub>), 28.20 (CH<sub>3</sub>), 21.31 (CH<sub>3</sub>). IR (KBr), ν/cm<sup>-1</sup> 2973, 2935, 2873, 1732, 1459, 1393, 1367, 1248, 1149, 983, 848. HRMS [M+H]<sup>+</sup> *m/z* calcd. for [C<sub>13</sub>H<sub>23</sub>O<sub>5</sub>]<sup>+</sup> 259.1545, found 259.1539.

**methyl ((3-methyloxetan-3-yl)methyl) malonate (1m)**

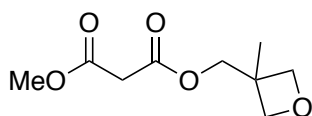

The general protocol was followed with monomethyl malonate (942 μL, 8.99 mmol) was added into mixture of 3-Methyl-3-oxetanemethanol (1010 mg, 9.89 mmol), EDC (2070mg, 10.8 mmol), DMAP (110 mg, 0.899 mmol) in CH<sub>2</sub>Cl<sub>2</sub> (18 mL, 0.5 M). A colorless oil (1237 mg, 6.11 mmol, 68%) was obtained after column chromatography (Hexane:EA 10:0 to 8:2). <sup>1</sup>H NMR (400 MHz, CDCl<sub>3</sub>) δ 4.50 (d, *J* = 6.0 Hz, 2H), 4.37 (d, *J* = 6.0 Hz, 2H), 4.23 (s, 2H), 3.74 (s, 3H), 3.43 (s, 2H), 1.33 (s, 3H). <sup>13</sup>C NMR (101 MHz, CDCl<sub>3</sub>) δ 166.93 (C), 166.65 (C), 79.47 (CH<sub>2</sub>), 69.65 (CH<sub>2</sub>), 52.70 (CH<sub>3</sub>), 41.33 (CH<sub>2</sub>), 39.16 (C), 21.15 (CH<sub>3</sub>). IR (KBr), ν/cm<sup>-1</sup> 2959, 2875, 1737, 1438, 1338, 1277, 1202, 1151, 1024, 979. HRMS [M+H]<sup>+</sup> *m/z* calcd. for [C<sub>9</sub>H<sub>15</sub>O<sub>5</sub>]<sup>+</sup> 203.0919, found 203.0913.

**(3-methyloxetan-3-yl)methyl 2-((tert-butoxycarbonyl)amino)acetate (1n)**

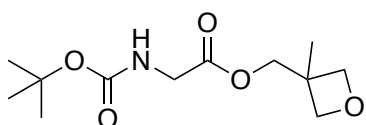

The general protocol was followed with Boc-glycine (1964 mg, 11.21 mmol) was added into mixture of 3-Methyl-3-oxetanemethanol (1259 mg, 12.33 mmol), EDC (2579 mg, 13.45 mmol), DMAP (137.0 mg, 1.121 mmol) in CH<sub>2</sub>Cl<sub>2</sub> (22 mL, 0.5 M). A colorless oil (2613 mg, 10.07 mmol, 90%) was obtained after column chromatography (Hexane:EA 100:0 to 85:15). <sup>1</sup>H NMR (400 MHz, CDCl<sub>3</sub>) δ 5.06 (s, 1H), 4.49 (d, *J* = 6.1 Hz, 2H), 4.37 (d, *J* = 6.1 Hz, 2H), 4.24 (s, 2H), 3.93 (d, *J* = 5.7 Hz, 2H), 1.44 (s, 9H), 1.32 (s, 3H). <sup>13</sup>C NMR (101 MHz, CDCl<sub>3</sub>) δ 170.67 (C), 155.82 (C), 80.21 (C), 79.55 (CH<sub>2</sub>), 69.59 (CH<sub>2</sub>), 42.43 (CH<sub>2</sub>), 39.16 (C), 28.41 (CH<sub>3</sub>), 21.17 (CH<sub>3</sub>). IR (KBr), ν/cm<sup>-1</sup> 3355, 2972, 2935, 2875, 1755, 1717, 1523, 1457, 1366, 1284, 1252, 1166, 1055, 985. HRMS [M+H]<sup>+</sup> *m/z* calcd. for [C<sub>12</sub>H<sub>22</sub>O<sub>5</sub>N]<sup>+</sup> 260.1498, found 260.1492.

**(S)-1-tert-butyl 4-((3-methyloxetan-3-yl)methyl) 2-((tert-butoxycarbonyl)amino)succinate (1o)**

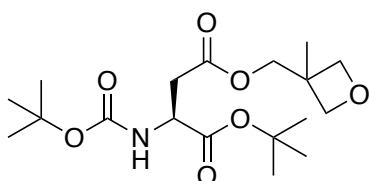



The general protocol was followed with N-Boc-L-aspartic acid 1-tert-butyl ester (1502 mg, 5.19 mmol) was added into mixture of 3-Methyl-3-oxetanemethanol (583 mg, 5.71 mmol), EDC (1194 mg, 6.23 mmol), DMAP (63.4 mg, 0.519 mmol) in CH<sub>2</sub>Cl<sub>2</sub> CH<sub>2</sub>CL<sub>2</sub>(10 mL, 0.5 M). A colorless oil (1608 mg, 4.21 mmol, 81%) was obtained after column chromatography (Hexane:EA 100:0 to 80:20). <sup>1</sup>H NMR (400 MHz, CDCl<sub>3</sub>) δ 5.56 (d, *J* = 8.4 Hz, 1H), 4.54 – 4.42 (m, 3H), 4.40 (d, *J* = 6.1 Hz, 2H), 4.24 (d, *J* = 11.1 Hz, 1H), 4.14 (d, *J* = 11.1 Hz, 1H), 2.98 (dd, *J* = 16.8, 4.7 Hz, 1H), 2.85 (dd, *J* = 16.8, 4.8 Hz, 1H), 1.45 (s, 9H), 1.43 (s, 9H), 1.32 (s, 3H). <sup>13</sup>C NMR (101 MHz, CDCl<sub>3</sub>) δ 171.20 (C), 170.05 (C), 155.57 (C), 82.55 (C), 80.02 (C), 79.63 (C), 79.58 (CH<sub>2</sub>), 69.17 (CH<sub>2</sub>), 50.64 (CH), 39.19 (C), 37.11 (CH<sub>2</sub>), 28.45 (CH<sub>3</sub>), 28.04 (CH<sub>3</sub>), 21.19 (CH<sub>3</sub>). IR (KBr), ν/cm<sup>-1</sup> 3357, 2976, 2935, 2875, 1738, 1501, 1458, 1392, 1367, 1251, 1154, 984, 848. HRMS [M+H]<sup>+</sup> *m/z* calcd. for [C<sub>18</sub>H<sub>32</sub>O<sub>7</sub>N]<sup>+</sup> 374.2179, found 374.2173.

**(S)-1-tert-butyl 5-((3-methyloxetan-3-yl)methyl) 2-((tert-butoxycarbonyl)amino)pentanedioate (1p)**

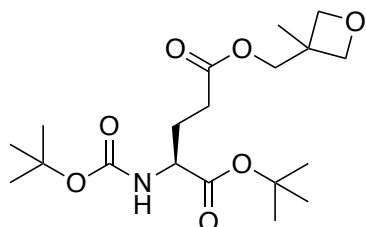

The general protocol was followed with N-Boc-L-glutamic acid 1-tert-butyl ester (3023 mg, 9.972 mmol) was added into mixture of 3-Methyl-3-oxetanemethanol (1120 mg, 10.96 mmol), EDC (2291 mg, 11.97 mmol), DMAP (121.8 mg, 0.9972 mmol) in CH<sub>2</sub>Cl<sub>2</sub> (18 mL, 0.25 M). A colorless oil (3287 mg, 8.476 mmol, 85%) was obtained after column chromatography (Hexane:EA 100:0 to 75:25). <sup>1</sup>H NMR (400 MHz, CDCl<sub>3</sub>) δ 5.10 (d, *J* = 8.1 Hz, 1H), 4.49 (d, *J* = 6.0 Hz, 2H), 4.37 (d, *J* = 6.0 Hz, 2H), 4.22 - 4.13 (m, 3H), 2.51 - 2.35 (m, 2H), 2.21 - 2.12 (m, 1H), 1.94 - 1.84 (m, 1H), 1.45 (s, 9H), 1.42 (s, 9H), 1.32 (s, 3H), peak at 4.85, 4.04 ppm due to minor rotamer. <sup>13</sup>C NMR (101 MHz, CDCl<sub>3</sub>) δ 173.03 (C), 171.42 (C), 155.53 (C), 82.36 (C), 79.92 (C), 79.66 (CH<sub>2</sub>), 68.98 (CH<sub>2</sub>), 53.40 (CH), 39.13 (C), 30.27 (CH<sub>2</sub>), 28.41 (CH<sub>3</sub>), 28.19 (CH<sub>2</sub>), 28.09 (CH<sub>3</sub>), 21.28 (CH<sub>3</sub>). IR (KBr), ν/cm<sup>-1</sup> 3361, 2976, 2935, 2874, 1739, 1716, 1517, 1455, 1392, 1367, 1251, 1156, 1050, 982. HRMS [M+H]<sup>+</sup> *m/z* calcd. for [C<sub>19</sub>H<sub>34</sub>O<sub>7</sub>N]<sup>+</sup> 388.2335, found 388.2328.

**(3-methyloxetan-3-yl)methyl 5-((3a*S*,4*S*,6a*R*)-2-oxohexahydro-1*H*-thieno[3,4-*d*]imidazol-4-yl)pentanoate (1q)**

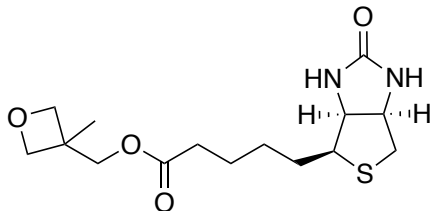

The general protocol was followed with biotin (219 mg, 0.896 mmol) was added into mixture of 3-Methyl-3-oxetanemethanol (100 mg, 0.986 mmol), EDC (220 mg, 1.08 mmol), DMAP (10.9 mg, 0.0896mmol) in CH<sub>2</sub>Cl<sub>2</sub> (9 mL, 0.1 M). A white solid (242 mg, 0.736 mmol, 82%) was obtained after column chromatography (CH<sub>2</sub>Cl<sub>2</sub>:Acetone 100:0 to 50:50). <sup>1</sup>H NMR (400 MHz, CDCl<sub>3</sub>) δ 6.10 (s, 1H), 5.54 (s, 1H), 4.61 – 4.42 (m, 3H), 4.37 (d, *J* = 6.0 Hz, 2H), 4.29 (app dd, *J* = 7.8, 4.6 Hz, 1H), 4.13 (s, 2H), 3.20 - 3.09 (m, 1H), 2.90 (dd, *J* = 12.8, 5.0 Hz, 1H), 2.72 (d, *J* = 12.8 Hz, 1H), 2.39 (t, *J* = 7.5 Hz, 2H), 1.85 – 1.61 (m, 4H), 1.54 – 1.38 (m, 2H), 1.32 (s, 3H). <sup>13</sup>C NMR (101 MHz, CDCl<sub>3</sub>) δ 173.91 (C), 163.68 (C), 79.65 (CH<sub>2</sub>), 68.53 (CH<sub>2</sub>), 62.04 (CH), 60.20 (CH), 55.58 (CH), 40.70 (CH<sub>2</sub>), 39.16 (C), 33.97 (CH<sub>2</sub>), 28.52 (CH<sub>2</sub>), 28.37 (CH<sub>2</sub>), 24.97 (CH<sub>2</sub>), 21.35 (CH<sub>3</sub>). IR (KBr), ν/cm<sup>-1</sup> 3214, 2931, 2871, 1735, 1702, 1461, 1269, 1170, 981, 634. HRMS [M+H]<sup>+</sup> *m/z* calcd. for [C<sub>15</sub>H<sub>25</sub>O<sub>4</sub>N<sub>2</sub>S]<sup>+</sup> 329.1535, found 329.1528.

**(R)-((3-methyloxetan-3-yl)methyl 4-((3*R*,5*R*,8*R*,9*S*,10*S*,13*R*,14*S*,17*R*)-3-hydroxy-10,13-dimethylhexadecahydro-1*H*-cyclopenta[*a*]phenanthren-17-yl)pentanoate (1r)**

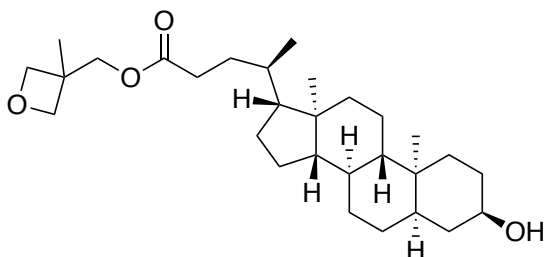

The general protocol was followed with lithocholic acid (203 mg, 0.537 mmol) was added into mixture of 3-Methyl-3-oxetanemethanol (220 mg, 2.15 mmol), EDC (124 mg, 0.65 mmol), DMAP (6.56 mg, 0.0537 mmol) in CH<sub>2</sub>Cl<sub>2</sub> (4.3 mL, 0.12 M). A white solid (243 mg, 0.526 mmol, 98%) was obtained after column chromatography (Hexane:Et<sub>2</sub>O 100:0 to 80:20). <sup>1</sup>H NMR (400 MHz, CDCl<sub>3</sub>) δ 4.52 (d, *J* = 5.9 Hz, 2H), 4.38 (d, *J* = 5.9 Hz, 2H), 4.15 (s, 2H), 3.69 - 3.56 (m, 1H), 2.40 (ddd, *J* = 15.4, 10.0, 5.1 Hz, 1H), 2.27 (ddd, *J* = 15.4, 9.4, 6.6 Hz, 1H), 2.00 - 1.92 (m, 1H), 1.90 - 0.95 (m, 29H), 0.98 - 0.88 (m, 6H), 0.63 (s, 3H). <sup>13</sup>C NMR (101 MHz, CDCl<sub>3</sub>) δ 174.55 (C), 79.76 (CH<sub>2</sub>), 71.99 (CH), 68.64 (CH<sub>2</sub>), 56.60 (CH), 56.03 (CH), 42.86 (CH<sub>2</sub>), 42.19 (CH), 40.52 (CH), 40.28 (C), 39.19 (C), 36.55 (C), 35.95 (CH), 35.48 (CH), 35.45 (CH<sub>2</sub>), 34.69 (CH<sub>2</sub>), 31.28 (CH<sub>2</sub>), 31.12 (CH<sub>2</sub>), 30.66 (CH<sub>2</sub>), 28.34 (CH<sub>2</sub>), 27.31 (CH<sub>2</sub>), 26.54 (CH<sub>2</sub>), 24.33 (CH<sub>2</sub>), 23.51 (CH<sub>3</sub>), 21.38 (CH<sub>3</sub>), 20.94 (CH<sub>2</sub>), 18.37 (CH<sub>3</sub>), 12.18 (CH<sub>3</sub>). IR (KBr), ν/cm<sup>-1</sup> 3412, 2934, 2866, 1738, 1450, 1377, 1247, 1163, 1034, 982, 736. HRMS [M+H]<sup>+</sup> *m/z* calcd. for [C<sub>29</sub>H<sub>49</sub>O<sub>4</sub>]<sup>+</sup> 461.1631, found 461.3625.

**(3-methyloxetan-3-yl)methyl 6-(1-((5-(trifluoromethyl)pyridin-2-yl)oxy)cyclopropanoate (1s)**

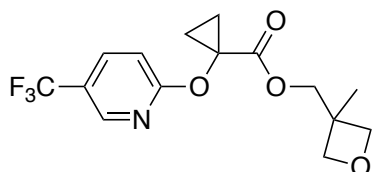

The general protocol was followed with 6-(1-((5-(trifluoromethyl)pyridin-2-yl)oxy)cyclopropanoic acid (241 mg, 1.02 mmol) was added into mixture of 3-Methyl-3-oxetanemethanol (114 mg, 1.12 mmol), EDC (233 mg, 1.22 mmol), DMAP (12.4 mg, 0.102 mmol) in CH<sub>2</sub>Cl<sub>2</sub> (5 mL, 0.2 M). A white solid (288 mg, 0.869 mmol, 89%) was obtained after column chromatography (CH<sub>2</sub>Cl<sub>2</sub>:MeOH 100:0 to 90:10). <sup>1</sup>H NMR (600 MHz, CDCl<sub>3</sub>) δ 8.45 - 8.41 (m, 1H), 7.81 (dd, *J* = 8.7, 2.4 Hz, 1H), 6.88 (app d, *J* = 8.7 Hz, 1H), 4.31 (d, *J* = 6.0 Hz, 2H), 4.22 (d, *J* = 6.0 Hz, 2H), 4.18 (s, 2H), 1.71 - 1.64 (m, 2H), 1.36 - 1.29 (m, 2H), 1.14 (s, 3H). <sup>13</sup>C NMR (101 MHz, CDCl<sub>3</sub>) δ 171.58 (C), 165.22 (C), 144.93 (q, *J*<sub>C-F</sub> = 43.7 Hz, CH), 136.17 (q, *J*<sub>C-F</sub> = 31.3 Hz, CH), 123.89 (q, *J*<sub>C-F</sub> = 269.7 Hz, C), 121.24 (q, *J*<sub>C-F</sub> = 33.0 Hz, C), 111.22 (CH), 79.33 (CH<sub>2</sub>), 69.39 (CH<sub>2</sub>), 57.97 (CH<sub>2</sub>), 39.21 (C), 20.93 (CH<sub>3</sub>), 16.77 (CH<sub>2</sub>). IR (KBr), ν/cm<sup>-1</sup> 3021, 2965, 2875, 1738, 1613, 1580, 1493, 1396, 1330, 1289, 1159, 1127, 1079, 984, 837. HRMS [M+H]<sup>+</sup> *m/z* calcd. for [C<sub>15</sub>H<sub>17</sub>O<sub>4</sub>NF<sub>3</sub>]<sup>+</sup> 332.1110, found 332.1102.

**(S)-(3-methyloxetan-3-yl)methyl 2-((tert-butoxycarbonyl)amino)-3-(pyridin-4-yl)propanoate (1r)**

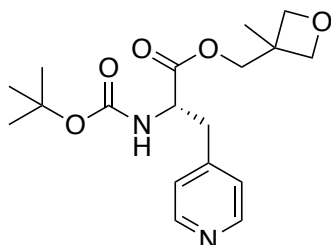

The general protocol was followed with (S)-2-((tert-butoxycarbonyl)amino)-3-(pyridin-4-yl)propanoic acid (236 mg, 0.899 mmol) was added into mixture of 3-Methyl-3-oxetanemethanol (101 mg, 0.989 mmol), EDC (207 mg, 1.08 mmol), DMAP (11.0 mg, 0.0899 mmol) in CH<sub>2</sub>Cl<sub>2</sub> (6.5 mL, 0.2 M). A white solid (267 mg, 0.761 mmol, 86%) was obtained after column chromatography (CH<sub>2</sub>Cl<sub>2</sub>:MeOH 100:0 to 95:5). <sup>1</sup>H NMR (400 MHz, CDCl<sub>3</sub>) δ 8.55 (app d, *J* = 6.1 Hz, 2H), 7.12 (app d, *J* = 6.1 Hz, 2H), 5.11 (d, *J* = 8.2 Hz, 1H), 4.74 - 4.50 (m, 1H), 4.42 (dd, *J* = 6.1, 2.5 Hz, 2H), 4.38 (dd, *J* = 6.1, 3.6 Hz, 2H), 4.26 (d, *J* = 11.1 Hz, 1H), 4.18 (d, *J* = 11.1 Hz, 1H), 3.16 (dd, *J* = 13.9, 6.2 Hz, 1H), 3.06 (dd, *J* = 13.9, 6.8 Hz, 1H), 1.43 (s, 9H), 1.28 (s, 3H). <sup>13</sup>C NMR (101 MHz, CDCl<sub>3</sub>) δ 171.70 (C), 155.06 (C), 150.04 (CH), 145.32 (C), 124.61 (CH), 80.49 (C), 79.44 (CH<sub>2</sub>), 69.99 (CH<sub>2</sub>), 53.84 (CH), 39.07 (CH<sub>2</sub>), 38.02 (C), 28.36 (CH<sub>3</sub>), 21.07 (CH<sub>3</sub>). IR (KBr), ν/cm<sup>-1</sup> 3194, 2972, 2874, 1745, 1710, 1604, 1539, 1366, 1274, 1250, 1216, 1168, 980. HRMS [M+H]<sup>+</sup> *m/z* calcd. for [C<sub>18</sub>H<sub>27</sub>O<sub>5</sub>N<sub>2</sub>]<sup>+</sup> 351.1920, found 351.1912.

**(3-methyloxetan-3-yl)methyl 2-(1-phenyl-5-(trifluoromethyl)-1H-pyrazol-4-yl)acetate (1u)**

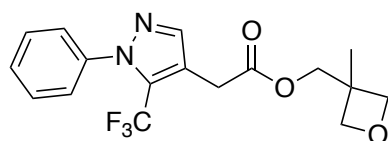

The general protocol was followed with (1-phenyl-5-trifluoromethyl-1H-pyrazol-4-yl)-acetic acid (250 mg, 0.927 mmol) was added into mixture of 3-Methyl-3-oxetanemethanol (104 mg, 1.02 mmol), EDC (213 mg, 1.11 mmol), DMAP (11.3 mg, 0.0927 mmol) in CH<sub>2</sub>Cl<sub>2</sub> (4.6 mL, 0.2 M). A colorless oil (285 mg, 0.805 mmol, 87%) was obtained after column chromatography (CH<sub>2</sub>Cl<sub>2</sub>:MeOH 100:0 to

90:10).  $^1\text{H}$  NMR (400 MHz,  $\text{CDCl}_3$ )  $\delta$  7.68 (s, 1H), 7.54 – 7.36 (m, 5H), 4.50 (d,  $J = 6.0$  Hz, 2H), 4.39 (d,  $J = 6.0$  Hz, 2H), 4.25 (s, 2H), 3.76 (s, 2H), 1.32 (s, 3H).  $^{13}\text{C}$  NMR (101 MHz,  $\text{CDCl}_3$ )  $\delta$  170.39 (C), 141.19 (CH), 139.48 (C), 129.95 (q,  $J_{\text{C-F}} = 37.6$  Hz, C), 129.37 (CH), 129.15 (CH), 126.08 (CH), 120.31 (q,  $J_{\text{C-F}} = 268.2$  Hz, C), 116.33 (C), 79.56 ( $\text{CH}_2$ ), 69.58 ( $\text{CH}_2$ ), 39.18 (C), 29.98 ( $\text{CH}_2$ ), 21.18 ( $\text{CH}_3$ ). IR (KBr),  $\nu/\text{cm}^{-1}$  3066, 2965, 2876, 1743, 1598, 1504, 1473, 1399, 1311, 1247, 1183, 1092, 1058, 975, 769, 695. HRMS  $[\text{M}+\text{H}]^+$   $m/z$  calcd. for  $[\text{C}_{17}\text{H}_{18}\text{O}_3\text{N}_2\text{F}_3]^+$  355.1270, found 355.1265.

**(2S,3S)-1-tert-butyl 2-((3-methyloxetan-3-yl)methyl) 3-(pyridin-4-ylmethyl)pyrrolidine-1,2-dicarboxylate (1v)**

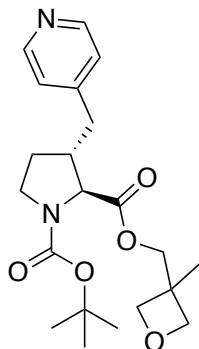

The general protocol was followed with (2S,3S)-1-[(2-methylpropan-2-yl)oxycarbonyl]-3-(pyridin-4-ylmethyl)pyrrolidine-2-carboxylic acid (248 mg, 0.81 mmol) was added into mixture of 3-Methyl-3-oxetanemethanol (91 mg, 0.89 mmol), EDC (186 mg, 0.97 mmol), DMAP (10 mg, 0.081 mmol) in  $\text{CH}_2\text{Cl}_2$  (4 mL, 0.2 M). A colorless oil (276 mg, 0.70 mmol, 87%) was obtained after column chromatography ( $\text{CH}_2\text{Cl}_2$ :MeOH 100:0 to 95:5). Two rotmers:  $^1\text{H}$  NMR (400 MHz,  $\text{CDCl}_3$ )  $\delta$  8.54 (app dd,  $J = 6.0, 1.5$  Hz, 4H), 8.52 (app dd,  $J = 6.0, 1.5$  Hz, 4H), 7.13 (app dd,  $J = 6.0, 1.5$  Hz, 2H), 7.11 (app dd,  $J = 6.0, 1.5$  Hz, 2H), 4.54 – 4.44 (m, 4H), 4.40 (d,  $J = 6.0$  Hz, 2H), 4.37 (d,  $J = 6.0$  Hz, 2H), 4.26 (d,  $J = 11.2$  Hz, 1H), 4.21 (s, 1H), 4.21 (s, 1H), 4.15 (d,  $J = 11.1$  Hz, 1H), 4.08 (d,  $J = 5.0$  Hz, 1H), 3.98 (d,  $J = 5.1$  Hz, 1H), 3.68 – 3.41 (m, 4H), 2.98 - 2.92 (m, 2H), 2.69 - 2.55 (m, 4H), 2.02 - 1.93 (m, 2H), 1.68 - 1.58 (m, 2H), 1.45 (s, 9H), 1.41 (s, 9H), 1.32 (s, 3H), 1.31 (s, 3H).  $^{13}\text{C}$  NMR (101 MHz,  $\text{CDCl}_3$ )  $\delta$  172.69 (C), 172.47 (C), 154.41 (C), 153.79 (C), 150.14 (CH), 150.08 (CH), 148.08 (C), 148.01 (C), 124.42 (CH), 124.33 (CH), 80.49 (C), 80.30 (C), 79.53 ( $\text{CH}_2$ ), 79.51 ( $\text{CH}_2$ ), 79.43 ( $\text{CH}_2$ ), 79.40 ( $\text{CH}_2$ ), 69.22 ( $\text{CH}_2$ ), 69.05 ( $\text{CH}_2$ ), 64.15 (CH), 63.82 (CH), 45.66 ( $\text{CH}_2$ ), 45.40 ( $\text{CH}_2$ ), 45.19 (CH), 44.11 (CH), 39.34 (C), 39.31 (C), 38.60 ( $\text{CH}_2$ ), 38.57 ( $\text{CH}_2$ ), 29.91 ( $\text{CH}_2$ ), 29.22 ( $\text{CH}_2$ ), 28.54 ( $\text{CH}_3$ ), 28.47 ( $\text{CH}_3$ ), 21.27 ( $\text{CH}_3$ ), 21.25 ( $\text{CH}_3$ ). IR (KBr),  $\nu/\text{cm}^{-1}$  3069, 2971, 2935, 2873, 1793, 1750, 1699, 1602, 1456, 1385, 1255, 1166, 1126, 982. HRMS  $[\text{M}+\text{H}]^+$   $m/z$  calcd. for  $[\text{C}_{21}\text{H}_{31}\text{O}_5\text{N}_2]^+$  391.2233, found 391.2224.

**5,5-difluoro-7,9-dimethyl-3-(3-((3-methyloxetan-3-yl)methoxy)-3-oxopropyl)-5H-dipyrrolo[1,2-c:2',1'-f][1,3,2]diazaborinin-4-ium-5-uide (1w)**

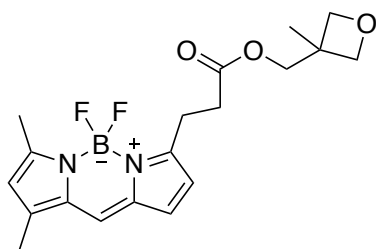

The general protocol was followed with BODIPY-FL propionic acid (69 mg, 0.24 mmol) was added into mixture of 3-Methyl-3-oxetanemethanol (29 mg, 0.28 mmol), EDC (55 mg, 0.28 mmol), DMAP (3.0 mg, 0.024 mmol) in  $\text{CH}_2\text{Cl}_2$  (4.8 mL, 0.05 M). An orange solid (90 mg, 0.24 mmol, 100%) was obtained after column chromatography ( $\text{CH}_2\text{Cl}_2$ :MeOH 100:0 to 99:1).  $^1\text{H}$  NMR (600 MHz,  $\text{CDCl}_3$ )  $\delta$  7.08 (s, 1H), 6.88 (d,  $J = 4.0$  Hz, 1H), 6.27 (d,  $J = 4.0$  Hz, 1H), 6.12 (s, 1H), 4.48 (d,  $J = 6.0$  Hz, 2H), 4.35 (d,  $J = 6.0$  Hz, 2H), 4.20 (s, 2H), 3.31 (app t,  $J = 7.5$  Hz, 2H), 2.82 (app t,  $J = 7.5$  Hz, 2H), 2.56 (s, 3H), 2.25 (s, 3H), 1.31 (s, 3H).  $^{13}\text{C}$  NMR (101 MHz,  $\text{CDCl}_3$ )  $\delta$  172.69 (C), 160.70 (C), 156.78 (C), 144.11 (C), 135.36 (C), 133.33 (C), 128.06 (CH), 123.96 (CH), 120.61 (CH), 116.55 (CH), 79.72 ( $\text{CH}_2$ ), 69.05 ( $\text{CH}_2$ ), 39.12 (C), 33.34 ( $\text{CH}_2$ ), 23.99 ( $\text{CH}_2$ ), 21.24 ( $\text{CH}_3$ ), 15.08 ( $\text{CH}_3$ ), 11.43 ( $\text{CH}_3$ ). IR (KBr),  $\nu/\text{cm}^{-1}$  3107, 3063, 2962, 2934, 2873, 1734, 1607, 1529, 1489, 1251, 1173, 1135, 1085, 974, 668. HRMS  $[\text{M}+\text{H}]^+$   $m/z$  calcd. for  $[\text{C}_{19}\text{H}_{24}\text{O}_3\text{N}_2\text{F}_2\text{B}]^+$  377.1848, found 377.1831.

**(3-methyloxetan-3-yl)methyl benzoate (1x)**

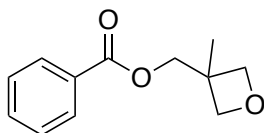

The general protocol was followed with benzoic acid (1730 mg, 14.17 mmol) was added into mixture of 3-Methyl-3-oxetanemethanol (1560  $\mu\text{L}$ , 15.59 mmol), EDC (3281 mg, 17.11 mmol), DMAP (171.1 mg, 1.417 mmol) in  $\text{CH}_2\text{Cl}_2$  (28 mL, 0.5 M). A colorless oil (2804 mg, 13.57 mmol, 96%) was obtained after column chromatography (Hexane:EA 10:0 to 8:2).  $^1\text{H}$  NMR (400 MHz,  $\text{CDCl}_3$ )  $\delta$  8.33 – 7.98 (m, 2H), 7.81 – 7.52 (m, 1H), 7.53 – 7.26 (m, 2H), 4.65 (d,  $J = 6.0$  Hz, 2H), 4.46 (d,  $J = 6.0$  Hz, 2H), 4.39 (s, 2H), 1.42 (s, 3H).  $^{13}\text{C}$  NMR (101 MHz,  $\text{CDCl}_3$ )  $\delta$  166.59 (C), 133.25 (CH), 129.93 (C), 129.69 (CH), 128.54 (CH), 79.68 ( $\text{CH}_2$ ), 69.06 ( $\text{CH}_2$ ), 39.35 (C), 21.36 ( $\text{CH}_3$ ). IR (KBr),  $\nu/\text{cm}^{-1}$  3064, 3035, 2963, 2872, 1718, 1602, 1452, 1315, 1282, 1113, 983, 712. HRMS  $[\text{M}+\text{H}]^+$   $m/z$  calcd. for  $[\text{C}_{11}\text{H}_{14}\text{O}_3\text{N}]^+$  207.1021, found 207.1014.

**(3-methyloxetan-3-yl)methyl 2-fluoro benzoate (1y)**

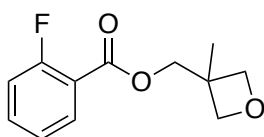

The general protocol was followed with 2-fluorobenzoic acid (1242 mg, 8.87 mmol) was added into mixture of 3-Methyl-3-oxetanemethanol (823 mg, 8.06 mmol), EDC (1854 mg, 9.67 mmol), DMAP (105 mg, 0.806 mmol) in  $\text{CH}_2\text{Cl}_2$  (17 mL, 0.5 M). A colorless oil (1889 mg, 8.43 mmol, 95%) was obtained after column chromatography (Hexane:EA 10:0 to 9:1).  $^1\text{H}$  NMR (400 MHz,  $\text{CDCl}_3$ )  $\delta$  7.95 (td,  $J = 7.5, 1.9$  Hz, 1H), 7.52 (m, 1H), 7.21 (td,  $J = 7.6, 1.1$  Hz, 1H), 7.13 (m, 1H), 4.61 (d,  $J = 6.0$  Hz, 2H), 4.44 (d,  $J = 6.0$  Hz, 2H), 4.41 (s, 2H), 1.42 (s, 3H).  $^{13}\text{C}$  NMR (101 MHz,  $\text{CDCl}_3$ )  $\delta$  164.60 (d,  $J_{\text{C-F}} = 3.9$  Hz, C), 162.10 (d,  $J_{\text{C-F}} = 258.7$  Hz, C), 134.82 (d,  $J_{\text{C-F}} = 9.0$  Hz, CH), 132.24 (CH), 124.14 (d,  $J_{\text{C-F}} = 3.9$  Hz, CH), 118.50 (d,  $J_{\text{C-F}} = 10.2$  Hz, C), 117.16 (d,  $J_{\text{C-F}} = 22.2$  Hz, CH), 79.67 ( $\text{CH}_2$ ), 69.58 ( $\text{CH}_2$ ), 39.30 (C), 21.32 ( $\text{CH}_3$ ). HRMS  $[\text{M}+\text{H}]^+$   $m/z$  calcd. for  $[\text{C}_{12}\text{H}_{14}\text{O}_3\text{F}]^+$  225.0927, found 225.0918.

## General protocol A for the one-pot synthesis of tetrazine thioethers (R=alkyl)

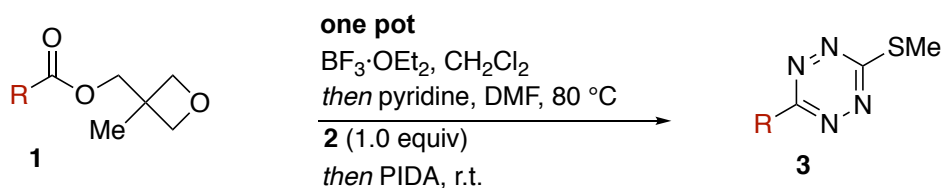

A dry round-bottom flask was charged with the oxetane ester **1** (1.0 equiv.) and a magnetic stirbar. The flask was outfitted with a septum-fitted gas inlet adapter, evacuated and refilled with nitrogen. Anhydrous CH<sub>2</sub>Cl<sub>2</sub> (to 1.0 M in oxetane ester) was added via syringe and the resulting solution was cooled by an ice/brine bath (–12 °C) and boron trifluoride etherate (0.50–1.5 equiv.) was added via syringe. The resulting mixture was allowed to stir under nitrogen with continued cooling by the cold bath (maintained between –12 °C to –4 °C) for 3–6 h. The reactions were monitored by TLC of aliquots that were quenched with trimethylamine before spotting the TLC plate. When the oxetane was completely consumed, the reaction mixture was quenched with pyridine (2.0–3.0 equiv.), and then **2** (0.70–0.80 equiv.) and DMF (to 1.0 M in **2**) were added. The mixture was stirred vigorously and vacuum was carefully applied to remove CH<sub>2</sub>Cl<sub>2</sub>. The resulting mixture was then heated by an oil bath at 80 °C and the mixture was allowed to stir under nitrogen at 80 °C for 20–30 min. After cooling to r.t., PIDA (0.70–0.80 equiv.) was added to the flask and the mixture allowed to stir at r.t. for 30 min. The mixture was diluted with CH<sub>2</sub>Cl<sub>2</sub> and sequentially washed with saturated sodium bicarbonate, water and brine, dried over sodium sulfate and concentrated by rotary evaporation. The residue was purified by flash column chromatography on silica gel.

## General protocol B for the one-pot synthesis of tetrazine thioethers (R = aryl)

A dry round-bottom flask was charged with the oxetane ester (1.0 equiv.) and a magnetic stirbar. The flask was outfitted with a septum-fitted gas inlet adapter, evacuated and refilled with nitrogen. Anhydrous CH<sub>2</sub>Cl<sub>2</sub> (to 1.0 M in oxetane ester) was added via syringe and the resulting solution was cooled by an ice/brine bath (–5 °C) and boron trifluoride etherate (0.50–1.5 equiv.) was added via syringe. The resulting mixture was allowed to stir under nitrogen with continued cooling by the cold bath (maintained between –5 °C to –0 °C) for 3–6 h. The reactions were monitored by TLC of aliquots that were quenched with trimethylamine before spotting the TLC plate. When the oxetane was completely consumed, the reaction mixture was quenched with pyridine (2.0–3.0 equiv.), and then **2** (0.70 equiv.) and DMF (to 1.0 M in **2**) were added. The mixture was stirred vigorously and vacuum was carefully applied to remove CH<sub>2</sub>Cl<sub>2</sub>. The resulting mixture was then heated by an oil bath at 80 °C and the mixture was allowed to stir under nitrogen at 80 °C for 1–2 h. After cooling to r.t., PIDA (0.70 equiv.) was added to the flask and the mixture allowed to stir at r.t. for 1 h. The mixture was diluted with CH<sub>2</sub>Cl<sub>2</sub> and sequentially washed with saturated sodium bicarbonate, water and brine, dried over sodium sulfate and concentrated by rotary evaporation. The residue was purified by flash column chromatography on silica gel.

## General protocol C for the one-pot synthesis of tetrazine thioethers (R = 4-pyridyl or 3-methoxy-2-pyridyl)

A dry round-bottom flask was charged with the oxetane ester (1.0 equiv.) and a magnetic stirbar. The flask was outfitted with a septum-fitted gas inlet adapter, evacuated and refilled with nitrogen. Anhydrous CH<sub>2</sub>Cl<sub>2</sub> (to 1.0 M in oxetane ester) was added via syringe and the resulting solution was cooled by an ice/brine bath (–0 °C) and boron trifluoride etherate (1.2 equiv.) was added via syringe. The resulting mixture was allowed to stir under nitrogen with continued cooling by the cold bath for 2 h, followed by stirring for 12 h at r.t. The reactions were monitored by TLC of aliquots that were quenched with trimethylamine before spotting the TLC plate. When the oxetane was completely consumed, the reaction mixture was quenched with pyridine (3.0 equiv.), and then **2** (0.70 equiv.) and DMF (to 1.0 M in **2**) were added. The mixture was stirred vigorously and vacuum was carefully applied to remove CH<sub>2</sub>Cl<sub>2</sub>. The resulting mixture was then heated by an oil bath at 80 °C and the mixture was allowed to stir for 2 h. After cooling to r.t., PIDA (0.70 equiv.) was added to the flask and the mixture allowed to stir at r.t. for 2 h. The mixture was diluted with CH<sub>2</sub>Cl<sub>2</sub> and sequentially washed with saturated sodium bicarbonate, water and brine, dried over sodium sulfate and concentrated by rotary evaporation. The residue was purified by flash column chromatography on silica gel.

### 3-((benzyloxy)methyl)-6-(methylthio)-1,2,4,5-tetrazine (3a)

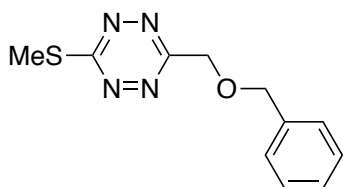

General protocol A was followed using  $\text{BF}_3 \cdot \text{OEt}_2$  (222  $\mu\text{L}$ , 1.81 mmol), **1a** (905 mg, 3.62 mmol),  $\text{CH}_2\text{Cl}_2$  (3.6 mL) for 4 h at  $-12^\circ\text{C}$  to  $-4^\circ\text{C}$ ; Pyridine (580  $\mu\text{L}$ , 7.24 mmol), **2** (714 mg, 2.90 mmol) and DMF (2.9 mL) for 20 min at  $80^\circ\text{C}$ ; and PIDA (930 mg, 2.91 mmol) at r.t. for 30 min. A red oil (336 mg, 1.35 mmol, 70%) was obtained after chromatography (hexane:acetone 100:0 to 98:2).  $^1\text{H}$  NMR (400 MHz,  $\text{CDCl}_3$ )  $\delta$  7.47 – 7.27 (m, 5H), 5.05 (s, 2H), 4.77 (s, 2H), 2.74 (s, 3H).  $^{13}\text{C}$  NMR (101 MHz,  $\text{CDCl}_3$ )  $\delta$  176.87 (C), 164.33 (C), 137.15 (C), 128.69 (CH), 128.23 (CH), 128.21 (CH), 73.78 ( $\text{CH}_2$ ), 69.63 ( $\text{CH}_2$ ), 13.54 ( $\text{CH}_3$ ). IR (KBr),  $\nu/\text{cm}^{-1}$  3063, 3030, 2930, 2863, 1454, 1327, 1305, 1163, 1098, 893, 740, 699. HRMS  $[\text{M}+\text{H}]^+$   $m/z$  calcd. for  $[\text{C}_{11}\text{H}_{13}\text{ON}_4\text{S}]^+$  249.0810, found 249.0802

**tert-butyl (4-(6-(methylthio)-1,2,4,5-tetrazin-3-yl)phenyl)carbamate (3b)**

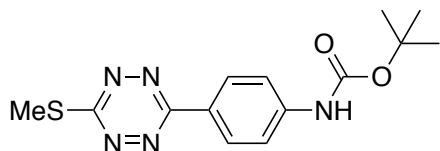

General protocol B was followed using  $\text{BF}_3 \cdot \text{OEt}_2$  (85.2  $\mu\text{L}$ , 0.692 mmol), **1b** (442 mg, 1.38 mmol),  $\text{CH}_2\text{Cl}_2$  (1.38 mL) for 4 h at  $-2^\circ\text{C}$  to  $-0^\circ\text{C}$ ; Pyridine (222  $\mu\text{L}$ , 2.77 mmol), **2** (240 mg, 0.969 mmol) and DMF (0.82 mL) for 2 h at  $80^\circ\text{C}$ ; and PIDA (267 mg, 0.969 mmol) at r.t. for 1 h. A red solid (245 mg, 0.767 mmol, 56%) was obtained after purified by chromatography (Hexane: $\text{Et}_2\text{O}$  100:0 to 85:15).  $^1\text{H}$  NMR (400 MHz,  $\text{CDCl}_3$ )  $\delta$  8.47 (app d,  $J = 8.8$  Hz, 2H), 7.58 (app d,  $J = 8.6$  Hz, 2H), 6.71 (s, 1H), 2.78 (s, 3H), 1.55 (s, 9H).  $^{13}\text{C}$  NMR (101 MHz,  $\text{CDCl}_3$ )  $\delta$  174.73 (C), 162.02 (C), 152.34 (C), 142.41 (C), 128.74 (CH), 125.92 (C), 118.51 (CH), 81.45 (C), 28.43 ( $\text{CH}_3$ ), 13.59 ( $\text{CH}_3$ ). IR (KBr),  $\nu/\text{cm}^{-1}$  3368, 3100, 3007, 2980, 2964, 2928, 1708, 1592, 1526, 1510, 1361, 1312, 1244, 1171, 1053, 853. HRMS  $[\text{M}+\text{H}]^+$   $m/z$  calcd. for  $[\text{C}_{14}\text{H}_{18}\text{O}_2\text{N}_5\text{S}]^+$  320.1181, found 320.1167.

**tert-butyl 4-(6-(methylthio)-1,2,4,5-tetrazin-3-yl)benzylcarbamate (3c)**

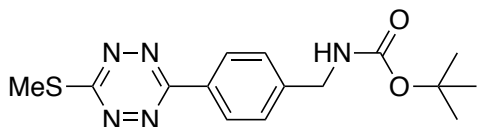

General protocol B was followed using  $\text{BF}_3 \cdot \text{OEt}_2$  (165  $\mu\text{L}$ , 1.33 mmol), **1c** (892 mg, 2.66 mmol),  $\text{CH}_2\text{Cl}_2$  (2.7 mL) for 4 h at  $-5^\circ\text{C}$  to  $0^\circ\text{C}$ ; Pyridine (430  $\mu\text{L}$ , 5.32 mmol), **2** (462 mg, 1.86 mmol) and DMF (2.2 mL) for 1.5 h at  $80^\circ\text{C}$ ; and PIDA (599 mg, 1.86 mmol) at r.t. for 1 h. A red solid (403 mg, 1.21 mmol, 65%) was obtained after purified by chromatography ( $\text{CH}_2\text{Cl}_2$ :acetone 100:0 to 97:3).  $^1\text{H}$  NMR (600 MHz,  $\text{CDCl}_3$ )  $\delta$  8.49 (app d,  $J = 8.4$  Hz, 2H), 7.49 (app d,  $J = 8.4$  Hz, 2H), 4.95 (s, 1H), 4.43 (d,  $J = 6.1$  Hz, 2H), 2.79 (s, 3H), 1.48 (s, 9H).  $^{13}\text{C}$  NMR (101 MHz,  $\text{CDCl}_3$ )  $\delta$  175.36 (C), 162.23 (C), 156.05 (C), 143.78 (C), 130.72 (C), 128.22 (CH), 127.89 (CH), 79.97 (C), 44.52 ( $\text{CH}_2$ ), 28.54 ( $\text{CH}_3$ ), 13.59 ( $\text{CH}_3$ ). IR (KBr),  $\nu/\text{cm}^{-1}$  3352, 3021, 2974, 2930, 1684, 1512, 1355, 1249, 1195, 1166, 1051, 894. HRMS  $[\text{M}+\text{H}]^+$   $m/z$  calcd. for  $[\text{C}_{15}\text{H}_{20}\text{O}_2\text{N}_5\text{S}]^+$  334.1338, found 334.1323.

**3-(methylthio)-6-(4-nitrophenyl)-1,2,4,5-tetrazine (3d)**

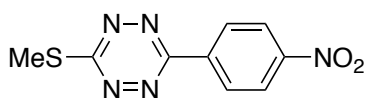

General protocol B was followed using  $\text{BF}_3 \cdot \text{OEt}_2$  (54  $\mu\text{L}$ , 0.54 mmol), **1d** (271 mg, 1.1 mmol),  $\text{CH}_2\text{Cl}_2$  (1.1 mL) for 6 h at  $0^\circ\text{C}$ ; Pyridine (174  $\mu\text{L}$ , 1.1 mmol), **2** (187 mg, 0.76 mmol) and DMF (0.76 mL) for 2 h at  $80^\circ\text{C}$ ; and PIDA (254 mg, 0.76 mmol) at r.t. for 1 h. A red solid (126 mg, 0.51 mmol, 67%) was obtained after purified by chromatography (Hexane: $\text{CH}_2\text{Cl}_2$  7:3 to 1:1).  $^1\text{H}$  NMR (400 MHz,  $\text{CDCl}_3$ )  $\delta$  8.73 (app d,  $J = 9.0$  Hz, 2H), 8.43 (app d,  $J = 9.0$  Hz, 2H), 2.83 (s, 3H).  $^{13}\text{C}$  NMR (101 MHz,  $\text{CDCl}_3$ )  $\delta$  176.67 (C), 160.99 (C), 150.26 (C), 137.52 (C), 128.44 (CH), 124.54 (CH), 13.71 ( $\text{CH}_3$ ). IR (KBr),  $\nu/\text{cm}^{-1}$  3079, 2926, 1604, 1516, 1342, 1193, 871. HRMS  $[\text{M}+\text{H}]^+$   $m/z$  calcd. for  $[\text{C}_9\text{H}_8\text{O}_2\text{N}_5\text{S}]^+$  250.0399, found 250.0389.

**3-(4-methoxyphenyl)-6-(methylthio)-1,2,4,5-tetrazine (3e)**

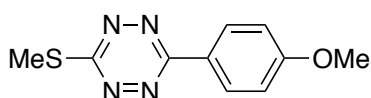

General protocol B was followed using  $\text{BF}_3 \cdot \text{OEt}_2$  (79  $\mu\text{L}$ , 0.64 mmol), **1e** (302 mg, 1.3 mmol),  $\text{CH}_2\text{Cl}_2$  (1.3 mL) for 4 h at  $-5^\circ\text{C}$  to  $0^\circ\text{C}$ ; Pyridine (207  $\mu\text{L}$ , 2.6 mmol), **2** (222 mg, 0.89 mmol) and DMF (0.9 mL) for 2 h at  $80^\circ\text{C}$ ; and PIDA (289 mg, 0.89 mmol) at r.t. for 1 h. A red solid (143 mg, 0.62 mmol, 69%) was obtained after purified by chromatography (Hexane:EA 10:0 to 9:1).  $^1\text{H}$  NMR (400 MHz,  $\text{CDCl}_3$ )  $\delta$  8.48 (app d,  $J = 9.0$  Hz, 2H), 7.07 (app d,  $J = 9.0$  Hz, 2H), 3.91 (s, 3H), 2.78 (s, 3H).  $^{13}\text{C}$  NMR (101 MHz,  $\text{CDCl}_3$ )  $\delta$  174.50 (C), 163.20 (C), 162.19 (C), 129.42 (CH), 124.08 (C), 114.83 (CH), 55.65 ( $\text{CH}_3$ ), 13.57 ( $\text{CH}_3$ ). IR (KBr),  $\nu/\text{cm}^{-1}$  3003, 2936, 2838, 1603, 1513, 1424, 1353, 1252, 1192, 1037, 846. HRMS  $[\text{M}+\text{H}]^+$   $m/z$  calcd. for  $[\text{C}_{10}\text{H}_{11}\text{ON}_4\text{S}]^+$  235.0654, found 230.0645.

### 3-(4-bromophenyl)-6-(methylthio)-1,2,4,5-tetrazine (**3f**)

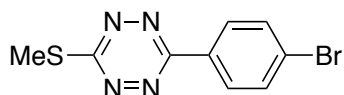

General protocol B was followed using  $\text{BF}_3 \cdot \text{OEt}_2$  (67  $\mu\text{L}$ , 0.54 mmol), **1f** (305 mg, 1.1 mmol),  $\text{CH}_2\text{Cl}_2$  (1.1 mL) for 4 h at  $-2^\circ\text{C}$  to  $0^\circ\text{C}$ ; Pyridine (173  $\mu\text{L}$ , 1.1 mmol), **2** (186 mg, 0.75 mmol) and DMF (0.75 mL) for 2 h at  $80^\circ\text{C}$ ; and PIDA (242 mg, 0.75 mmol) at r.t. for 1 h. A red solid (115 mg, 0.41 mmol, 54%) was obtained after purified by chromatography (Hexane:EA 100:0 to 95:5).  $^1\text{H}$  NMR (400 MHz,  $\text{CDCl}_3$ )  $\delta$  8.40 (app d,  $J = 8.6$  Hz, 2H), 7.72 (app d,  $J = 8.6$  Hz, 2H), 2.80 (s, 3H).  $^{13}\text{C}$  NMR (101 MHz,  $\text{CDCl}_3$ )  $\delta$  175.72 (C), 161.87 (C), 132.73 (CH), 130.67 (C), 129.01 (CH), 127.51 (C), 13.63 ( $\text{CH}_3$ ). IR (KBr),  $\nu/\text{cm}^{-1}$  3093, 2924, 1585, 1355, 1194, 1004, 800. HRMS  $[\text{M}+\text{H}]^+$   $m/z$  calcd. for  $[\text{C}_9\text{H}_8\text{N}_4\text{SBr}]^+$  282.9653, found 282.9643.

### methyl 4-(6-(methylthio)-1,2,4,5-tetrazin-3-yl)benzoate (**3g**)

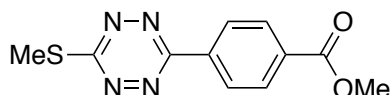

General protocol B was followed using  $\text{BF}_3 \cdot \text{OEt}_2$  (116  $\mu\text{L}$ , 0.938 mmol), **1g** (248 mg, 0.938 mmol),  $\text{CH}_2\text{Cl}_2$  (0.94 mL) for 4 h at  $0^\circ\text{C}$ ; Pyridine (190  $\mu\text{L}$ , 2.36 mmol), **2** (165 mg, 0.657 mmol) and DMF (0.66 mL) for 2 h at  $80^\circ\text{C}$ ; and PIDA (213 mg, 0.657 mmol) at r.t. for 1 h. A red solid (135 mg, 0.514 mmol, 79%) was obtained after purified by chromatography (Hexane:  $\text{CH}_2\text{Cl}_2$  1:1 to 3:7).  $^1\text{H}$  NMR (600 MHz,  $\text{CDCl}_3$ )  $\delta$  8.61 (app d,  $J = 8.5$  Hz, 2H), 8.24 (app d,  $J = 8.5$  Hz, 2H), 3.98 (s, 3H), 2.81 (s, 3H).  $^{13}\text{C}$  NMR (101 MHz,  $\text{CDCl}_3$ )  $\delta$  176.04 (C), 166.52 (C), 161.82 (C), 135.72 (C), 133.43 (C), 130.51 (CH), 127.50 (CH), 52.63 ( $\text{CH}_3$ ), 13.65 ( $\text{CH}_3$ ). IR (KBr),  $\nu/\text{cm}^{-1}$  3060, 2994, 2945, 1713, 1355, 1276, 1190, 1111, 768. HRMS  $[\text{M}+\text{H}]^+$   $m/z$  calcd. for  $[\text{C}_{11}\text{H}_{11}\text{O}_2\text{N}_4\text{S}]^+$  263.0603, found 263.0593

### 4-(6-(methylthio)-1,2,4,5-tetrazin-3-yl)benzonitrile (**3h**)

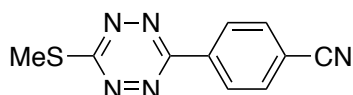

General protocol B was followed using  $\text{BF}_3 \cdot \text{OEt}_2$  (162  $\mu\text{L}$ , 1.31 mmol), **1h** (300 mg, 1.31 mmol),  $\text{CH}_2\text{Cl}_2$  (1.3 mL) for 6 h at  $0^\circ\text{C}$ ; Pyridine (212  $\mu\text{L}$ , 2.63 mmol), **2** (227 mg, 0.917 mmol) and DMF (0.9 mL) for 2 h at  $80^\circ\text{C}$ ; and PIDA (296 mg, 0.917 mmol) at r.t. for 1 h. A red solid (140 mg, 0.611 mmol, 67%) was obtained after purified by chromatography (Hexane:EA 9:1 to 8:2).  $^1\text{H}$  NMR (600 MHz,  $\text{CDCl}_3$ )  $\delta$  8.61 (app d,  $J = 8.5$  Hz, 2H), 8.24 (app d,  $J = 8.5$  Hz, 2H), 3.98 (s, 3H), 2.81 (s, 3H).  $^{13}\text{C}$  NMR (101 MHz,  $\text{CDCl}_3$ )  $\delta$  176.53 (C), 161.17 (C), 135.87 (C), 133.12 (CH), 127.94 (CH), 118.32 (C), 115.78 (C), 13.69 ( $\text{CH}_3$ ). IR (KBr),  $\nu/\text{cm}^{-1}$  3096, 2923, 2852, 2227, 1653, 1394, 853. HRMS  $[\text{M}+\text{H}]^+$   $m/z$  calcd. for  $[\text{C}_{10}\text{H}_8\text{N}_5\text{S}]^+$  230.0500, found 230.0493

### 3-(6-methoxypyridin-2-yl)-6-(methylthio)-1,2,4,5-tetrazine (**3i**)

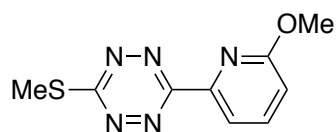

General protocol B was followed using  $\text{BF}_3 \cdot \text{OEt}_2$  (190  $\mu\text{L}$ , 1.54 mmol), **1i** (305 mg, 1.29 mmol),  $\text{CH}_2\text{Cl}_2$  (1.3 mL) for 2 h at  $0^\circ\text{C}$  followed by 12 h at r.t.; Pyridine (310  $\mu\text{L}$ , 3.84 mmol), **2** (223 mg, 0.903 mmol) and DMF (0.9 mL) for 2 h at  $80^\circ\text{C}$ ; and PIDA (290 mg, 0.903 mmol) at r.t. for 2 h. A red solid (128 mg, 61%) was obtained after purified by chromatography (Hexane: $\text{CH}_2\text{Cl}_2$  1:1 to 3:7).  $^1\text{H}$  NMR (400 MHz,  $\text{CDCl}_3$ )  $\delta$  8.16 (dd,  $J = 7.4, 0.8$  Hz, 1H), 7.80 (dd,  $J = 8.3, 7.4$  Hz, 1H), 6.98 (dd,  $J = 8.3, 0.8$  Hz, 1H), 4.10 (s, 3H), 2.81 (s, 3H).  $^{13}\text{C}$  NMR (101 MHz,  $\text{CDCl}_3$ )  $\delta$  176.05 (C), 164.74 (C), 162.04 (C), 147.69 (C), 139.58 (CH), 117.10 (CH), 114.52 (CH),

53.94 (CH<sub>3</sub>), 13.63 (CH<sub>3</sub>). IR (KBr),  $\nu/\text{cm}^{-1}$  3016, 2922, 2852, 1632, 1473, 1352, 1295, 1212, 1189. HRMS [M+H]<sup>+</sup> m/z calcd. for [C<sub>9</sub>H<sub>10</sub>ON<sub>5</sub>S]<sup>+</sup> 236.0606, found 236.0597

### 3-(methylthio)-6-(pyridin-4-yl)-1,2,4,5-tetrazine (3j)

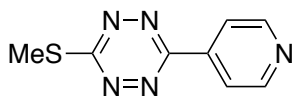

General protocol B was followed using BF<sub>3</sub>·OEt<sub>2</sub> (100  $\mu\text{L}$ , 0.810 mmol), **1j** (140 mg, 0.675 mmol), CH<sub>2</sub>Cl<sub>2</sub> (0.68 mL) for 2 h at 0 °C followed by 12 h at r.t.; Pyridine (164  $\mu\text{L}$ , 2.03 mmol), **2** (118 mg, 0.473 mmol) and DMF (0.47 mL) for 2 h at 80 °C; and PIDA (152 mg, 0.473 mmol) at r.t. for 2 h. A red solid (50.5 mg, 0.246 mmol, 51%) was obtained after purified by chromatography (Hexane:Acetone 100:0 to 9:1). <sup>1</sup>H NMR (400 MHz, CDCl<sub>3</sub>)  $\delta$  8.88 (app d, *J* = 6.2 Hz, 2H), 8.37 (app d, *J* = 6.2 Hz, 2H), 2.82 (s, 3H). <sup>13</sup>C NMR (101 MHz, CDCl<sub>3</sub>)  $\delta$  177.10 (C), 161.09 (C), 151.13 (CH), 139.26 (C), 120.92 (CH), 13.69 (CH<sub>3</sub>). IR (KBr),  $\nu/\text{cm}^{-1}$  3085, 2923, 1594, 1560, 1355, 1194, 905. HRMS [M+H]<sup>+</sup> m/z calcd. for [C<sub>8</sub>H<sub>8</sub>N<sub>5</sub>S]<sup>+</sup> 206.0500, found 206.0492

### methyl 3-(6-(methylthio)-1,2,4,5-tetrazin-3-yl)propanoate (3k)

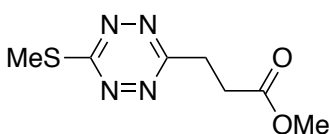

General protocol A was followed using BF<sub>3</sub>·OEt<sub>2</sub> (147  $\mu\text{L}$ , 1.19 mmol), **1k** (515 mg, 2.38 mmol), CH<sub>2</sub>Cl<sub>2</sub> (1.4 mL) for 4 h at -12 °C to -4 °C; Pyridine (384  $\mu\text{L}$ , 4.76 mmol), **2** (473 mg, 1.90 mmol) and DMF (1.9 mL) for 20 min at 80 °C; and PIDA (611 mg, 1.90 mmol) at r.t. for 30 min. A red solid (277 mg, 1.29 mmol, 68%) was obtained after purified by chromatography (Hexane:EA 100:0 to 85:15). <sup>1</sup>H NMR (600 MHz, CDCl<sub>3</sub>)  $\delta$  3.70 (s, 3H), 3.59 (app t, *J* = 7.1 Hz, 2H), 3.03 (app t, *J* = 7.1 Hz, 2H), 2.73 (s, 3H). <sup>13</sup>C NMR (101 MHz, CDCl<sub>3</sub>)  $\delta$  175.85 (C), 172.58 (C), 166.37 (C), 52.15 (CH<sub>3</sub>), 30.77 (CH<sub>2</sub>), 29.39 (CH<sub>2</sub>), 13.51 (CH<sub>3</sub>). IR (KBr),  $\nu/\text{cm}^{-1}$  2953, 2932, 2849, 1737, 1437, 1338, 1292, 1199, 1163. HRMS [M+H]<sup>+</sup> m/z calcd. for [C<sub>7</sub>H<sub>11</sub>O<sub>2</sub>N<sub>4</sub>S]<sup>+</sup> 215.0603, found 215.0596

### tert-butyl 3-(6-(methylthio)-1,2,4,5-tetrazin-3-yl)propanoate (3l)

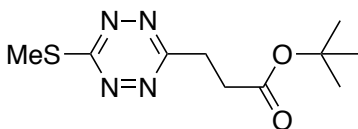

General protocol A was followed using BF<sub>3</sub>·OEt<sub>2</sub> (466  $\mu\text{L}$ , 3.78 mmol), **1l** (1950 mg, 7.55 mmol), CH<sub>2</sub>Cl<sub>2</sub> (7.6 mL) for 6 h at -12 °C to -4 °C; Pyridine (1.22 mL, 15.1 mmol), **2** (1.50 g, 6.04 mmol) and DMF (6.0 mL) for 20 min at 80 °C; and PIDA (1.95 mg, 6.04 mmol) at r.t. for 30 min. A red solid (896 mg, 3.50 mmol, 60%) was obtained after purified by chromatography (Hexane:EA 10:0 to 9:1). <sup>1</sup>H NMR (400 MHz, CDCl<sub>3</sub>)  $\delta$  3.53 (app t, *J* = 7.1 Hz, 2H), 2.93 (app t, *J* = 7.1 Hz, 2H), 2.73 (s, 3H), 1.42 (s, 9H). <sup>13</sup>C NMR (101 MHz, CDCl<sub>3</sub>)  $\delta$  175.69 (C), 171.31 (C), 166.76 (C), 81.22 (C), 32.39 (CH<sub>2</sub>), 29.68 (CH<sub>2</sub>), 28.17 (CH<sub>3</sub>), 13.51 (CH<sub>3</sub>). IR (KBr),  $\nu/\text{cm}^{-1}$  2953, 2931, 1734, 1636, 1436, 1198, 1160. HRMS [M+H]<sup>+</sup> m/z calcd. for [C<sub>10</sub>H<sub>17</sub>O<sub>2</sub>N<sub>4</sub>S]<sup>+</sup> 257.1072, found 257.1061

### methyl 2-(6-(methylthio)-1,2,4,5-tetrazin-3-yl)acetate (3m)

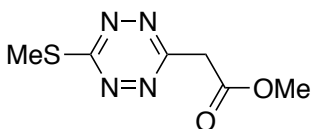

General protocol A was followed using BF<sub>3</sub>·OEt<sub>2</sub> (670  $\mu\text{L}$ , 5.44 mmol), **1m** (2200 mg, 10.9 mmol), CH<sub>2</sub>Cl<sub>2</sub> (10 mL) for 4 h at -12 °C to -4 °C; Pyridine (1760  $\mu\text{L}$ , 21.8 mmol), **2** (2159 mg, 8.71 mmol) and DMF (8.7 mL) for 20 min at 80 °C; and PIDA (2800 mg, 8.71 mmol) at r.t. for 30 min. A red oil (1041 mg, 5.20 mmol, 60%) was obtained after purified by chromatography (Hexane:CH<sub>2</sub>Cl<sub>2</sub> 8:2 to 6:4). <sup>1</sup>H NMR (400 MHz, CDCl<sub>3</sub>)  $\delta$  4.32 (s, 2H), 3.77 (s, 3H), 2.75 (s, 3H). <sup>13</sup>C NMR (101 MHz, CDCl<sub>3</sub>)  $\delta$  176.43 (C), 168.68 (C), 162.36 (C), 52.95 (CH<sub>3</sub>), 40.38 (CH<sub>2</sub>), 13.55 (CH<sub>3</sub>). IR (KBr),  $\nu/\text{cm}^{-1}$  2954, 2847, 1743, 1436, 1358, 1257, 1206, 1069. HRMS [M+H]<sup>+</sup> m/z calcd. for [C<sub>6</sub>H<sub>9</sub>O<sub>2</sub>N<sub>4</sub>S]<sup>+</sup> 201.0446, found 201.0440



***tert*-butyl ((6-(methylthio)-1,2,4,5-tetrazin-3-yl)methyl)carbamate (3n)**

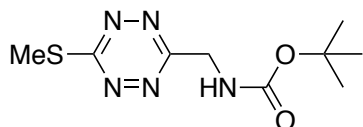

General protocol A was followed using  $\text{BF}_3 \cdot \text{OEt}_2$  (264  $\mu\text{L}$ , 2.14 mmol), **1n** (1100 mg, 4.28 mmol),  $\text{CH}_2\text{Cl}_2$  (4.3 mL) for 4 h at  $-12^\circ\text{C}$  to  $-4^\circ\text{C}$ ; Pyridine (690  $\mu\text{L}$ , 8.56 mmol), **2** (850 mg, 3.42 mmol) and DMF (3.4 mL) for 20 min at  $80^\circ\text{C}$ ; and PIDA (1101 mg, 3.42 mmol) at r.t. for 30 min. A red solid (602 mg, 2.34 mmol, 69%) was obtained after purified by chromatography (Hexane:EA 100:0 to 85:15).  $^1\text{H}$  NMR (400 MHz,  $\text{CDCl}_3$ )  $\delta$  5.56 (s, 1H), 4.88 (d,  $J = 6.0$  Hz, 2H), 2.72 (s, 3H), 1.43 (s, 9H).  $^{13}\text{C}$  NMR (101 MHz,  $\text{CDCl}_3$ )  $\delta$  176.67 (C), 164.44 (C), 155.86 (C), 80.43 (C), 43.18 ( $\text{CH}_2$ ), 28.40 ( $\text{CH}_3$ ), 13.50 ( $\text{CH}_3$ ). IR (KBr),  $\nu/\text{cm}^{-1}$  3356, 2978, 2833, 1704, 1517, 1367, 1280, 1170. HRMS  $[\text{M}+\text{H}]^+$   $m/z$  calcd. for  $[\text{C}_9\text{H}_{15}\text{O}_2\text{N}_5\text{S}]^+$  258.1025, found 258.1013

**(S)-*tert*-butyl 2-((*tert*-butoxycarbonyl)amino)-3-(6-(methylthio)-1,2,4,5-tetrazin-3-yl)propanoate (3o)**

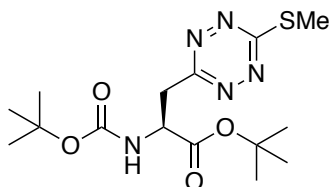

General protocol A was followed using  $\text{BF}_3 \cdot \text{OEt}_2$  (86  $\mu\text{L}$ , 0.68 mmol), **1o** (510 mg, 1.4 mmol),  $\text{CH}_2\text{Cl}_2$  (1.4 mL) for 4 h at  $-12^\circ\text{C}$  to  $-4^\circ\text{C}$ ; Pyridine (220  $\mu\text{L}$ , 2.74 mmol), **2** (238 mg, 0.96 mmol) and DMF (0.9 mL) for 20 min at  $80^\circ\text{C}$ ; and PIDA (307 mg, 0.96 mmol) at r.t. for 30 min. A red oil (475 mg, 1.3 mmol, 64%) was obtained after purified by chromatography (Hexane:Et<sub>2</sub>O 100:0 to 85:15).  $^1\text{H}$  NMR (400 MHz,  $\text{CDCl}_3$ )  $\delta$  5.42 (d,  $J = 7.9$  Hz, 1H), 4.72-4.67 (m, 1H), 3.74 (dd,  $J = 14.6, 5.2$  Hz, 1H), 3.62 (dd,  $J = 14.6, 7.0$  Hz, 1H), 2.71 (s, 3H), 1.41 (s, 9H), 1.37 (s, 9H), peak at 5.09, 4.60 ppm due to minor rotamer.  $^{13}\text{C}$  NMR (101 MHz,  $\text{CDCl}_3$ )  $\delta$  175.92 (C), 169.79 (C), 164.70 (C), 155.17 (C), 83.06 (C), 80.16 (C), 52.85 (CH), 37.75 ( $\text{CH}_2$ ), 28.34 ( $\text{CH}_3$ ), 28.00 ( $\text{CH}_3$ ), 13.45 ( $\text{CH}_3$ ). IR (KBr),  $\nu/\text{cm}^{-1}$  3344, 2979, 2933, 1737, 1713, 1502, 1367, 1154. HRMS  $[\text{M}+\text{H}]^+$   $m/z$  calcd. for  $[\text{C}_{15}\text{H}_{26}\text{O}_4\text{N}_5\text{S}]^+$  372.1706, found 372.1691

**(S)-*tert*-butyl 2-((*tert*-butoxycarbonyl)amino)-4-(6-(methylthio)-1,2,4,5-tetrazin-3-yl)butanoate (3p)**

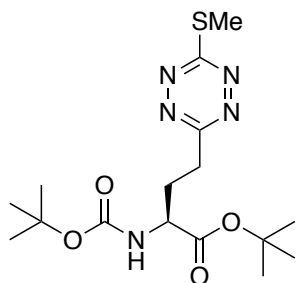

General protocol A was followed using  $\text{BF}_3 \cdot \text{OEt}_2$  (118  $\mu\text{L}$ , 0.955 mmol), **1p** (524 mg, 1.91 mmol),  $\text{CH}_2\text{Cl}_2$  (1.9 mL) for 4 h at  $-12^\circ\text{C}$  to  $-4^\circ\text{C}$ ; Pyridine (309  $\mu\text{L}$ , 3.83 mmol), **2** (322 mg, 1.34 mmol) and DMF (1.3 mL) for 20 min at  $80^\circ\text{C}$ ; and PIDA (431 mg, 1.34 mmol) at r.t. for 30 min. A red solid (720 mg, 1.87 mmol, 70%) was obtained after purified by chromatography (Hexane:Et<sub>2</sub>O 100:0 to 85:15).  $^1\text{H}$  NMR (400 MHz,  $\text{CDCl}_3$ )  $\delta$  5.14 (d,  $J = 8.2$  Hz, 1H), 4.35 (app dt,  $J = 8.2, 4.8$  Hz, 1H), 3.39 - 3.24 (m, 2H), 2.72 (s, 3H), 2.51 - 2.43 (m, 1H), 2.24 - 2.15 (m, 1H), 1.47 (s, 9H), 1.43 (s, 9H), peak at 4.90, 4.18 ppm due to minor rotamer.  $^{13}\text{C}$  NMR (101 MHz,  $\text{CDCl}_3$ )  $\delta$  175.67 (C), 171.30 (C), 167.23 (C), 155.42 (C), 82.61 (C), 80.05 (C), 53.52 (CH), 31.25 ( $\text{CH}_2$ ), 30.66 ( $\text{CH}_2$ ), 28.42 ( $\text{CH}_3$ ), 28.12 ( $\text{CH}_3$ ), 13.49 ( $\text{CH}_3$ ). IR (KBr),  $\nu/\text{cm}^{-1}$  3369, 2977, 2917, 2849, 1722, 1636, 1367, 1164, 738. HRMS  $[\text{M}+\text{H}]^+$   $m/z$  calcd. for  $[\text{C}_{16}\text{H}_{28}\text{O}_4\text{N}_5\text{S}]^+$  386.1862, found 386.1847

**(3S,4S,6R)-4-(4-(6-(methylthio)-1,2,4,5-tetrazin-3-yl)butyl)tetrahydro-1H-thieno[3,4-d]imidazol-2(3H)-one (3q)**

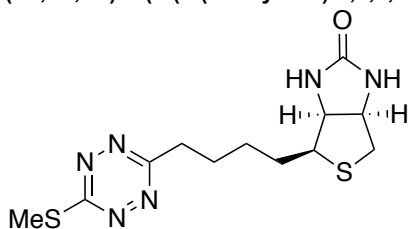

General protocol A was followed using  $\text{BF}_3 \cdot \text{OEt}_2$  (121  $\mu\text{L}$ , 0.982 mmol), **1q** (215 mg, 0.654 mmol),  $\text{CH}_2\text{Cl}_2$  (0.65 mL) for 4 h at  $-12^\circ\text{C}$  to  $-4^\circ\text{C}$ ; Pyridine (159  $\mu\text{L}$ , 1.96 mmol), **2** (112 mg, 0.452 mmol) and DMF (0.45 mL) for 20 min at  $80^\circ\text{C}$ ; and PIDA (140 mg, 0.452 mmol) at r.t. for 30 min. A red solid (95.9 mg, 0.294 mmol, 66%) was obtained after purified by chromatography ( $\text{CH}_2\text{Cl}_2$ :MeOH 100:0 to 95:5).  $^1\text{H}$  NMR (600 MHz,  $\text{CDCl}_3$ )  $\delta$  6.17 (s, 1H), 5.35 (s, 1H), 4.51 (app dd,  $J = 7.6, 5.0$  Hz, 1H), 4.32 (app dd,  $J = 7.6, 5.0$  Hz, 1H), 3.27 (t,  $J = 7.7$  Hz, 2H), 3.18 - 3.14 (m, 1H), 2.90 (dd,  $J = 12.8, 5.0$  Hz, 1H), 2.76 - 2.69 (m, 4H), 2.03 - 1.90 (m, 2H), 1.86 - 1.70 (m, 2H), 1.62 - 1.50 (m, 2H).  $^{13}\text{C}$  NMR (101 MHz,  $\text{CDCl}_3$ )  $\delta$  175.54 (C), 167.90 (C), 163.84 (C), 62.00 (CH), 60.23 (CH), 55.63 (CH), 40.69 (CH<sub>2</sub>), 34.01 (CH<sub>2</sub>), 28.40 (CH<sub>2</sub>), 28.37 (CH<sub>2</sub>), 28.36 (CH<sub>2</sub>), 13.51 (CH<sub>3</sub>). IR (KBr),  $\nu/\text{cm}^{-1}$  3422, 2931, 2859, 1702, 1460, 1265, 1159, 739. HRMS  $[\text{M}+\text{H}]^+$   $m/z$  calcd. for  $[\text{C}_{12}\text{H}_{19}\text{ON}_6\text{S}_2]^+$  327.1062, found 327.1049

**(3R,5R,8R,9S,10S,13R,14S,17R)-10,13-dimethyl-17-((R)-4-(6-(methylthio)-1,2,4,5-tetrazin-3-yl)butan-2-yl)hexadecahydro-1H-cyclopenta[a]phenanthren-3-ol (3r)**

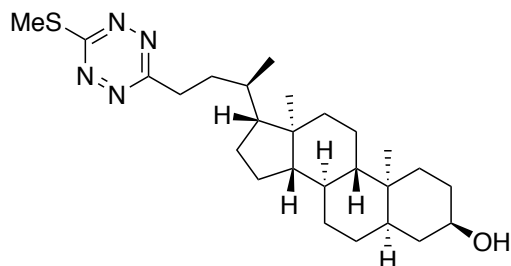

General protocol A was followed using  $\text{BF}_3 \cdot \text{OEt}_2$  (227  $\mu\text{L}$ , 1.79 mmol), **1r** (550 mg, 1.19 mmol),  $\text{CH}_2\text{Cl}_2$  (1.20 mL) for 4 h at  $-12^\circ\text{C}$  to  $-4^\circ\text{C}$ ; Pyridine (290  $\mu\text{L}$ , 3.58 mmol), **2** (206 mg, 0.831 mmol) and DMF (0.83 mL) for 20 min at  $80^\circ\text{C}$ ; and PIDA (267 mg, 0.831 mmol) at r.t. for 30 min. A red solid (365 mg, 0.798 mmol, 67%) was obtained after purified by chromatography ( $\text{CH}_2\text{Cl}_2$ :Et<sub>2</sub>O 100:0 to 85:15).  $^1\text{H}$  NMR (600 MHz,  $\text{CDCl}_3$ )  $\delta$  3.65 - 3.58 (m, 1H), 3.28 (ddd,  $J = 14.0, 10.7, 4.9$  Hz, 1H), 3.12 (ddd,  $J = 14., 10.7, 6.2$  Hz, 1H), 2.72 (s, 3H), 2.09 - 1.94 (m, 2H), 1.92 - 1.71 (m, 4H), 1.69 - 1.45 (m, 7H), 1.45 - 0.84 (m, 20H), 0.65 (s, 3H).  $^{13}\text{C}$  NMR (151 MHz,  $\text{CDCl}_3$ )  $\delta$  175.36, 168.79, 67.24, 56.66, 56.13, 42.97, 42.27, 40.62, 40.36, 36.65, 36.03, 35.77, 35.52, 34.94, 34.74, 31.48, 30.74, 28.39, 27.35, 26.57, 24.35, 23.52, 21.00, 18.64, 13.45, 12.24. IR (KBr),  $\nu/\text{cm}^{-1}$  3362, 2932, 2863, 1449, 1360, 1313, 1162, 1068, 737. HRMS  $[\text{M}+\text{H}]^+$   $m/z$  calcd. for  $[\text{C}_{26}\text{H}_{43}\text{ON}_4\text{S}]^+$  459.3158, found 459.3142

**3-(methylthio)-6-(1-((5-(trifluoromethyl)pyridin-2-yl)oxy)cyclopropyl)-1,2,4,5-tetrazine (3s)**

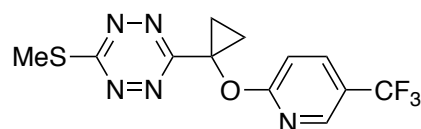

General protocol A was followed using  $\text{BF}_3 \cdot \text{OEt}_2$  (53.1  $\mu\text{L}$ , 0.432 mmol), **1s** (95.4 mg, 0.288 mmol),  $\text{CH}_2\text{Cl}_2$  (0.29 mL) for 4 h at  $-12^\circ\text{C}$  to  $-4^\circ\text{C}$ ; Pyridine (69.7  $\mu\text{L}$ , 0.864 mmol), **2** (50.1 mg, 0.202 mmol) and DMF (0.20 mL) for 20 min at  $80^\circ\text{C}$ ; and PIDA (65.0 mg, 0.202 mmol) at r.t. for 30 min. A red oil (43.2 mg, 0.131 mmol, 65%) was obtained after purified by chromatography (Hexane: Et<sub>2</sub>O 10:0 to 9:1).  $^1\text{H}$  NMR (400 MHz,  $\text{CDCl}_3$ )  $\delta$  8.27 (s, 1H), 7.83 (dd,  $J = 8.7, 2.5$  Hz, 1H), 7.00 (d,  $J = 8.7$  Hz, 1H), 2.70 (s, 3H), 2.10 - 1.89 (m, 2H), 1.82 - 1.64 (m, 2H).  $^{13}\text{C}$  NMR (101 MHz,  $\text{CDCl}_3$ )  $\delta$  175.22 (C), 167.13 (C), 164.93 (C), 144.83 (CH, q,  $J_{\text{C-F}} = 4.1$  Hz), 136.31 (CH, q,  $J_{\text{C-F}} = 1.5$  Hz), 123.89 (C, q,  $J_{\text{C-F}} = 269.7$  Hz), 121.27 (C, q,  $J_{\text{C-F}} = 32.9$  Hz), 111.69 (CH), 59.04 (C), 19.45 (CH<sub>2</sub>), 13.49 (CH<sub>3</sub>). IR (KBr),  $\nu/\text{cm}^{-1}$  3016, 2931, 2853, 1614, 1582, 1492, 1289, 1208, 1125. HRMS  $[\text{M}+\text{H}]^+$   $m/z$  calcd. for  $[\text{C}_{12}\text{H}_{11}\text{ON}_5\text{SF}_3]^+$  330.0636, found 330.0624

**(S)-tert-butyl (1-(6-(methylthio)-1,2,4,5-tetrazin-3-yl)-2-(pyridin-4-yl)ethyl)carbamate (3t)**

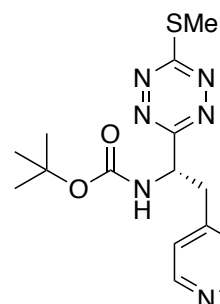

General protocol A was followed using  $\text{BF}_3 \cdot \text{OEt}_2$  (51  $\mu\text{L}$ , 0.42 mmol), **1t** (97 mg, 0.28 mmol),  $\text{CH}_2\text{Cl}_2$  (0.28 mL) for 4 h at  $-12^\circ\text{C}$  to  $4^\circ\text{C}$ ; Pyridine (67  $\mu\text{L}$ , 0.83 mmol), **2** (50 mg, 0.20 mmol) and DMF (0.2 mL) for 20 min at  $80^\circ\text{C}$ ; and PIDA (60 mg, 0.20 mmol) at r.t. for 30 min. A red oil (39 mg, 0.11 mmol, 55%) was obtained after purified by chromatography ( $\text{CH}_2\text{Cl}_2$ :MeOH 100:0 to 97:3).  $^1\text{H}$  NMR (400 MHz,  $\text{CDCl}_3$ )  $\delta$  8.51 (m, 2H), 7.08 - 7.07 (m, 2H), 5.65 - 5.62 (m, 1H), 5.53 - 5.51 (m, 1H), 3.44 - 3.39 (m, 1H), 3.30 - 3.24 (m, 1H), 2.74 (s, 3H), 1.39 (s, 9H).  $^{13}\text{C}$  NMR (101 MHz,  $\text{CDCl}_3$ )  $\delta$  176.94 (C), 166.05 (C), 155.00 (C), 149.96 (CH), 145.18 (C), 124.99 (CH), 80.73 (C), 53.78 ( $\text{CH}_2$ ), 40.82 ( $\text{CH}_2$ ), 28.35 ( $\text{CH}_3$ ), 13.57 ( $\text{CH}_3$ ). IR (KBr),  $\nu/\text{cm}^{-1}$  3006, 2925, 2852, 1710, 1604, 1519, 1366, 1249, 1165. HRMS  $[\text{M}+\text{H}]^+$   $m/z$  calcd. for  $[\text{C}_{15}\text{H}_{21}\text{O}_2\text{N}_6\text{S}]^+$  349.1447, found 349.1443

### 3-(methylthio)-6-((1-phenyl-5-(trifluoromethyl)-1H-pyrazol-4-yl)methyl)-1,2,4,5-tetrazine (3u)

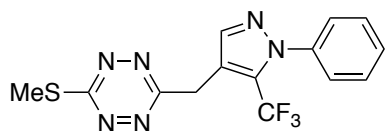

General protocol A was followed using  $\text{BF}_3 \cdot \text{OEt}_2$  (88  $\mu\text{L}$ , 0.72 mmol), **1u** (102 mg, 0.29 mmol),  $\text{CH}_2\text{Cl}_2$  (0.29 mL) for 4 h at  $-12^\circ\text{C}$  to  $4^\circ\text{C}$ ; Pyridine (117  $\mu\text{L}$ , 1.4 mmol), **2** (50 mg, 0.20 mmol) and DMF (0.20 mL) for 20 min at  $80^\circ\text{C}$ ; and PIDA (65 mg, 0.20 mmol) at r.t. for 30 min. A red solid (48 mg, 0.14 mmol, 68%) was obtained after purified by chromatography (Hexane: $\text{CH}_2\text{Cl}_2$  3:7 to 0:10).  $^1\text{H}$  NMR (400 MHz,  $\text{CDCl}_3$ )  $\delta$  7.72 (s, 1H), 7.56 - 7.40 (m, 5H), 4.66 (d,  $J = 1.4$  Hz, 2H), 2.75 (s, 3H).  $^{13}\text{C}$  NMR (101 MHz,  $\text{CDCl}_3$ )  $\delta$  176.19 (C), 165.89 (C), 141.21 (CH), 139.51 (C), 129.98 (q,  $J_{\text{C-F}} = 37.6$  Hz, C), 129.62 (CH), 129.19 (CH), 126.12 (CH), 120.45 (q,  $J_{\text{C-F}} = 268.5$  Hz, C), 118.02 (C), 29.65 ( $\text{CH}_2$ ), 13.56 ( $\text{CH}_3$ ). IR (KBr),  $\nu/\text{cm}^{-1}$  3056, 2974 2933, 2825, 1653, 1528, 1266, 740, 702. HRMS  $[\text{M}+\text{H}]^+$   $m/z$  calcd. for  $[\text{C}_{14}\text{H}_{12}\text{N}_6\text{F}_3\text{S}]^+$  353.0796, found 353.0784

### (2S,3S)-tert-butyl 2-(6-(methylthio)-1,2,4,5-tetrazin-3-yl)-3-(pyridin-4-ylmethyl)pyrrolidine-1-carboxylate (3v)

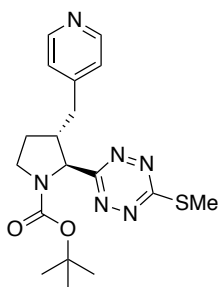

General protocol A was followed using  $\text{BF}_3 \cdot \text{OEt}_2$  (42  $\mu\text{L}$ , 0.34 mmol), **1v** (90 mg, 0.23 mmol),  $\text{CH}_2\text{Cl}_2$  (0.23 mL) for 4 h at  $-12^\circ\text{C}$  to  $4^\circ\text{C}$ ; Pyridine (56  $\mu\text{L}$ , 0.68 mmol), **2** (40 mg, 0.16 mmol) and DMF (0.16 mL) for 20 min at  $80^\circ\text{C}$ ; and PIDA (51 mg, 0.16 mmol) at r.t. for 30 min. A red solid (41 mg, 0.11 mmol, 64%) was obtained after purified by chromatography ( $\text{CH}_2\text{Cl}_2$ :Acetone 10:0 to 85:15). Two rotamers:  $^1\text{H}$  NMR (400 MHz,  $\text{CDCl}_3$ )  $\delta$  8.48 - 8.46 (m, 4H), 7.09 (d,  $J = 5.0$  Hz, 2H), 7.04 (d,  $J = 5.0$  Hz, 2H), 5.00 (d,  $J = 5.6$  Hz, 1H), 4.86 (d,  $J = 6.2$  Hz, 1H), 3.83 (ddd,  $J = 11.3, 7.9, 3.7$  Hz, 1H), 3.76 - 3.57 (m, 3H), 3.07 - 2.64 (m, 12H), 2.33 - 2.04 (m, 2H), 1.83 - 1.68 (m, 2H), 1.40 (s, 9H), 1.13 (s, 9H).  $^{13}\text{C}$  NMR (101 MHz,  $\text{CDCl}_3$ )  $\delta$  176.25 (C), 176.15 (C), 168.47 (C), 168.08 (C), 154.40 (C), 153.35 (C), 150.09 (CH, both rotamers), 147.78 (C), 147.67 (C), 124.41 (CH), 124.29 (CH), 80.48 (C, both rotamers), 65.12 (CH), 64.88 (CH), 48.33 (CH), 47.20 (CH), 46.38 ( $\text{CH}_2$ ), 46.26 ( $\text{CH}_2$ ), 37.79 ( $\text{CH}_2$ , both rotamers), 29.77 ( $\text{CH}_2$ ), 29.71 ( $\text{CH}_2$ ), 28.48 ( $\text{CH}_3$ ), 28.25 ( $\text{CH}_3$ ), 13.53 ( $\text{CH}_3$ , both rotamers). IR (KBr),  $\nu/\text{cm}^{-1}$  3057, 2962, 2917, 2850, 1726, 1640, 1529, 1266, 741. HRMS  $[\text{M}+\text{H}]^+$   $m/z$  calcd. for  $[\text{C}_{18}\text{H}_{25}\text{O}_2\text{N}_6\text{S}]^+$  389.1760, found 389.1745

### 5,5-difluoro-7,9-dimethyl-3-(2-(6-(methylthio)-1,2,4,5-tetrazin-3-yl)ethyl)-5H-dipyrrolo[1,2-c:2',1'-f][1,3,2]diazaborinin-4-ium-5-uide (3w)

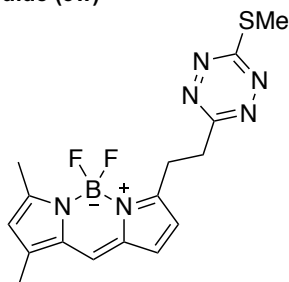

General protocol A was followed using  $\text{BF}_3 \cdot \text{OEt}_2$  (20  $\mu\text{L}$ , 0.16 mmol), **1w** (40 mg, 0.11 mmol),  $\text{CH}_2\text{Cl}_2$  (0.16 mL) for 4 h at  $-12^\circ\text{C}$  to  $4^\circ\text{C}$ ; Pyridine (27  $\mu\text{L}$ , 0.33 mmol), **2** (19 mg, 0.077 mmol) and DMF (77  $\mu\text{L}$ ) for 20 min at  $80^\circ\text{C}$ ; and PIDA (24 mg, 0.077 mmol) at r.t. for 30 min. An orange solid (16 mg, 0.043 mmol, 57%) was obtained after purified by chromatography (Hexane:  $\text{CH}_2\text{Cl}_2$  1:1 to 1:9).  $^1\text{H}$

NMR (400 MHz, CDCl<sub>3</sub>) δ 7.09 (s, 1H), 6.86 (d, *J* = 4.0 Hz, 1H), 6.25 (d, *J* = 4.0 Hz, 1H), 6.12 (s, 1H), 3.71 (app t, *J* = 7.5, 1.3 Hz, 2H), 3.60 (app t, *J* = 7.5 Hz, 2H), 2.73 (s, 3H), 2.56 (s, 3H), 2.25 (s, 3H). <sup>13</sup>C NMR (101 MHz, CDCl<sub>3</sub>) δ 175.69 (C), 166.95 (C), 161.16 (C), 155.99 (C), 144.33 (C), 135.58 (C), 133.37 (C), 127.97 (CH), 124.04 (CH), 120.80 (CH), 116.72 (CH), 33.60 (CH<sub>2</sub>), 26.84 (CH<sub>2</sub>), 15.16 (CH<sub>3</sub>), 13.51 (CH<sub>3</sub>), 11.49 (CH<sub>3</sub>). IR (KBr), ν/cm<sup>-1</sup> 3062, 3030, 2930, 2864, 1454, 1327, 1306, 1163, 1098, 893, 741, 699. HRMS [M+H]<sup>+</sup> *m/z* calcd. for [C<sub>16</sub>H<sub>18</sub>N<sub>6</sub>F<sub>2</sub>BS]<sup>+</sup> 375.1375, found 375.1369

### 3-(methylthio)-6-phenyl-1,2,4,5-tetrazine (3x)

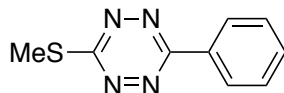

General protocol B was followed using BF<sub>3</sub>·OEt<sub>2</sub> (362 μL, 2.94 mmol), **1x** (1200 mg, 5.87 mmol), CH<sub>2</sub>Cl<sub>2</sub> (0.59 mL) for 4 h at -5 °C to -0 °C; Pyridine (948 μL, 11.7 mmol), **2** (1019 mg, 4.11 mmol) and DMF (4.1 mL) for 1 h at 80 °C; and PIDA (1323 mg, 4.11 mmol) at r.t. for 30 min. A red solid (587 mg, 2.87 mmol, 72%) was obtained after purified by chromatography (CH<sub>2</sub>Cl<sub>2</sub>: ether 100:0 to 95:5). <sup>1</sup>H NMR (400 MHz, CDCl<sub>3</sub>) δ 8.65 – 8.20 (m, 2H), 8.09 – 7.46 (m, 3H), 2.80 (s, 3H). <sup>13</sup>C NMR (101 MHz, CDCl<sub>3</sub>) δ 175.43 (C), 162.44 (C), 132.45 (CH), 131.71 (C), 129.38 (CH), 127.62 (CH), 13.60 (CH<sub>3</sub>). IR (KBr), ν/cm<sup>-1</sup> 3074, 3014, 2936, 1356, 1196, 897, 760. HRMS [M+H]<sup>+</sup> *m/z* calcd. for [C<sub>9</sub>H<sub>9</sub>N<sub>4</sub>S]<sup>+</sup> 205.0548, found 205.0540

### 3-(methylthio)-2-fluoro-6-phenyl-1,2,4,5-tetrazine (3y)

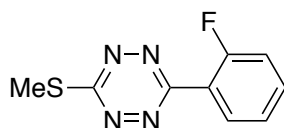

General protocol B was followed using BF<sub>3</sub>·OEt<sub>2</sub> (98.5 μL, 0.798 mmol), **1y** (358 mg, 1.60 mmol), CH<sub>2</sub>Cl<sub>2</sub> (1.6 mL) for 6 h at -2 °C to -0 °C; Pyridine (258 μL, 3.19 mmol), **2** (277 mg, 1.12 mmol) and DMF (1.1 mL) for 1 h at 80 °C; and PIDA (361 mg, 1.12 mmol) at r.t. for 1 h. A red solid (177 mg, 0.797 mmol, 50%) was obtained after purified by chromatography (Hexane: EA 100:0 to 95:5). <sup>1</sup>H NMR (400 MHz, CDCl<sub>3</sub>) δ 8.21 (td, *J* = 7.6, 1.8 Hz, 1H), 7.59 (m, 1H), 7.37 (td, *J* = 7.6, 1.2 Hz, 1H), 7.30 (m, 1H), 2.80 (s, 3H). <sup>13</sup>C NMR (101 MHz, CDCl<sub>3</sub>) δ 175.21 (C), 162.06 (d, *J*<sub>C-F</sub> = 5.5 Hz, C), 161.33 (d, *J*<sub>C-F</sub> = 257.0 Hz, C), 133.76 (d, *J*<sub>C-F</sub> = 8.5 Hz, CH), 131.07 (d, *J*<sub>C-F</sub> = 1.4 Hz, CH), 124.88 (d, *J*<sub>C-F</sub> = 3.9 Hz, CH), 120.57 (d, *J*<sub>C-F</sub> = 9.9 Hz, C), 117.43 (d, *J*<sub>C-F</sub> = 21.5 Hz, CH), 13.58 (CH<sub>3</sub>). HRMS [M+H]<sup>+</sup> *m/z* calcd. for [C<sub>9</sub>H<sub>8</sub>N<sub>4</sub>FS]<sup>+</sup> 223.0454, found 223.0447

## General procedure for the synthesis of 3-monosubstituted tetrazines

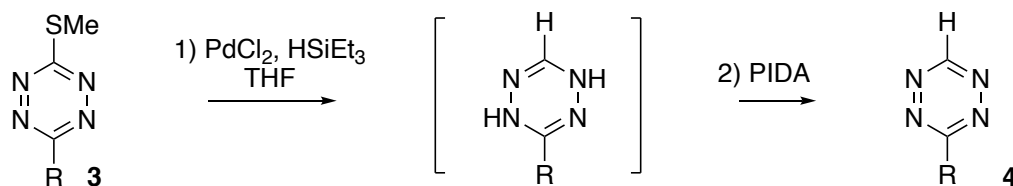

To a dry round-bottom flask was added tetrazine thioether **3** (1 equiv.) and PdCl<sub>2</sub> (10 mol%). The flask was outfitted with a septum-fitted gas inlet adapter, and was twice evacuated and backfilled with nitrogen. Triethylsilane (3 equiv.) and anhydrous THF (to 0.1 M in **3**) were added via syringe, and the flask was heated by an oil bath at 45 °C. The mixture was allowed to stir at 45 °C for 24 h. PIDA (1.2 equiv) was added as a solid at r.t. After stirring at room temperature for 1 h, the reaction mixture was diluted with CH<sub>2</sub>Cl<sub>2</sub>, transferred to a separatory funnel and was sequentially washed with saturated sodium bicarbonate, water, brine, dried over sodium sulfate and concentrated by rotary evaporation. The residue was purified by flash column chromatography on silica gel.

### *tert*-butyl 4-(1,2,4,5-tetrazin-3-yl)phenyl)carbamate (**4a**)

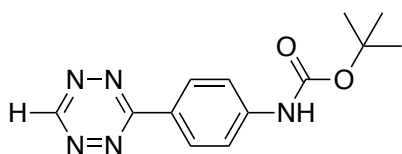

The general protocol for thioether reduction was followed using **3b** (67 mg, 0.21 mmol), PdCl<sub>2</sub> (3.7 mg, 0.021 mmol), HSiEt<sub>3</sub> (0.10 mL, 0.63 mmol), THF (2.1 mL) and PIDA (80 mg, 0.25 mmol). A pink solid (47 mg, 0.17 mmol, 82%) was obtained after column chromatography (CH<sub>2</sub>Cl<sub>2</sub>:Et<sub>2</sub>O 100:0 to 97:3). <sup>1</sup>H NMR (400 MHz, CDCl<sub>3</sub>) δ 10.15 (s, 1H), 8.57 (app d, *J* = 8.9 Hz, 2H), 7.61 (d, *J* = 8.9 Hz, 2H), 6.75 (s, 1H), 1.55 (s, 9H). <sup>13</sup>C NMR (101 MHz, CDCl<sub>3</sub>) δ 166.12, 157.58, 152.28, 143.24, 129.65, 125.82, 118.51, 81.60, 28.43. IR (KBr), ν/cm<sup>-1</sup> 3055, 2932, 2862, 1653, 1528, 1266, 741. HRMS [M+H]<sup>+</sup> *m/z* calcd. for [C<sub>13</sub>H<sub>16</sub>O<sub>2</sub>N<sub>5</sub>]<sup>+</sup> 274.1304, found 274.1293

### *tert*-butyl 4-(1,2,4,5-tetrazin-3-yl)benzyl)carbamate (**4b**)

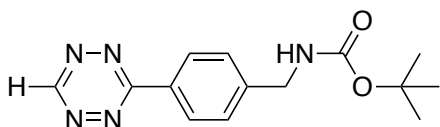

The general protocol for thioether reduction was followed using **3c** (150 mg, 0.45 mmol), PdCl<sub>2</sub> (8.0 mg, 0.045 mmol), HSiEt<sub>3</sub> (0.22 mL, 1.4 mmol), THF (4.5 mL) and PIDA (174 mg, 0.54 mmol). A pink solid (106 mg, 0.37 mmol, 82%) was obtained after column chromatography (Hexane:Et<sub>2</sub>O 100:0 to 85:15). <sup>1</sup>H NMR (400 MHz, CDCl<sub>3</sub>) δ 10.21 (s, 1H), 8.59 (app d, *J* = 8.1 Hz, 2H), 7.52 (app d, *J* = 8.1 Hz, 2H), 4.98 (s, 1H), 4.45 (d, *J* = 6.2 Hz, 2H), 1.48 (s, 9H). <sup>13</sup>C NMR (101 MHz, CDCl<sub>3</sub>) δ 166.35, 157.87, 156.06, 144.79, 130.60, 128.65, 128.21, 79.96, 44.43, 28.51. IR (KBr), ν/cm<sup>-1</sup> 3352, 3087, 2980, 2930, 2884, 1702, 1684, 1610, 1510, 1435, 1349, 1247, 1168. HRMS [M+H]<sup>+</sup> *m/z* calcd. for [C<sub>14</sub>H<sub>18</sub>O<sub>2</sub>N<sub>5</sub>]<sup>+</sup> 288.1460, found 288.1449

### 3-(4-methoxyphenyl)-1,2,4,5-tetrazine (**4c**)

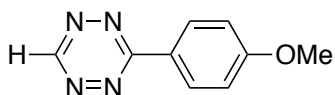

The general protocol for thioether reduction was followed using **3e** (50 mg, 0.21 mmol), PdCl<sub>2</sub> (3.8 mg, 0.021 mmol), HSiEt<sub>3</sub> (0.10 mL, 0.64 mmol), THF (2.1 mL) and PIDA (82 mg, 0.26 mmol). A pink solid (34 mg, 0.18 mmol, 85%) was obtained after column chromatography (Hexane:Et<sub>2</sub>O 100:0 to 94:6). <sup>1</sup>H NMR (400 MHz, CDCl<sub>3</sub>) δ 10.13 (s, 1H), 8.58 (app d, *J* = 8.9 Hz, 2H), 7.09 (app d, *J* = 8.9 Hz, 2H), 3.93 (s, 3H). <sup>13</sup>C NMR (101 MHz, CDCl<sub>3</sub>) δ 166.21, 163.86, 157.44, 130.28, 124.00, 114.92, 55.67. IR (KBr), ν/cm<sup>-1</sup> 3058, 2963, 2932, 2871, 1640, 1529, 1267, 740. HRMS [M+H]<sup>+</sup> *m/z* calcd. for [C<sub>9</sub>H<sub>9</sub>ON<sub>4</sub>]<sup>+</sup> 189.0776, found 189.0769

### methyl 4-(1,2,4,5-tetrazin-3-yl)benzoate (**4d**)

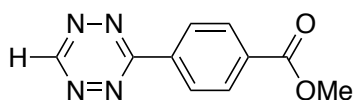

The general protocol for thioether reduction was followed using **3g** (50 mg, 0.19 mmol), PdCl<sub>2</sub> (3.3 mg, 0.019 mmol), HSiEt<sub>3</sub> (0.091 mL, 0.57 mmol), THF (1.9 mL) and PIDA (73 mg, 0.23 mmol). A pink solid (30 mg, 0.14 mmol, 73%) was obtained after column chromatography (Hexane:EA 100:0 to 92:8). <sup>1</sup>H NMR (400 MHz, CDCl<sub>3</sub>) δ 10.28 (s, 1H), 8.72 (app d, *J* = 8.7 Hz, 2H), 8.27 (app d, *J* = 8.7 Hz, 2H), 3.99 (s, 3H). <sup>13</sup>C NMR (151 MHz, CDCl<sub>3</sub>) δ 166.37, 166.12, 158.11, 135.61, 134.28, 130.58, 128.39, 52.67. IR (KBr), ν/cm<sup>-1</sup> 3060, 2994, 2946, 1714, 1432, 1355, 1275, 1190, 1111, 767. HRMS [M+H]<sup>+</sup> *m/z* calcd. for [C<sub>10</sub>H<sub>9</sub>O<sub>2</sub>N<sub>4</sub>]<sup>+</sup> 217.0726, found 217.0720

#### 4-(1,2,4,5-tetrazin-3-yl)benzonitrile (**4e**)

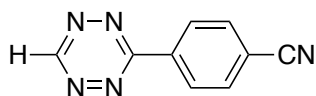

The general protocol for thioether reduction was followed using **3h** (50 mg, 0.22 mmol), PdCl<sub>2</sub> (3.9 mg, 0.022 mmol), HSiEt<sub>3</sub> (0.10 mL, 0.65 mmol), THF (2.2 mL) and PIDA (84 mg, 0.26 mmol). A pink solid (27 mg, 0.15 mmol, 68%) was obtained after column chromatography (Hexane:Et<sub>2</sub>O 100:0 to 9:1). <sup>1</sup>H NMR (400 MHz, CDCl<sub>3</sub>) δ 10.33 (s, 1H), 8.78 (app d, *J* = 8.5 Hz, 2H), 7.93 (app d, *J* = 8.5 Hz, 2H). <sup>13</sup>C NMR (101 MHz, CDCl<sub>3</sub>) δ 165.49, 158.28, 135.68, 133.20, 128.83, 118.10, 116.74. IR (KBr), ν/cm<sup>-1</sup> 3095, 3053, 2931, 2225, 1445, 1354, 1200, 903, 855.

#### methyl 3-(1,2,4,5-tetrazin-3-yl)propanoate (**4f**)

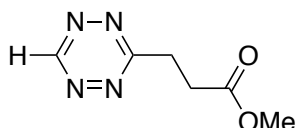

The general protocol for thioether reduction was followed using **3k** (225 mg, 1.05 mmol), PdCl<sub>2</sub> (18.6 mg, 0.105 mmol), HSiEt<sub>3</sub> (0.510 mL, 3.15 mmol), THF (10.5 mL) and PIDA (405 mg, 1.26 mmol). A pink solid (133 mg, 0.790 mmol, 75%) was obtained after column chromatography (Hexane:EA 100:0 to 85:15). <sup>1</sup>H NMR (400 MHz, CDCl<sub>3</sub>) δ 10.21 (s, 1H), 3.86 – 3.50 (m, 5H), 3.09 (app t, *J* = 7.0 Hz, 2H). <sup>13</sup>C NMR (101 MHz, CDCl<sub>3</sub>) δ 172.48, 171.59, 158.22, 52.19, 30.53, 30.29. IR (KBr), ν/cm<sup>-1</sup> 2962, 2918, 2838, 1726, 1653, 1529, 1266, 740. HRMS [M+H]<sup>+</sup> *m/z* calcd. for [C<sub>8</sub>H<sub>9</sub>O<sub>2</sub>N<sub>4</sub>]<sup>+</sup> 169.0726, found 169.0720

#### *tert*-butyl ((1,2,4,5-tetrazin-3-yl)methyl)carbamate (**4g**)

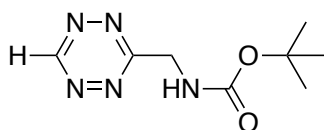

The general protocol for thioether reduction was followed using **3n** (200 mg, 0.777 mmol), PdCl<sub>2</sub> (13.7 mg, 0.0777 mmol), HSiEt<sub>3</sub> (371 μL, 2.33 mmol), THF (7.8 mL) and PIDA (300 mg, 0.932 mmol). A pink solid (129 mg, 0.611 mmol, 79%) was obtained after column chromatography (Hexane:EA 100:0 to 82:18). <sup>1</sup>H NMR (400 MHz, CDCl<sub>3</sub>) δ 10.27 (s, 1H), 5.60 (s, 1H), 5.01 (d, *J* = 6.0 Hz, 2H), 1.45 (s, 9H). <sup>13</sup>C NMR (101 MHz, CDCl<sub>3</sub>) δ 169.53, 158.82, 155.90, 80.66, 43.89, 28.41. IR (KBr), ν/cm<sup>-1</sup> 3350, 2979, 2934, 1709, 1517, 1251, 1168. HRMS [M+H]<sup>+</sup> *m/z* calcd. for [C<sub>8</sub>H<sub>14</sub>O<sub>2</sub>N<sub>5</sub>]<sup>+</sup> 212.1147, found 212.1140

#### (*S*)-*tert*-butyl 2-((*tert*-butoxycarbonyl)amino)-3-(1,2,4,5-tetrazin-3-yl)propanoate (**4h**)

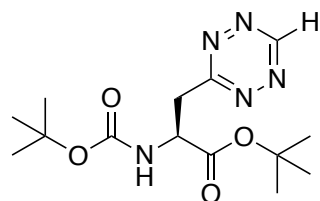

The general protocol for thioether reduction was followed using **3o** (165 mg, 0.444 mmol), PdCl<sub>2</sub> (7.86 mg, 0.0444 mmol), HSiEt<sub>3</sub> (213 μL, 1.33 mmol), THF (4.4 mL) and PIDA (170 mg, 0.533 mmol). A pink solid (95.2 mg, 0.293 mmol, 66%) was obtained after column chromatography (Hexane:Et<sub>2</sub>O 100:0 to 75:25). <sup>1</sup>H NMR (400 MHz, CDCl<sub>3</sub>) δ 10.22 (s, 1H), 5.47 (d, *J* = 7.8 Hz, 1H), 4.80 - 4.76 (m, 1H), 3.87 (dd, *J* = 14.7, 5.2 Hz, 1H), 3.75 (dd, *J* = 14.7, 7.3 Hz, 1H), 1.41 (s, 9H), 1.37 (s, 9H), peak at 5.13, 4.71 ppm due to minor rotamer. <sup>13</sup>C NMR (101 MHz, CDCl<sub>3</sub>) δ 170.01, 169.64, 158.19, 155.18, 83.21, 80.29, 52.83, 38.75, 28.35, 27.98. IR (KBr), ν/cm<sup>-1</sup> 3371, 2979, 2833, 1715, 1502, 1368, 1251, 155, 1058, 892, 845. HRMS [M+H]<sup>+</sup> *m/z* calcd. for [C<sub>14</sub>H<sub>24</sub>O<sub>4</sub>N<sub>5</sub>]<sup>+</sup> 326.1828, found 326.1817

**(S)-tert-butyl 2-((tert-butoxycarbonyl)amino)-4-(1,2,4,5-tetrazin-3-yl)butanoate (4i)**

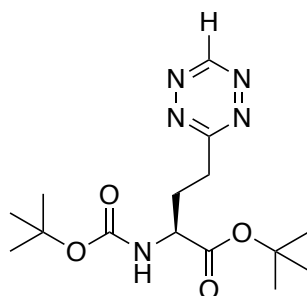

The general protocol for thioether reduction was followed using **3p** (291 mg, 0.755 mmol), PdCl<sub>2</sub> (13.4 mg, 0.0755 mmol), HSiEt<sub>3</sub> (360 μL, 2.26 mmol), THF (7.6 mL) and PIDA (293 mg, 0.906 mmol). A pink solid (200 mg, 0.589 mmol, 78%) was obtained after column chromatography (Hexane:EA 100:0 to 85:15). <sup>1</sup>H NMR (400 MHz, CDCl<sub>3</sub>) δ 10.20 (s, 1H), 5.17 (d, *J* = 8.2 Hz, 1H), 4.36 (app td, *J* = 8.2, 4.8 Hz, 1H), 3.50 – 3.35 (m, 2H), 2.58 – 2.49 (m, 1H), 2.29 – 2.20 (m, 1H), 1.47 (s, 9H), 1.42 (s, 9H), peak at 4.93, 4.19 ppm due to minor rotamer. <sup>13</sup>C NMR (151 MHz, CDCl<sub>3</sub>) δ 172.43, 171.22, 158.12, 155.44, 82.67, 80.09, 53.50, 31.60, 31.05, 28.43, 28.14. IR (KBr), ν/cm<sup>-1</sup> 3372, 2980, 2936, 1730, 1700, 1505, 1366, 1153, 1050, 893. HRMS [M+H]<sup>+</sup> *m/z* calcd. for [C<sub>15</sub>H<sub>26</sub>O<sub>4</sub>N<sub>5</sub>]<sup>+</sup> 340.1985, found 340.1973

**3-(1-((5-(trifluoromethyl)pyridin-2-yl)oxy)cyclopropyl)-1,2,4,5-tetrazine (4j)**

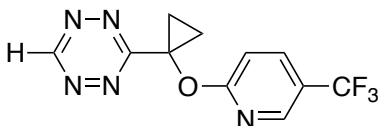

The general protocol for thioether reduction was followed using **3s** (40 mg, 0.12 mmol), PdCl<sub>2</sub> (2.1 mg, 0.012 mmol), HSiEt<sub>3</sub> (58 μL, 0.36 mmol), THF (1.2 mL) and PIDA (46 mg, 0.14 mmol). A pink solid (24 mg, 0.097 mmol, 71%) was obtained after column chromatography (Hexane:CH<sub>2</sub>Cl<sub>2</sub>:2 to 6:4). <sup>1</sup>H NMR (400 MHz, CDCl<sub>3</sub>) δ 10.15 (s, 1H), 8.23 – 8.22 (m, 1H), 7.85 (dd, *J* = 8.7, 2.4 Hz, 1H), 7.03 (d, *J* = 8.7 Hz, 1H), 2.07 (app dd, *J* = 8.8, 5.9 Hz, 2H), 1.78 (app dd, *J* = 8.7, 5.8 Hz, 2H). <sup>13</sup>C NMR (101 MHz, CDCl<sub>3</sub>) δ 172.18 (C), 164.80 (C), 157.72 (CH), 144.74 (CH, *q*, *J*<sub>C-F</sub> = 4.4 Hz), 136.41 (CH, *q*, *J*<sub>C-F</sub> = 3.3 Hz), 123.86 (C, *q*, *J*<sub>C-F</sub> = 269.7 Hz), 121.42 (C, *q*, *J*<sub>C-F</sub> = 33.0 Hz) 111.78 (CH), 59.35 (C), 20.50 (CH<sub>2</sub>). IR (KBr), ν/cm<sup>-1</sup> 3088, 2923, 2851, 1615, 1581, 1492, 1453, 1329, 1288, 1189, 1127, 1078. HRMS [M+H]<sup>+</sup> *m/z* calcd. for [C<sub>11</sub>H<sub>19</sub>ON<sub>5</sub>F<sub>3</sub>]<sup>+</sup> 284.0759, found 284.0749

**3-((1-phenyl-5-(trifluoromethyl)-1H-pyrazol-4-yl)methyl)-1,2,4,5-tetrazine (4k)**

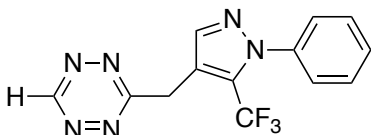

The general protocol for thioether reduction was followed using **3u** (53 mg, 0.15 mmol), PdCl<sub>2</sub> (2.7 mg, 0.015 mmol), HSiEt<sub>3</sub> (72 μL, 0.45 mmol), THF (1.5 mL) and PIDA (57 mg, 0.18 mmol). A pink solid (35 mg, 0.11 mmol, 75%) was obtained after column chromatography (CH<sub>2</sub>Cl<sub>2</sub>:Et<sub>2</sub>O 100:0 to 95:5). <sup>1</sup>H NMR (400 MHz, CDCl<sub>3</sub>) δ 10.27 (s, 1H), 7.74 (s, 1H), 7.50 – 7.44 (m, 5H), 4.78 (s, 2H). <sup>13</sup>C NMR (101 MHz, CDCl<sub>3</sub>) δ 170.99, 158.30, 141.26, 139.43, 130.11 (*q*, *J*<sub>C-F</sub> = 37.7 Hz), 129.67, 129.20, 126.11 (*q*, *J*<sub>C-F</sub> = 1.0 Hz), 120.38 (*q*, *J*<sub>C-F</sub> = 268.4 Hz) 117.47 (*q*, *J*<sub>C-F</sub> = 1.8 Hz), 30.62. IR (KBr), ν/cm<sup>-1</sup> 3077, 1924, 2853, 1598, 1503, 1472, 1309, 1183, 1132, 1091, 975. HRMS [M+H]<sup>+</sup> *m/z* calcd. for [C<sub>13</sub>H<sub>10</sub>N<sub>6</sub>F<sub>3</sub>]<sup>+</sup> 307.0919, found 307.0908

**(3R,5R,8R,9S,10S,13R,14S,17R)-17-((R)-4-(1,2,4,5-tetrazin-3-yl)butan-2-yl)-10,13-dimethylhexadecahydro-1H-cyclopenta[*a*]phenanthren-3-ol (4l)**

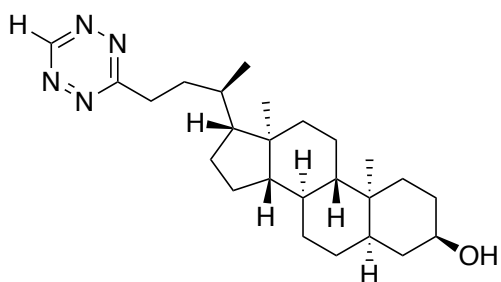

The general protocol for thioether reduction was followed using **3r** (180 mg, 0.39 mmol), PdCl<sub>2</sub> (7.0 mg, 0.039 mmol), HSiEt<sub>3</sub> (0.19 mL, 1.2 mmol), THF (3.9 mL) and PIDA (170 mg, 0.533 mmol). After aqueous work up and rotary evaporation, THF (1.0 mL), TFA (0.2 mL) and water (0.2 mL) was added into crude and stirred for 2 h at r.t. The resulting residue was concentrated. A pink solid (112 mg, 0.27 mmol, 70%) was obtained after column chromatography (CH<sub>2</sub>Cl<sub>2</sub>:Et<sub>2</sub>O 100:0 to 98:2). <sup>1</sup>H NMR (400 MHz, CDCl<sub>3</sub>) δ 10.19 (s, 1H), 3.63 (tt, *J* = 10.8, 5.3 Hz, 1H), 3.40 (ddd, *J* = 14.0, 10.8, 5.0 Hz, 1H), 3.24 (ddd, *J* = 14.0, 10.5, 6.1 Hz, 1H), 2.15 – 2.03 (m, 1H), 2.02 – 0.77 (m, 32H), 0.65 (s, 3H). <sup>13</sup>C NMR (101 MHz, CDCl<sub>3</sub>) δ 174.02, 158.05, 72.01, 56.61, 55.99, 42.94, 42.20, 40.54, 40.30, 36.58, 35.97, 35.83, 35.47, 35.00, 34.71, 32.46, 30.68, 29.86, 28.40, 27.31, 26.54, 24.33, 23.52, 20.96, 18.63, 12.21. IR (KBr), ν/cm<sup>-1</sup> 3366, 2959, 2934, 2830, 1653, 1527, 1267, 741. HRMS [M+H]<sup>+</sup> *m/z* calcd. for [C<sub>25</sub>H<sub>41</sub>ON<sub>4</sub>]<sup>+</sup> 413.3280, found 413.3254

**3-(2-(1,2,4,5-tetrazin-3-yl)ethyl)-5,5-difluoro-7,9-dimethyl-5H-dipyrrolo[1,2-c:2',1'-f][1,3,2]diazaborinin-4-ium-5-uide (4m)**

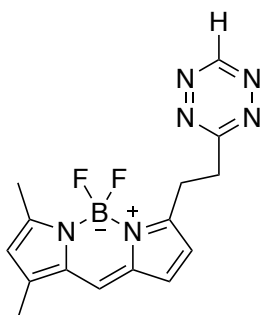

The general protocol for thioether reduction was followed using **3w** (16 mg, 0.043 mmol), PdCl<sub>2</sub> (0.76 mg, 0.0043 mmol), HSiEt<sub>3</sub> (21 μL, 0.13 mmol), THF (0.43 mL) and PIDA (17 mg, 0.051 mmol). An orange solid (8.5 mg, 0.026 mmol, 61%) was obtained after column chromatography (CH<sub>2</sub>Cl<sub>2</sub>:Et<sub>2</sub>O 100:0 to 98:2). <sup>1</sup>H NMR (400 MHz, CDCl<sub>3</sub>) δ 10.20 (s, 1H), 7.09 (s, 1H), 6.86 (d, *J* = 4.0 Hz, 1H), 6.24 (d, *J* = 4.0 Hz, 1H), 6.12 (s, 1H), 3.82 (app t, *J* = 7.6 Hz, 2H), 3.65 (app t, *J* = 7.6 Hz, 2H), 2.55 (s, 3H), 2.25 (s, 3H). <sup>13</sup>C NMR (101 MHz, CDCl<sub>3</sub>) δ 172.11, 161.38, 158.19, 155.49, 144.50, 135.67, 133.33, 127.89, 124.09, 120.89, 116.70, 34.68, 26.74, 15.17, 11.49. HRMS [M+H]<sup>+</sup> *m/z* calcd. for [C<sub>15</sub>H<sub>16</sub>N<sub>6</sub>BF<sub>2</sub>]<sup>+</sup> 329.1498, found 329.1483



## Synthesis of unsymmetrical tetrazines via Ag-mediated Liebeskind coupling with boronic acids

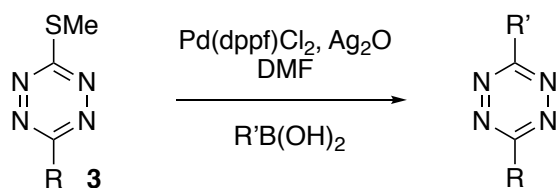

### *tert*-butyl ((6-(4-methoxyphenyl)-1,2,4,5-tetrazin-3-yl)methyl)carbamate (5a)

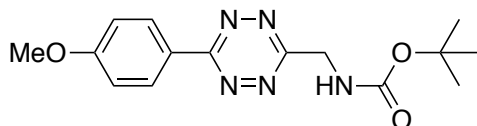

To a dry round bottomed flask was sequentially charged with **3n** (54 mg, 0.21 mmol), Pd(dppf)Cl<sub>2</sub> (23 mg, 0.031 mmol, 15 mol%), 4-methoxyphenylboronic acid (61 mg, 0.40 mmol) and Ag<sub>2</sub>O (122 mg, 0.52 mmol). The flask was outfitted with a septum-fitted gas inlet adapter, evacuated and filled with nitrogen. DMF (2.1 mL) was added to the flask via syringe. After heating under nitrogen at 60 °C for 20 h, the DMF was removed by rotary evaporation under high vacuum. The residue was purified by column chromatography (hexane:EA 10:0 to 8:2) to give the title compound as a pink solid (50 mg, 78%). <sup>1</sup>H NMR (400 MHz, CDCl<sub>3</sub>) δ 8.56 (app d, *J* = 9.0 Hz, 2H), 7.09 (app d, *J* = 9.0 Hz, 2H), 5.57 (s, 1H), 4.99 (d, *J* = 5.7 Hz, 2H), 3.92 (s, 3H), 1.47 (s, 9H). <sup>13</sup>C NMR (101 MHz, CDCl<sub>3</sub>) δ 165.83 (C), 164.82 (C), 163.68 (C), 155.91 (C), 130.15 (CH), 123.96 (C), 114.91 (CH), 80.47 (C), 55.69 (CH<sub>3</sub>), 43.53 (CH<sub>2</sub>), 28.47 (CH<sub>3</sub>). IR (KBr), ν/cm<sup>-1</sup> 3360, 3056, 2973, 2928, 1712, 1678, 1605, 1525, 1396, 1260, 1158. HRMS [M+H]<sup>+</sup> *m/z* calcd. for [C<sub>15</sub>H<sub>20</sub>O<sub>3</sub>N<sub>5</sub>]<sup>+</sup> 318.1566, found 318.1553

### methyl 3-(6-phenyl-1,2,4,5-tetrazin-3-yl)propanoate (5b)

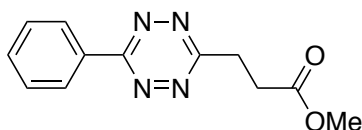

To a microwave reaction tube was sequentially charged with **3k** (54 mg, 0.25 mmol), Pd(dppf)Cl<sub>2</sub> (28 mg, 0.038 mmol, 15 mol%), phenylboronic acid (92 mg, 0.76 mmol), Ag<sub>2</sub>O (146 mg, 0.63 mmol) and DMF (2.5 mL) in glove box. After heating under nitrogen at 100 °C for 3 h, the DMF was removed by rotary evaporation under high vacuum. The residue was purified by column chromatography (hexane:EA 100:0 to 85:15) to give the title compound as pink solid (52 mg, 84%). <sup>1</sup>H NMR (400 MHz, CDCl<sub>3</sub>) δ 8.82 – 8.38 (m, 2H), 7.78 – 7.43 (m, 3H), 4.17 – 3.34 (m, 5H), 3.12 (app t, *J* = 7.1 Hz, 2H). <sup>13</sup>C NMR (101 MHz, CDCl<sub>3</sub>) δ 172.63 (C), 168.57 (C), 164.51 (C), 132.82 (CH), 131.80 (C), 129.40 (CH), 128.14 (CH), 52.19 (CH<sub>3</sub>), 30.77 (CH<sub>2</sub>), 29.83 (CH<sub>2</sub>). IR (KBr), ν/cm<sup>-1</sup> 3063, 3001, 2950, 2926, 1736, 1375, 1301, 1234, 1175, 758, 696. HRMS [M+H]<sup>+</sup> *m/z* calcd. for [C<sub>12</sub>H<sub>13</sub>O<sub>2</sub>N<sub>4</sub>]<sup>+</sup> 245.1039, found 245.1031

### methyl 4-(6-(4-(hydroxymethyl)phenyl)-1,2,4,5-tetrazin-3-yl)benzoate (5c)

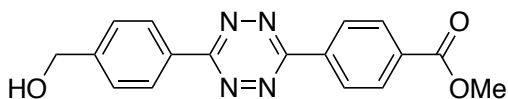

To a dry round bottomed flask was sequentially charged with **3g** (48 mg, 0.18 mmol), Pd(dppf)Cl<sub>2</sub> (20 mg, 0.028 mmol, 15 mol%), *p*-hydroxymethylphenylboronic acid (54 mg, 0.35 mmol) and Ag<sub>2</sub>O (107 mg, 0.46 mmol). The flask was outfitted with a septum-fitted gas inlet adapter, evacuated and filled with nitrogen. DMF (1.8 mL) was added to the flask via syringe. After heating under nitrogen at 60 °C for 20 h, the DMF was removed by rotary evaporation under high vacuum. The residue was purified by column chromatography (CH<sub>2</sub>Cl<sub>2</sub>:Et<sub>2</sub>O 100:0 to 93:7) to give the title compound as pink solid (35 mg, 59%). <sup>1</sup>H NMR (400 MHz, DMSO-*d*<sub>6</sub>) δ 8.67 (app d, *J* = 8.5 Hz, 2H), 8.53 (app d, *J* = 8.3 Hz, 2H), 8.26 (app d, *J* = 8.5 Hz, 2H), 7.64 (app d, *J* = 8.3 Hz, 2H), 5.47 (t, *J* = 5.5 Hz, 1H), 4.66 (d, *J* = 5.5 Hz, 2H), 3.93 (s, 3H). <sup>13</sup>C NMR (101 MHz, DMSO-*d*<sub>6</sub>) δ 165.73 (C), 163.37 (C), 162.79 (C), 147.98 (C), 136.19 (C), 132.75 (C), 130.19 (CH), 130.04 (C), 127.85 (CH), 127.67 (CH), 127.22 (CH), 62.49 (CH<sub>2</sub>), 52.60 (CH<sub>3</sub>). IR (KBr), ν/cm<sup>-1</sup> 3345, 3058, 3012, 2957, 2919, 1720, 1607, 1509, 1394, 1280, 1112, 1010, 697. HRMS [M+H]<sup>+</sup> *m/z* calcd. for [C<sub>17</sub>H<sub>15</sub>O<sub>3</sub>N<sub>4</sub>]<sup>+</sup> 323.1144, found 323.1132

**methyl 4-(6-(((*tert*-butoxycarbonyl)amino)methyl)phenyl)-1,2,4,5-tetrazin-3-yl)benzoate (5d)**

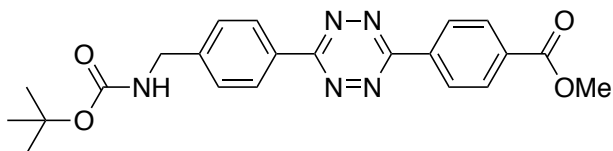

To a dry round bottomed flask was sequentially charged with **3g** (47 mg, 0.18 mmol), Pd(dppf)Cl<sub>2</sub> (20 mg, 0.027 mmol, 15 mol%), 4-(*tert*-Butoxycarbonylamino)methylphenylboronic acid (85 mg, 0.34 mmol) and Ag<sub>2</sub>O (103 mg, 0.45 mmol). The flask was outfitted with a septum-fitted gas inlet adapter, evacuated and filled with nitrogen. DMF (1.8 mL) was added to the flask via syringe. After heating under nitrogen at 60 °C for 20 h, the DMF was removed by rotary evaporation under high vacuum. The residue was purified by column chromatography (CH<sub>2</sub>Cl<sub>2</sub>:Et<sub>2</sub>O 100:0 to 97:3) to give the title compound as a pink solid (61 mg, 81%). <sup>1</sup>H NMR (400 MHz, DMSO-*d*) δ 8.67 (app d, *J* = 8.4 Hz, 2H), 8.52 (app d, *J* = 8.1 Hz, 2H), 8.26 (app d, *J* = 8.4 Hz, 2H), 7.56 (m, 3H), 4.28 (d, *J* = 6.0 Hz, 2H), 3.93 (s, 3H), 1.42 (s, 9H). <sup>13</sup>C NMR (101 MHz, DMSO) δ 165.72 (C), 163.32 (C), 162.80 (C), 145.51 (C), 136.17 (C), 132.76 (C), 130.18 (CH), 130.15 (C), 127.93 (CH), 127.85 (CH), 127.76 (C), 78.06 (C), 52.59 (CH<sub>3</sub>), 43.30 (CH<sub>2</sub>), 28.28 (CH<sub>3</sub>). IR (KBr), ν/cm<sup>-1</sup> 3348, 3081, 3008, 2984, 2947, 1722, 1683, 1606, 1512, 1394, 1277, 1250, 1168, 1111. HRMS [M+H]<sup>+</sup> *m/z* calcd. for [C<sub>22</sub>H<sub>24</sub>O<sub>4</sub>N<sub>5</sub>]<sup>+</sup> 422.1828, found 422.1815

***tert*-butyl 3-(6-(4-chlorophenyl)-1,2,4,5-tetrazin-3-yl)propanoate (5e)**

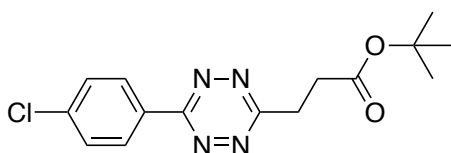

To a dry round bottomed flask was sequentially charged with **3i** (70 mg, 0.27 mmol), Pd(dppf)Cl<sub>2</sub> (30 mg, 0.040 mmol, 15 mol%), 4-chlorophenylboronic acid (80 mg, 0.51 mmol) and Ag<sub>2</sub>O (156 mg, 0.67 mmol). The flask was outfitted with a septum-fitted gas inlet adapter, evacuated and filled with nitrogen. DMF (2.7 mL) was added to the flask via syringe. After heating under nitrogen at 60 °C for 20 h, the DMF was removed by rotary evaporation under high vacuum. The residue was purified by column chromatography (hexane:EA 10:0 to 9:1) to give the title compound as pink solid (67 mg, 78%). <sup>1</sup>H NMR (400 MHz, CDCl<sub>3</sub>): δ 8.55 (m, 2H), 7.57 (m, 2H), 3.65 (app t, *J* = 7.1Hz, 2H), 3.01 (app t, *J* = 7.1Hz, 2H), 1.42 (s, 9H). <sup>13</sup>C NMR (101 MHz, CDCl<sub>3</sub>): δ 171.31 (C), 169.09 (C), 163.77 (C), 139.30 (C), 130.38 (C), 129.76 (CH), 129.37 (CH), 81.30 (C), 32.33(CH<sub>2</sub>), 30.15 (CH<sub>2</sub>), 28.18 (CH<sub>3</sub>). IR (KBr), ν/cm<sup>-1</sup> 3055, 2980, 2932, 1730, 1598, 1398, 1366, 1265, 1153, 1095, 848, 738. HRMS (ESI+) [M+H]<sup>+</sup> Calculated for [C<sub>15</sub>H<sub>18</sub>O<sub>2</sub>N<sub>4</sub>Cl]<sup>+</sup> 321.1118; found 321.1114

***tert*-butyl 3-(6-(4-(2*H*-1,2,3-triazol-2-yl)phenyl)-1,2,4,5-tetrazin-3-yl)propanoate (5f)**

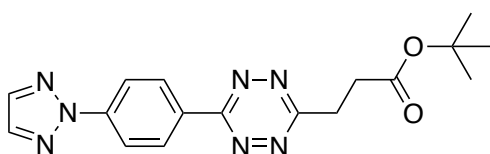

To a dry round bottomed flask was sequentially charged with **3i** (80 mg, 0.31 mmol), Pd(dppf)Cl<sub>2</sub> (34 mg, 0.047 mmol, 15 mol%), 4-(triazol-2-yl)phenylboronic acid (112 mg, 0.59 mmol) and Ag<sub>2</sub>O (181 mg, 0.67 mmol). The flask was outfitted with a septum-fitted gas inlet adapter, evacuated and filled with nitrogen. DMF (3.1 mL) was added to the flask via syringe. After heating under nitrogen at 60 °C for 20 h, the DMF was removed by rotary evaporation under high vacuum. The residue was purified by column chromatography (Hexane:EA 10:0 to 90:1) to give the title compound as pink solid (66 mg, 60%). <sup>1</sup>H NMR (400 MHz, CDCl<sub>3</sub>): δ 8.75 (m, 2H), 8.33 (m, 2H), 7.89 (s, 2H), 3.66 (app t, *J* = 7.1Hz, 2H), 3.03 (app t, *J* = 7.1Hz, 2H), 1.43 (s, 9H). <sup>13</sup>C NMR (101 MHz, CDCl<sub>3</sub>): δ 171.33 (C), 169.02 (C), 163.76 (C), 142.82 (C), 136.48 (CH), 130.82 (C), 129.37 (CH), 119.56 (CH), 81.30 (C), 32.38 (CH<sub>2</sub>), 30.17 (CH<sub>2</sub>), 28.20 (CH<sub>3</sub>). IR (KBr), ν/cm<sup>-1</sup> 3089, 3005, 2977, 2915, 2848, 1720, 1605, 1403, 1365, 1263, 945. HRMS (ESI+) [M+H]<sup>+</sup> Calculated for [C<sub>17</sub>H<sub>20</sub>O<sub>2</sub>N<sub>7</sub>]<sup>+</sup> 354.1678; found 354.1674.

**tert-butyl 3-(6-(4-((5-(trifluoromethyl)pyridin-2-yl)oxy)phenyl)-1,2,4,5-tetrazin-3-yl)propanoate (5g)**

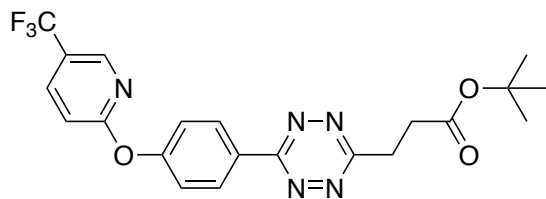

To a dry round bottomed flask was sequentially charged with **3i** (60 mg, 0.23 mmol), Pd(dppf)Cl<sub>2</sub> (26 mg, 0.035 mmol, 15 mol%), 3-((5-(trifluoromethyl)pyridin-2-yl)oxy)phenylboronic acid (198 mg, 0.70 mmol) and Ag<sub>2</sub>O (135 mg, 0.59 mmol). The flask was outfitted with a septum-fitted gas inlet adapter, evacuated and filled with nitrogen. DMF (2.3 mL) was added to the flask via syringe. After heating under nitrogen at 60 °C for 20 h, the DMF was removed by rotary evaporation under high vacuum. The residue was purified by column chromatography (Hexane:EA 10:0 to 90:1) to give the title compound as pink solid (68 mg, 65%). <sup>1</sup>H NMR (400 MHz, CDCl<sub>3</sub>) δ 8.55 – 8.50 (m, 1H), 8.46 – 8.43 (m, 1H), 8.42 – 8.39 (m, 1H), 7.99 – 7.93 (m, 1H), 7.67 (t, *J* = 8.0 Hz, 1H), 7.46 – 7.40 (m, 1H), 7.16 – 7.08 (m, 1H), 3.65 (app. t, *J* = 7.1 Hz, 2H), 3.01 (app. t, *J* = 7.1 Hz, 2H), 1.41 (s, 9H). <sup>13</sup>C NMR (101 MHz, CDCl<sub>3</sub>): δ 171.28 (C), 169.17 (C), 165.47 (C, q, *J*<sub>C-F</sub> = 1.1Hz), 163.75 (C), 154.03 (C), 145.50 (q, *J*<sub>C-F</sub> = 4.4Hz, CH), 137.06 (q, *J*<sub>C-F</sub> = 3.1Hz, CH), 133.68 (C), 130.81 (CH), 125.88 (CH), 125.02 (CH), 123.71 (q, *J*<sub>C-F</sub> = 272.5 Hz, C), 122.01 (q, *J*<sub>C-F</sub> = 33.5Hz, C), 121.1 (CH), 111.9 (CH), 81.26 (C), 32.36 (CH<sub>2</sub>), 30.10 (CH<sub>2</sub>), 28.12 (CH<sub>3</sub>). IR (KBr), ν/cm<sup>-1</sup> 3005, 2932, 1724, 1614, 1589, 1489, 1394, 1328, 1262, 1130, 1078, 757, 689. HRMS (ESI+) [M+H]<sup>+</sup> Calculated for [C<sub>21</sub>H<sub>21</sub>O<sub>3</sub>N<sub>5</sub>F<sub>3</sub>]<sup>+</sup> 448.1596 found 448.1599.

**methyl 4-(6-(((tert-butoxycarbonyl)amino)methyl)-1,2,4,5-tetrazin-3-yl)benzoate (5h)**

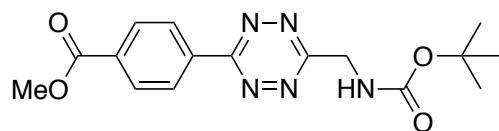

To a microwave reaction tube was sequentially charged with **3n** (57 mg, 0.22 mmol), Pd(dppf)Cl<sub>2</sub> (24 mg, 0.033 mmol, 15 mol%), 4-methoxycarbonylphenylboronic acid (120 mg, 0.66 mmol), Ag<sub>2</sub>O (128 mg, 0.55 mmol) and DMF (2.2 mL) in glove box. After heating under nitrogen at 100 °C for 3 h, the DMF was removed by rotary evaporation under high vacuum. The residue was purified by column chromatography (CH<sub>2</sub>Cl<sub>2</sub>:Et<sub>2</sub>O 100:0 to 95:5) to give the title compound as pink solid (53 mg, 69%). <sup>1</sup>H NMR (400 MHz, CDCl<sub>3</sub>) δ 8.67 (app d, *J* = 8.3 Hz, 2H), 8.24 (app d, *J* = 8.3 Hz, 2H), 5.62 (s, 1H), 5.05 (d, *J* = 5.8 Hz, 2H), 3.98 (s, 3H), 1.47 (s, 9H). <sup>13</sup>C NMR (101 MHz, CDCl<sub>3</sub>) δ 166.95 (C), 166.42 (C), 164.59 (C), 155.95 (C), 135.52 (C), 133.95 (C), 130.52 (CH), 128.20 (CH), 80.63 (C), 52.67 (CH<sub>2</sub>), 43.67 (CH<sub>3</sub>), 28.45 (CH<sub>3</sub>). IR (KBr), ν/cm<sup>-1</sup> 3070, 2979, 2930, 1723, 1697, 1515, 1367, 1281, 1251, 1171, 1110. HRMS [M+H]<sup>+</sup> *m/z* calcd. for [C<sub>16</sub>H<sub>20</sub>O<sub>4</sub>N<sub>5</sub>]<sup>+</sup> 346.1515, found 346.1503

**methyl 3-(6-(3-cyanophenyl)-1,2,4,5-tetrazin-3-yl)propanoate (5i)**

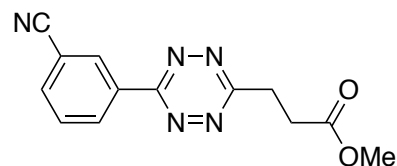

To a microwave reaction tube was sequentially charged with **3k** (55 mg, 0.26 mmol), Pd(dppf)Cl<sub>2</sub> (28 mg, 0.038 mmol, 15 mol%), 3-cyanophenylboronic acid (112 mg, 0.76 mmol), Ag<sub>2</sub>O (147 mg, 0.64 mmol) and DMF (2.5 mL) in glove box. After heating under nitrogen at 100 °C for 3 h, the DMF was removed by rotary evaporation under high vacuum. The residue was purified by column chromatography (Hexane:EA 100:0 to 75:25) to give the title compound as pink solid (42 mg, 61%). <sup>1</sup>H NMR (600 MHz, CDCl<sub>3</sub>) δ 8.92 (app t, *J* = 1.7 Hz, 1H), 8.84 (ddd, *J* = 7.9, 1.7, 1.2 Hz, 1H), 7.91 (app dt, *J* = 7.9, 1.2 Hz, 1H), 7.74 (td, *J* = 7.9, 0.6 Hz, 1H), 3.74 (app t, *J* = 7.0 Hz, 2H), 3.71 (s, 3H), 3.13 (app t, *J* = 7.0 Hz, 2H). <sup>13</sup>C NMR (101 MHz, CDCl<sub>3</sub>) δ 172.51 (C), 169.41 (C), 162.96 (C), 135.74 (CH), 133.20 (C), 131.91 (CH), 131.54 (CH), 130.34 (CH), 118.05 (C), 113.90 (C), 52.20 (CH<sub>3</sub>), 30.58 (CH<sub>2</sub>), 29.89 (CH<sub>2</sub>). IR (KBr), ν/cm<sup>-1</sup> 3079, 2954, 2924, 2232, 1737, 1603, 1437, 1396, 1369, 1198, 1176, 905, 687. HRMS [M+H]<sup>+</sup> *m/z* calcd. for [C<sub>13</sub>H<sub>12</sub>O<sub>2</sub>N<sub>5</sub>]<sup>+</sup> 270.0991, found 270.0981

(S)-tert-butyl 2-((tert-butoxycarbonyl)amino)-4-(6-(4-(trifluoromethyl)phenyl)-1,2,4,5-tetrazin-3-yl)butanoate (5j)

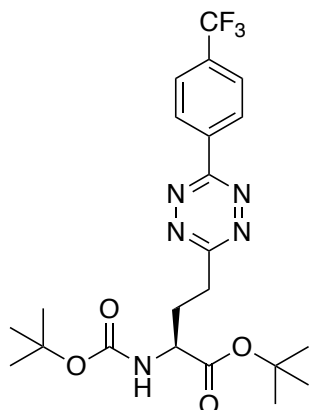

To a microwave reaction tube was sequentially charged with **3p** (72 mg, 0.19 mmol), Pd(dppf)Cl<sub>2</sub> (21 mg, 0.028 mmol, 15 mol%), 4-trifluoromethylboronic acid (107 mg, 0.56 mmol), Ag<sub>2</sub>O (108 mg, 0.47 mmol) and DMF (1.9 mL) in glove box. After heating under nitrogen at 100 °C for 3 h, the DMF was removed by rotary evaporation under high vacuum. The residue was purified by column chromatography (CH<sub>2</sub>Cl<sub>2</sub>:Et<sub>2</sub>O 100:0 to 97:3) to give the title compound as pink solid (37 mg, 56%). <sup>1</sup>H NMR (400 MHz, CDCl<sub>3</sub>) δ 8.73 (app d, *J* = 8.2 Hz, 2H), 7.86 (app d, *J* = 8.2 Hz, 2H), 5.17 (d, *J* = 8.0 Hz, 1H), 4.40 (app dt, *J* = 8.0, 4.9 Hz, 1H), 3.72 - 3.32 (m, 2H), 2.65 - 2.49 (m, 1H), 2.38 - 2.20 (m, 1H), 1.49 (s, 9H), 1.41 (s, 9H), peak at 4.92, 4.24 ppm due to minor rotamer. <sup>13</sup>C NMR (101 MHz, CDCl<sub>3</sub>) δ 171.26 (C), 170.03 (C), 163.46 (C), 155.45 (C), 135.17 (C), 134.26 (q, *J*<sub>C-F</sub> = 32.7 Hz, C), 128.39 (CH), 126.30 (q, *J*<sub>C-F</sub> = 1.9 Hz, CH), 123.83 (q, *J*<sub>C-F</sub> = 271.0 Hz, C), 82.72 (C), 80.11 (C), 53.50 (CH), 31.18 (CH<sub>2</sub>), 28.40 (CH<sub>3</sub>), 28.14 (CH<sub>3</sub>). IR (KBr), ν/cm<sup>-1</sup> 3378, 3063, 2980, 2932, 1713, 1502, 1395, 1368, 1325, 1168, 1138, 1069, 859, 606. HRMS [M+H]<sup>+</sup> *m/z* calcd. for [C<sub>22</sub>H<sub>29</sub>O<sub>4</sub>N<sub>5</sub>F<sub>3</sub>]<sup>+</sup> 484.2172, found 484.2160

## Synthesis of furyl-substituted tetrazines via Ag-mediated Liebeskind coupling with 3-furanboronic acid

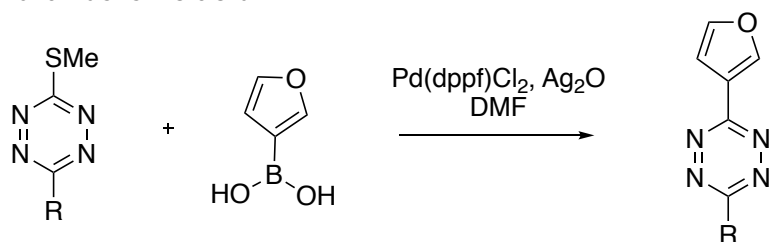

To a microwave reaction tube was sequentially charged with tetrazine thioether **3** (1 equiv.) Pd(dppf)Cl<sub>2</sub> (30 mol%), 3-furanboronic acid (6 equiv.), Ag<sub>2</sub>O (5 equiv.) and DMF (0.05 M) in glove box. After heating under nitrogen at 100 °C for 3 h, the DMF was removed by rotary evaporation under high vacuum. Mixture of product and unreacted starting material was collect by flash column chromatography on silica gel and concentrated by rotary evaporation. **Purification method A: oxidizing unreacted starting material.** To a dry round bottom flask was charged with the mixture and CH<sub>2</sub>Cl<sub>2</sub> (0.1 M). *m*CPBA (0.3 equiv.) was added at 0 °C. After stirring at 0 °C for 2 h, 5% sodium bisulfite aqueous solution was added to quench excessive *m*CPBA. Aqueous and organic layers were separated. Aqueous layer was extracted by CH<sub>2</sub>Cl<sub>2</sub> twice. All organic layers were combined, sequentially washed with saturate sodium bicarbonate solution, water, brine, dried over sodium sulfate and concentrated by rotary evaporation. The residue was purified by flash column chromatography on silica gel. **Purification method B: reverse phase chromatography.** Two 14 g YAMAZEN C18 columns were stacked. Tetrazine mixture was dissolved in minimum amount of methanol, diluted by water and loaded on column. H<sub>2</sub>O:MeOH 10:0 to 0:10 was used as the eluent, flow rate 15 mL/min.

### (2S,3S)-*tert*-butyl 2-(6-(furan-3-yl)-1,2,4,5-tetrazin-3-yl)-3-(pyridin-4-ylmethyl)pyrrolidine-1-carboxylate (**5k**)

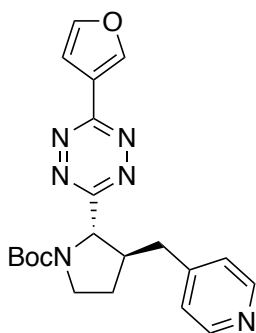

The general protocol was followed with **3v** (21 mg, 0.054 mmol), Pd(dppf)Cl<sub>2</sub> (12 mg, 0.016 mmol), 3-furanboronic acid (36 mg, 0.32 mmol), Ag<sub>2</sub>O (63 mg, 0.27 mmol) and DMF (1.1 ml). A pink solid (13 mg, 0.033 mmol, 60%) was obtained following purification method B. Two rotamers: <sup>1</sup>H NMR (400 MHz, CDCl<sub>3</sub>) δ 8.57 – 8.43 (m, 6H), 7.63 (s, 1H), 7.61 (s, 1H), 7.23 (s, 1H), 7.21 (s, 1H), 7.10 (app d, *J* = 4.5 Hz, 2H), 7.06 (app d, *J* = 4.5 Hz, 2H), 5.08 (d, *J* = 4.8 Hz, 1H), 4.94 (d, *J* = 5.9 Hz, 1H), 3.92 – 3.66 (m, 4H), 3.09 – 2.72 (m, 6H), 2.08 – 2.03 (m, 2H), 1.87 – 1.69 (m, 2H), 1.40 (s, 9H), 1.11 (s, 9H). <sup>13</sup>C NMR (101 MHz, CDCl<sub>3</sub>) δ 170.35 (C), 169.89 (C), 162.37 (C), 162.28 (C), 154.45 (C), 153.37 (C), 150.08 (CH, both rotamers), 147.80 (C), 147.70 (C), 146.24 (CH), 146.12 (CH), 145.18 (CH), 145.01 (CH), 124.45 (CH), 124.33 (CH), 121.13 (C), 120.88 (C), 108.78 (CH, both rotamers), 80.50 (C, both rotamers), 65.42 (CH), 65.16 (CH), 48.41 (CH), 47.23 (CH), 46.40 (CH<sub>2</sub>), 46.30 (CH<sub>2</sub>), 37.83 (CH<sub>2</sub>, both rotamers), 29.79 (CH<sub>2</sub>), 29.70 (CH<sub>2</sub>), 28.49 (CH<sub>3</sub>), 28.24 (CH<sub>3</sub>). IR (KBr), ν/cm<sup>-1</sup> 3128, 3027, 2976, 2930, 1696, 1600, 1515, 1389, 1367, 1161, 1126, 1081, 935, 878, 736. HRMS [M+H]<sup>+</sup> *m/z* calcd. for [C<sub>21</sub>H<sub>25</sub>O<sub>3</sub>N<sub>6</sub>]<sup>+</sup> 409.1988, found 409.1976

### methyl 3-(6-(furan-3-yl)-1,2,4,5-tetrazin-3-yl)propanoate (**5l**)

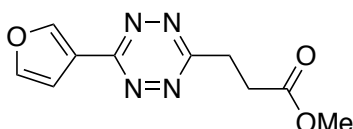

The general protocol was followed with **3k** (42 mg, 0.20 mmol), Pd(dppf)Cl<sub>2</sub> (43 mg, 0.059 mmol), 3-furanboronic acid (132 mg, 1.2 mmol), Ag<sub>2</sub>O (227 mg, 0.98 mmol) and DMF (3.9 ml). A pink solid (28 mg, 0.12 mmol, 61%) was obtained following purification method A after column chromatography (Hexane:EA 100:0 to 85:15). <sup>1</sup>H NMR (400 MHz, CDCl<sub>3</sub>) δ 8.51 - 8.50 (m, 1H), 7.61 (app t, *J* = 1.7 Hz, 1H), 7.22 (dd, *J* = 1.8, 0.8 Hz, 1H), 3.70 (s, 3H), 3.66 (app t, *J* = 7.1 Hz, 2H), 3.08 (app t, *J* = 7.1 Hz, 2H). <sup>13</sup>C NMR (101 MHz, CDCl<sub>3</sub>) δ 172.62 (C), 168.22 (C), 162.07 (C), 145.99 (CH), 145.03 (CH), 121.10 (C), 108.76 (CH), 52.18 (CH<sub>3</sub>), 30.76 (CH<sub>2</sub>), 29.89 (CH<sub>2</sub>). IR (KBr), ν/cm<sup>-1</sup> 3145, 2931, 1730, 1591, 1258, 1194, 1168, 1084. HRMS [M+H]<sup>+</sup> *m/z* calcd. for [C<sub>10</sub>H<sub>11</sub>O<sub>3</sub>N<sub>4</sub>]<sup>+</sup> 235.0831, found 235.0823

**(S)-tert-butyl 2-((tert-butoxycarbonyl)amino)-4-(6-(furan-3-yl)-1,2,4,5-tetrazin-3-yl)butanoate (5m)**

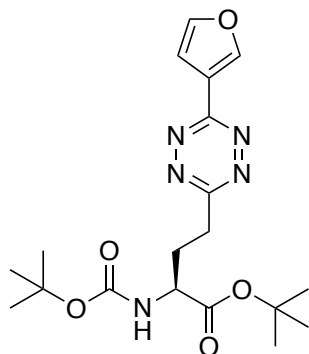

The general protocol was followed with **3p** (75 mg, 0.19 mmol), Pd(dppf)Cl<sub>2</sub> (43 mg, 0.058 mmol), 3-furanboronic acid (131 mg, 1.2 mmol), Ag<sub>2</sub>O (225 mg, 0.97 mmol) and DMF (3.9 ml). A pink solid (43 mg, 0.11 mmol, 56%) was obtained following purification method A after column chromatography (Hexane:EA 100:0 to 85:15). <sup>1</sup>H NMR (400 MHz, CDCl<sub>3</sub>) δ 8.53 (dd, *J* = 1.8, 0.8 Hz, 1H), 7.64 (app t, *J* = 1.7 Hz, 1H), 7.25 (dd, *J* = 1.8, 0.8 Hz, 1H), 5.18 (d, *J* = 8.2 Hz, 1H), 4.41 (app td, *J* = 7.9, 4.8 Hz, 1H), 3.51 - 3.35 (m, 2H), 2.71 - 2.46 (m, 1H), 2.32 - 2.23 (m, 1H), 1.51 (s, 9H), 1.45 (s, 9H), peak at 4.94, 4.24 ppm due to minor rotamer. <sup>13</sup>C NMR (101 MHz, CDCl<sub>3</sub>) δ 171.33 (C), 169.12 (C), 161.95 (C), 155.44 (C), 145.93 (CH), 145.02 (CH), 121.13 (C), 108.76 (CH), 82.65 (C), 80.08 (C), 53.57 (CH), 31.26 (CH<sub>2</sub>), 31.19 (CH<sub>2</sub>), 28.43 (CH<sub>3</sub>), 28.15 (CH<sub>3</sub>). IR (KBr), ν/cm<sup>-1</sup> 3366, 3131, 2979, 2933, 1715, 1589, 1515, 1368, 1250, 1159, 873. HRMS [M+H]<sup>+</sup> *m/z* calcd. for [C<sub>19</sub>H<sub>28</sub>O<sub>5</sub>N<sub>5</sub>]<sup>+</sup> 406.2090, found 406.2079

**tert-butyl ((6-(furan-3-yl)-1,2,4,5-tetrazin-3-yl)methyl)carbamate (5n)**

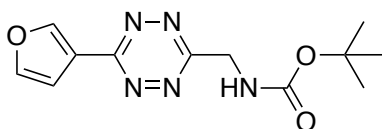

The general protocol was followed with **3n** (50 mg, 0.19 mmol), Pd(dppf)Cl<sub>2</sub> (43 mg, 0.058 mmol), 3-furanboronic acid (130 mg, 1.2 mmol), Ag<sub>2</sub>O (225 mg, 0.97 mmol) and DMF (3.9 ml). A pink solid (34 mg, 0.12 mmol, 62%) was obtained following purification method A after column chromatography (Hexane:EA 10:0 to 8:2). <sup>1</sup>H NMR (400 MHz, CDCl<sub>3</sub>) δ 8.52 - 8.52 (m, 1H), 7.61 (app t, *J* = 1.8 Hz, 1H), 7.21 (app d, *J* = 1.8 Hz, 1H), 5.60 (s, 1H), 4.96 (d, *J* = 6.0 Hz, 2H), 1.45 (s, 9H). <sup>13</sup>C NMR (101 MHz, CDCl<sub>3</sub>) δ 166.20 (C), 162.65 (C), 155.92 (C), 146.23 (CH), 145.07 (CH), 120.94 (C), 108.72 (CH), 80.45 (C), 43.61 (CH<sub>2</sub>), 28.42 (CH<sub>3</sub>). IR (KBr), ν/cm<sup>-1</sup> 3360, 3138, 2979, 2931, 1711, 1588, 1368, 1250, 1161. HRMS [M+H]<sup>+</sup> *m/z* calcd. for [C<sub>12</sub>H<sub>16</sub>O<sub>3</sub>N<sub>5</sub>]<sup>+</sup> 278.1253, found 278.1242

**(S)-tert-butyl (1-(6-(furan-3-yl)-1,2,4,5-tetrazin-3-yl)-2-(pyridin-4-yl)ethyl)carbamate (5o)**

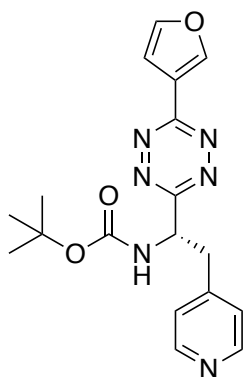

The general protocol was followed with **3t** (18 mg, 0.052 mmol), Pd(dppf)Cl<sub>2</sub> (11 mg, 0.016 mmol), 3-furanboronic acid (35 mg, 0.31 mmol), Ag<sub>2</sub>O (60 mg, 0.26 mmol) and DMF (1.0 ml). A pink solid (9.0 mg, 0.024 mmol, 47%) was obtained following purification method B. <sup>1</sup>H NMR (400 MHz, CDCl<sub>3</sub>) δ 8.53 - 8.49 (m, 3H), 8.50 (app d, *J* = 5.0 Hz, 2H), 7.63 (app t, *J* = 1.8 Hz, 1H), 7.22 (app d, *J* = 1.8 Hz, 1H), 7.08 (app d, *J* = 5.0 Hz, 2H), 5.73 - 5.51 (m, 1H), 5.58 (d, *J* = 8.8 Hz, 1H), 3.46 (dd, *J* = 14.0, 5.9 Hz, 1H), 3.30 (dd, *J* = 14.0, 7.6 Hz, 1H), 1.40 (s, 9H). <sup>13</sup>C NMR (101 MHz, CDCl<sub>3</sub>) δ 167.81 (C), 162.69 (C), 155.05 (C), 150.14 (CH), 146.56 (CH), 145.24 (CH), 144.96 (C), 124.79 (CH), 120.85 (C), 108.76 (CH), 80.74 (C), 54.13 (CH), 40.85 (CH<sub>2</sub>), 28.36 (CH<sub>3</sub>). IR (KBr), ν/cm<sup>-1</sup> 3337, 3153, 3028, 2978, 2930, 1708, 1609, 1589, 1515, 1367, 1250, 1161. HRMS [M+H]<sup>+</sup> *m/z* calcd. for [C<sub>18</sub>H<sub>21</sub>O<sub>3</sub>N<sub>6</sub>]<sup>+</sup> 369.1675, found 369.1662

**(3aS,4S,6aR)-4-(4-(6-(furan-3-yl)-1,2,4,5-tetrazin-3-yl)butyl)tetrahydro-1H-thieno[3,4-d]imidazol-2(3H)-one (5p)**

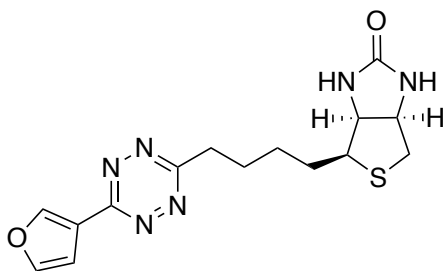

The general protocol was followed with **3q** (40 mg, 0.12 mmol), Pd(dppf)Cl<sub>2</sub> (27 mg, 0.037 mmol), 3-furanboronic acid (81 mg, 0.72 mmol), Ag<sub>2</sub>O (141 mg, 0.61 mmol) and DMF (2.4 ml). A pink solid (20 mg, 0.058 mmol, 48%) was obtained following purification method B. <sup>1</sup>H NMR (400 MHz, CDCl<sub>3</sub>) δ 8.49 - 8.48 (m, 1H), 7.61 (app t, *J* = 1.6 Hz, 1H), 7.21 (app d, *J* = 1.6 Hz, 1H), 6.12 (s, 1H), 5.32 (s, 1H), 4.53 (app dd, *J* = 7.4, 4.9 Hz, 1H), 4.33 (app dd, *J* = 7.4, 5.0 Hz, 1H), 3.34 (app t, *J* = 7.7 Hz, 2H), 3.20 3.15 (m, 1H), 2.91 (dd, *J* = 12.8, 5.0 Hz, 1H), 2.74 (d, *J* = 12.8 Hz, 1H), 2.09 - 1.93 (m, 2H), 1.91 - 1.69 (m, 2H), 1.70 - 1.48 (m, 2H). <sup>13</sup>C NMR (101 MHz, CDCl<sub>3</sub>) δ 169.71 (C), 163.60 (C), 161.95 (C), 145.86 (CH), 145.00 (CH), 121.13 (C), 108.75 (CH), 62.01 (CH), 60.23 (CH), 55.56 (CH), 40.70 (CH<sub>2</sub>), 34.49 (CH<sub>2</sub>), 28.40 (CH<sub>2</sub>), 28.36 (CH<sub>2</sub>), 28.33 (CH<sub>2</sub>). IR (KBr), ν/cm<sup>-1</sup> 3223, 3134, 2932, 2858, 1703, 1589, 1515, 1462, 1267, 1159, 872. HRMS [M+H]<sup>+</sup> *m/z* calcd. for [C<sub>15</sub>H<sub>19</sub>O<sub>2</sub>N<sub>6</sub>S]<sup>+</sup> 347.1290, found 347.1279

**Synthesis of vinyl ether-substituted tetrazine via Cu-mediated Liebeskind coupling with tributyl(1-ethoxyvinyl)tin**

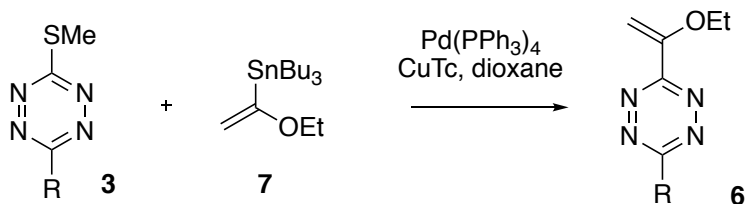

To a dry round-bottom flask was added tetrazine thioether **3** (1 equiv.), Pd(PPh<sub>3</sub>)<sub>4</sub> (15 mol%) and CuTc (2 equiv.) The flask was outfitted with a septum-fitted gas inlet adapter, and was twice evacuated and backfilled with nitrogen. Tributyl(1-ethoxyvinyl)tin **7** (2 equiv.) and anhydrous dioxane (5 mM in **3**) were added via syringe, and the flask was heated by an oil bath at 100 °C for 16-30 min. After cooling down, the reaction mixture was diluted with hexane and filtered through short pad of 10% K<sub>2</sub>CO<sub>3</sub> modified silica gel. Et<sub>2</sub>O was used to washed off all red fractions. The residue was concentrated by rotary evaporation and purified by flash column chromatography on 10% K<sub>2</sub>CO<sub>3</sub> modified silica gel.

**Vinylether tetrazines with alkyl substituents 6h-k was stored as 1-5 mM solution in CH<sub>2</sub>Cl<sub>2</sub> in -20 °C to prevent self-condensation.**

**3-(1-ethoxyvinyl)-6-phenyl-1,2,4,5-tetrazine (6a)**

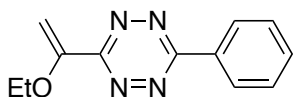

The general protocol was followed with **3x** (50 mg, 0.24 mmol), Pd(PPh<sub>3</sub>)<sub>4</sub> (43 mg, 0.037 mmol), CuTc (94 mg, 0.49 mmol), tributyl(1-ethoxyvinyl)tin (0.17 mL, 0.49 mmol) and 1,4-dioxane (49 mL) at 100 °C for 30 min. A pink solid (41 mg, 0.18 mmol, 74%) was obtained after column chromatography (CH<sub>2</sub>Cl<sub>2</sub>:Et<sub>2</sub>O 100:0 to 96:4). <sup>1</sup>H NMR (400 MHz, CDCl<sub>3</sub>) δ 8.63 (dd, *J* = 8.2, 1.6 Hz, 2H), 7.72 - 7.46 (m, 3H), 6.02 (d, *J* = 2.9 Hz, 1H), 4.93 (d, *J* = 2.9 Hz, 1H), 4.15 (q, *J* = 7.0 Hz, 2H), 1.55 (t, *J* = 7.0 Hz, 3H). <sup>13</sup>C NMR (101 MHz, CDCl<sub>3</sub>) δ 164.15 (C), 161.78 (C), 153.73 (C), 133.00 (CH), 131.74 (C), 129.44 (CH), 128.30 (CH), 93.16 (CH<sub>2</sub>), 64.67 (CH<sub>2</sub>), 14.51 (CH<sub>3</sub>). IR (KBr), ν/cm<sup>-1</sup> 3072, 2978, 2929, 1614, 1599, 1421, 1314, 1182, 1056. HRMS [M+H]<sup>+</sup> *m/z* calcd. for [C<sub>12</sub>H<sub>13</sub>ON<sub>4</sub>]<sup>+</sup> 229.1089, found 229.1082

**methyl 3-(6-(1-ethoxyvinyl)-1,2,4,5-tetrazin-3-yl)propanoate (6c)**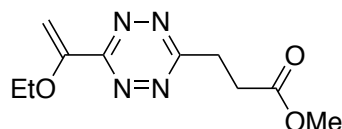

The general protocol was followed with **3k** (50 mg, 0.23 mmol), Pd(PPh<sub>3</sub>)<sub>4</sub> (40 mg, 0.035 mmol), CuTc (90 mg, 0.47 mmol), tributyl(1-ethoxyvinyl)tin (0.16 mL, 0.47 mmol) and 1,4-dioxane (47 mL) at 100 °C for 30 min. A pink oil (29 mg, 0.12 mmol, 52%) was obtained after column chromatography (CH<sub>2</sub>Cl<sub>2</sub>:Et<sub>2</sub>O 100:0 to 97:3). <sup>1</sup>H NMR (400 MHz, CDCl<sub>3</sub>) δ 5.97 (d, *J* = 2.9 Hz, 1H), 4.90 (d, *J* = 2.9 Hz, 1H), 4.12 (q, *J* = 7.0 Hz, 2H), 3.82 – 3.59 (m, 5H), 3.07 (app t, *J* = 7.1 Hz, 2H), 1.52 (t, *J* = 7.0 Hz, 3H). <sup>13</sup>C NMR (101 MHz, CDCl<sub>3</sub>) 172.52 (C), 168.84 (C), 162.13 (C), 153.57 (C), 93.19 (C), 64.65 (CH<sub>2</sub>), 52.15 (CH<sub>3</sub>), 30.66 (CH<sub>2</sub>), 29.84 (CH<sub>2</sub>), 14.45 (CH<sub>3</sub>). IR (KBr), ν/cm<sup>-1</sup> 2923, 2851, 1737, 1620, 1437, 1378, 1271, 1160, 1056, 847. HRMS [M+H]<sup>+</sup> *m/z* calcd. for [C<sub>10</sub>H<sub>15</sub>O<sub>3</sub>N<sub>4</sub>]<sup>+</sup> 239.1144, found 239.1123

**(3*R*,5*R*,8*R*,9*S*,10*S*,13*R*,14*S*,17*R*)-17-((*R*)-4-(6-(1-ethoxyvinyl)-1,2,4,5-tetrazin-3-yl)butan-2-yl)-10,13-dimethylhexadecahydro-1*H*-cyclopenta[*a*]phenanthren-3-ol (6b)**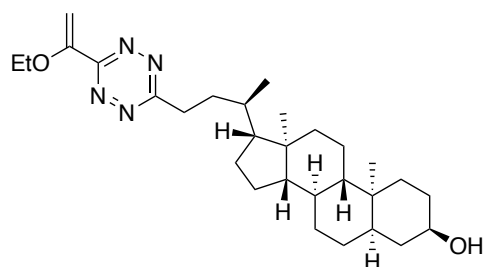

The general protocol was followed with **3r** (62 mg, 0.14 mmol), Pd(PPh<sub>3</sub>)<sub>4</sub> (23 mg, 0.020 mmol), CuTc (52 mg, 0.27 mmol), tributyl(1-ethoxyvinyl)tin (0.092 mL, 0.27 mmol) and 1,4-dioxane (27 mL) at 100 °C for 16 min. A pink oil (41 mg, 0.082 mmol, 61%) was obtained after column chromatography (CH<sub>2</sub>Cl<sub>2</sub>:Et<sub>2</sub>O 100:0 to 85:15). <sup>1</sup>H NMR (400 MHz, CDCl<sub>3</sub>) δ 5.94 (d, *J* = 2.9 Hz, 1H), 4.88 (d, *J* = 2.9 Hz, 1H), 4.11 (q, *J* = 7.0 Hz, 2H), 3.67 - 3.57 (m, 1H), 3.38 (ddd, *J* = 14.1, 10.5, 5.0 Hz, 1H), 3.23 (ddd, *J* = 14.1, 10.1, 6.4 Hz, 1H), 2.06 (dddd, *J* = 13.2, 10.1, 6.4, 2.7 Hz, 1H), 2.11 – 1.95 (m, 2H), 1.91 – 0.93 (m, 30H), 0.92 (s, 3H), 0.64 (s, 3H). <sup>13</sup>C NMR (101 MHz, CDCl<sub>3</sub>) δ 171.26, 161.93, 153.72, 92.82, 72.01, 64.62, 56.59, 56.07, 42.93, 42.20, 40.54, 40.30, 36.57, 35.96, 35.76, 35.47, 34.86, 34.70, 31.93, 30.68, 28.37, 27.31, 26.53, 24.33, 23.51, 20.95, 18.58, 14.46, 12.22. IR (KBr), ν/cm<sup>-1</sup> 3390, 2934, 2836, 1670, 1618, 1447, 1379, 1269, 1160, 1057, 736. HRMS [M+H]<sup>+</sup> *m/z* calcd. for [C<sub>29</sub>H<sub>47</sub>O<sub>2</sub>N<sub>4</sub>]<sup>+</sup> 483.3699, found 483.3685

**3-(1-ethoxyvinyl)-6-((1-phenyl-5-(trifluoromethyl)-1*H*-pyrazol-4-yl)methyl)-1,2,4,5-tetrazine (6d)**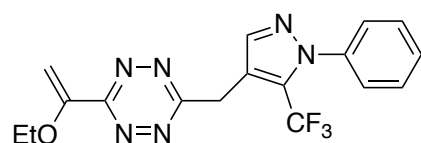

The general protocol was followed with **3u** (27 mg, 0.075 mmol), Pd(PPh<sub>3</sub>)<sub>4</sub> (13 mg, 0.011 mmol), CuTc (29 mg, 0.15 mmol), tributyl(1-ethoxyvinyl)tin (0.051 mL, 0.15 mmol) and 1,4-dioxane (15 mL) at 100 °C for 16 min. A pink oil (16 mg, 0.042 mmol, 57%) was obtained after column chromatography (CH<sub>2</sub>Cl<sub>2</sub>:Et<sub>2</sub>O 100:0 to 97:3). <sup>1</sup>H NMR (400 MHz, CDCl<sub>3</sub>) δ 7.73 (s, 1H), 7.60 – 7.38 (m, 5H), 6.01 (d, *J* = 2.9 Hz, 1H), 4.93 (d, *J* = 2.9 Hz, 1H), 4.76 (s, 2H), 4.12 (q, *J* = 7.0 Hz, 2H), 1.52 (t, *J* = 7.0 Hz, 3H). <sup>13</sup>C NMR (101 MHz, CDCl<sub>3</sub>) δ 168.28 (C), 162.13 (C), 153.44 (C), 141.24 (CH), 139.49 (C), 130.63 (q, *J*<sub>C-F</sub> = 37.8 Hz, C), 129.61 (CH), 129.17 (CH), 126.13 (q, *J*<sub>C-F</sub> = 0.8 Hz, CH), 120.30 (q, *J*<sub>C-F</sub> = 268.7 Hz, C), 117.74 (q, *J*<sub>C-F</sub> = 1.5 Hz, C), 93.64 (C), 64.71 (CH<sub>2</sub>), 30.12 (CH<sub>2</sub>), 30.10 (CH<sub>2</sub>), 14.45 (CH<sub>3</sub>). IR (KBr), ν/cm<sup>-1</sup> 3064, 2983, 2930, 1618, 1598, 1502, 1398, 1310, 1184, 1159, 1132, 1091, 1053, 975, 768, 695. HRMS [M+H]<sup>+</sup> *m/z* calcd. for [C<sub>17</sub>H<sub>16</sub>ON<sub>6</sub>F<sub>3</sub>]<sup>+</sup> 377.1338, found 377.1317



**3-(2-(6-(1-ethoxyvinyl)-1,2,4,5-tetrazin-3-yl)ethyl)-5,5-difluoro-7,9-dimethyl-5H-dipyrrolo[1,2-c:2',1'-f][1,3,2]diazaborinin-4-ium-5-uide (6e)**

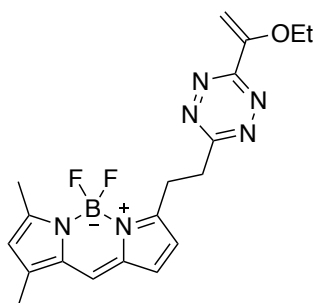

The general protocol was followed with **3w** (20 mg, 0.053 mmol), Pd(PPh<sub>3</sub>)<sub>4</sub> (9.3 mg, 0.0080 mmol), CuTc (21 mg, 0.11 mmol), tributyl(1-ethoxyvinyl)tin (0.038 mL, 0.11 mmol) and 1,4-dioxane (11 mL) at 100 °C for 16 min. An orange solid (10 mg, 0.026 mmol, 47%) was obtained after column chromatography (CH<sub>2</sub>Cl<sub>2</sub>:Et<sub>2</sub>O 100:0 to 99:1). <sup>1</sup>H NMR (600 MHz, CDCl<sub>3</sub>) δ 7.08 (s, 1H), 6.85 (d, *J* = 4.0 Hz, 1H), 6.24 (d, *J* = 4.0 Hz, 1H), 6.11 (s, 1H), 5.95 (d, *J* = 2.9 Hz, 1H), 4.89 (d, *J* = 2.9 Hz, 1H), 4.12 (q, *J* = 7.0 Hz, 2H), 3.81 (app t, *J* = 7.6 Hz, 2H), 3.66 (app t, *J* = 7.6 Hz, 2H), 2.56 (s, 3H), 2.25 (s, 3H), 1.52 (t, *J* = 7.0 Hz, 3H). <sup>13</sup>C NMR (101 MHz, CDCl<sub>3</sub>) δ 169.44 (C), 162.05 (C), 161.14 (C), 155.94 (C), 153.69 (C), 144.31 (C), 133.59 (C), 127.95 (CH), 124.05 (CH), 120.78 (CH), 116.79 (CH), 93.13 (C), 64.63 (CH<sub>2</sub>), 34.03 (CH<sub>2</sub>), 26.67 (CH<sub>2</sub>), 15.15 (CH<sub>3</sub>), 14.47 (CH<sub>3</sub>), 11.49 (CH<sub>3</sub>). HRMS [M+H]<sup>+</sup> *m/z* calcd. for [C<sub>19</sub>H<sub>22</sub>ON<sub>6</sub>F<sub>2</sub>B]<sup>+</sup> 399.1916, found 399.1898

## Synthesis of new MAGL probes

### 1,1,1,3,3,3-hexafluoropropan-2-yl 4-(((4-(methoxycarbonyl)phenyl)sulfonamido)methyl)piperidine-1-carboxylate

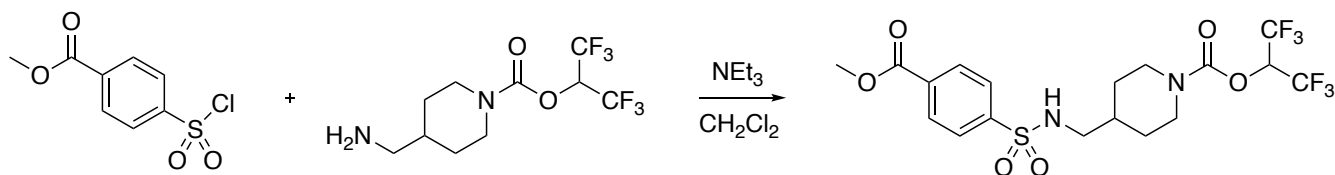

A round bottom flask was charged with 1,1,1,3,3,3-hexafluoropropan-2-yl 4-(aminomethyl)piperidine-1-carboxylate hydrochloride (1.30 g, 3.8 mmol) and methyl 4-(chlorosulfonyl)benzoate (1.77 g, 7.54 mmol). The flask was outfitted with a septum-fitted gas inlet adapter and then evacuated and filled with nitrogen. Anhydrous  $\text{CH}_2\text{Cl}_2$  (50 mL) was added to the flask via syringe. The flask was cooled by an ice bath ( $0^\circ\text{C}$ ), and triethylamine (763 mg, 7.54 mmol) was added. After stirring under nitrogen at  $20^\circ\text{C}$  for 1 h, the reaction was diluted with  $\text{CH}_2\text{Cl}_2$  (50 mL), then the organic phase was washed with water (50 mL x2) and brine (50 mL), dried over sodium sulfate, filtered and concentrated by rotary evaporation. An off-white solid (1.20 g, 2.37 mmol, 63%) was obtained after column chromatography (petroleum ether:EA 100:0 to 55:45).  $^1\text{H}$  NMR (400 MHz,  $\text{CDCl}_3$ )  $\delta$  8.19 (app d,  $J = 8.6$  Hz, 2H), 7.92 (app d,  $J = 8.5$  Hz, 2H), 5.73 (hept,  $J = 6.2$  Hz, 1H), 4.55 (t,  $J = 6.6$  Hz, 1H), 4.31 – 4.04 (m, 2H), 3.97 (s, 3H), 2.99 – 2.72 (m, 4H), 1.83 – 1.67 (m, 3H), 1.20 – 1.03 (m, 2H).  $^{13}\text{C}$  NMR (101 MHz, DMSO)  $\delta$  165.65, 151.02, 145.18, 133.25, 130.48, 127.30, 121.34 (q,  $J_{\text{C-F}} = 282.0$  Hz), 67.68 (hept,  $J_{\text{C-F}} = 33.0$  Hz), 52.97, 47.91, 44.19, 43.70, 35.76, 29.47, 29.10. HRMS  $[\text{M}+\text{H}]^+$   $m/z$  calcd. for  $[\text{C}_{18}\text{H}_{20}\text{O}_6\text{N}_2\text{F}_6\text{SNa}]^+$  529.0844, found 529.0844

### 4-(N-((1-(((1,1,1,3,3,3-hexafluoropropan-2-yl)oxy)carbonyl)piperidin-4-yl)methyl)sulfamoyl)benzoic acid

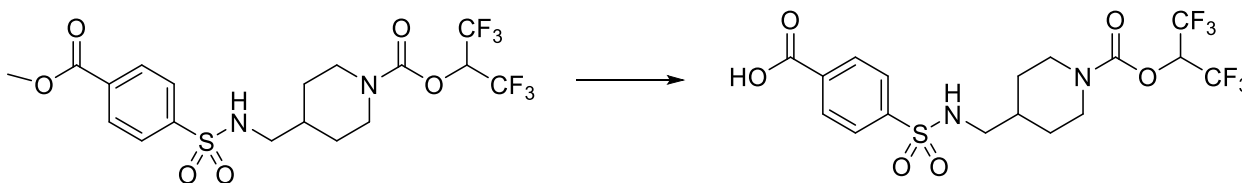

A round bottom flask was charged with 1,1,1,3,3,3-hexafluoropropan-2-yl 4-(((4-(methoxycarbonyl)phenyl)sulfonamido)methyl)piperidine-1-carboxylate (880 mg, 1.74 mmol),  $\text{LiOH}\cdot\text{H}_2\text{O}$  (182 mg, 4.34 mmol) in THF (20 mL) and  $\text{H}_2\text{O}$  (20 mL). After string at  $20^\circ\text{C}$  for 2 h, the mixture was acidized by 2 N HCl to pH 3–4 and extracted by EA (50 mL x 2). The organic phase was washed with water (30 mL) and brine (30 mL x2), dried over  $\text{Na}_2\text{SO}_4$ , filtered and concentrated by rotary evaporation. An off-white solid (735 mg, 1.53 mmol, 86%) was obtained after triturating from  $\text{CH}_2\text{Cl}_2$ /Hexane (3 mL/15 mL).  $^1\text{H}$  NMR (400 MHz, DMSO)  $\delta$  13.40 (s, 1H), 8.12 (app d,  $J = 8.5$  Hz, 2H), 8.05 – 7.60 (m, 3H), 6.52 (hept,  $J = 6.4$  Hz, 1H), 3.91 (t,  $J = 14.2$  Hz, 2H), 3.05 – 2.74 (m, 2H), 2.67 (t,  $J = 6.3$  Hz, 2H), 1.80 – 1.37 (m, 3H), 1.37 – 0.68 (m, 2H).  $^{13}\text{C}$  NMR (101 MHz, DMSO)  $\delta$  166.24, 150.56, 144.30, 134.07, 130.14, 126.71, 120.90 (q,  $J_{\text{C-F}} = 281.0$  Hz), 67.20 (hept,  $J_{\text{C-F}} = 33.2$  Hz), 47.45, 44.21, 43.76, 35.31, 29.03, 28.65. LCMS  $[\text{M}+\text{H}]^+$   $m/z$  calcd. for  $[\text{C}_{17}\text{H}_{16}\text{O}_6\text{N}_2\text{F}_6\text{SNa}]^+$  515.0687, found 515.0685

### 1,1,1,3,3,3-hexafluoropropan-2-yl 4-(((3-methyloxetan-3-yl)methoxy)carbonyl) phenylsulfonamido) methyl)piperidine-1-carboxylate (8)

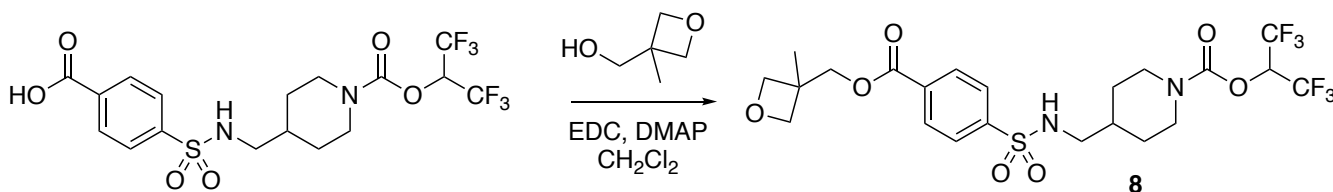

A dry round-bottom flask was charged with 3-methyl-3-oxetanemethanol (57.0 mg, 0.559 mmol), 1-(3-dimethylaminopropyl)-3-ethylcarbodiimide hydrochloride (117 mg, 0.609 mmol) and DMAP (6.20 mg, 0.0508 mmol). The flask was outfitted with a septum-fitted gas inlet adapter and then evacuated and filled with nitrogen. Anhydrous  $\text{CH}_2\text{Cl}_2$  (5 mL, 0.1 M) was added to the flask via syringe. The flask was cooled by an ice bath ( $0^\circ\text{C}$ ), and 4-(N-((1-(((1,1,1,3,3,3-hexafluoropropan-2-yl)oxy)carbonyl)piperidin-4-yl)methyl)sulfamoyl)benzoic acid (250 mg, 0.508 mmol) was added. After stirring under nitrogen at  $0^\circ\text{C}$  for 15 min and at r.t overnight, the reaction mixture was diluted with  $\text{CH}_2\text{Cl}_2$ . The solution was washed with saturated sodium bicarbonate solution, water

and brine, and the organics were dried over sodium sulfate and concentrated by rotary evaporation. A white solid (280 mg, 0.486 mmol, 96%) was obtained after column chromatography (CH<sub>2</sub>Cl<sub>2</sub>:EA 100:0 to 95:5). <sup>1</sup>H NMR (400 MHz, CDCl<sub>3</sub>) δ 8.21 (app d, *J* = 8.4 Hz, 2H), 7.94 (app d, *J* = 8.4 Hz, 2H), 5.73 (hept, *J* = 6.3 Hz, 1H), 4.64 - 4.61 (m, 3H), 4.49 (d, *J* = 6.0 Hz, 2H), 4.44 (s, 2H), 4.27 - 4.06 (m, 2H), 2.99 - 2.76 (m, 4H), 1.89 - 1.65 (m, 3H), 1.44 (s, 3H), 1.23 - 1.05 (m, 2H). <sup>13</sup>C NMR (101 MHz, CDCl<sub>3</sub>) δ 176.52 (C), 161.22 (C), 151.45 (C), 143.20 (C), 135.91 (C), 128.27 (CH), 127.91 (CH), 120.80 (q, *J*<sub>C-F</sub> = 281.6 Hz, C), 68.16 (hept, *J*<sub>C-F</sub> = 34.2 Hz, CH), 48.51 (CH<sub>2</sub>), 44.79 (CH<sub>2</sub>), 44.19 (CH<sub>2</sub>), 36.47 (CH), 29.56 (CH<sub>2</sub>), 29.20 (CH<sub>2</sub>), 13.68 (CH<sub>3</sub>). HRMS [M+H]<sup>+</sup> *m/z* calcd. for [C<sub>22</sub>H<sub>27</sub>O<sub>7</sub>N<sub>2</sub>F<sub>6</sub>S]<sup>+</sup> 577.1443, found 577.1421

**1,1,1,3,3,3-hexafluoropropan-2-yl 4-((4-(6-(methylthio)-1,2,4,5-tetrazin-3-yl)phenyl)sulfonamido)methyl)piperidine-1-carboxylate (9)**

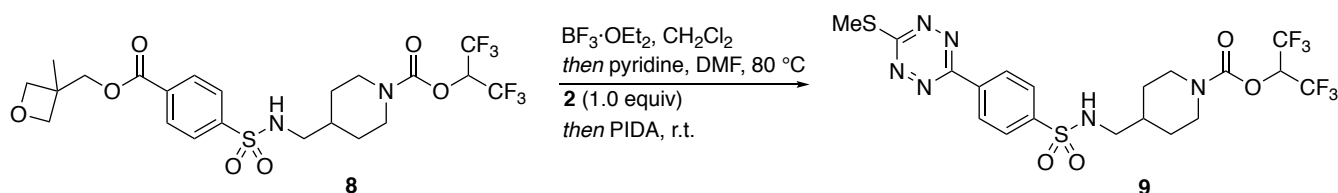

A dry round-bottom flask was charged with **8** (93 mg, 0.16 mmol) and a magnetic stirbar. The flask was outfitted with a septum-fitted gas inlet adapter, evacuated and refilled with nitrogen. Anhydrous CH<sub>2</sub>Cl<sub>2</sub> (0.16 mL) was added via syringe and the resulting solution was cooled by an ice/brine bath (−5 °C) and BF<sub>3</sub>·OEt<sub>2</sub> (10 μL, 0.081 mmol) was added via syringe. The resulting mixture was allowed to stir under nitrogen with continued cooling by the cold bath (maintained between −5 °C to −0 °C) for 4 h. Reaction mixture was quenched with pyridine (39 μL, 0.48 mmol), and then **2** (28 mg, 0.11 mmol) and DMF (0.11 mL) were added. The mixture was stirred vigorously and vacuum was carefully applied to remove CH<sub>2</sub>Cl<sub>2</sub>. The resulting mixture was then heated by an oil bath at 80 °C and the mixture was allowed to stir under nitrogen at 80 °C for 2 h. After cooling to r.t., PIDA (36 mg, 0.11 mmol) was added to the flask and the mixture allowed to stir at r.t. for 1 h. The mixture was diluted with CH<sub>2</sub>Cl<sub>2</sub> and sequentially washed with saturated sodium bicarbonate, water and brine, dried over sodium sulfate and concentrated by rotary evaporation. A red solid (47 mg, 0.082 mmol, 72%) was obtained after purified by chromatography (CH<sub>2</sub>Cl<sub>2</sub>:Et<sub>2</sub>O 100:0 to 95:5). <sup>1</sup>H NMR (600 MHz, CDCl<sub>3</sub>) δ 8.69 (app d, *J* = 8.5 Hz, 2H), 8.05 (app d, *J* = 8.5 Hz, 2H), 5.72 (hept, *J* = 6.3 Hz, 1H), 4.80 (t, *J* = 6.6 Hz, 1H), 4.19 - 4.13 (m, 2H), 2.93 (t, *J* = 6.5 Hz, 2H), 2.92 - 2.82 (m, 2H), 2.82 (s, 3H), 1.81 - 1.71 (m, 3H), 1.22 - 1.10 (m, 2H). <sup>13</sup>C NMR (101 MHz, CDCl<sub>3</sub>) δ 176.52 (C), 161.22 (C), 151.45 (C), 143.20 (C), 135.91 (C), 128.27 (CH), 127.91 (CH), 120.80 (q, *J*<sub>C-F</sub> = 281.6 Hz, C), 68.16 (hept, *J*<sub>C-F</sub> = 34.2 Hz, CH), 48.51 (CH<sub>2</sub>), 44.79 (CH<sub>2</sub>), 44.19 (CH<sub>2</sub>), 36.47 (CH), 29.56 (CH<sub>2</sub>), 29.20 (CH<sub>2</sub>), 13.68 (CH<sub>3</sub>). IR (KBr), ν/cm<sup>−1</sup> 3060, 2932, 2834, 1734, 1653, 1527, 1267, 1183, 740. HRMS [M+H]<sup>+</sup> *m/z* calcd. for [C<sub>19</sub>H<sub>21</sub>O<sub>4</sub>N<sub>6</sub>F<sub>6</sub>S<sub>2</sub>]<sup>+</sup> 575.0970, found 575.0956

**1,1,1,3,3,3-hexafluoropropan-2-yl 4-((4-(6-(furan-3-yl)-1,2,4,5-tetrazin-3-yl)phenyl)sulfonamido) methyl)piperidine-1-carboxylate (10a)**

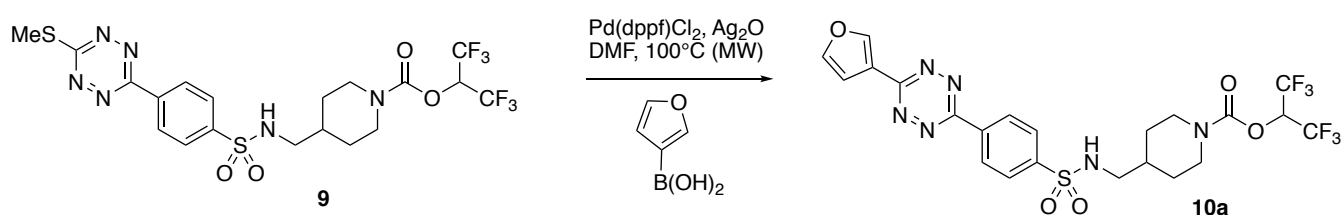

To a microwave reaction tube was sequentially charged with **9** (28 mg, 0.049 mmol), Pd(dppf)Cl<sub>2</sub> (11 mg, 0.015 mmol), 3-furanboronic acid (33 mg, 0.29 mmol), Ag<sub>2</sub>O (57 mg, 0.24 mmol) and DMF (1.0 ml) in glove box. After heating under nitrogen at 100 °C for 3 h, the DMF was removed by rotary evaporation under high vacuum. A pink solid (21 mg, 0.036 mmol, 74%) was obtained after reverse phase chromatography with two stacked 14 g YAMAZEN C18 columns (H<sub>2</sub>O:MeOH 10:0 to 0:10). <sup>1</sup>H NMR (400 MHz, CDCl<sub>3</sub>) δ 8.78 (d, *J* = 8.4 Hz, 2H), 8.60 (s, 1H), 8.08 (d, *J* = 8.3 Hz, 2H), 7.67 (t, *J* = 1.7 Hz, 1H), 7.29 (d, *J* = 1.7 Hz, 1H), 5.73 (hept, *J* = 6.1 Hz, 1H), 4.61 (t, *J* = 6.6 Hz, 1H), 4.18 (t, *J* = 14.3 Hz, 1H), 2.95 (t, *J* = 6.6 Hz, 1H), 2.91 - 2.73 (m, 1H), 1.92 - 1.68 (m, 2H), 1.16 (t, *J* = 13.2 Hz, 1H). <sup>13</sup>C NMR (101 MHz, CDCl<sub>3</sub>) δ 162.70 (C), 162.10 (C), 151.46 (C), 146.70 (CH), 145.36 (CH), 143.45 (C), 136.07 (C), 128.60 (CH), 127.95 (CH), 122.81 (q, *J*<sub>C-F</sub> = 279.9 Hz, C), 121.02 (C), 108.77 (CH), 68.16 (hept, *J*<sub>C-F</sub> = 34.2 Hz, CH), 48.54 (CH<sub>2</sub>), 44.80 (CH<sub>2</sub>), 44.20 (CH<sub>2</sub>), 36.50 (CH), 29.57 (CH<sub>2</sub>), 29.21 (CH<sub>2</sub>). HRMS [M+H]<sup>+</sup> *m/z* calcd. for [C<sub>22</sub>H<sub>21</sub>O<sub>5</sub>N<sub>6</sub>F<sub>6</sub>S]<sup>+</sup> 595.1198, found 595.1180

**1,1,1,3,3,3-hexafluoropropan-2-yl 4-((4-(6-(1-ethoxyvinyl)-1,2,4,5-tetrazin-3-yl)phenylsulfonamido) methyl)piperidine-1-carboxylate (10b)**

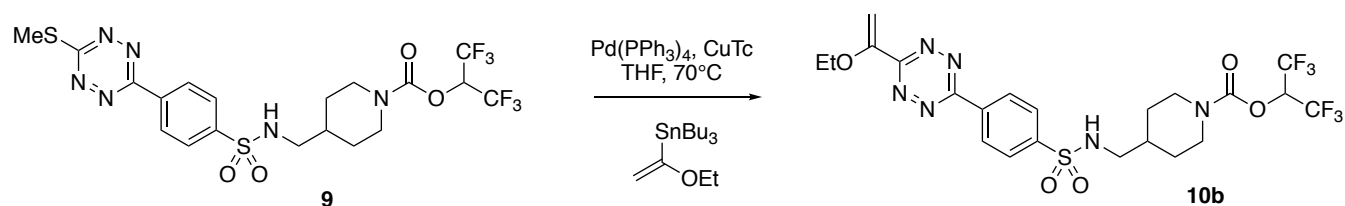

To a dry round-bottom flask was added **9** (15 mg, 0.026 mmol), Pd(PPh<sub>3</sub>)<sub>4</sub> (4.5 mg, 0.039 mmol), CuTc (10 mg, 0.052 mmol). The flask was outfitted with a septum-fitted gas inlet adapter, and was twice evacuated and backfilled with nitrogen. Tributyl(1-ethoxyvinyl)tin (0.017 mL, 0.052 mmol) and anhydrous dioxane (5.2 mL) were added via syringe, and the flask was heated by an oil bath at 100 °C for 30 min. After cooling down, the reaction mixture was diluted with hexane and filtered through short pad of 10% K<sub>2</sub>CO<sub>3</sub> modified silica gel. Et<sub>2</sub>O was used to washed off all red fractions. A pink oil (11 mg, 0.018 mmol, 67%) was obtained after column chromatography with 10% K<sub>2</sub>CO<sub>3</sub> modified silica gel (CH<sub>2</sub>Cl<sub>2</sub>:Et<sub>2</sub>O 100:0 to 85:15). <sup>1</sup>H NMR (400 MHz, CDCl<sub>3</sub>) δ 8.79 (app d, *J* = 8.5 Hz, 2H), 8.07 (app d, *J* = 8.5 Hz, 2H), 6.09 (d, *J* = 3.0 Hz, 1H), 5.72 (hept, *J* = 6.3 Hz, 1H), 5.01 (d, *J* = 3.0 Hz, 1H), 4.65 (t, *J* = 6.6 Hz, 1H), 4.21 - 4.14 (m, 4H), 2.94 (app t, *J* = 6.5 Hz, 2H), 2.90 - 2.80 (m, 2H), 1.90 - 1.70 (m, 3H), 1.56 (t, *J* = 7.0 Hz, 3H), 1.20 - 1.13 (m, 2H). <sup>13</sup>C NMR (101 MHz, CDCl<sub>3</sub>) δ 163.05 (C), 162.04 (C), 153.42 (C), 151.46 (C), 143.72 (C), 135.77 (C), 128.95 (CH), 127.94 (CH), 120.81 (q, *J*<sub>C-F</sub> = 281.0 Hz, C), 94.37 (C), 68.16 (hept, *J*<sub>C-F</sub> = 34.2 Hz, C), 64.84 (CH<sub>2</sub>), 48.55 (C), 44.79 (CH<sub>2</sub>), 44.19 (CH<sub>2</sub>), 36.50 (CH), 29.56 (CH<sub>2</sub>), 29.21 (CH<sub>2</sub>), 14.49 (CH<sub>3</sub>). HRMS [M+H]<sup>+</sup> *m/z* calcd. for [C<sub>22</sub>H<sub>25</sub>O<sub>5</sub>N<sub>6</sub>F<sub>6</sub>S]<sup>+</sup> 599.1511, found 599.1496

**1,1,1,3,3,3-hexafluoropropan-2-yl 4-((4-(1,2,4,5-tetrazin-3-yl)phenylsulfonamido)methyl)piperidine-1-carboxylate (10c)**

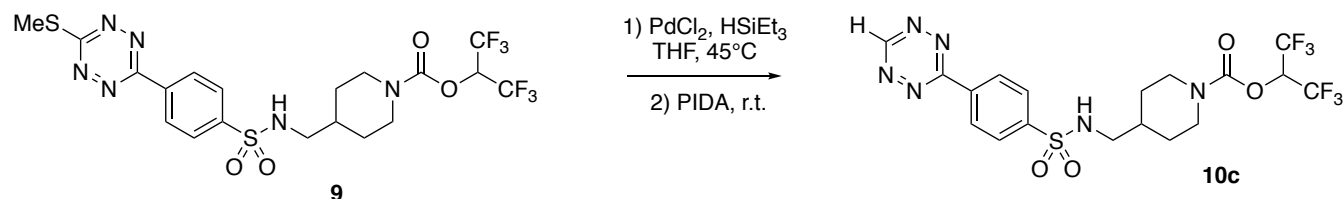

To a dry round-bottom flask was added **9** (20 mg, 0.035 mmol), PdCl<sub>2</sub> (0.62 mg, 0.0035 mmol). The flask was outfitted with a septum-fitted gas inlet adapter, and was twice evacuated and backfilled with nitrogen. Triethylsilane (17 μL, 0.10 mmol) and anhydrous THF (0.35 mL) were added via syringe, and the flask was heated by an oil bath at 45 °C. The mixture was allowed to stir at 45 °C for 24 h. PIDA (12 mg, 0.042 mmol) was added as a solid at r.t. After stirring at room temperature for 1 h, the reaction mixture was diluted with CH<sub>2</sub>Cl<sub>2</sub>, transferred to a separatory funnel and was sequentially washed with saturated sodium bicarbonate, water, brine, dried over sodium sulfate and concentrated by rotary evaporation. A pink solid (10 mg, 0.019 mmol, 54%) was obtained after column chromatography (CH<sub>2</sub>Cl<sub>2</sub>:Et<sub>2</sub>O 100:0 to 95:5). <sup>1</sup>H NMR (400 MHz, CDCl<sub>3</sub>) δ 10.32 (s, 1H), 8.81 (app d, *J* = 8.6 Hz, 2H), 8.10 (app d, *J* = 8.6 Hz, 2H), 5.73 (hept, *J* = 5.9 Hz, 1H), 4.65 (t, *J* = 6.6 Hz, 1H), 4.19 (app d, *J* = 13.6 Hz, 1H), 4.15 (app d, *J* = 13.6 Hz, 1H), 2.95 (app t, *J* = 6.6 Hz, 2H), 2.90 (app td, *J* = 13.0, 2.1 Hz, 1H), 2.84 (app td, *J* = 13.0, 2.1 Hz, 1H), 1.18 - 1.69 (m, 3H), 1.20 - 1.12 (m, 2H). <sup>13</sup>C NMR (101 MHz, CDCl<sub>3</sub>) δ 165.53, 158.32, 151.45, 144.14, 135.72, 129.20, 127.99, 120.80 (q, *J*<sub>C-F</sub> = 281.0 Hz), 69.16 (hept, *J*<sub>C-F</sub> = 34.2 Hz), 48.54, 44.78, 44.19, 36.50, 29.55, 29.20. HRMS [M+H]<sup>+</sup> *m/z* calcd. for [C<sub>18</sub>H<sub>19</sub>O<sub>4</sub>N<sub>6</sub>F<sub>6</sub>S]<sup>+</sup> 529.1093, found 529.0932

**Stopped-flow kinetic analysis of MAGL tetrazines **10a**, **10b**, **10c** and **12**<sup>[3]</sup> with *eq*-5-hydroxy-*trans*-cyclooctene in MeOH at 25°C**

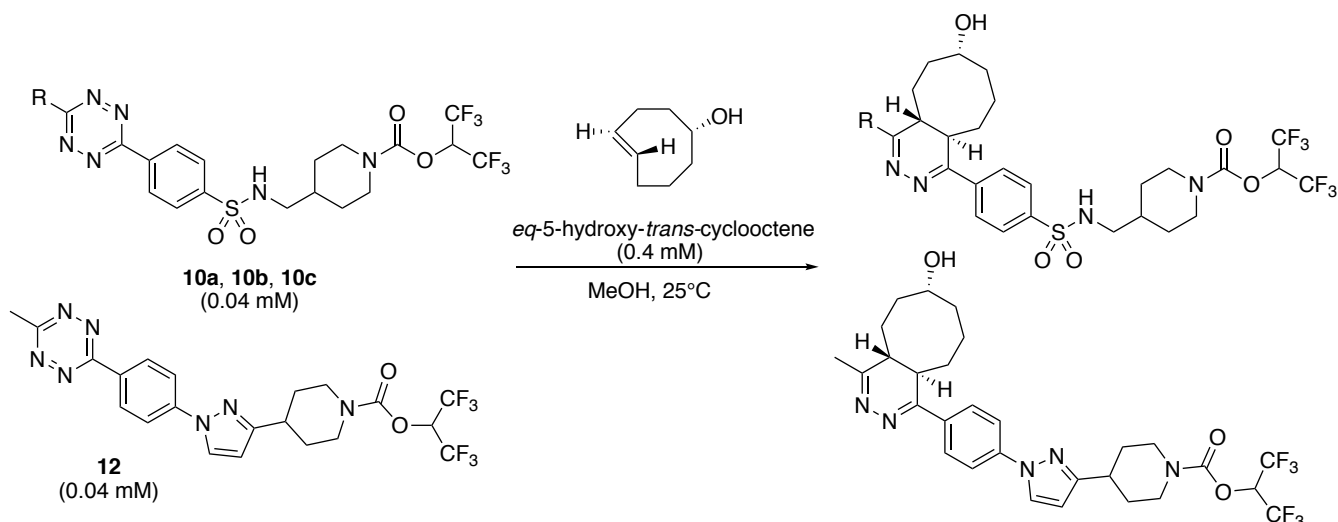

Solutions (3 mL) of tetrazines **10a**, **10b**, **10c** and **12** (0.080 mM) was prepared in MeOH. Solutions (3 mL) of *eq*-5-hydroxy-*trans*-cyclooctene (0.80 mM) were prepared in MeOH. The reactions between tetrazines and *trans*-cyclooctene were measured under pseudo-first order conditions using SX 18MV-R stopped-flow spectrophotometer (Applied Photophysics Ltd.). Each solution of tetrazine and *trans*-cyclooctene were injected in equal volumes via 3 mL syringes into the stopped-flow instrument at 25 °C, resulting in final concentration of 0.04 mM of tetrazines and 0.40 mM *trans*-cyclooctene. The reaction was monitored by the decay of absorbance associated with the tetrazines (**10a** and **10b** at 300 nm, **10c** at 280 nm). Reaction were repeated in triplicate. With Prism software, an observed rate constant,  $k_{\text{obs}}$ , was obtained by nonlinear regression.

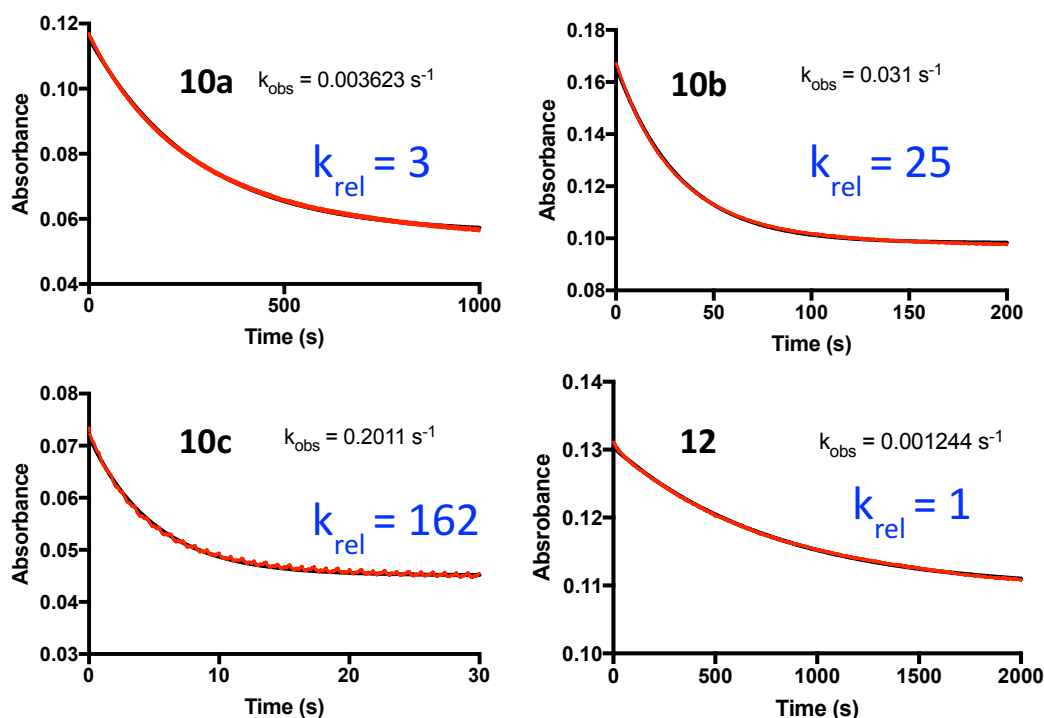

**Figure S4** Pseudo-first order stopped-flow kinetics of tetrazine **10a**, **10b**, **10c** and *eq*-5-hydroxy-*trans*-cyclooctene. The plot shows the decay of absorbance at 300 nm, 300 nm, 280 nm respectively measured by a stopped-flow instrument (red curve). The nonlinear regression calculation by prism software is fitted as black curve.

## MAGL Probe Experiment

**Materials.** Tetrazine amine was purchased from Click Chemistry Tools. TCO-TAMRA were synthesized according to literature protocol.<sup>[4]</sup> Human brain vascular pericytes and pericyte growth supplement were purchased from ScienCell Research Laboratories. Phosphate-based saline (PBS) was purchased from Mediatech, Inc.. Media and other supplements for cell culture were purchased from Thermo Fisher Scientific unless otherwise noted. For cell experiments, all reagents were prepared as 1000x stock solutions in DMSO and stored at -80 °C.

**MAGL in vitro activity assay.** The MAGL in vitro activity assay was performed based on a reported protocol.<sup>[5]</sup> Briefly, human MAGL enzyme was pre-treated with compounds at room temperature for 30 min, and subsequently incubated with 7-hydroxycoumarinyl arachidonate (7-HCA) as a substrate at room temperature for 1 h. The fluorescence signals were measured on an Envision plate reader (excitation 355 nm, emission 460 nm).

**Cell culture and probe treatment.** Human brain vascular pericytes were cultured in Dulbecco's Modified Eagle Medium/Nutrient Mixture F-12 (DMEM/F-12) GlutaMAX media supplemented with 5% heat-inactivated fetal bovine serum (HI FBS), 1x pericyte growth supplement (PGS), and 1x penicillin-streptomycin at 37 °C with 5% CO<sub>2</sub> in a humidified environment. Cells were plated in 6-well plates and cultured overnight in growth media.

To assess cellular potency of probe **10c**, live cells were treated with **10c** (0.32 nM – 10 μM) at 37 °C for 1 h, after which the cells were washed with fresh media. The media were then placed with fresh media containing 2 μM of TCO-TAMRA, and the cells were incubated at 37 °C for 30 min. The reaction was quenched by replacing the media with PBS containing 100 μM tetrazine amine, and the cells were washed with cold PBS and harvested with a scraper.

To measure the cellular labeling kinetics of TCO-TAMRA with **10c** and **12**, live cells were treated with **10c** (1 μM) or **12** (32 nM) at 37 °C for 1 h. At these concentrations, both probes achieved full labeling of MAGL. Subsequently, the cells were washed with fresh growth media, which were placed with fresh media containing 50 nM, 200 nM, or 2 μM of TCO-TAMRA, and the cells were incubated at 37 °C for 2, 5, 10, 15, 20, 30, and 60 min. To quench the reaction, the media were replaced with PBS containing 100 μM tetrazine amine, and the cells were washed with cold PBS and harvested with a scraper.

The suspensions were centrifuged at 10,000xg for 1 min at 37 °C, and the cell pellets were lysed in PBS containing 0.25% sodium dodecyl sulfate (SDS) with sonication. The protein concentration was measured with a bicinchoninic acid (BCA) assay kit (Thermo Scientific) and normalized.

**In-gel fluorescence and data analysis.** The proteomes were analyzed with 1.0 mm thick 4-12% bis-tris protein gels in 2-(*N*-morpholino)ethanesulfonic acid (MES) buffer. The gels were scanned with a Typhoon FLA 9500 Biomolecular Imager (GE Healthcare) with the TAMRA channel with 532 nm excitation and a 575 nm long pass emission filter. To measure the total protein loading, the gels were treated with ClearPage Instant Blue (CBS Scientific) overnight, and after brief destaining with water, scanned with an Odyssey Imager (Li-COR) at the 700 nm channel. The in-gel fluorescence images were processed with ImageJ software (v1.47, NIH), and the intensities were quantified with Image Studio (v5.2, Li-COR) with background subtraction. The coomassie images were processed and quantified with the Image Studio software. For data fitting, the fluorescence intensities of the two MAGL bands were averaged and fitted with a dose-response (for cellular potency) or exponential (for kinetics) equation with Prism v7.02 (GraphPad).

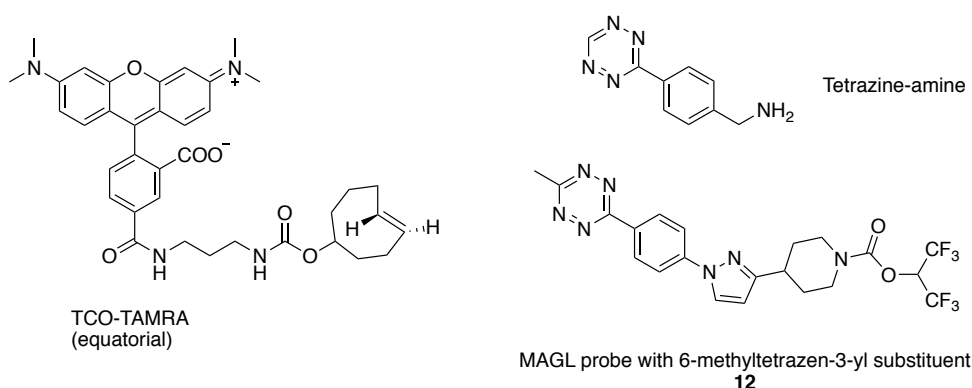

**Figure S5** Structure of reagents in live cell experiments

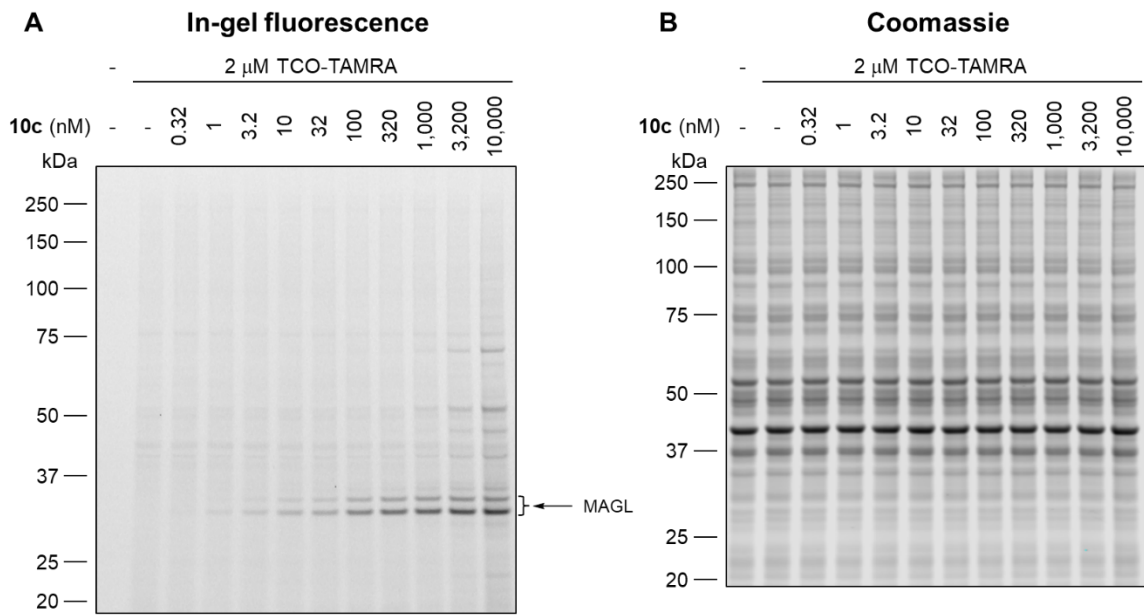

**Figure S6** Representative cellular potency data of **10c** in live human brain vascular pericytes. (A) Full gel of in-gel fluorescence data in Figure 3C. (B) Coomassie staining of total proteins.

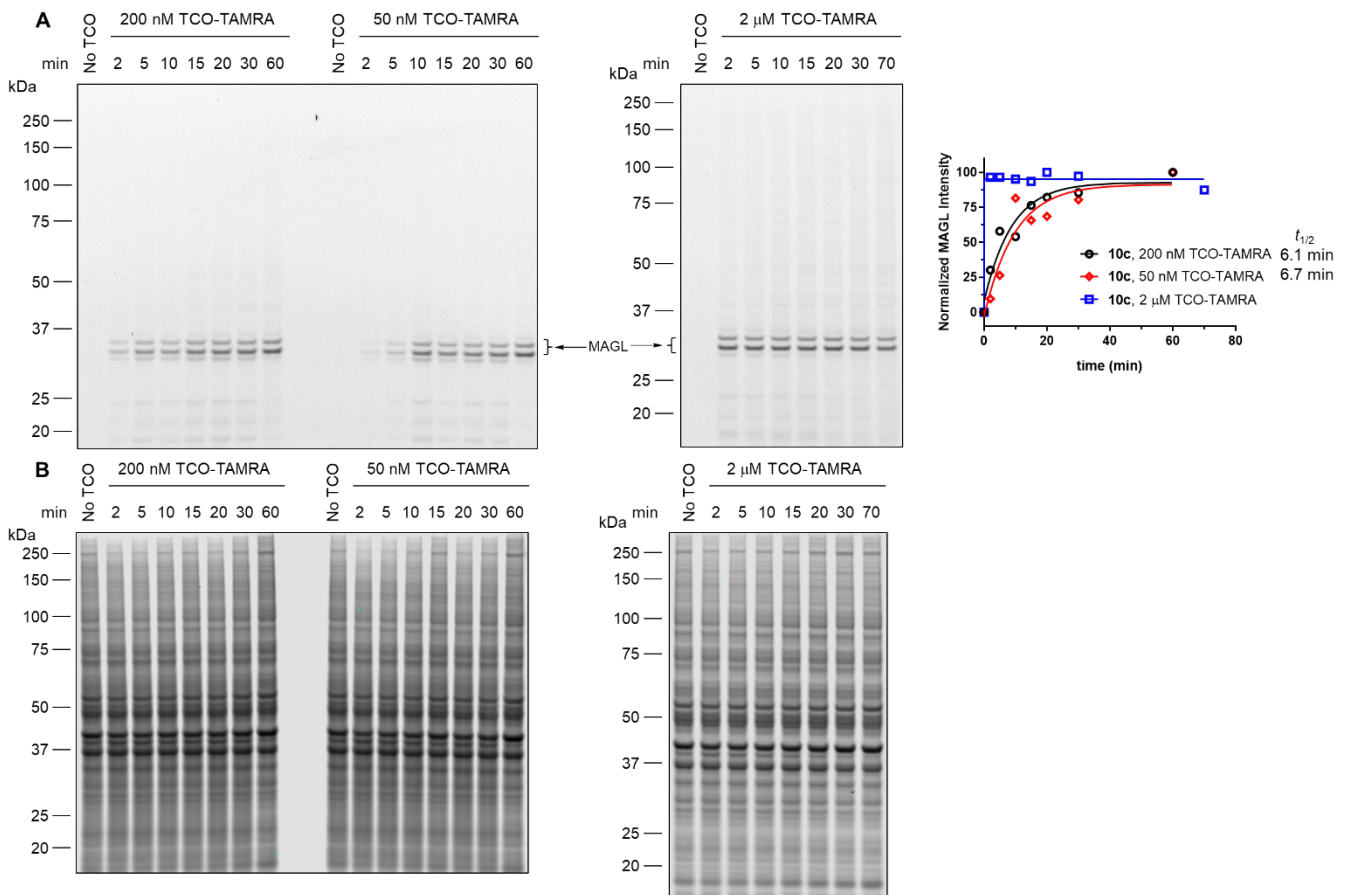

**Figure S7** Cellular labeling kinetics of TCO-TAMRA with **10c** (1  $\mu$ M, 1 h) in live human brain vascular pericytes. (A) Full gel of in-gel fluorescence data (200 nM TCO-TAMRA in Figure 3D). (B) Coomassie staining of total proteins.

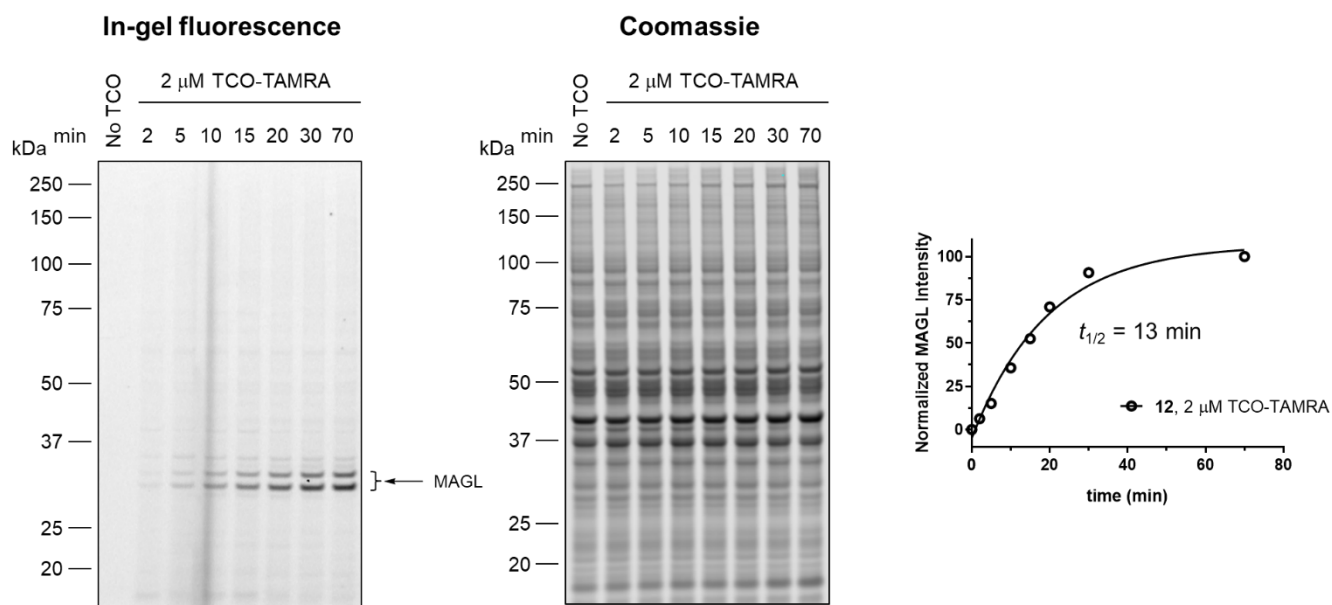

**Figure S8** Cellular labeling kinetics of TCO-TAMRA with **12** (32 nM, 1 h) in live human brain vascular pericytes.

## References

- [1] *Org. Process Res. Dev.* **2018**, *22*, 1262–1275.
- [2] E. S. Scott, L. F. Audrieth, *J. Org. Chem.* **1954**, *19*, 1231-1237.
- [3] W. D. Lambert, Y. Fang, S. Mahapatra, Z. Huang, C. W. am Ende, J. M. Fox, *J. Am. Chem. Soc.* **2019**, *141*, 17068-17074.
- [4] H. E. Murrey, J. C. Judkins, C. W. am Ende, T. E. Ballard, Y. Fang, K. Riccardi, L. Di, E. R. Guilmette, J. W. Schwartz, J. M. Fox, D. S. Johnson, *J. Am. Chem. Soc.* **2015**, *137*, 11461-11475.
- [5] C. R. Butler, E. M. Beck, A. Harris, Z. Huang, L. A. McAllister, C. W. am Ende, K. Fennell, T. L. Foley, K. Fonseca, S. J. Hawrylik, D. S. Johnson, J. D. Knafels, S. Mente, G. S. Noell, J. Pandit, T. B. Phillips, J. R. Piro, B. N. Rogers, T. A. Samad, J. Wang, S. Wan, M. A. Brodney, *J. Med. Chem.* **2017**, *60*, 9860-9873.



7.3830  
7.3791  
7.3758  
7.3682  
7.3659  
7.3586  
7.3548  
7.3528  
7.3462  
7.3399  
7.3358  
7.3328  
7.3296  
7.3255  
7.3181  
7.3142  
7.3090  
7.3038  
7.2985  
7.2961  
7.2919  
7.2882

4.6446  
4.5090  
4.4939  
4.3856  
4.3705  
4.2567  
4.1480

1.3239

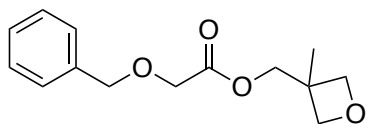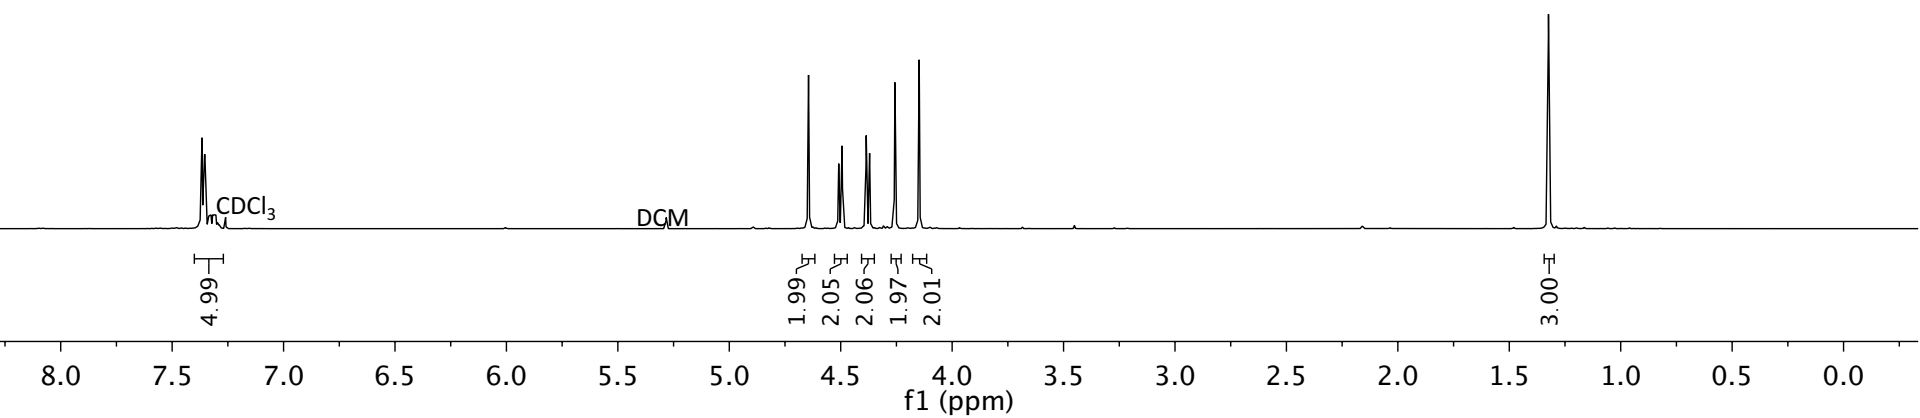

—170.5579

—137.0144

128.5953

128.1531

128.1159

79.4982

73.4478

68.9897

67.0140

—39.1159

—21.1834

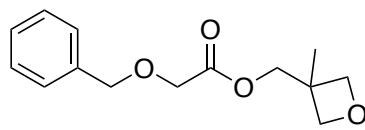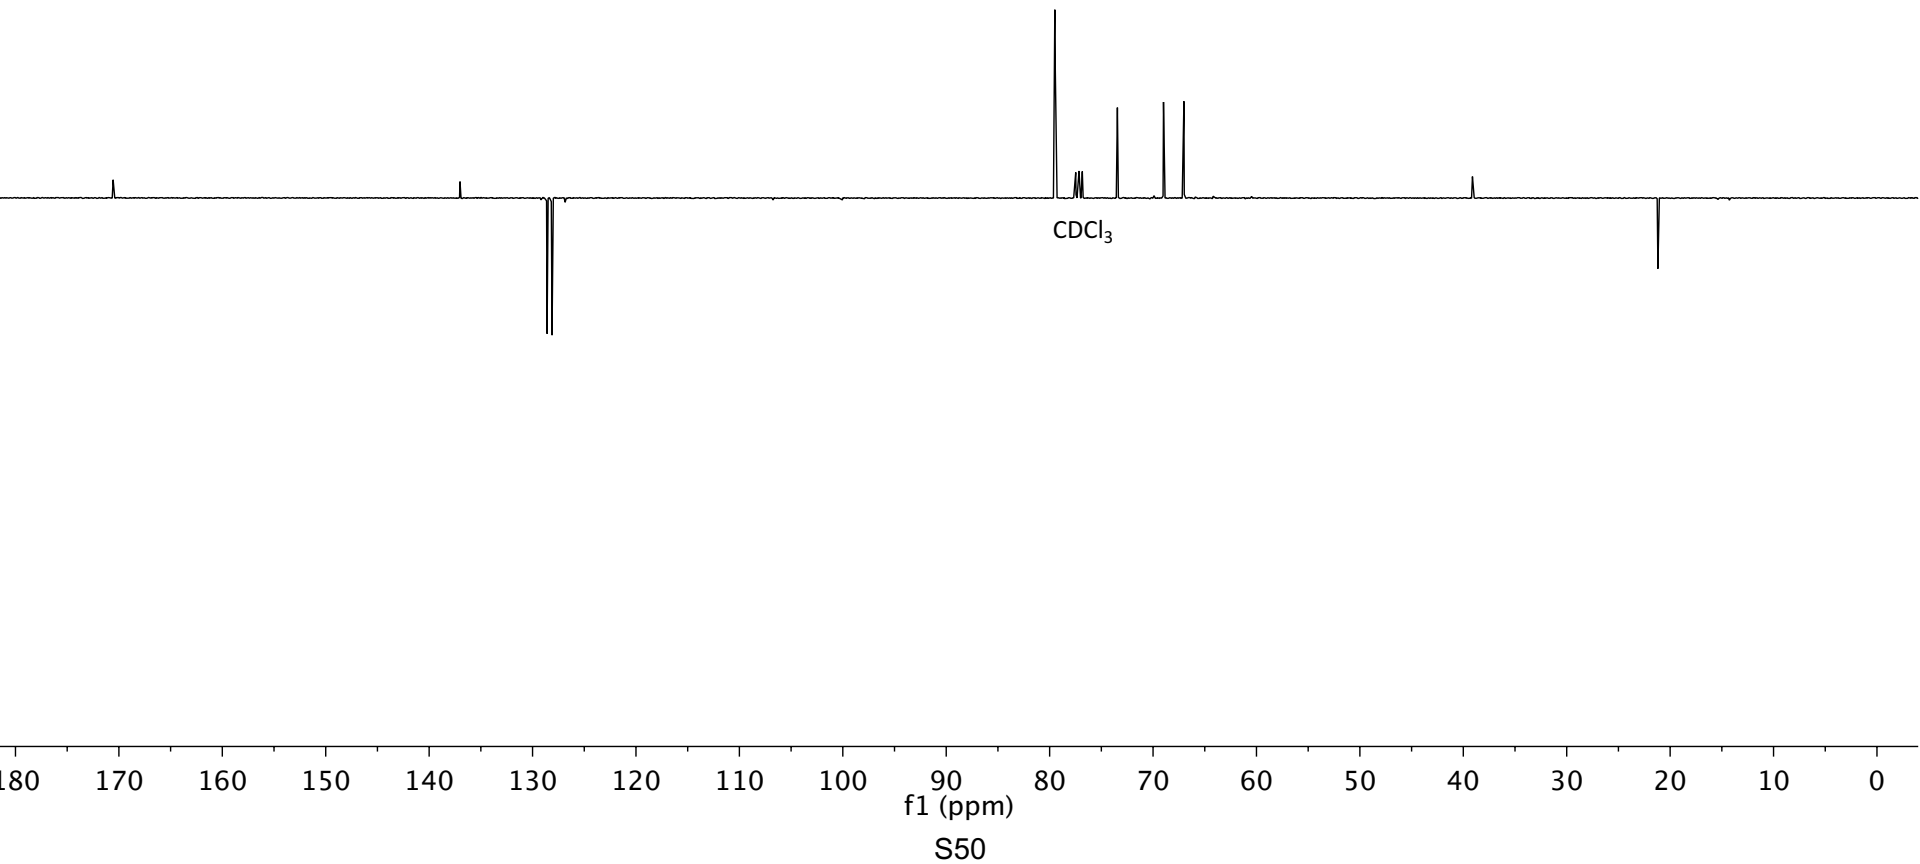

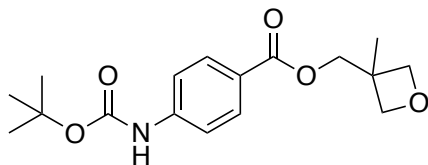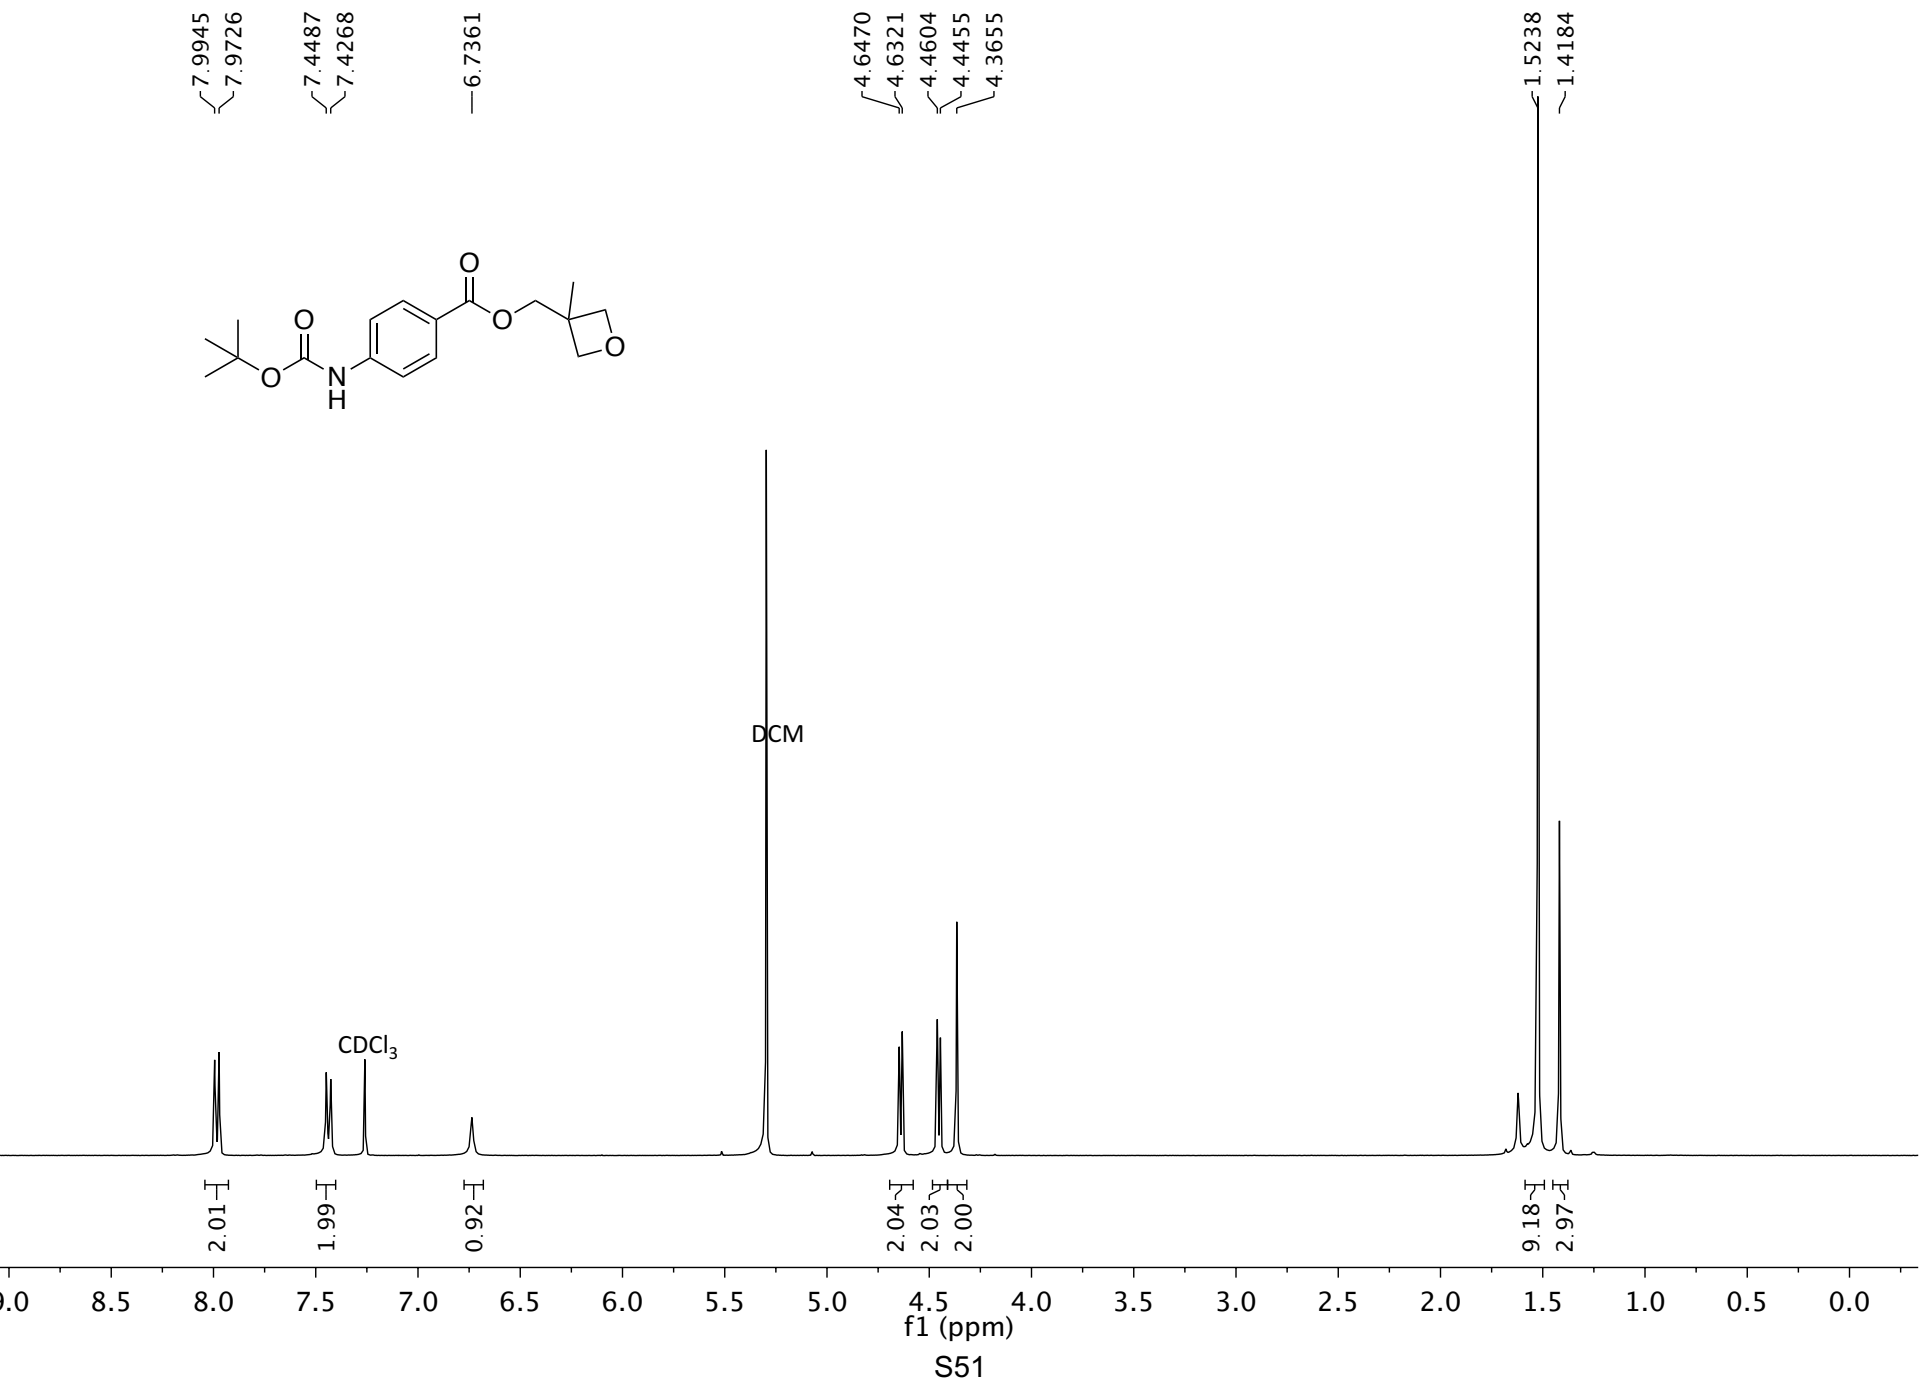

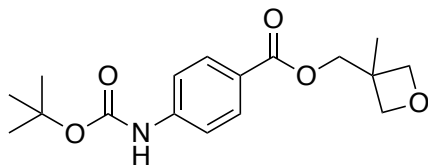

—166.2946  
—152.2606  
—143.0939  
—131.0935  
—124.1229  
—117.5178  
81.4169  
79.8044  
—68.9459  
—39.4461  
—28.4080  
—21.4639

CDCl<sub>3</sub>

170 160 150 140 130 120 110 100 90 80 70 60 50 40 30 20 10 0

f1 (ppm)

S52

8.0264  
8.0056

7.3679  
7.3477

4.9492  
4.6446  
4.6296  
4.4640  
4.4491  
4.3838  
4.3701

1.4608  
1.4217

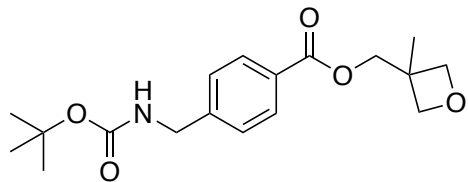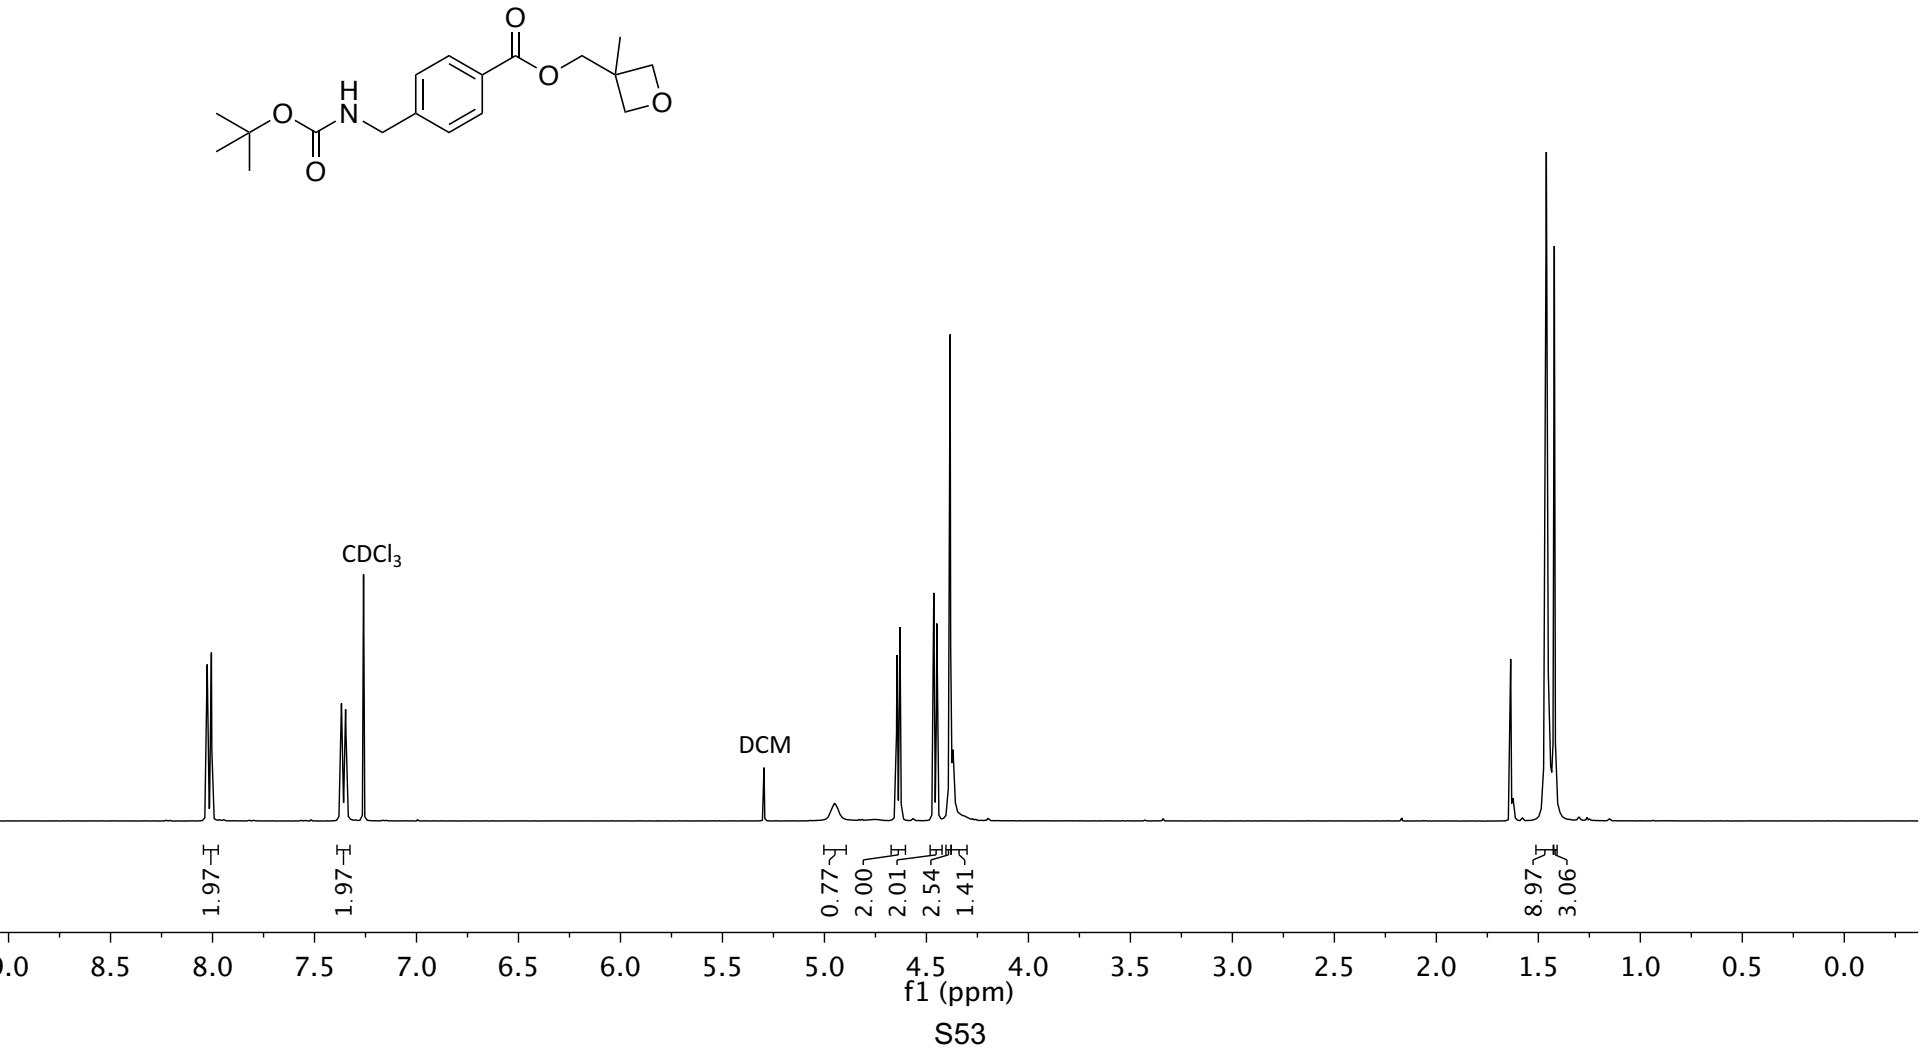

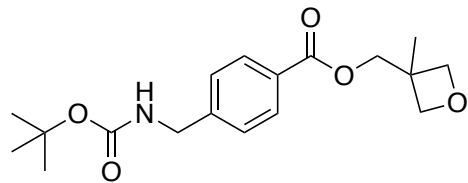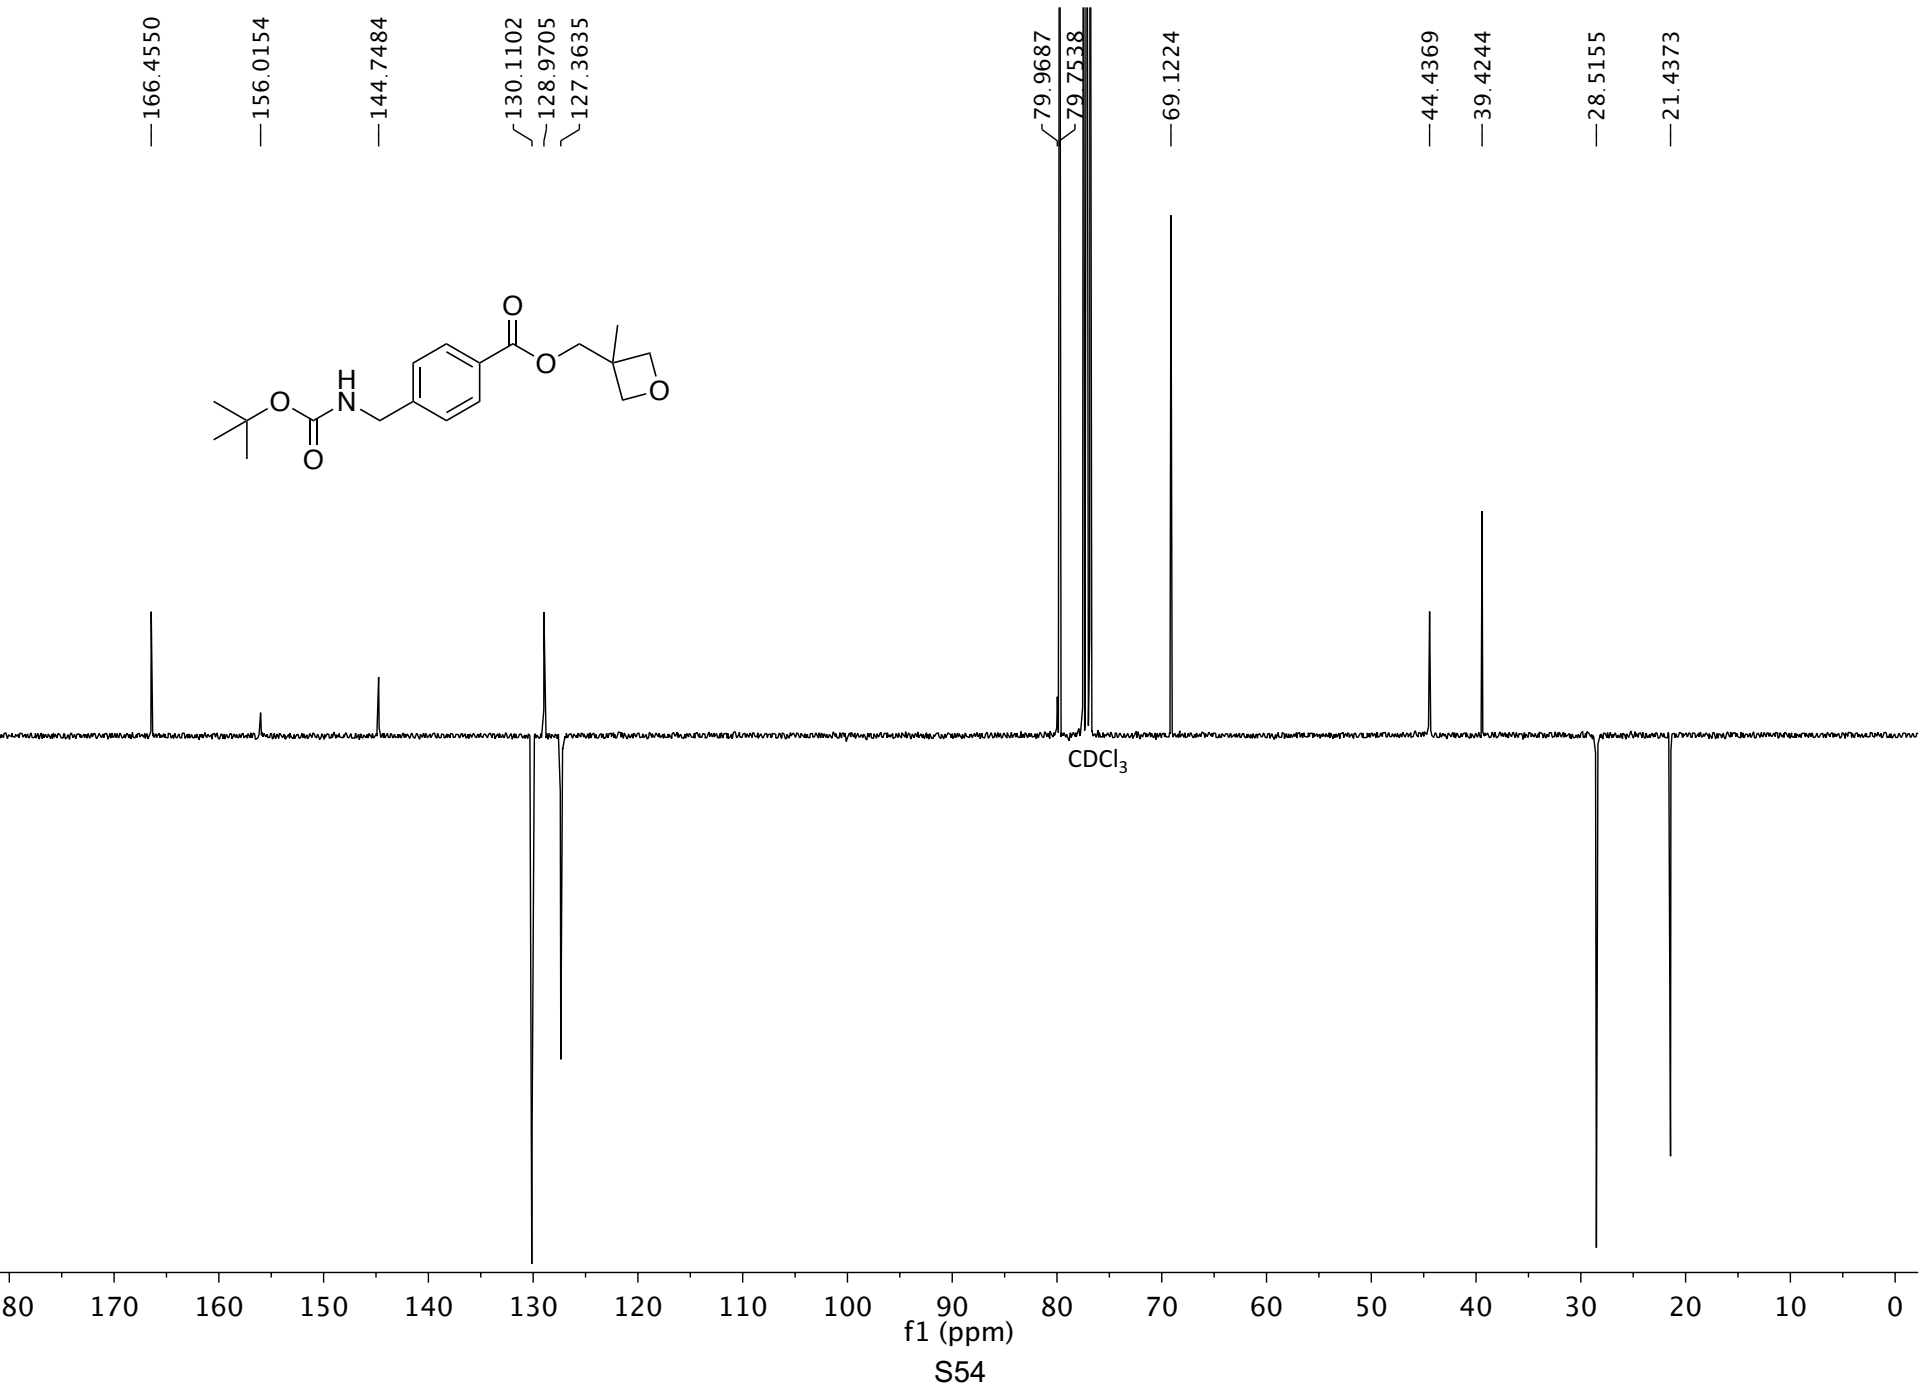

8.2892  
8.2667  
8.2203  
8.1978

4.6179  
4.6027  
4.4762  
4.4611  
4.4379

1.4204

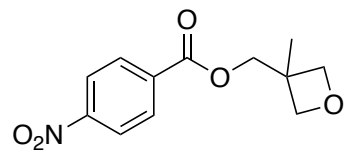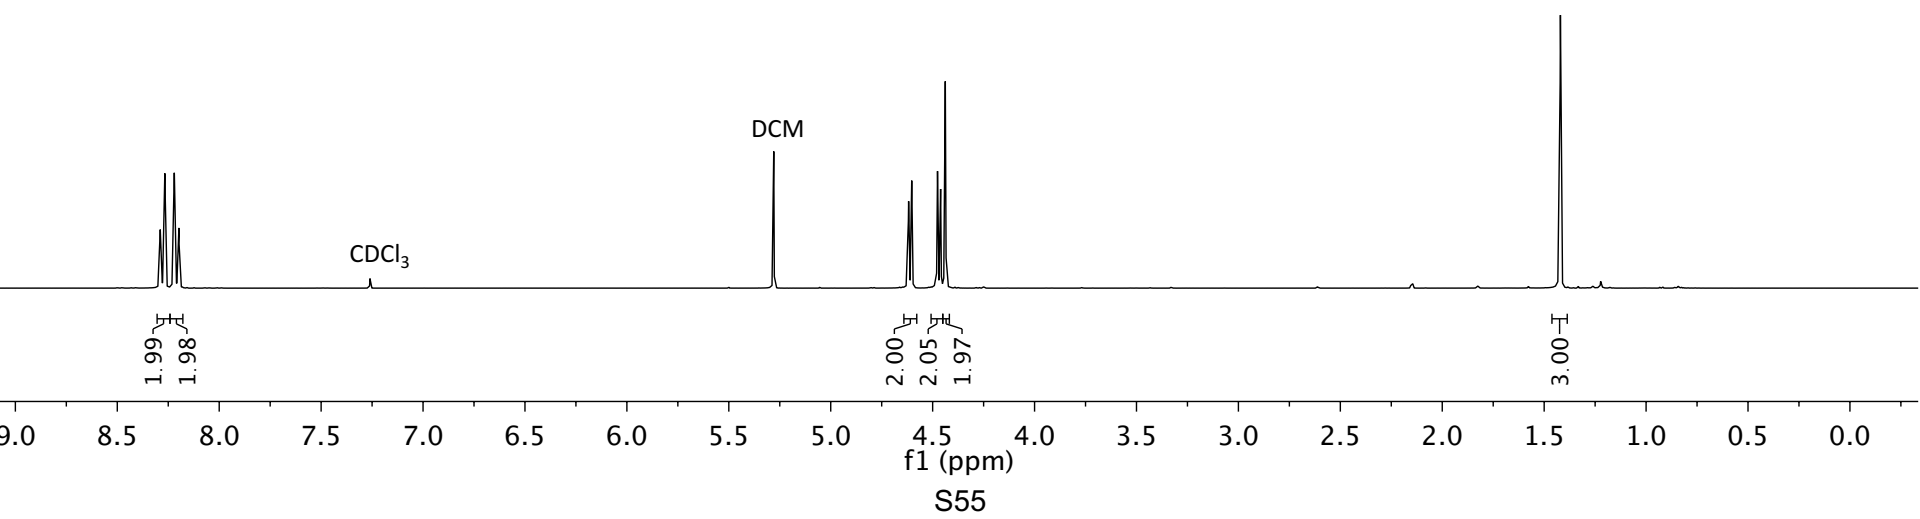

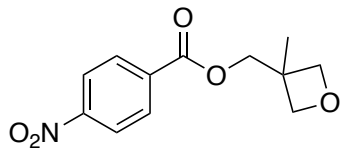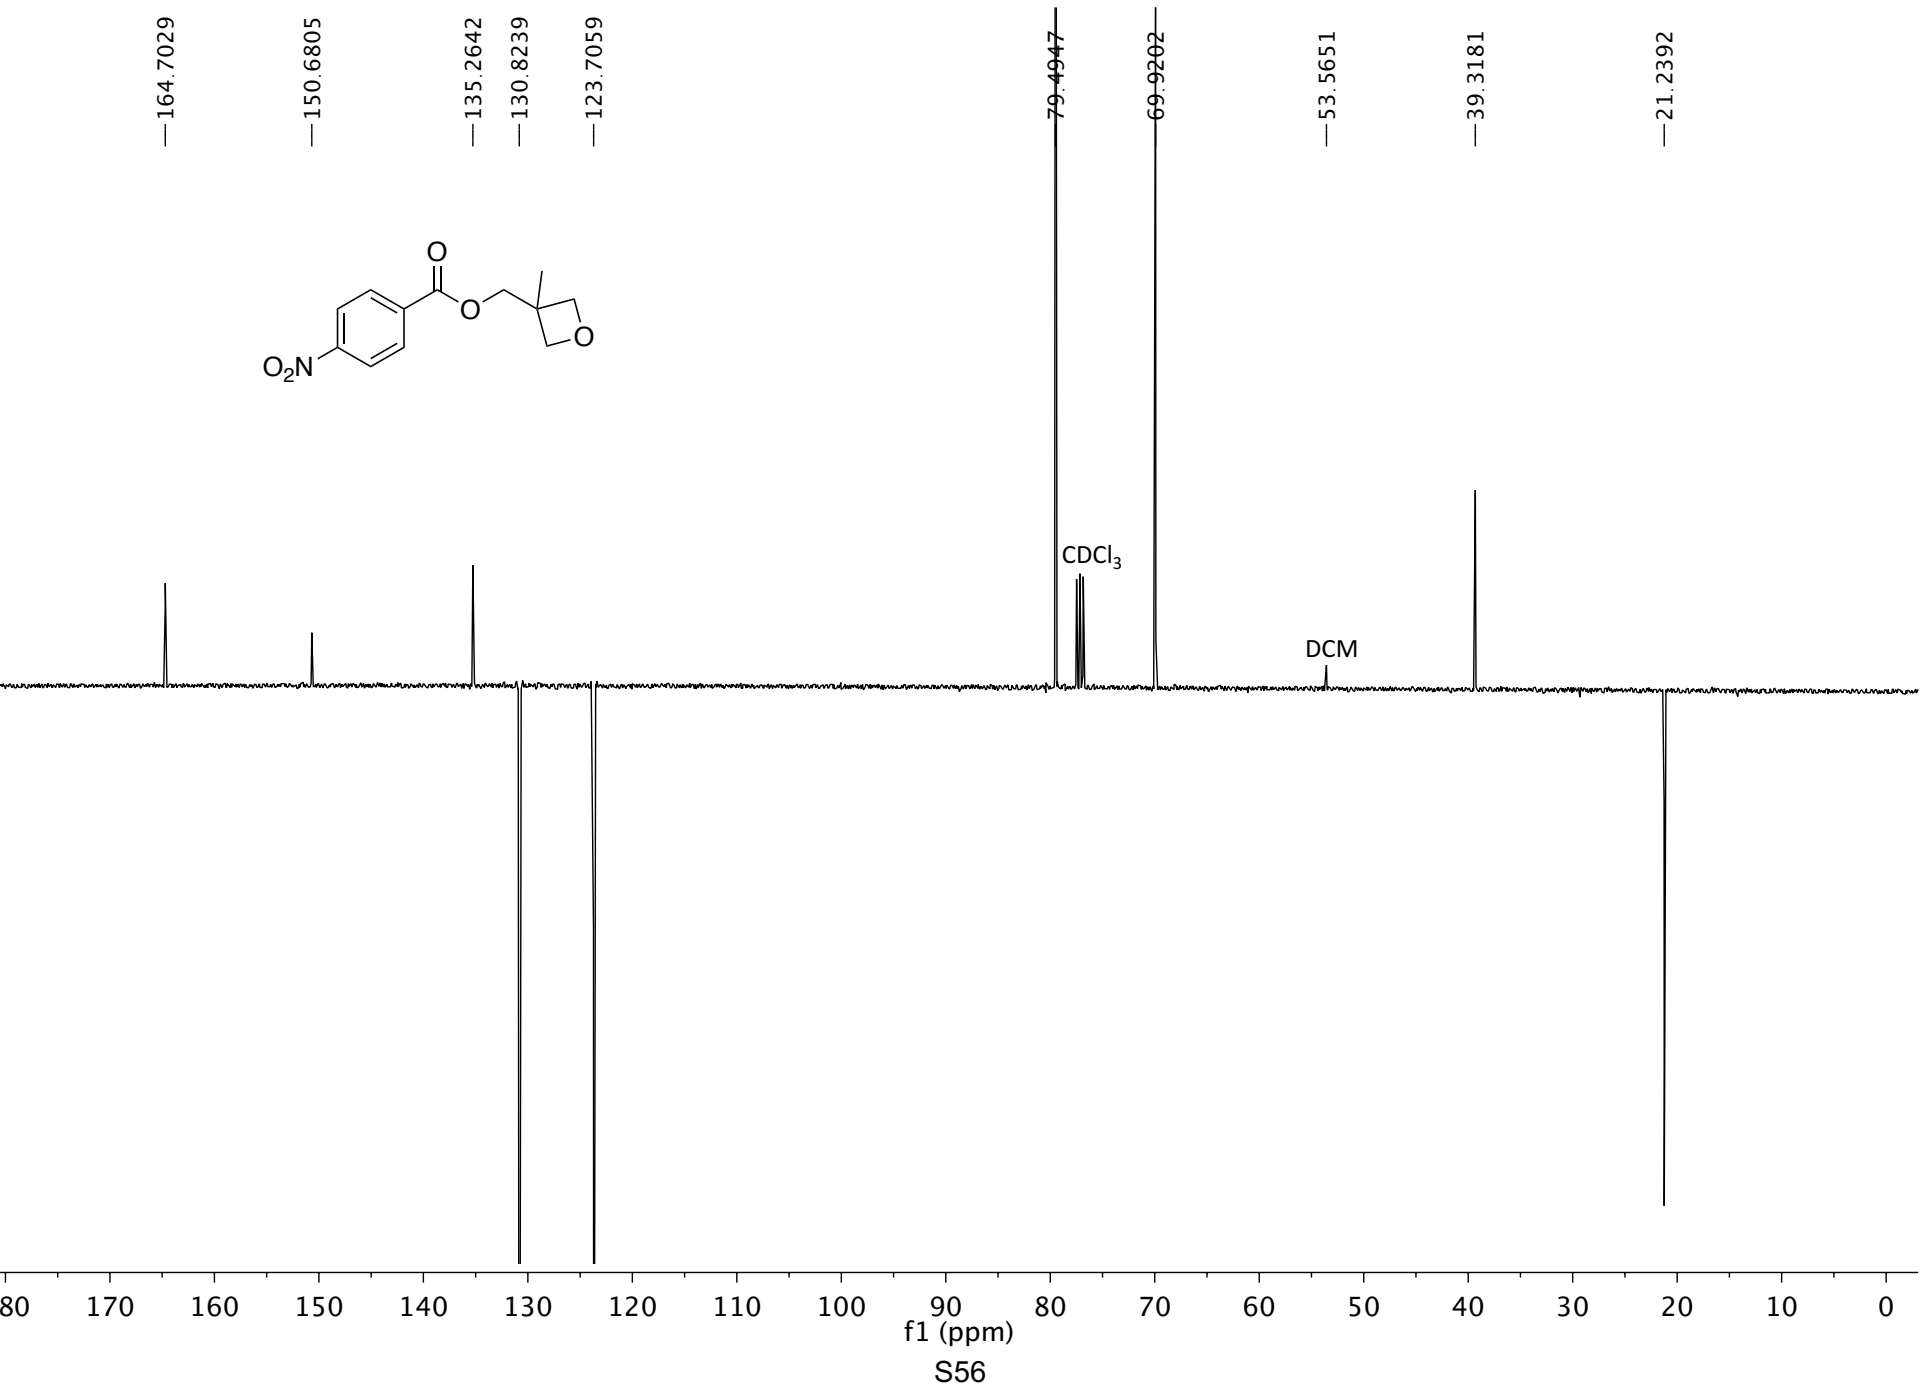



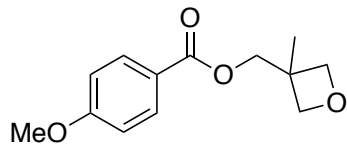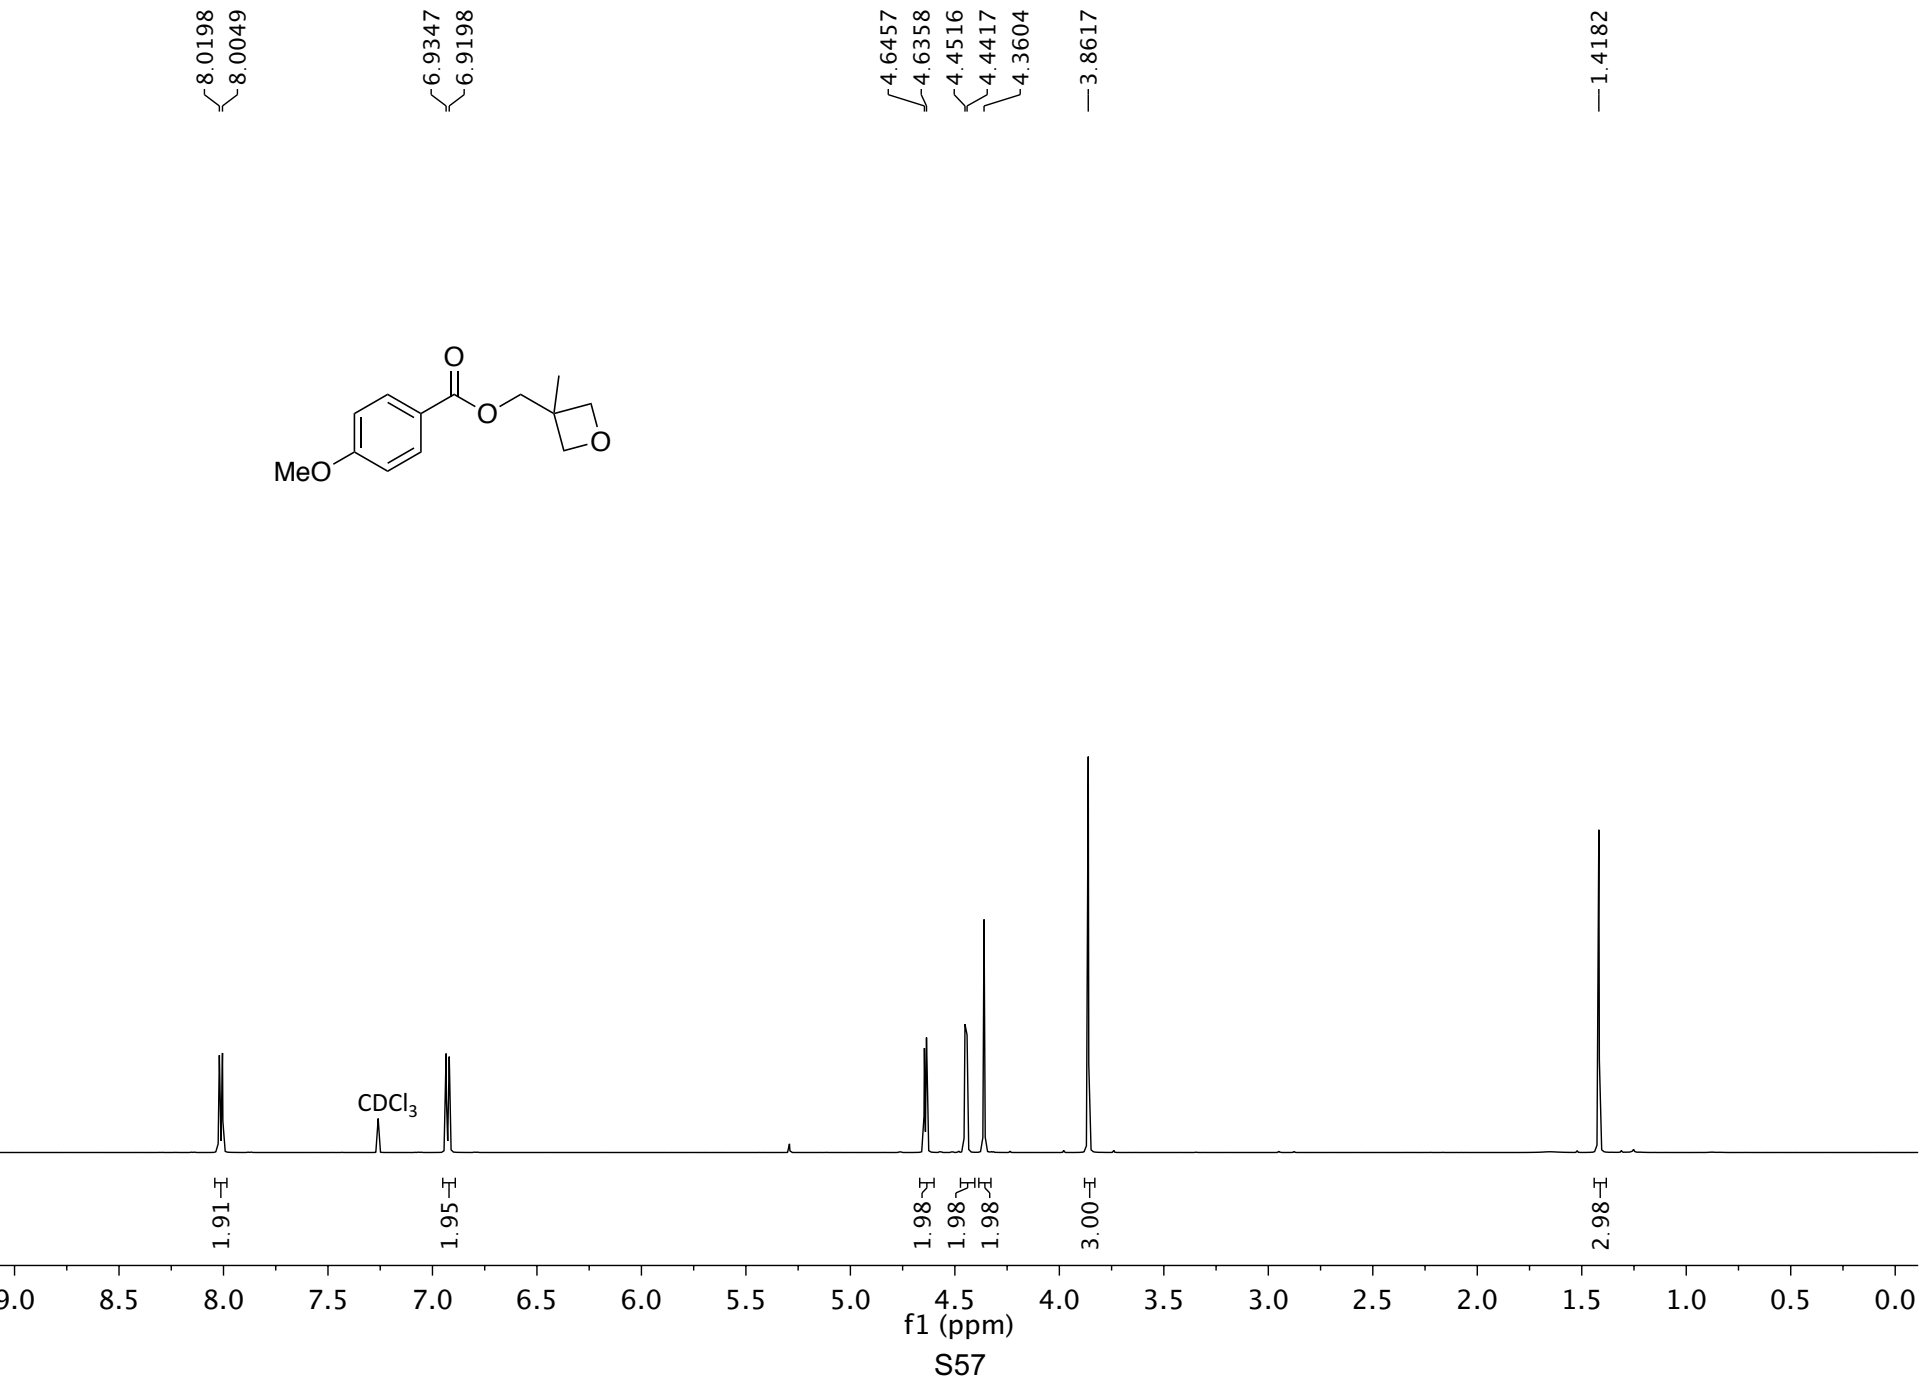

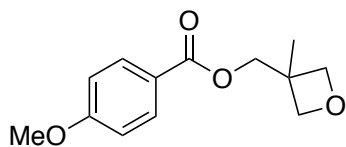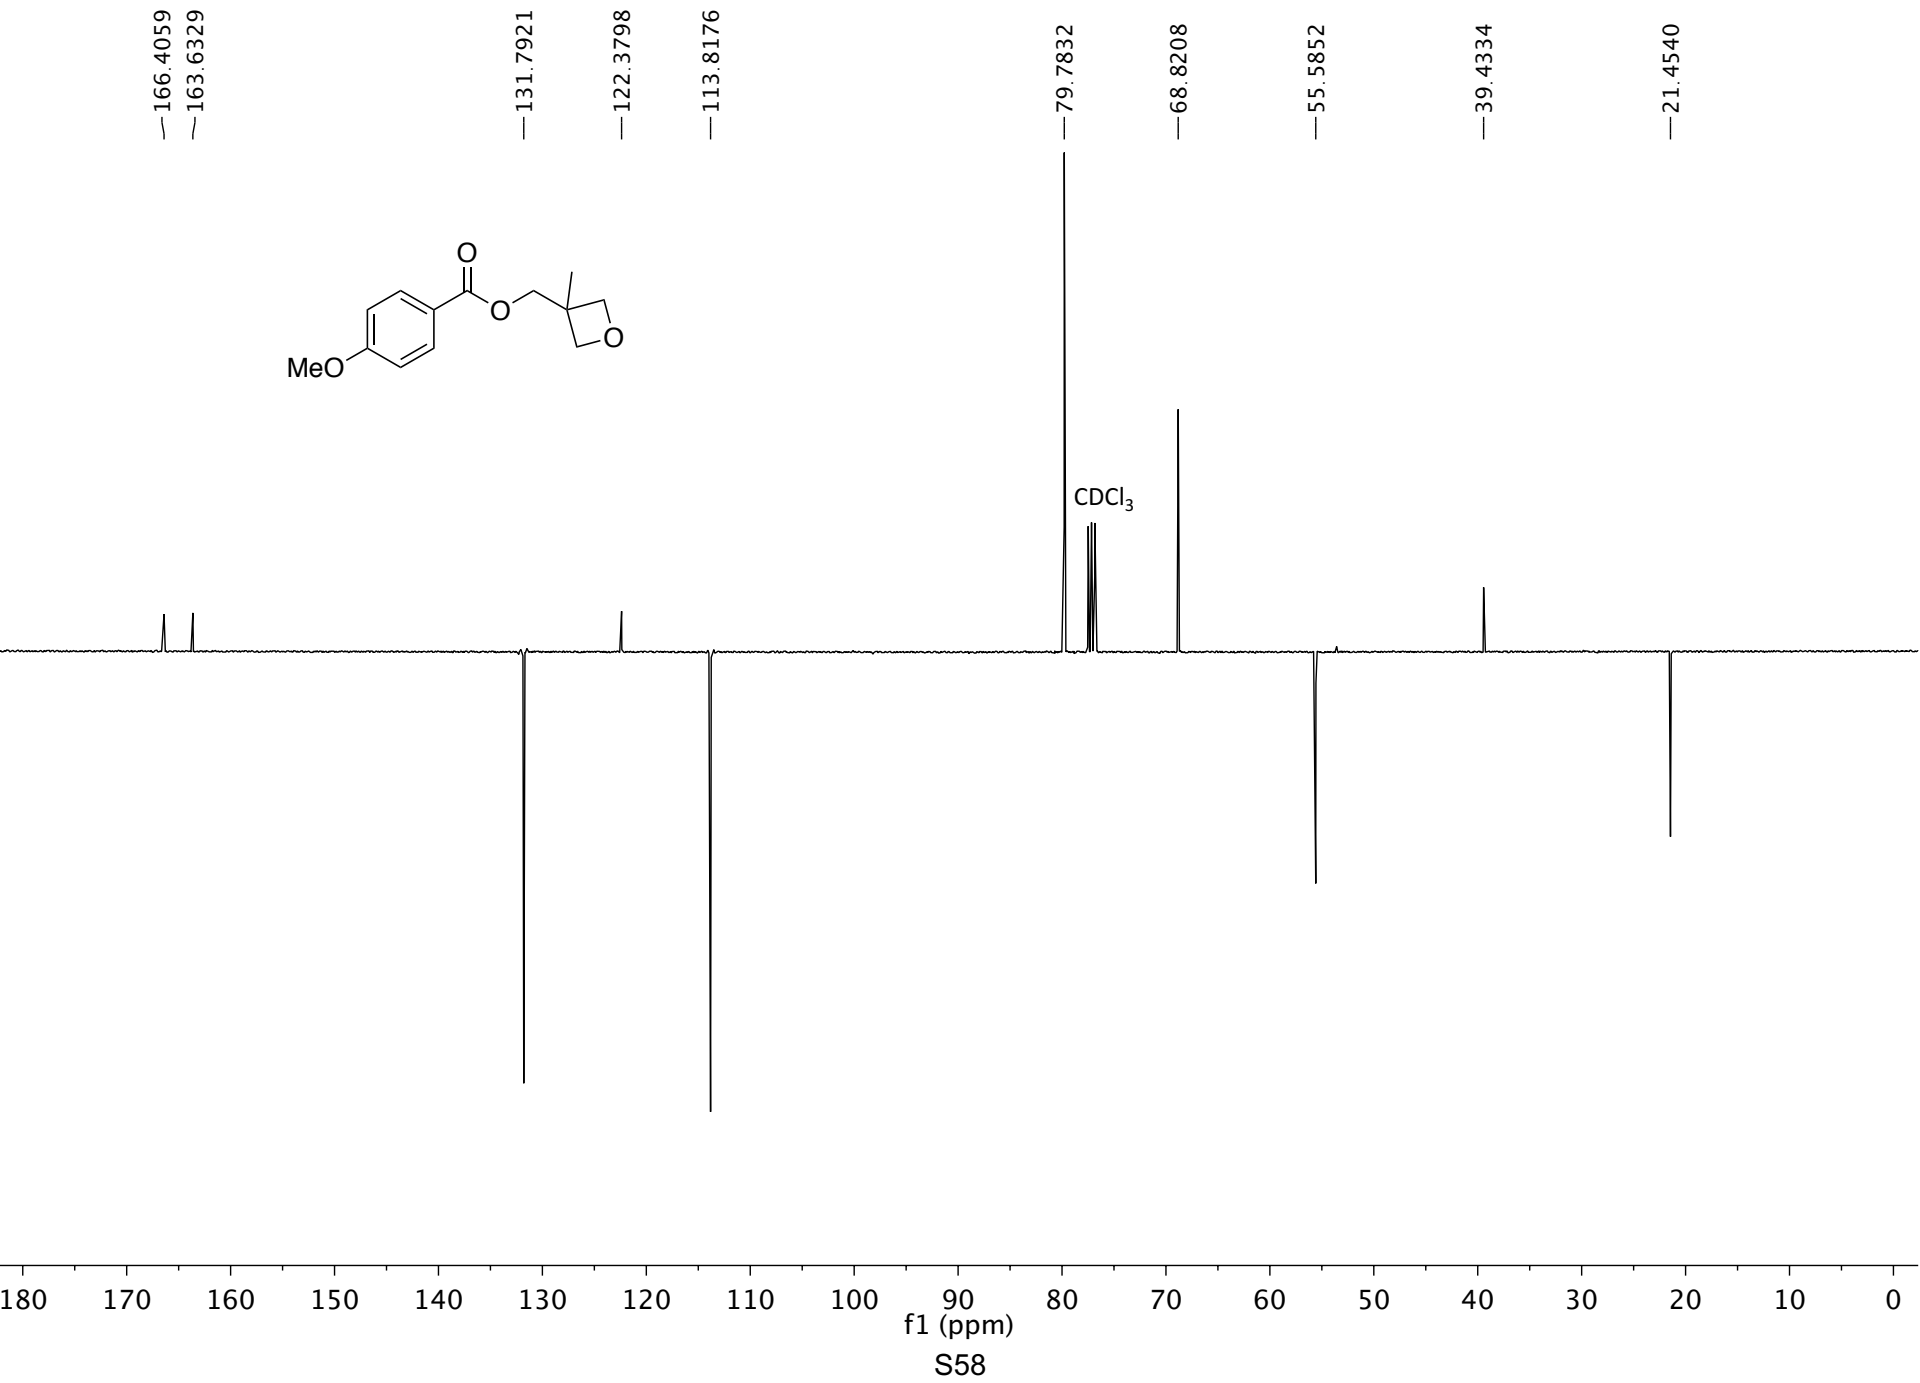

7.9544  
7.9330  
7.6323  
7.6110

4.6618  
4.6469  
4.4984  
4.4834  
4.4159

1.4465

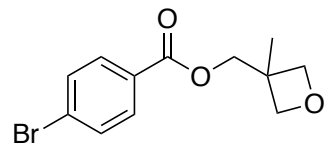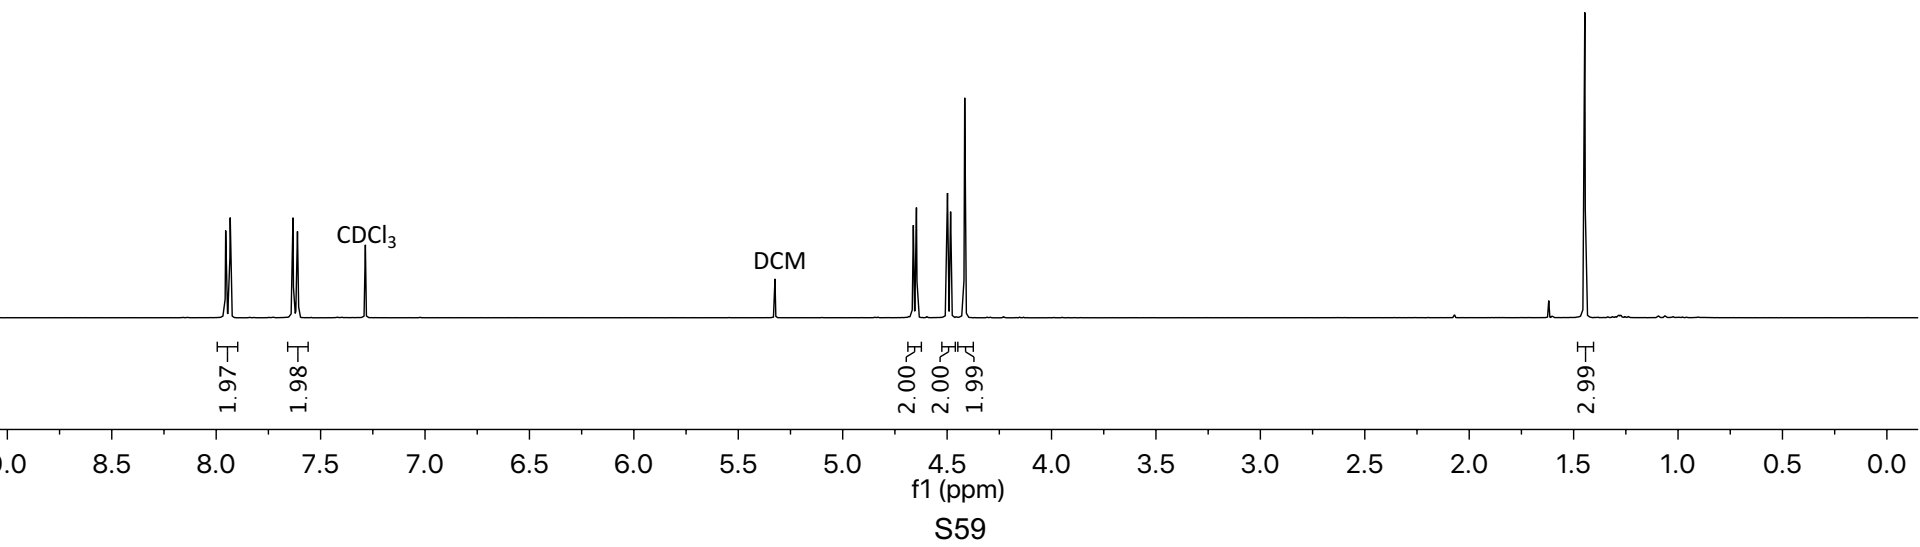

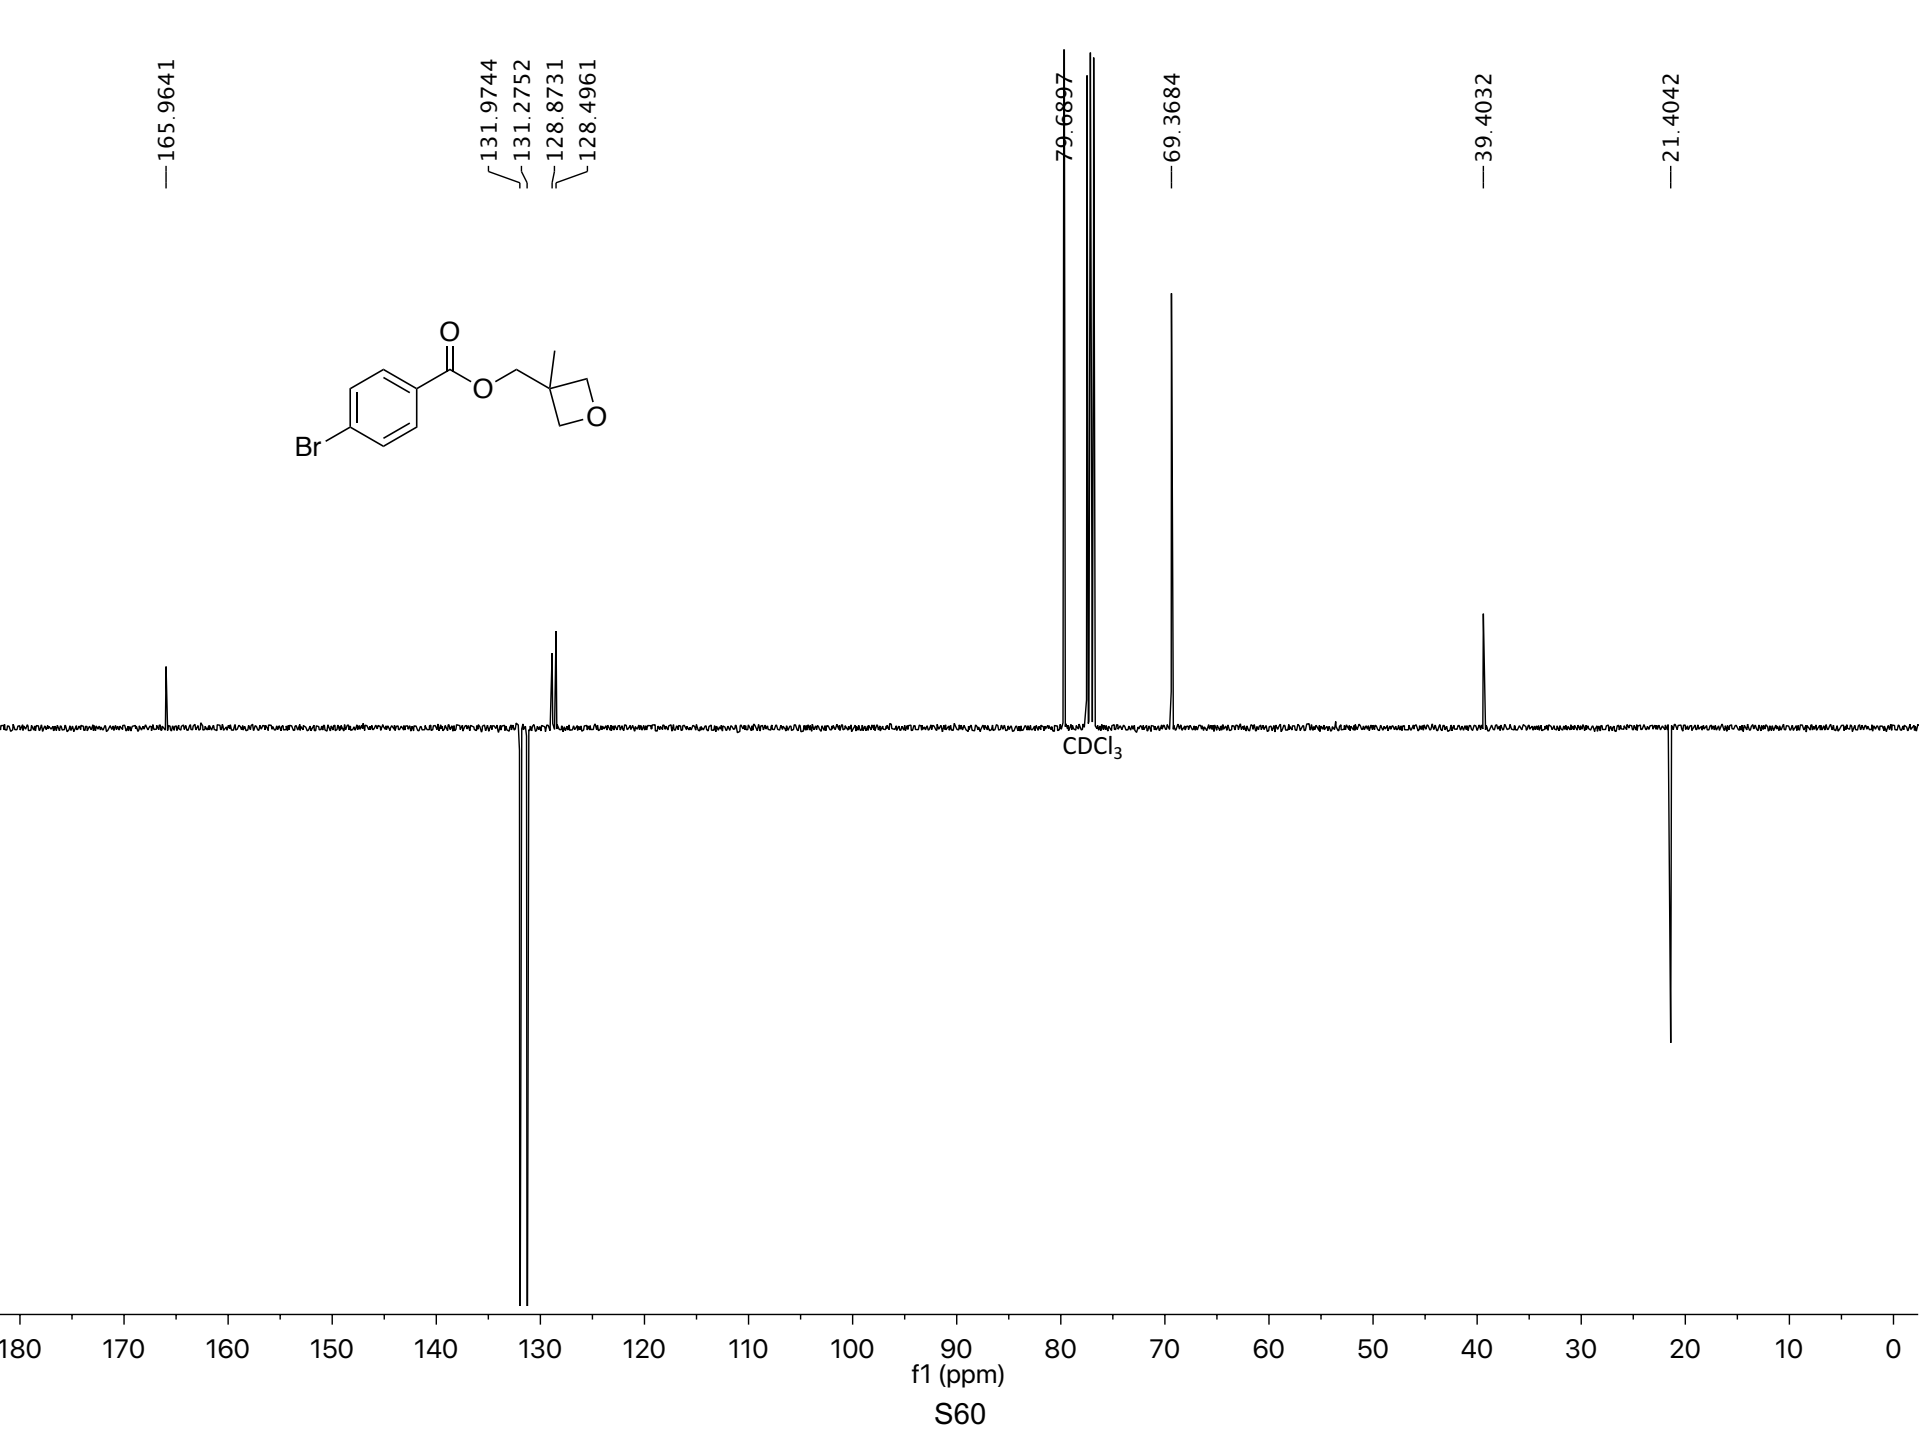

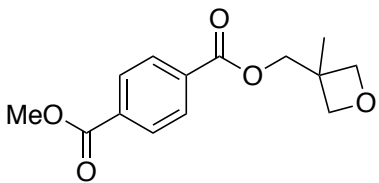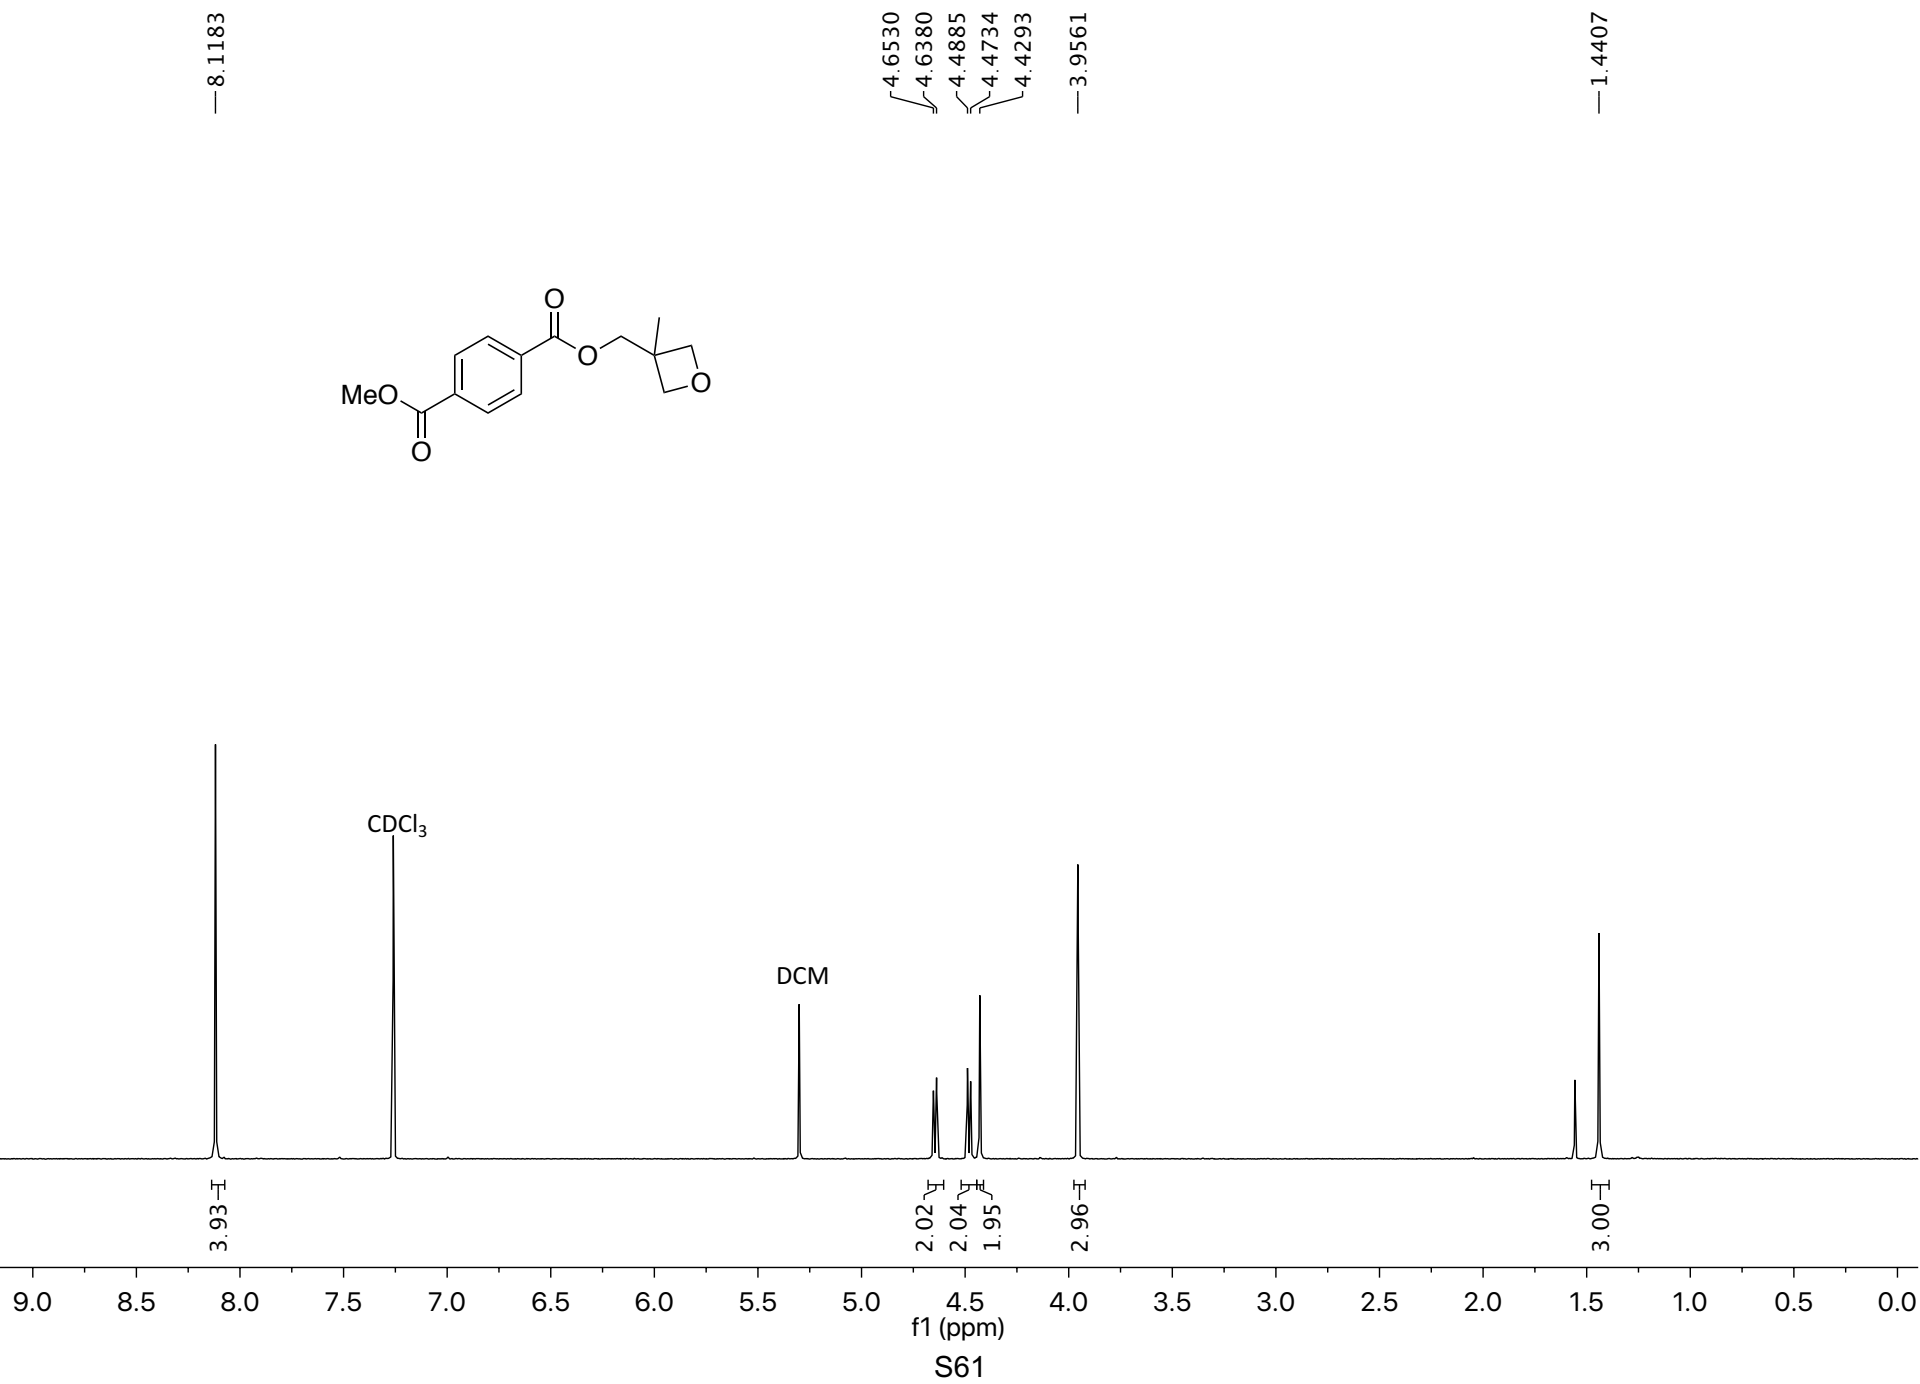

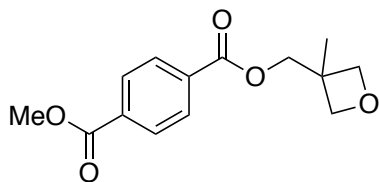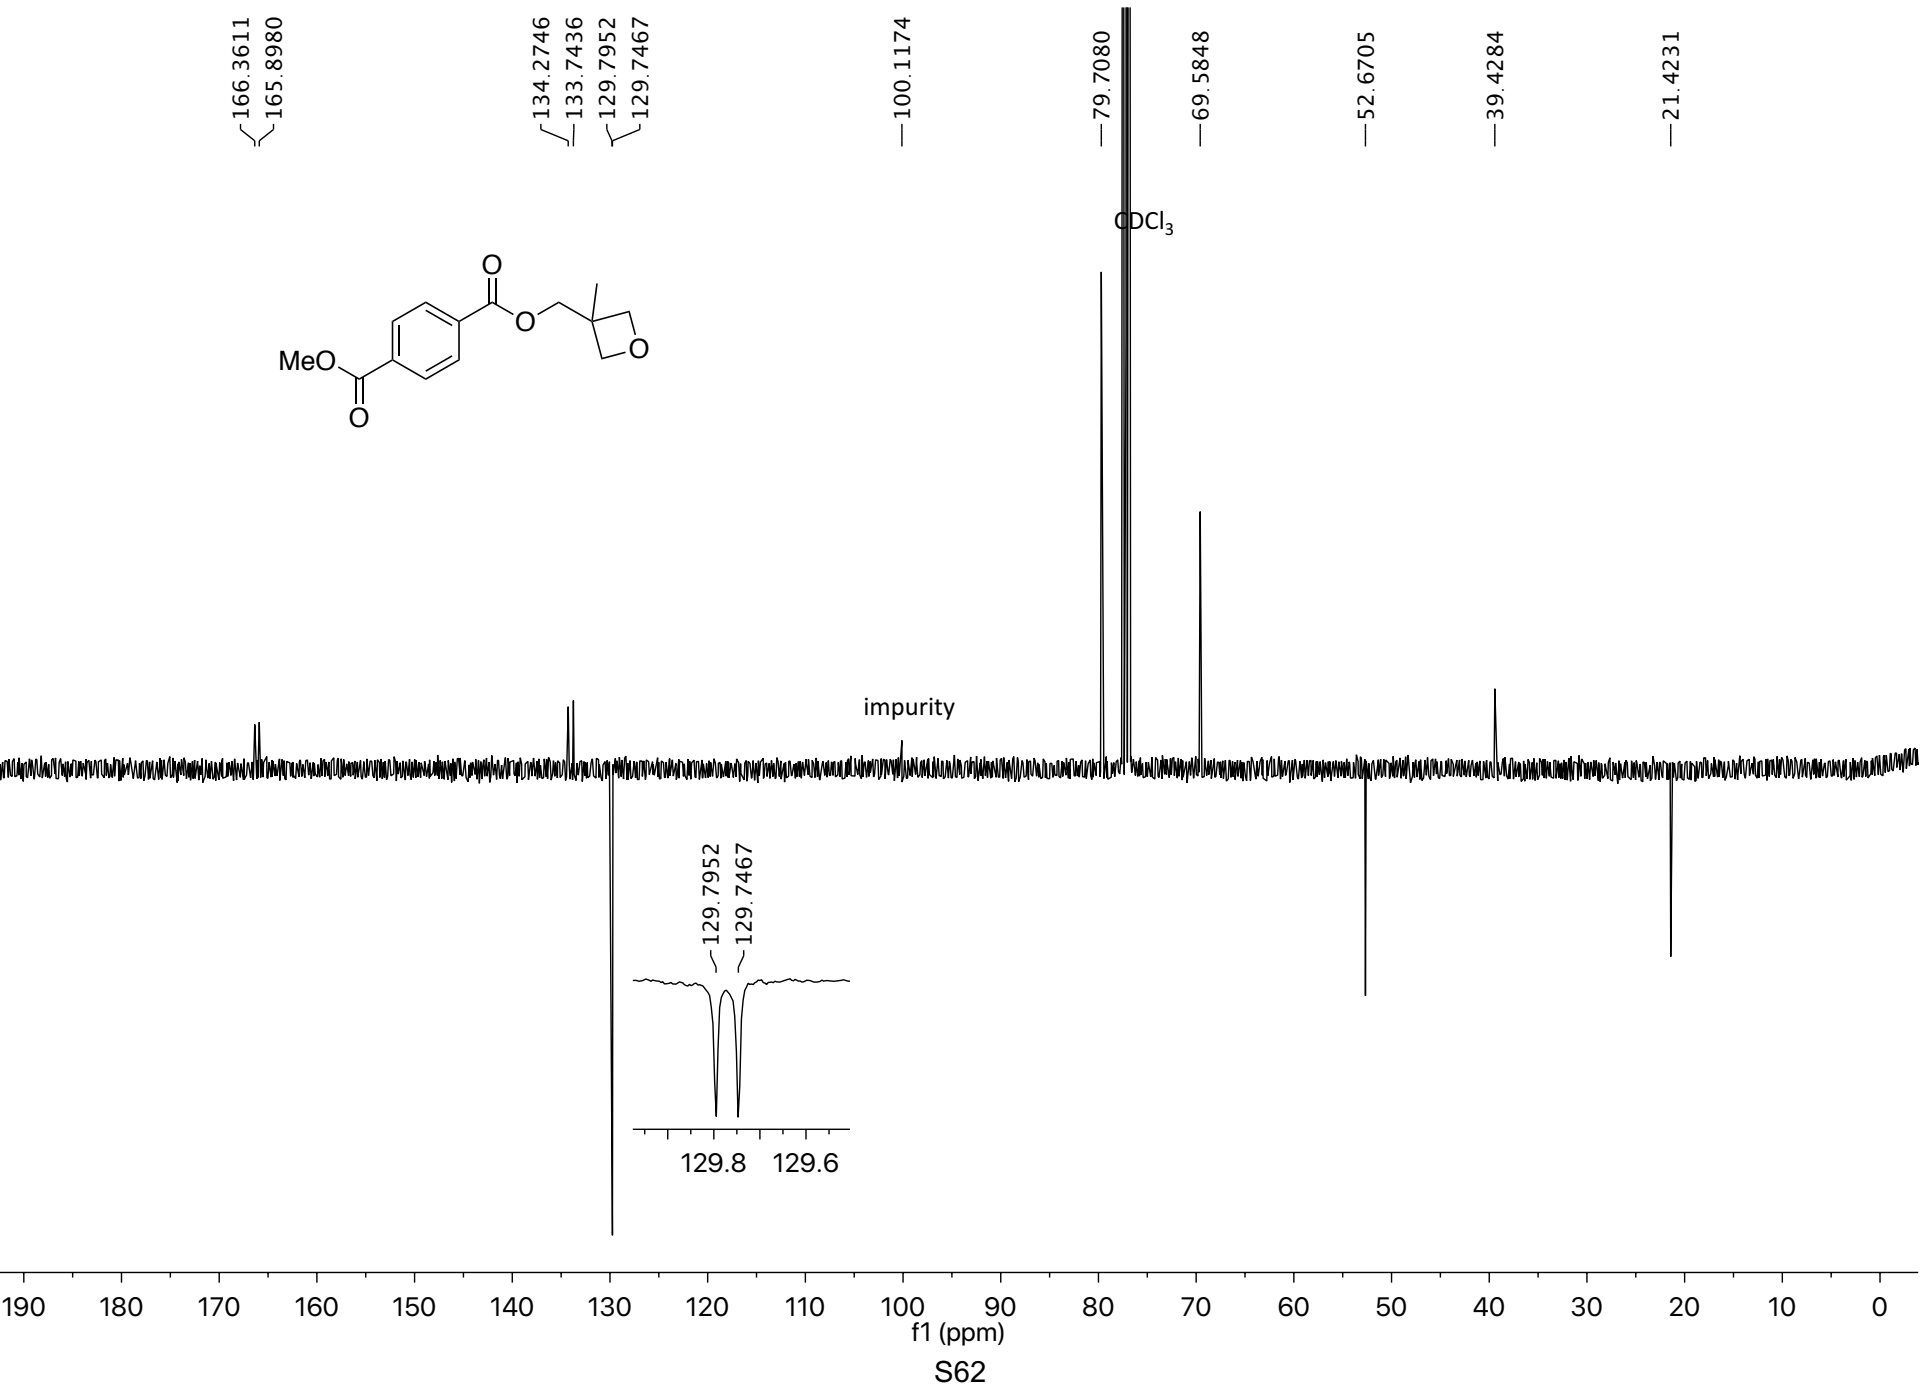

8.1735  
8.1522  
7.7768  
7.7556

4.6321  
4.6170  
4.4915  
4.4764  
4.4366

1.4292

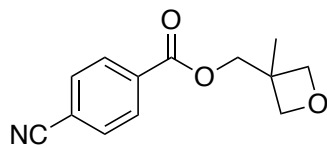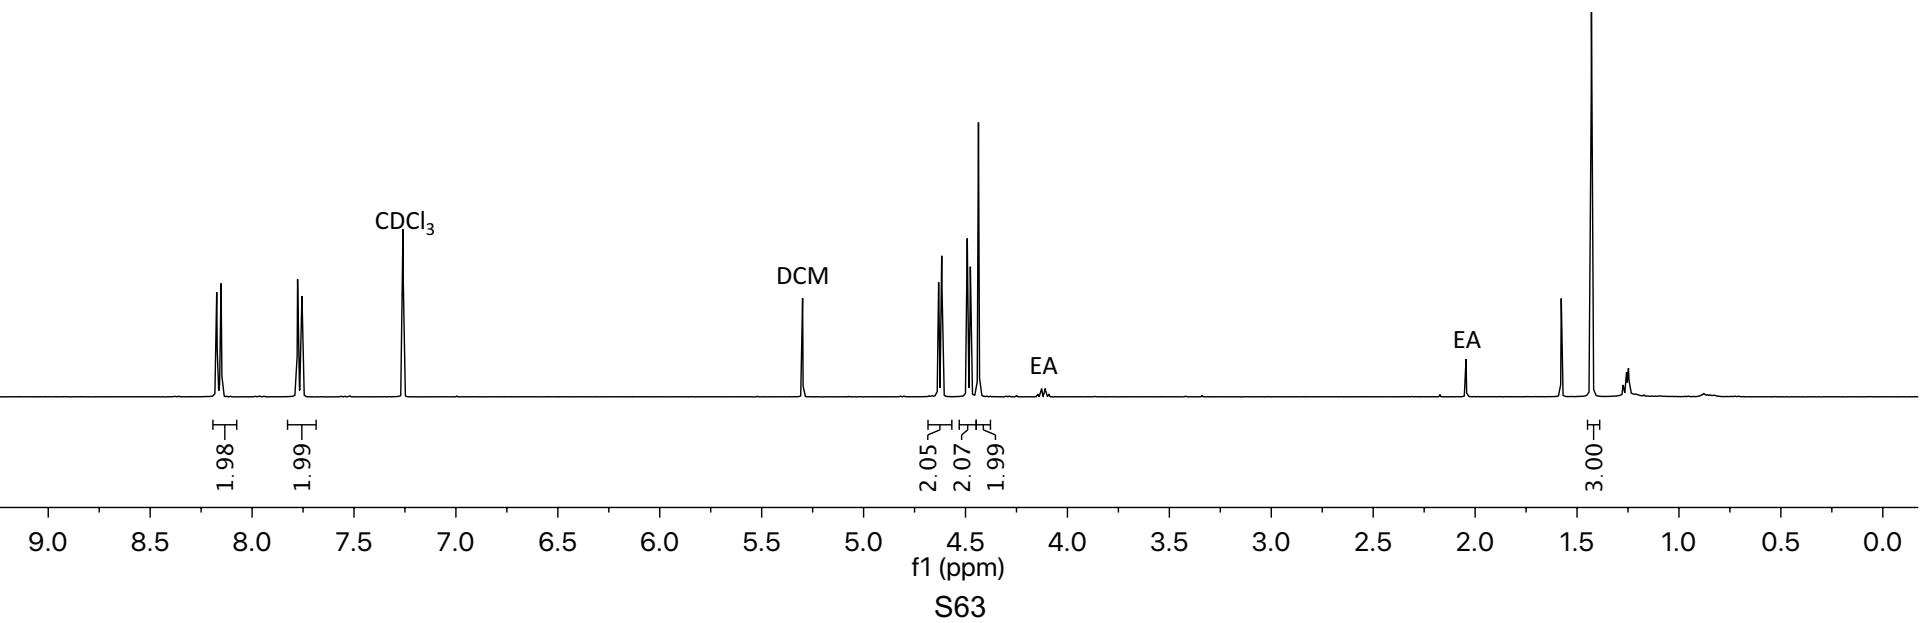

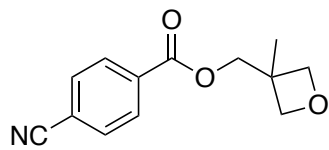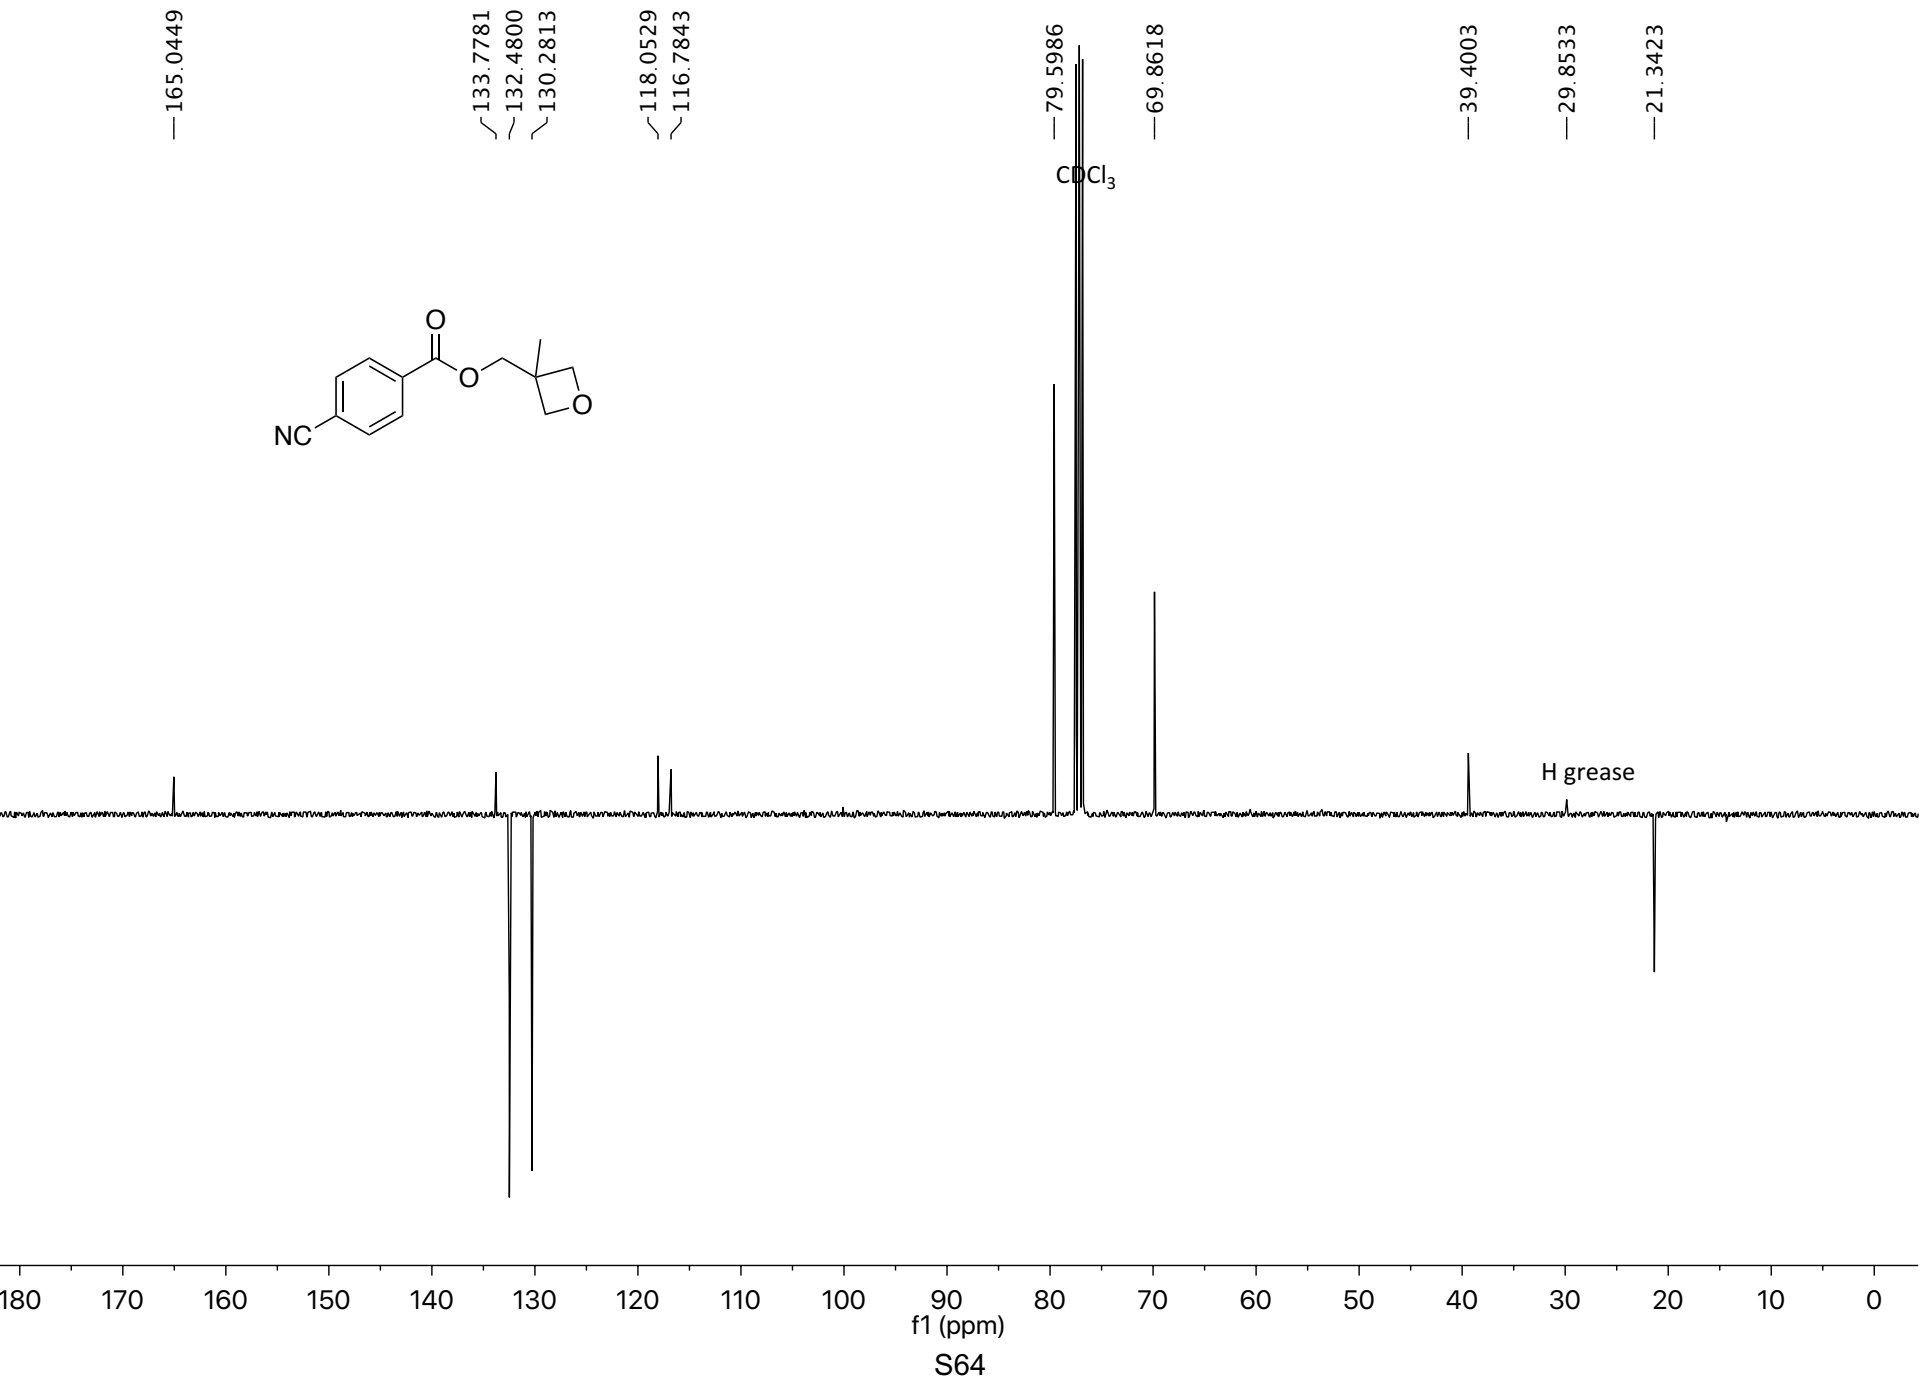



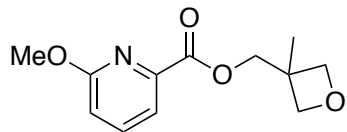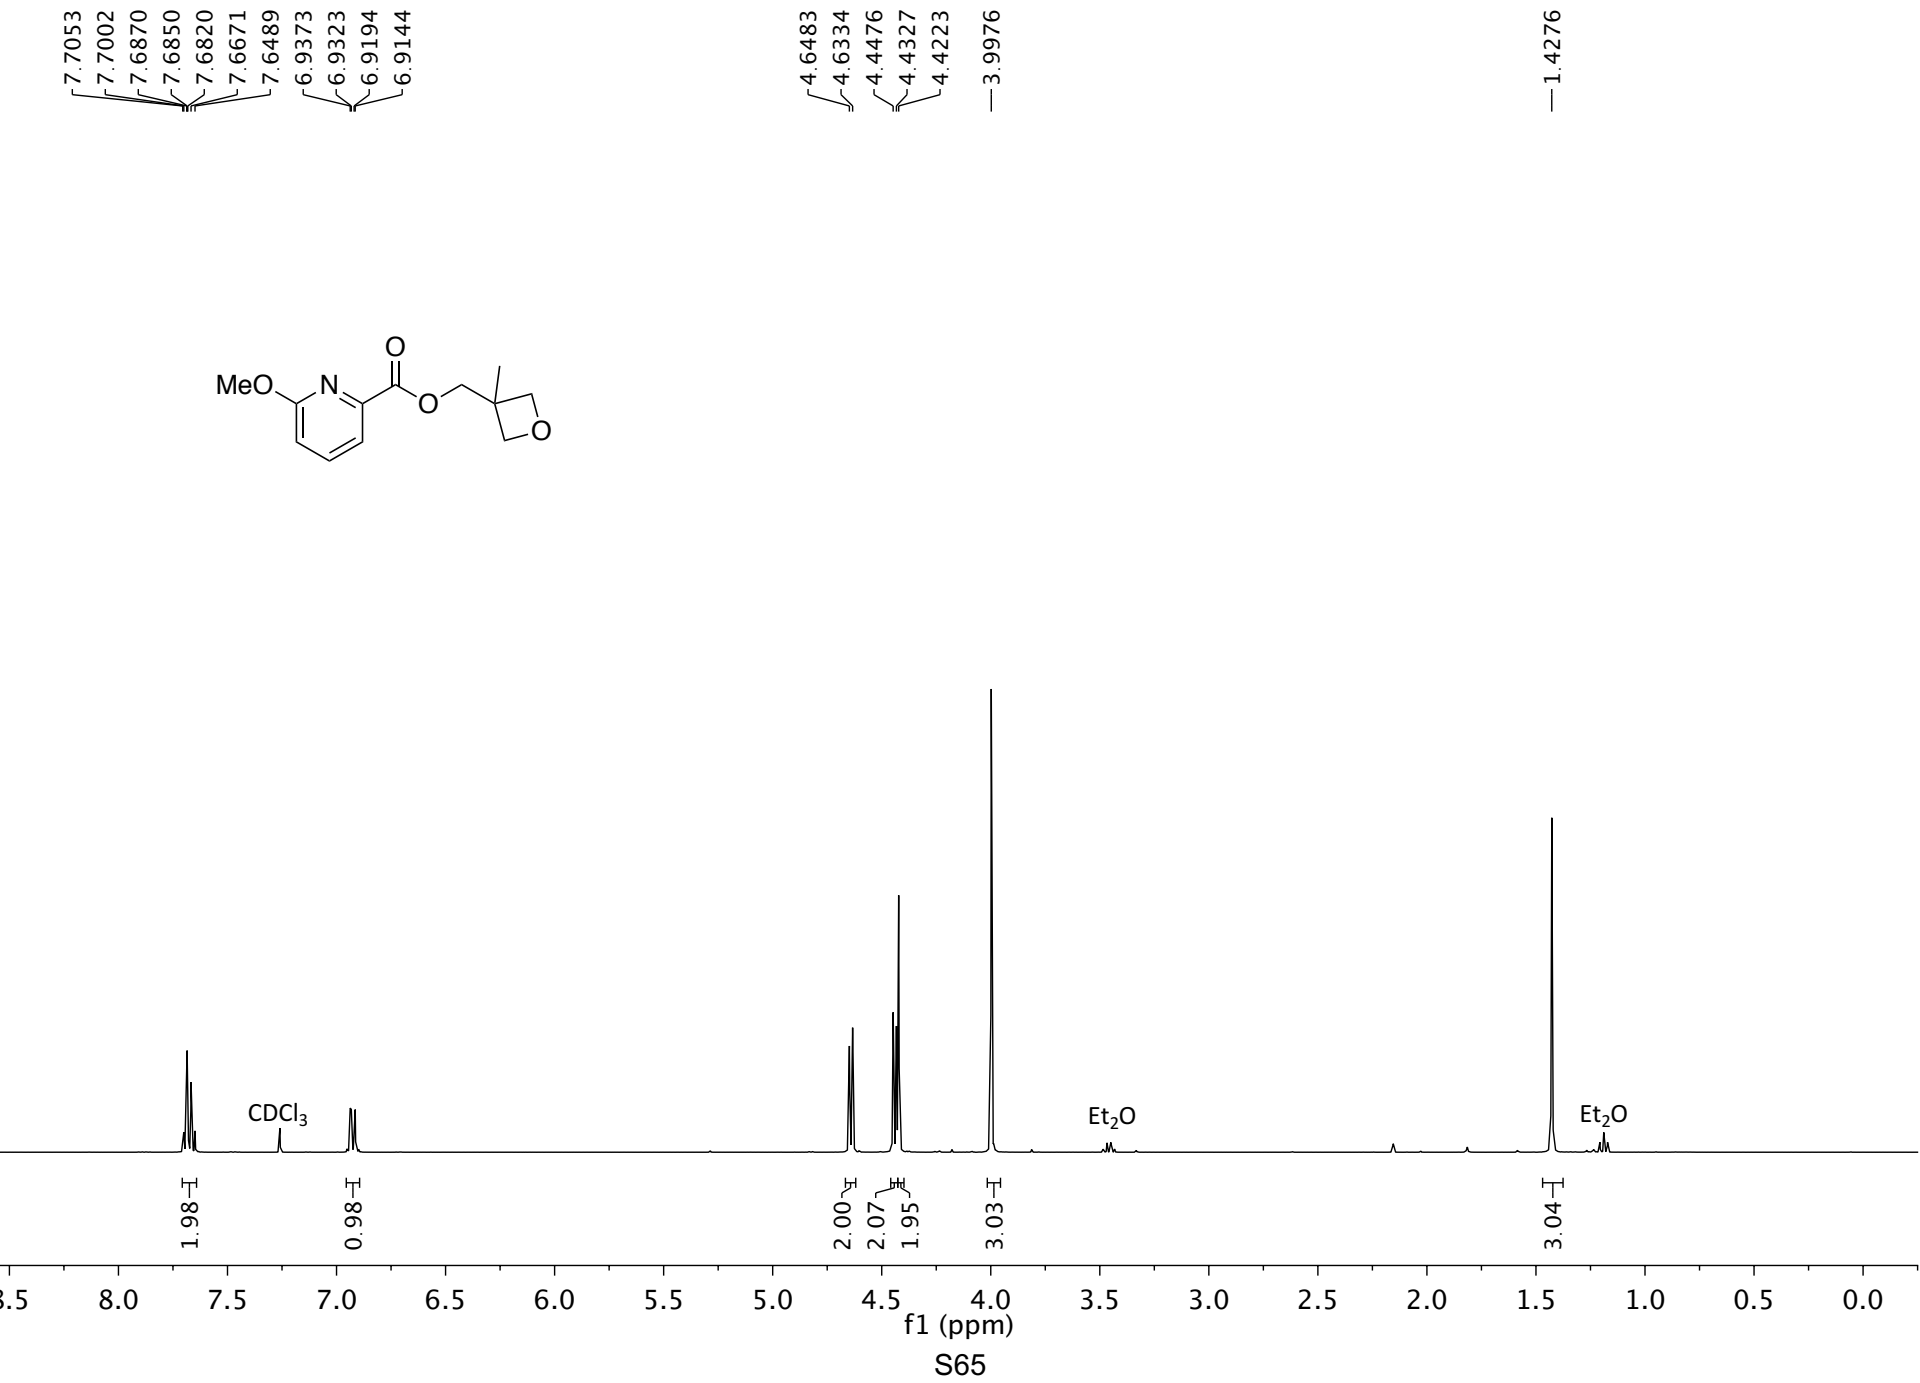

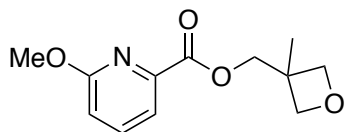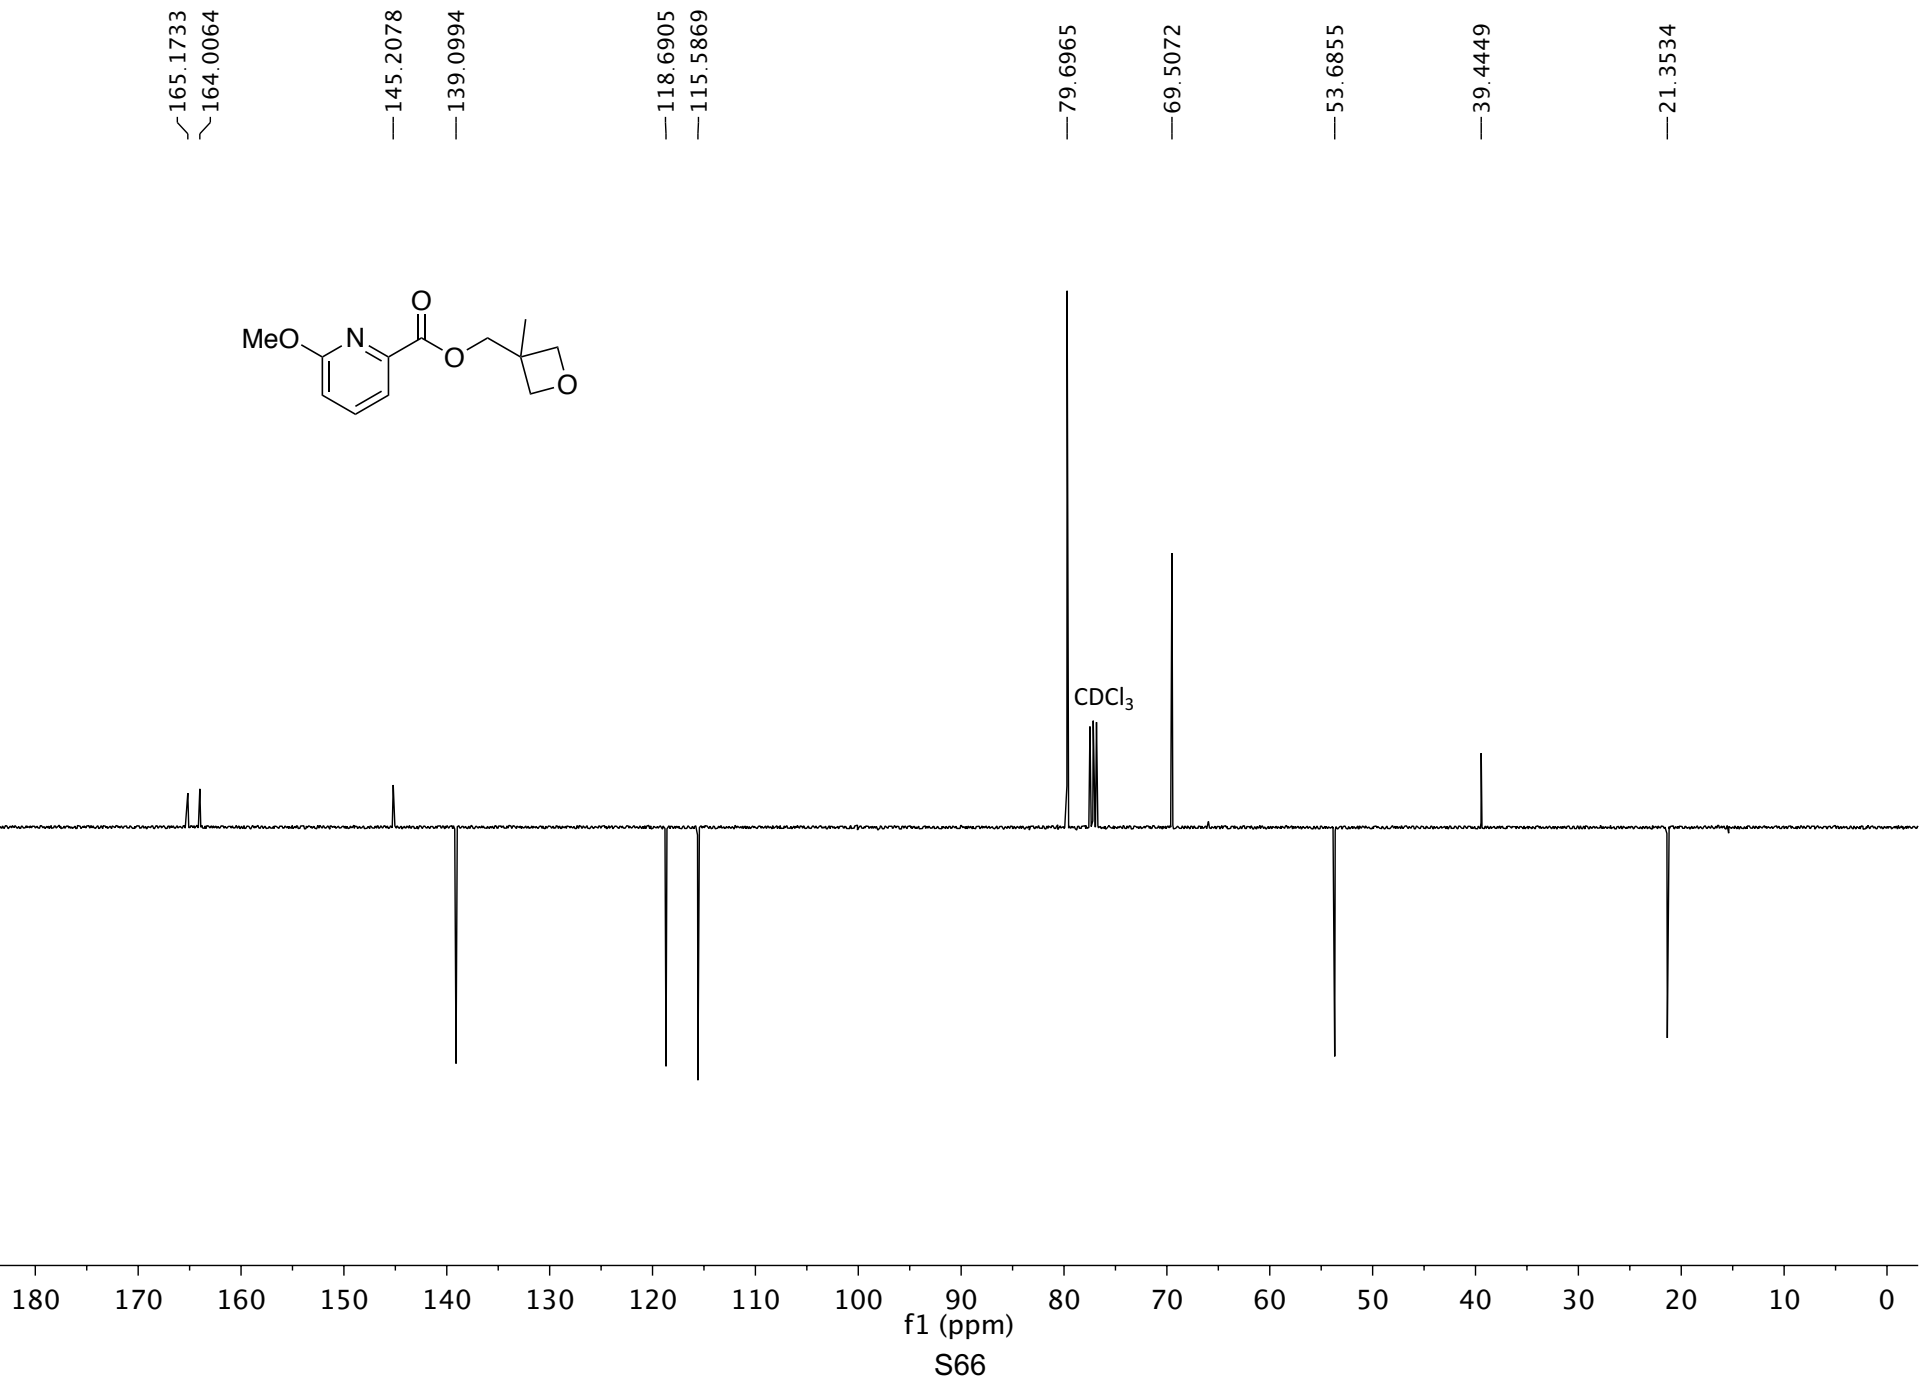

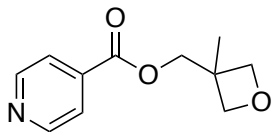

8.7921  
8.7771

7.8541  
7.8390

4.6129  
4.5979  
4.4713  
4.4562  
4.4259

1.4145

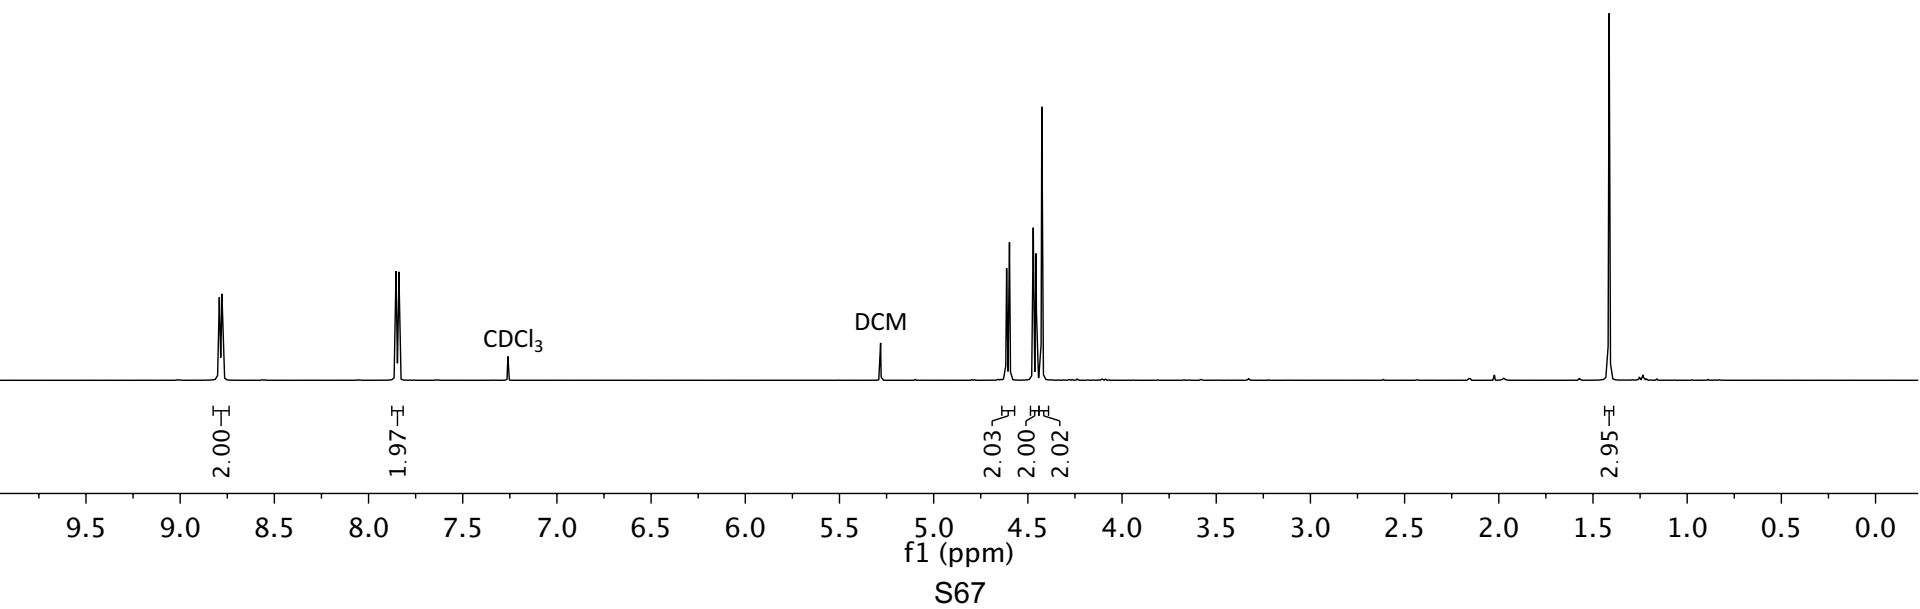

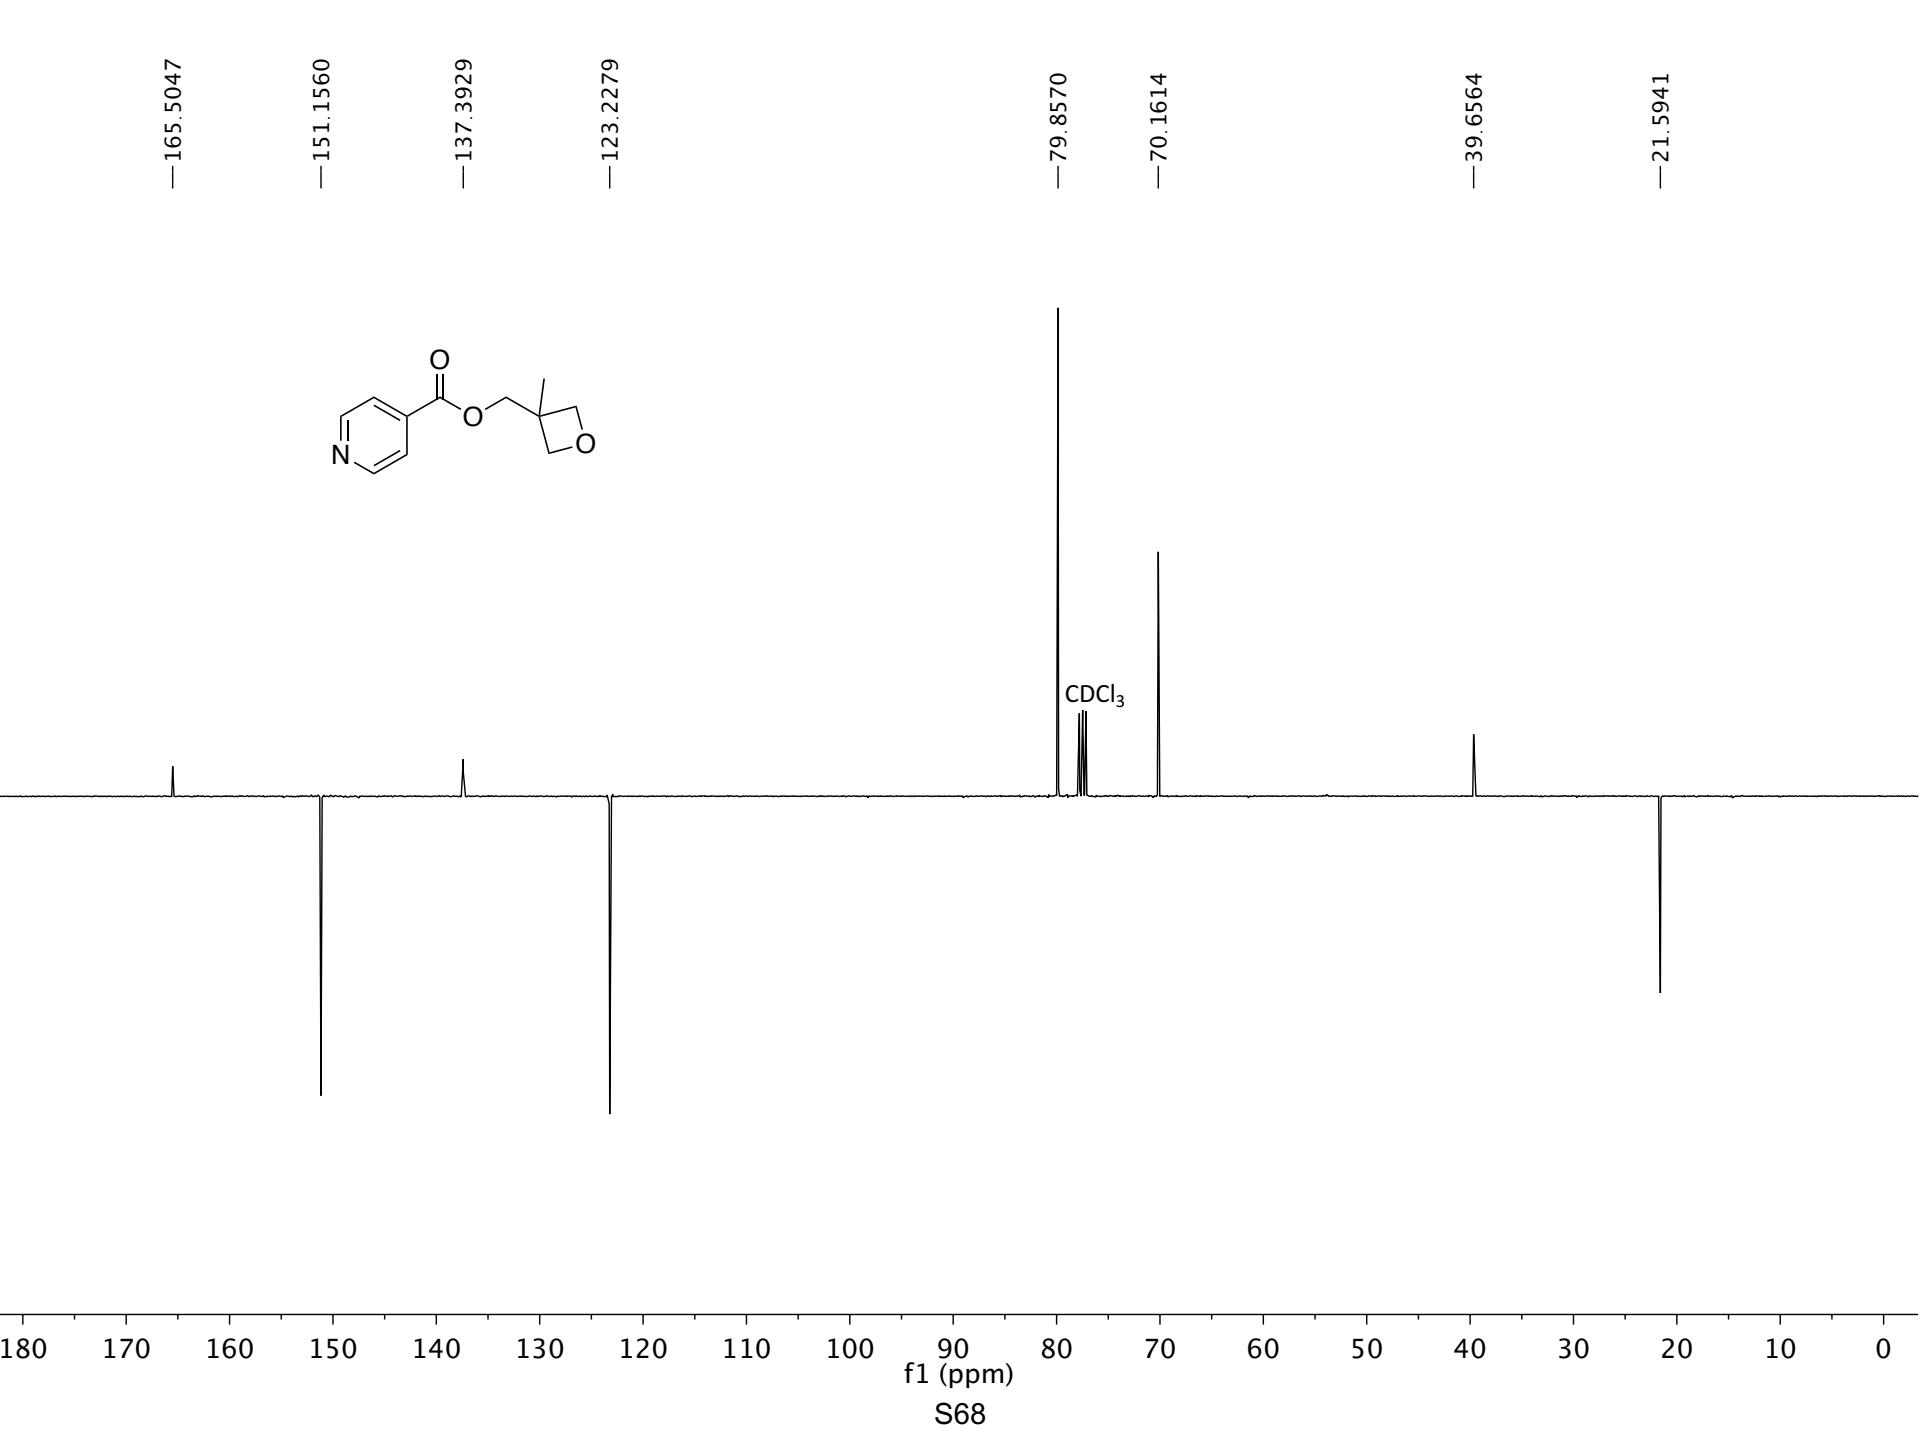

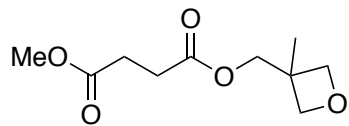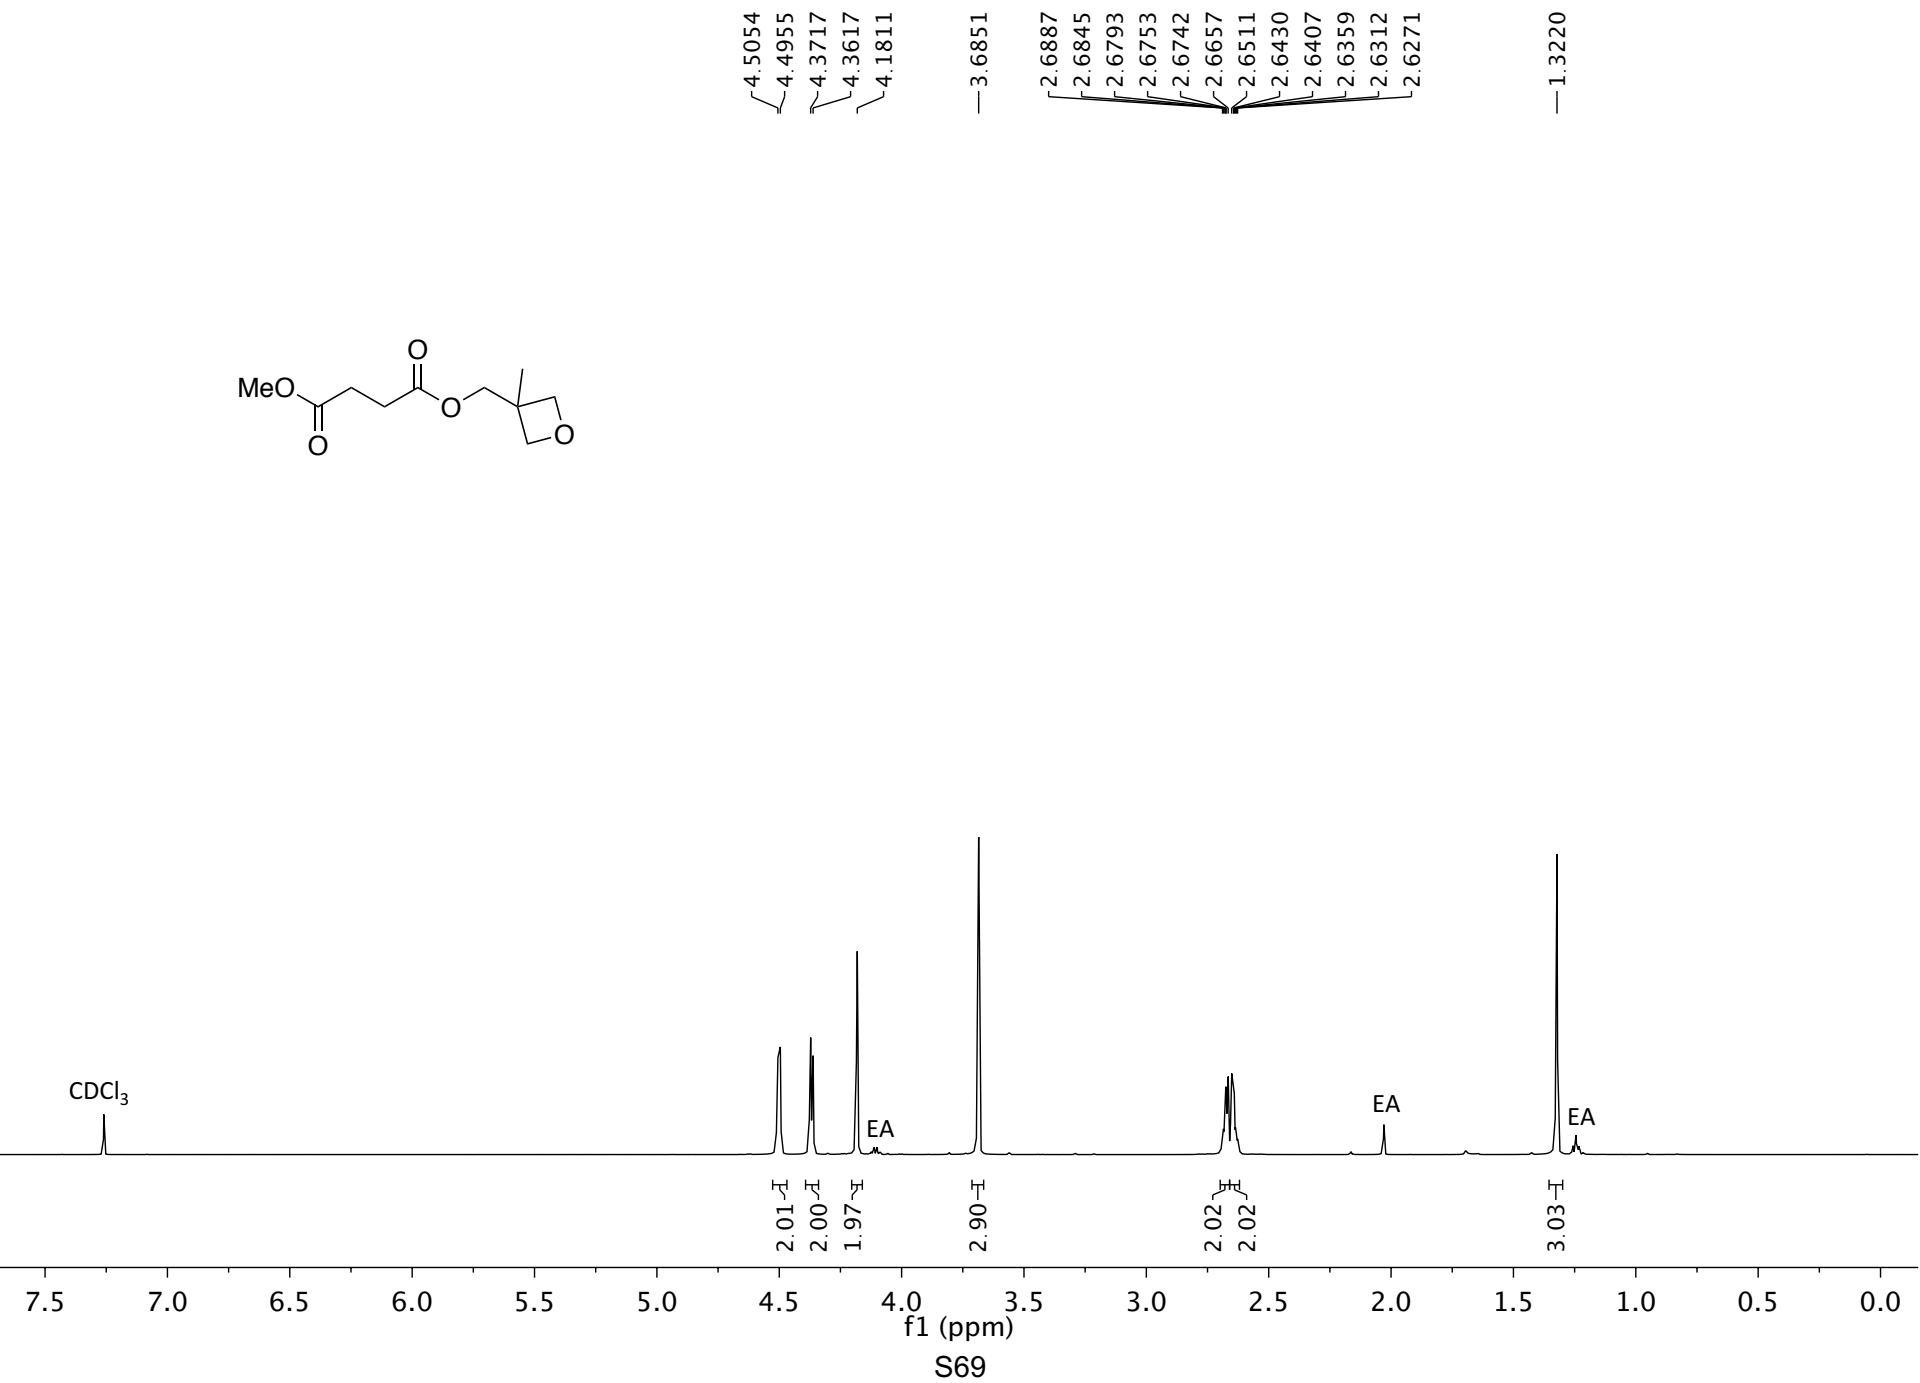

172.7884  
172.4388

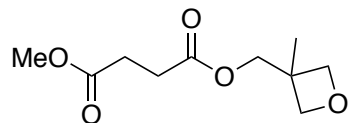

79.6167

69.0103

52.0354

39.1594

29.1234

28.9435

21.2502

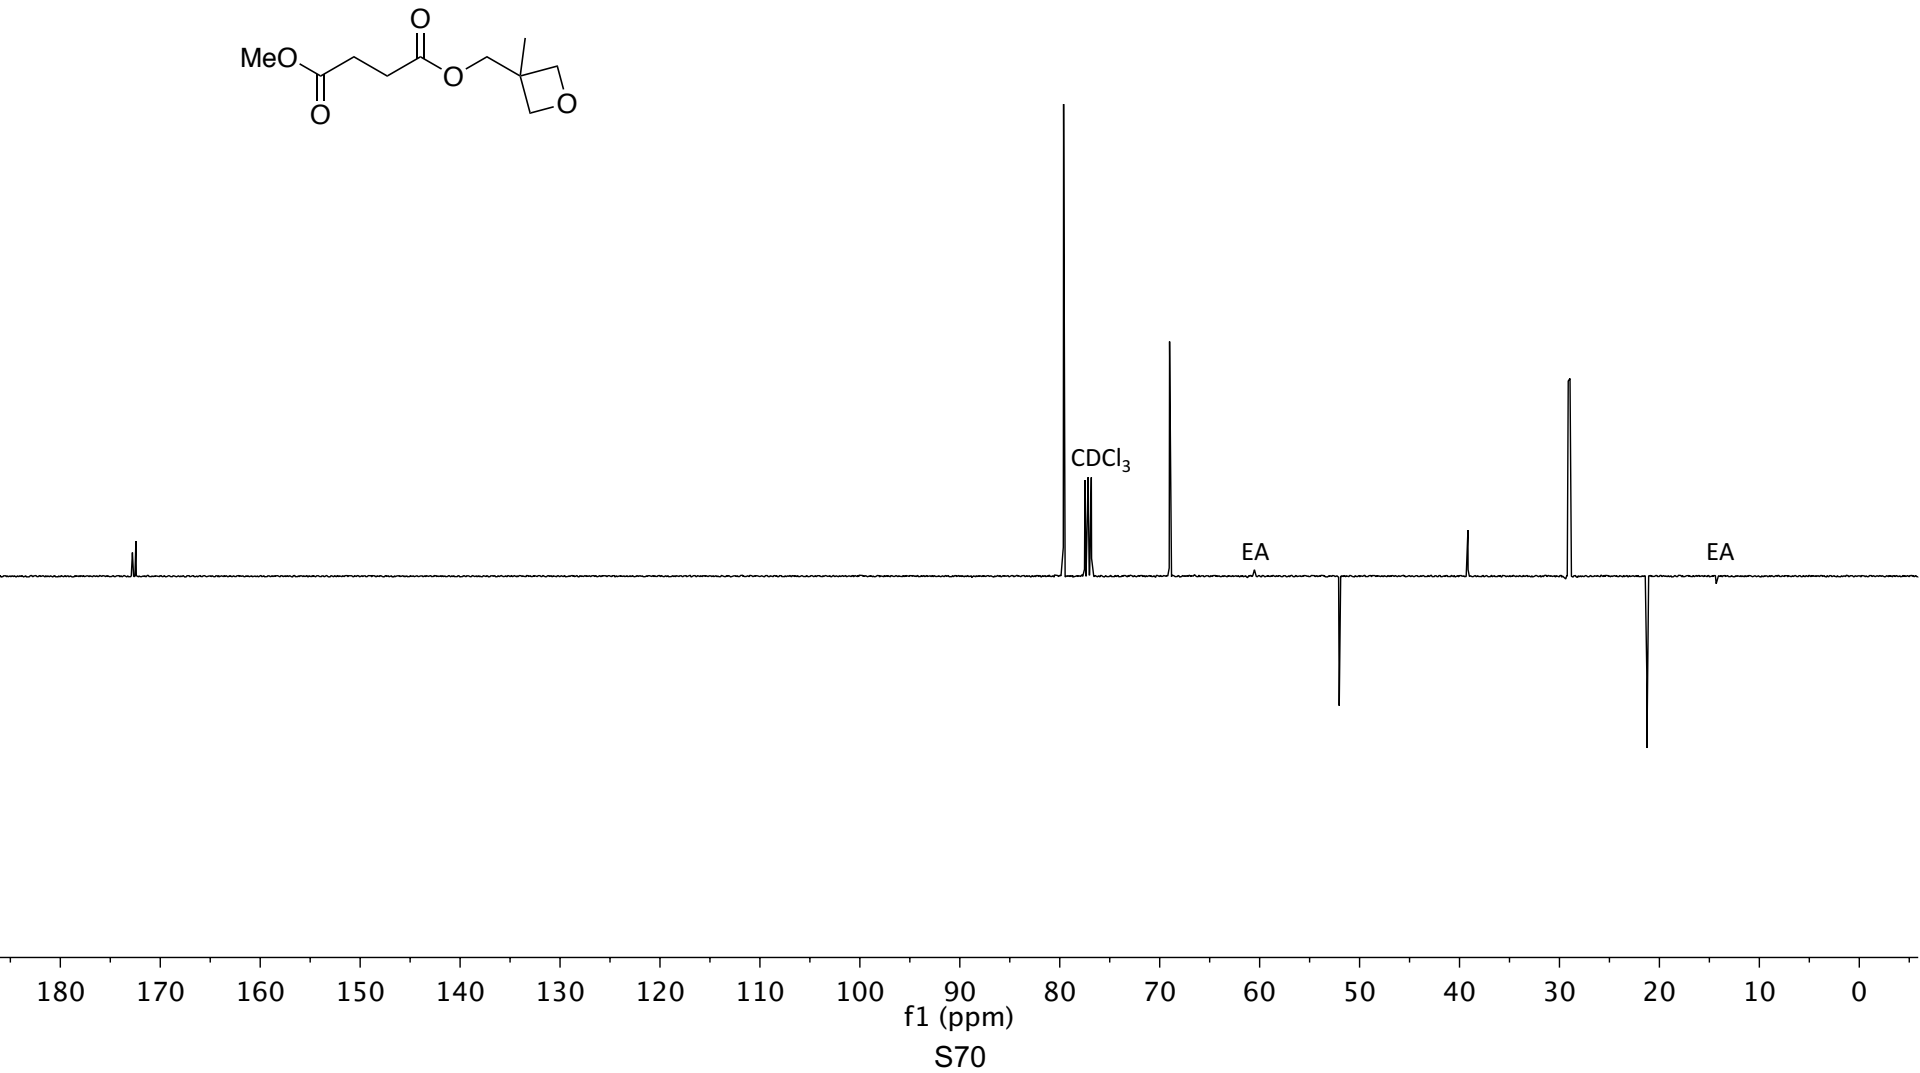

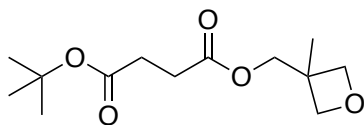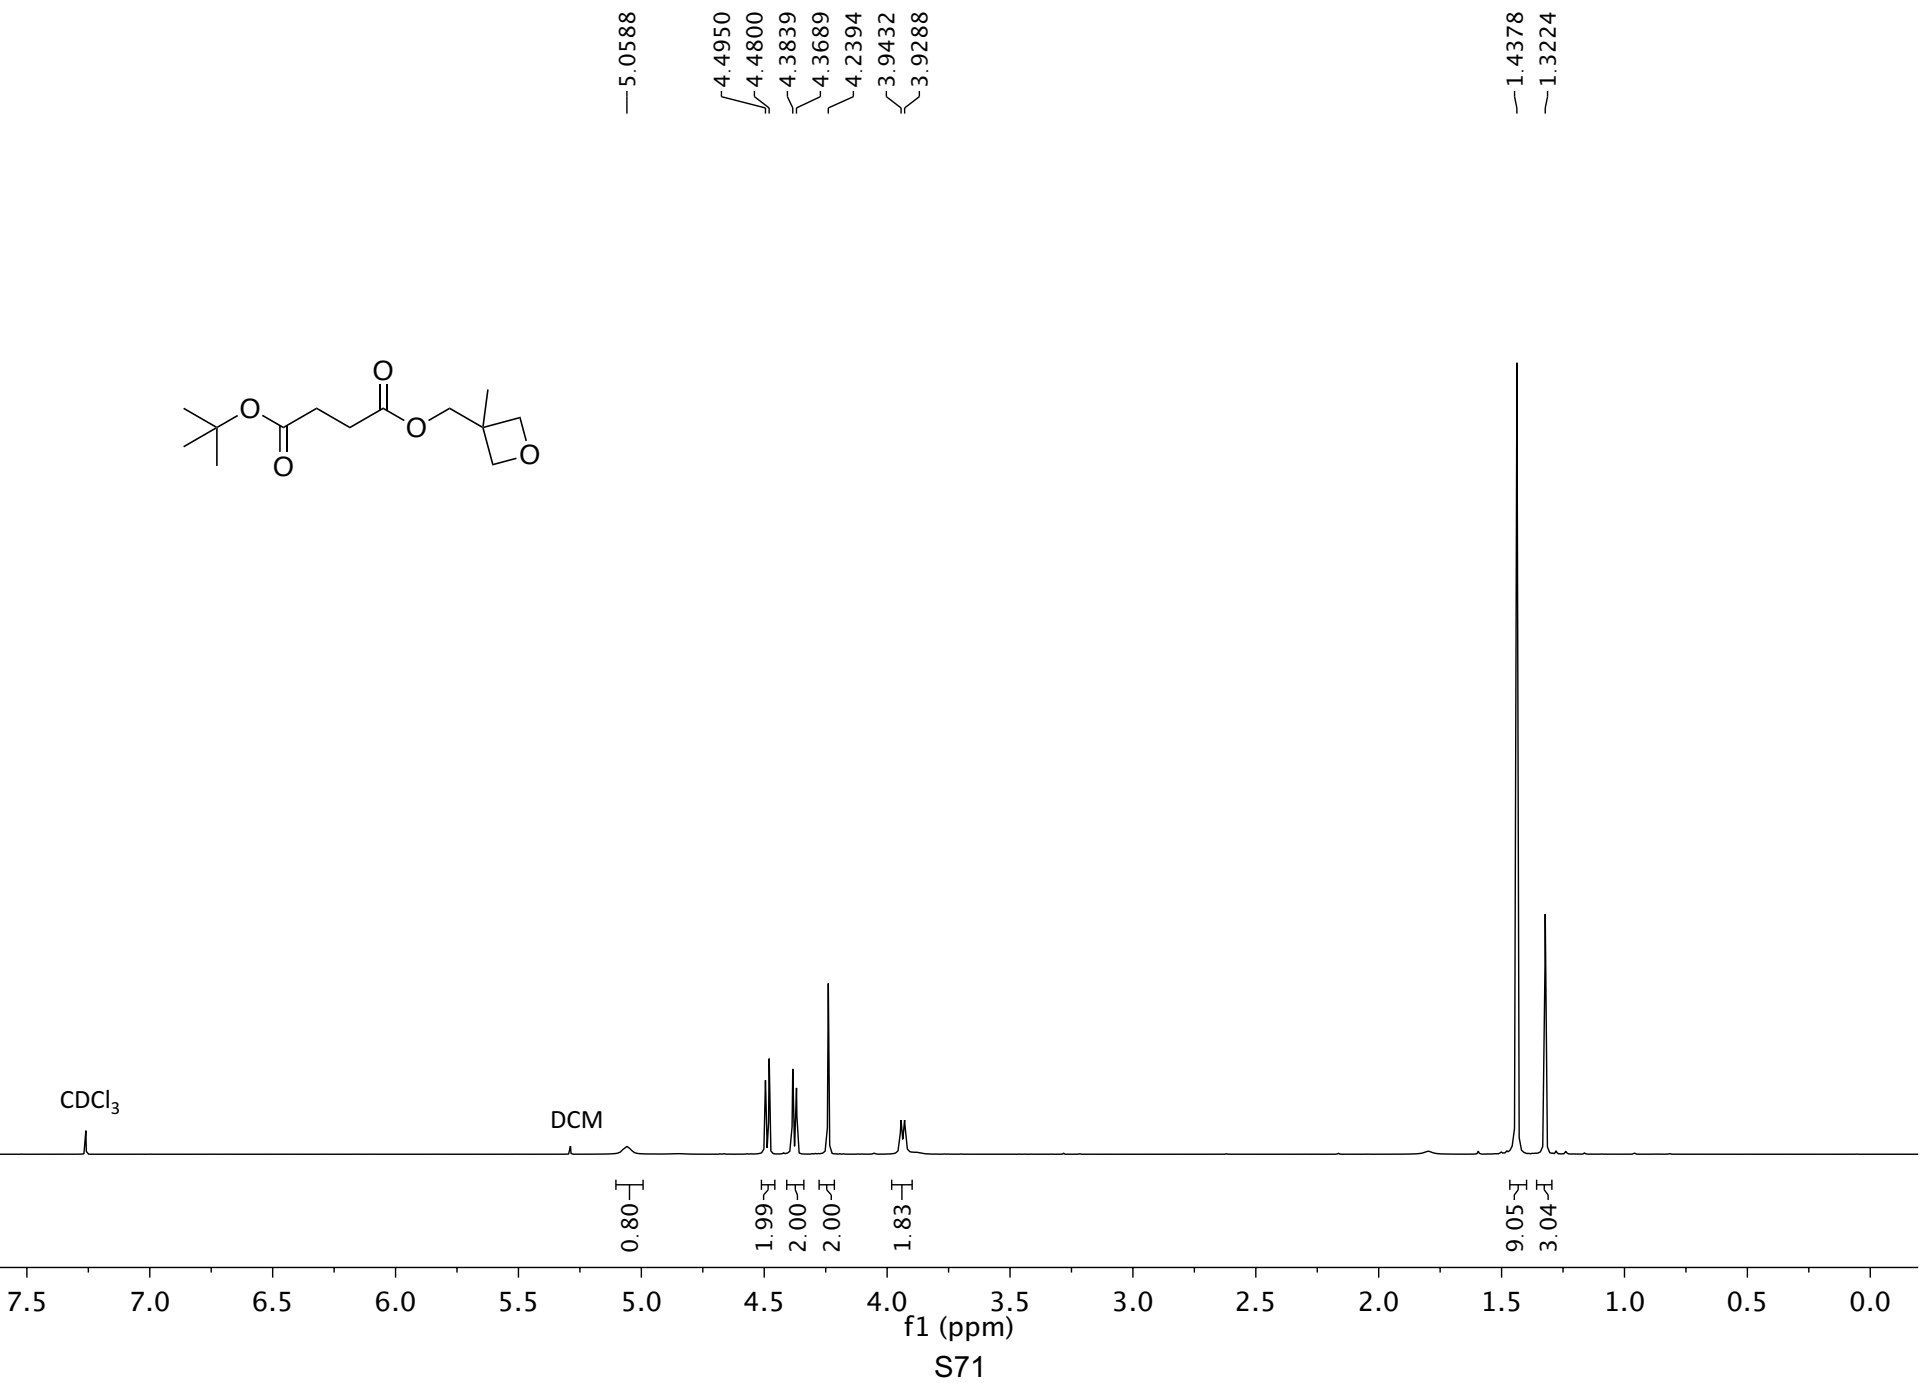

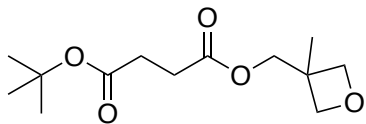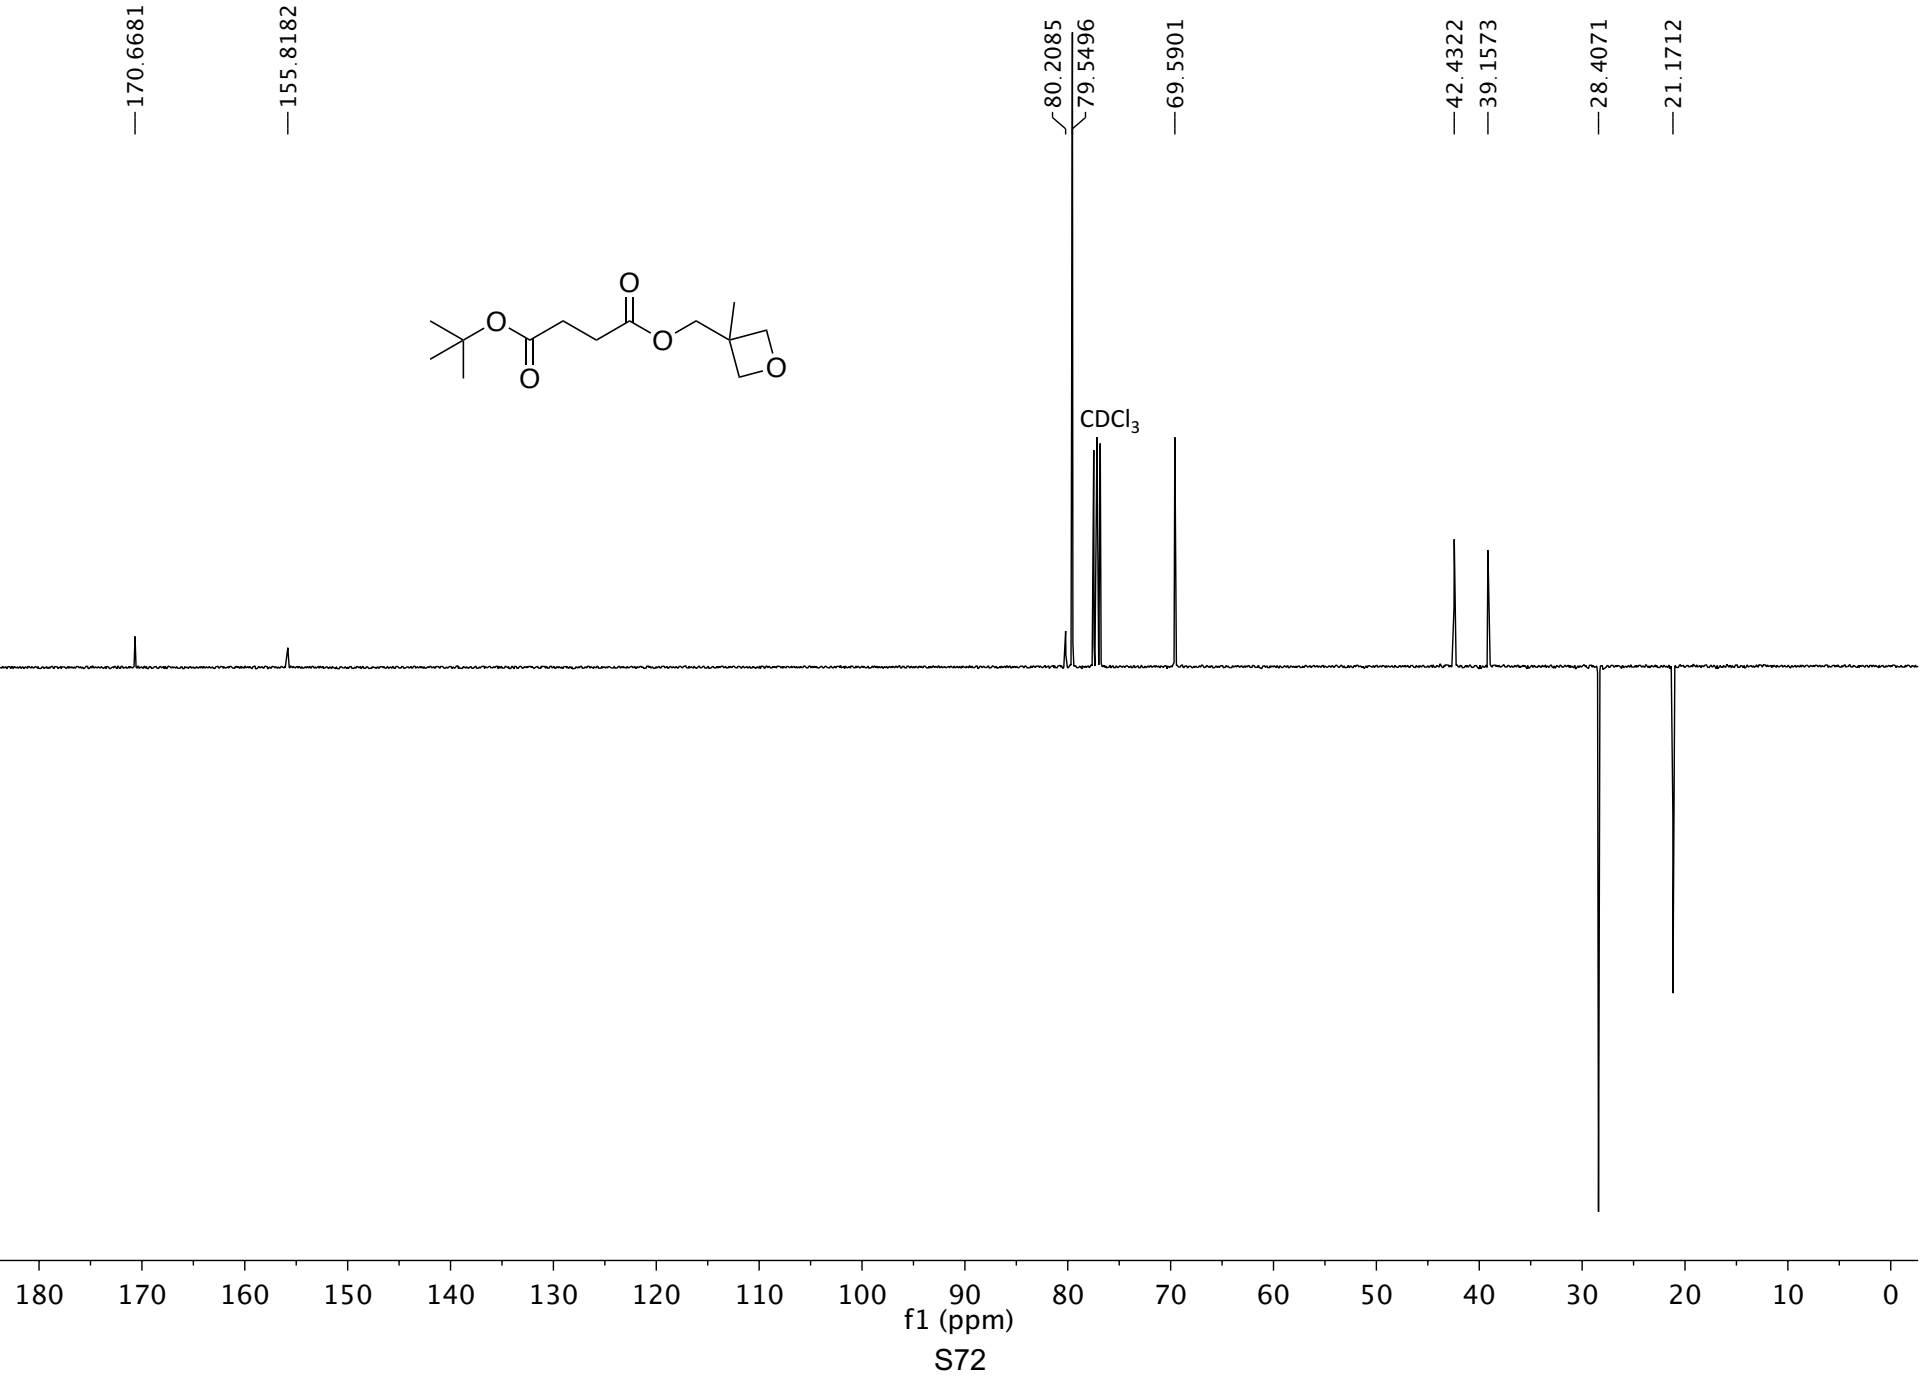



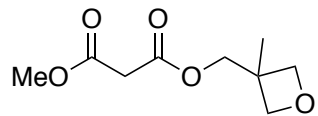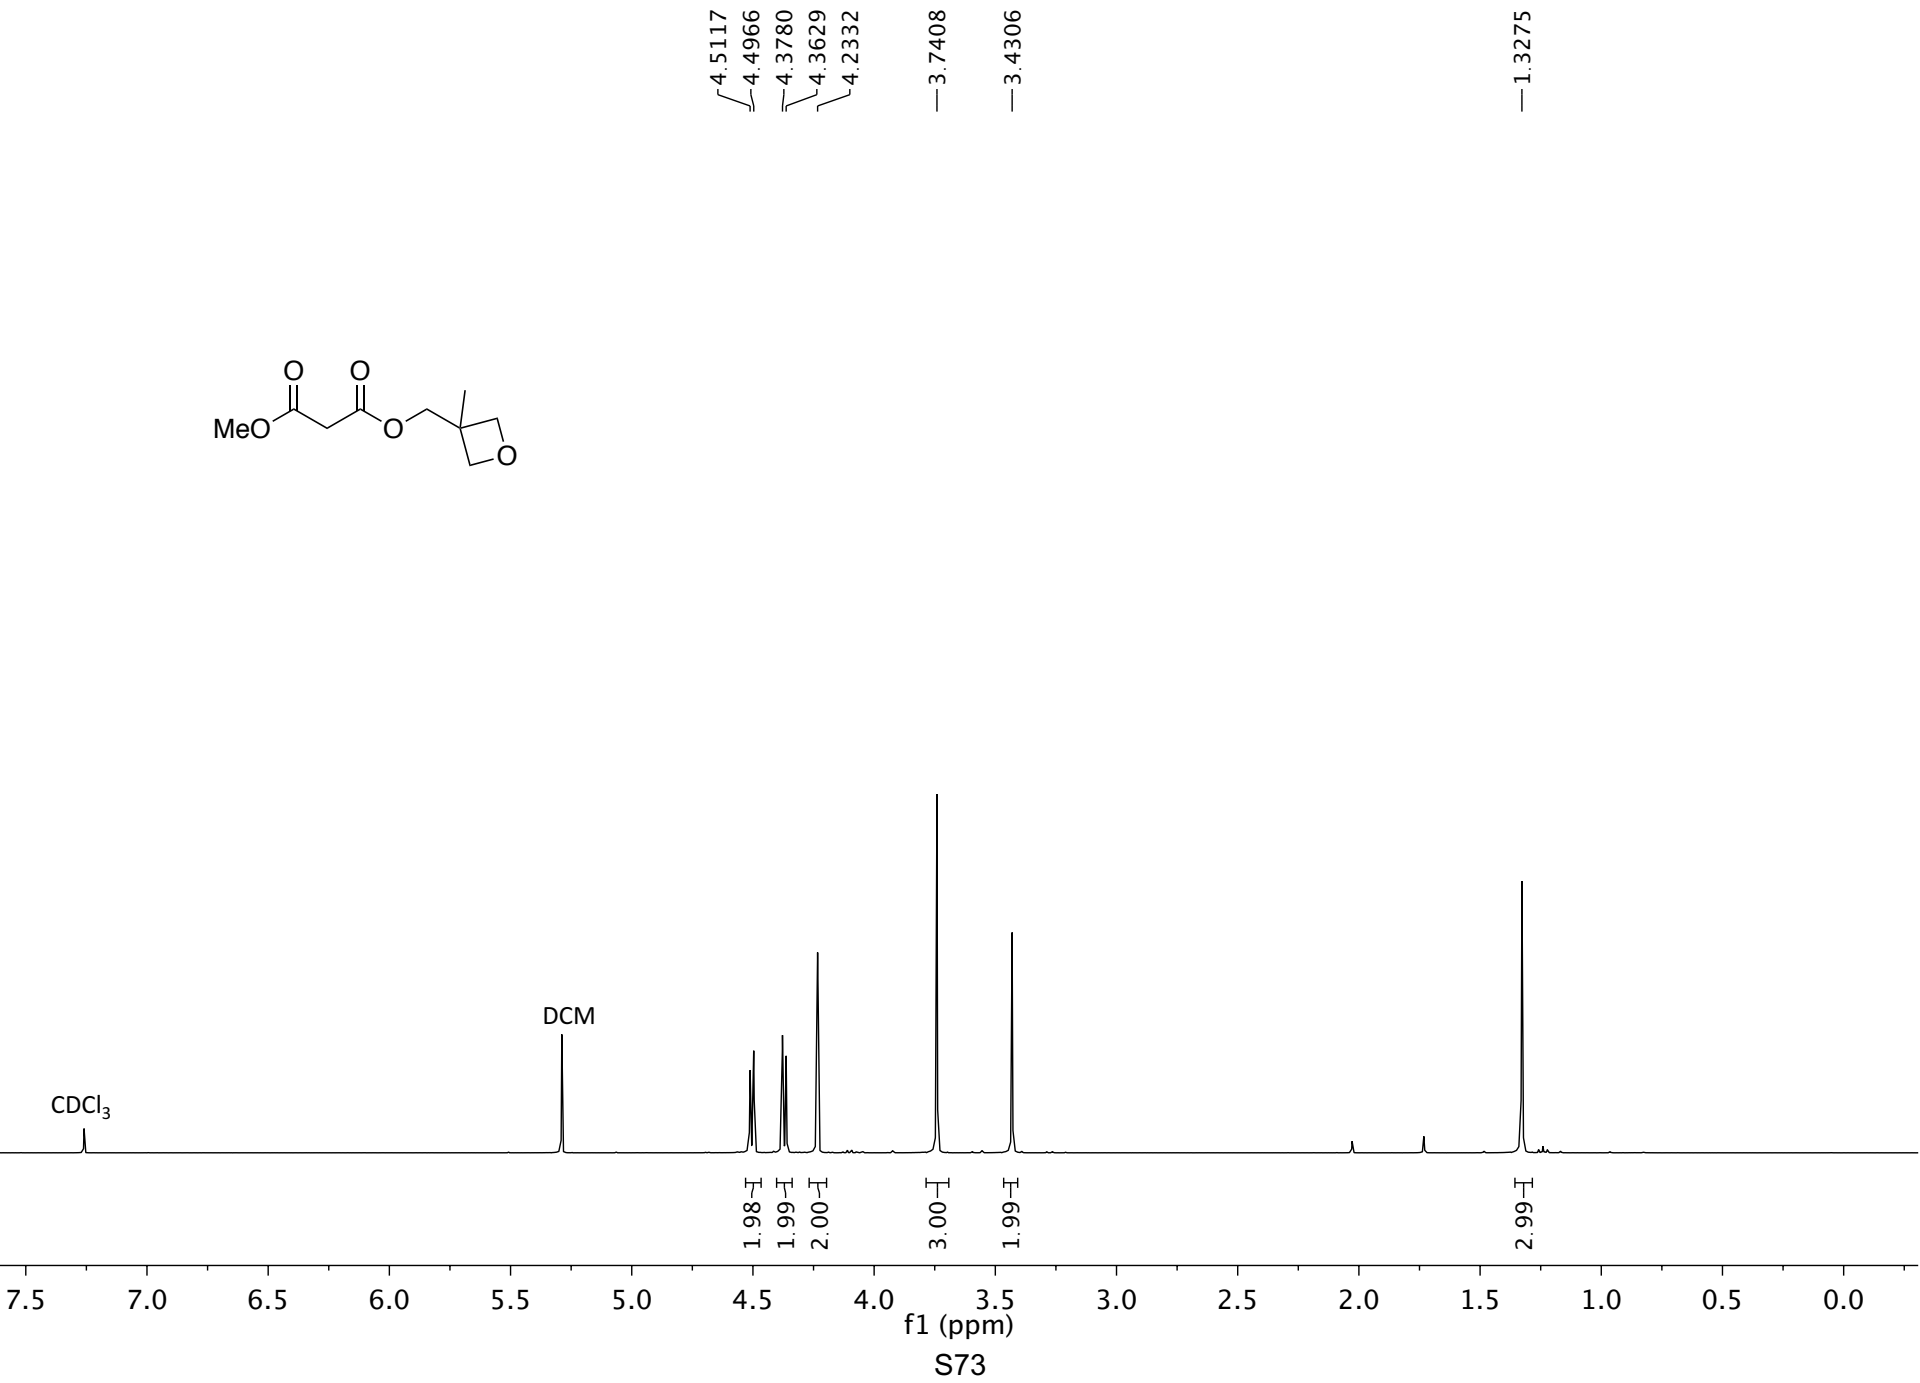

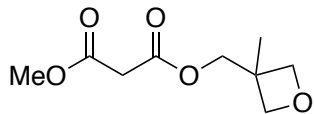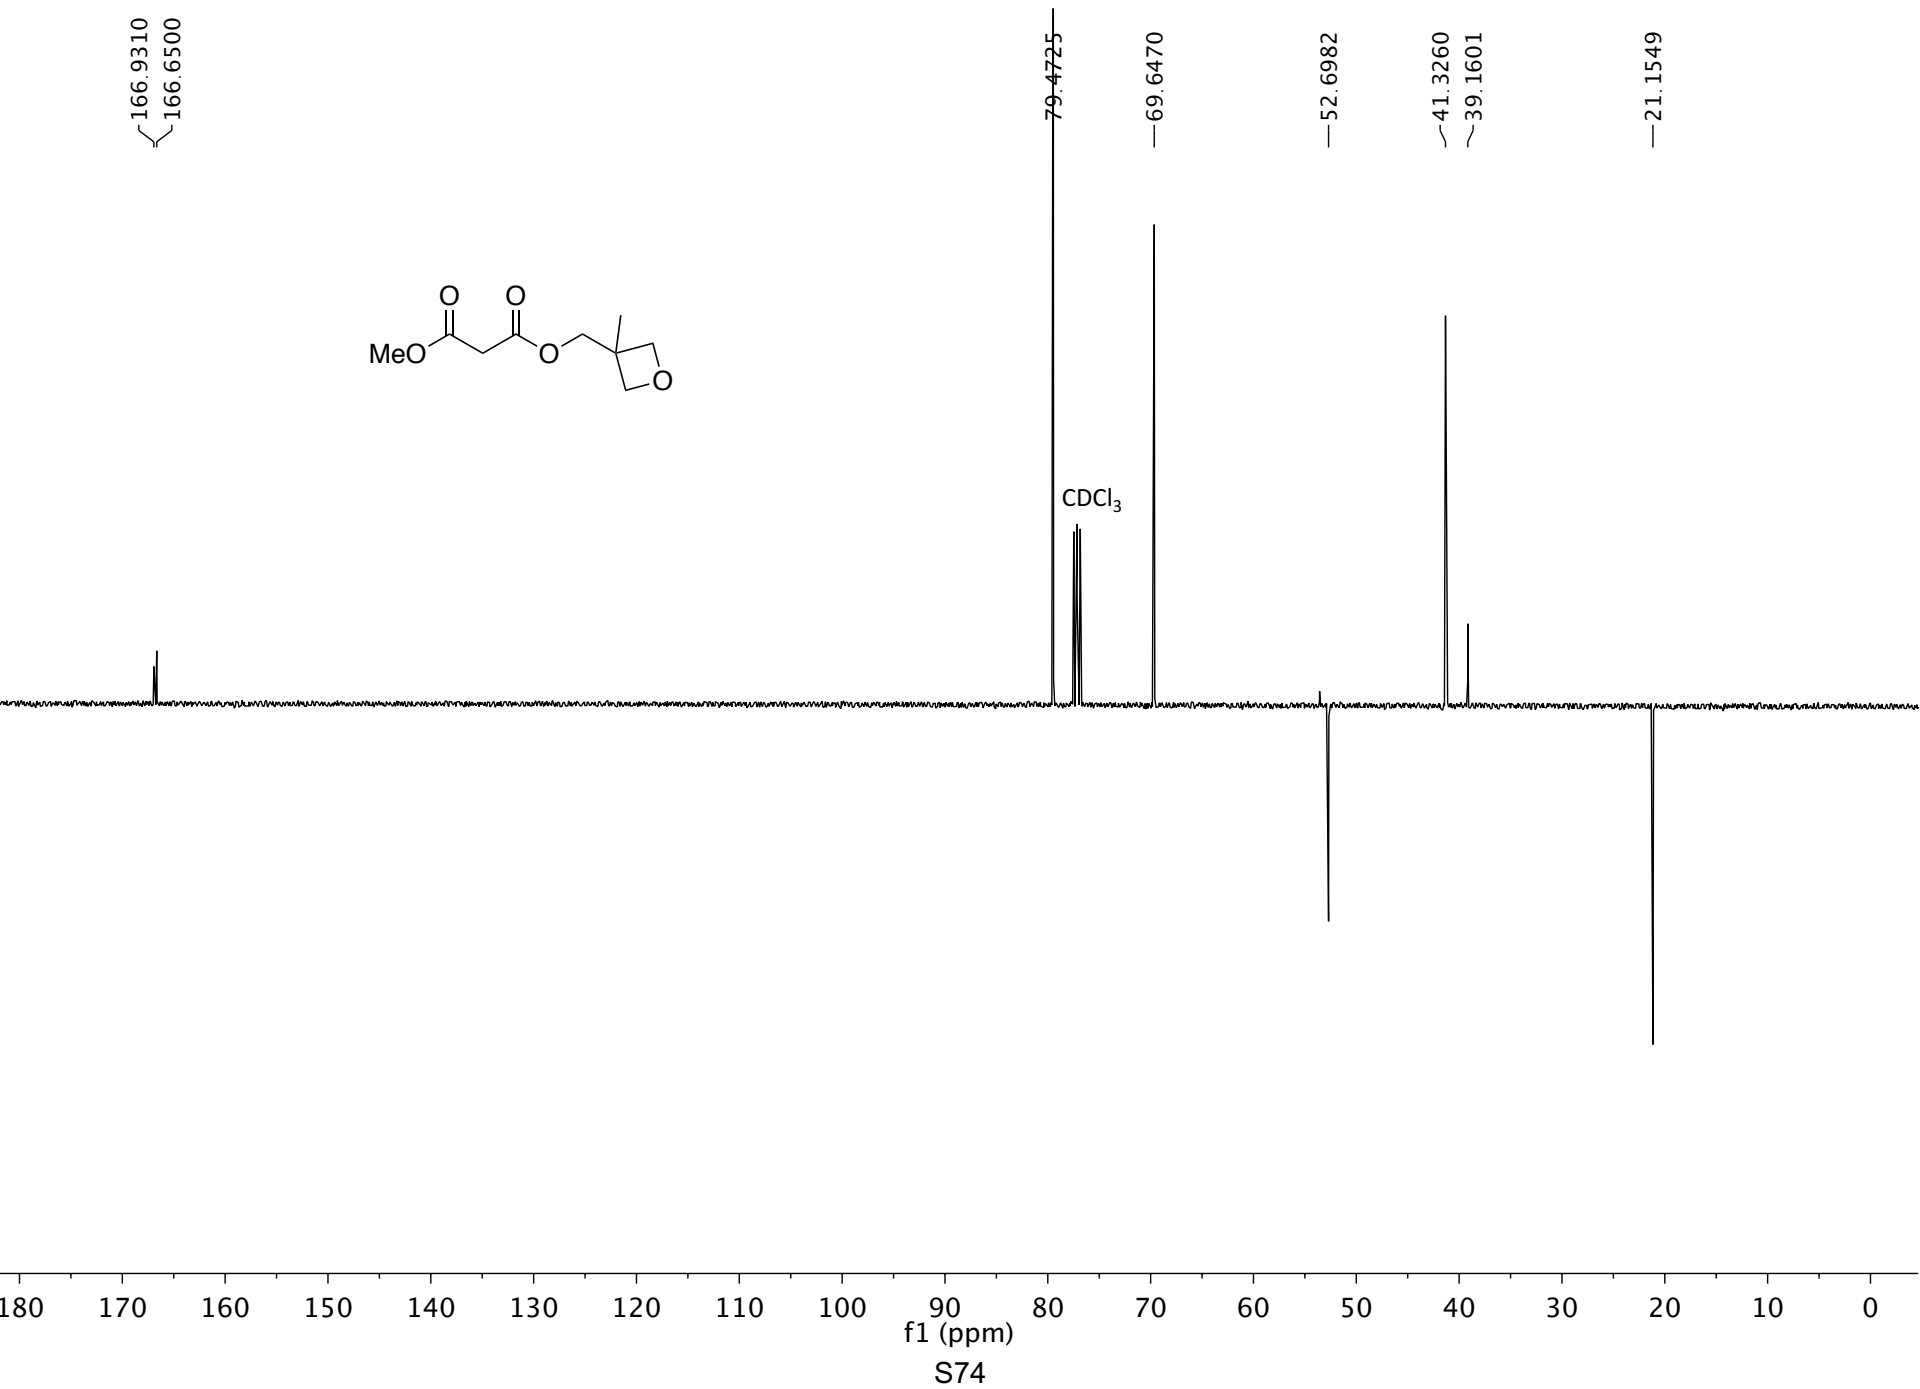

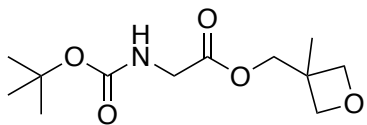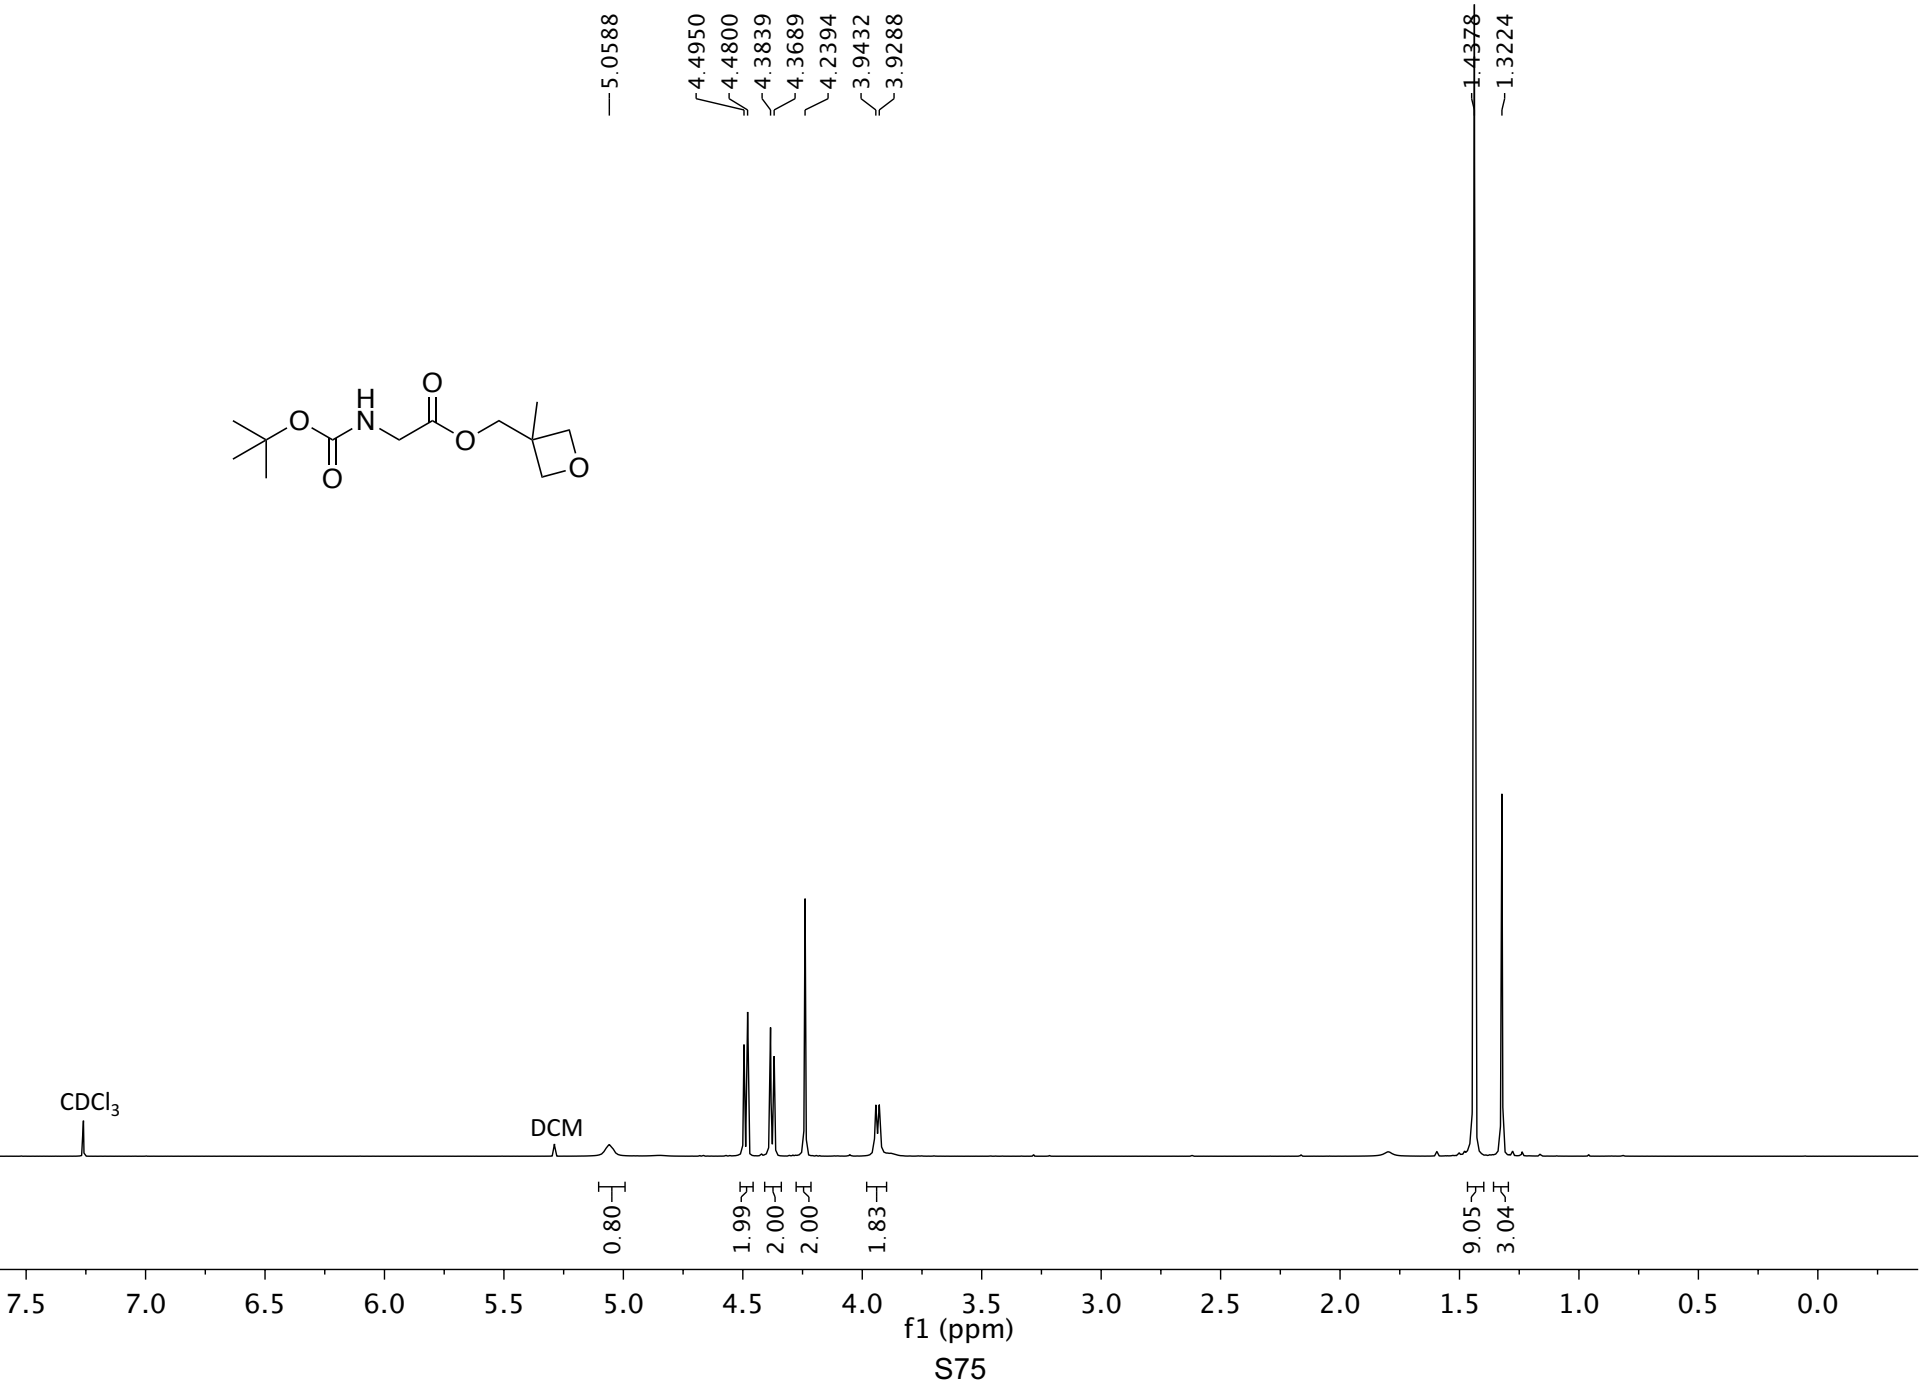

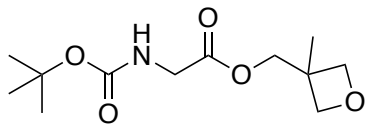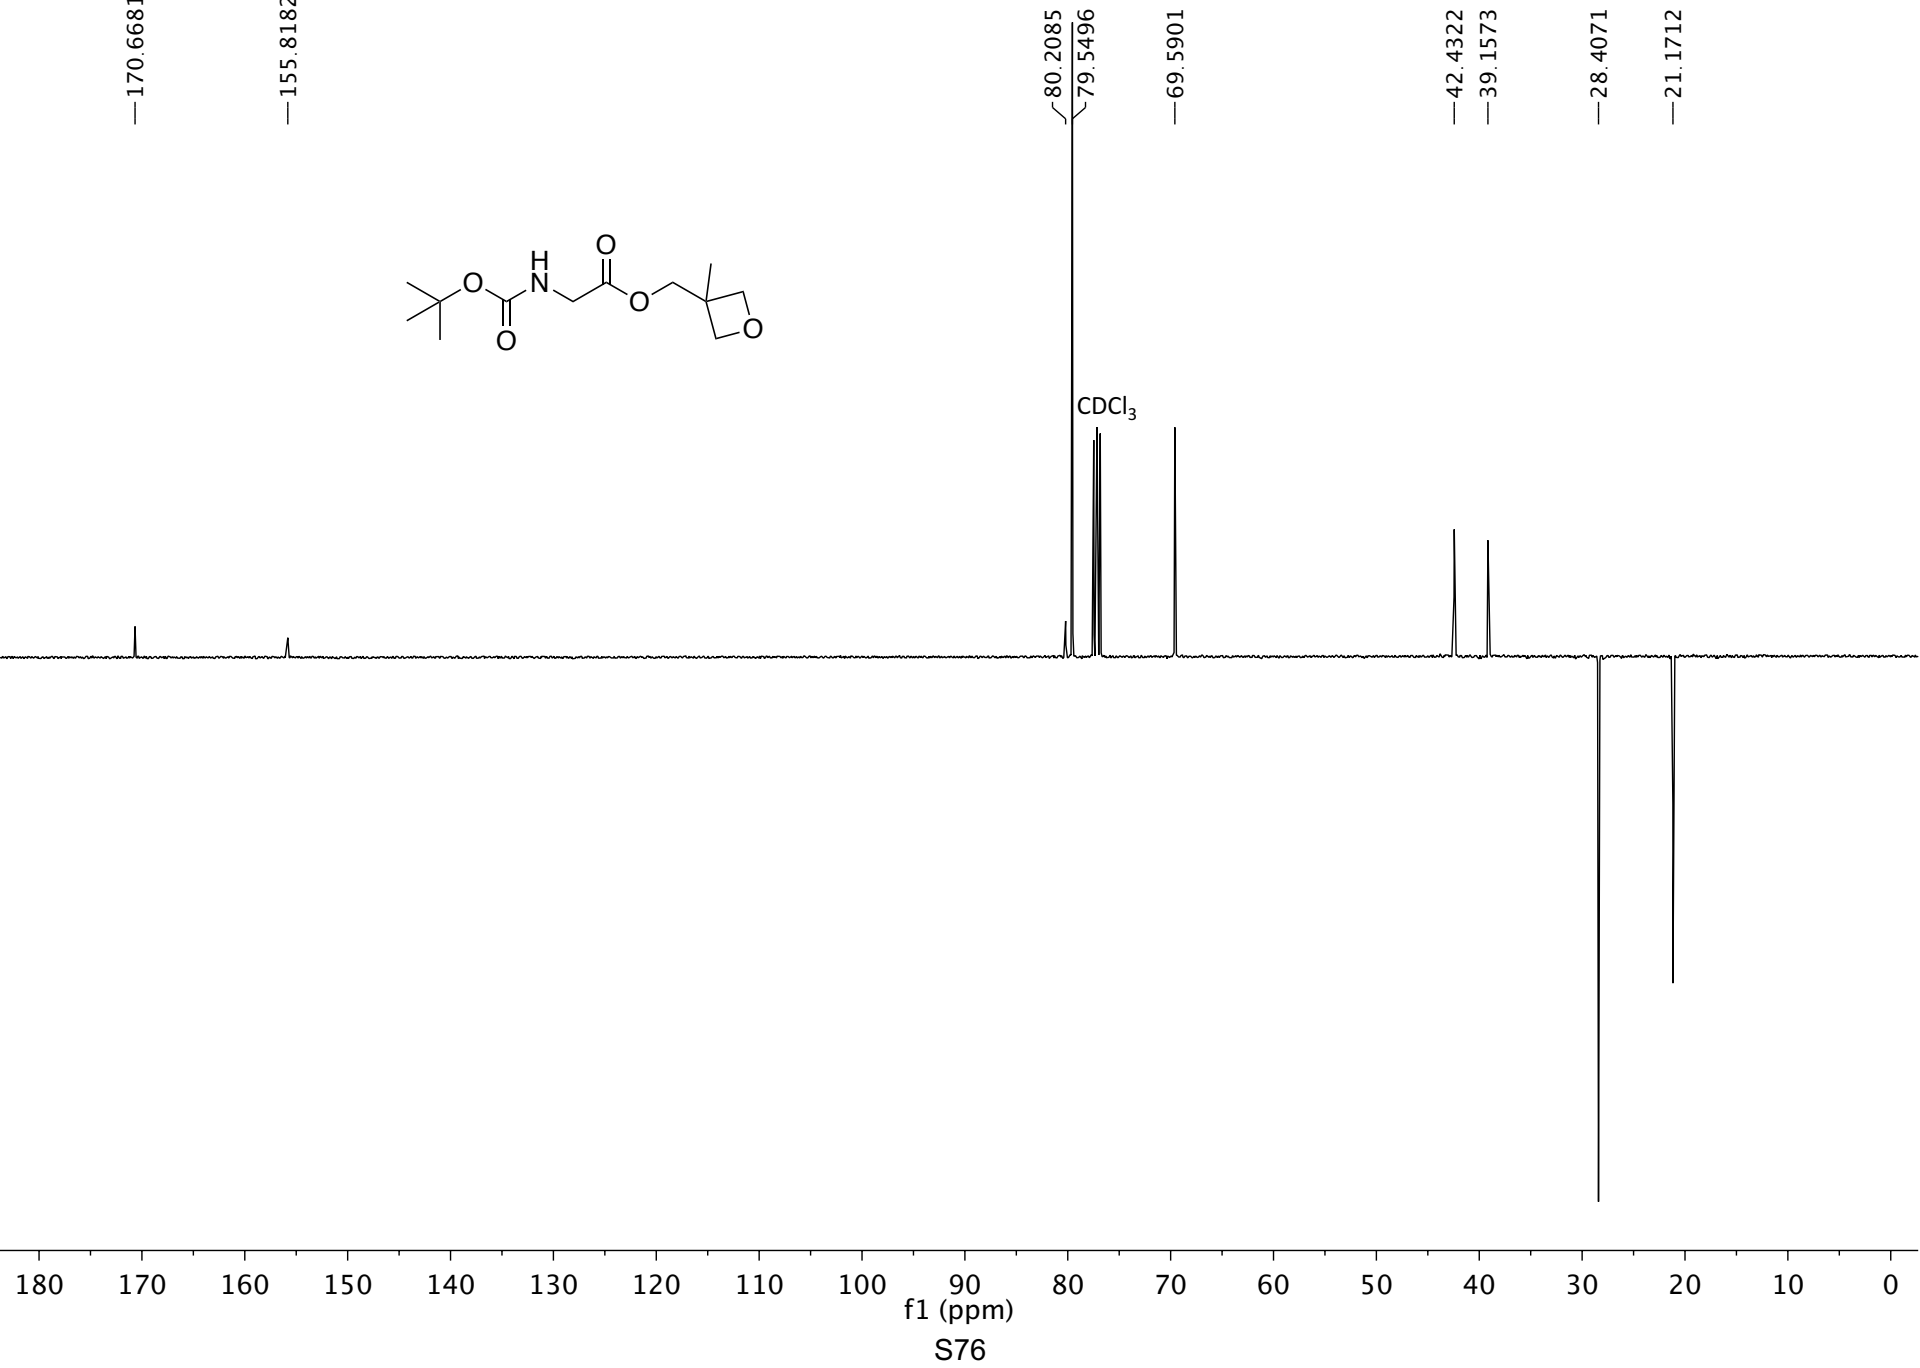

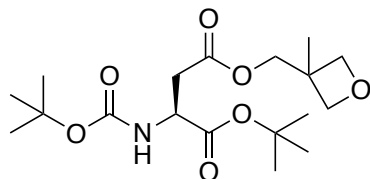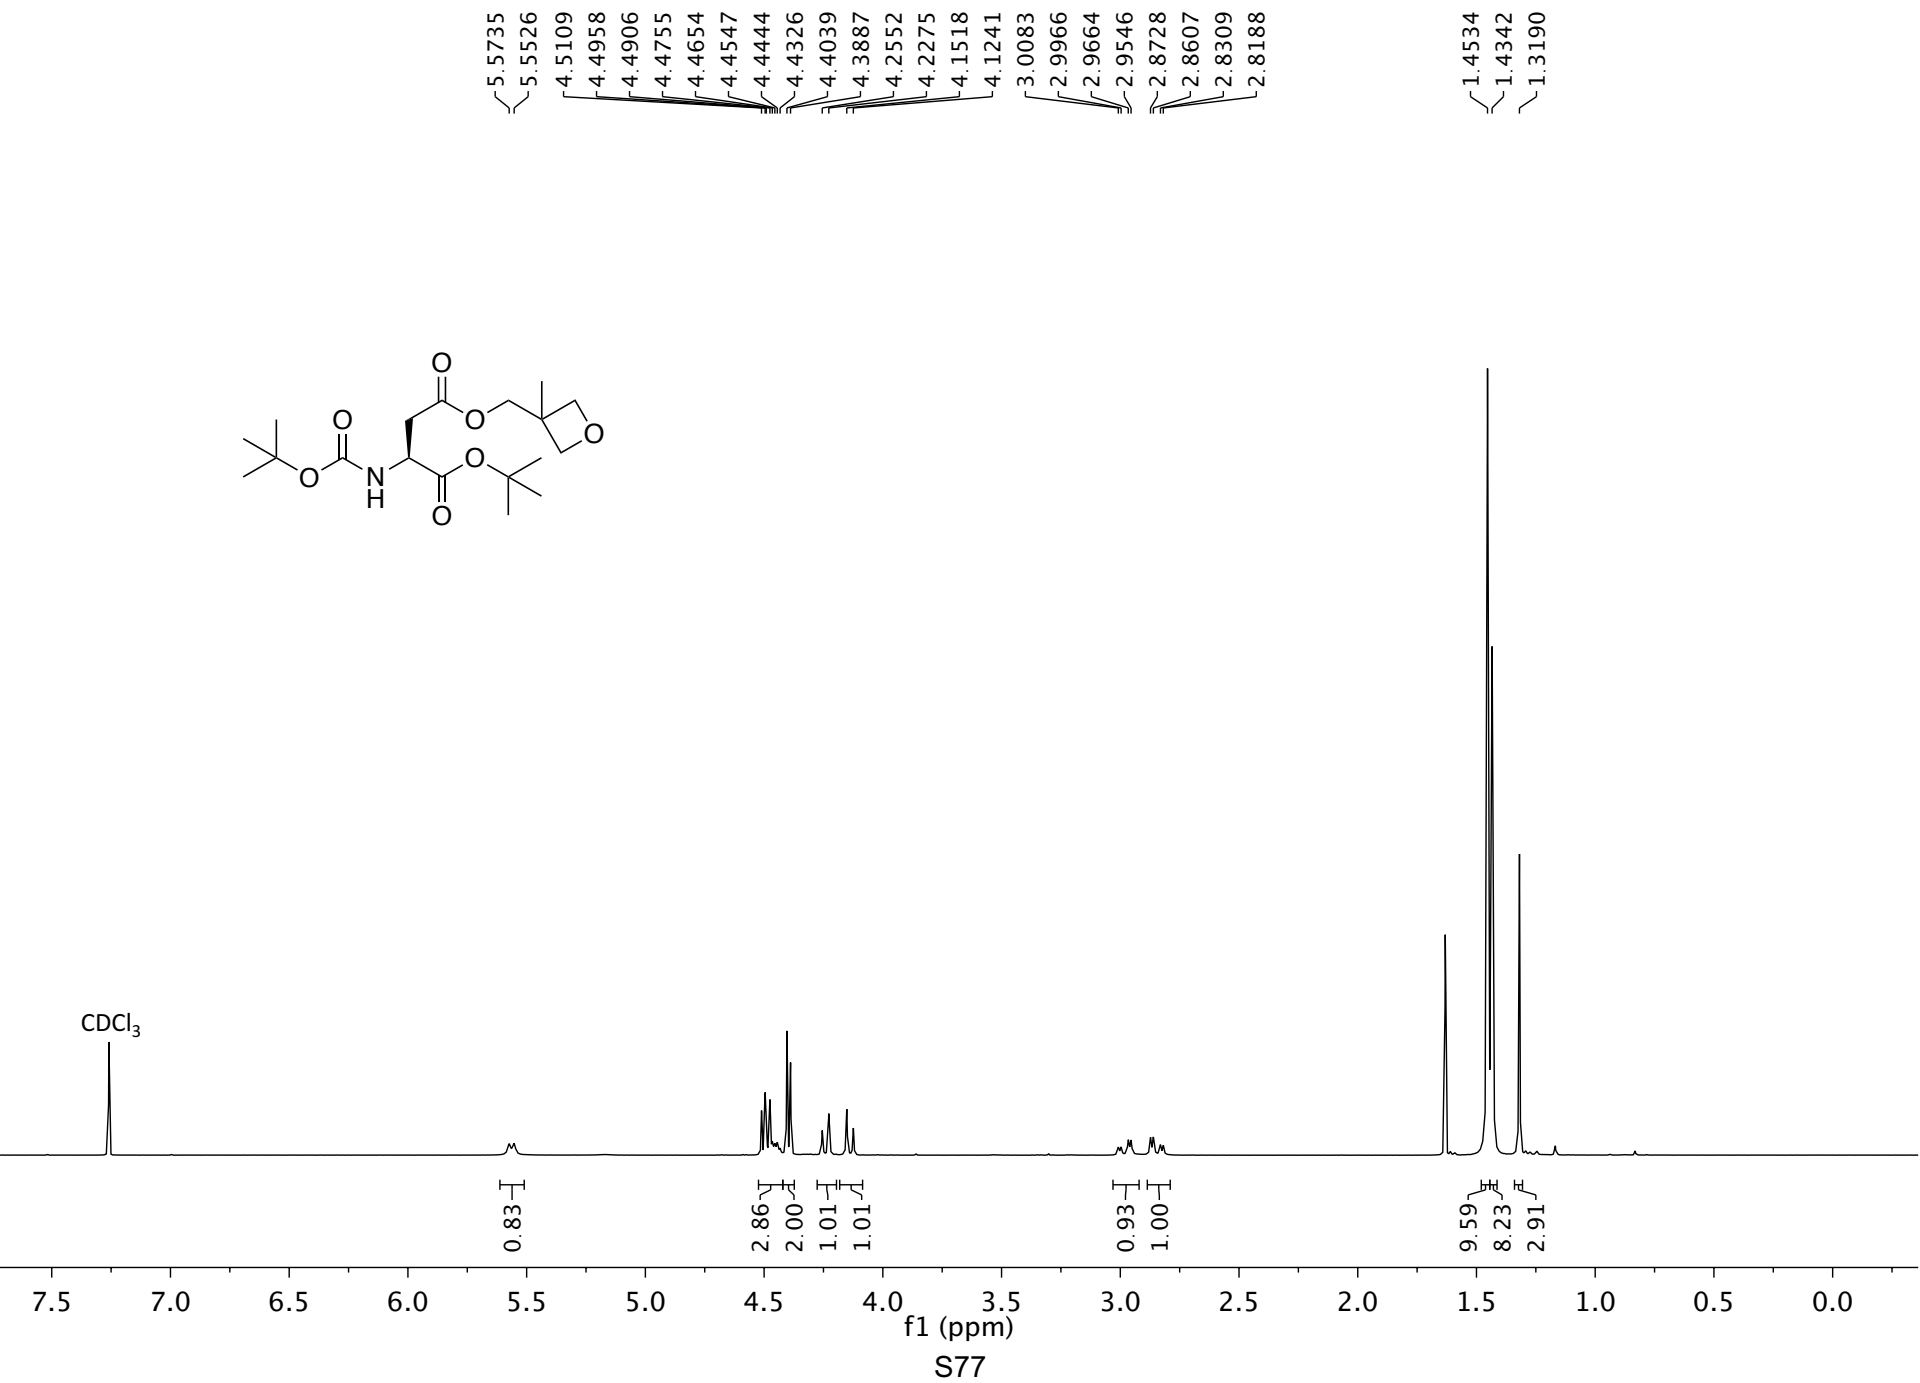

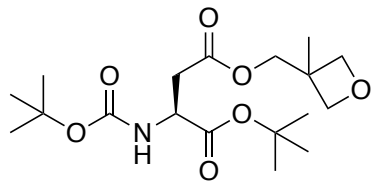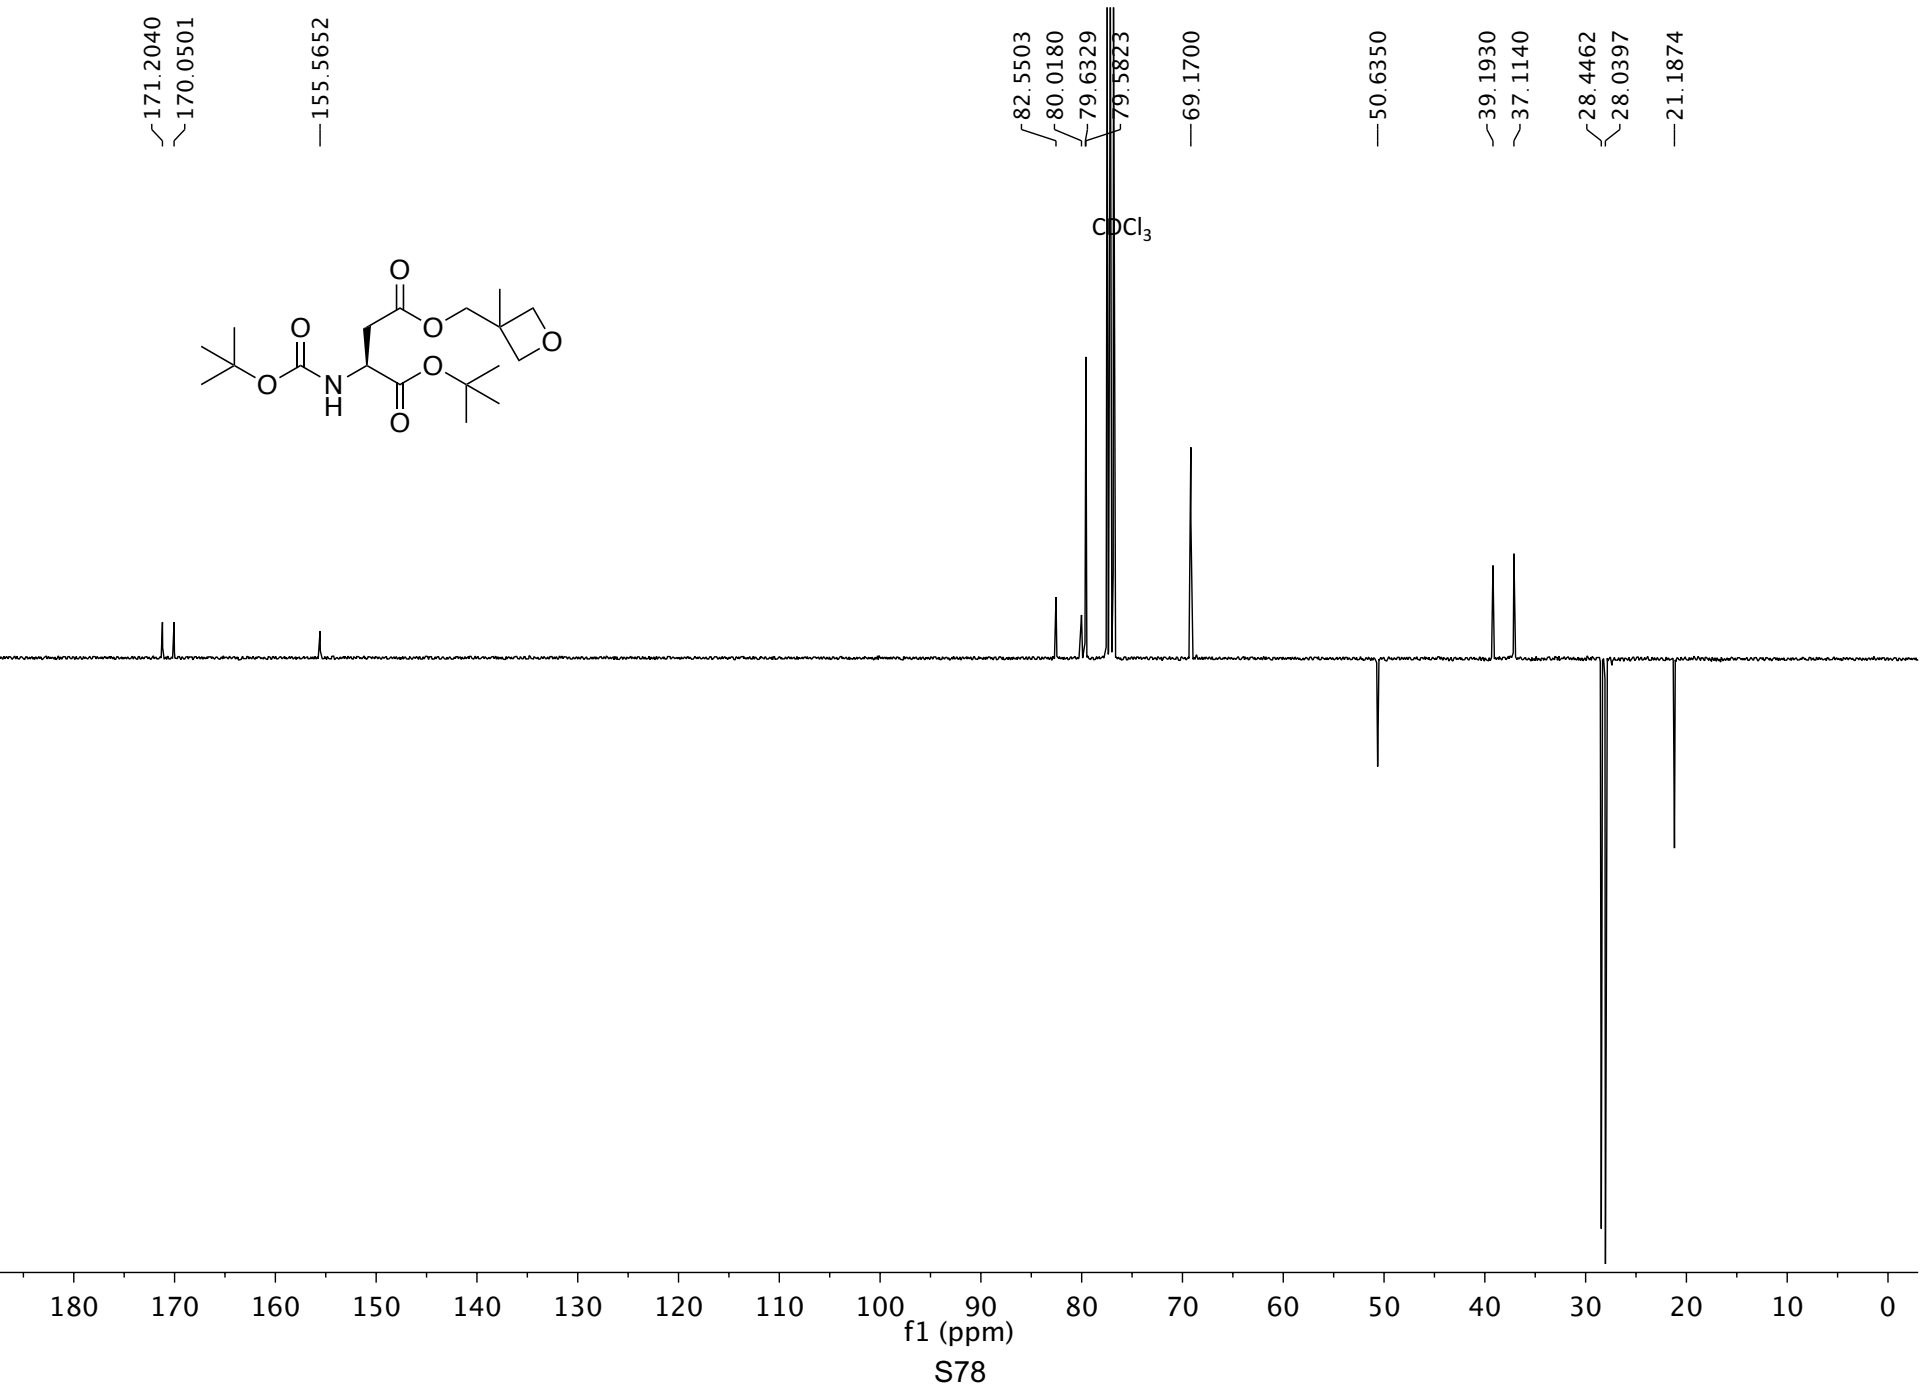

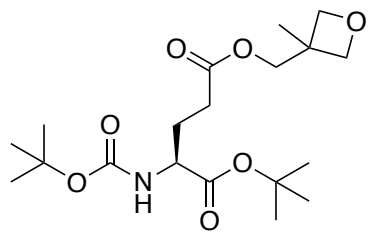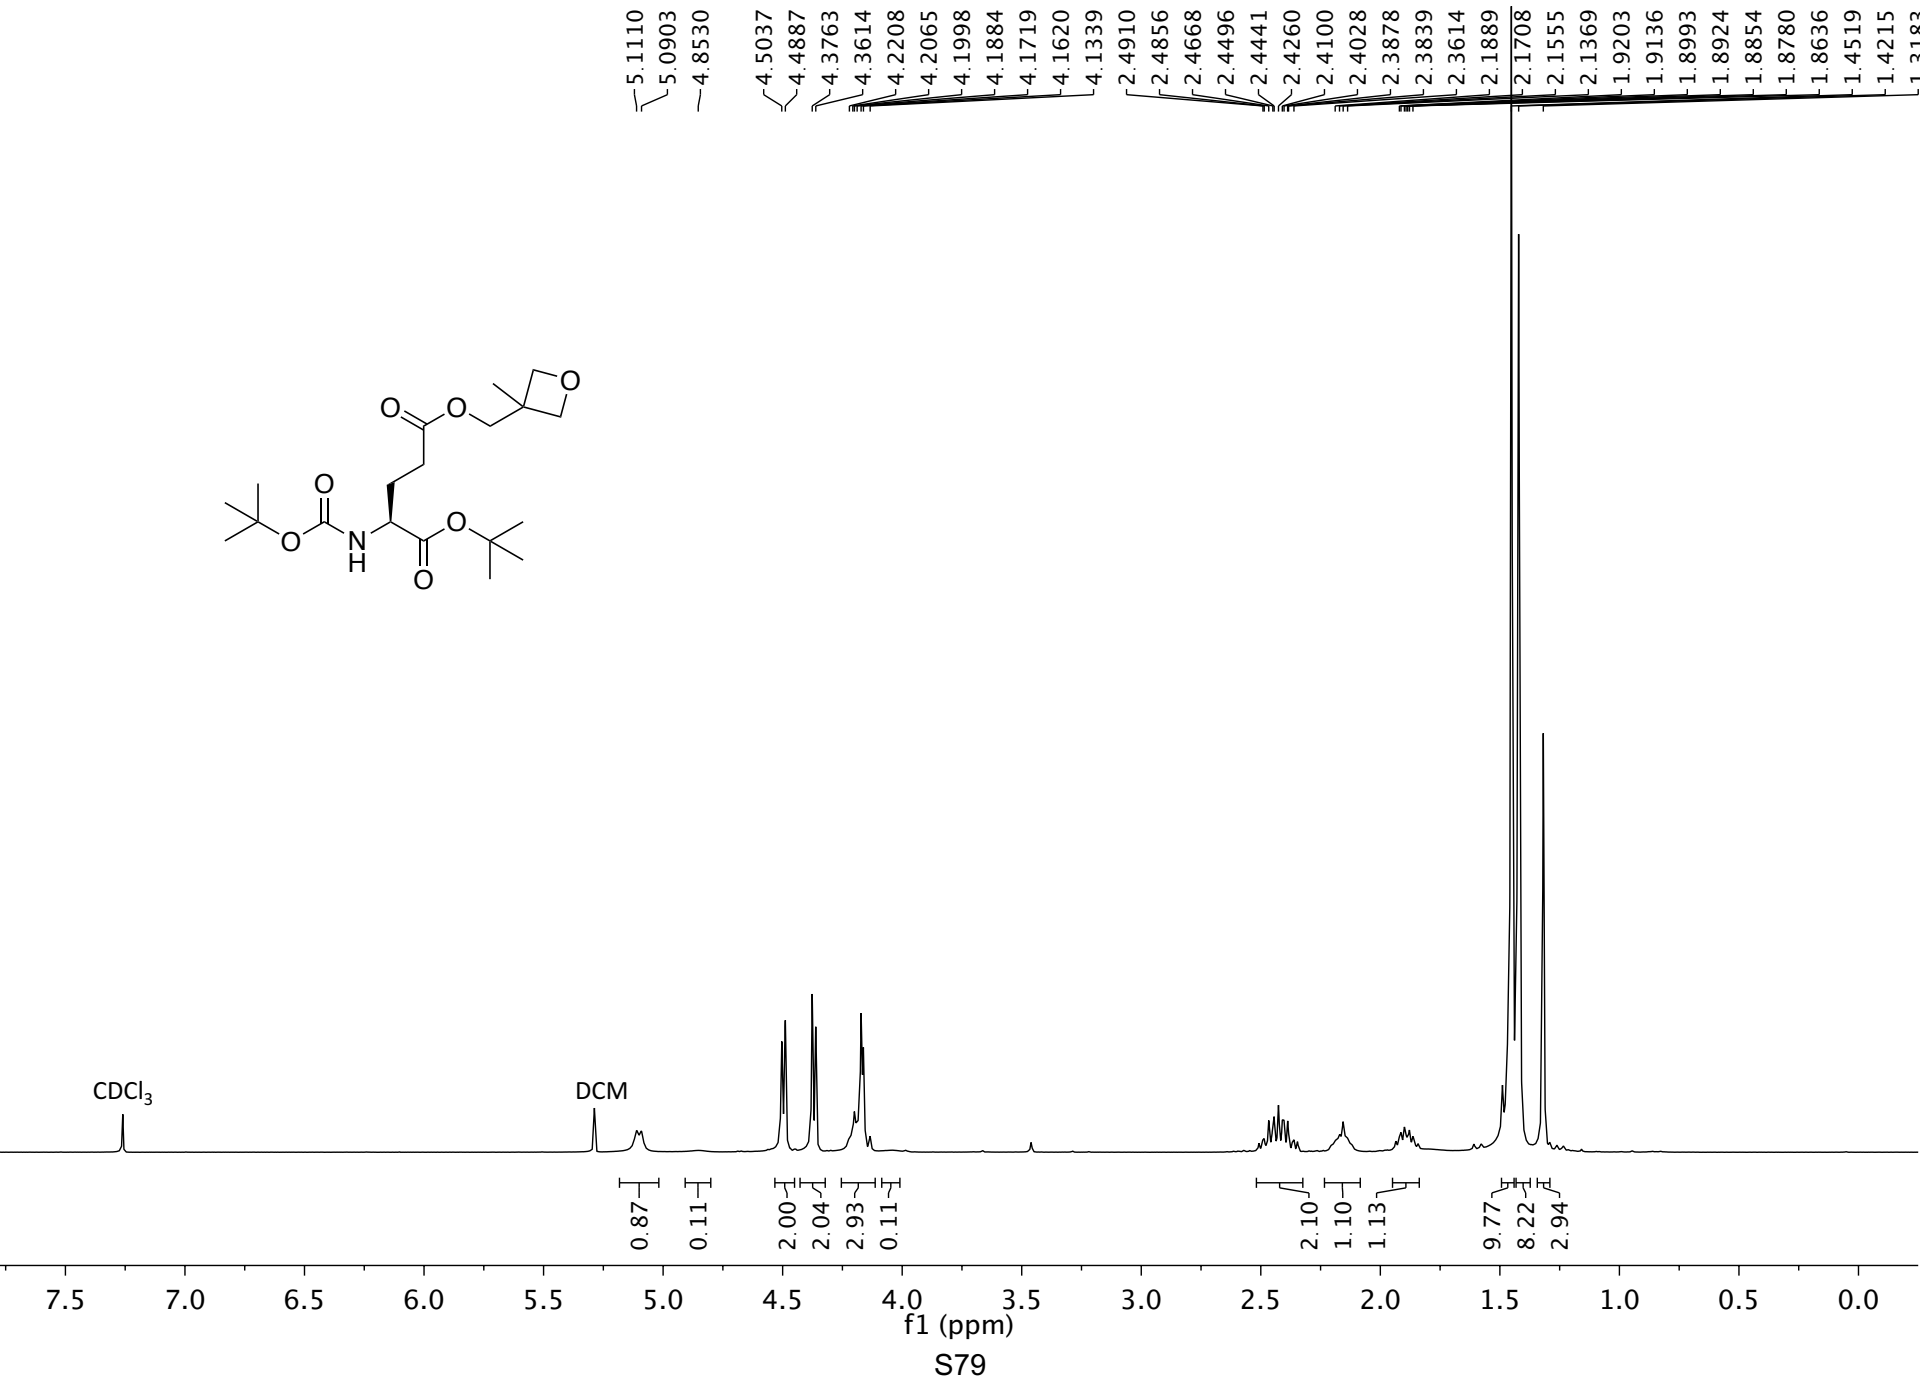

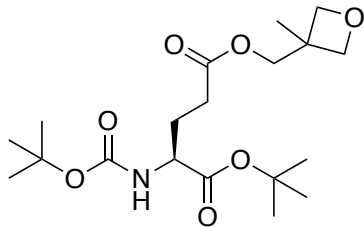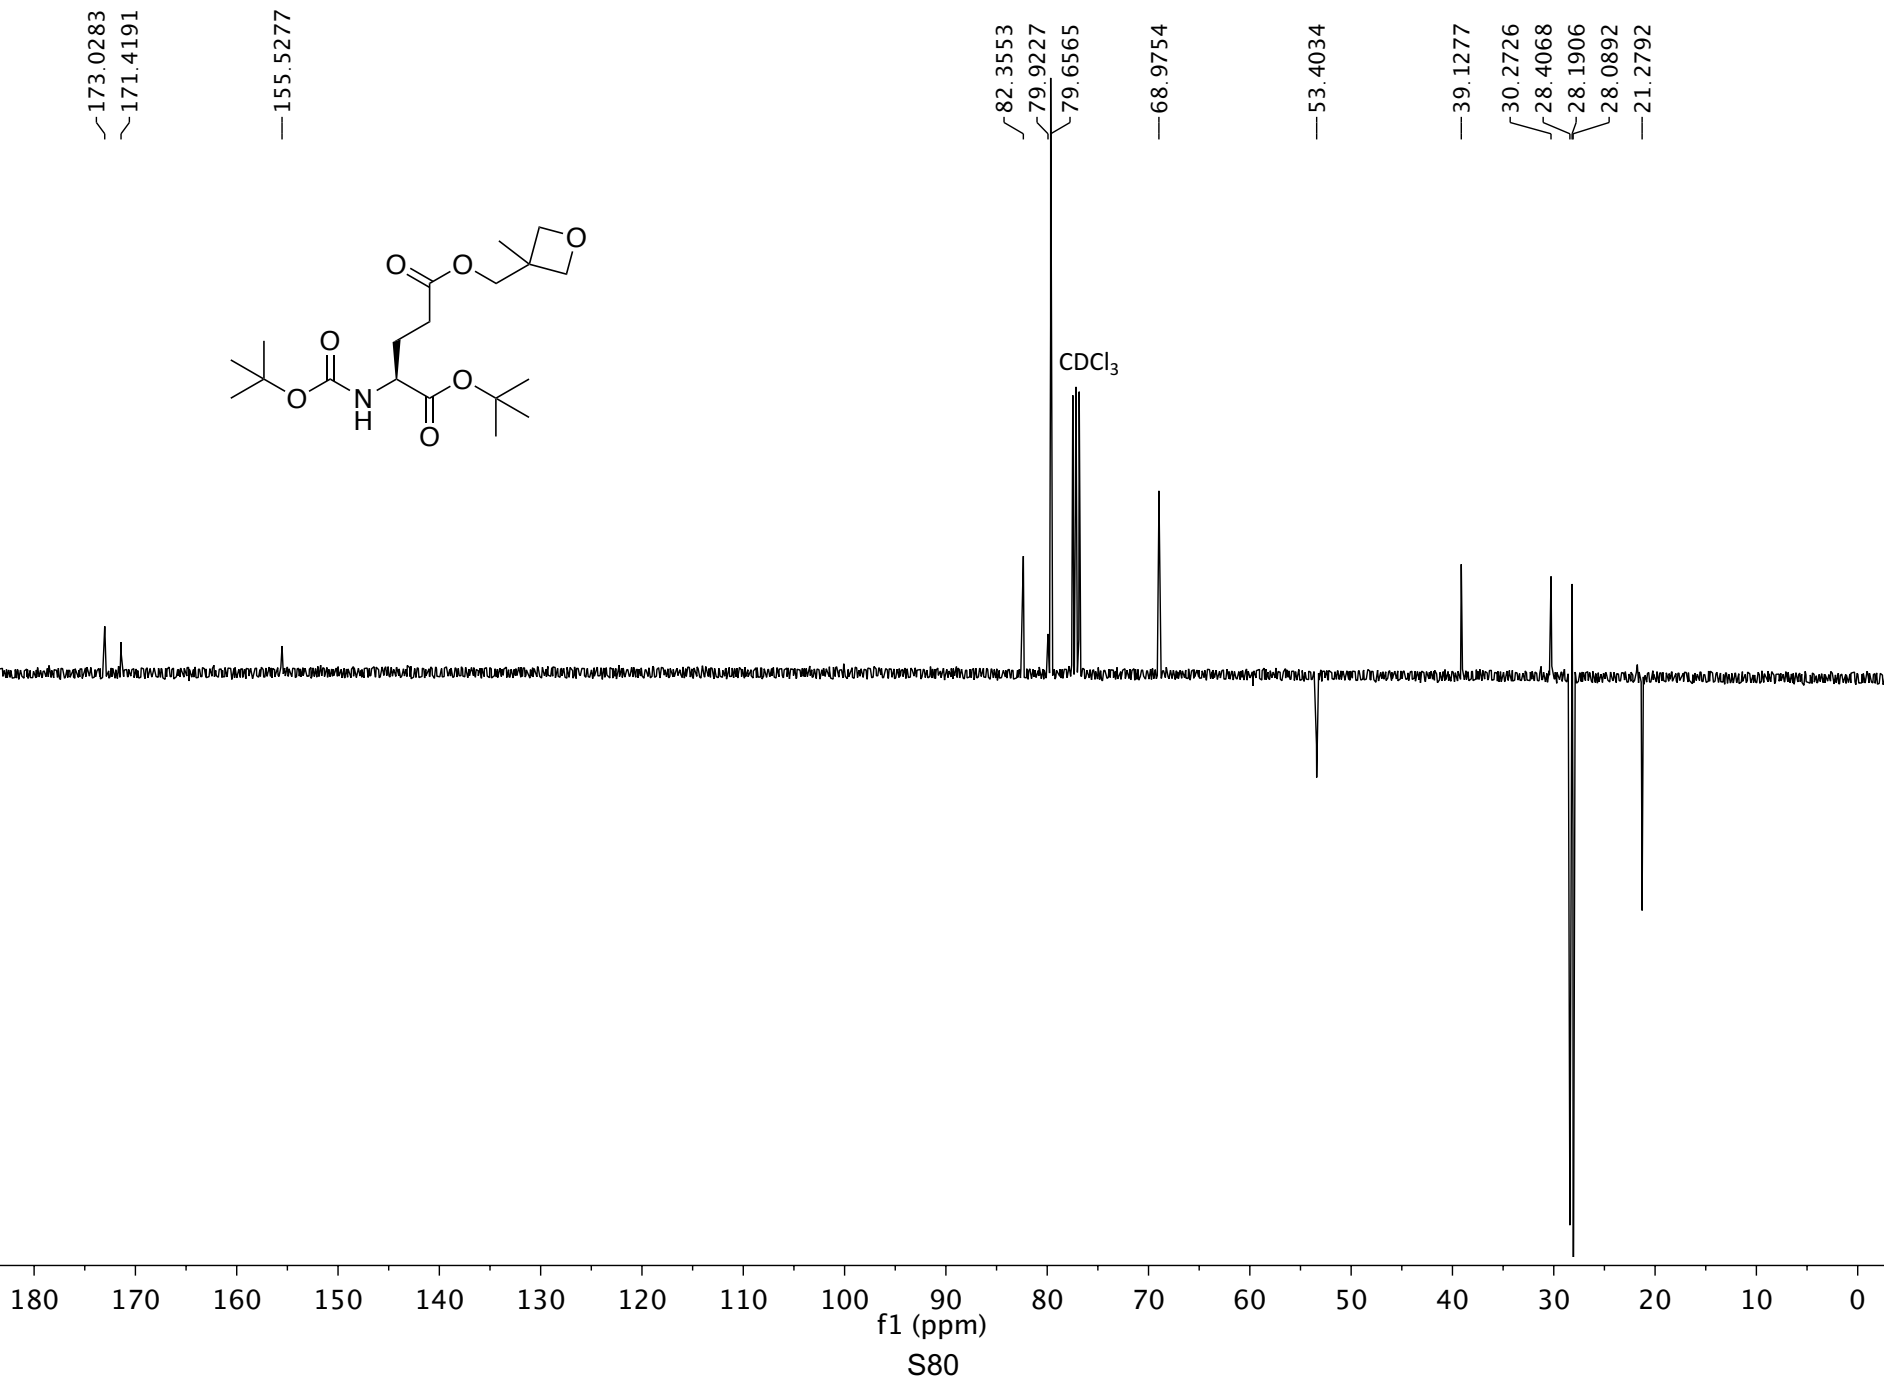



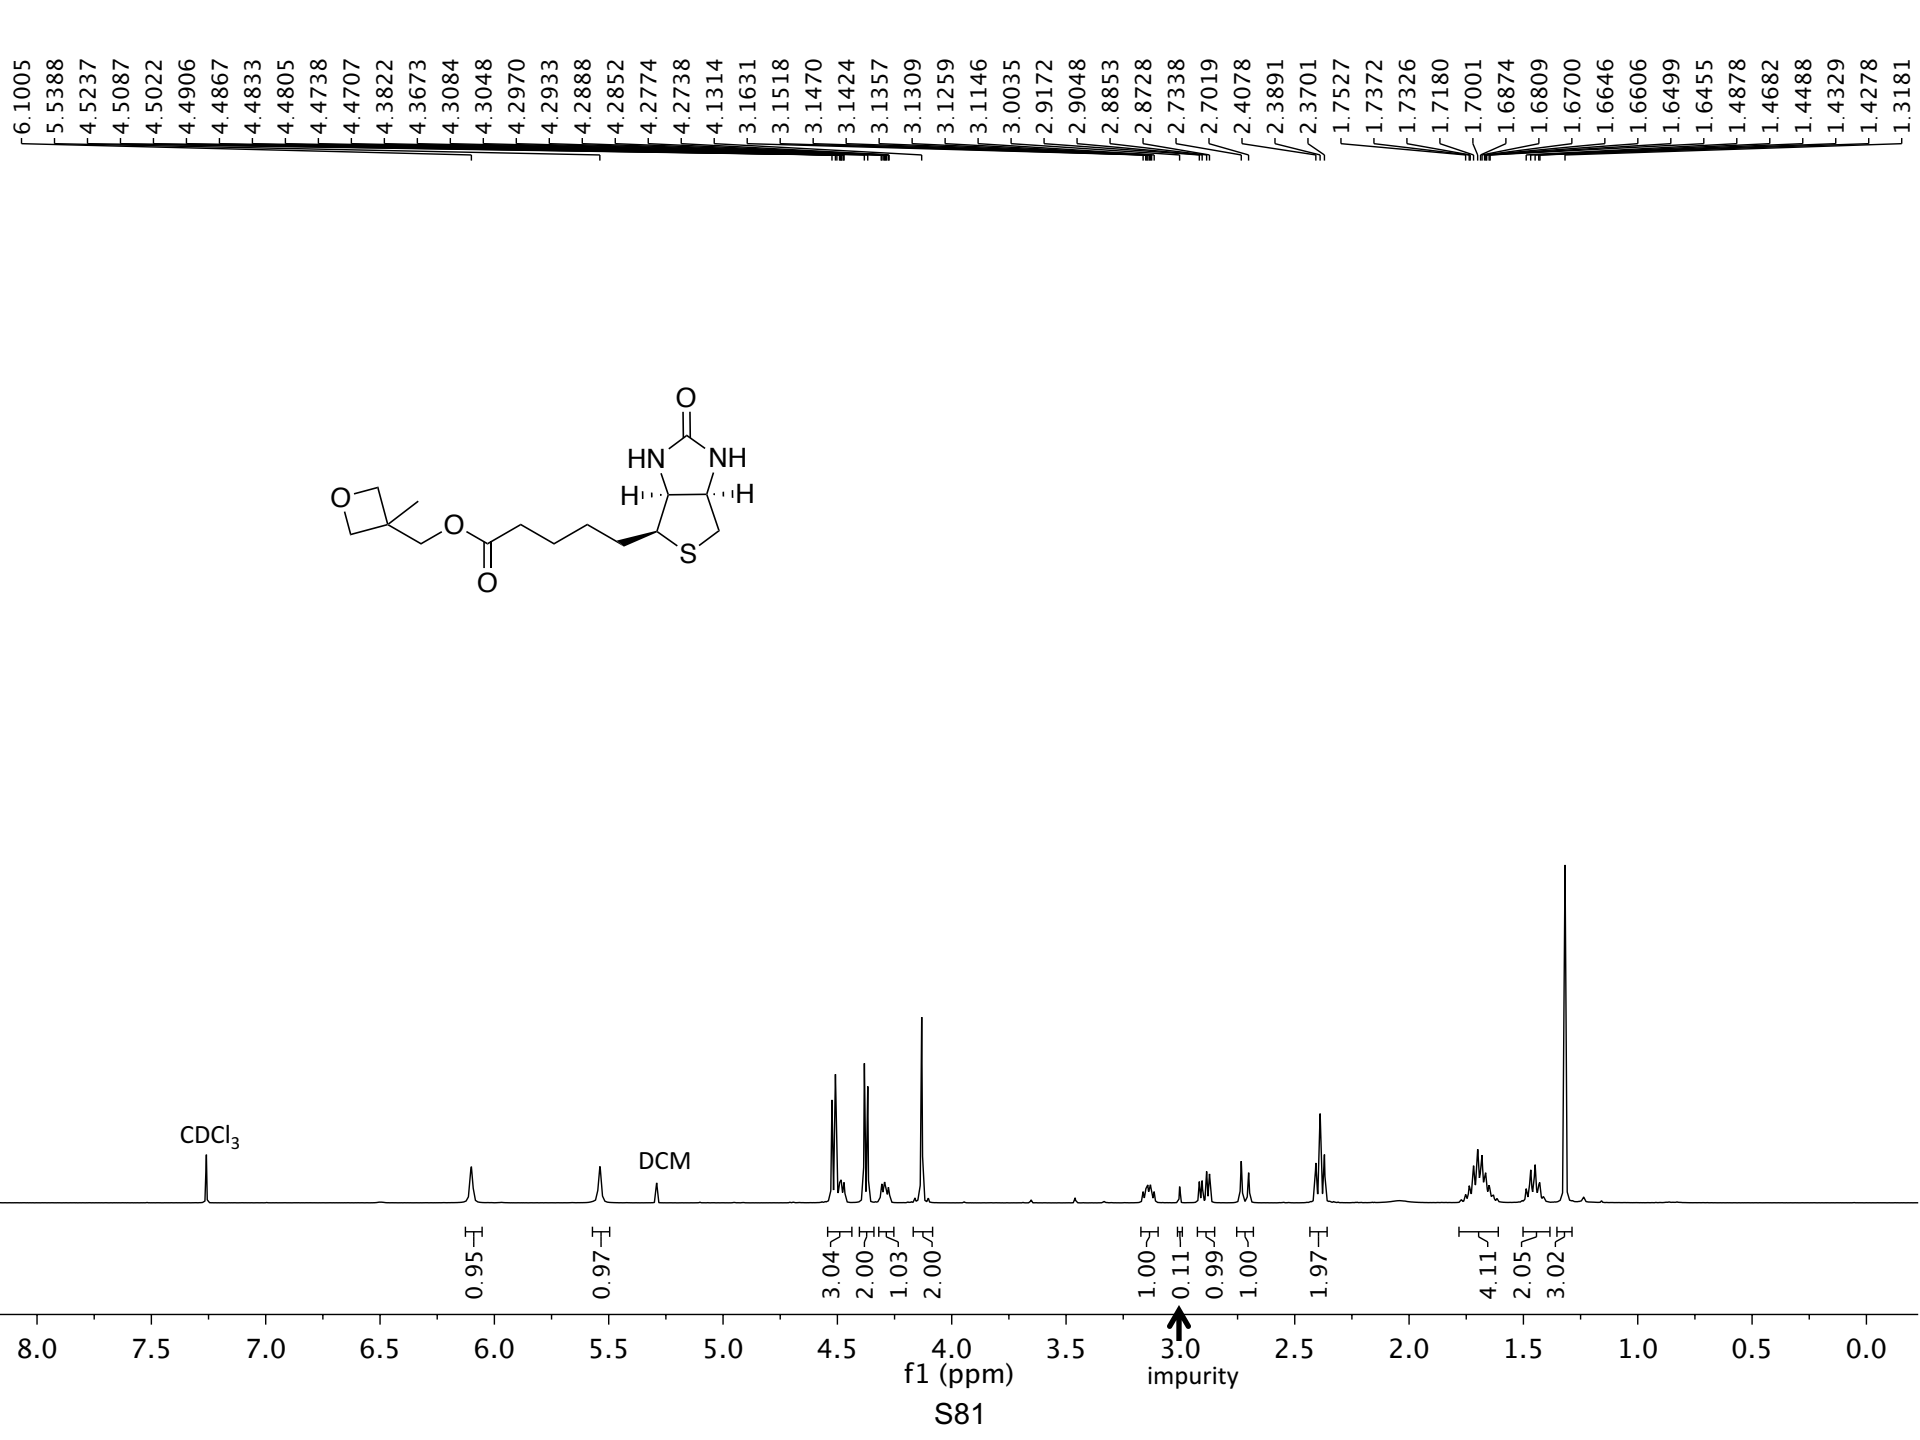

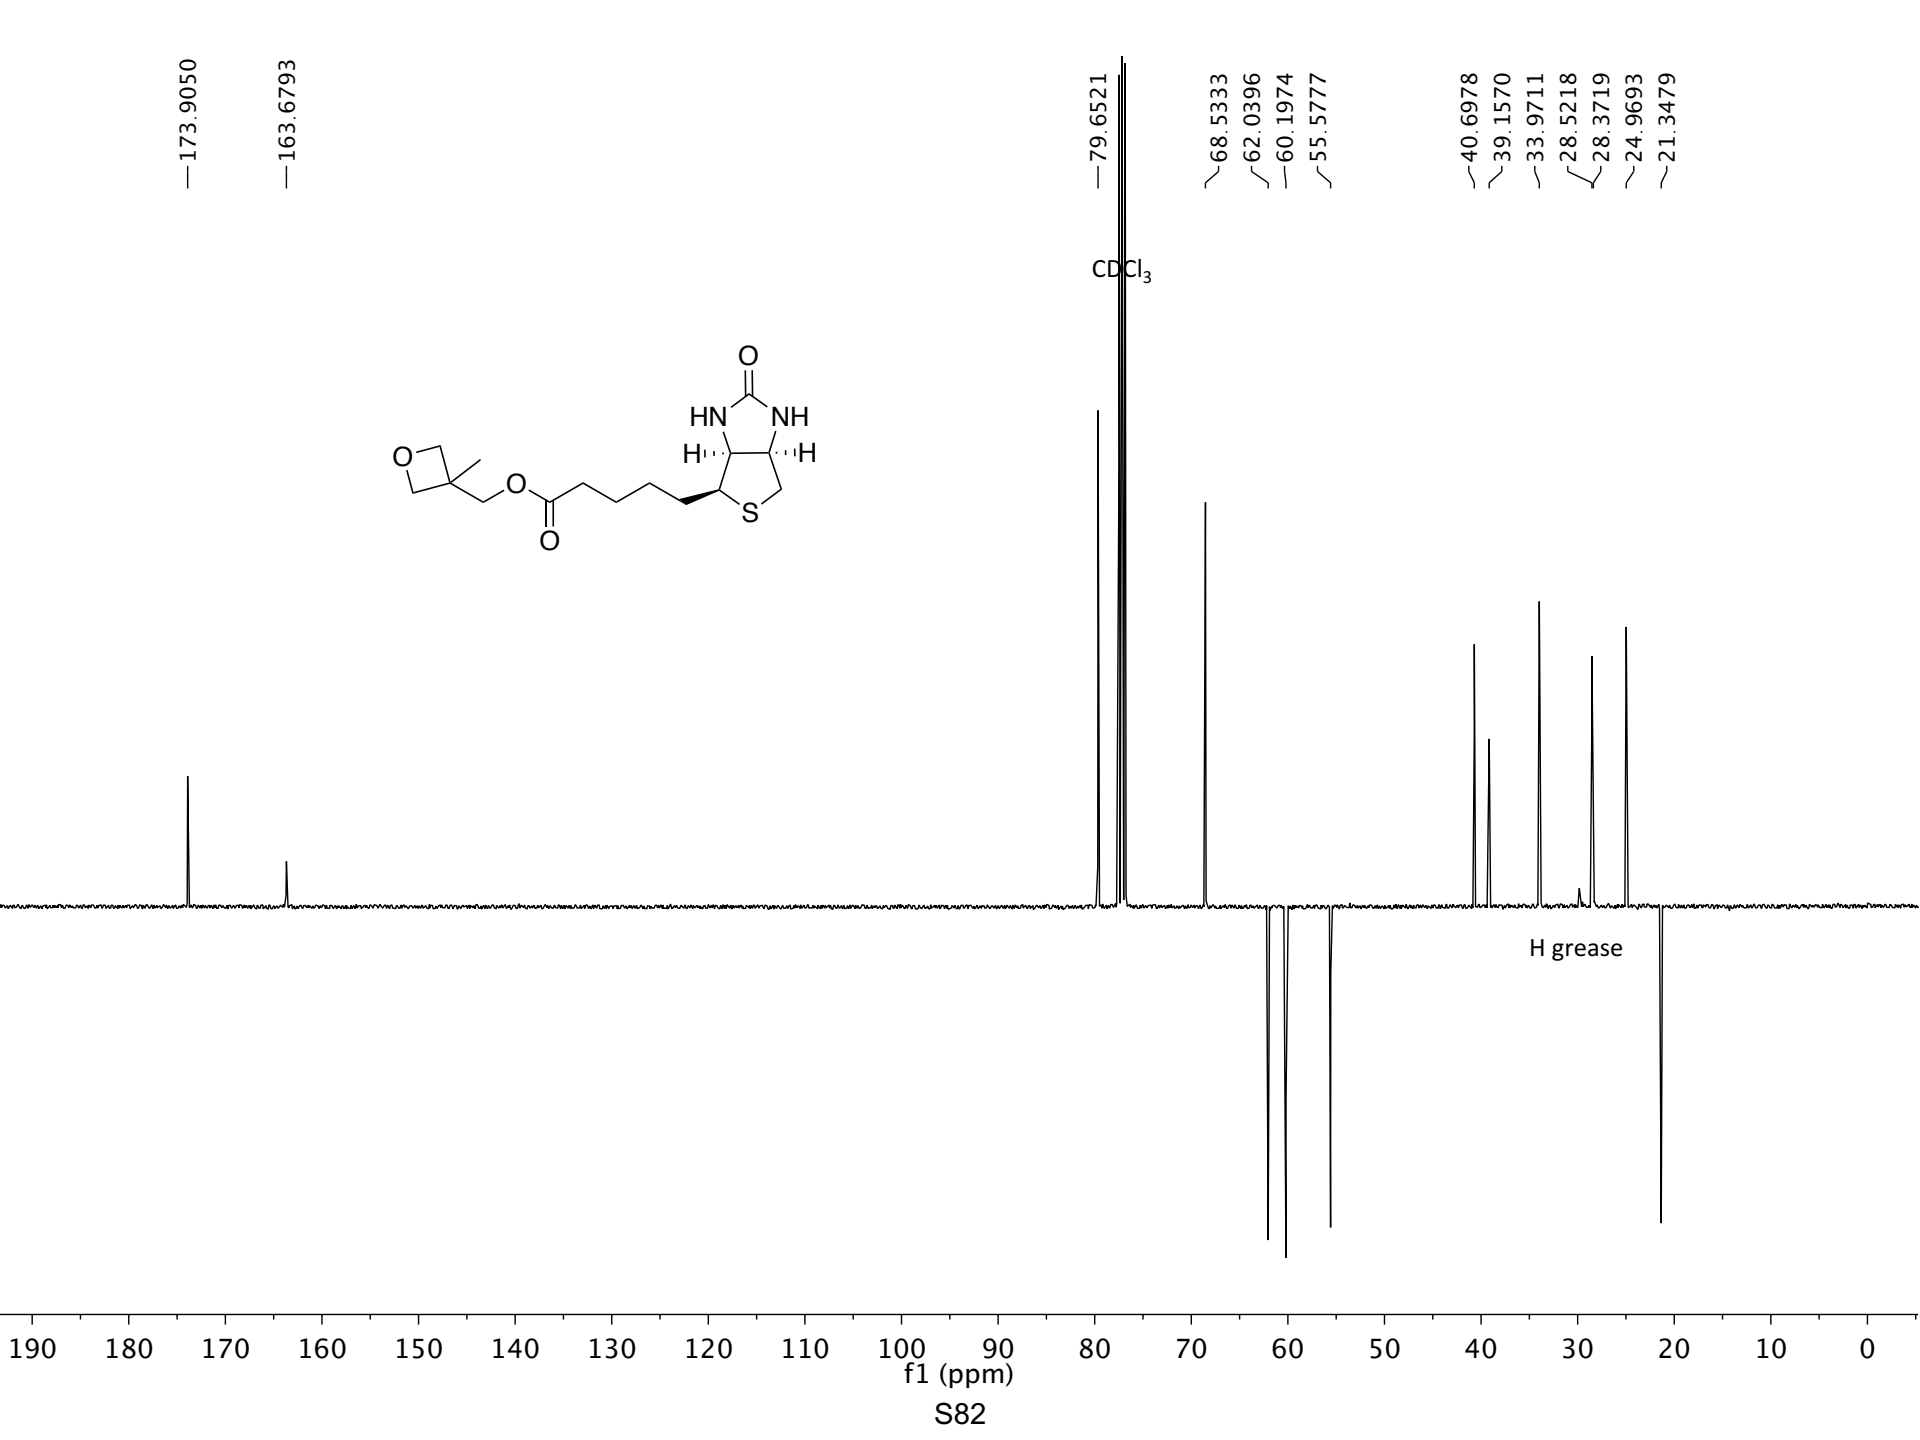

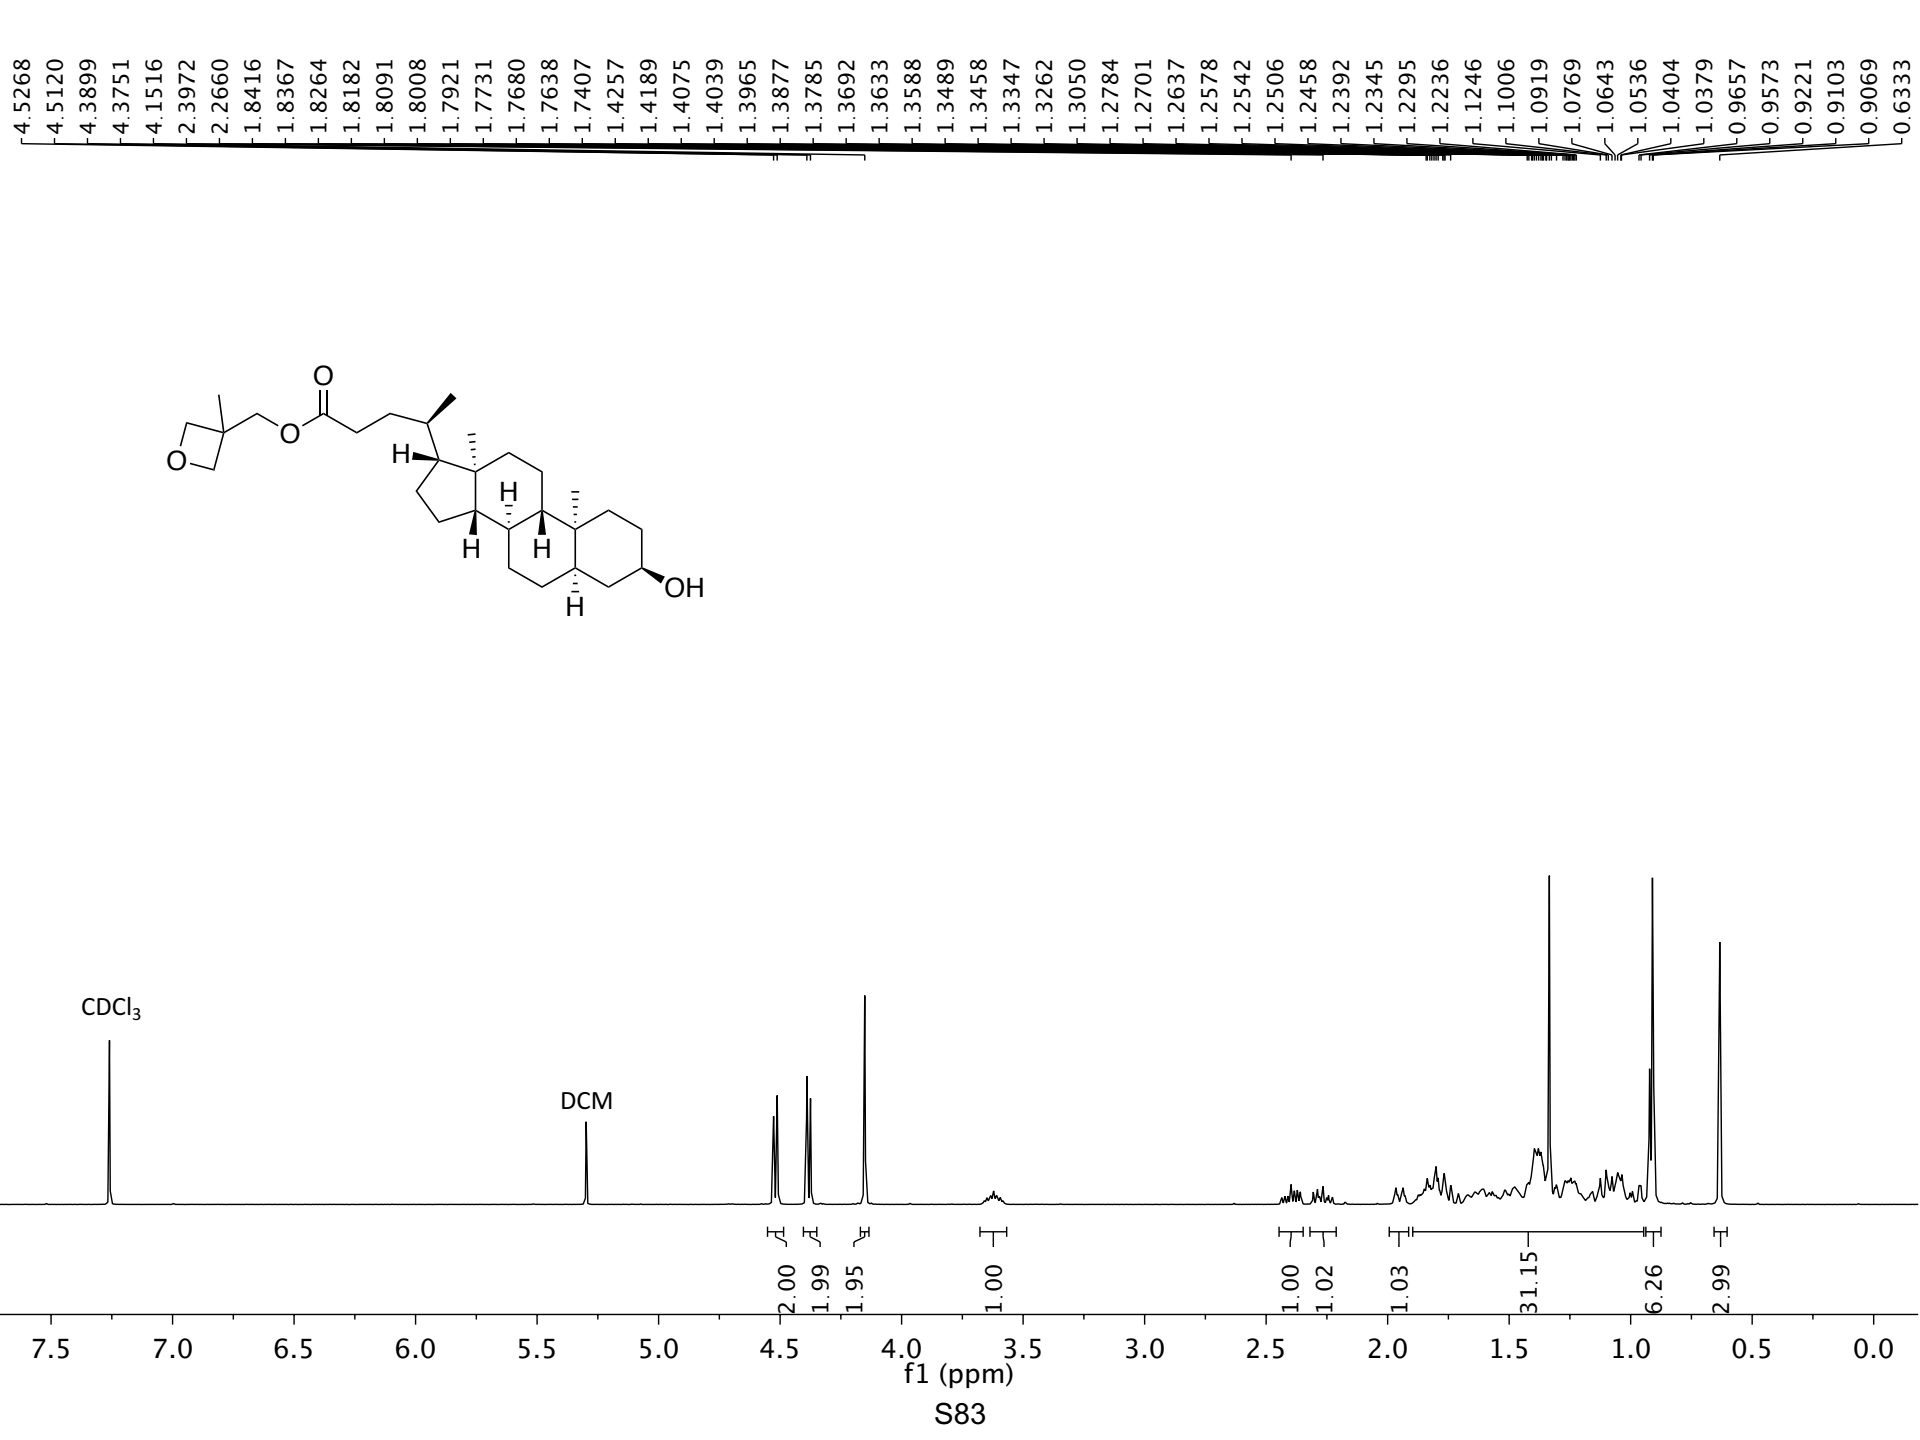

—174.5543

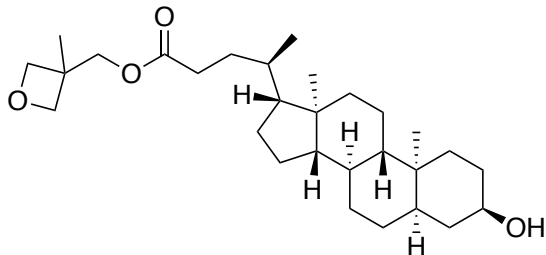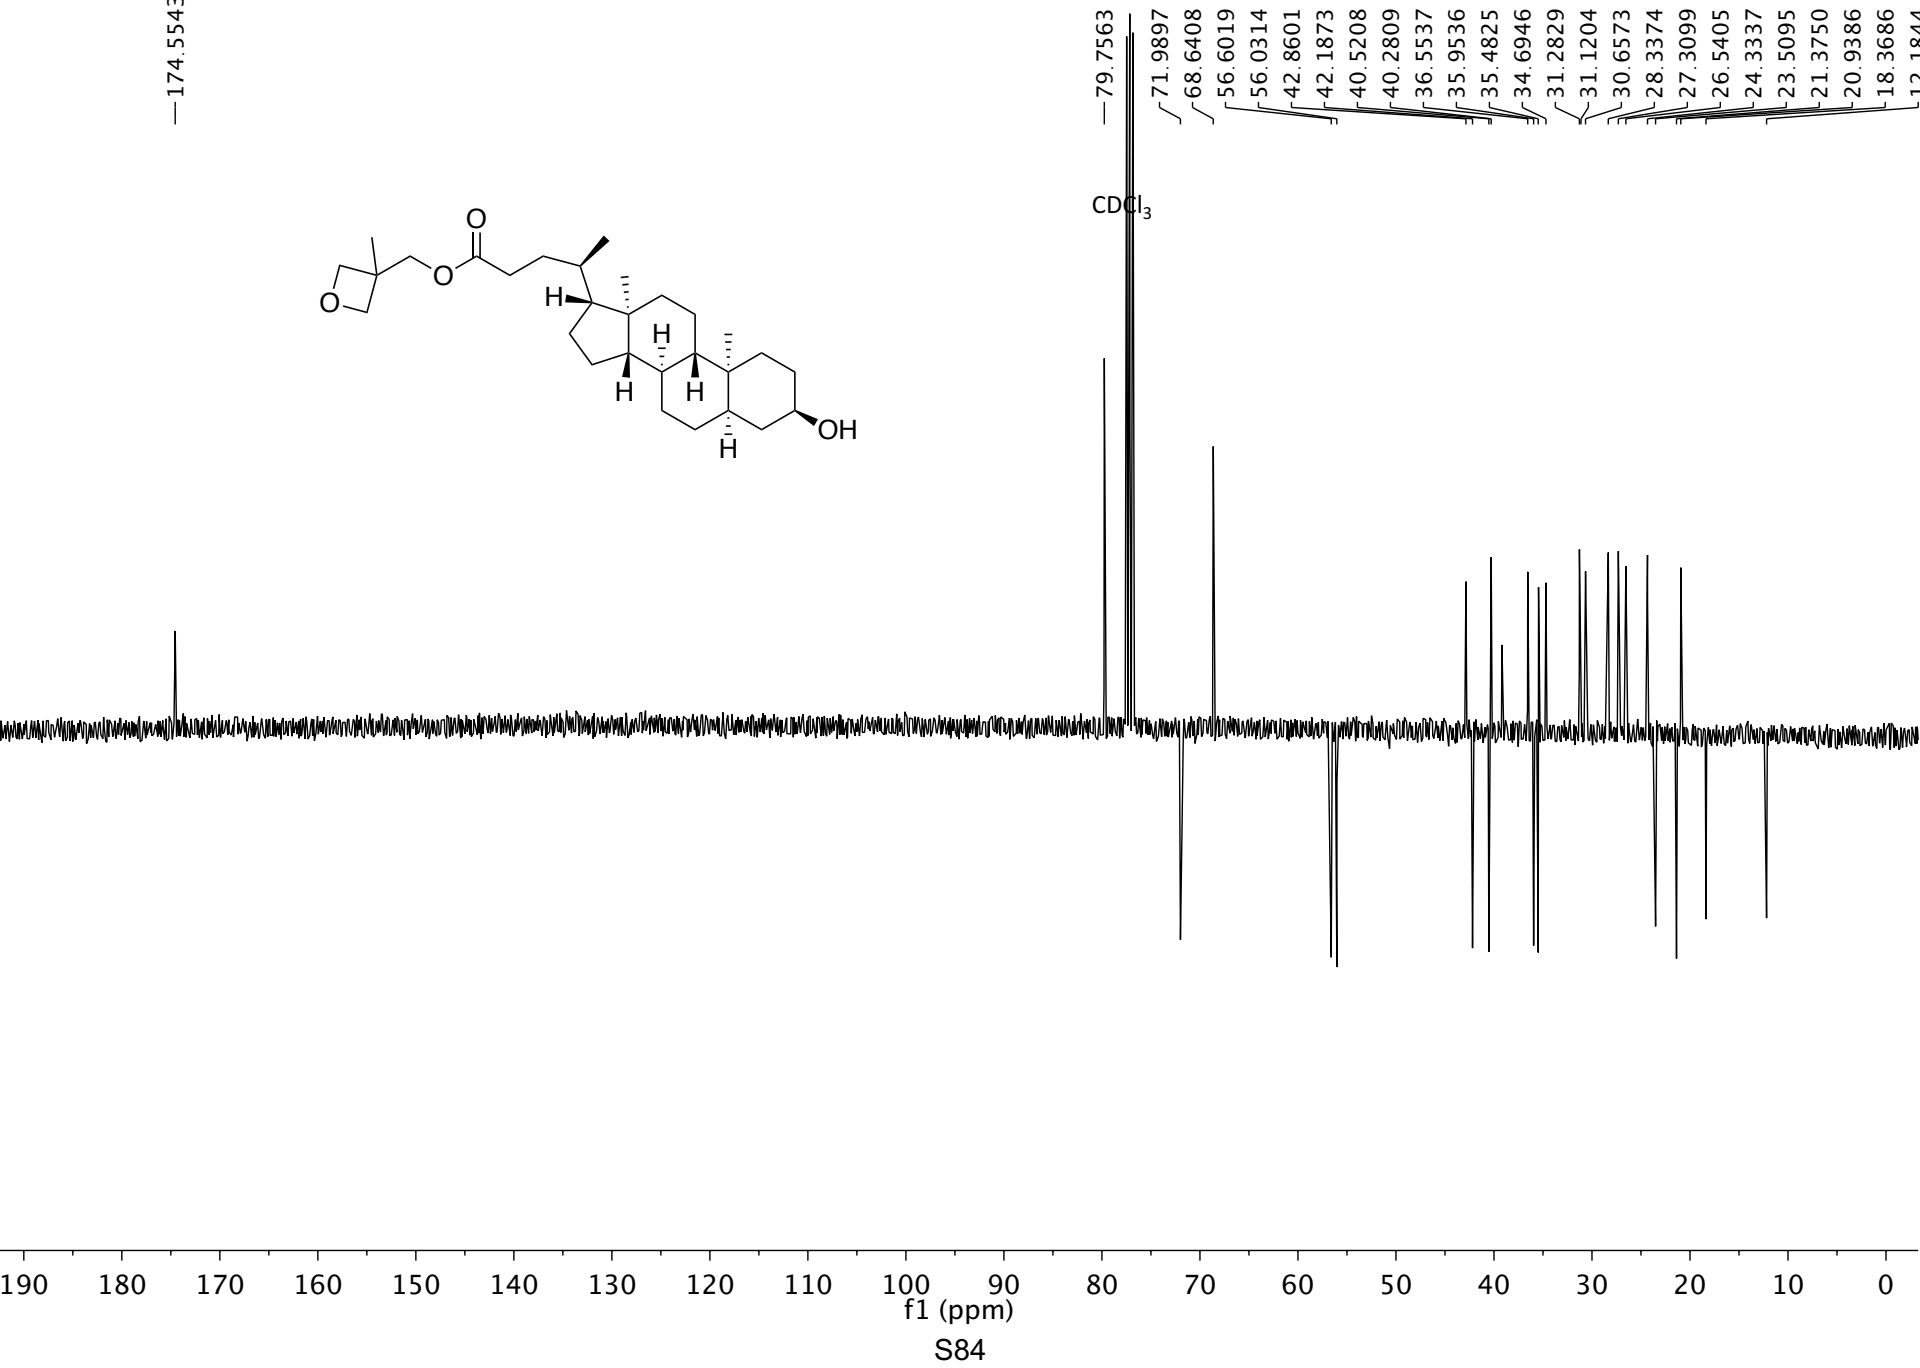

8.4323  
8.4297  
8.4276  
7.8198  
7.8158  
7.8053  
7.8013

6.8834  
6.8690

4.3170  
4.3070  
4.2215  
4.2115  
4.1850

1.6849  
1.6756  
1.6704  
1.6615  
1.3377  
1.3287  
1.3236  
1.3143  
1.1372

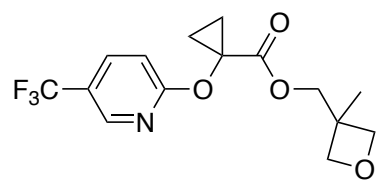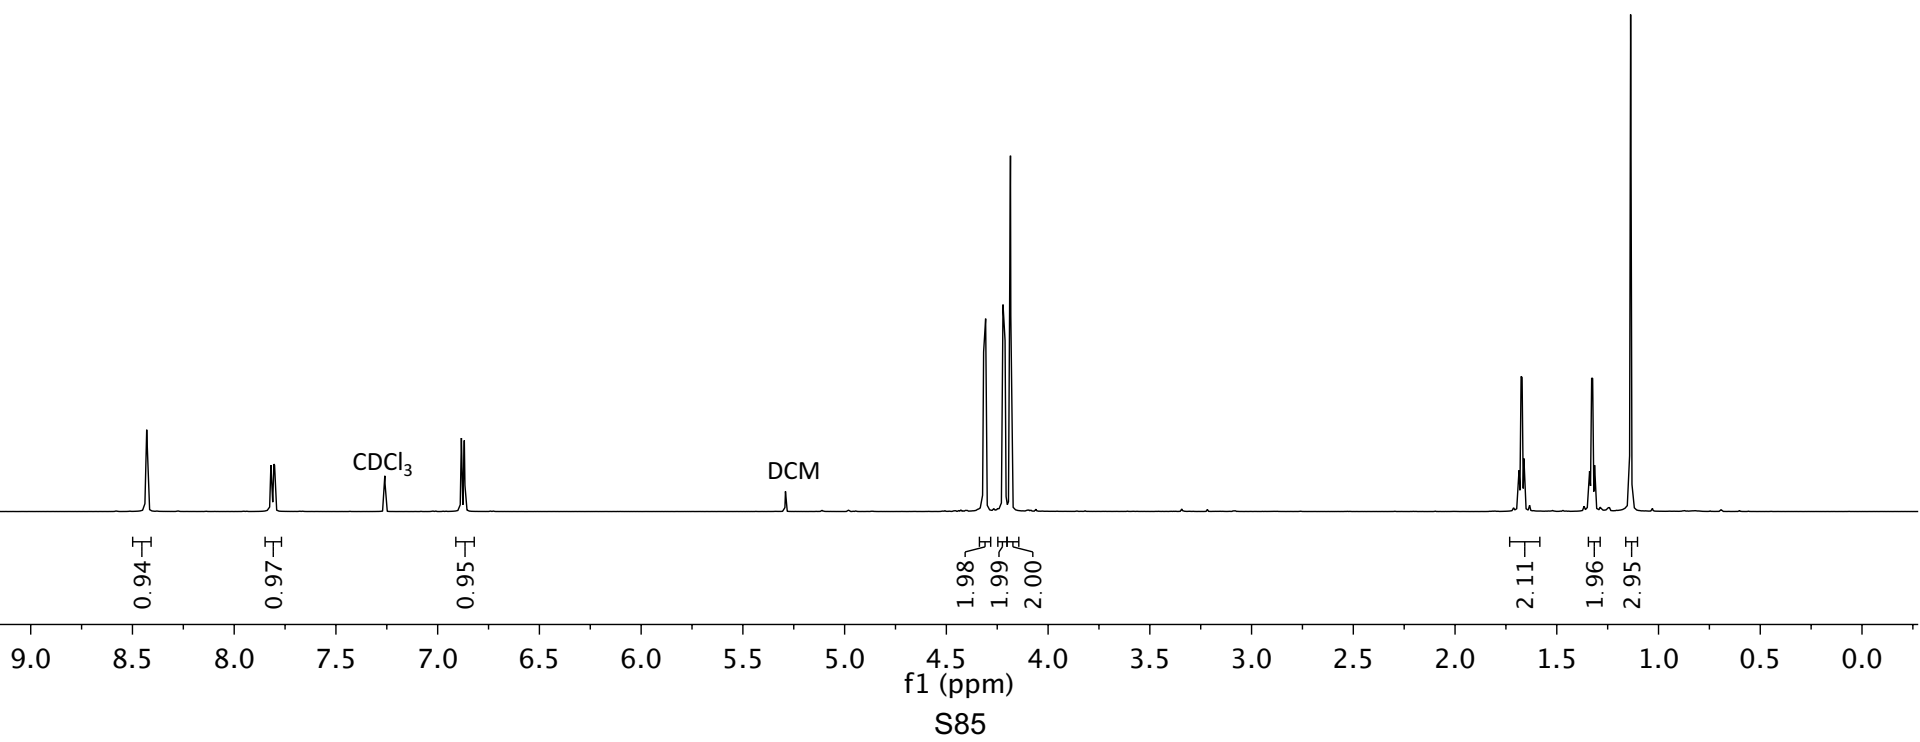

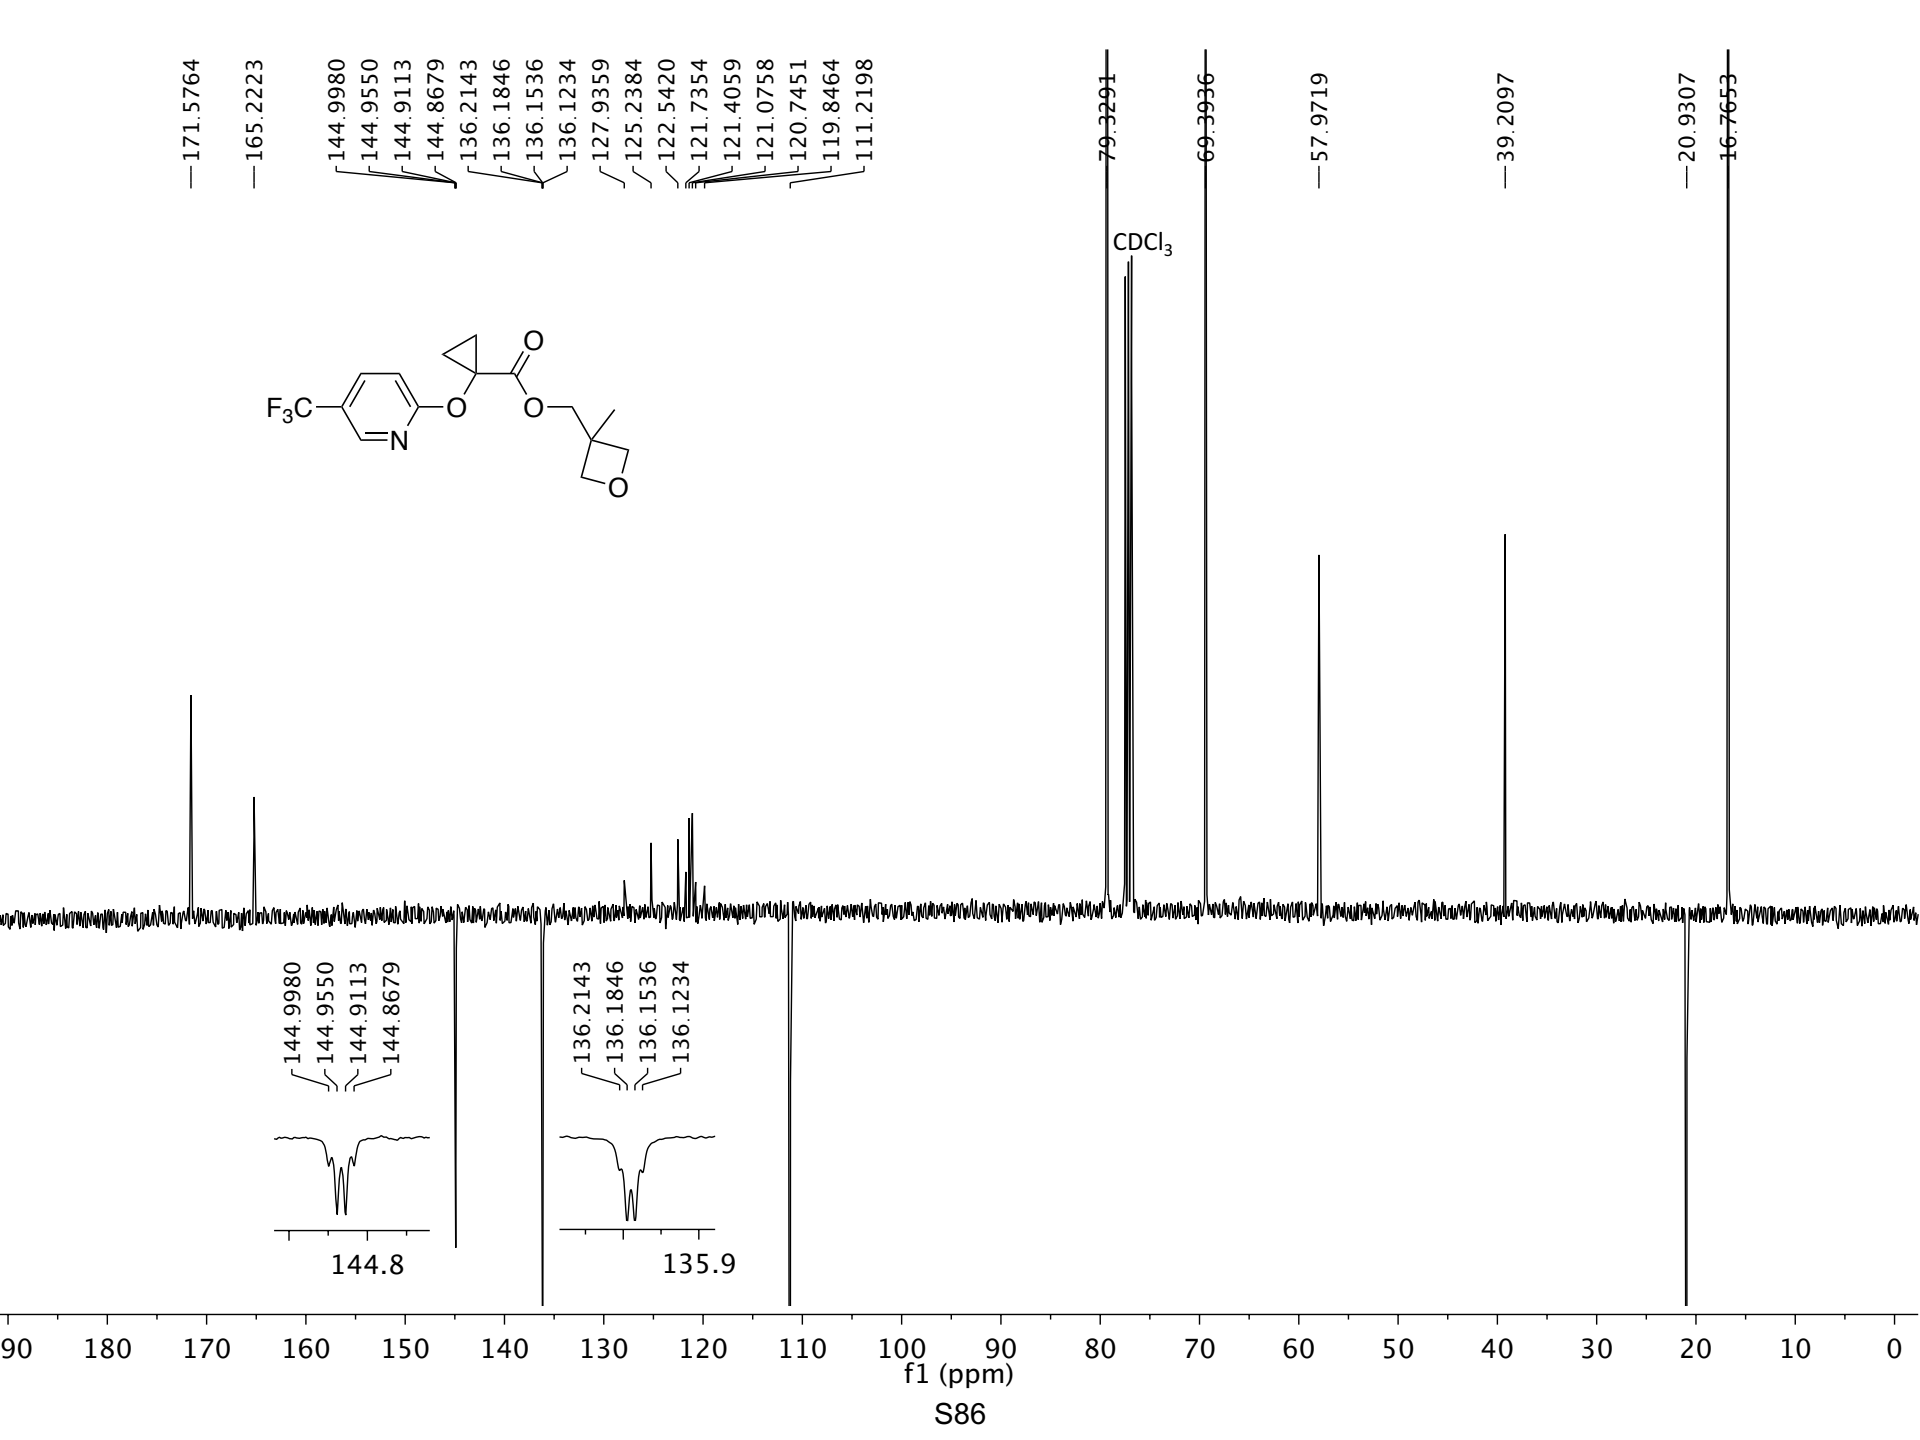

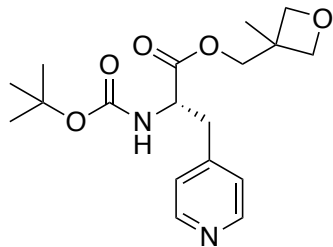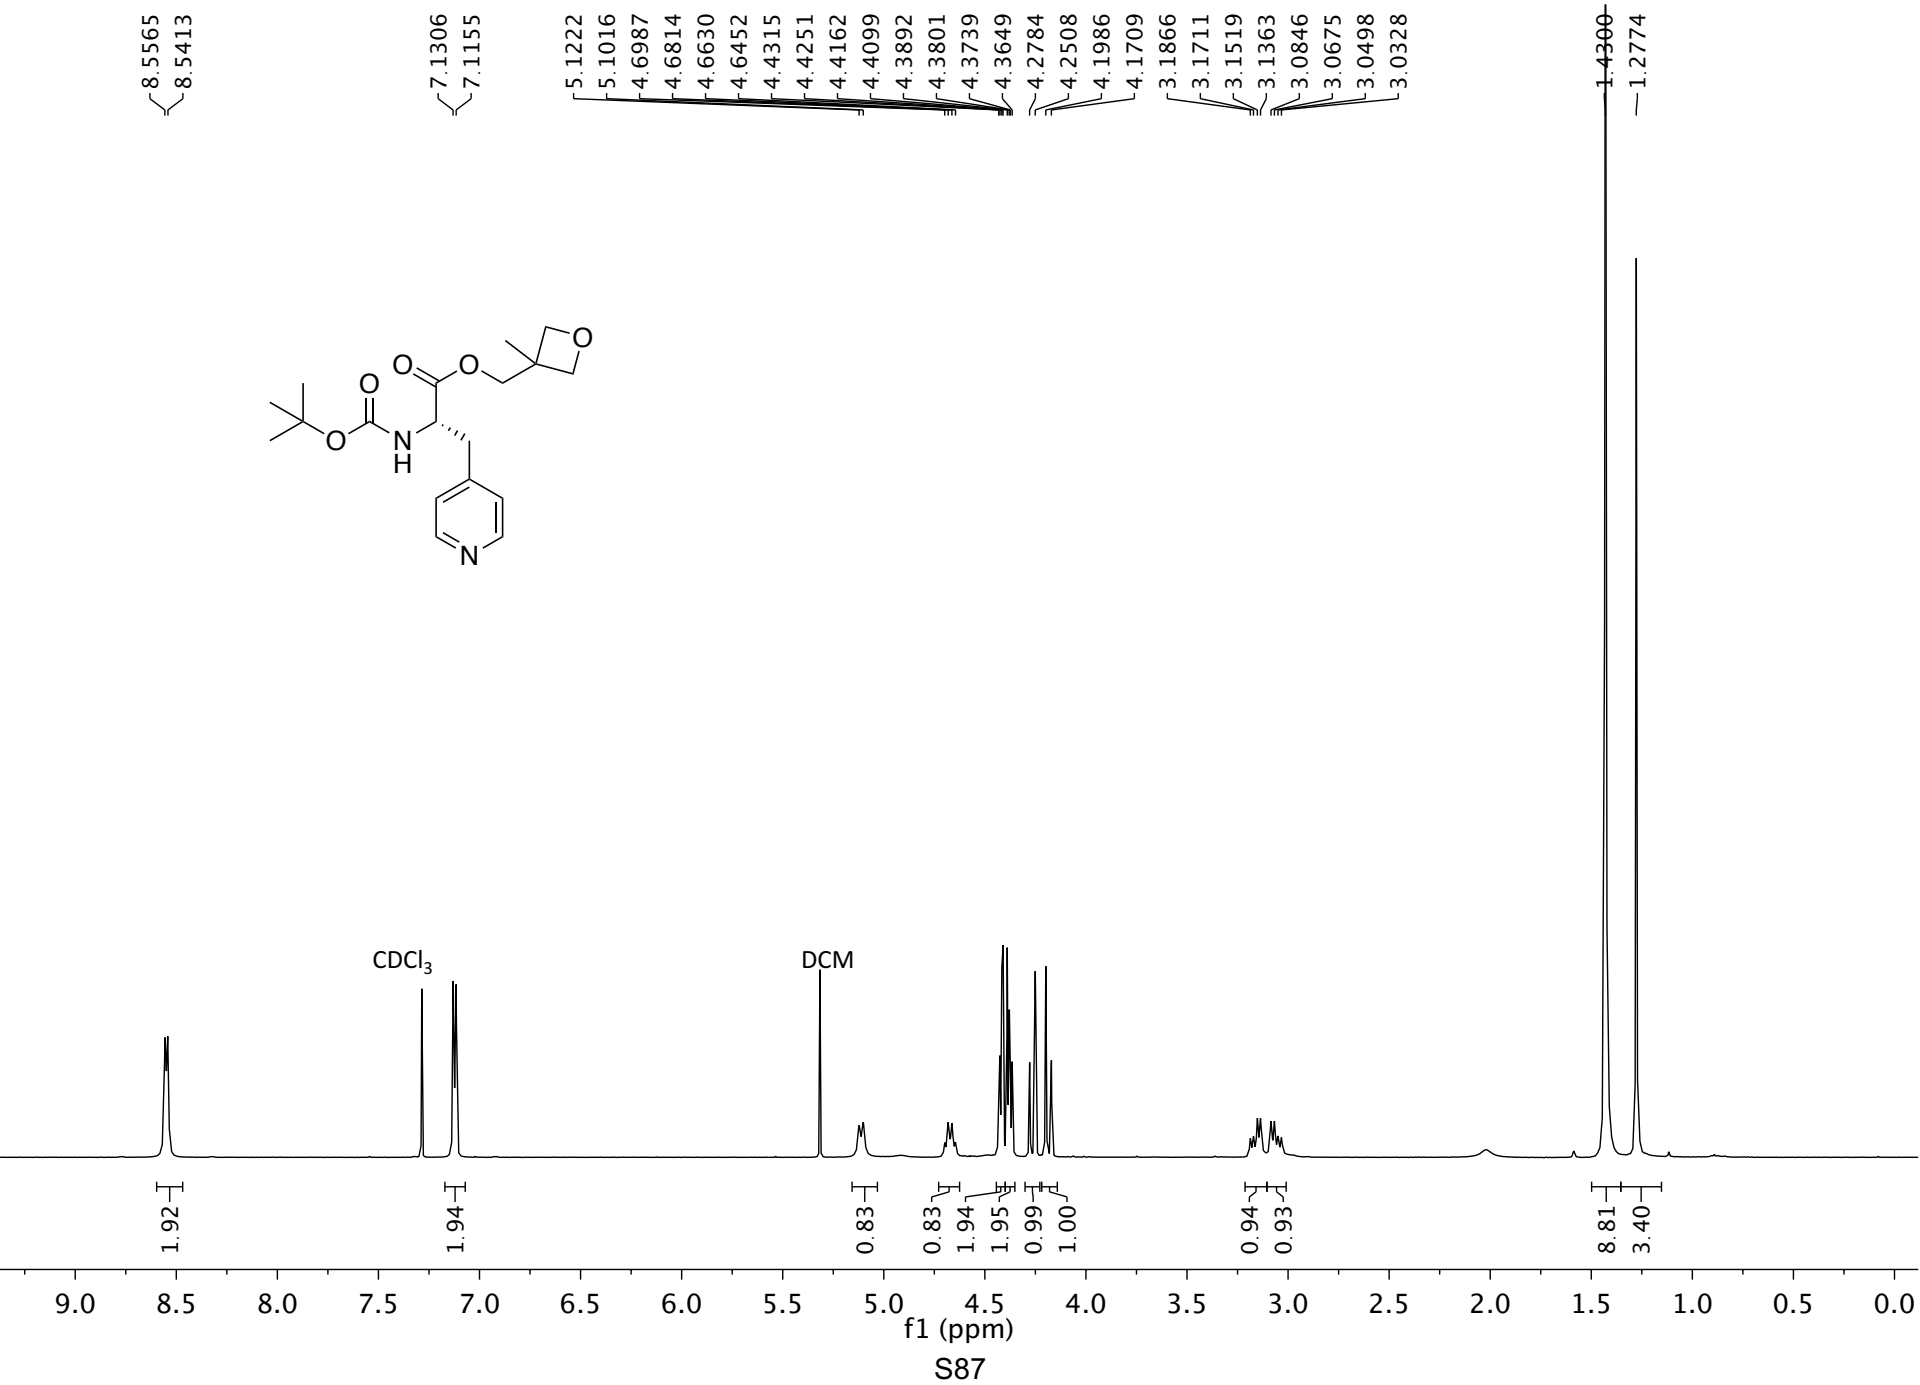

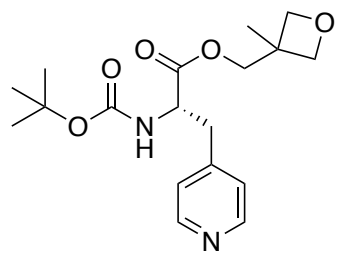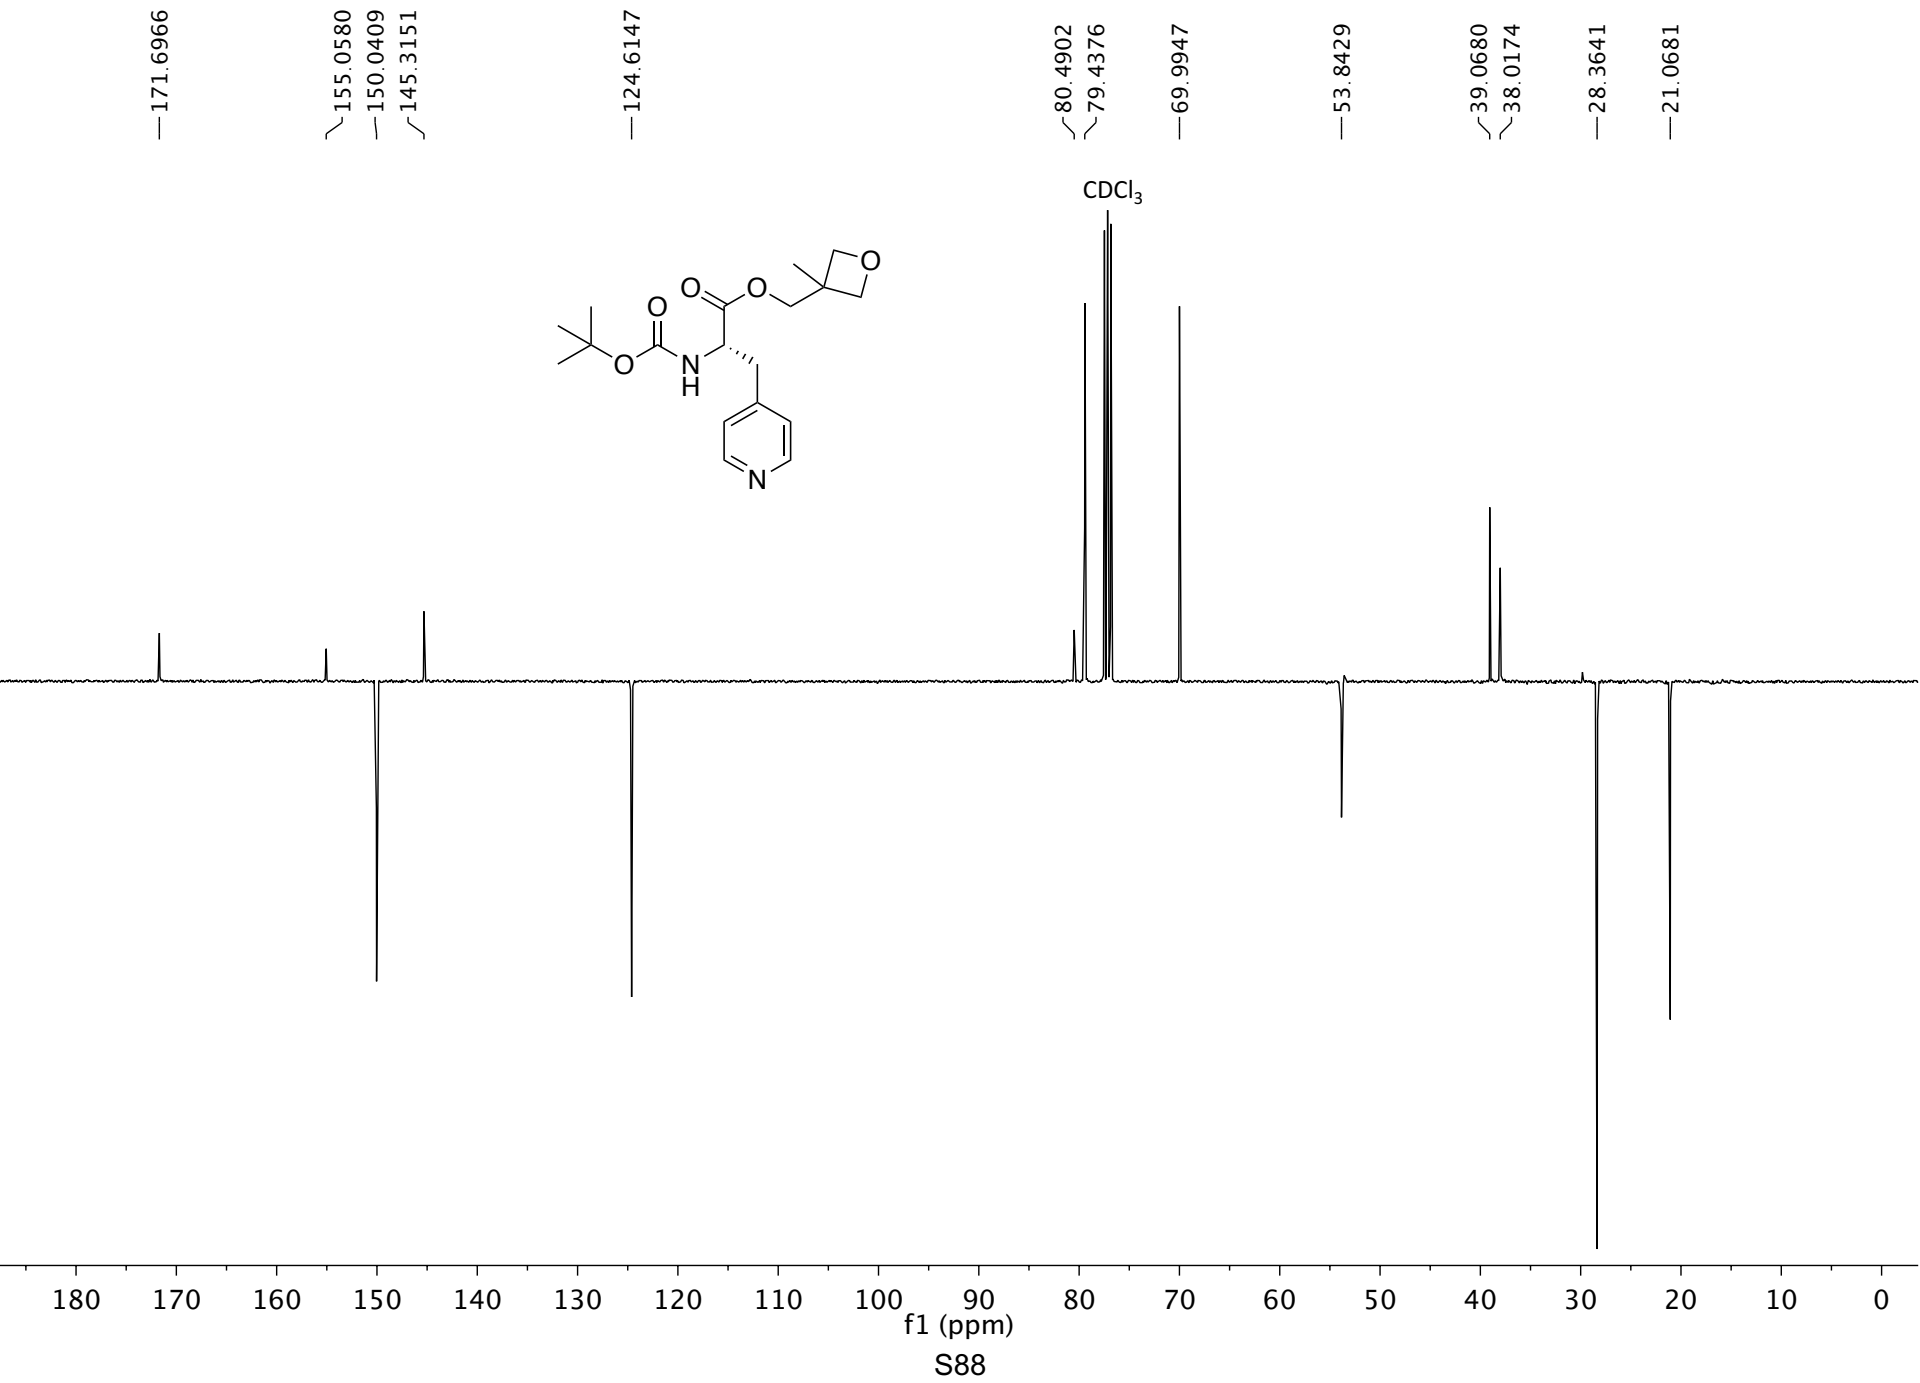



7.6832  
7.4883  
7.4791  
7.4710  
7.4620  
7.4503  
7.4414  
7.4323  
7.4248

4.5100  
4.4949  
4.3949  
4.3798  
4.2478  
3.7592

1.3249

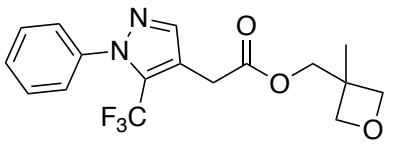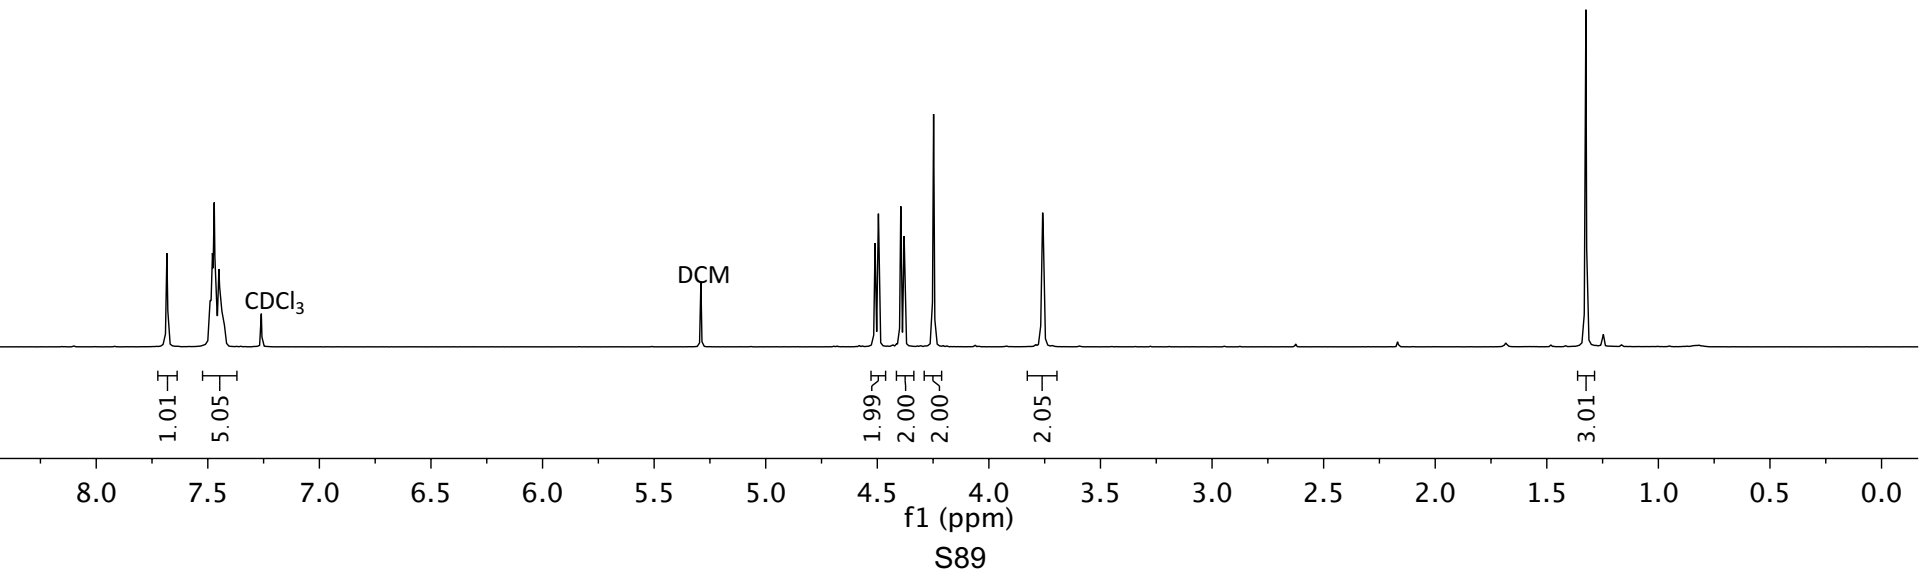

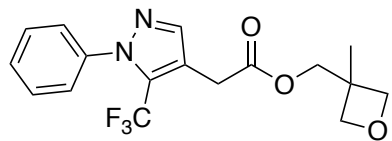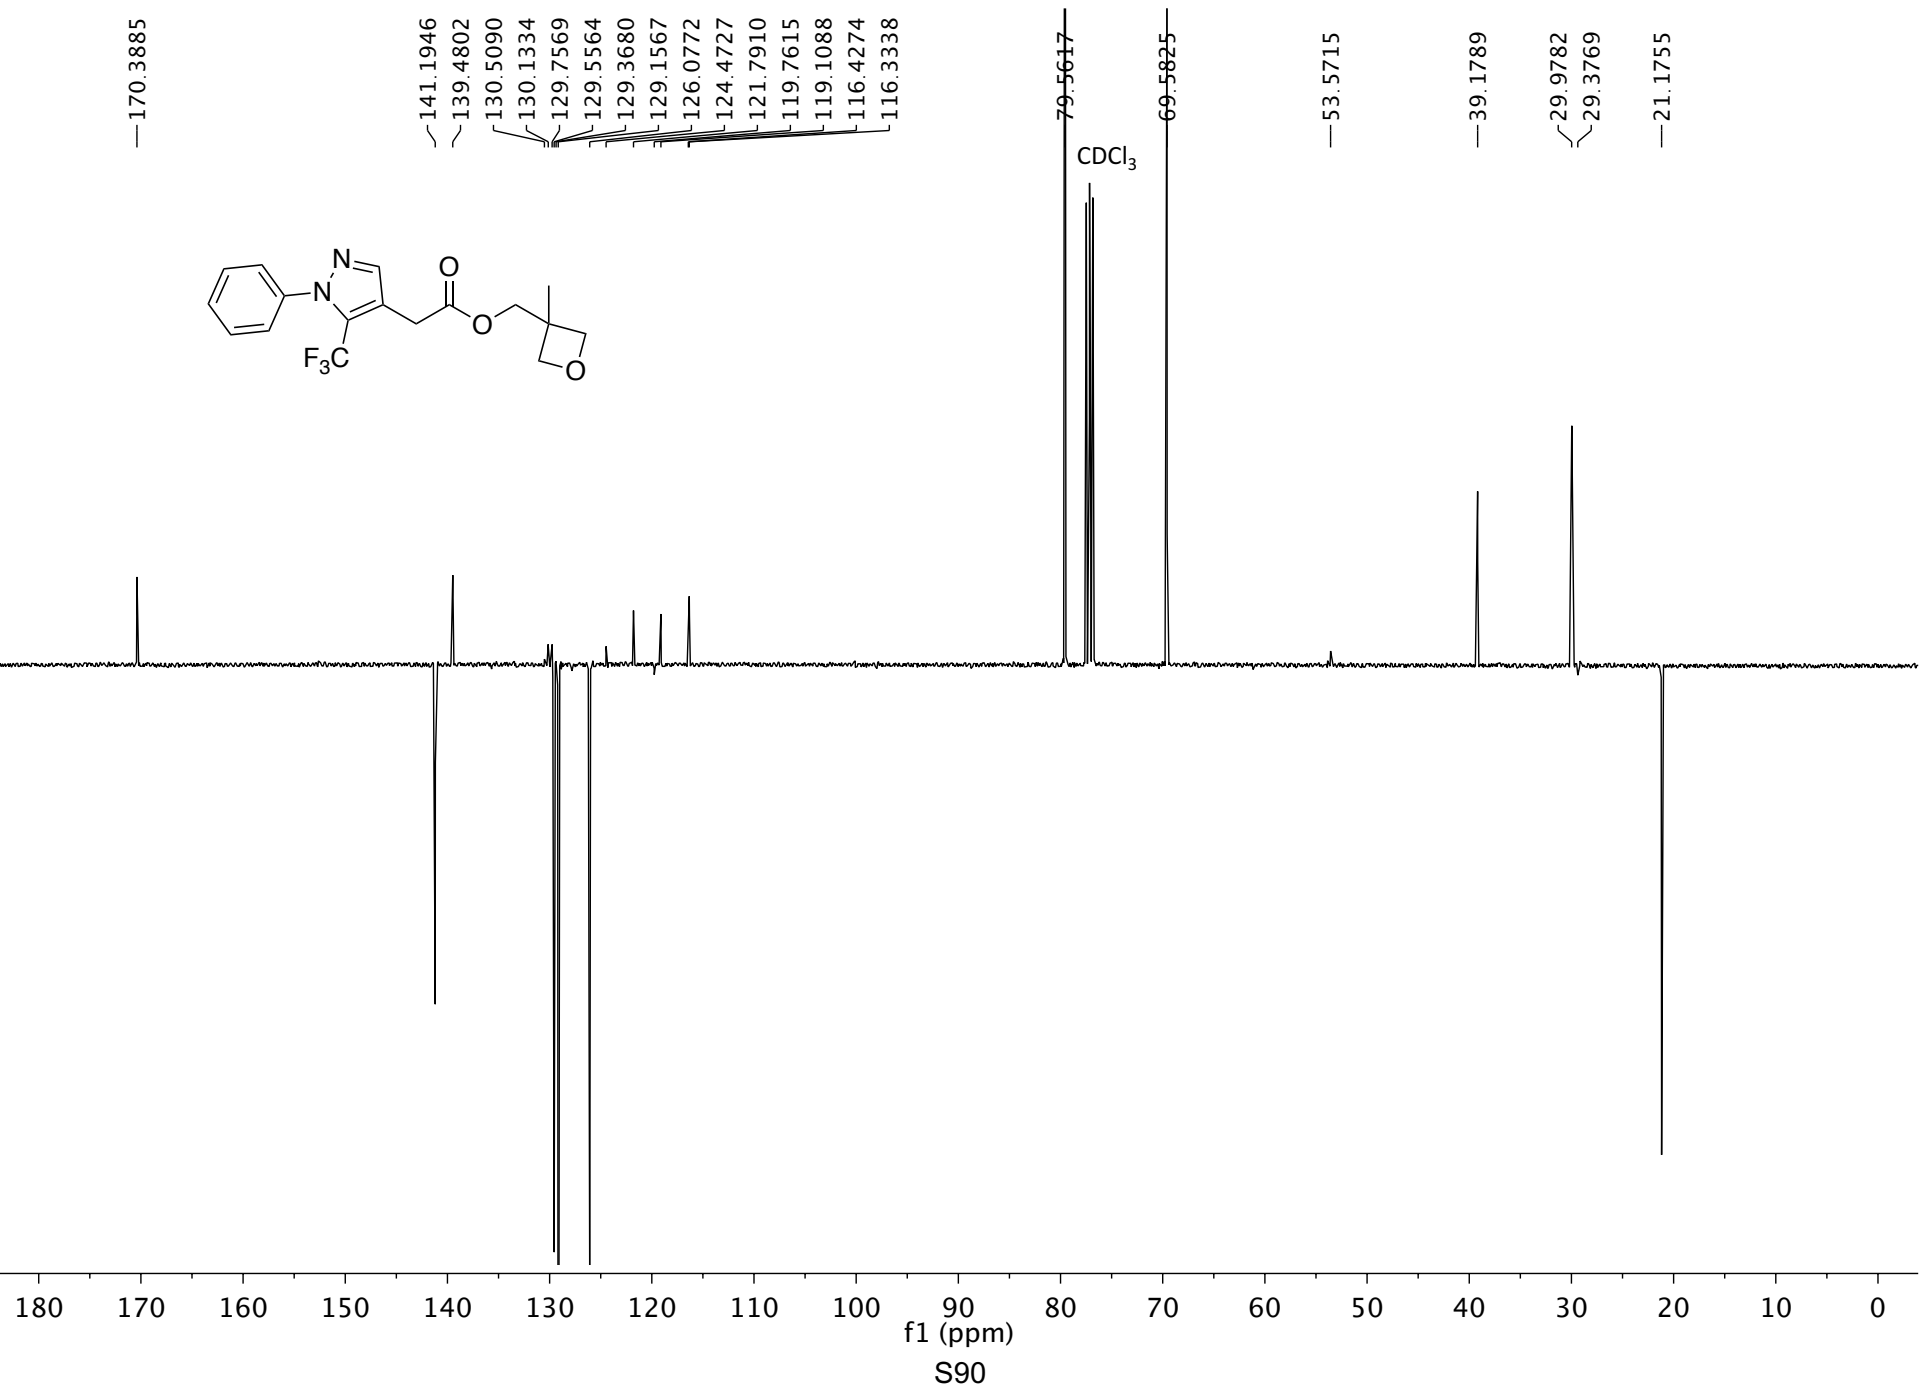

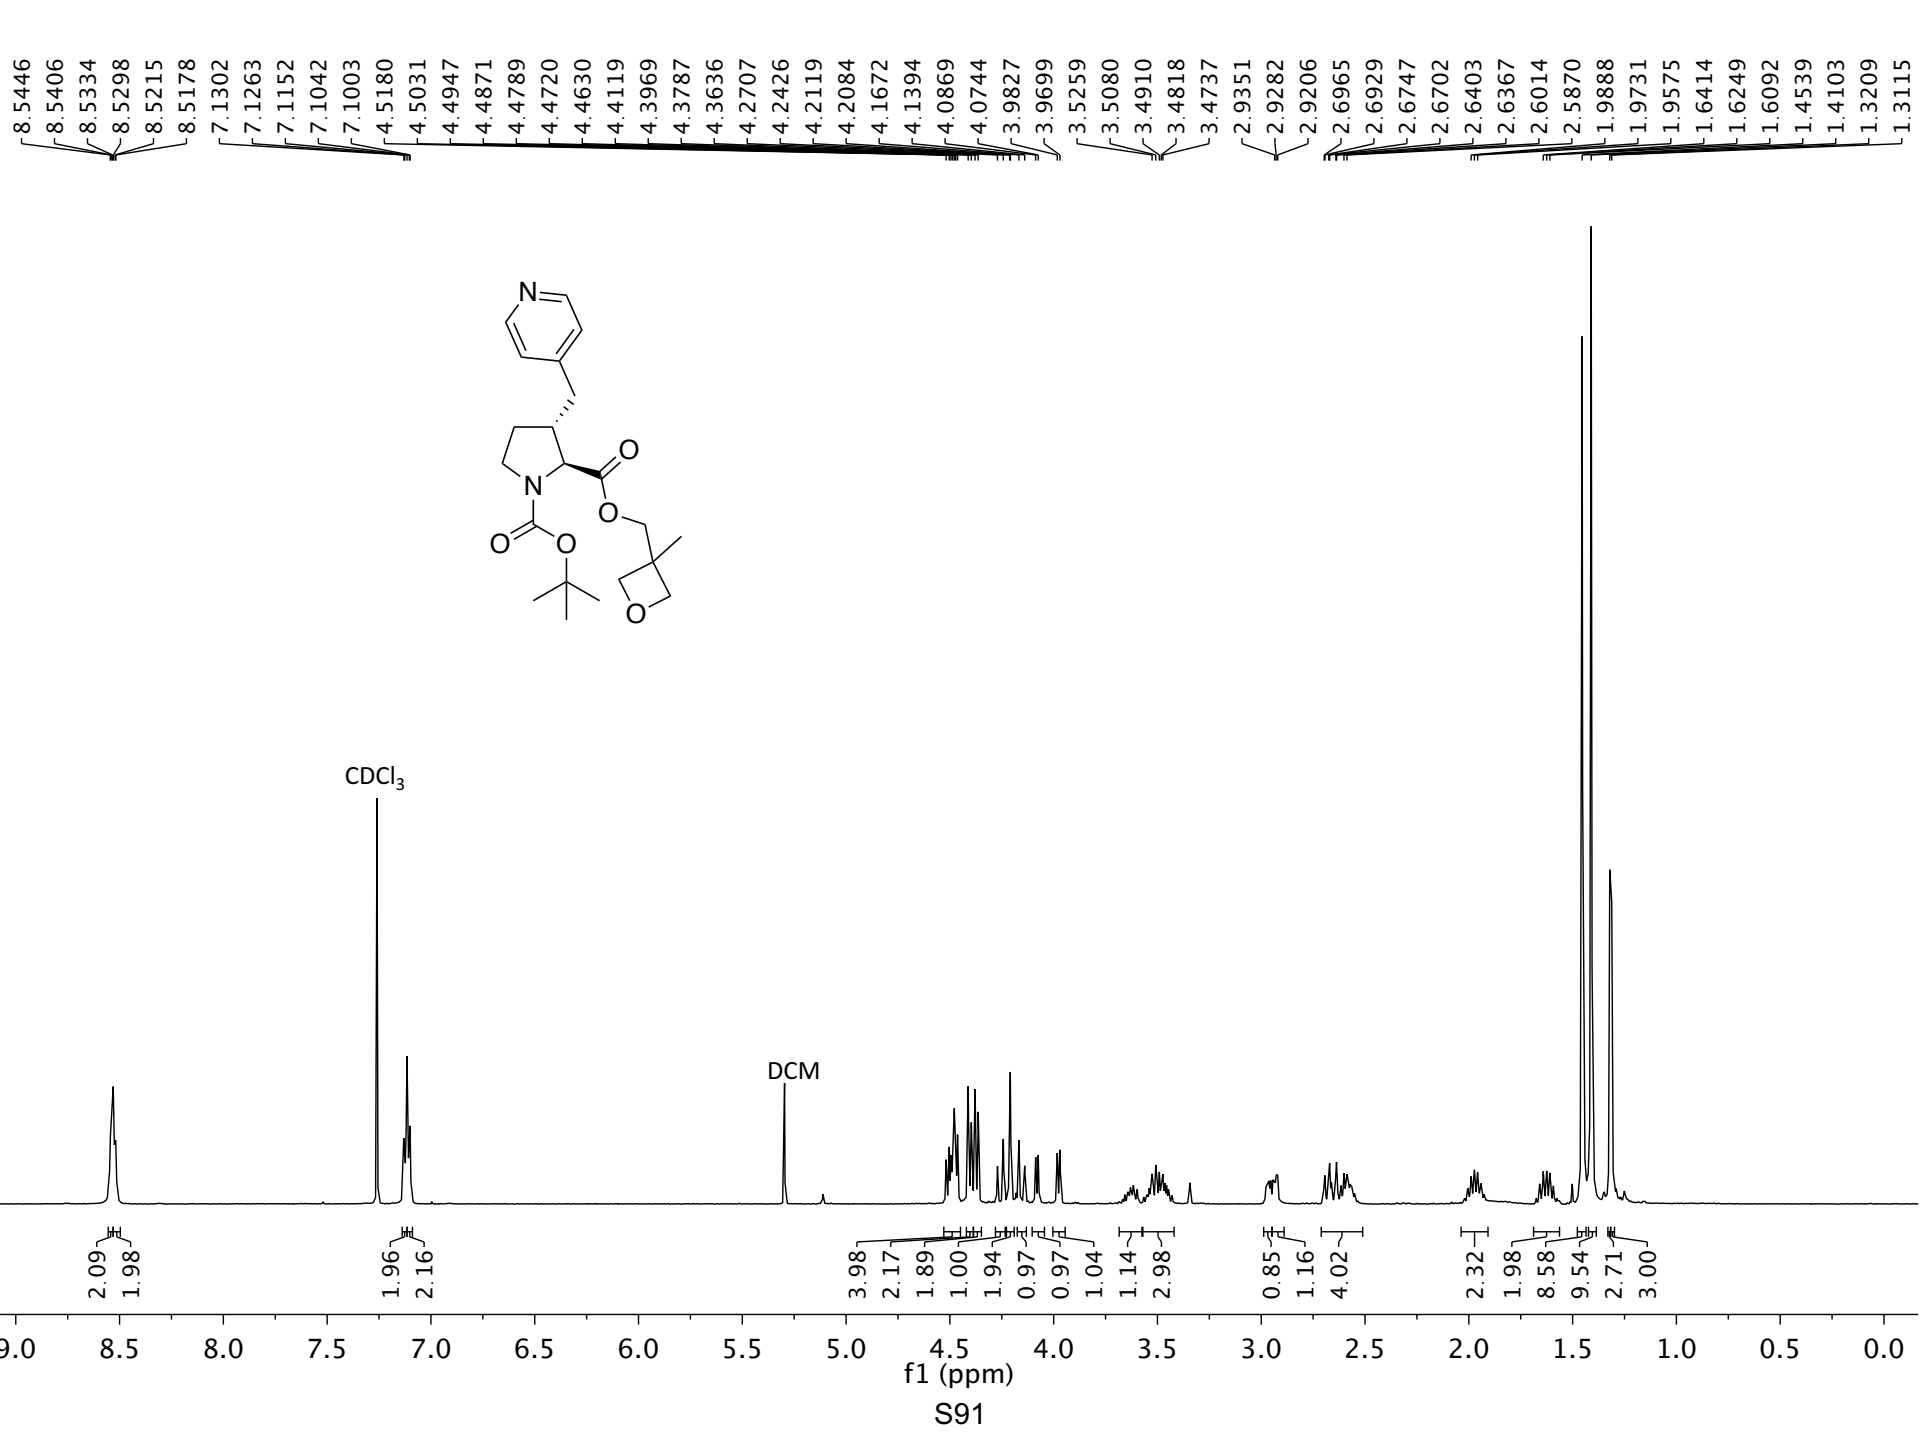

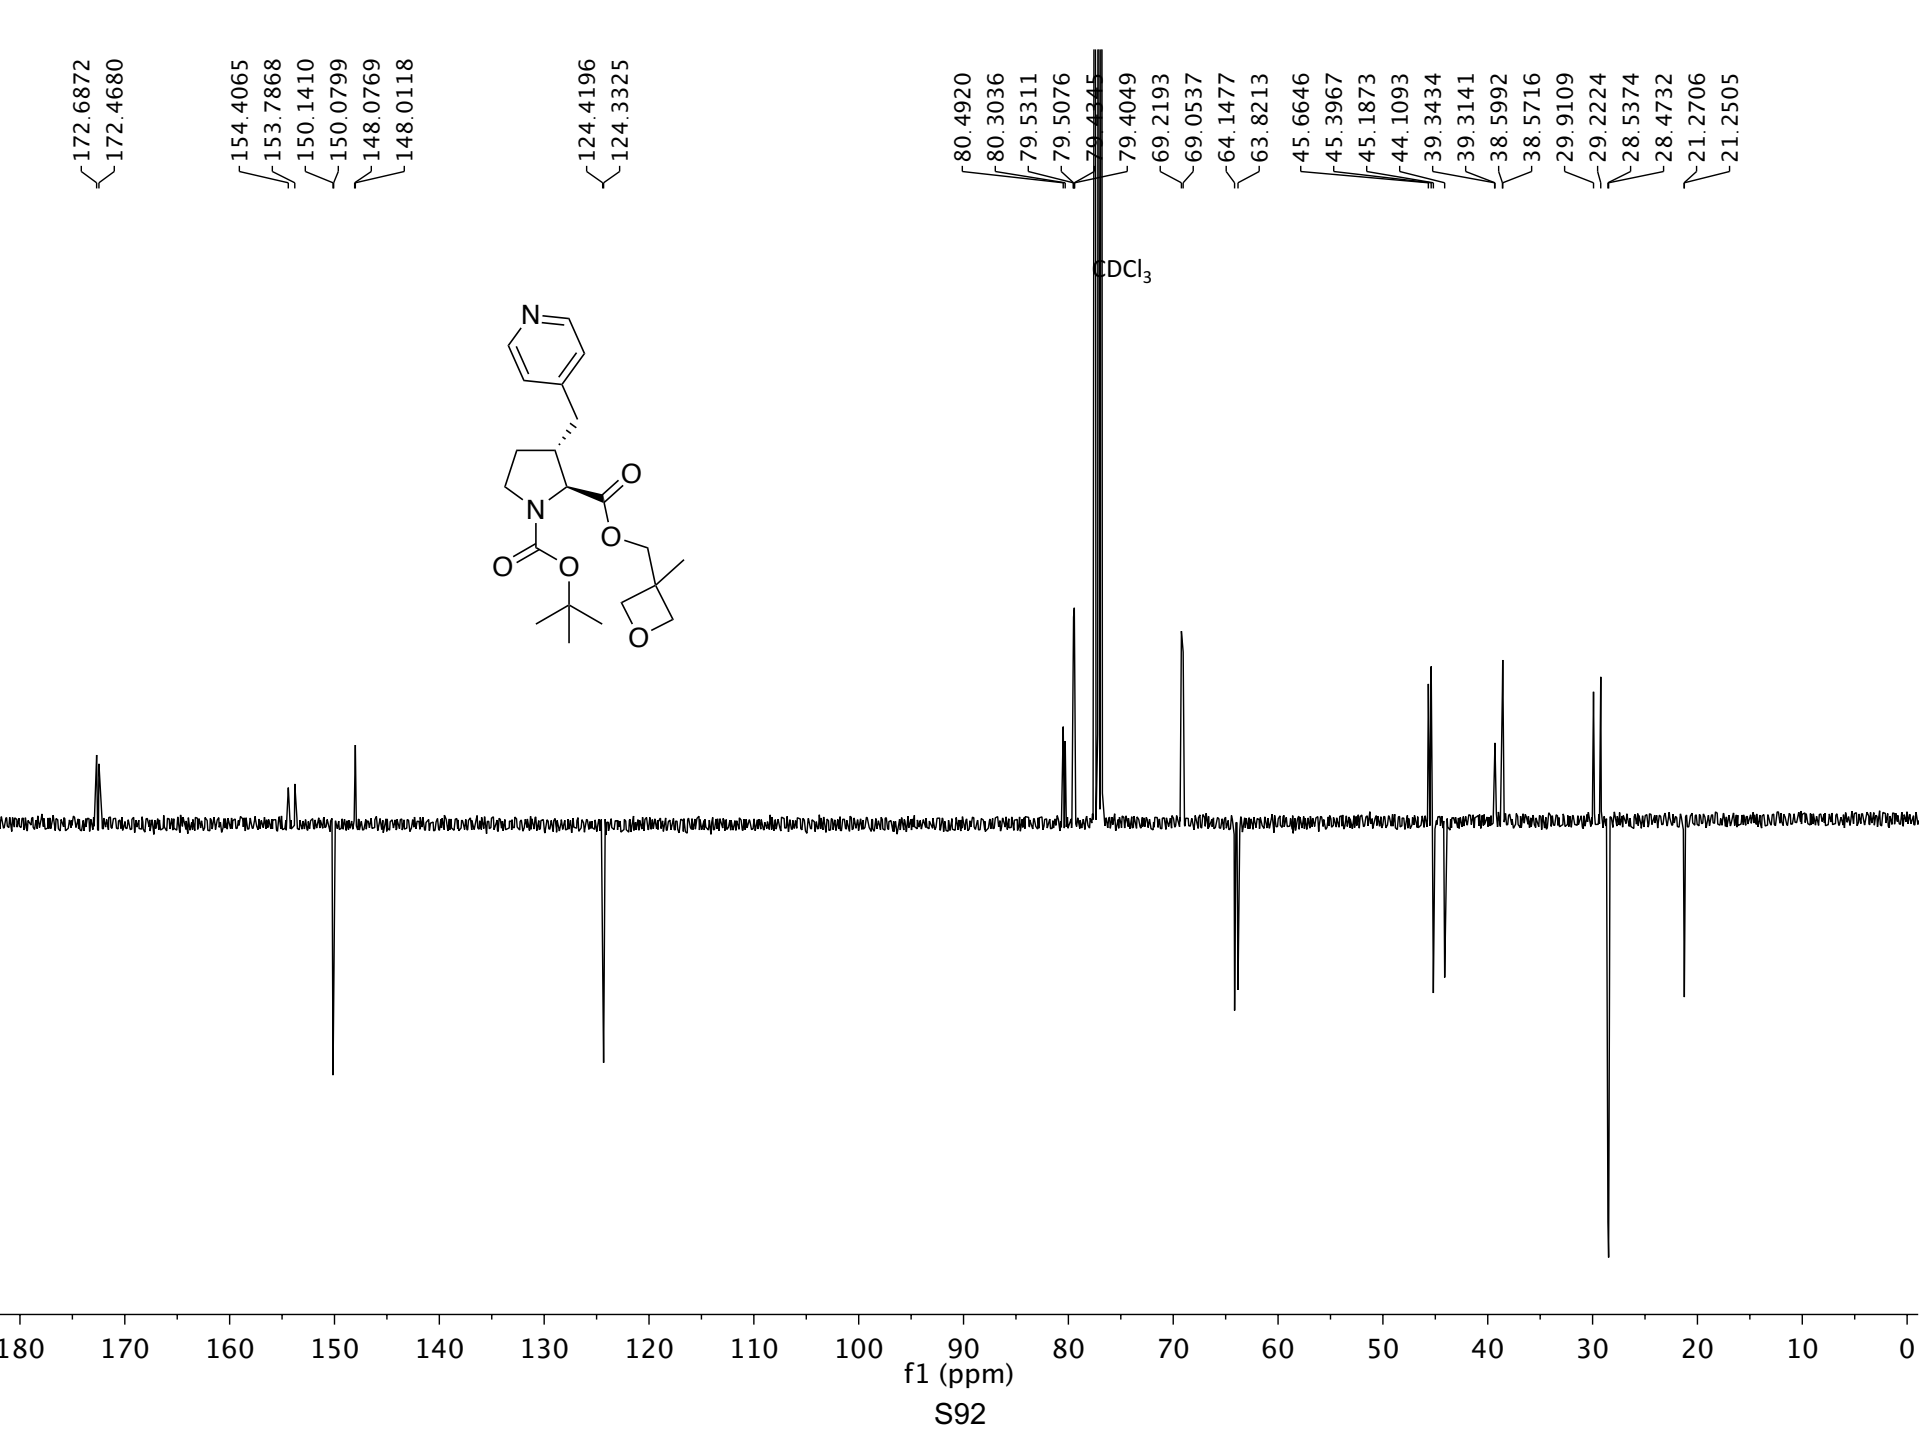

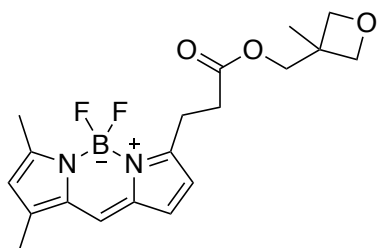

7.2603  
7.0804  
6.8802  
6.8735

6.2702  
6.2635  
6.1153

4.4836  
4.4736  
4.3561  
4.3461  
4.1958

3.3202  
3.3078  
3.2953

2.8308  
2.8183  
2.8059  
2.5650

2.2510

1.3058

CDCl<sub>3</sub>

0.98

0.98

0.96

0.96

1.99

2.01

2.00

2.07

2.00

3.04

3.08

3.15

8.0 7.5 7.0 6.5 6.0 5.5 5.0 4.5 4.0 3.5 3.0 2.5 2.0 1.5 1.0 0.5 0.0

f1 (ppm)

S93

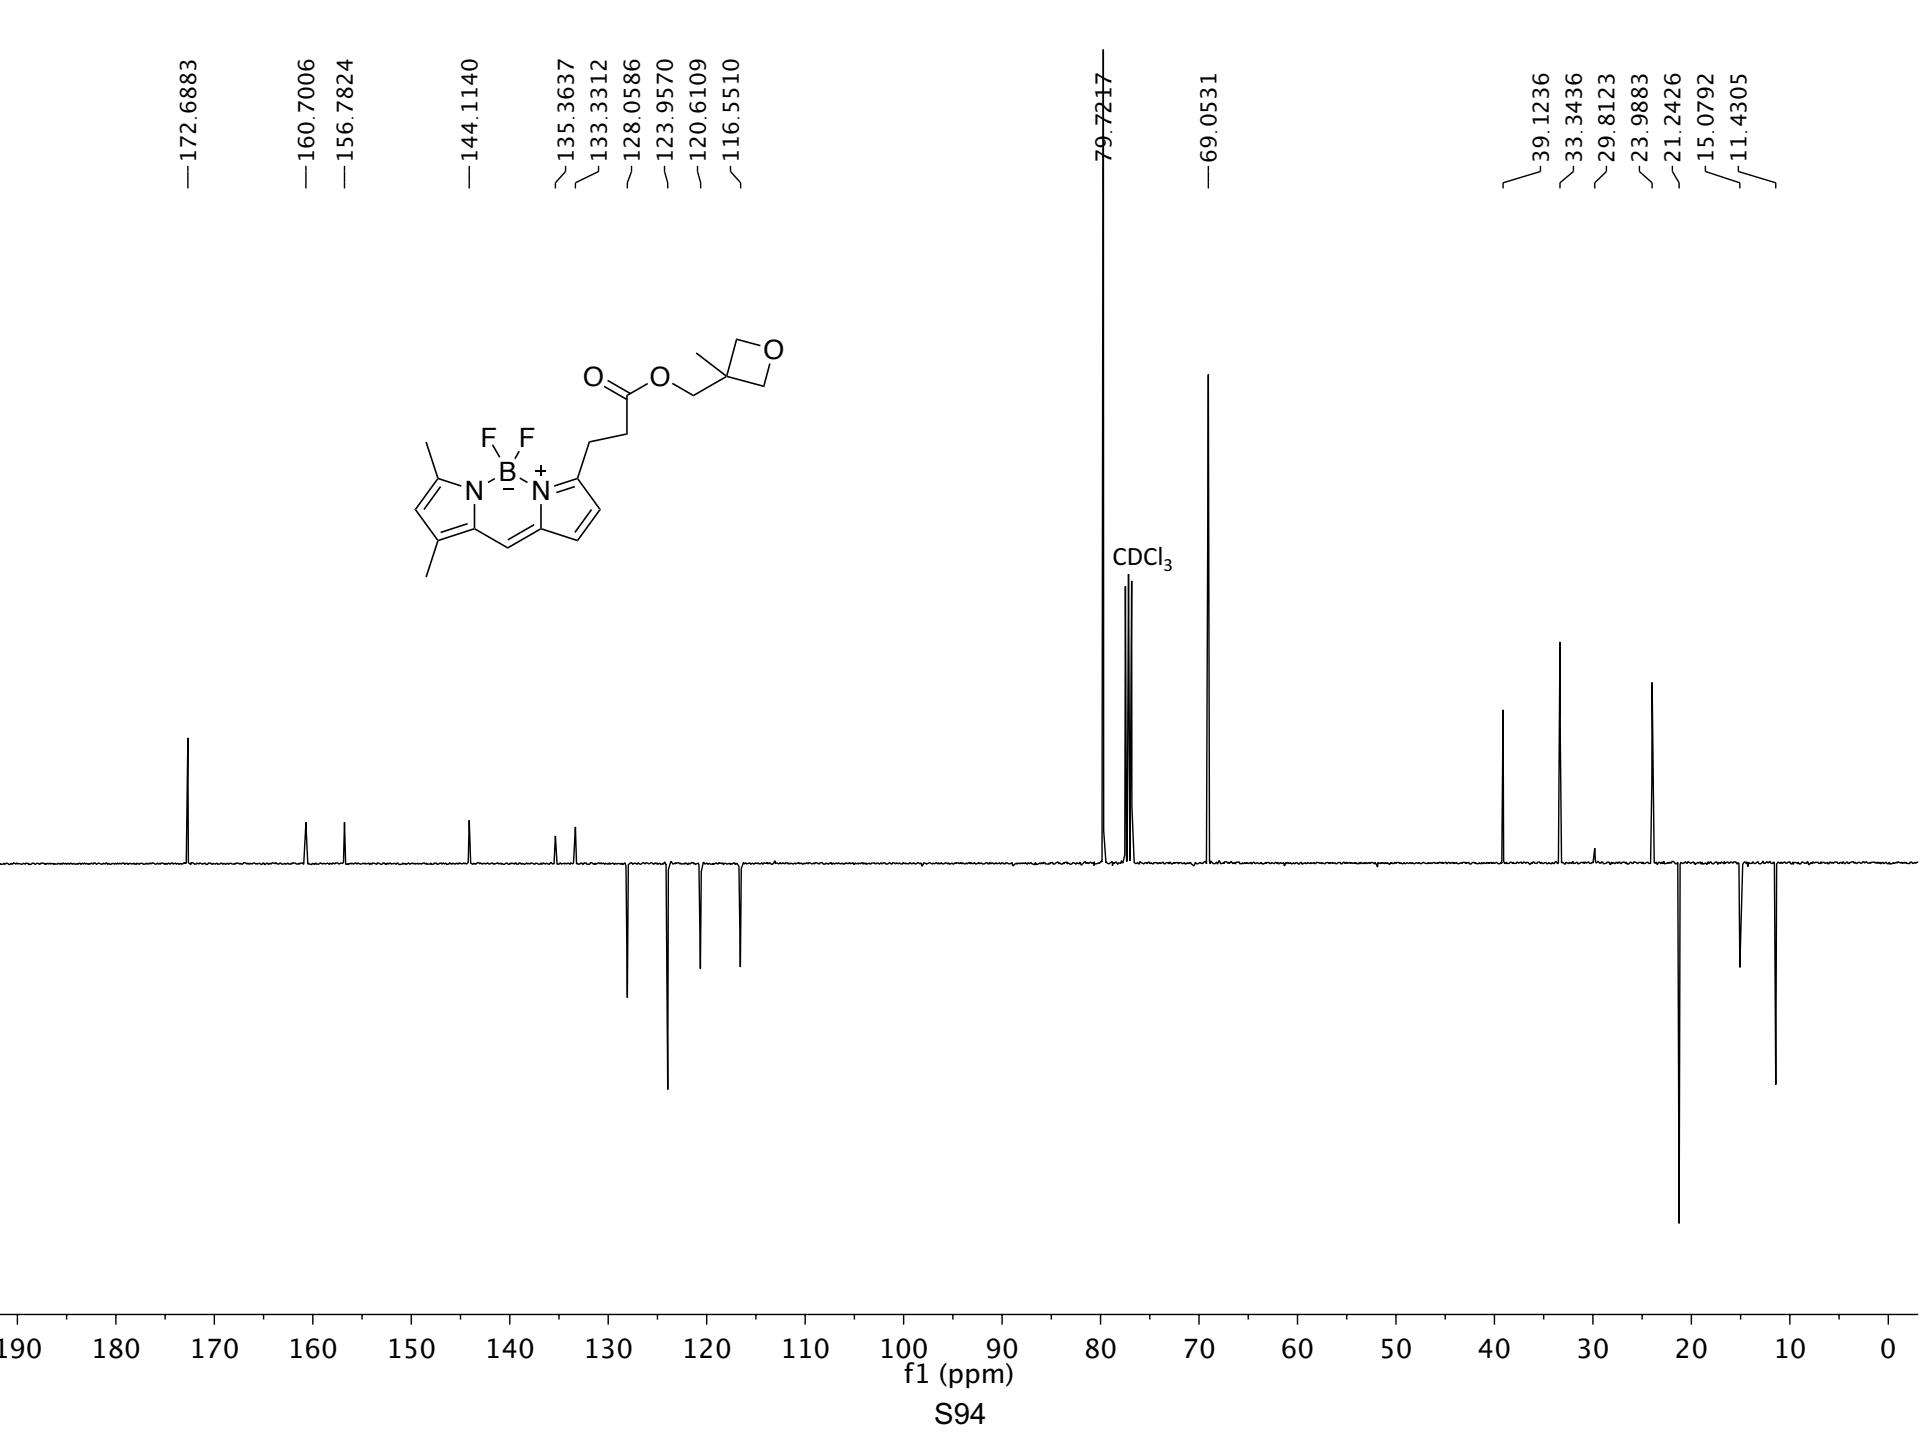

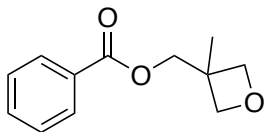

8.0698  
8.0664  
8.0627  
8.0540  
8.0491  
8.0453  
7.6455  
7.6276  
7.5994  
7.5960  
7.5894  
7.5860  
7.5827  
7.5724  
7.5674  
7.5627  
7.5524  
7.5489  
7.5455  
7.5377  
7.4680  
7.4637  
7.4596  
7.4472  
7.4438  
7.4400  
7.4296  
7.4255  
7.4236  
7.4212  
7.4132  
7.4030  
7.3990

4.6533  
4.6383  
4.4665  
4.4516  
4.3899

1.4221

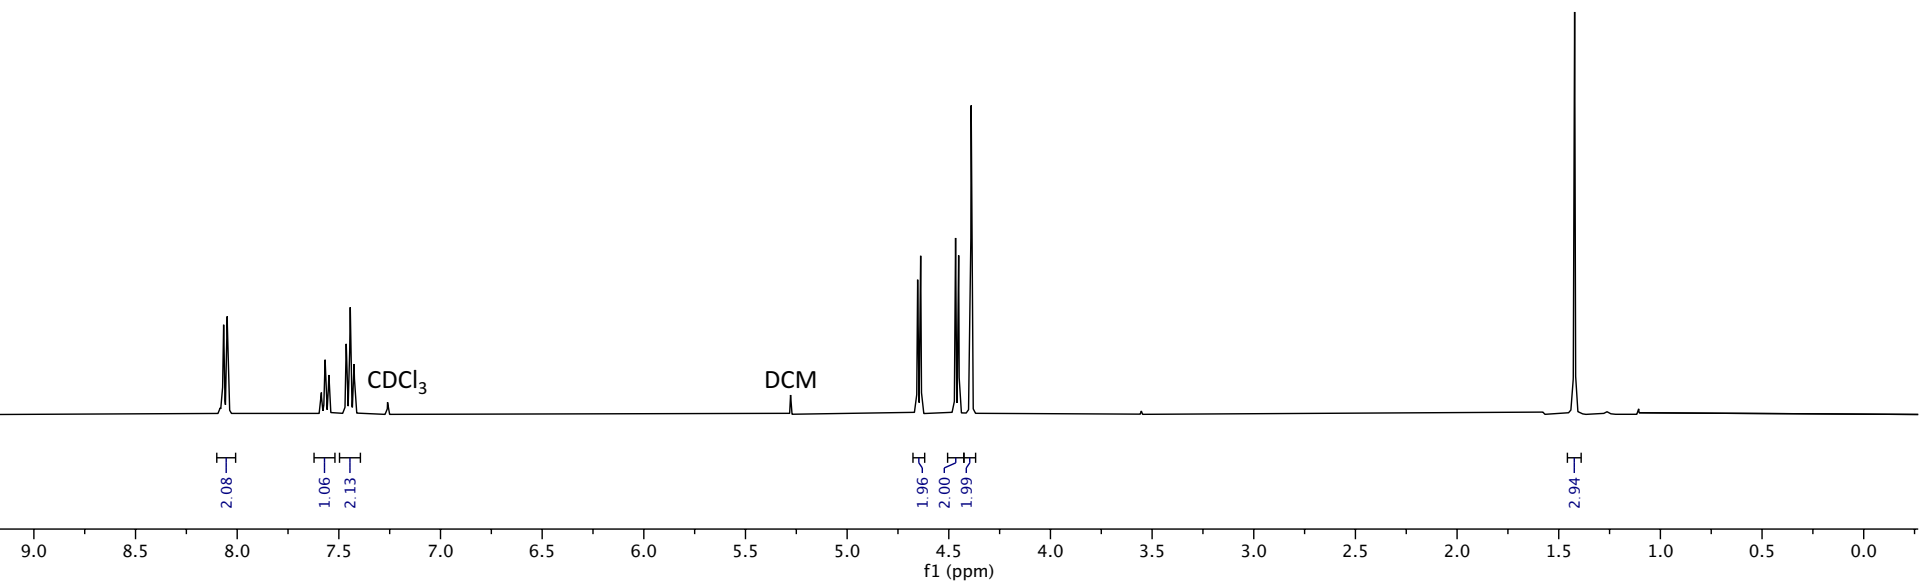

S95

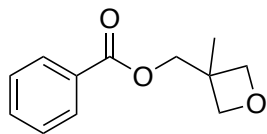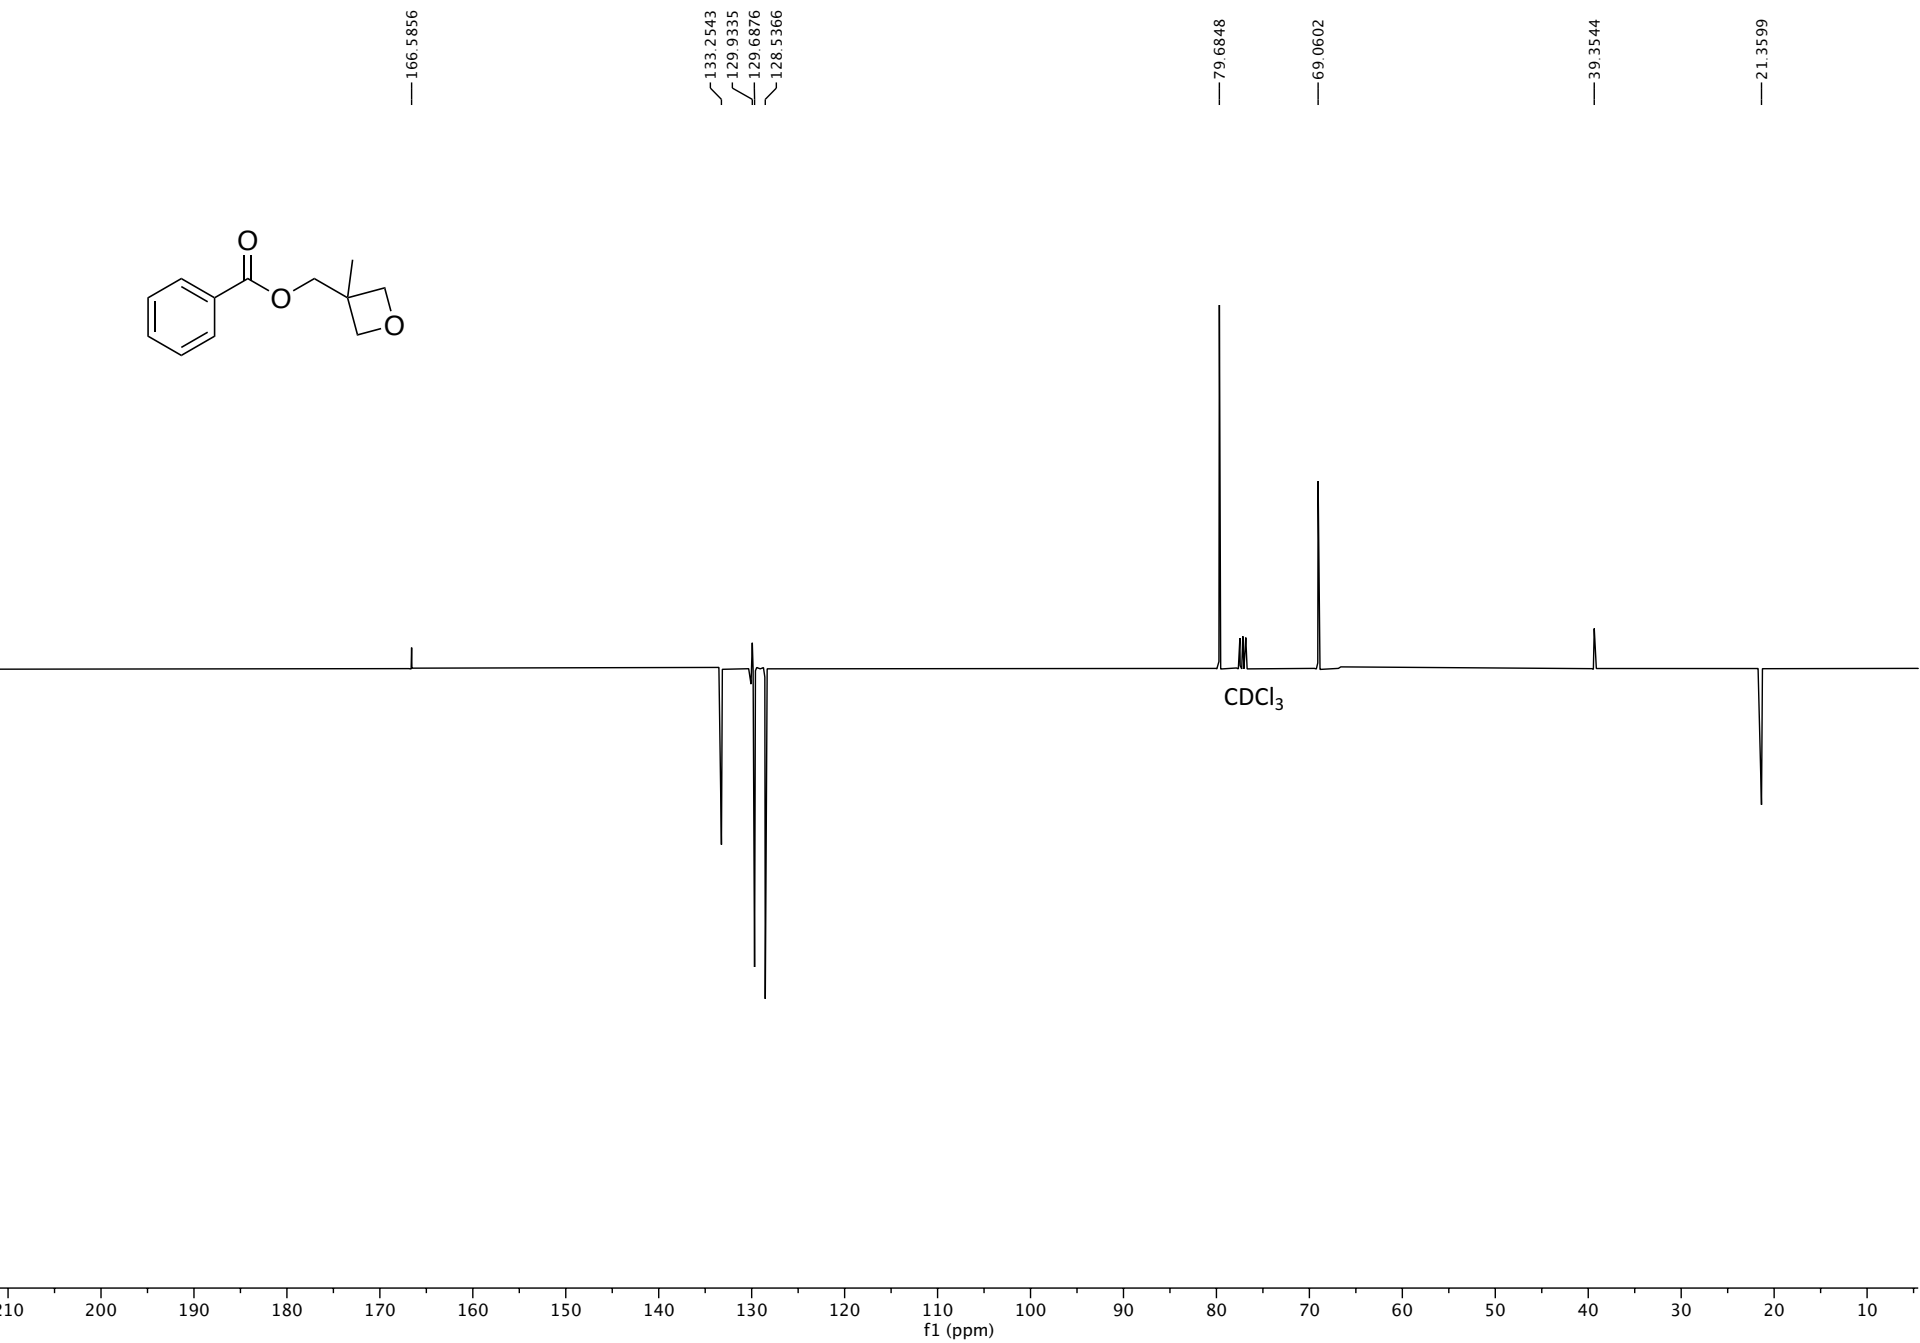



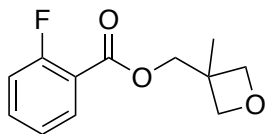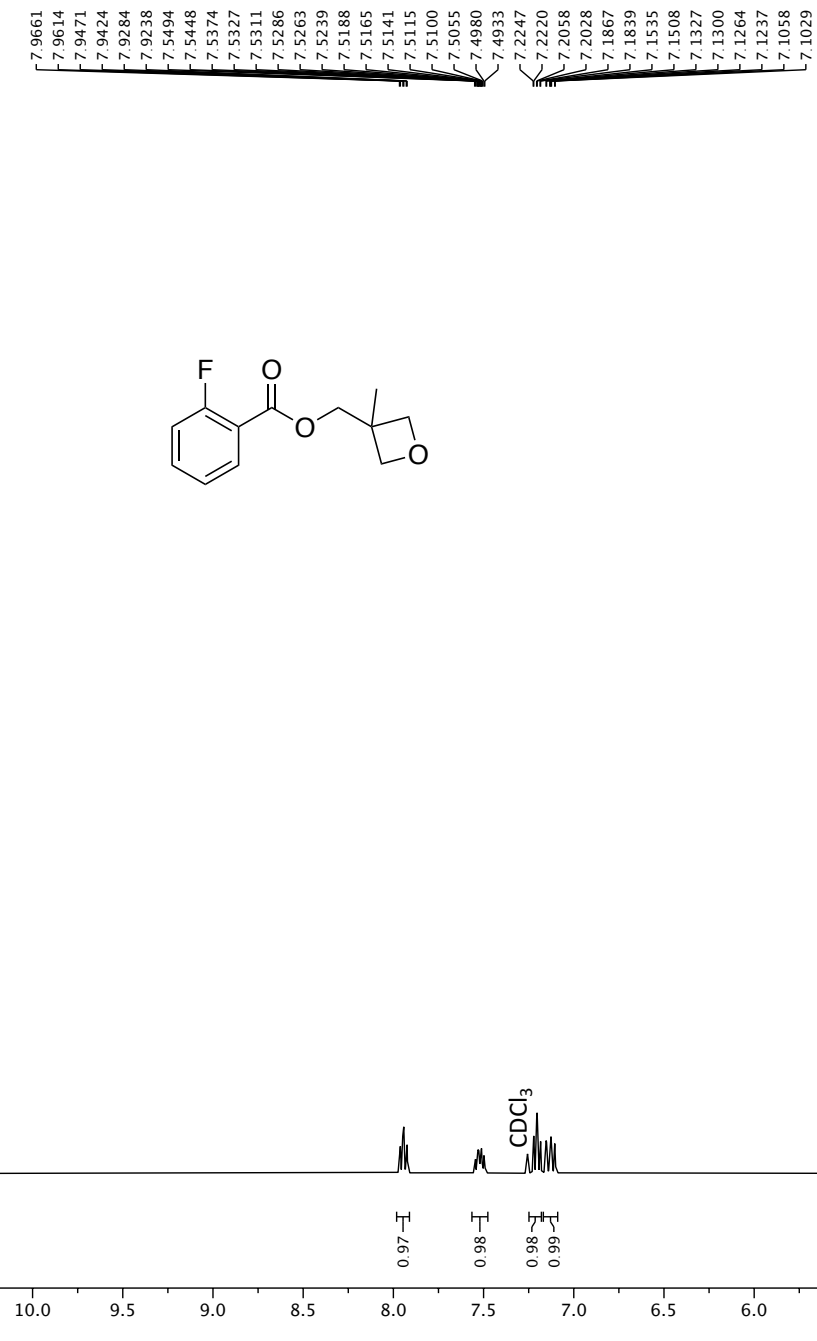

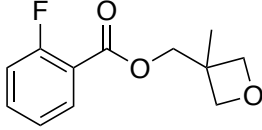

164.6267  
164.5881  
163.3975  
160.8107

134.8626  
134.7724  
132.2378

124.1192  
118.5471  
118.4477  
117.2730  
117.0497

79.6684

69.5793

39.2978

21.3231

CDCl<sub>3</sub>

200 190 180 170 160 150 140 130 120 110 100 90 80 70 60 50 40 30 20 10 0

f1 (ppm)

S98

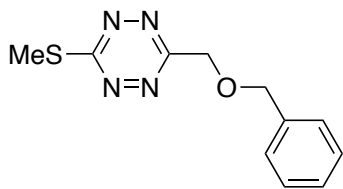

7.4028  
7.3978  
7.3931  
7.3858  
7.3816  
7.3776  
7.3736  
7.3708  
7.3657  
7.3542  
7.3489  
7.3391  
7.3351  
7.3257  
7.3208  
7.3157  
7.3117  
7.3039  
7.2954  
7.2907  
7.2866  
7.2822

5.0509  
4.7719

2.7432

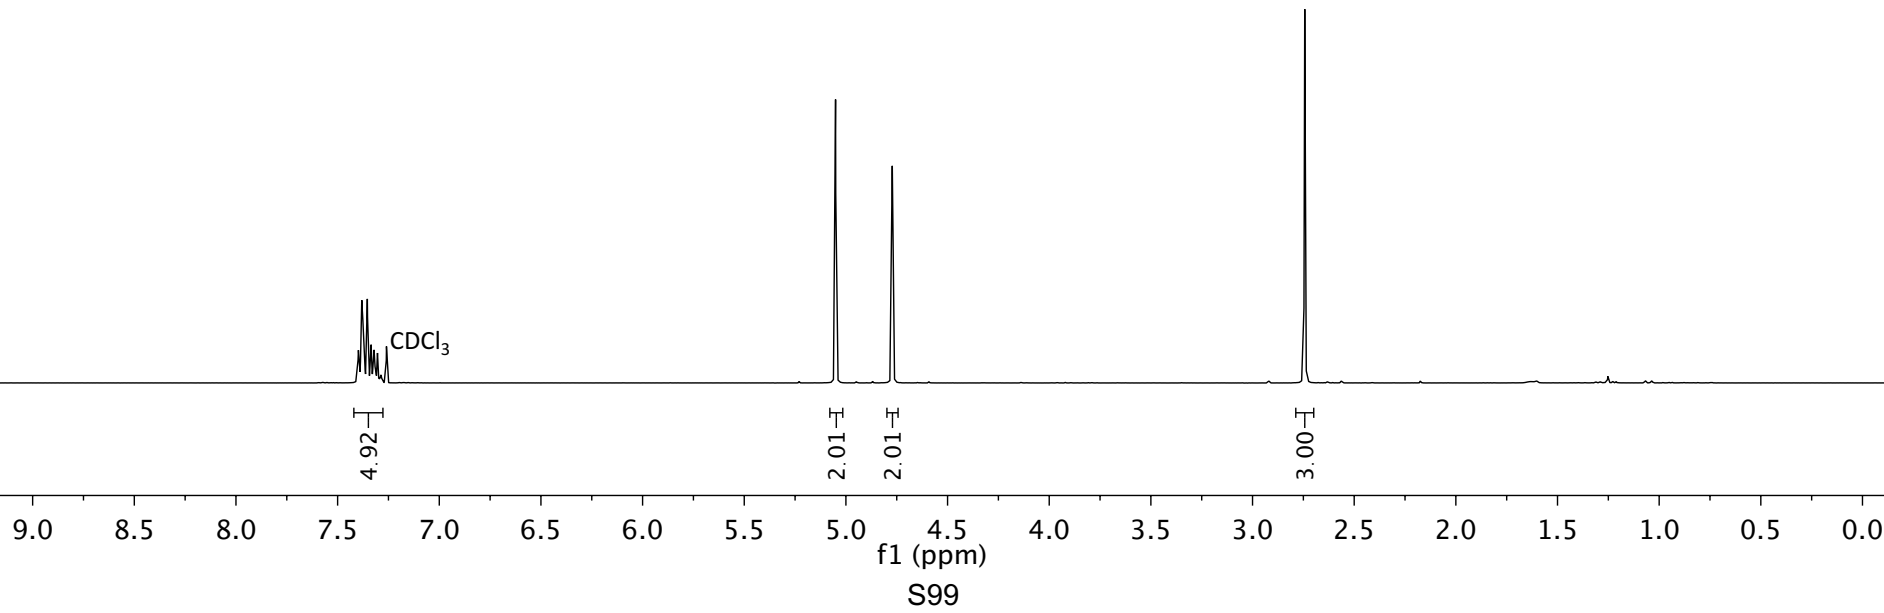

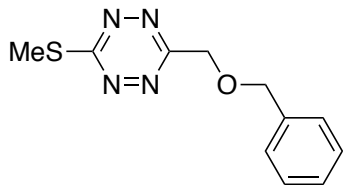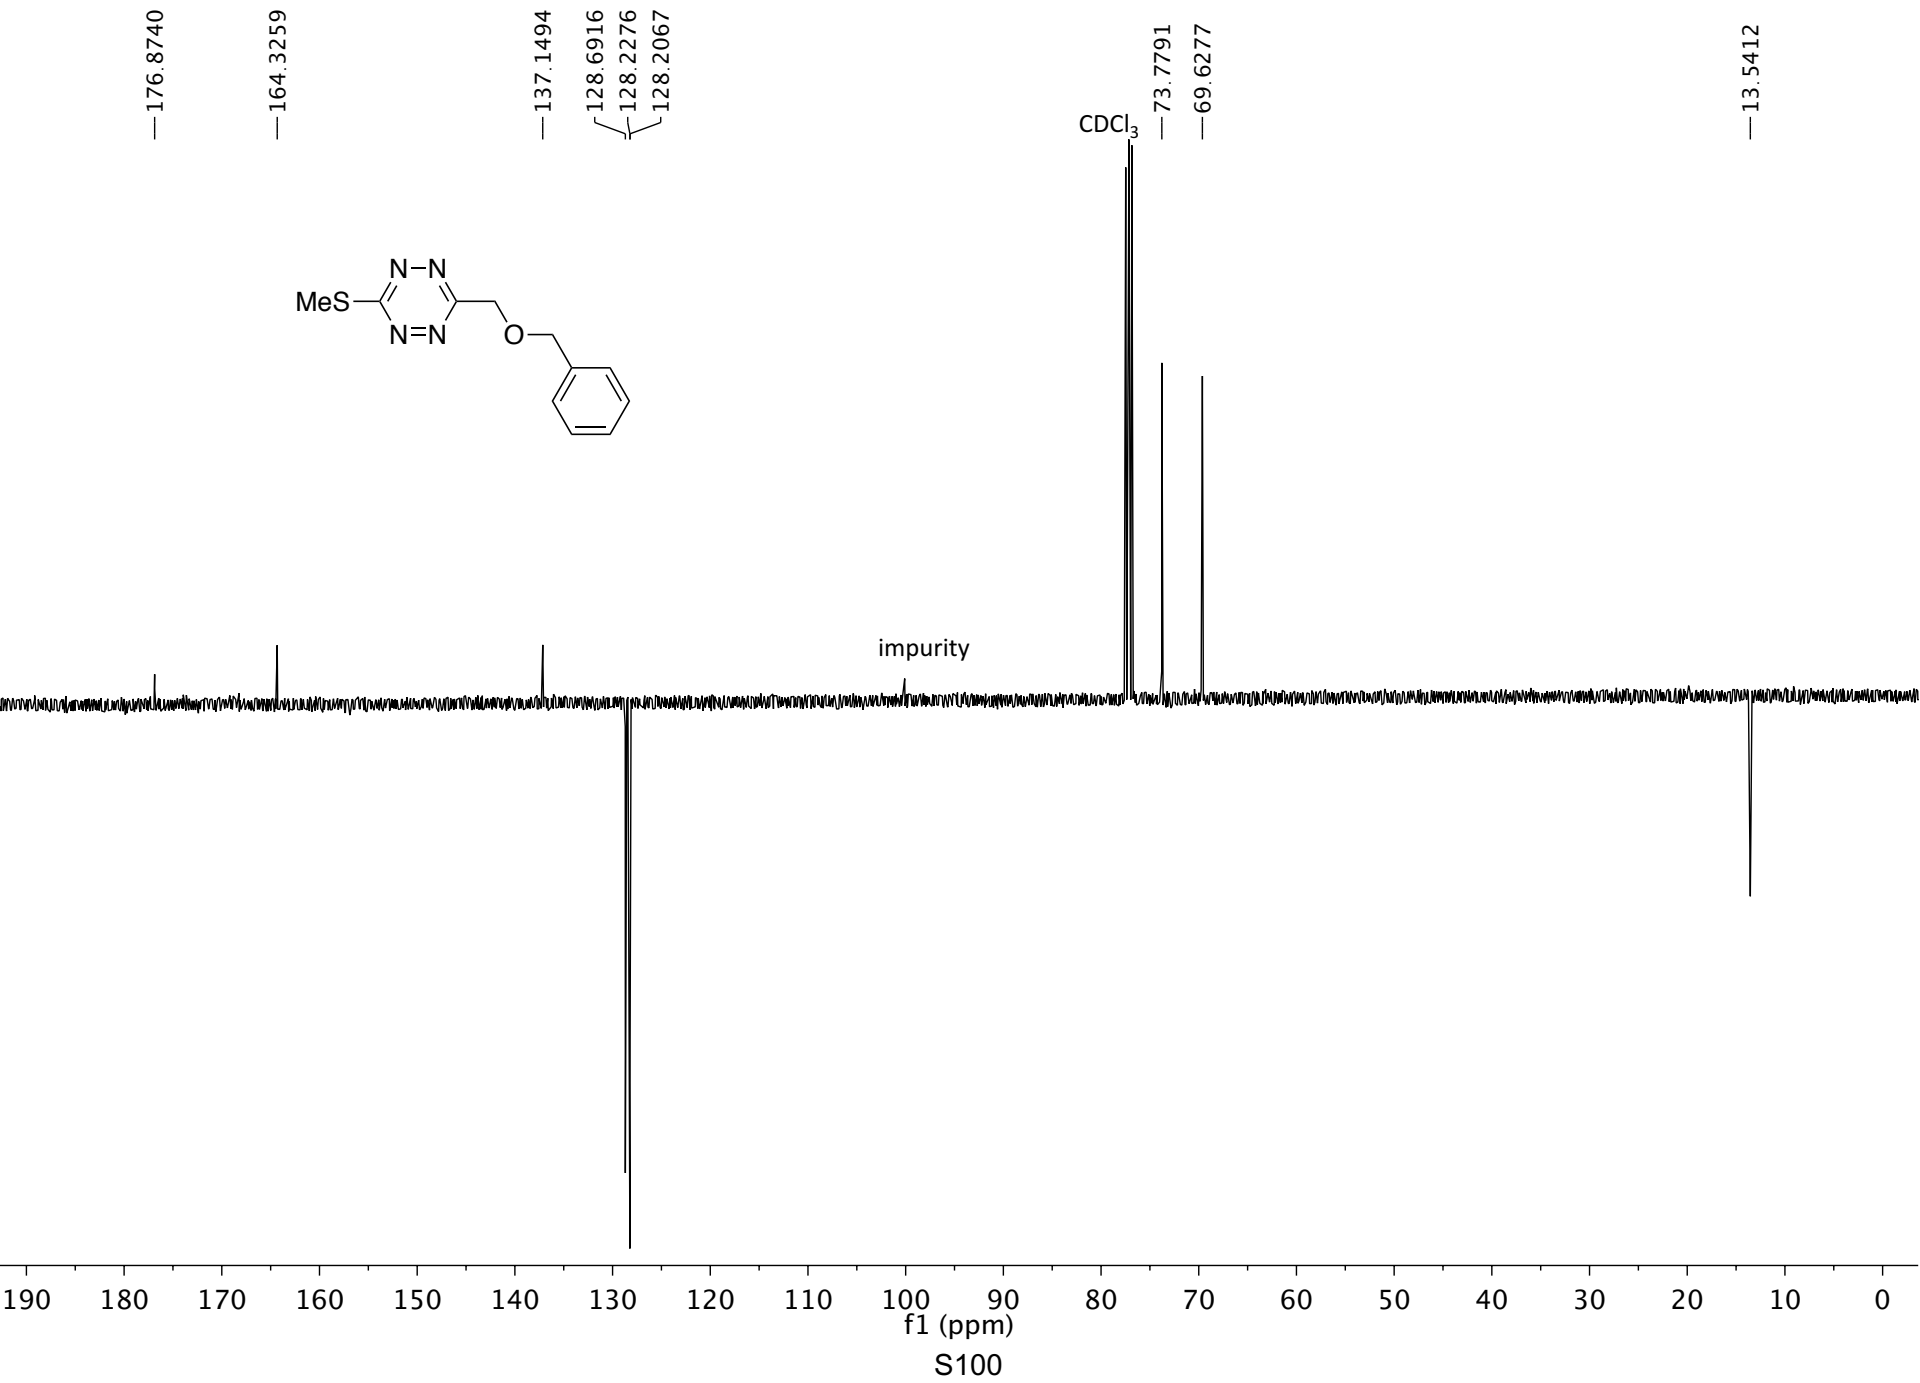

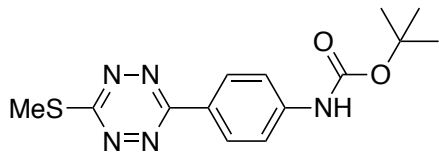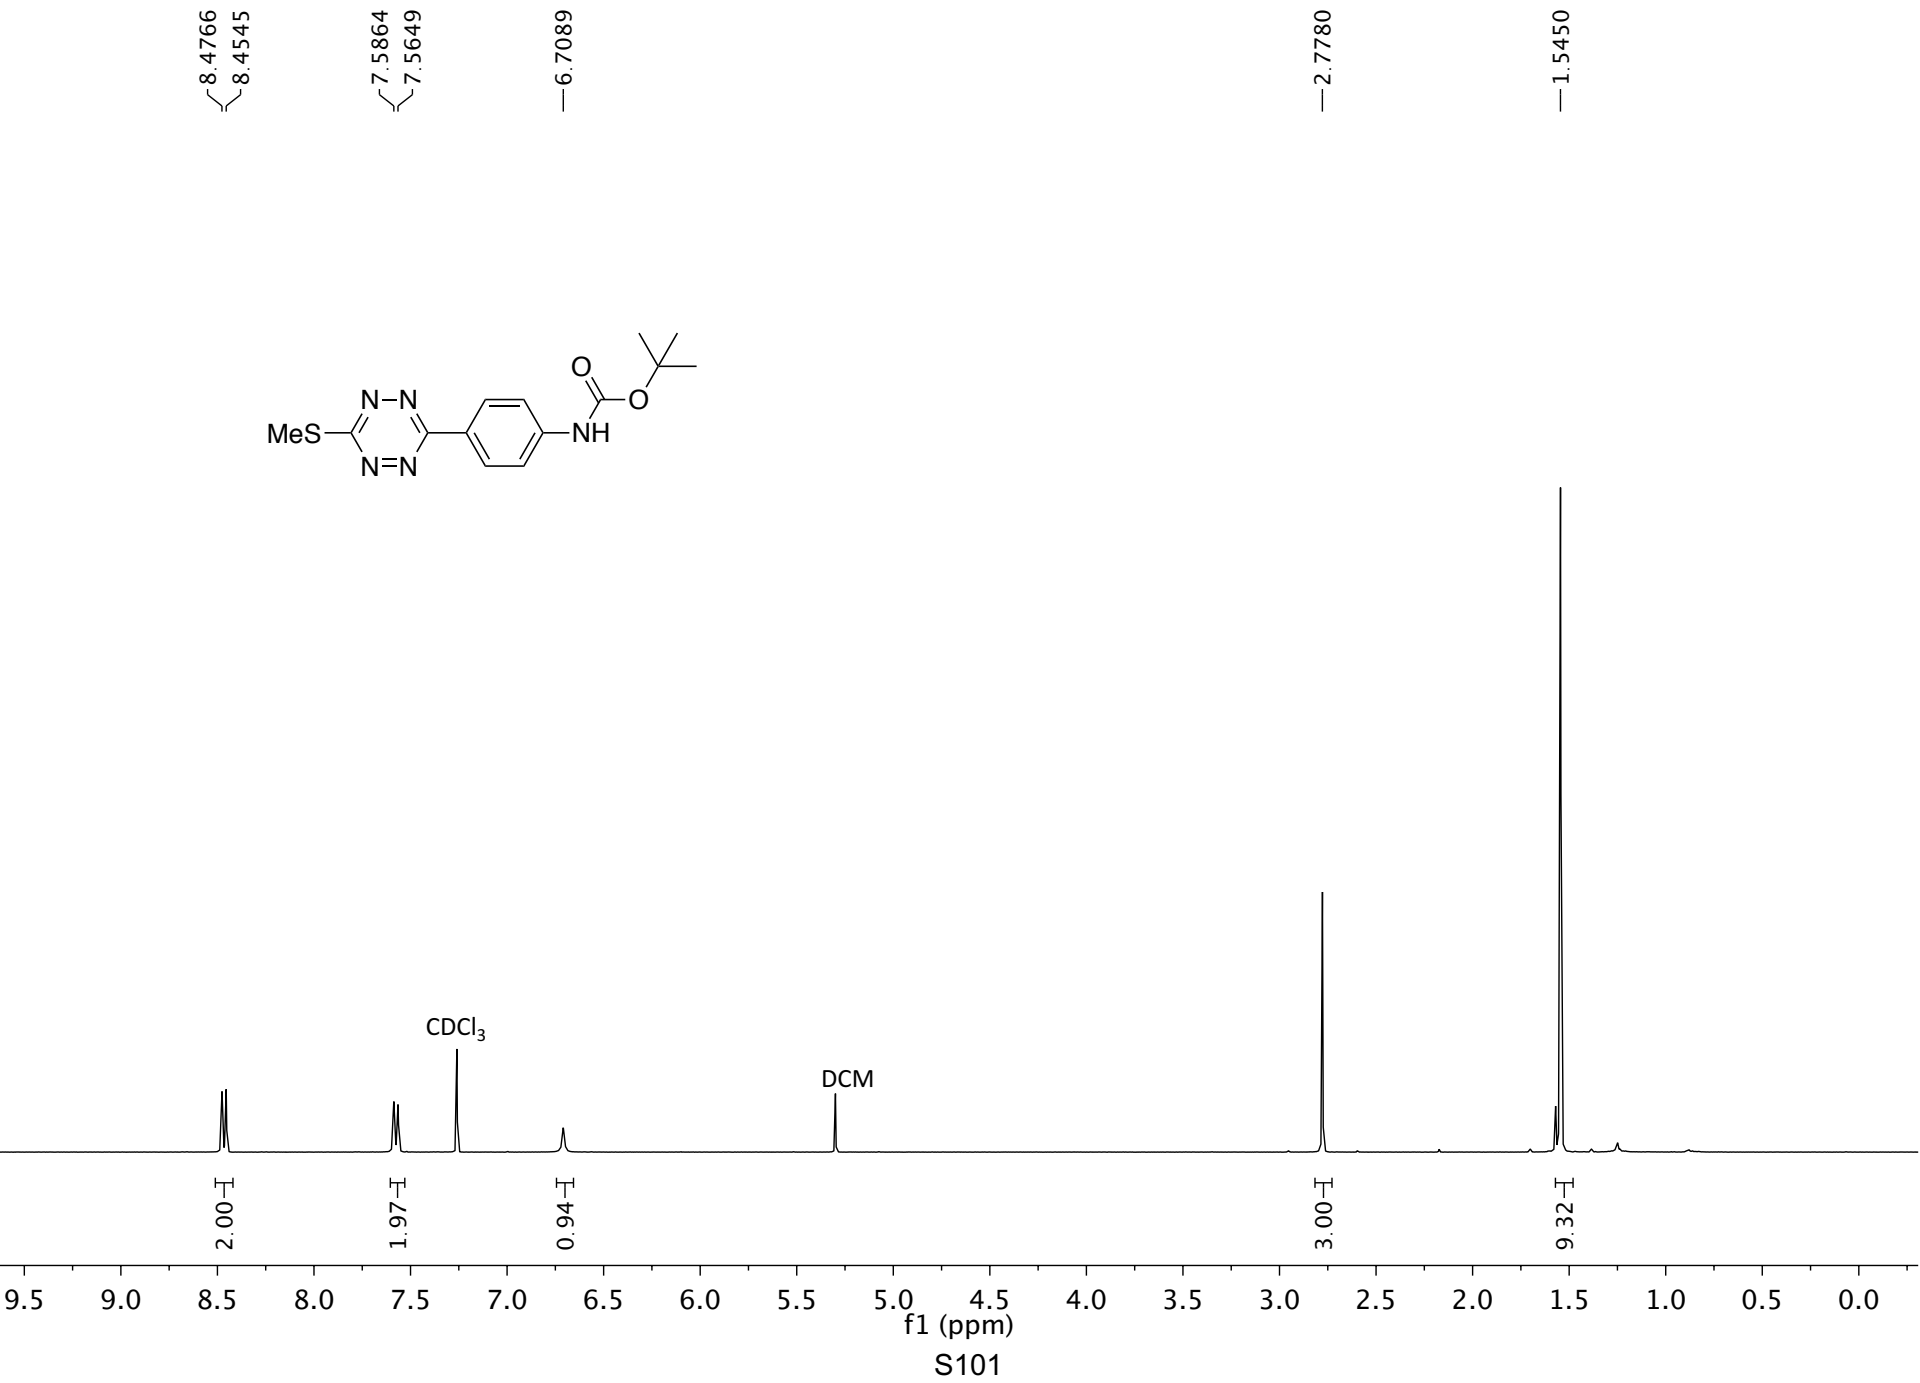

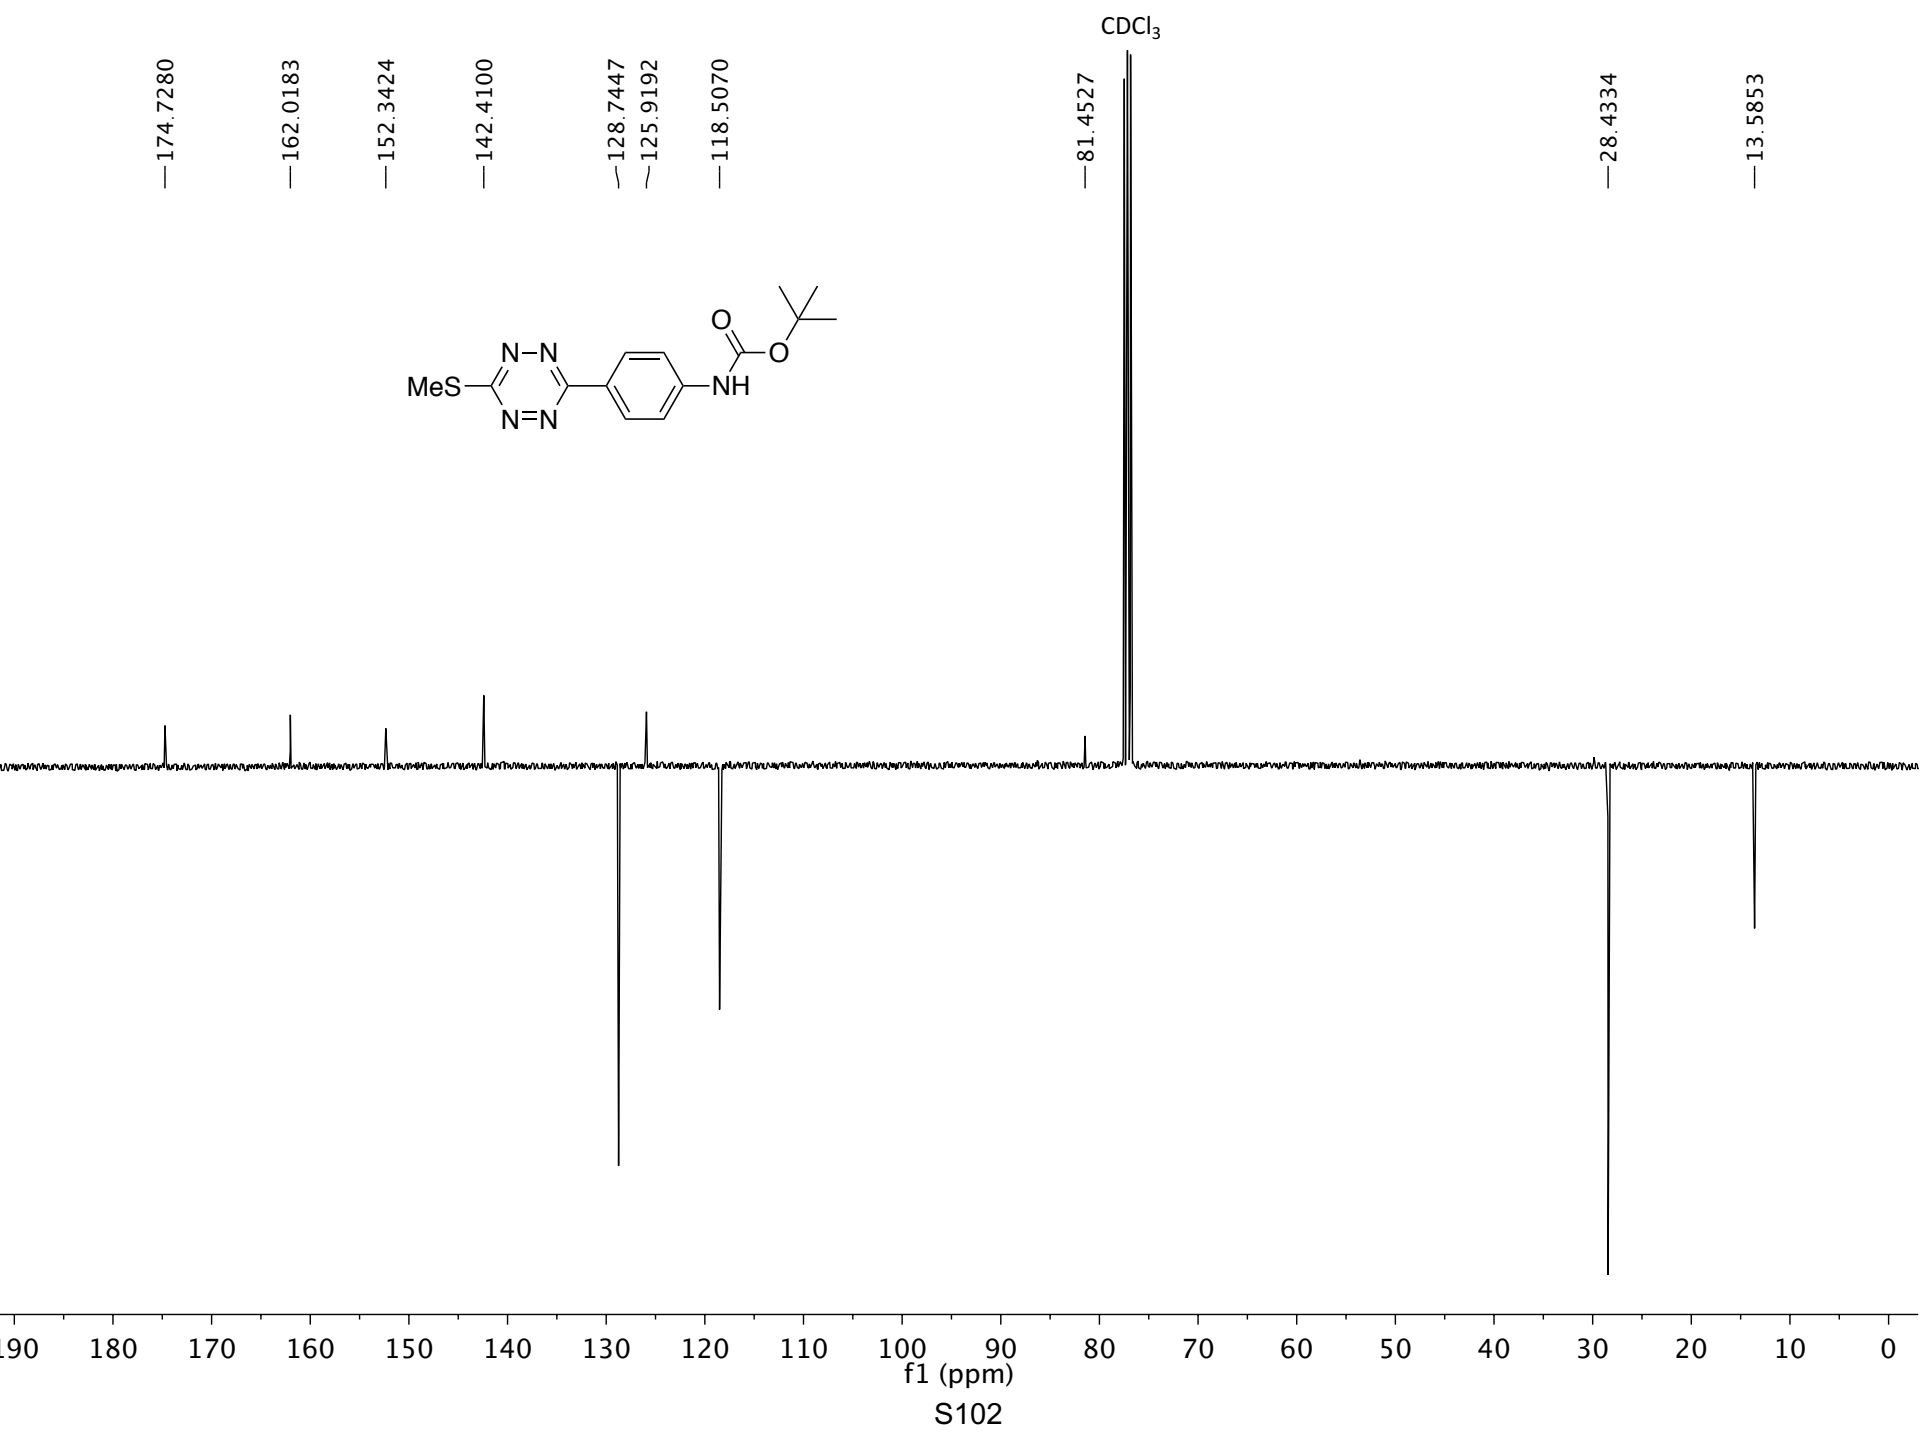

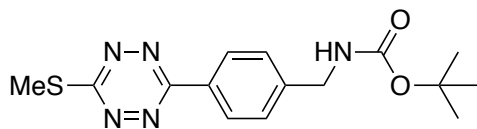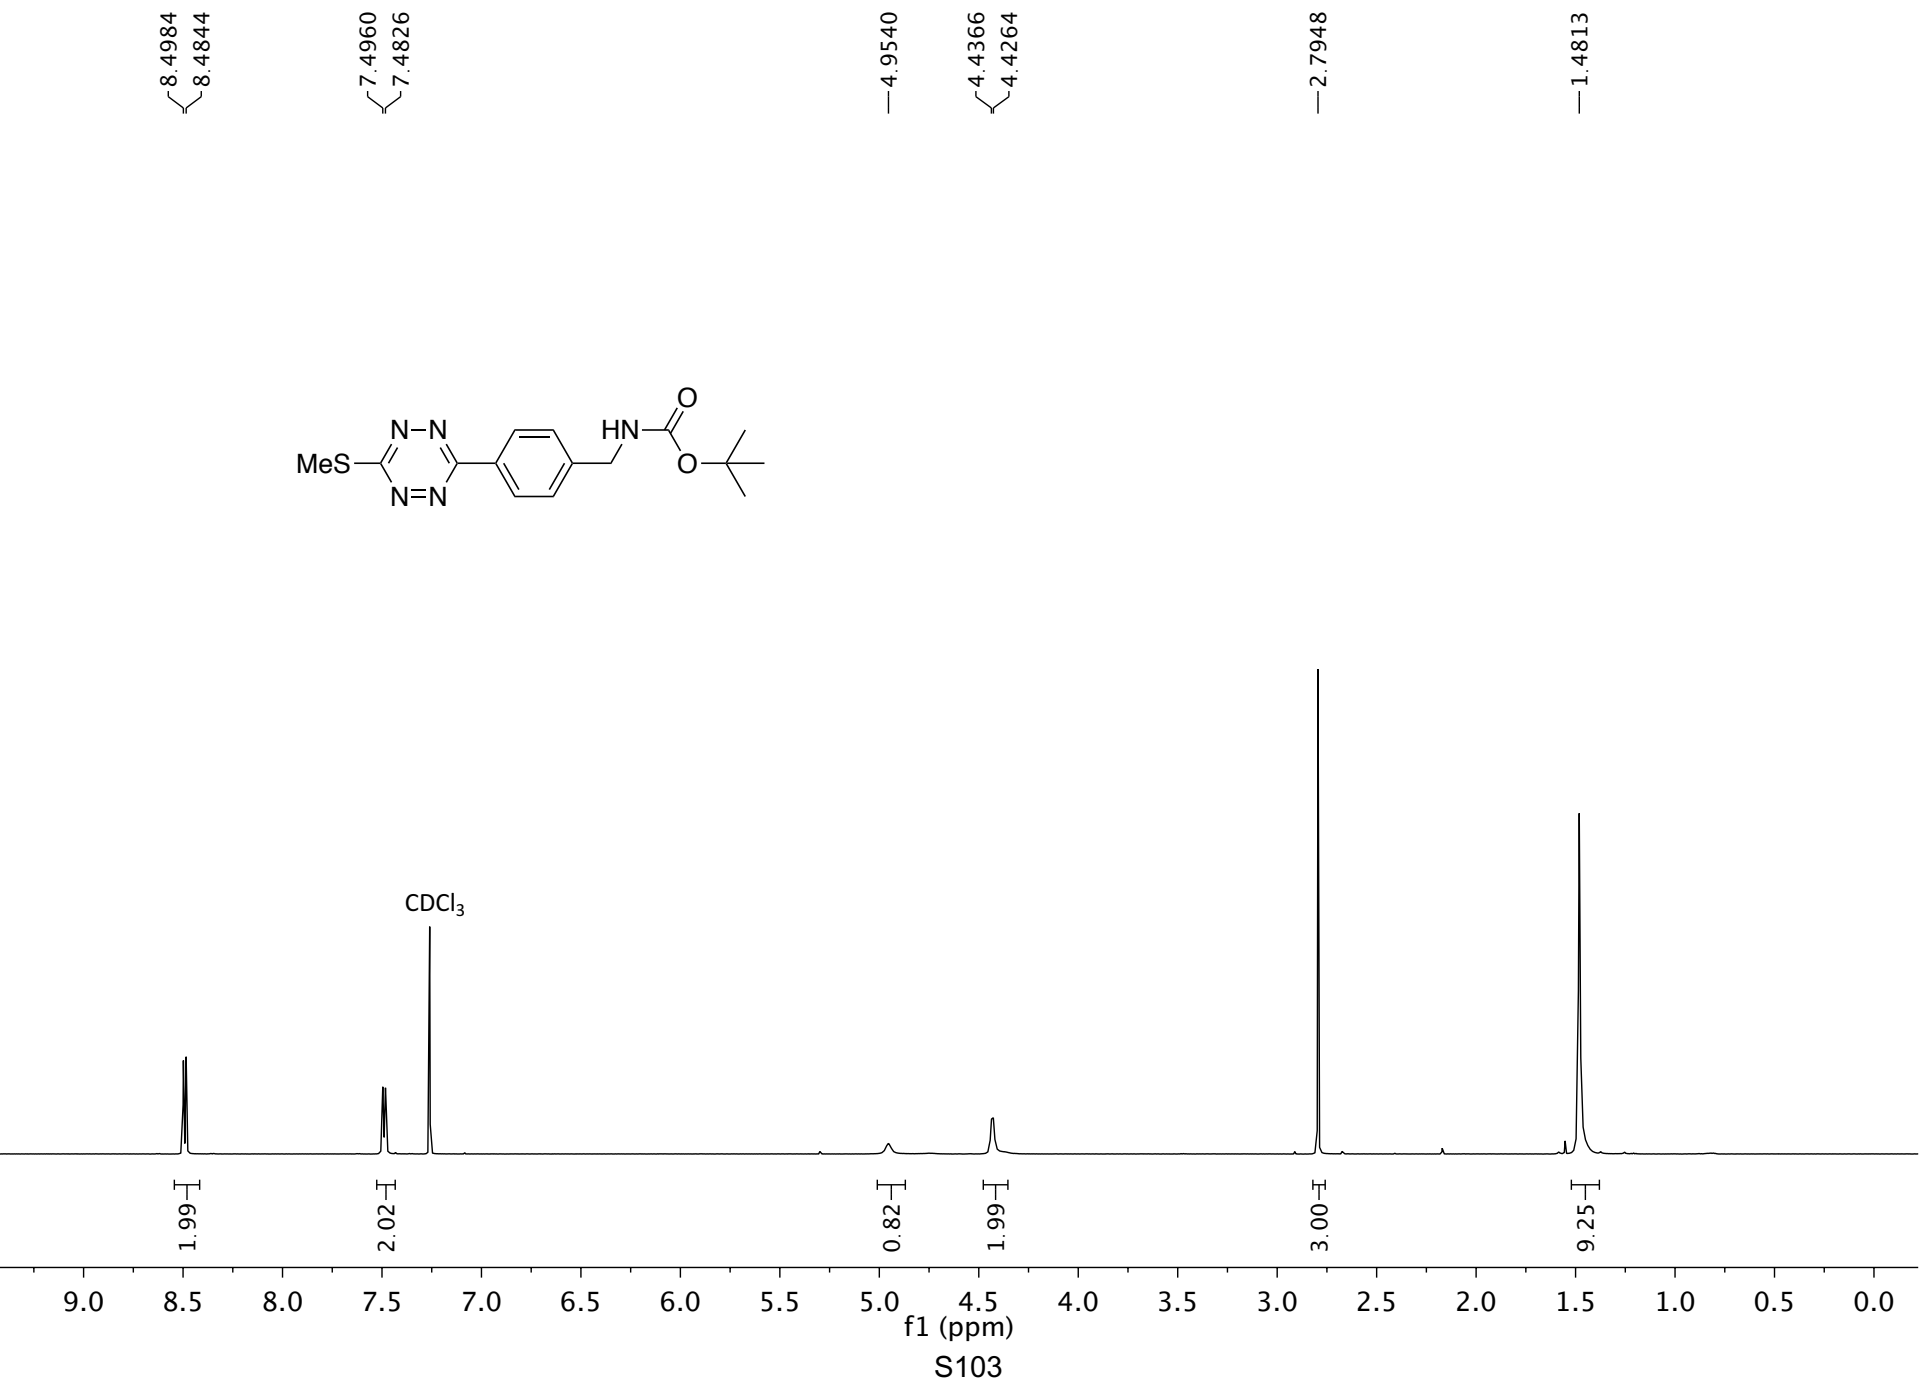

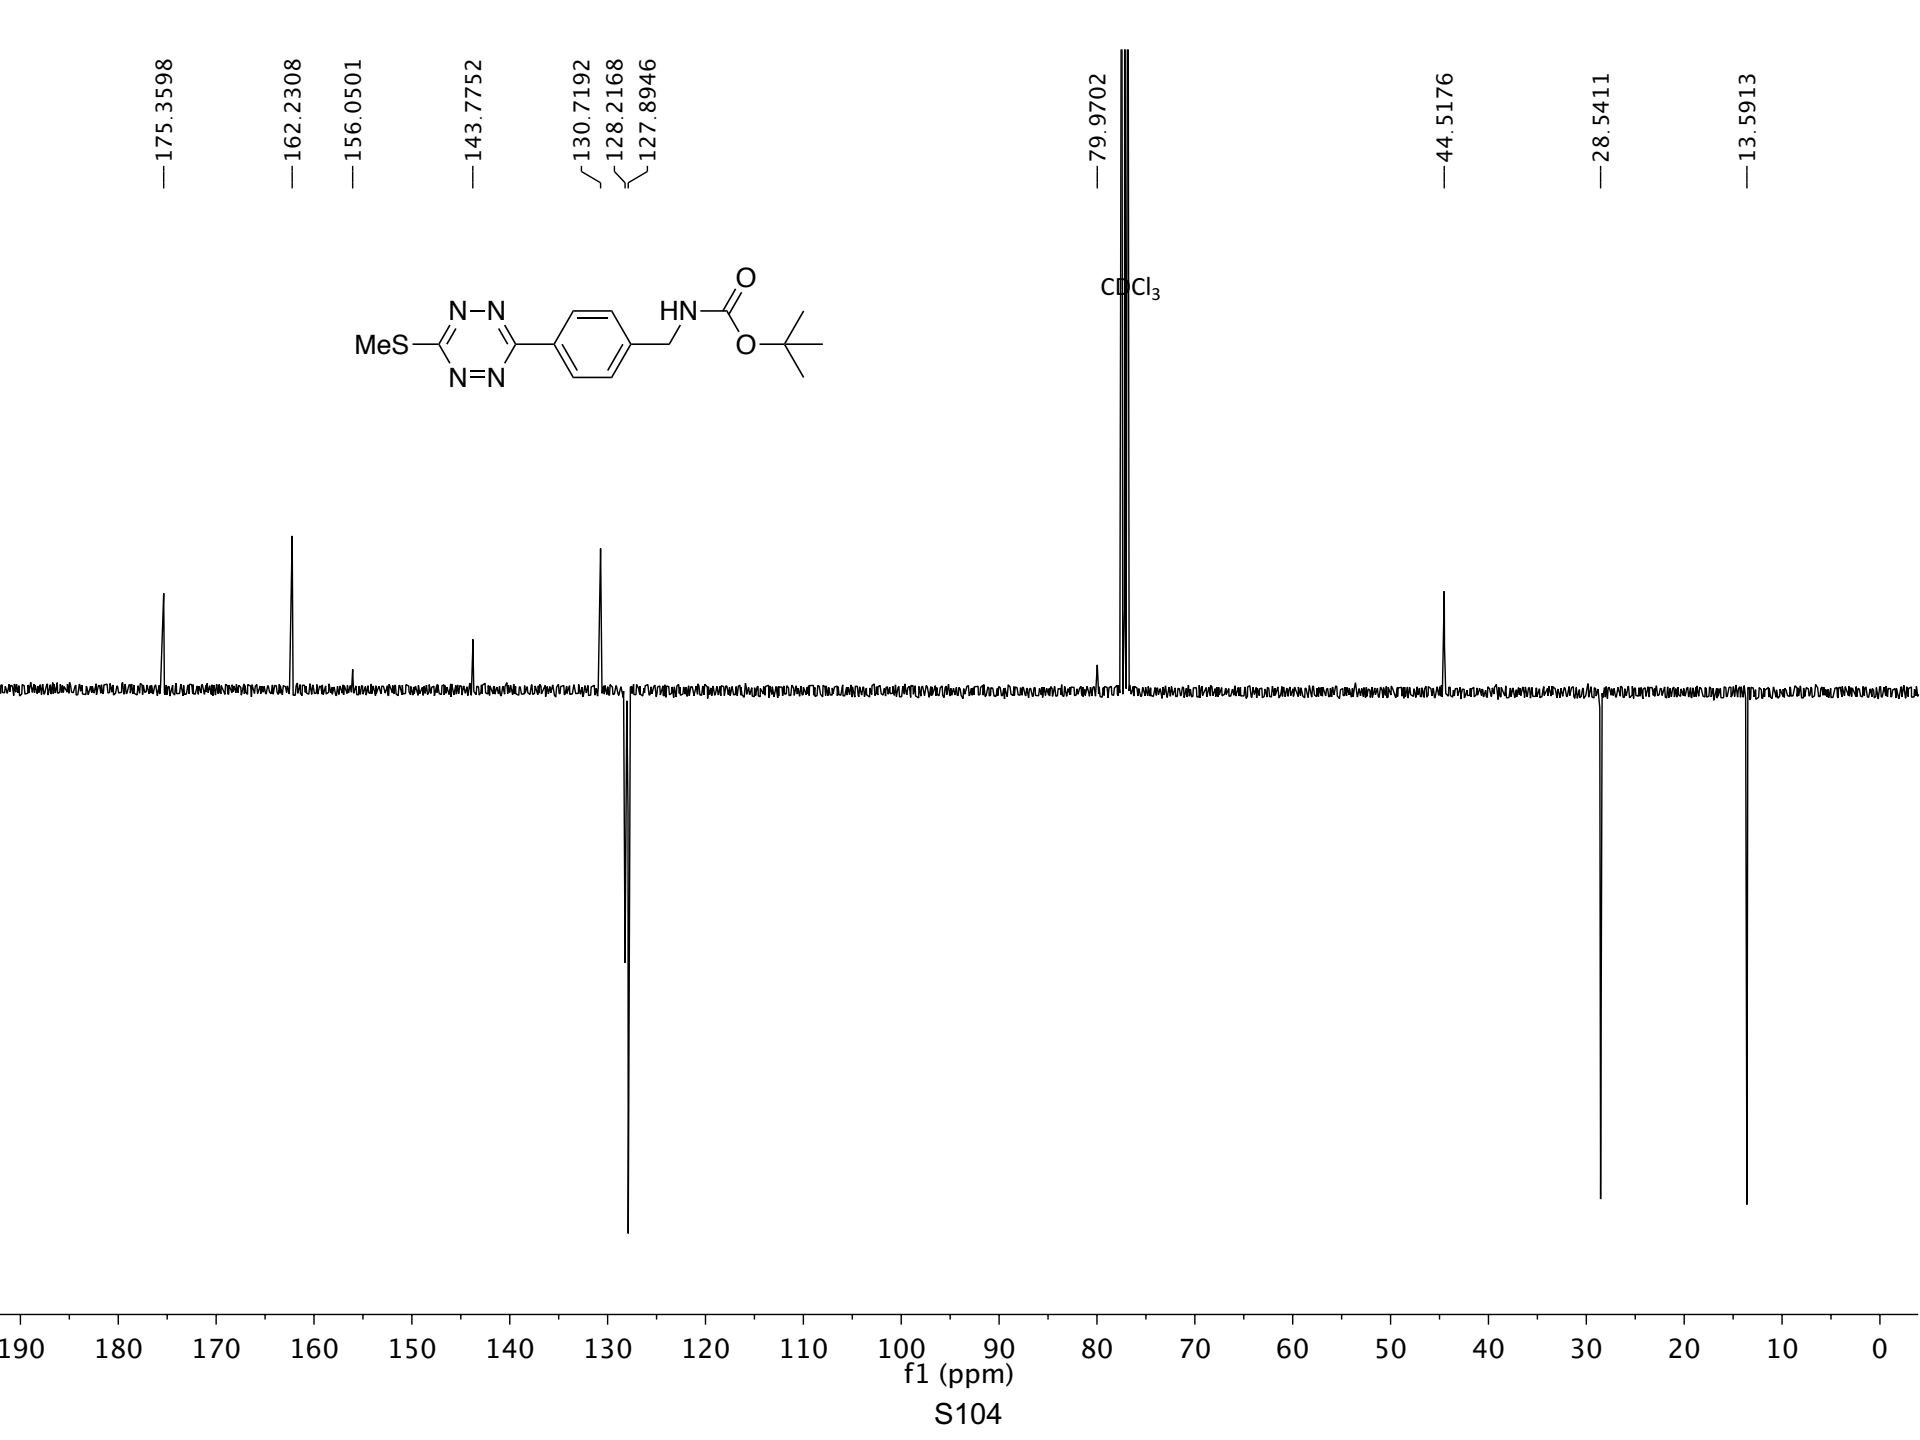



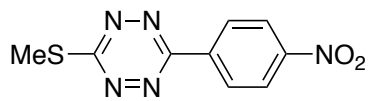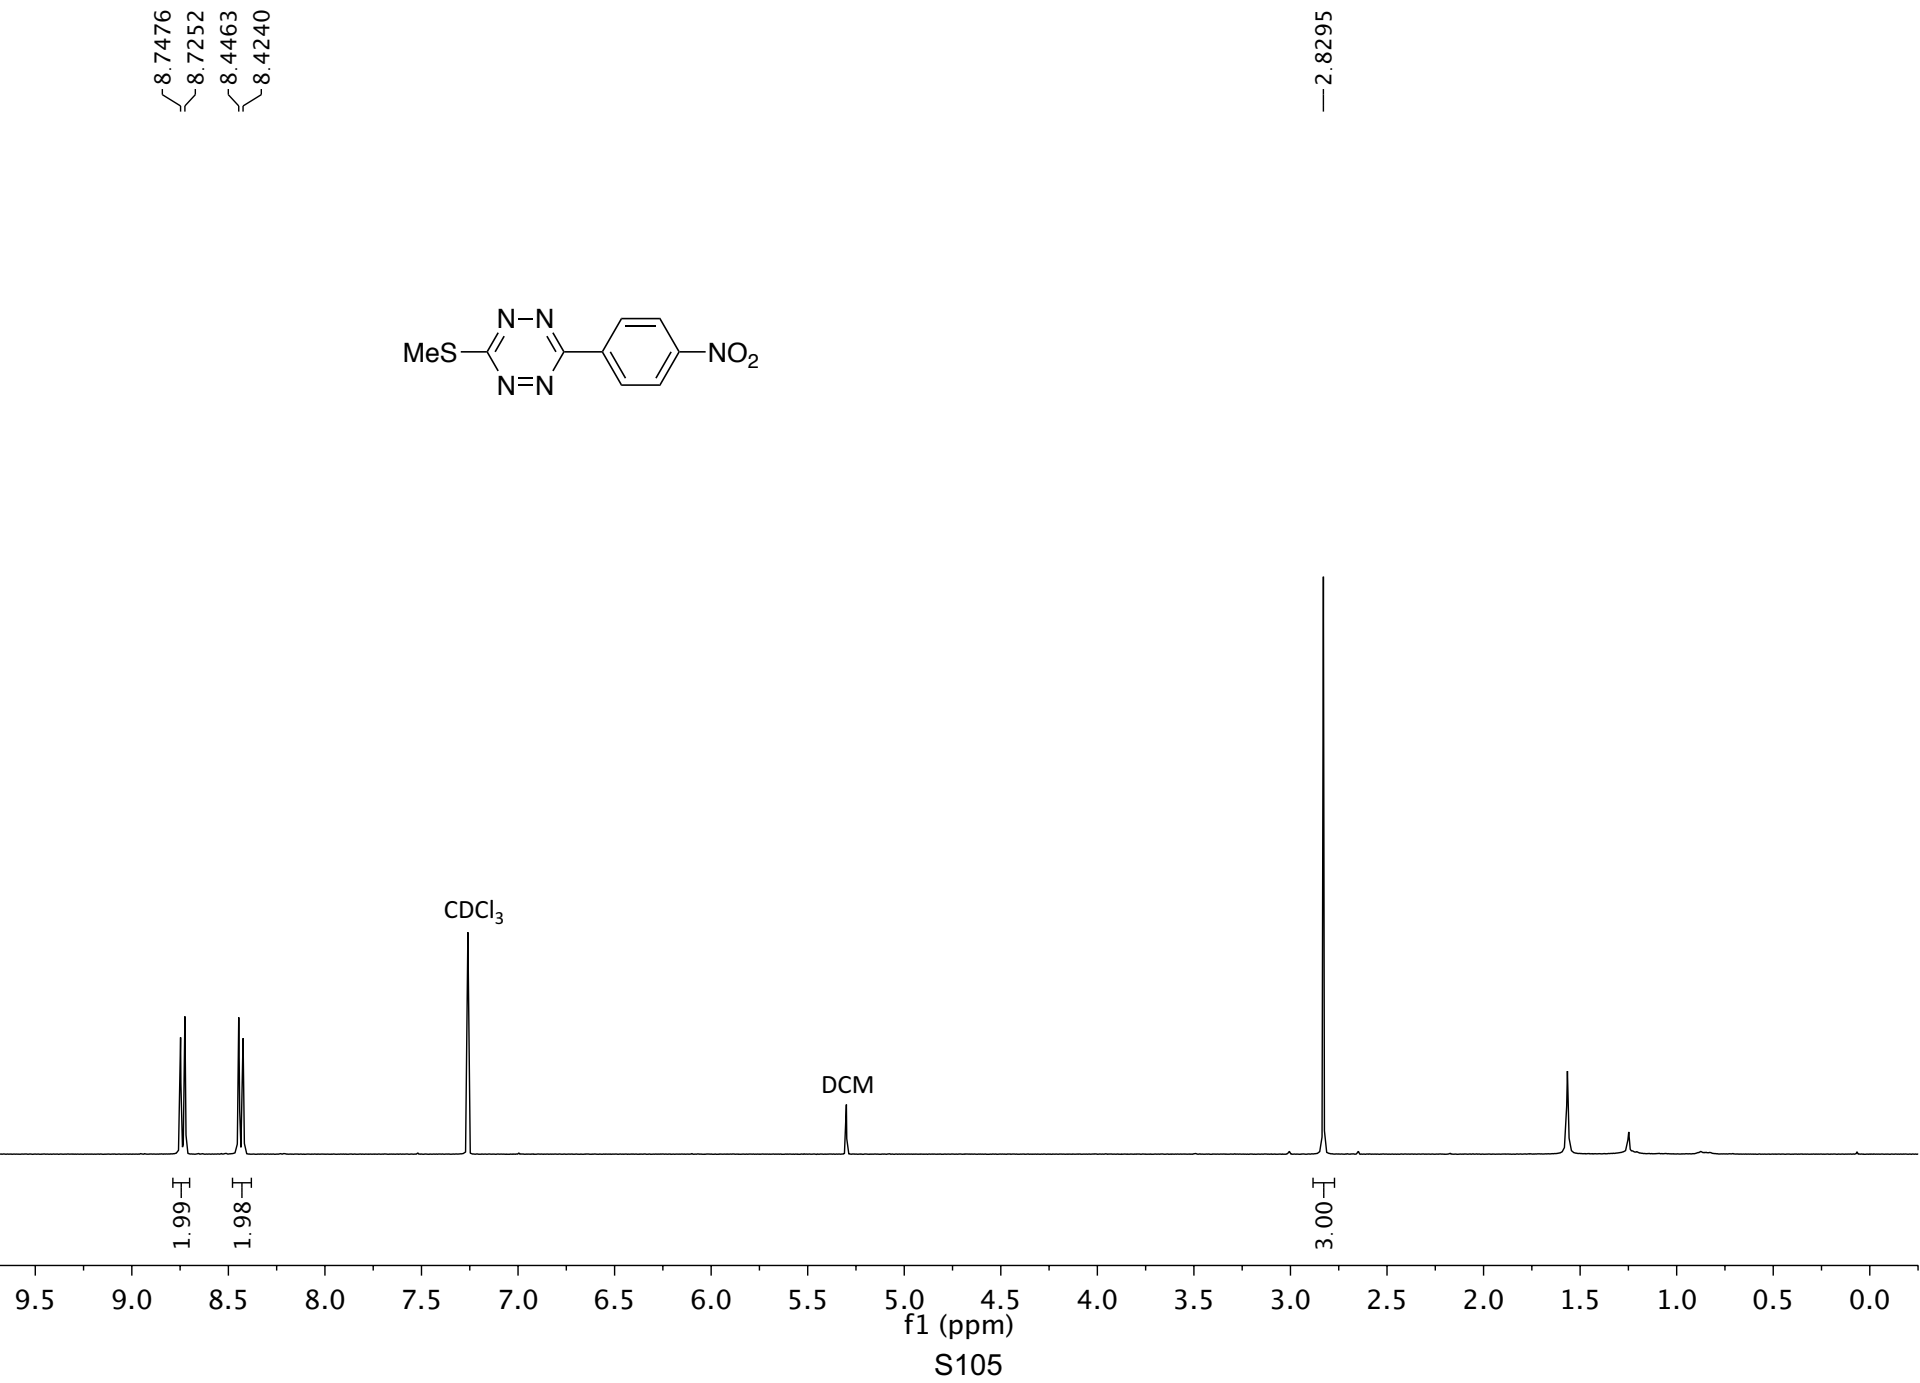

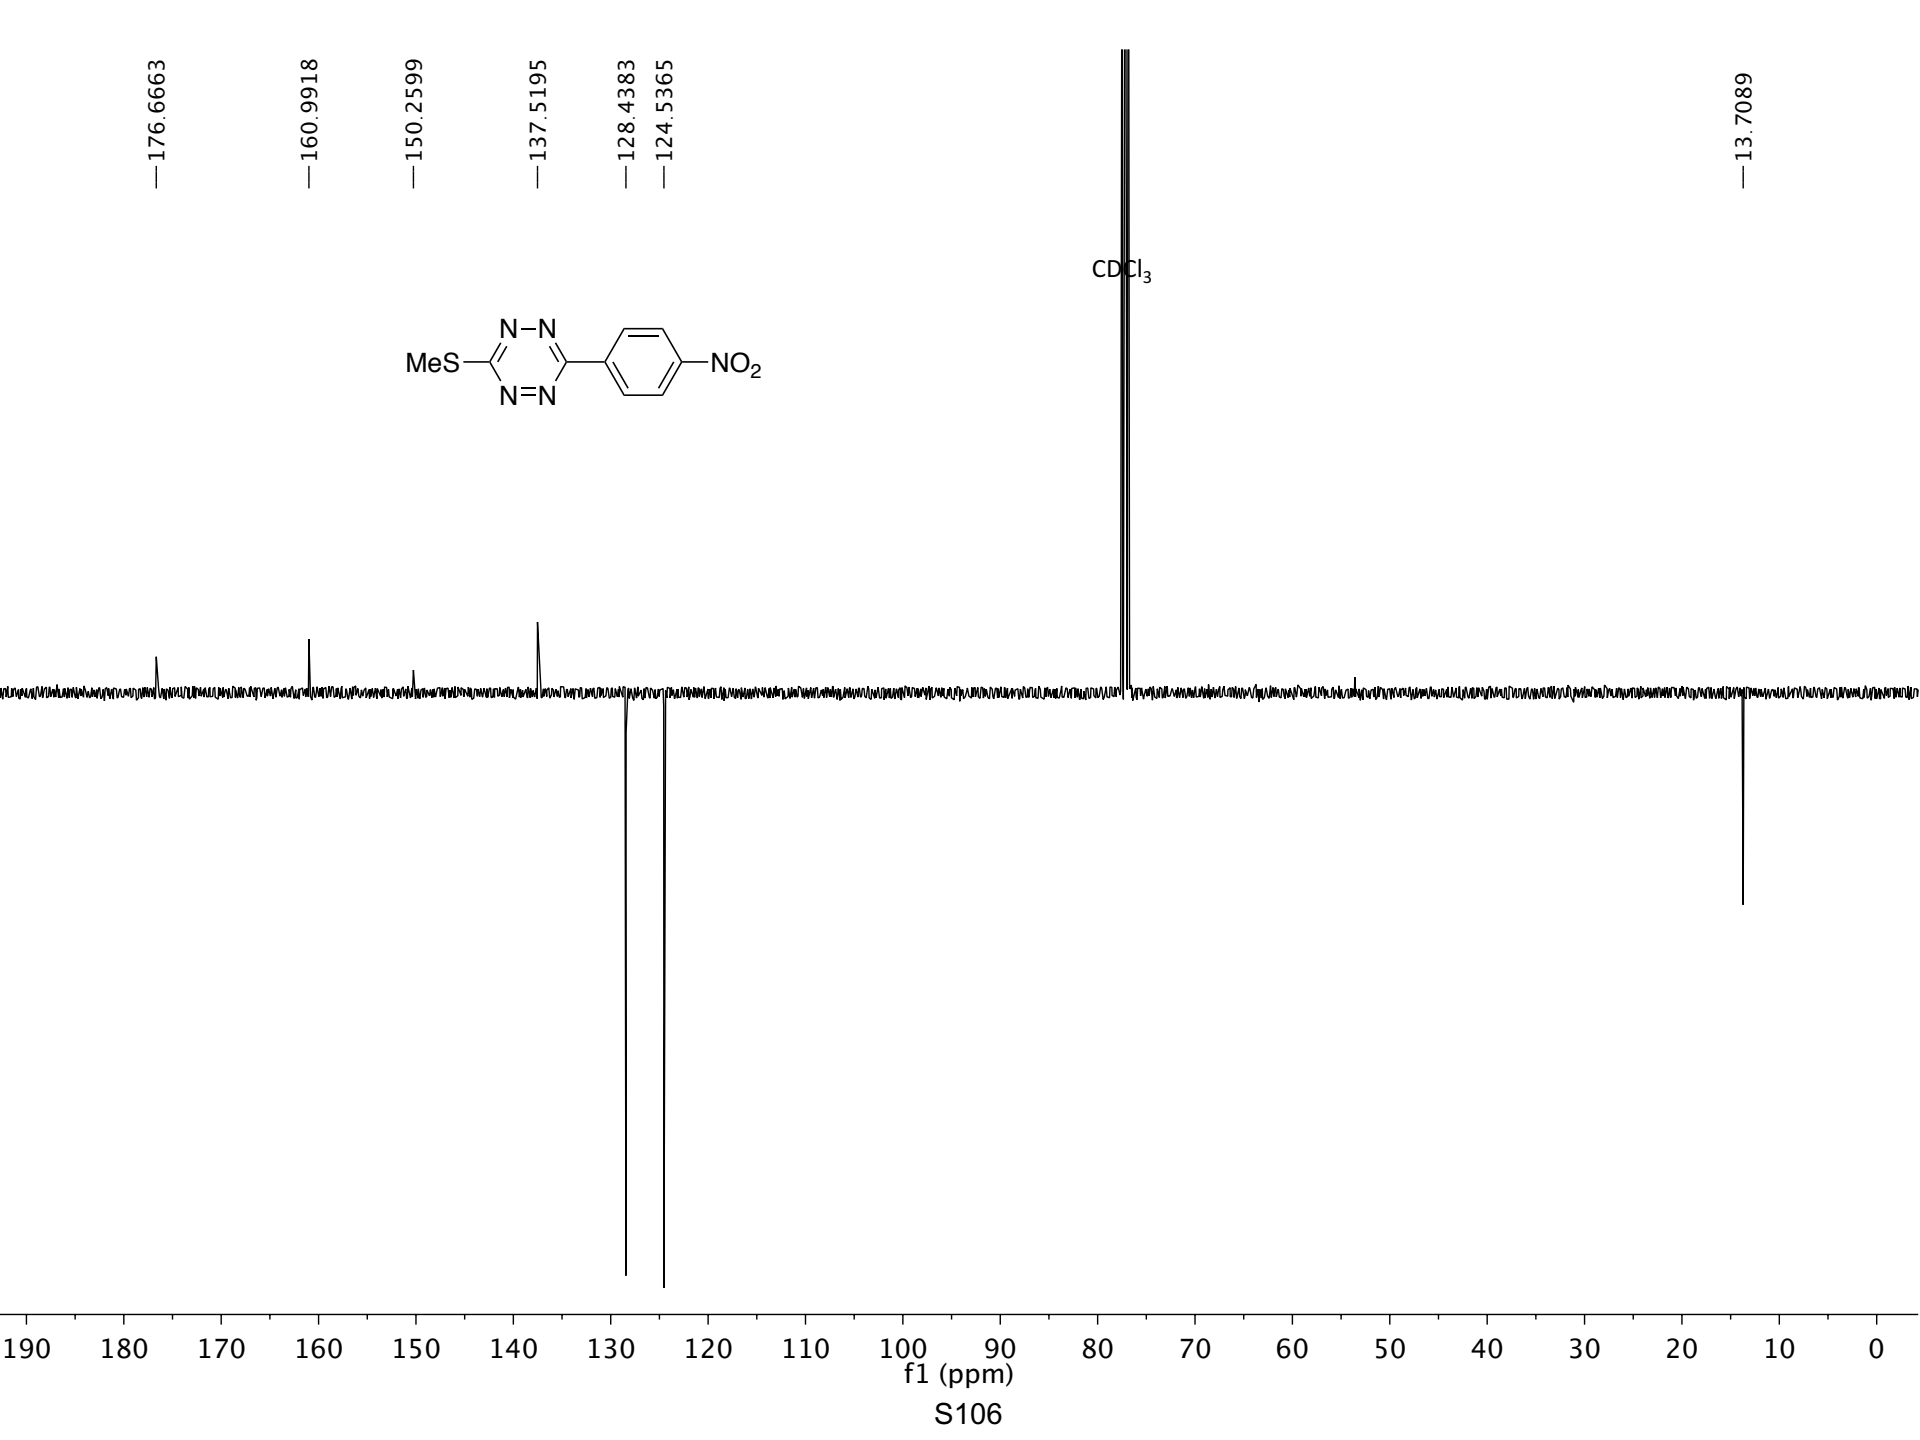

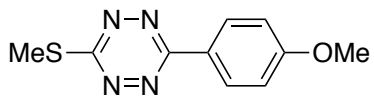

8.4915  
8.4691

7.0844  
7.0619

3.9131

2.7779

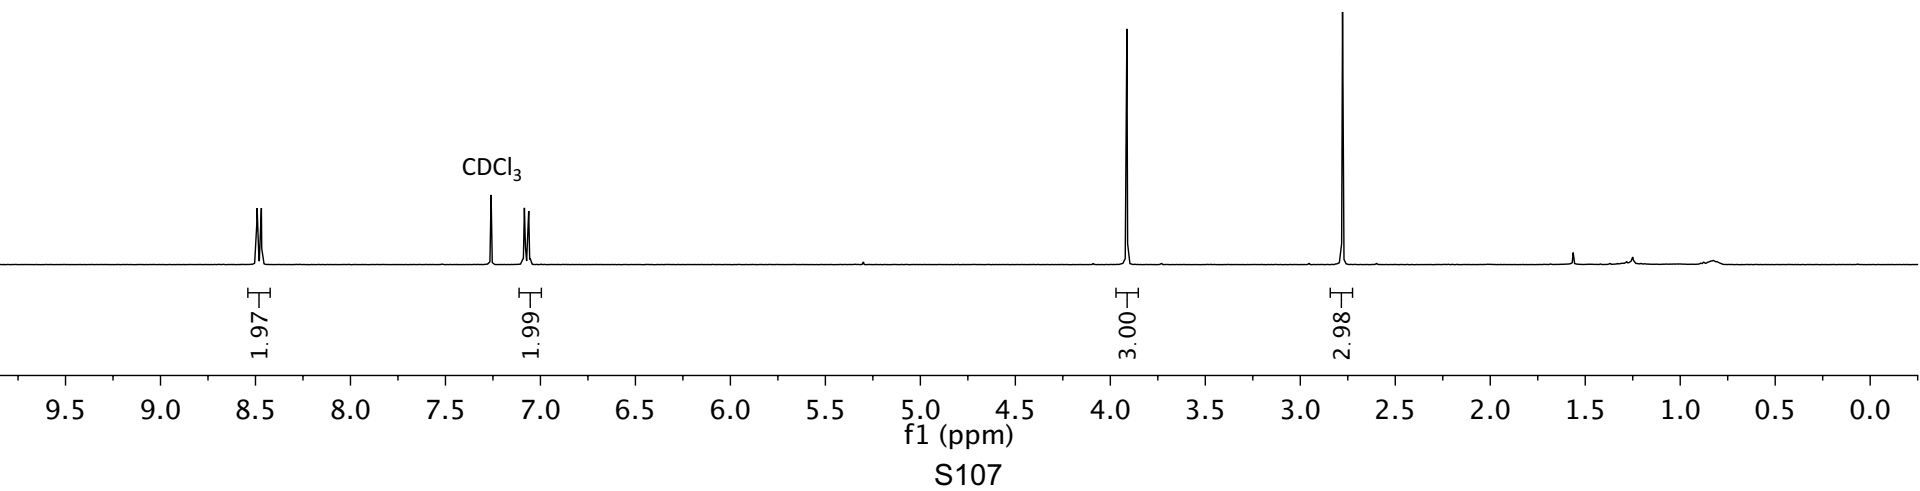

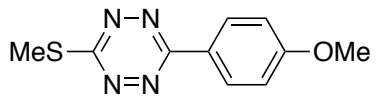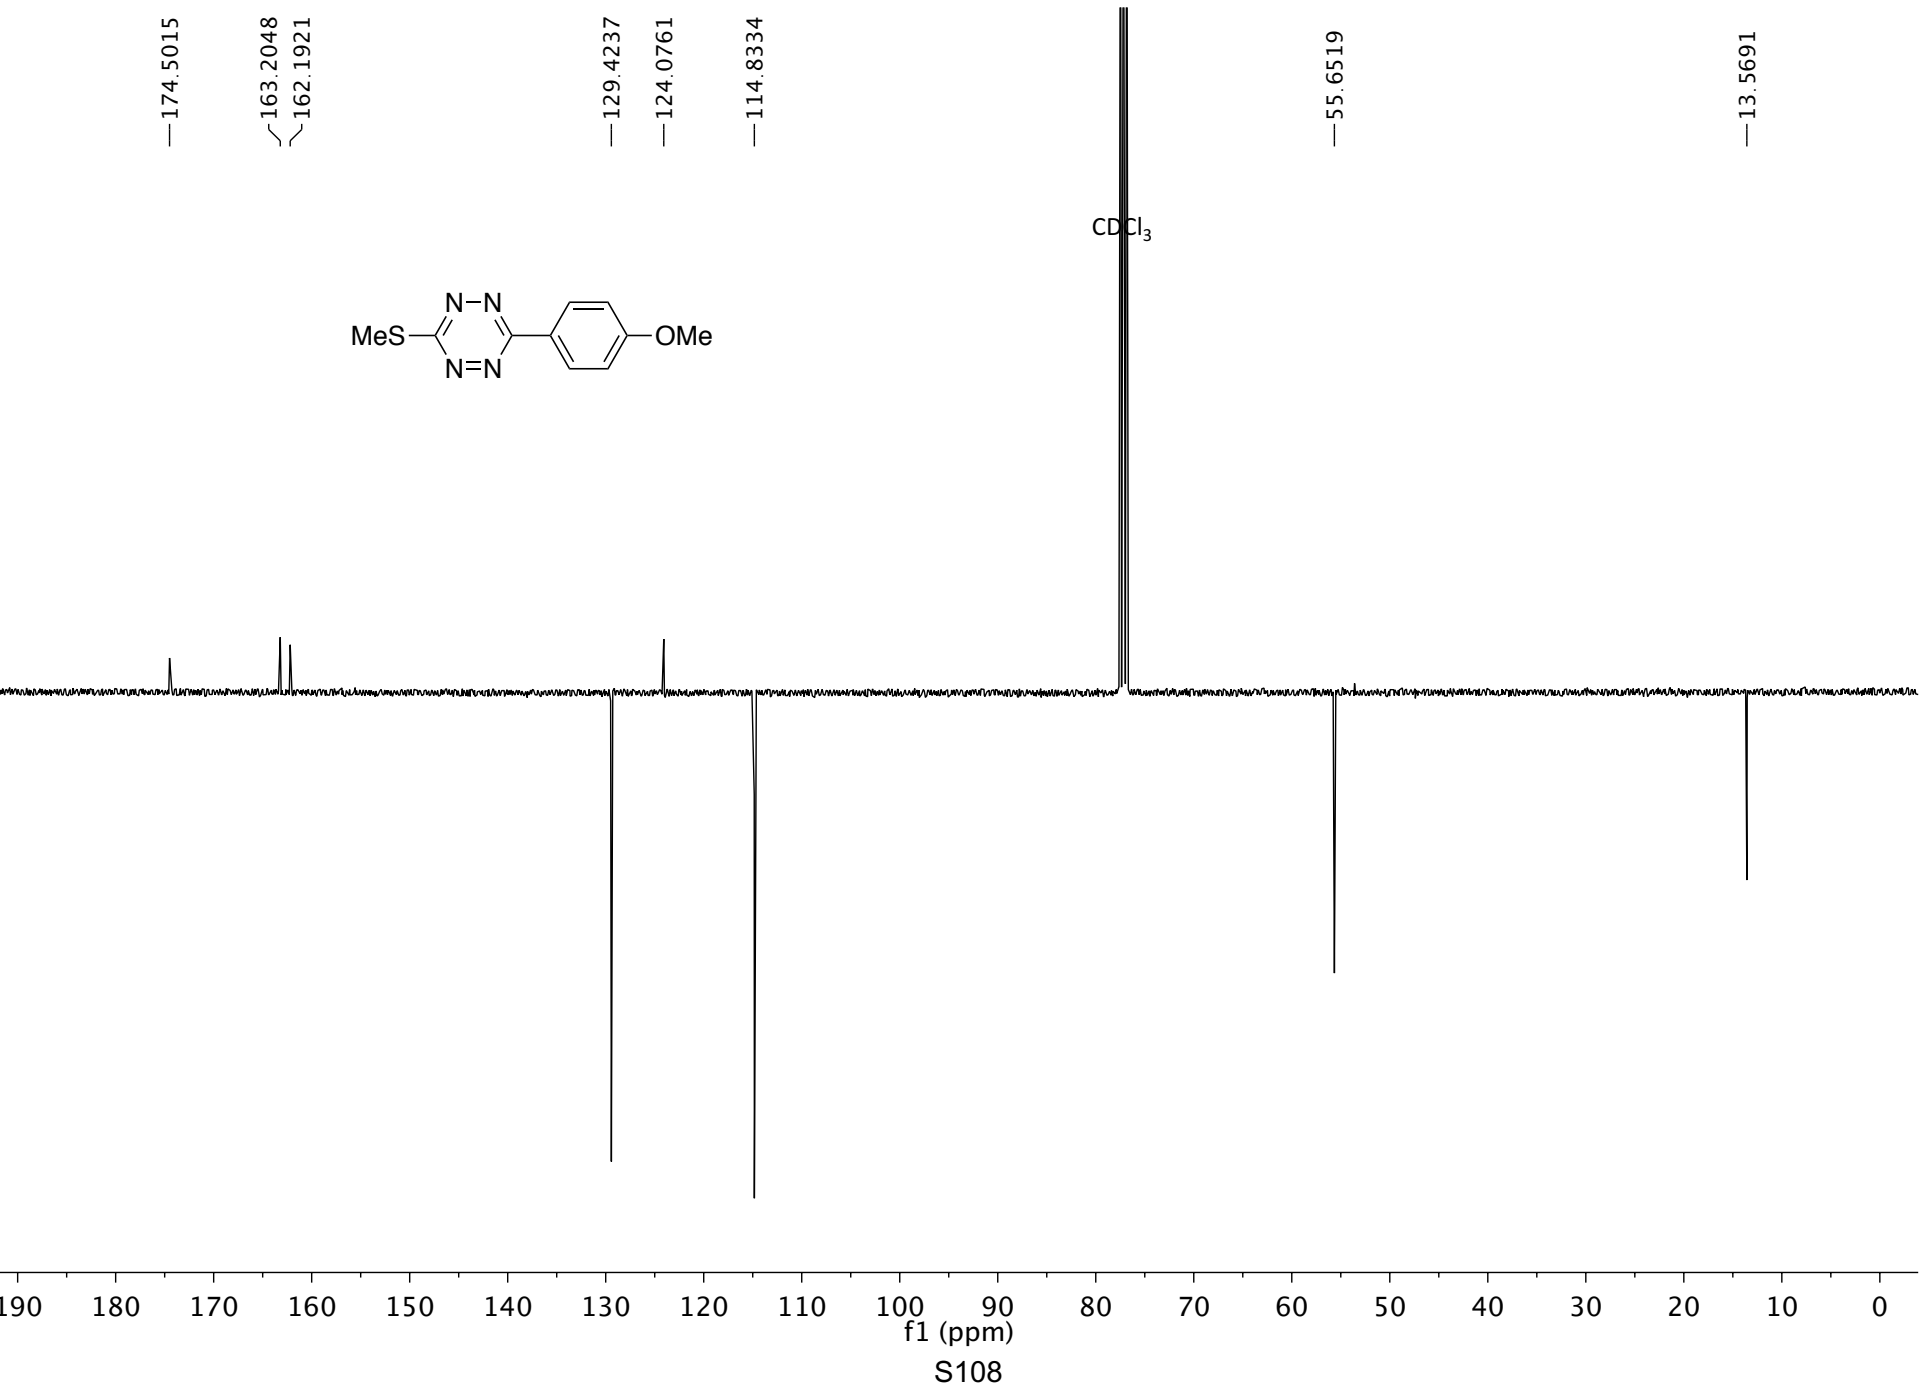

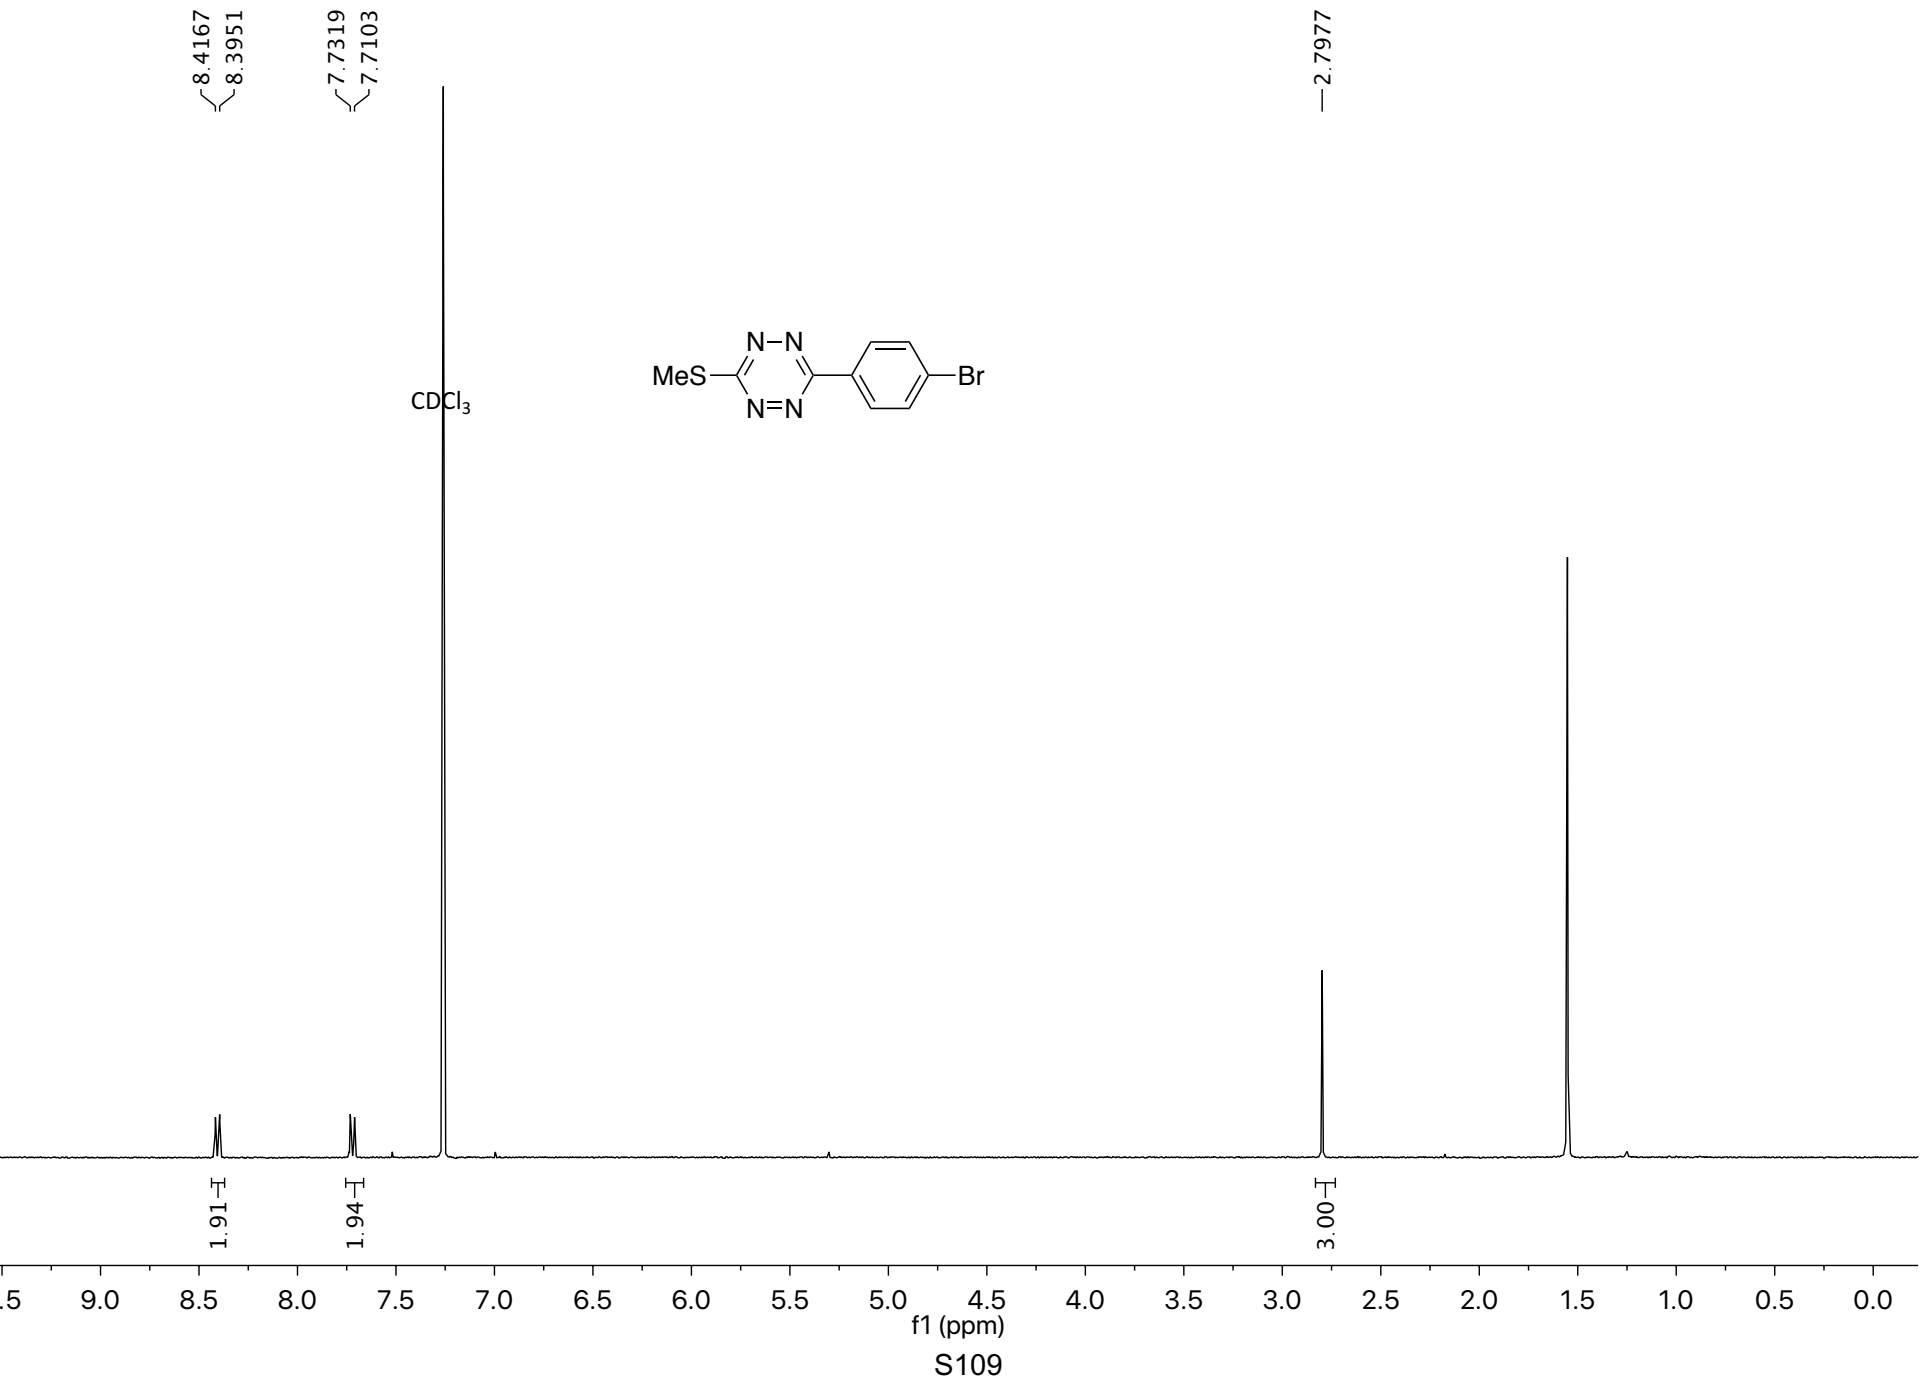

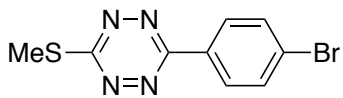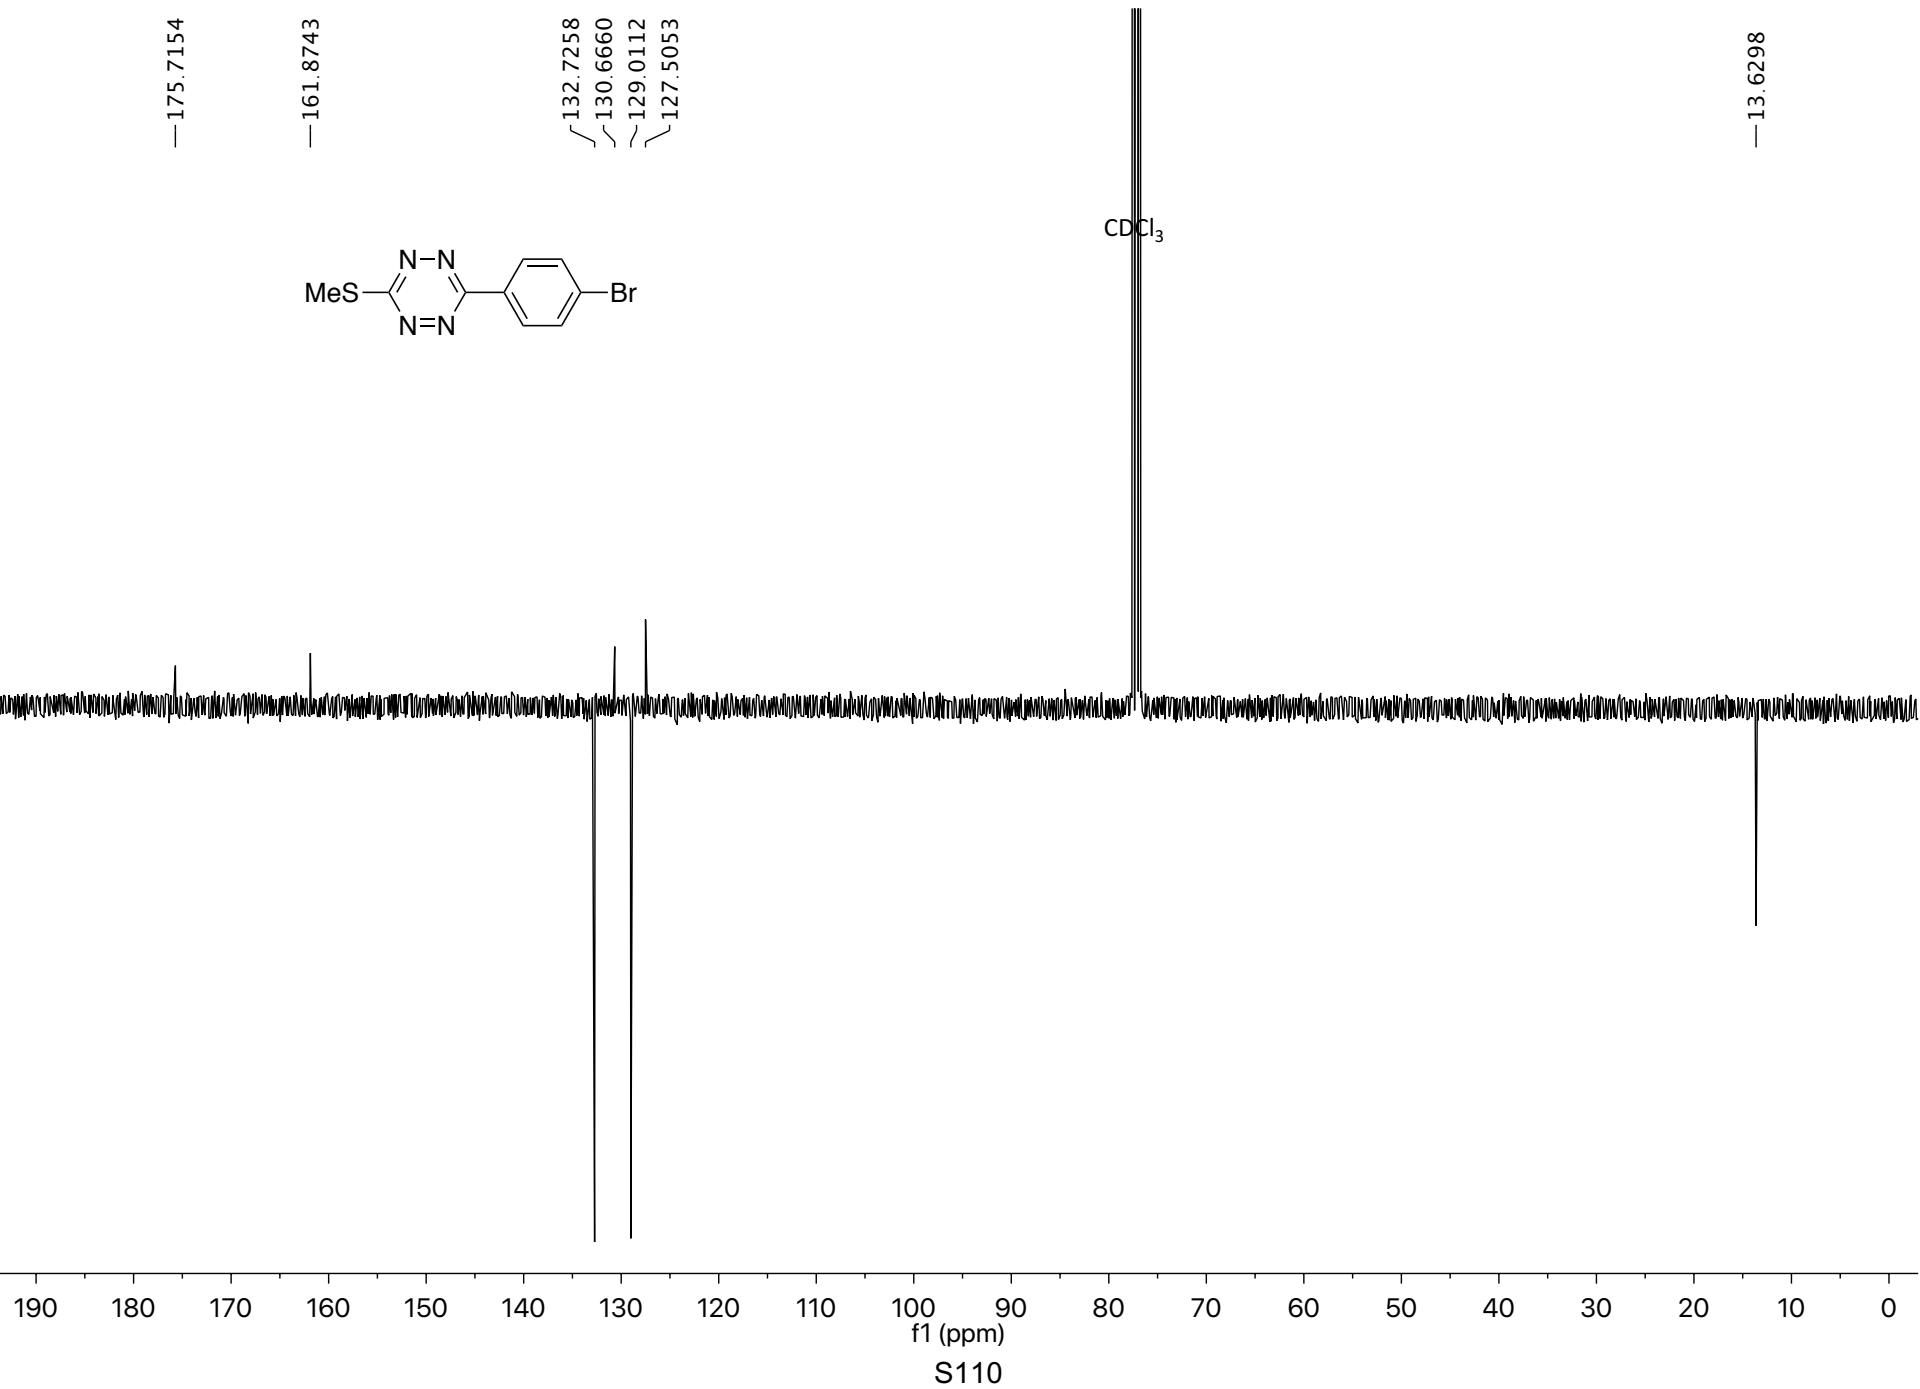

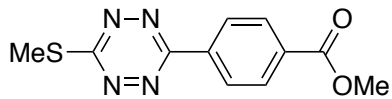

8.6168  
8.6026  
8.2451  
8.2308

3.9778

2.8133

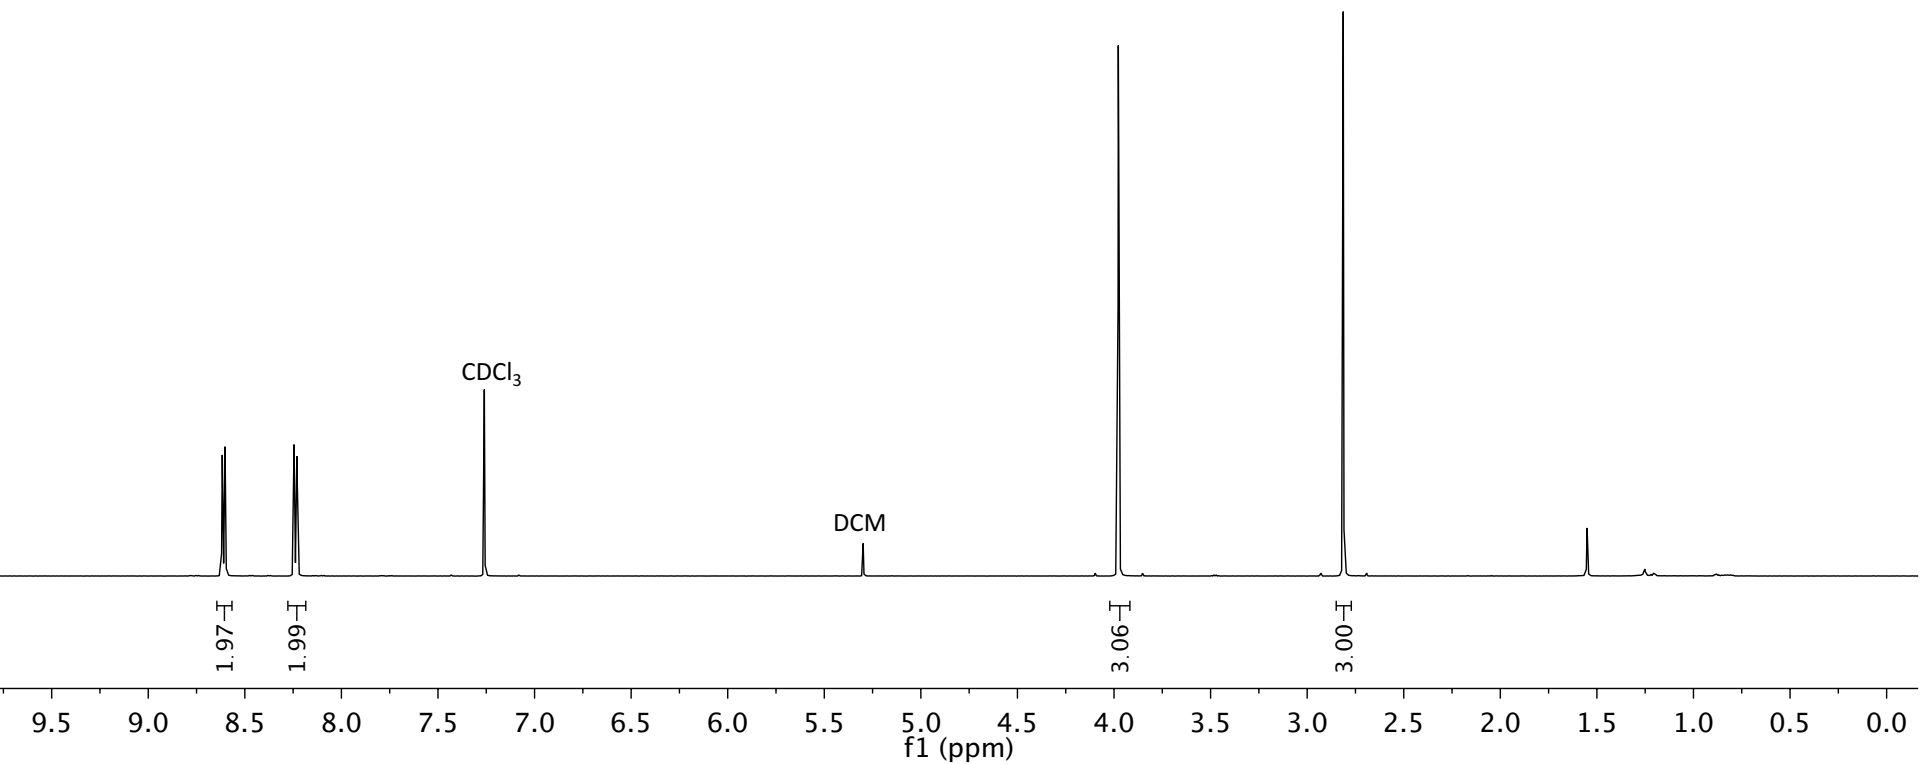

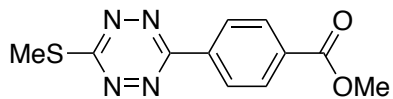

—176.0416

—166.5176

—161.8219

—135.7201

—133.4327

—130.5115

—127.5049

CDCl<sub>3</sub>

—52.6296

—13.6467

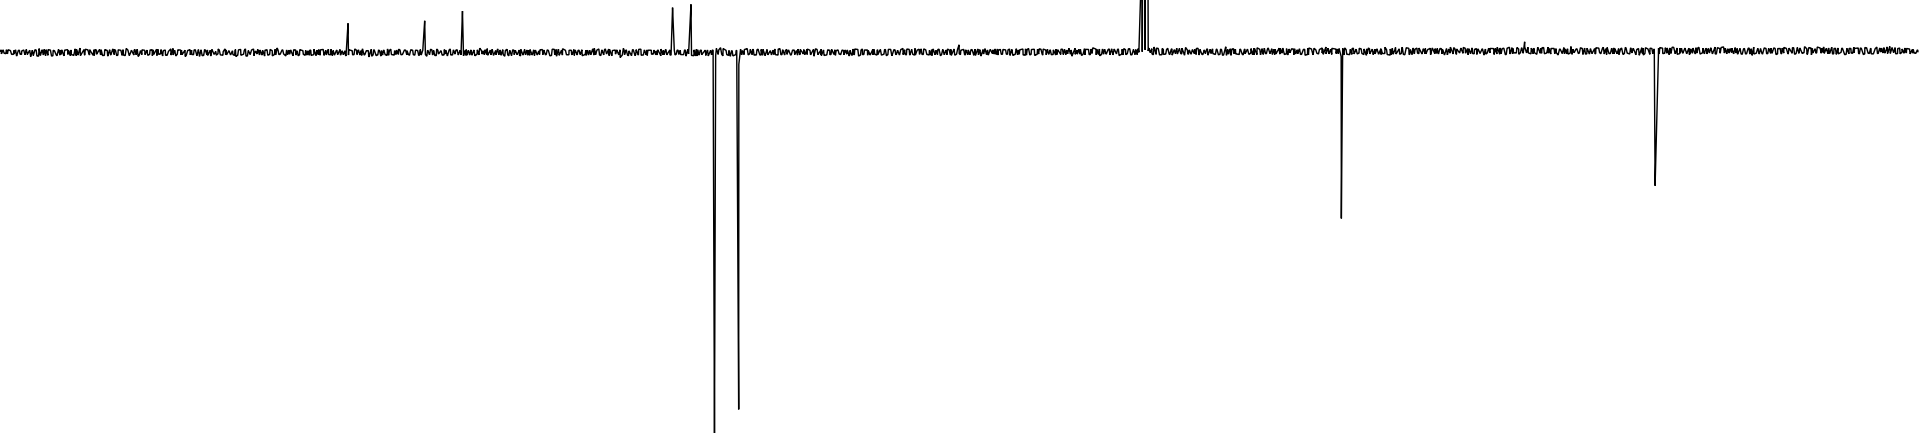

210 200 190 180 170 160 150 140 130 120 110 100 90 80 70 60 50 40 30 20 10 0 -10

f1 (ppm)

S112



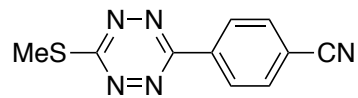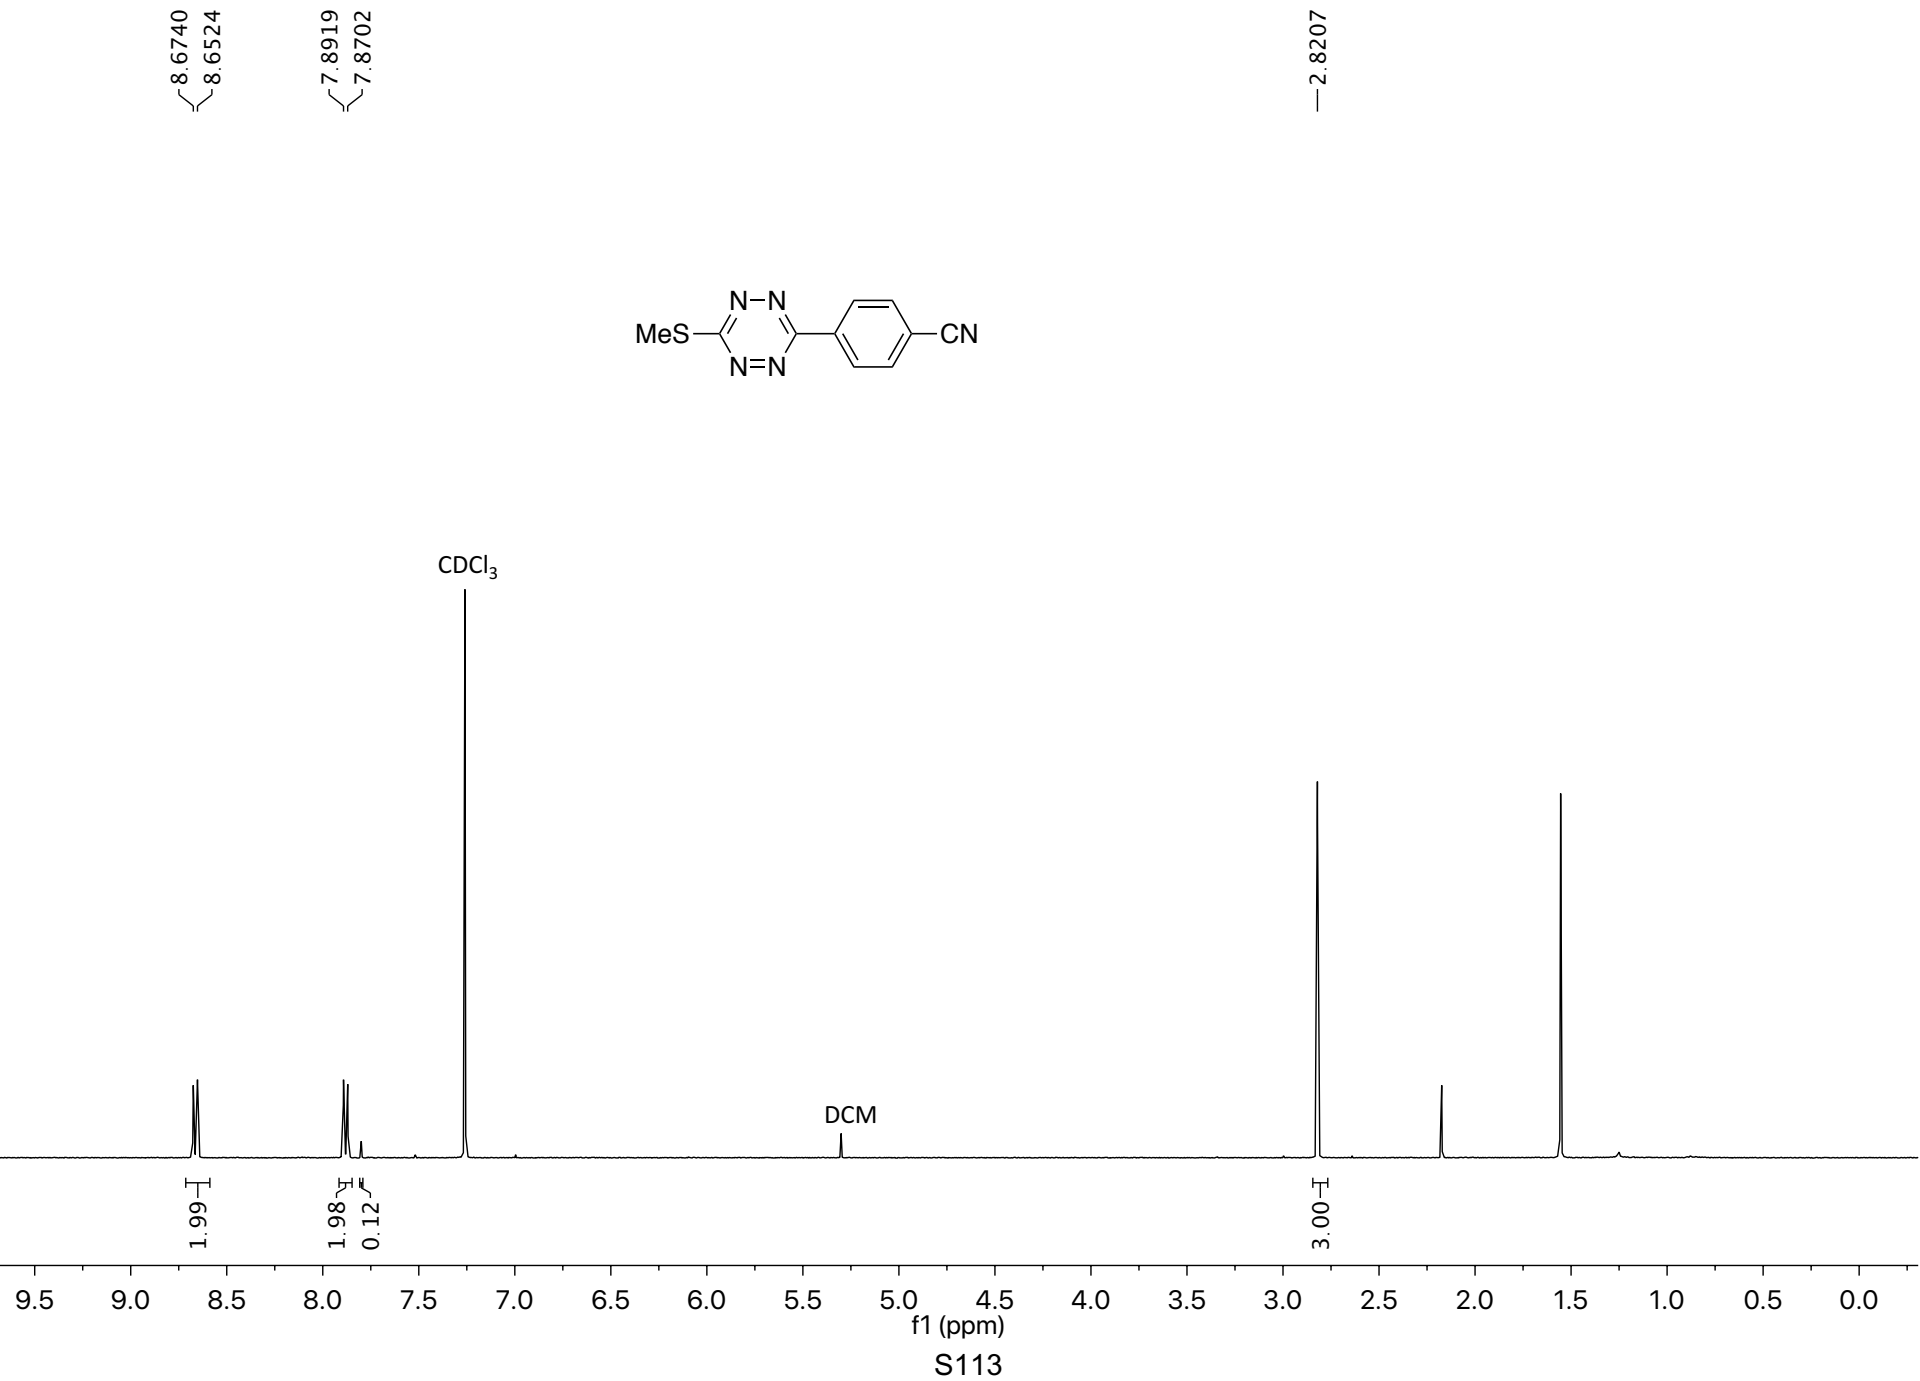

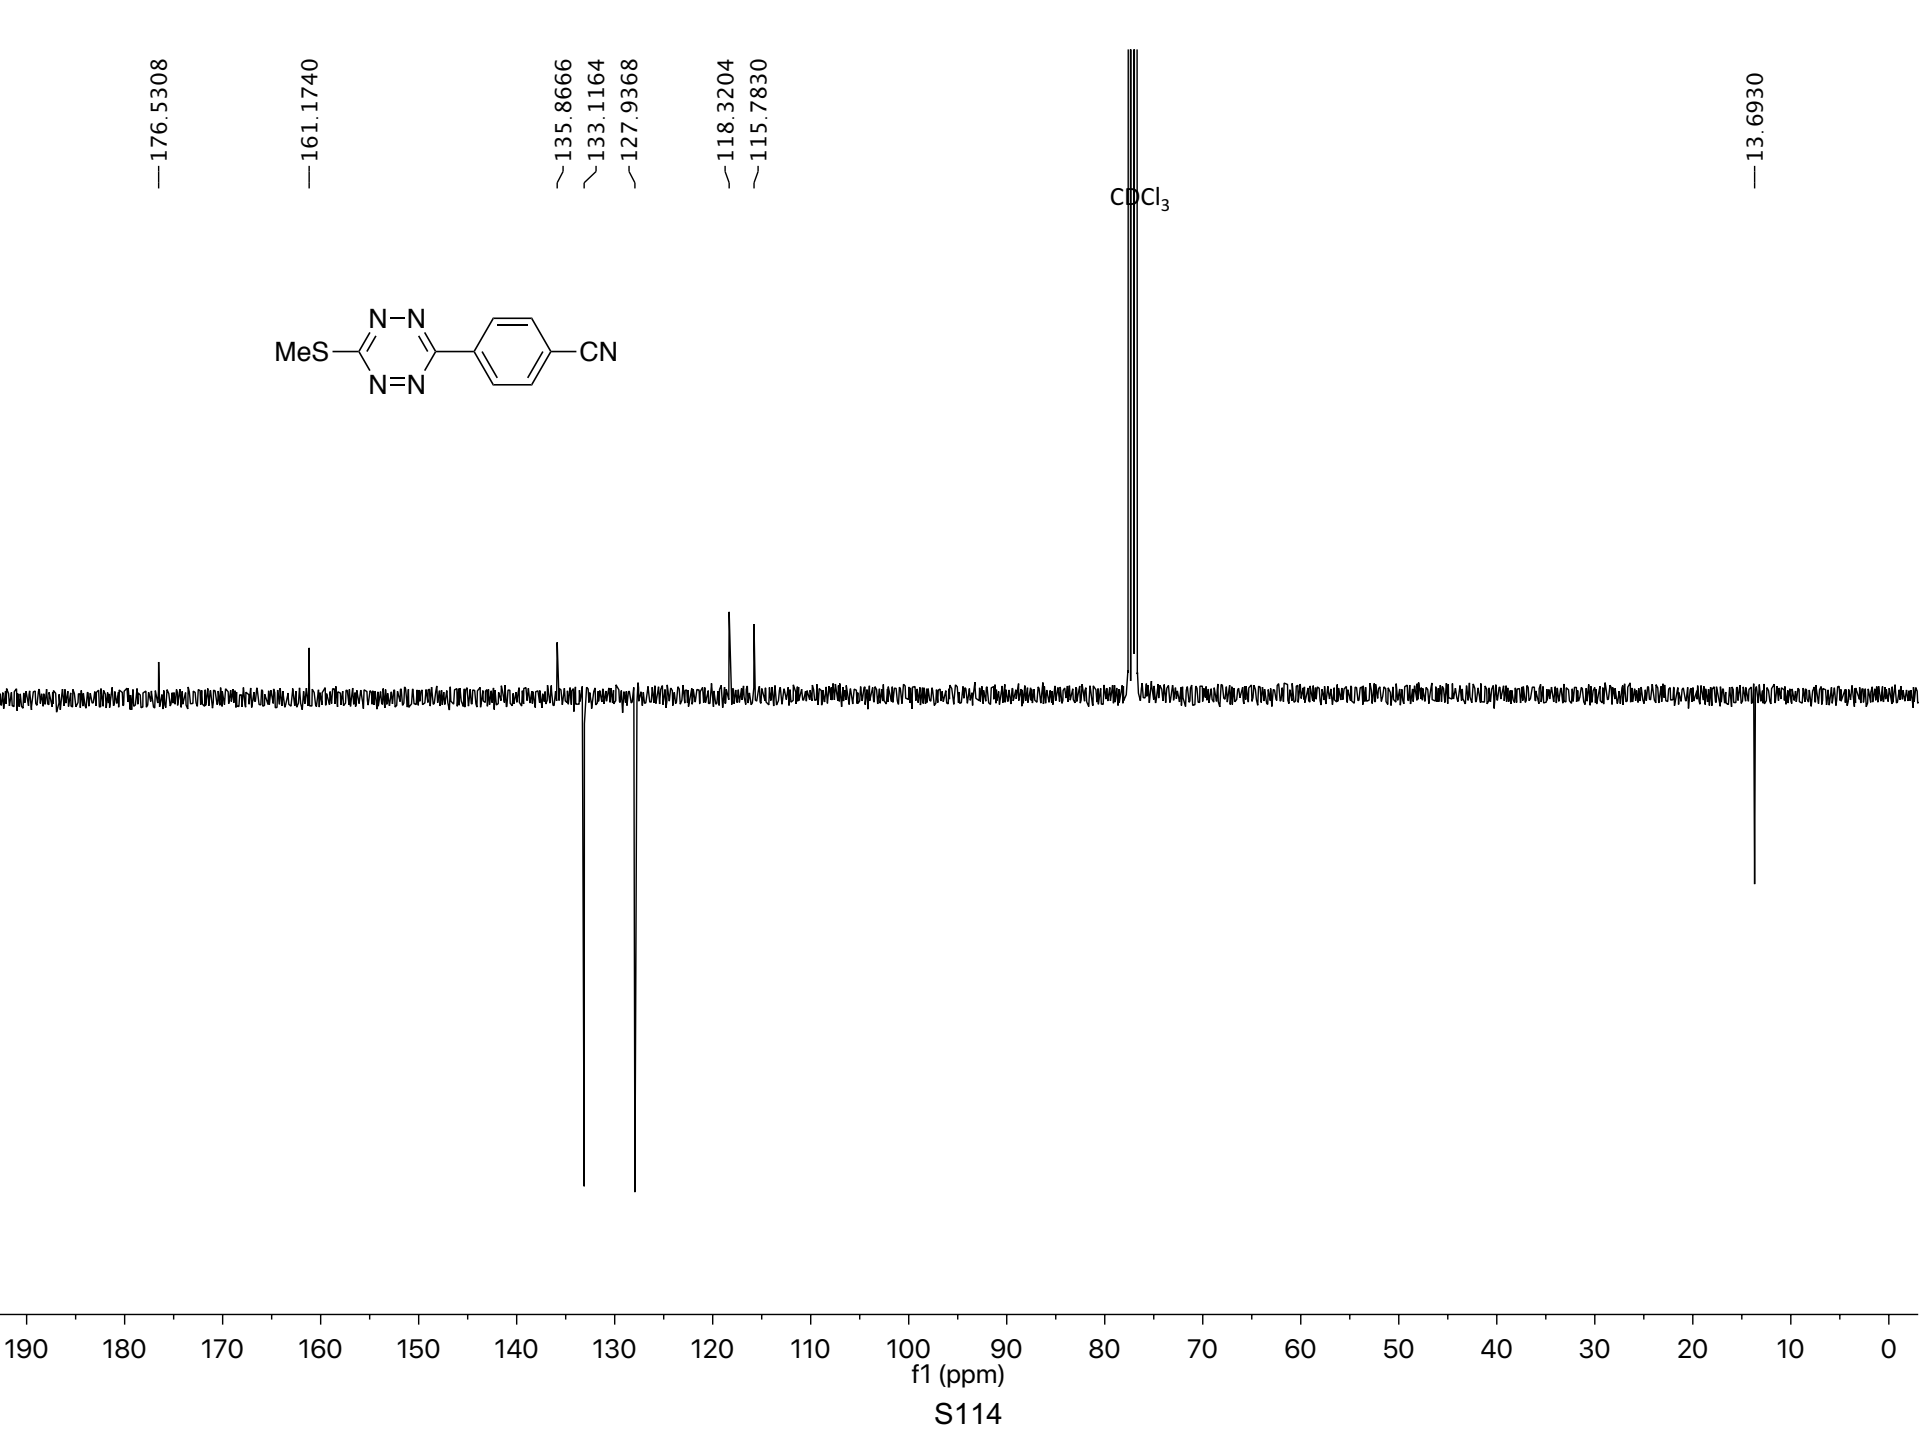

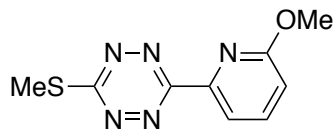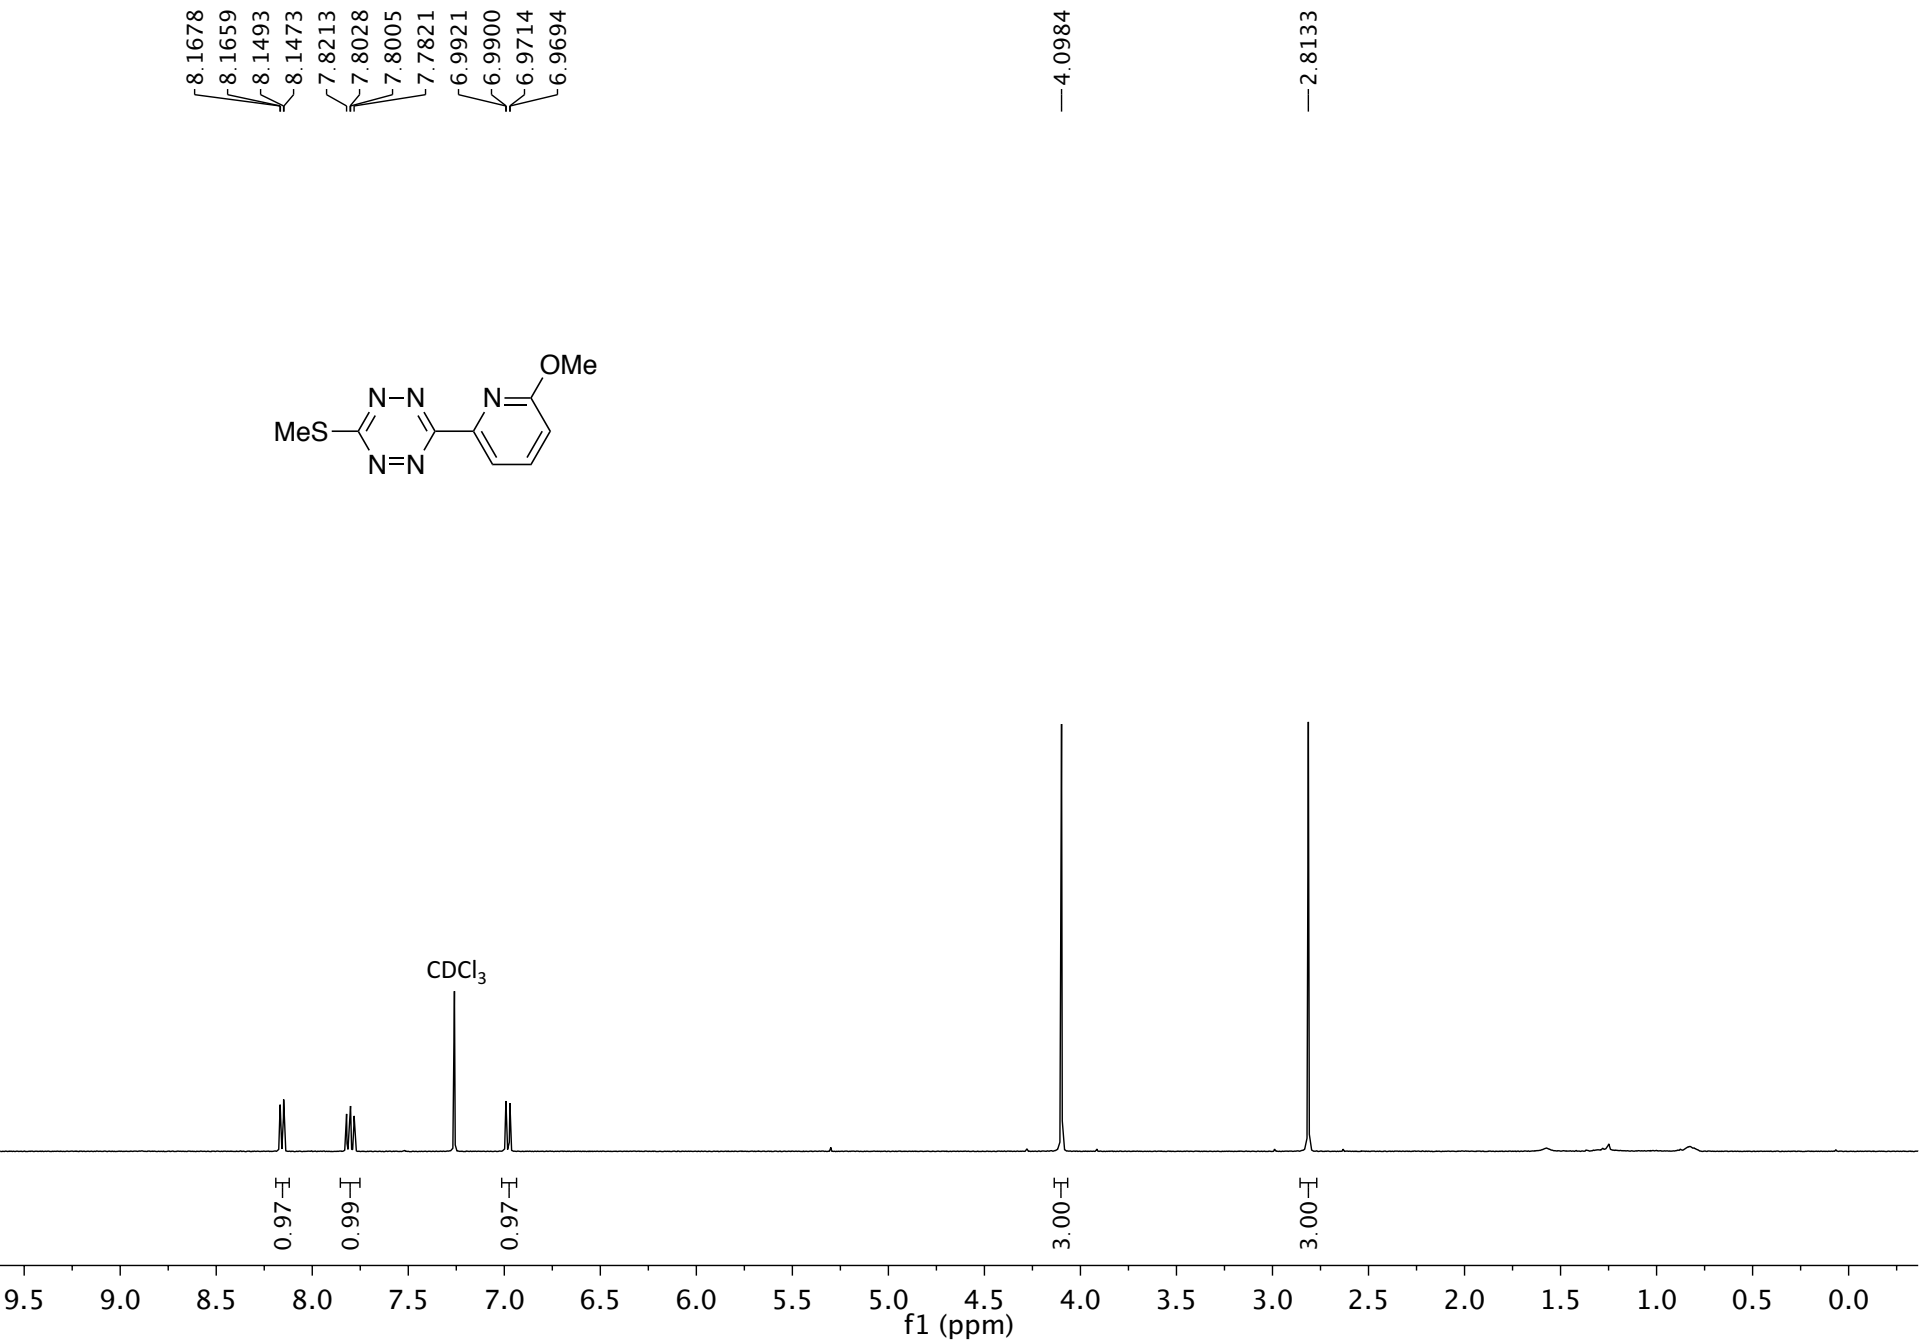

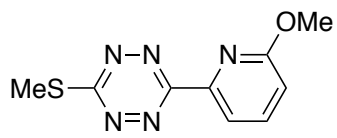

— 176.0534  
~ 164.7364  
~ 162.0374  
— 147.6948  
— 139.5758  
~ 117.1044  
~ 114.5187

— 53.9363

— 13.6323

CDCl<sub>3</sub>

H grease

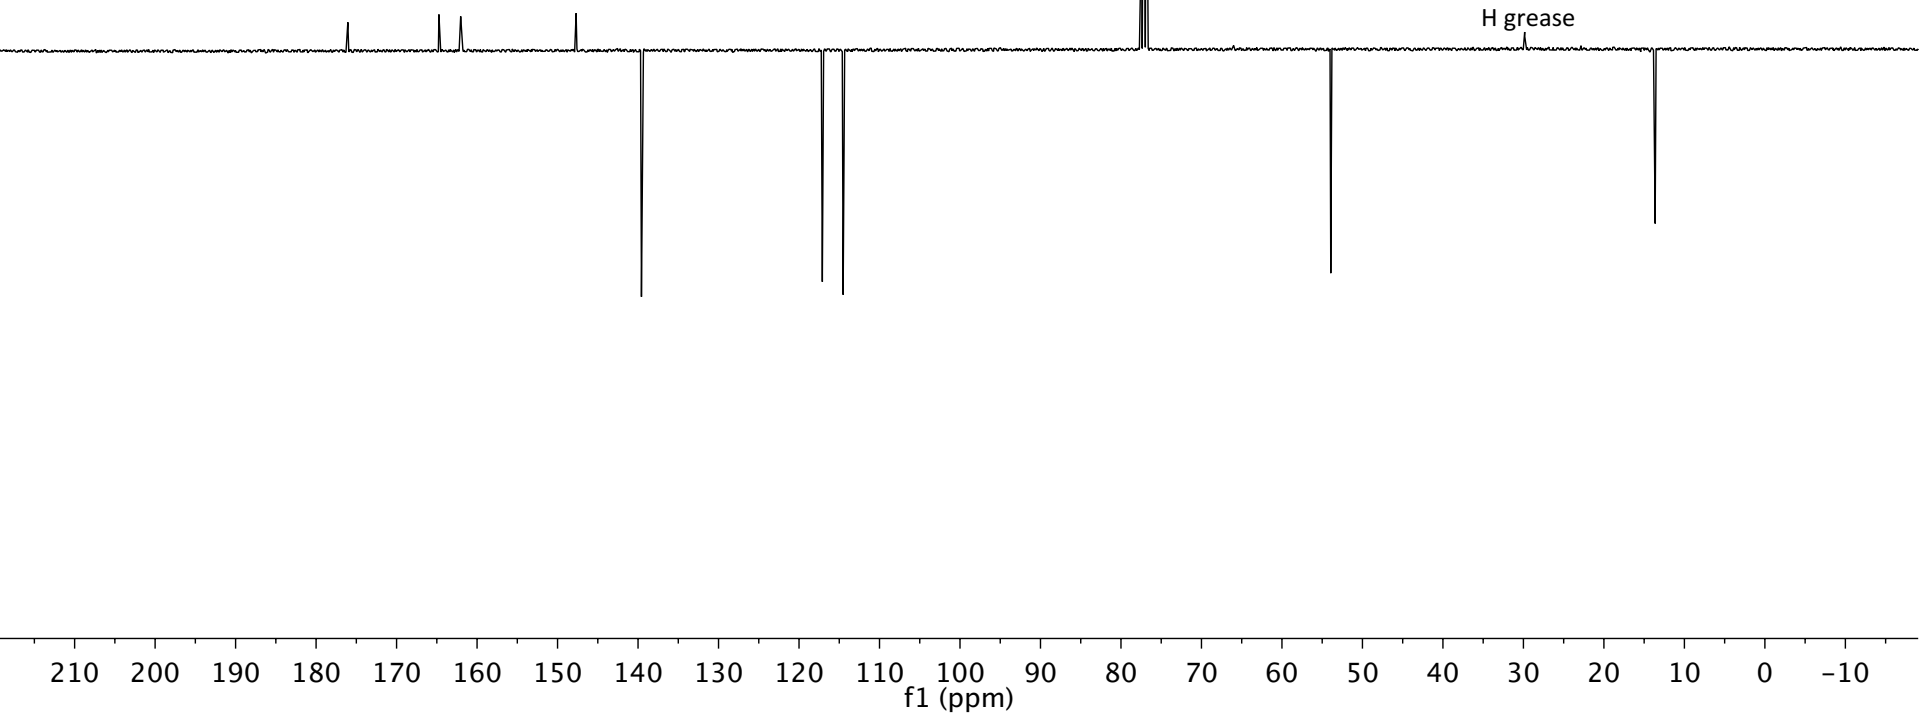

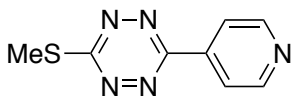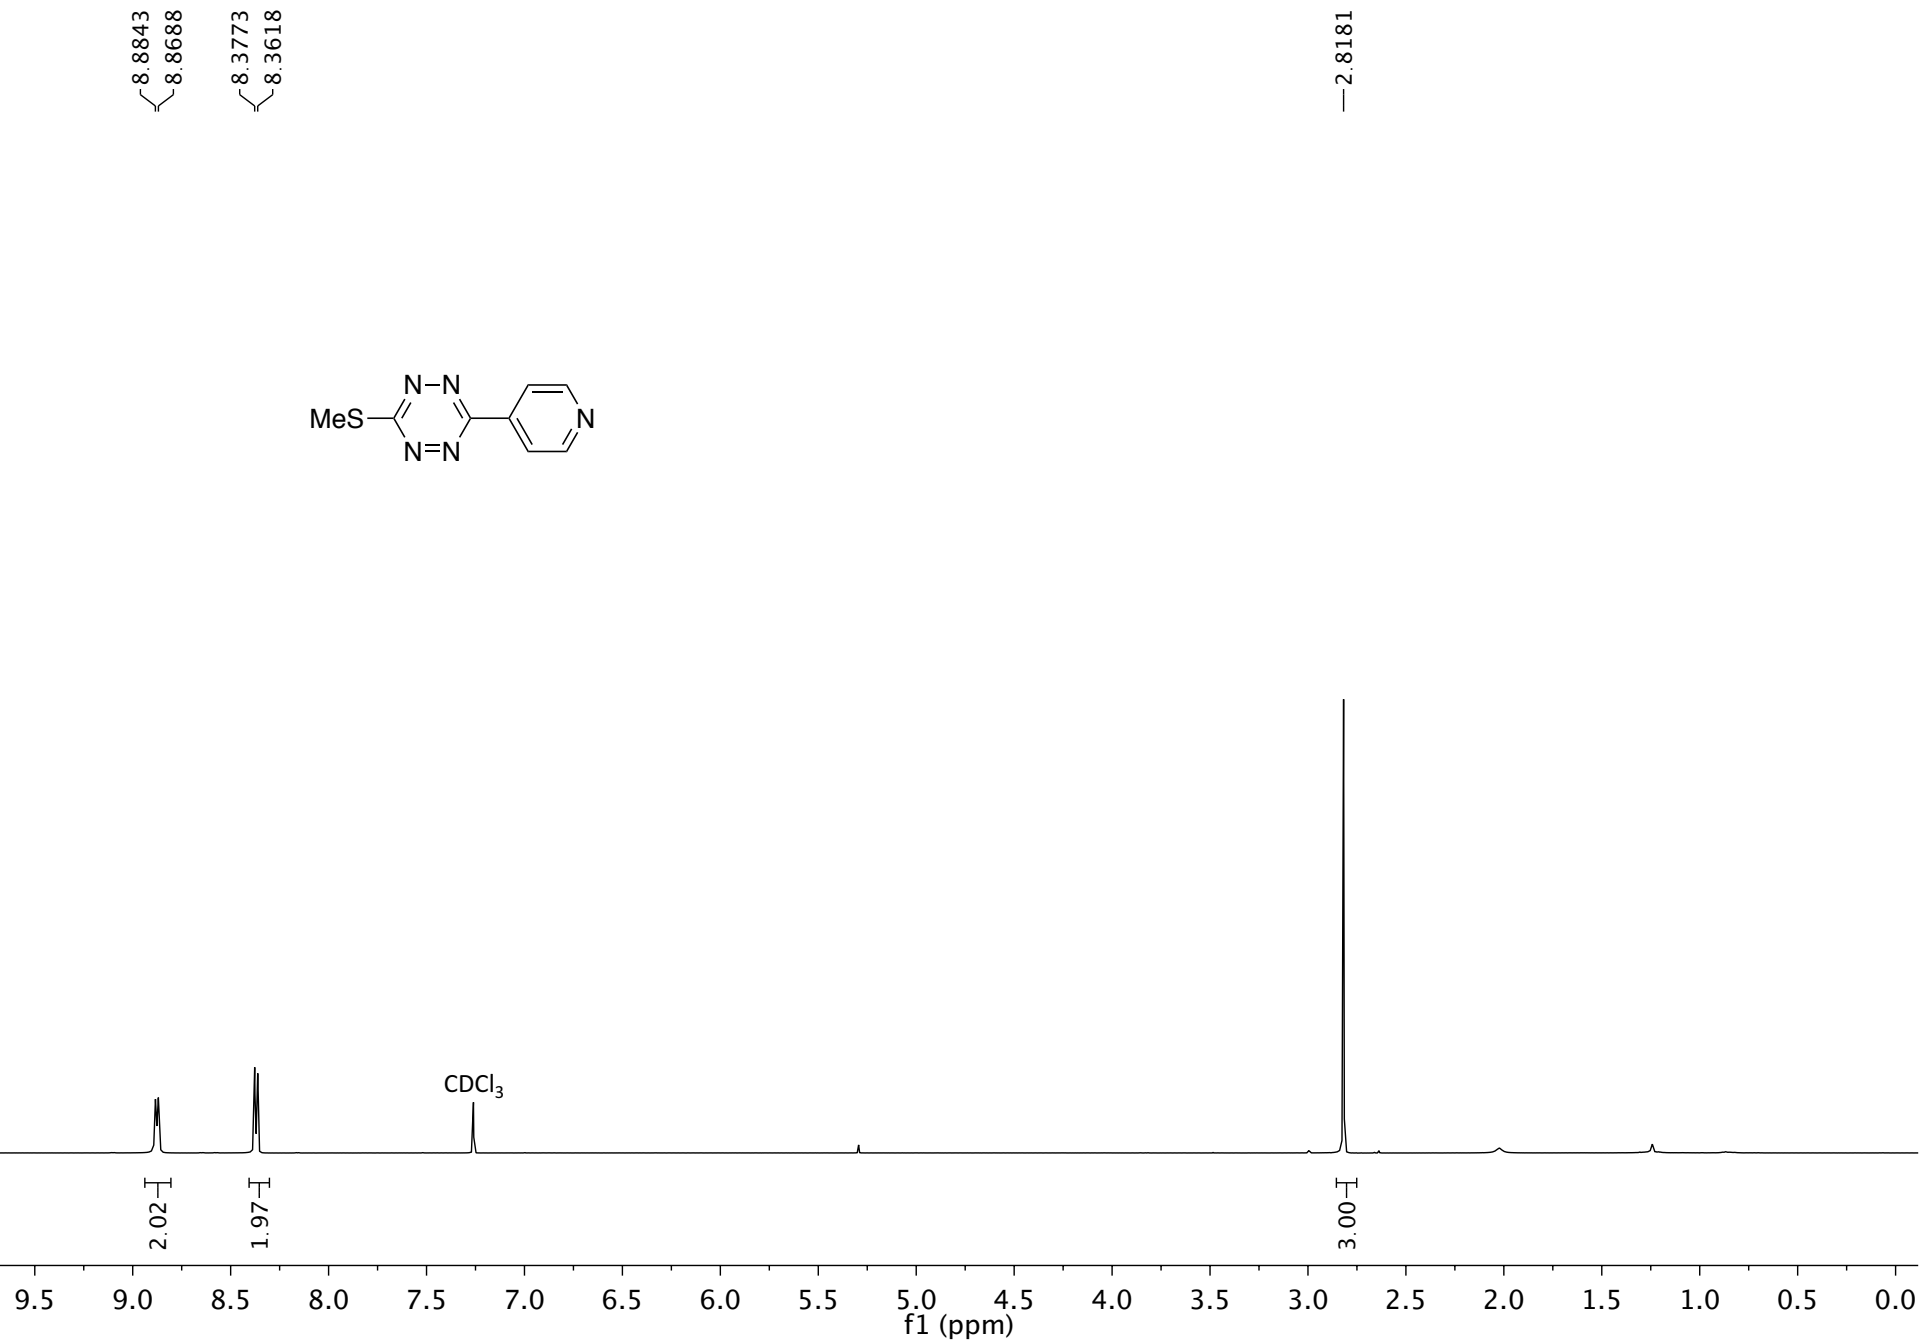

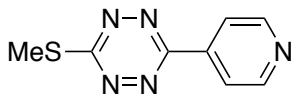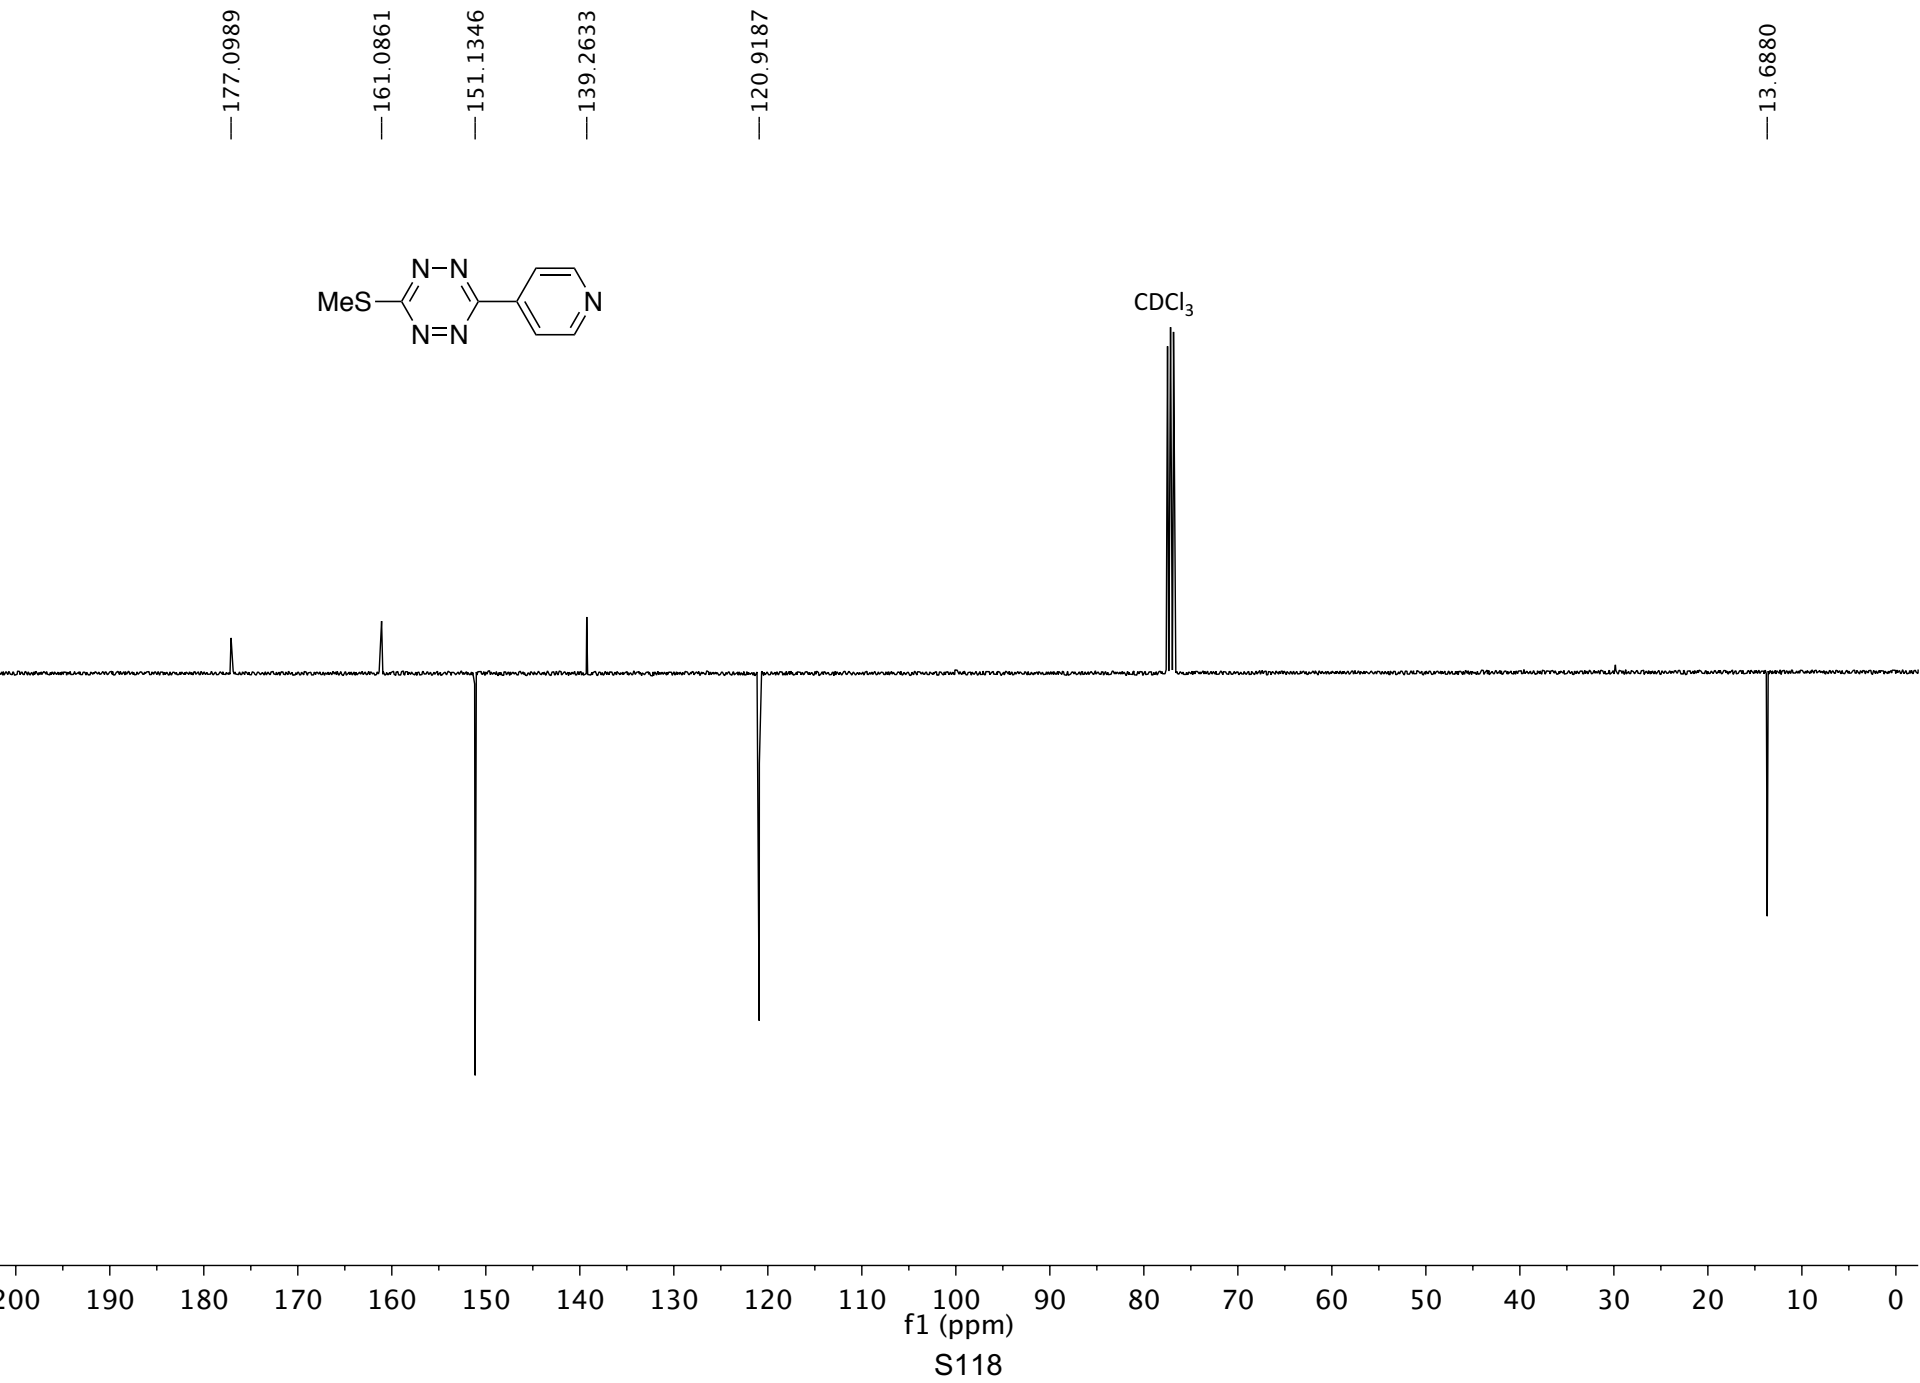

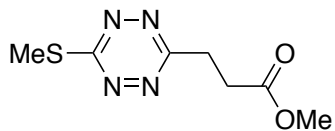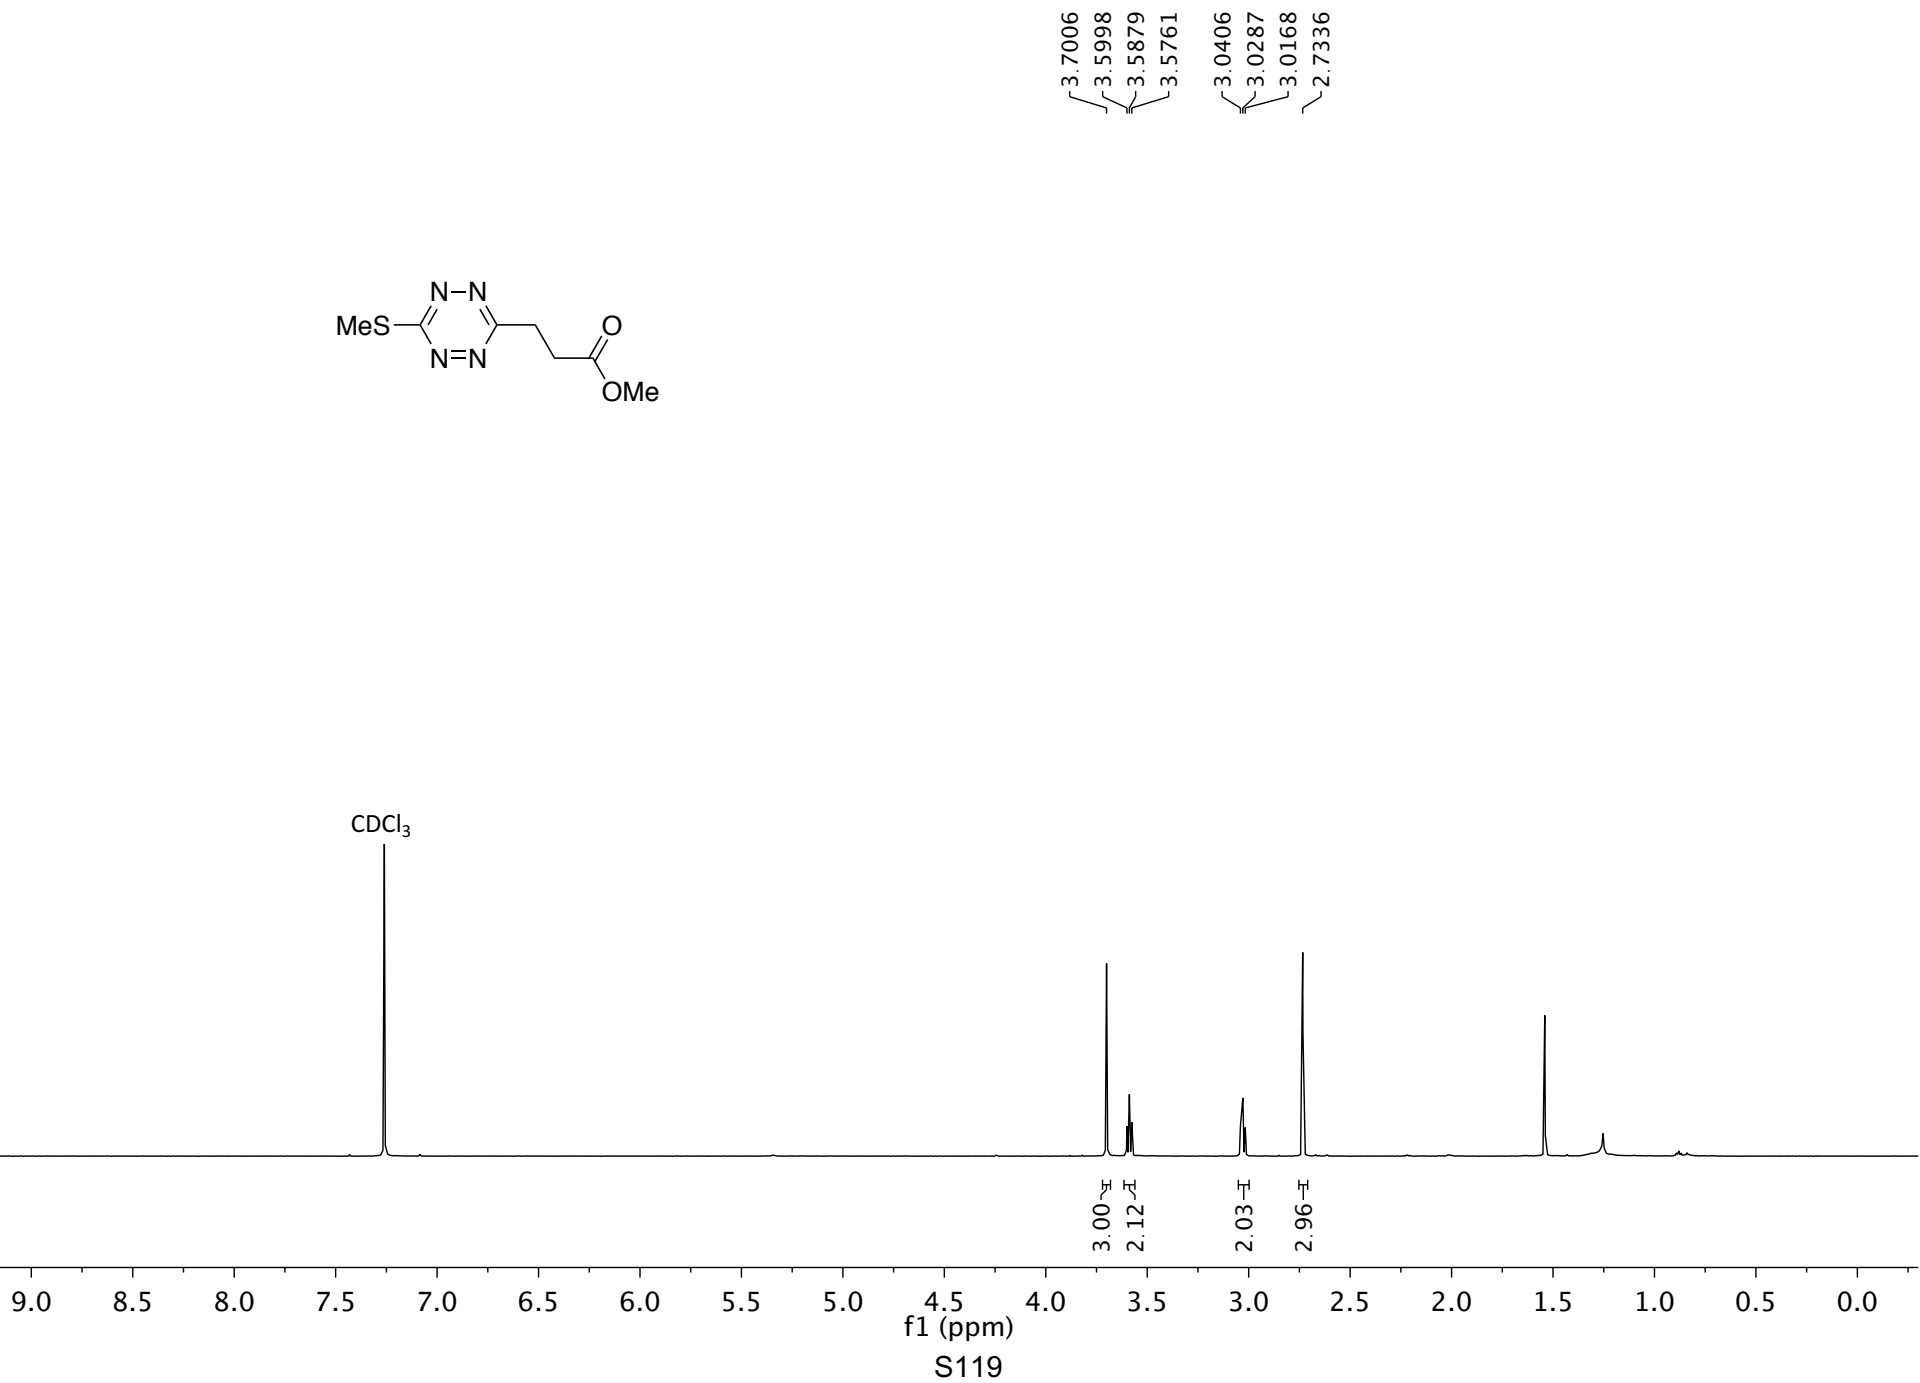

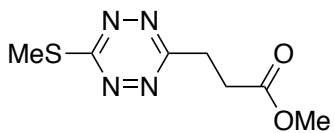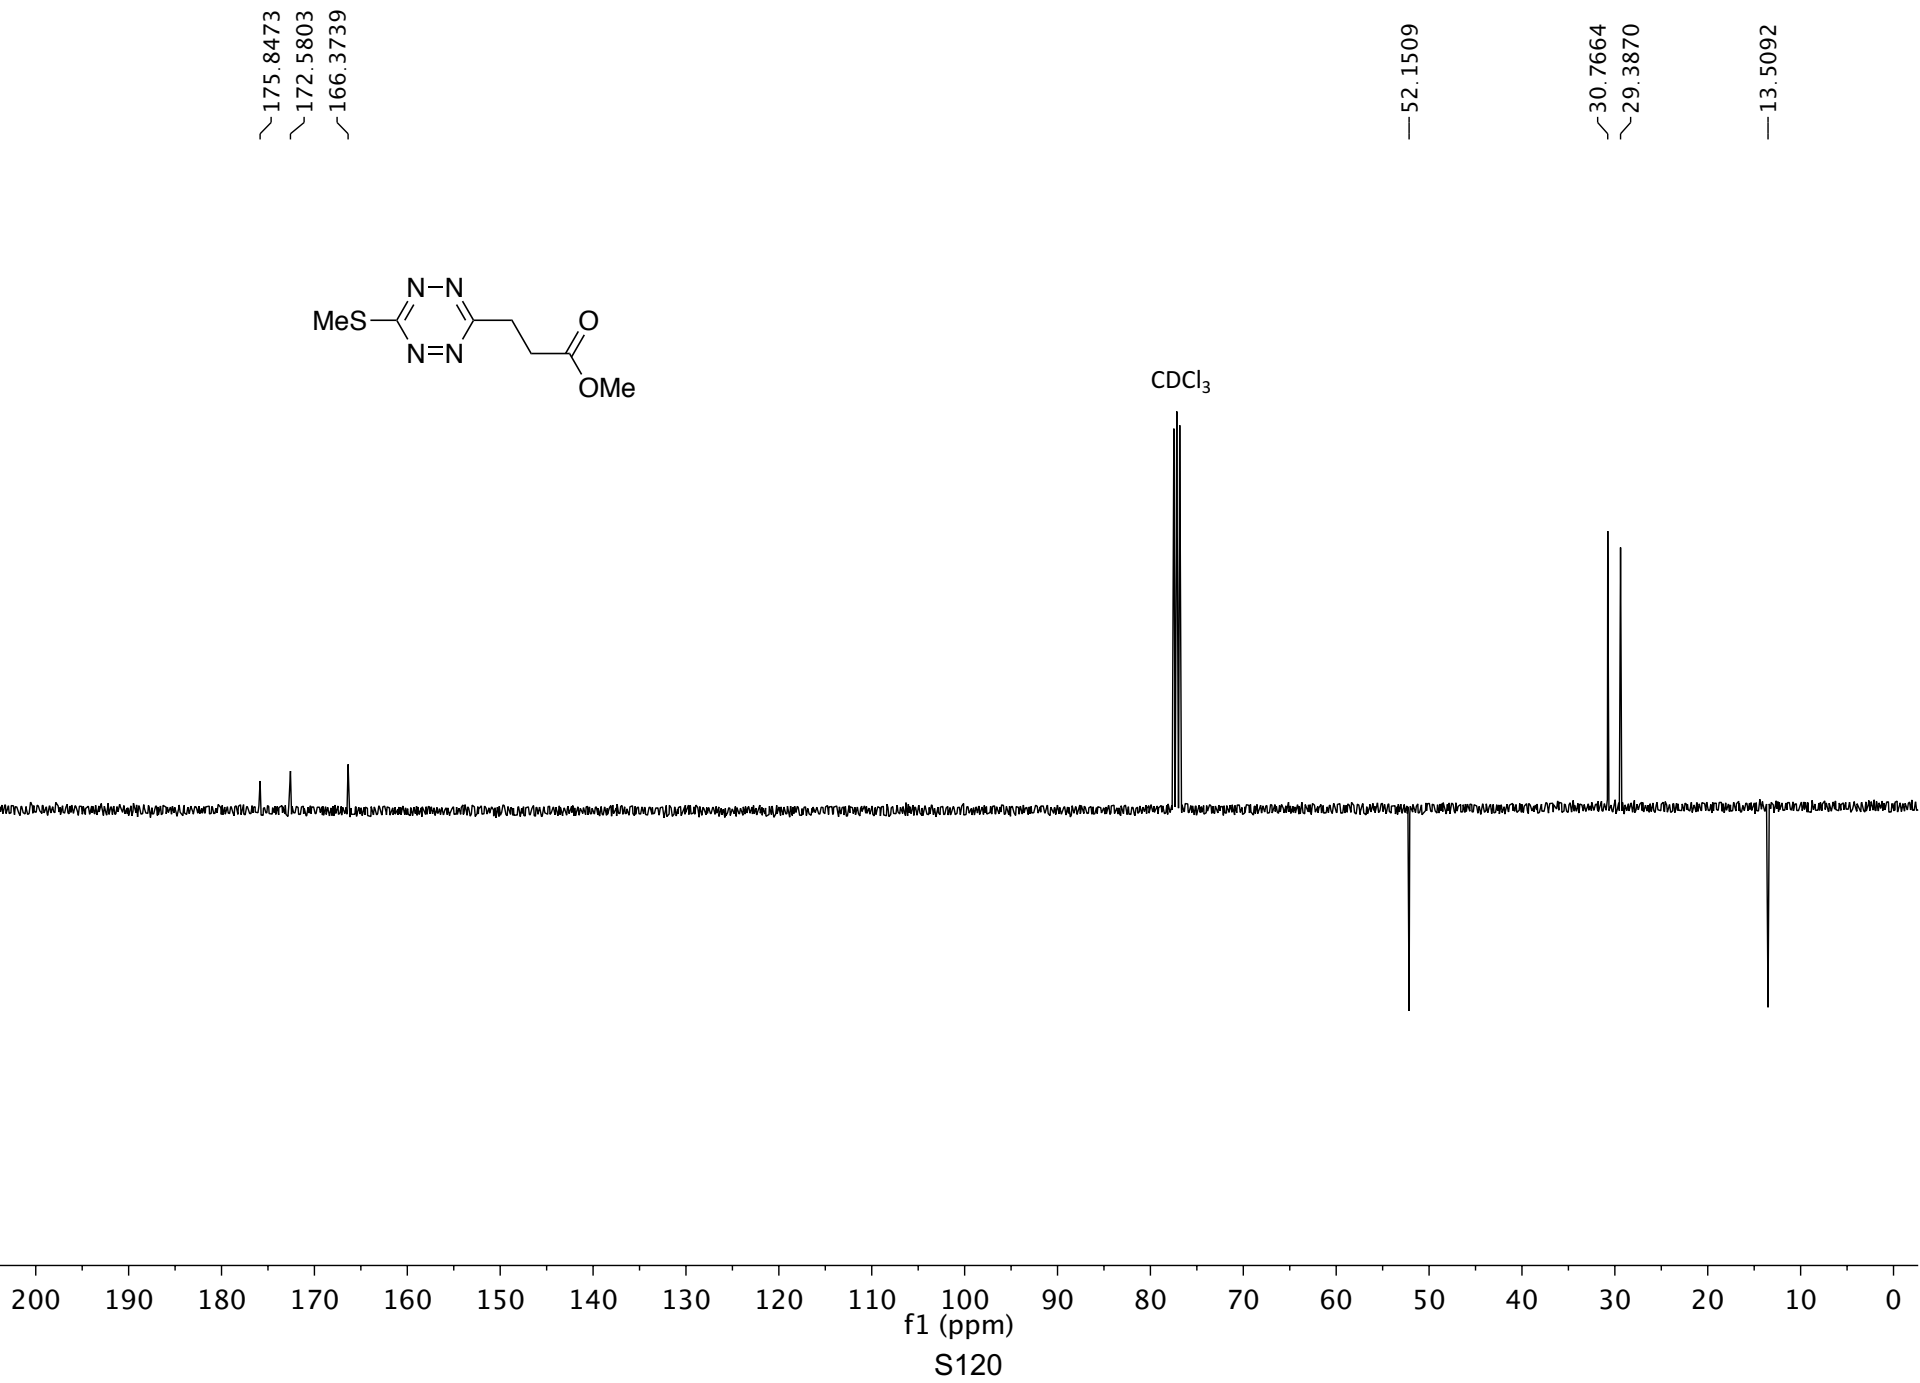



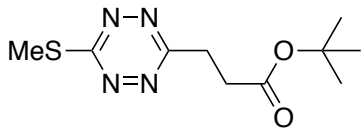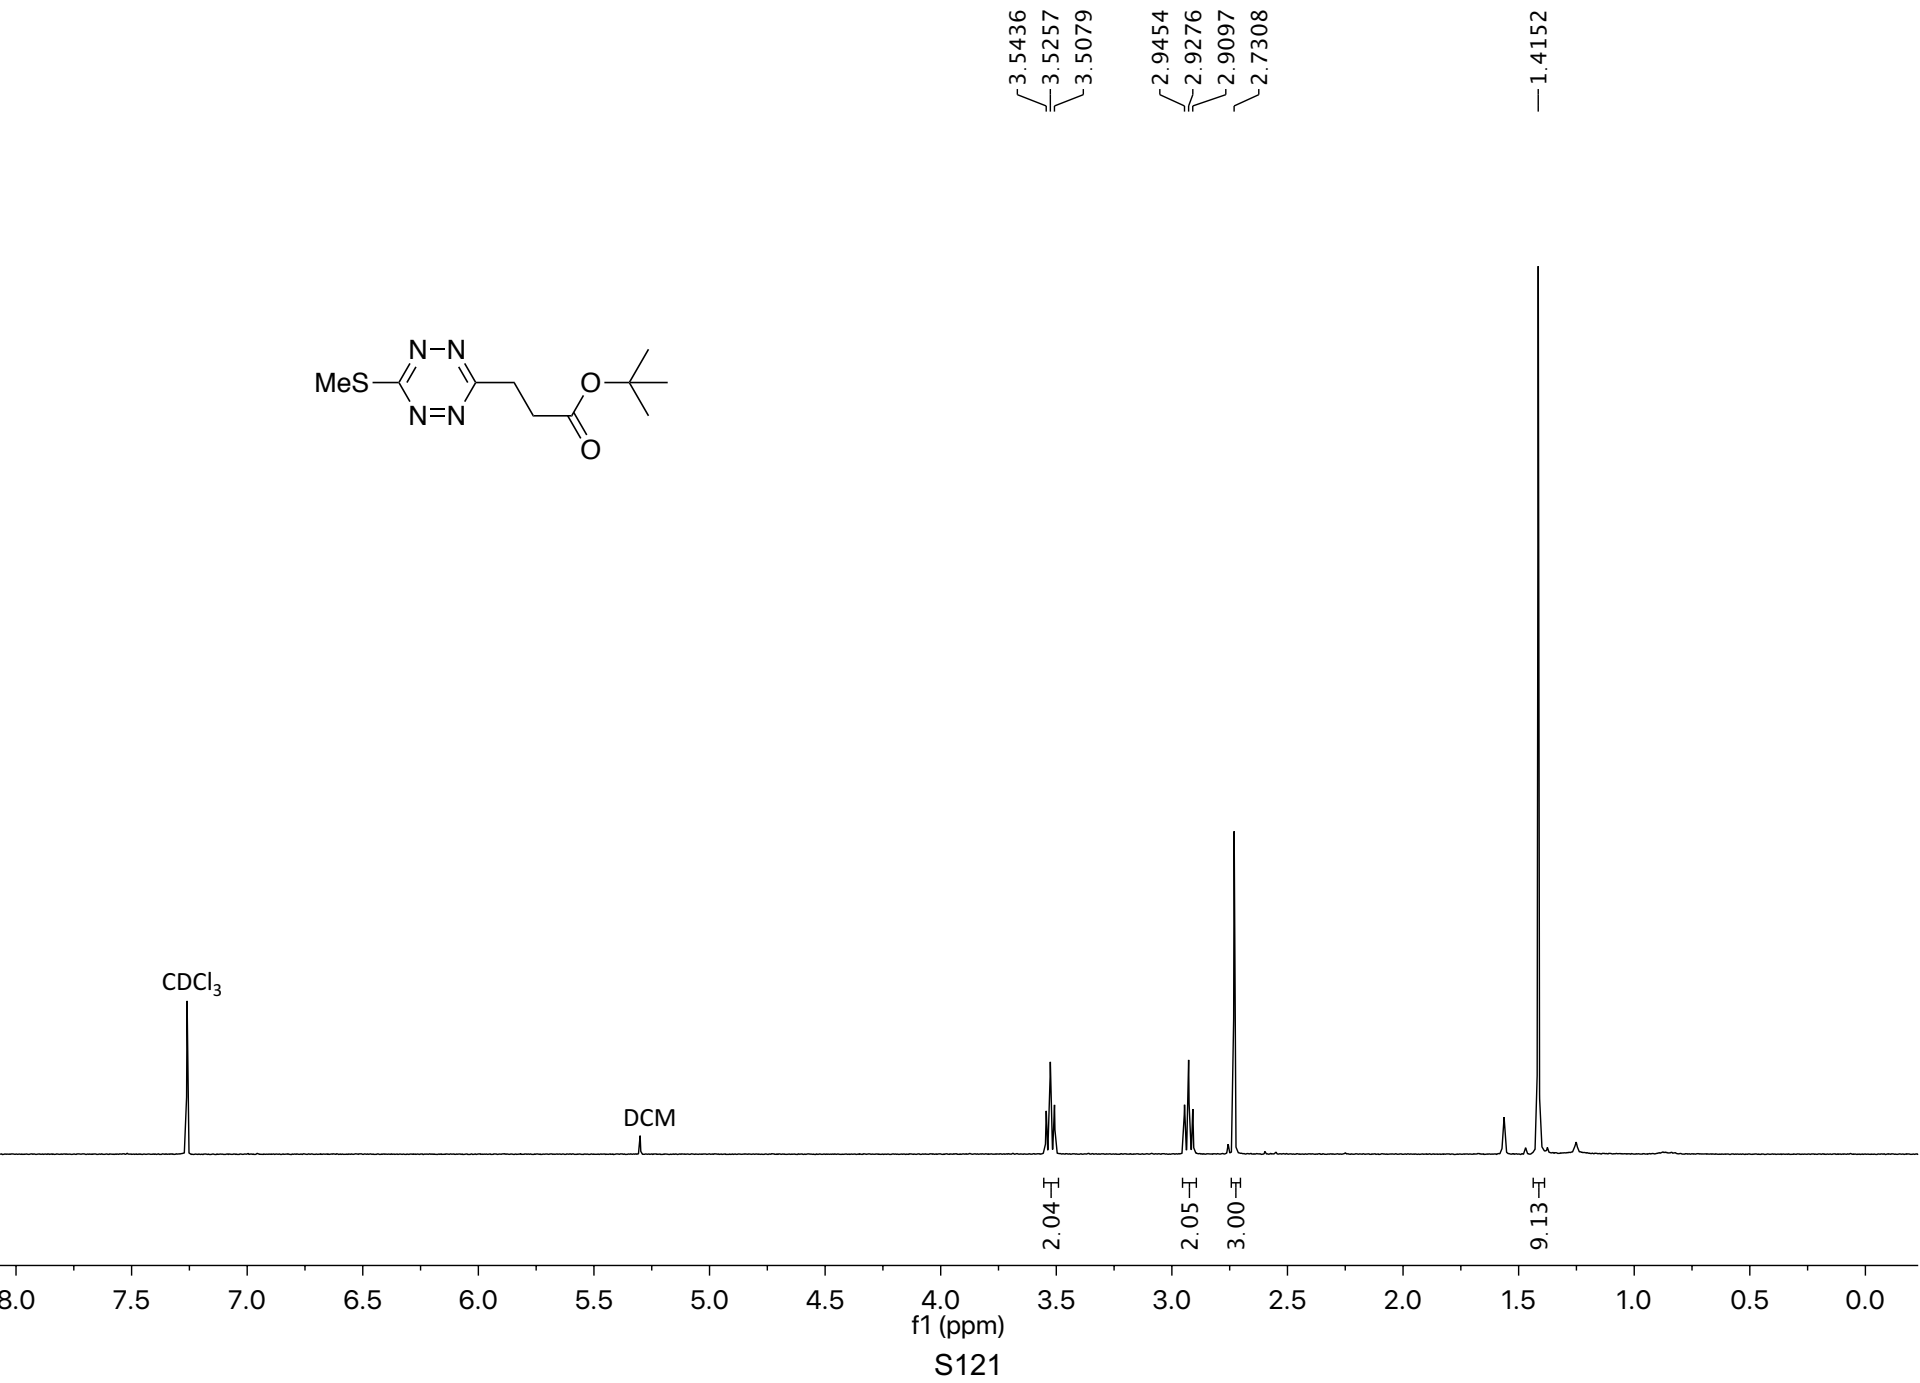

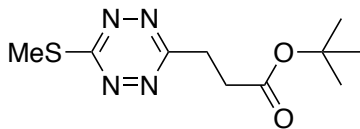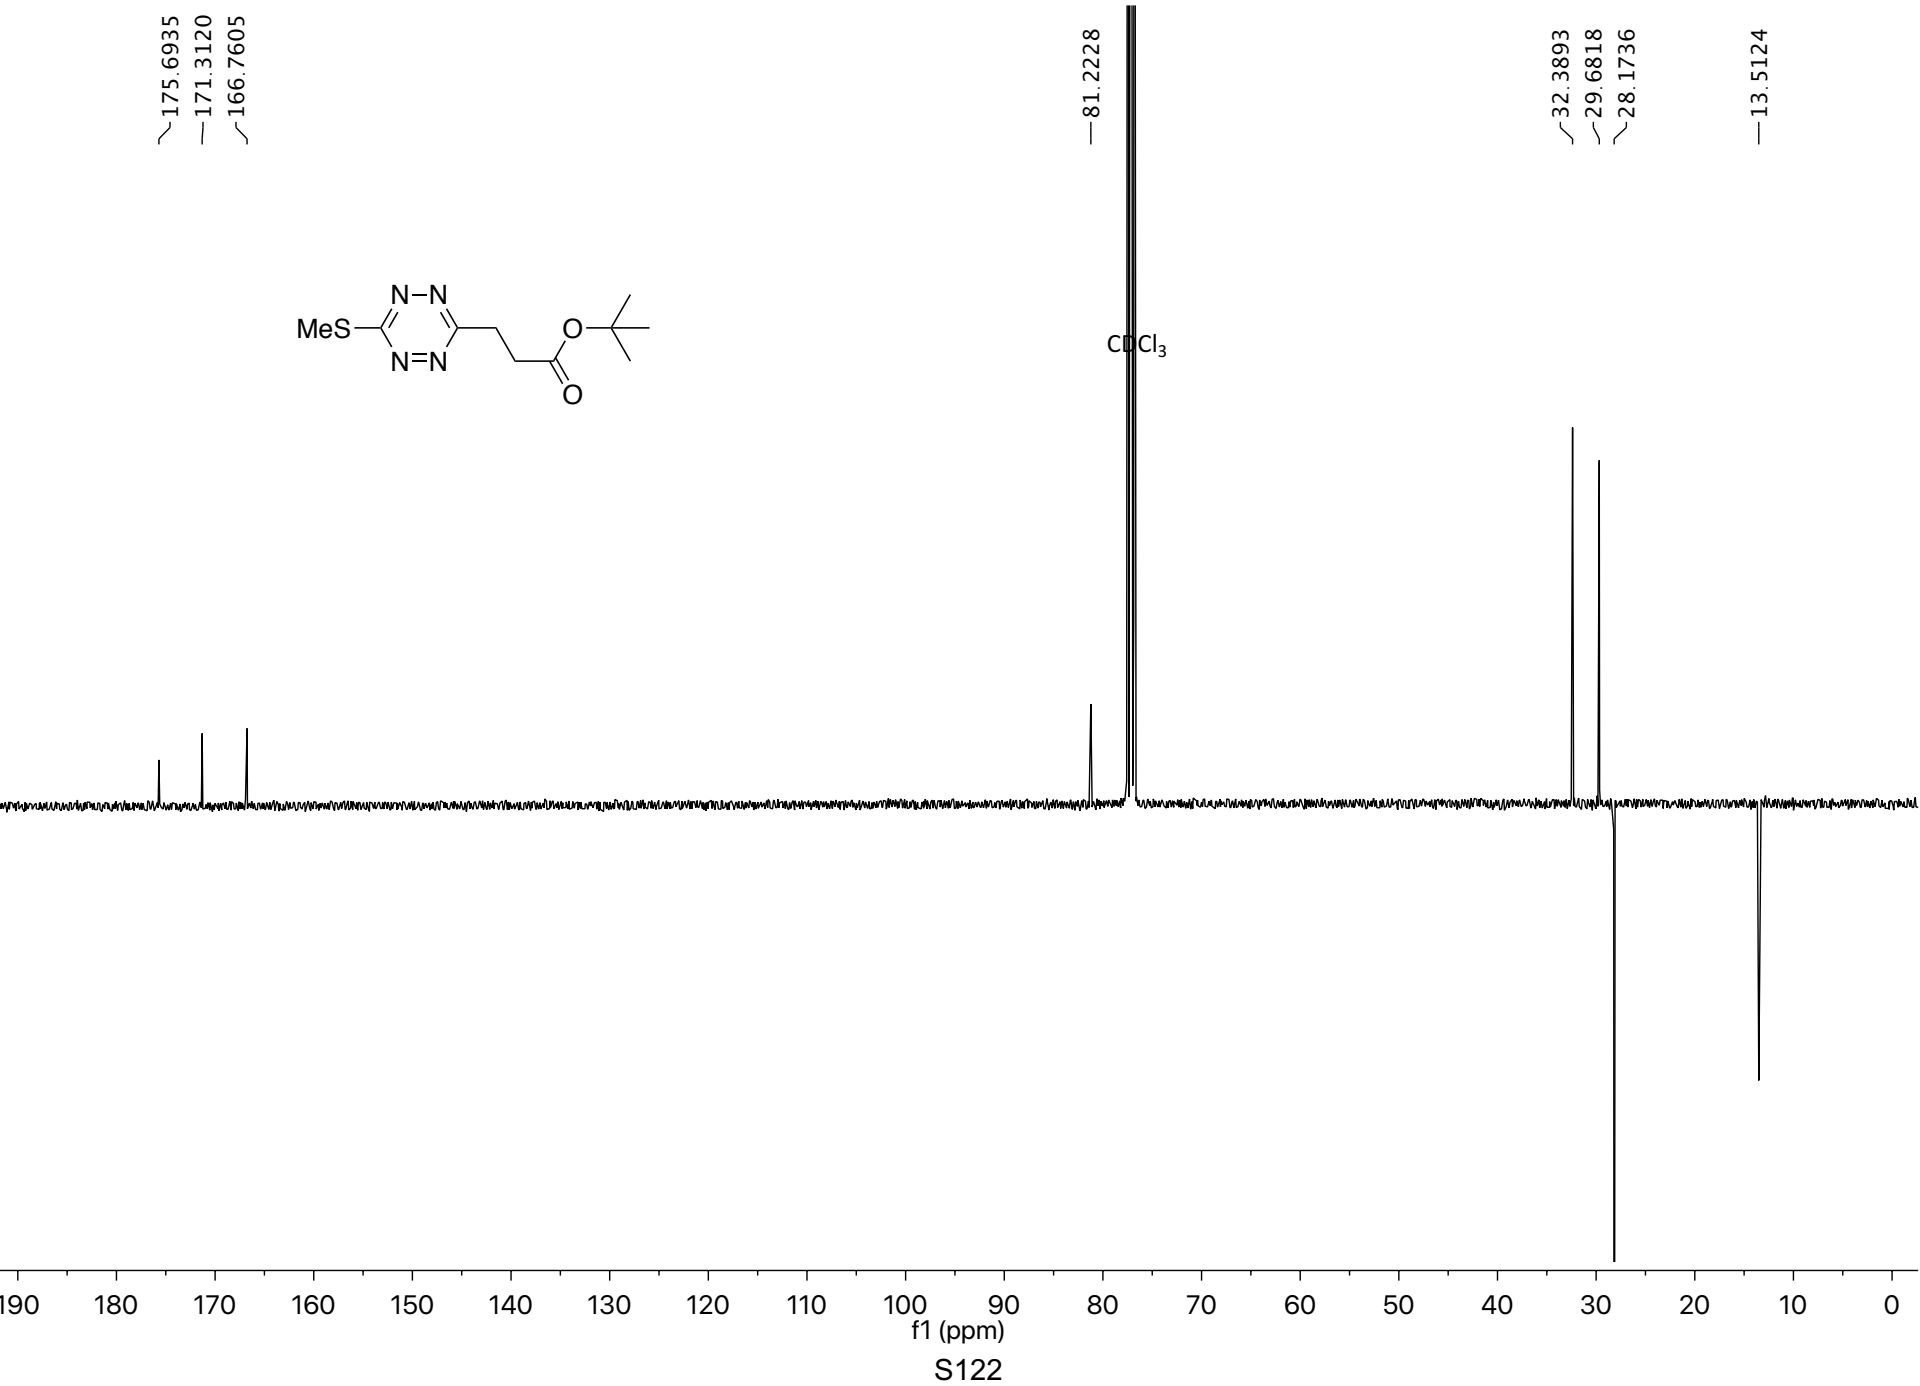

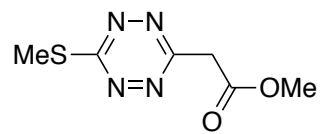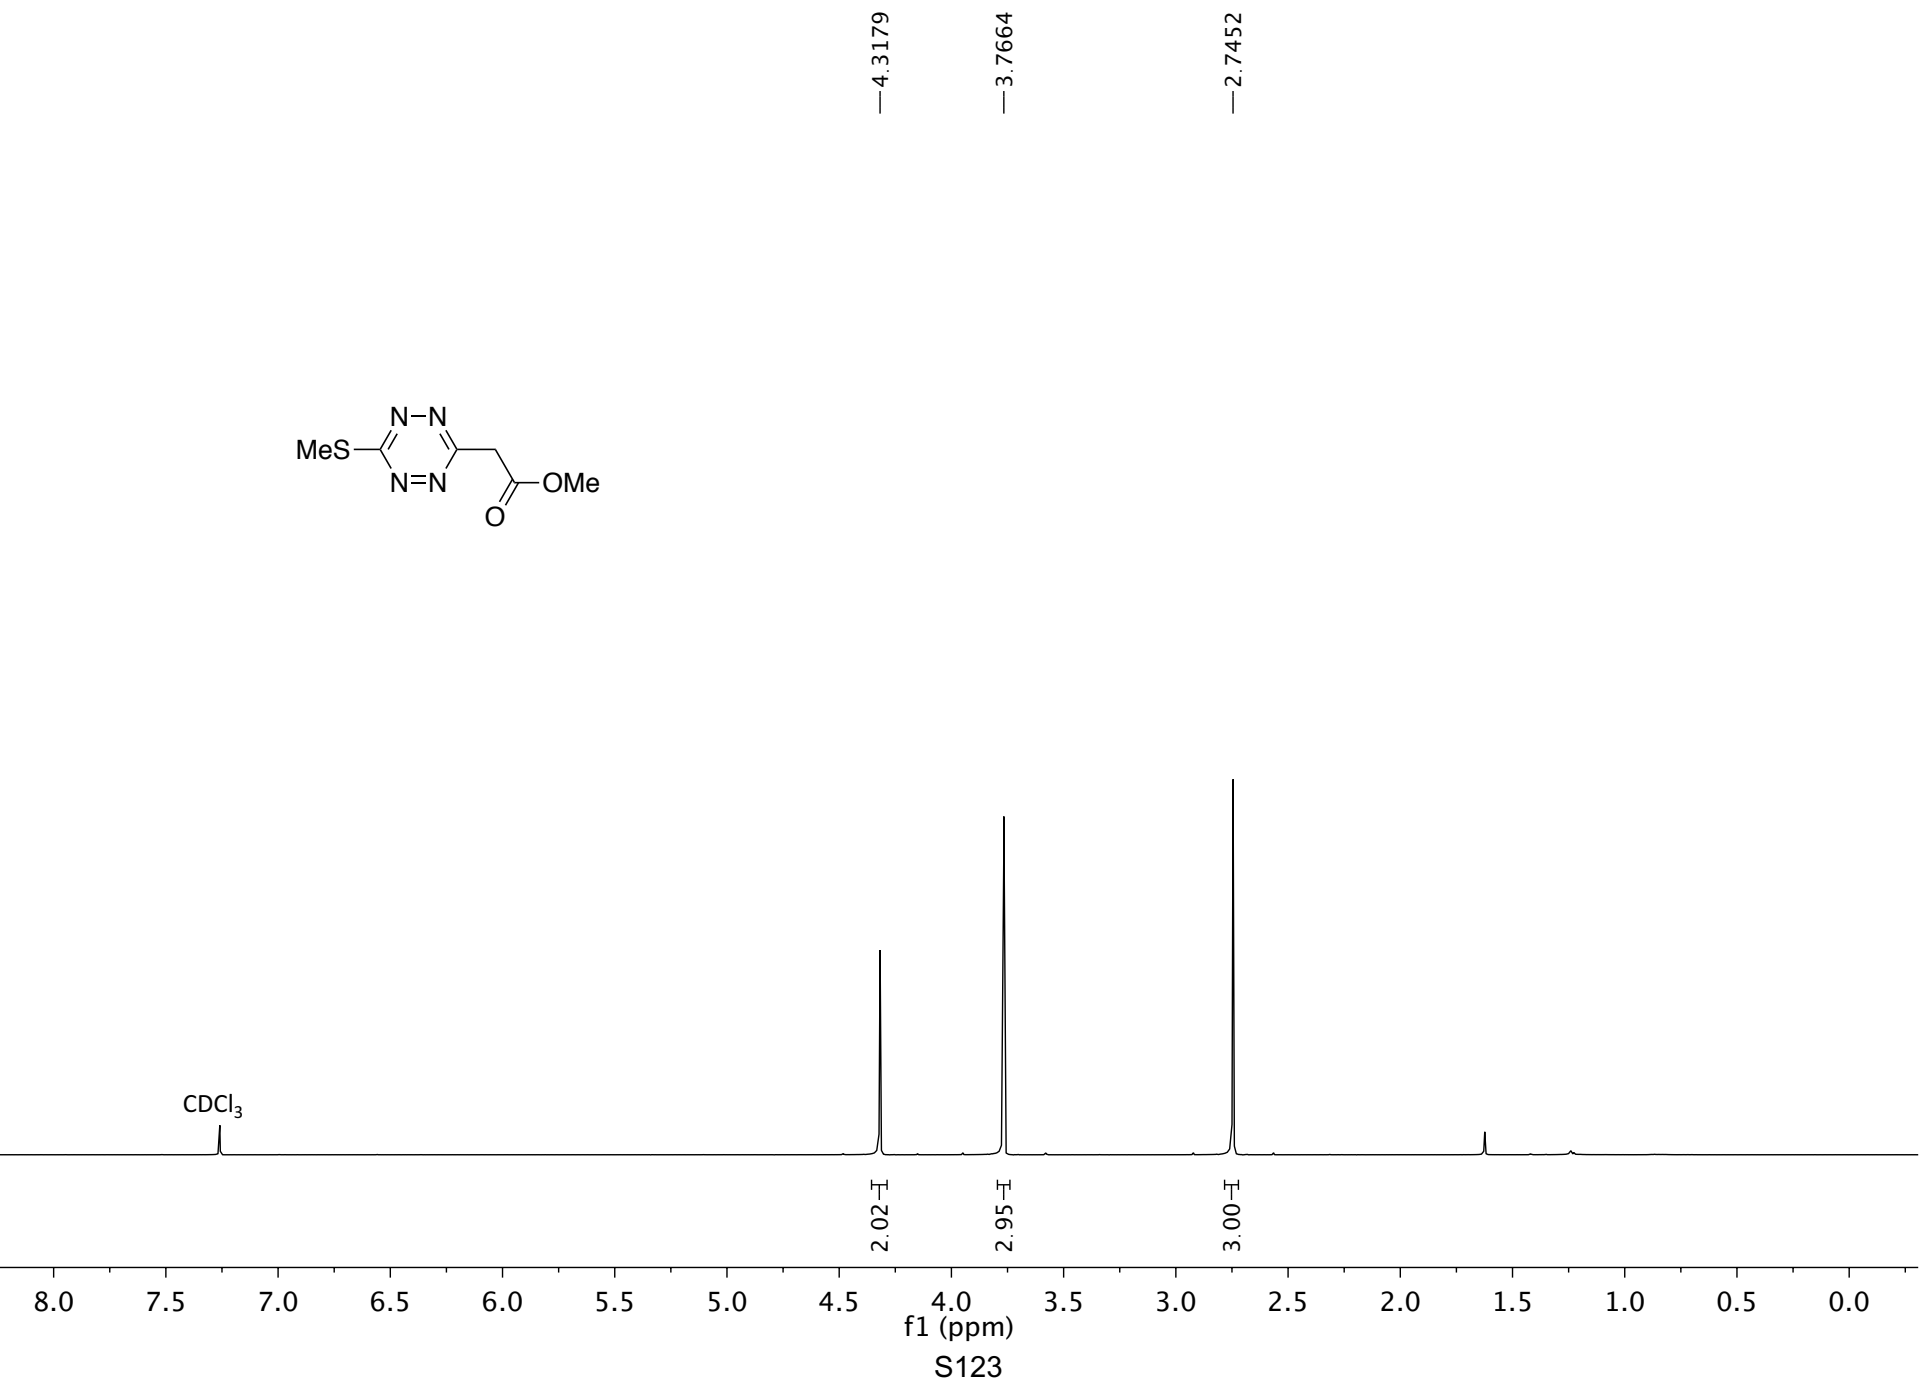

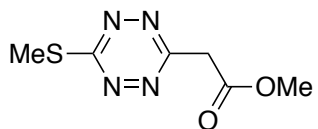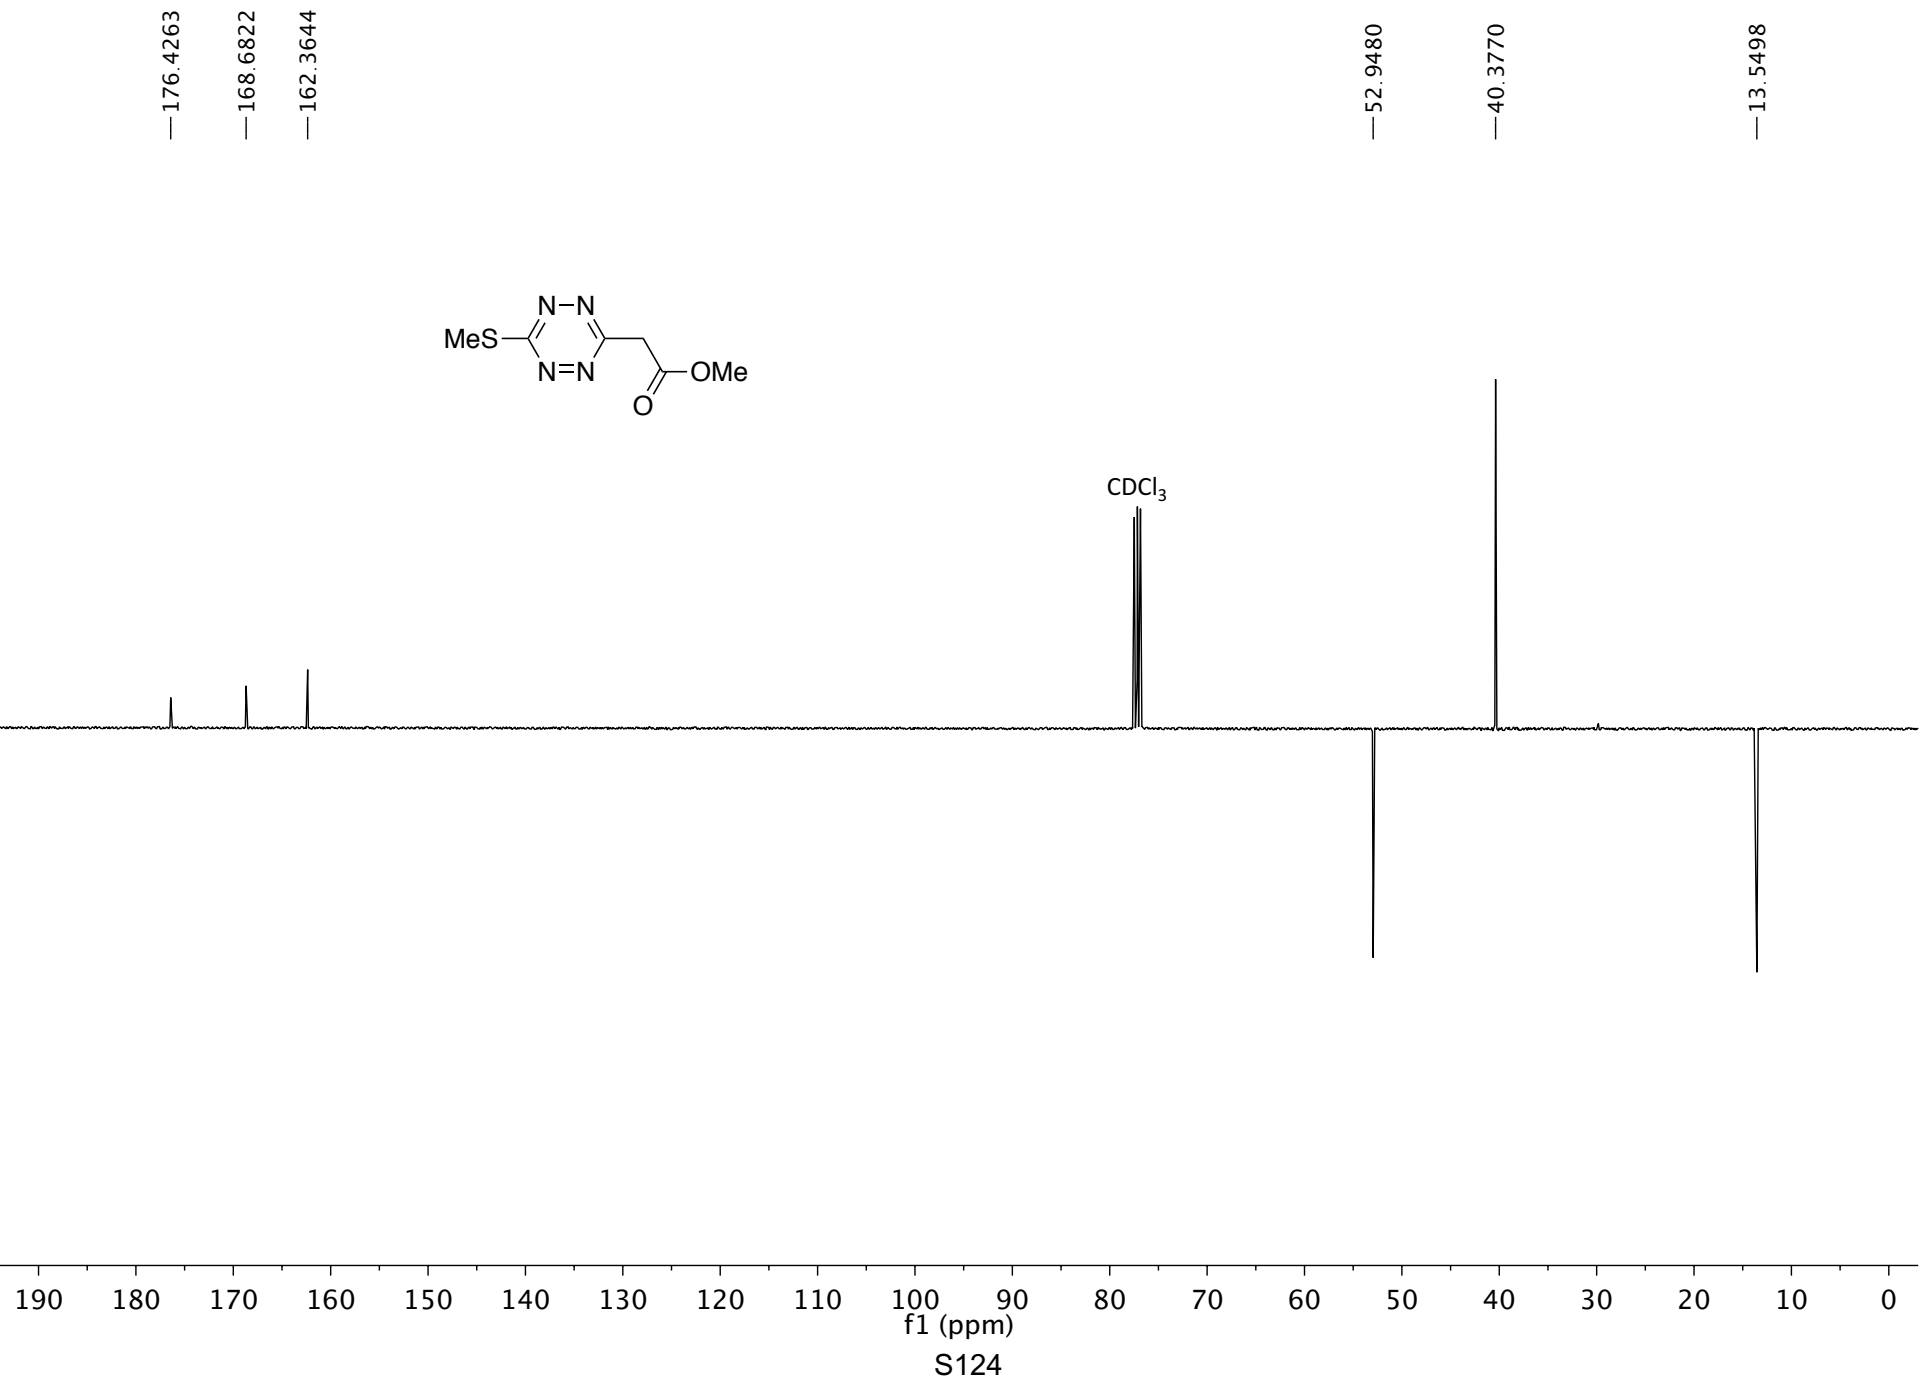

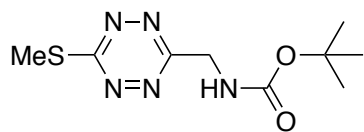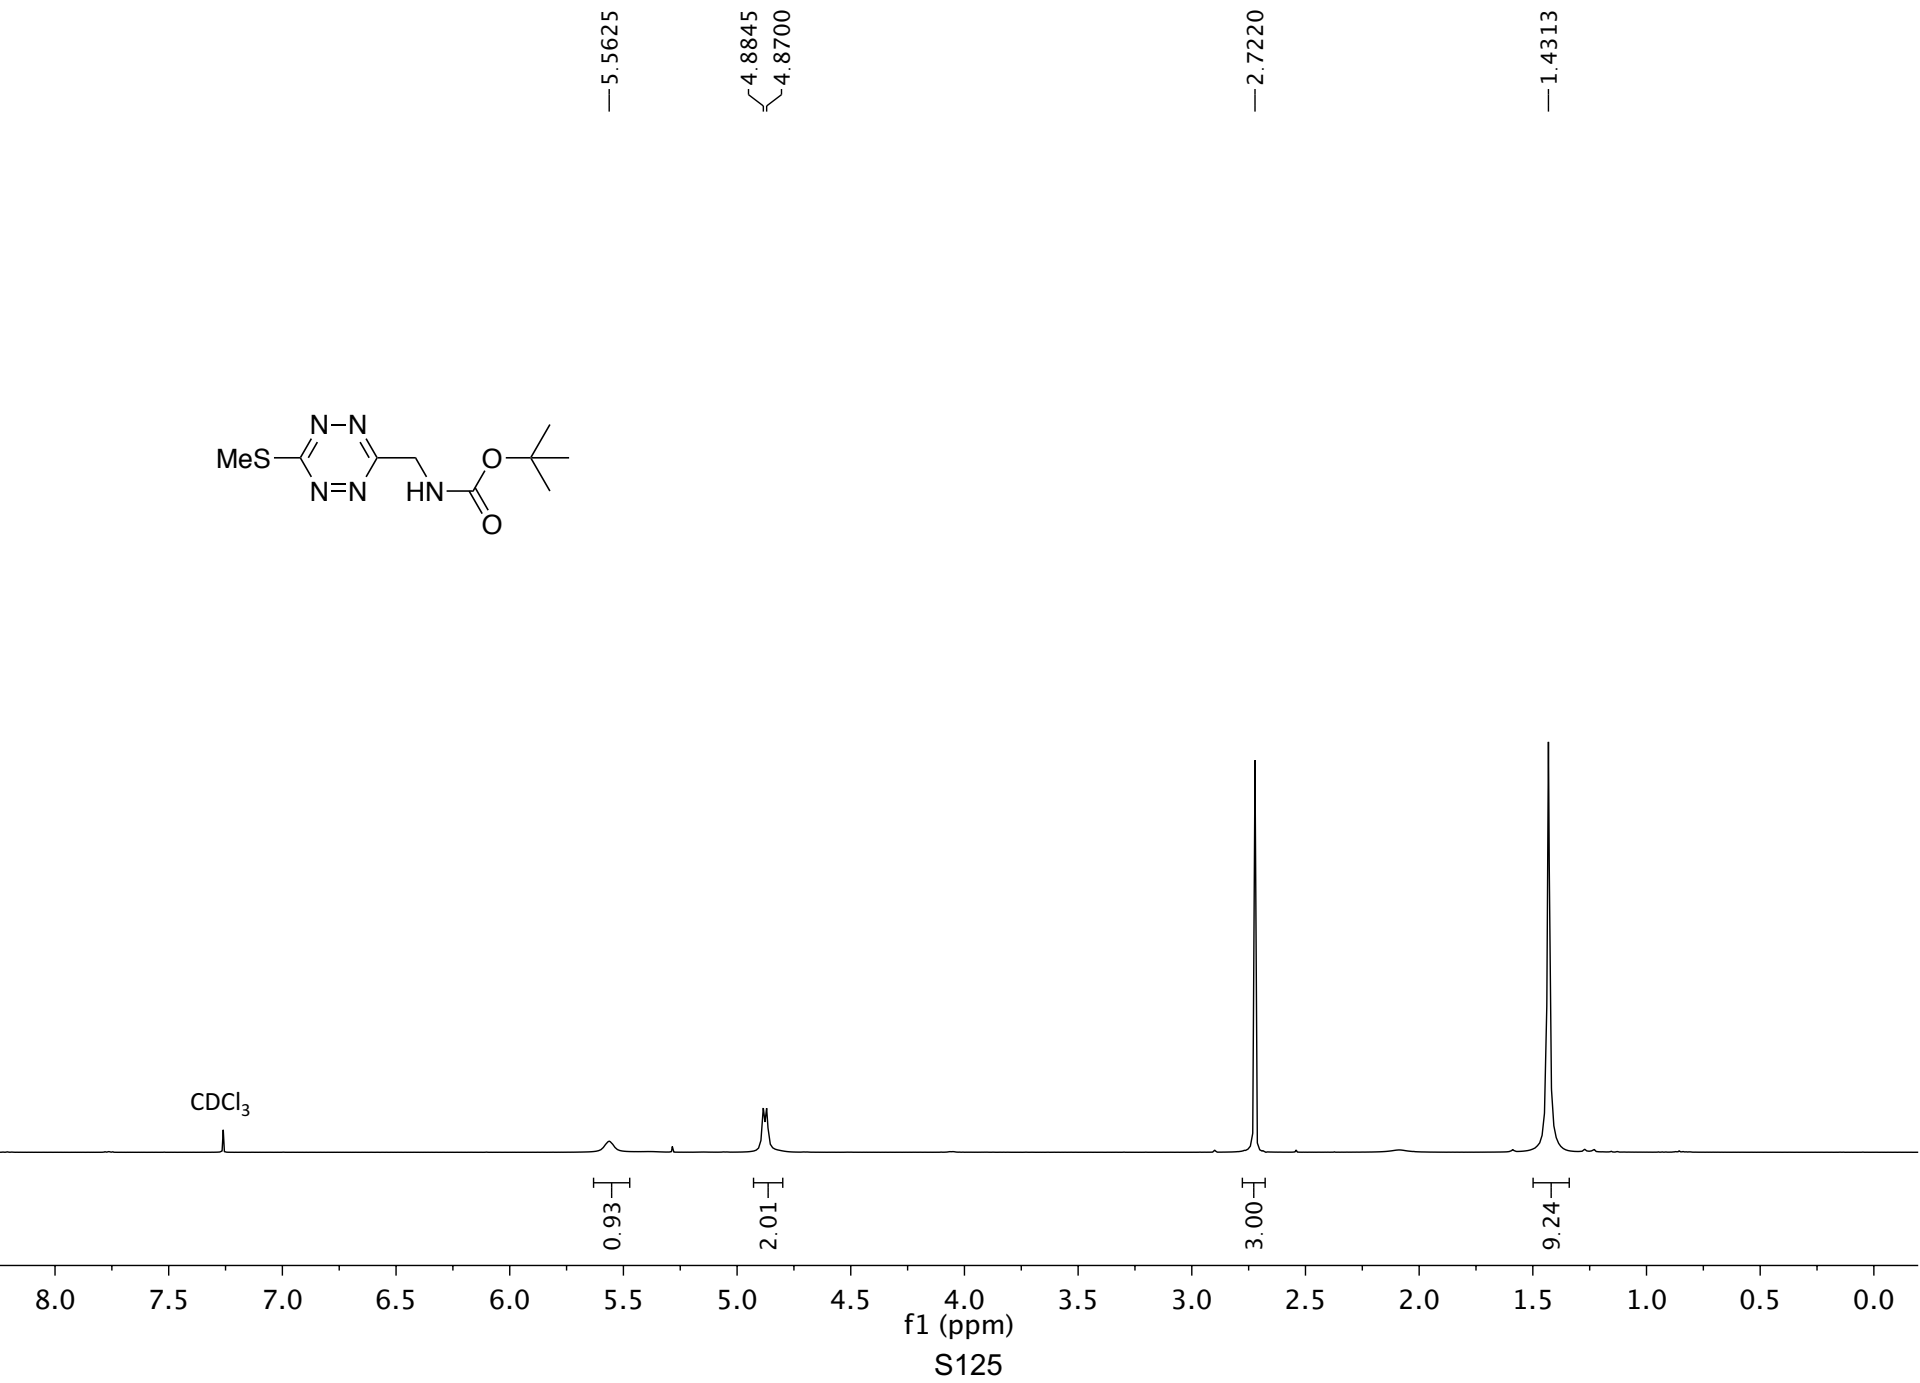

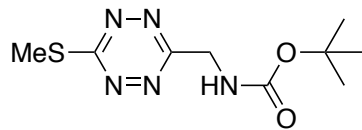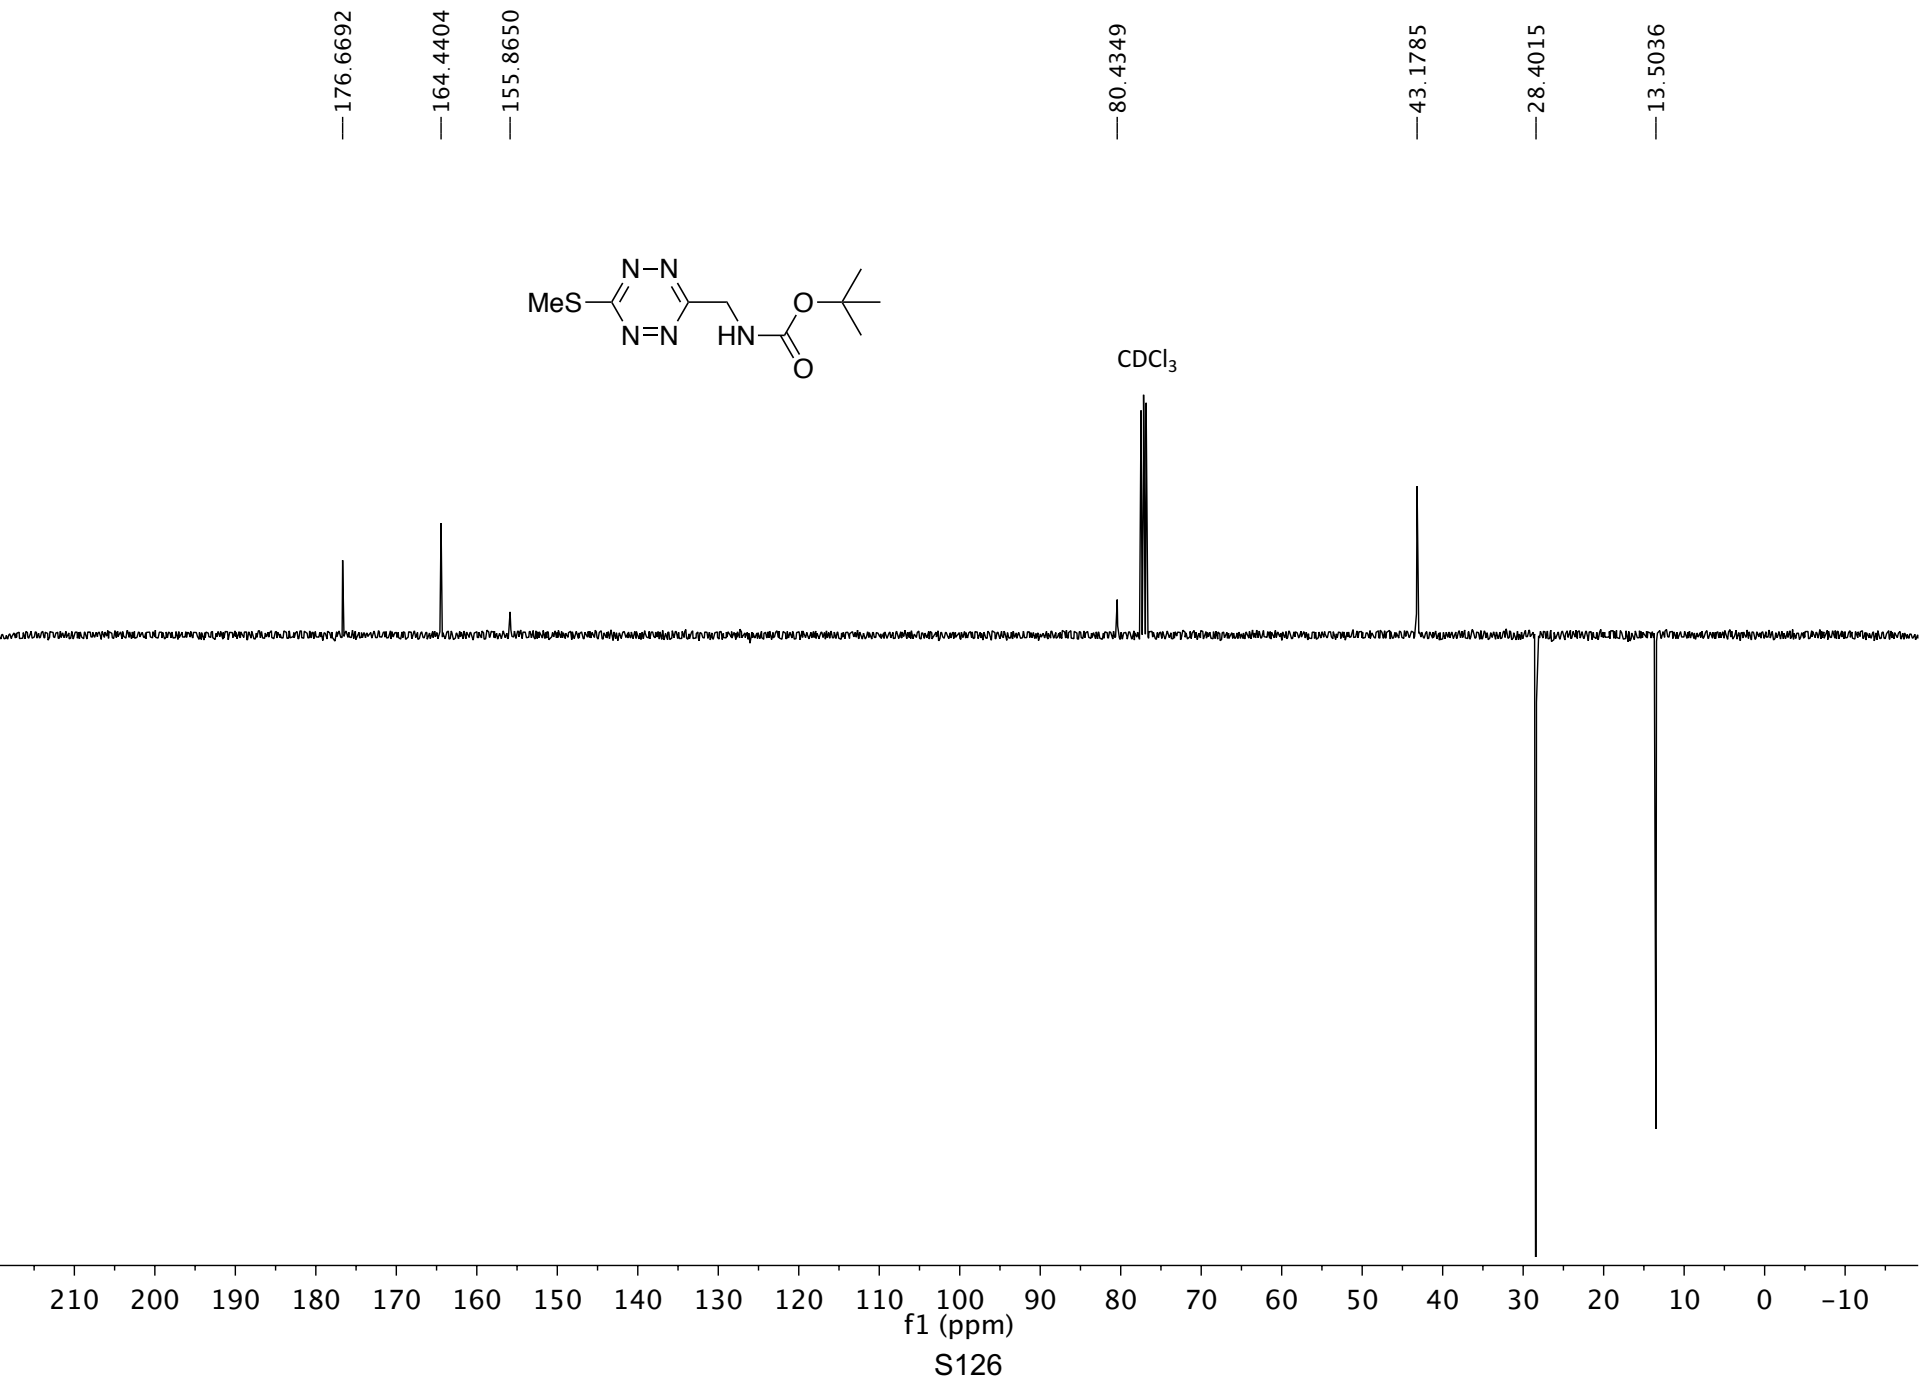

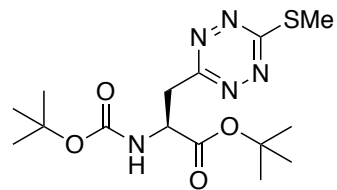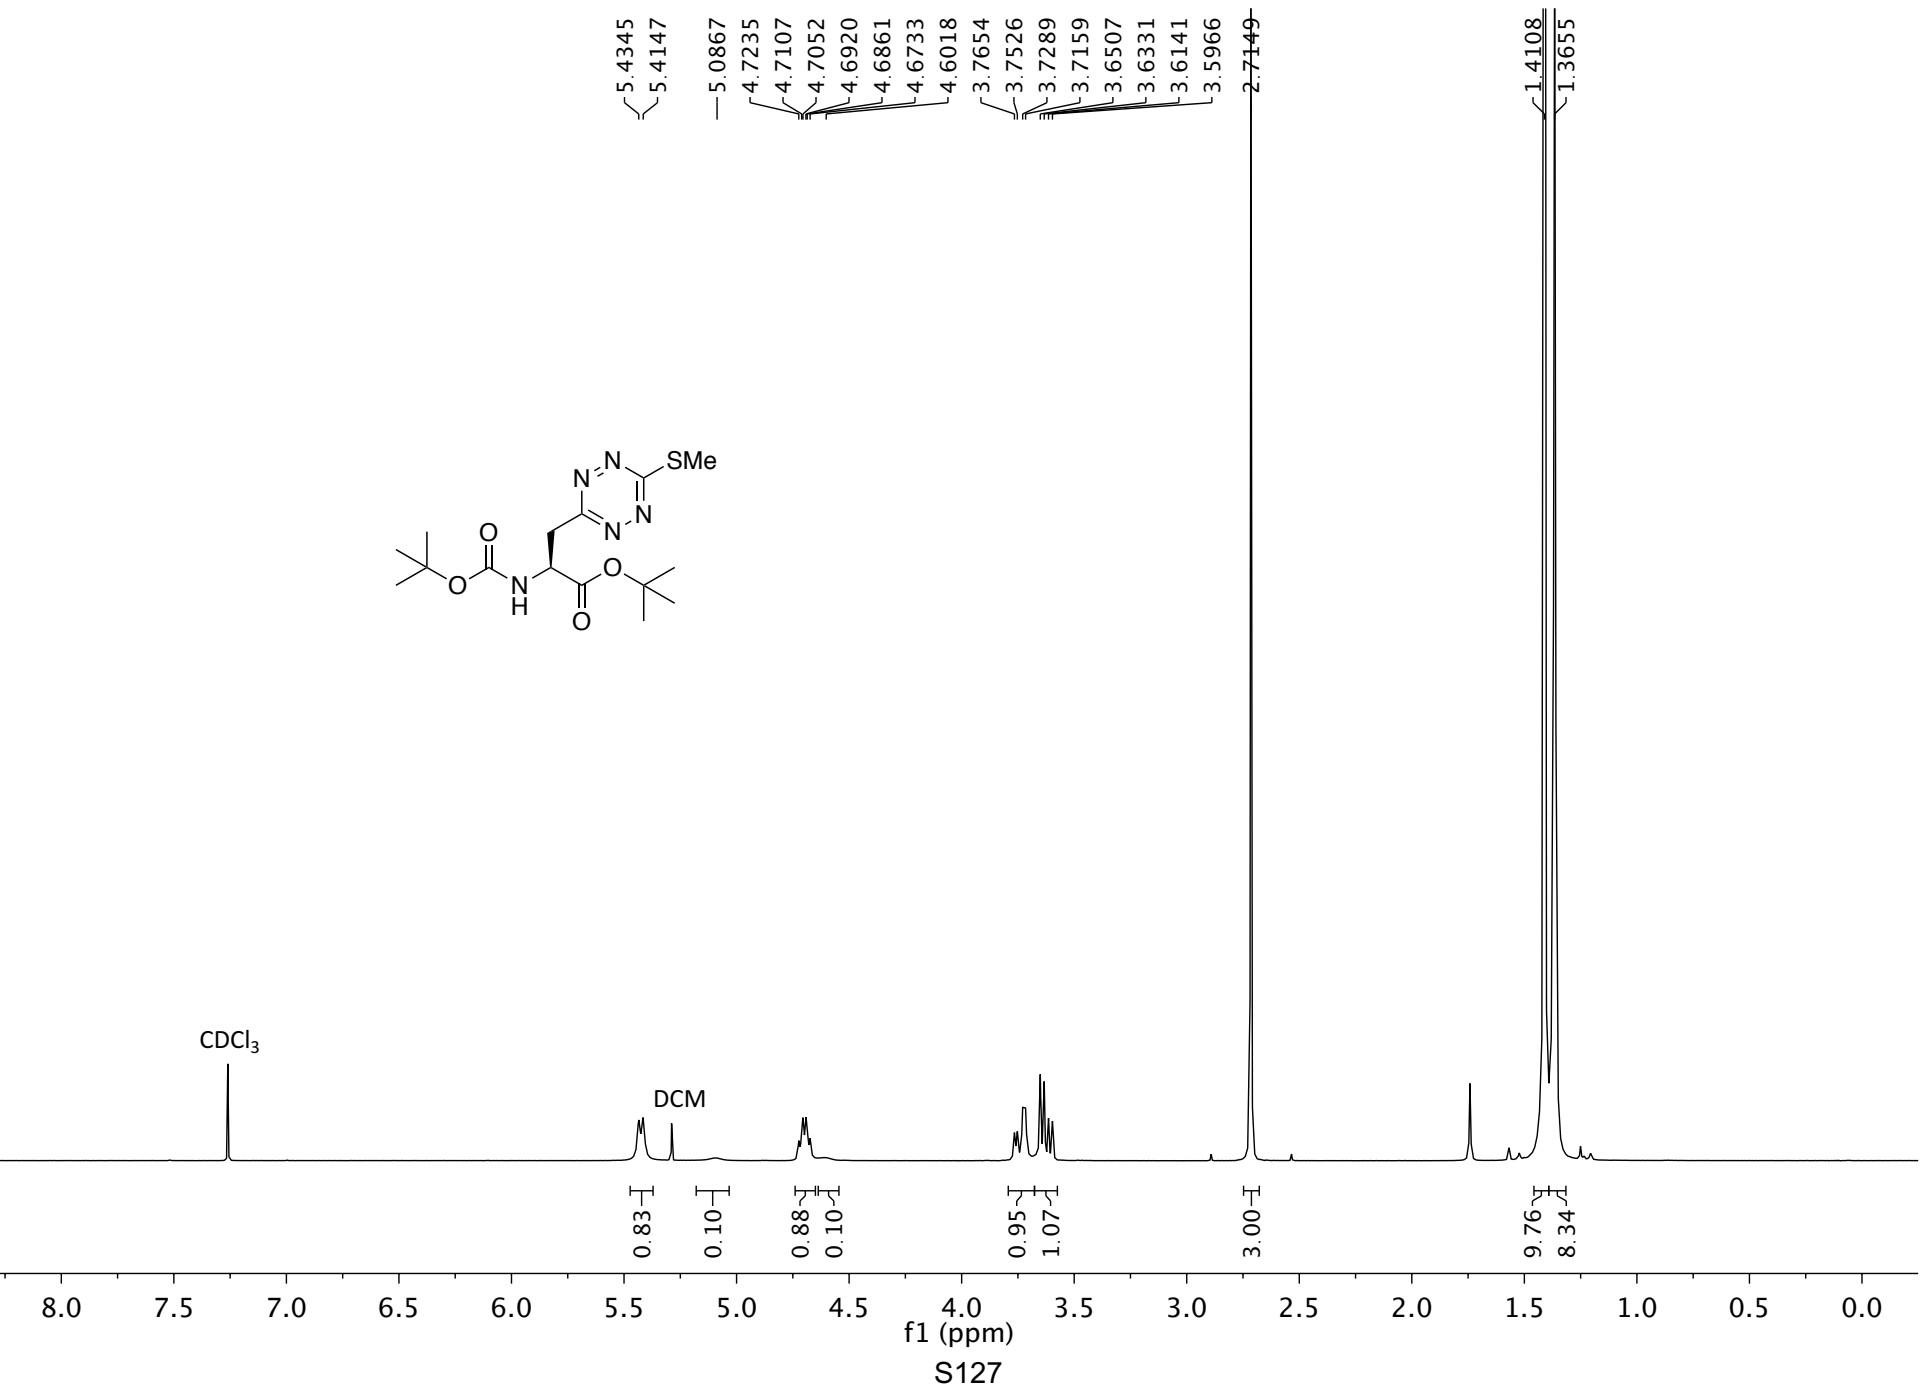

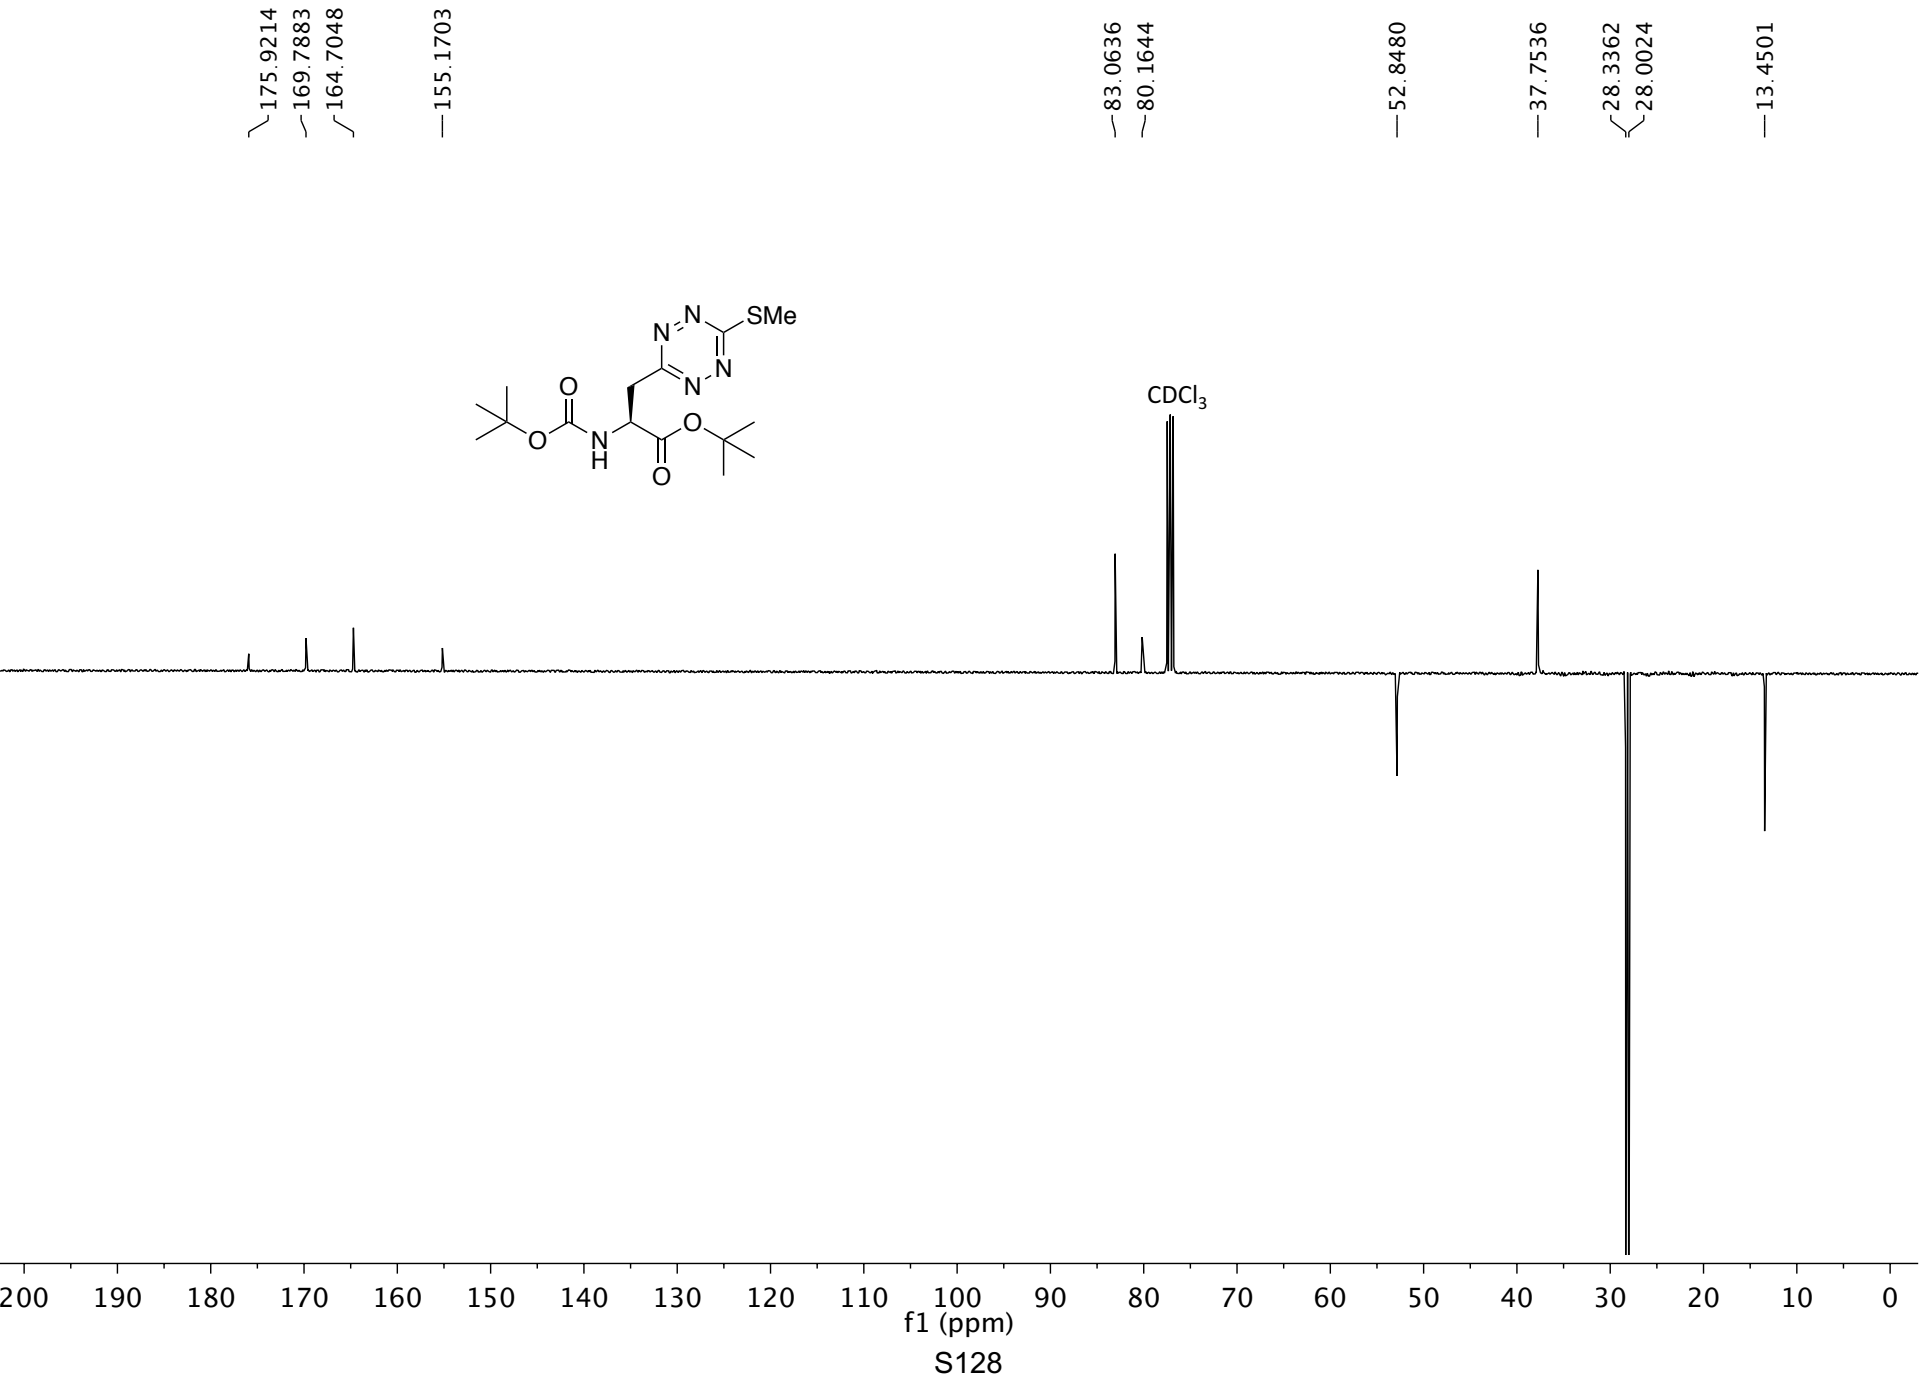



5.1529  
5.1324  
4.8951  
4.3792  
4.3674  
4.3595  
4.3469  
4.3390  
4.3268  
4.1837  
3.3926  
3.3770  
3.3677  
3.3543  
3.3393  
3.3301  
3.3153  
3.3014  
3.2910  
3.2770  
3.2637  
3.2534  
3.2389  
2.7239  
2.5158  
2.5017  
2.4890  
2.4790  
2.4658  
2.4550  
2.4419  
2.4274  
2.2414  
2.2265  
2.2210  
2.2159  
2.2071  
2.2016  
2.1965  
2.1917  
2.1866  
2.1820  
2.1724  
2.1667  
2.1621  
2.1478  
1.4710  
1.4280

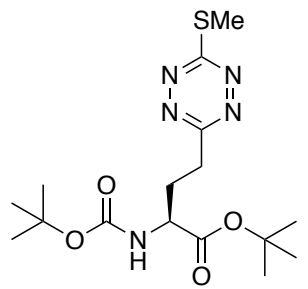

CDCl<sub>3</sub>

DCM

8.0 7.5 7.0 6.5 6.0 5.5 5.0 4.5 4.0 3.5 3.0 2.5 2.0 1.5 1.0 0.5 0.0

f1 (ppm)

S129

0.85 0.12 0.86 0.13 2.02 3.00 1.01 1.01 9.11 8.94

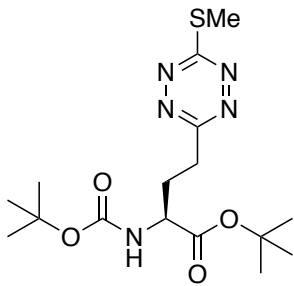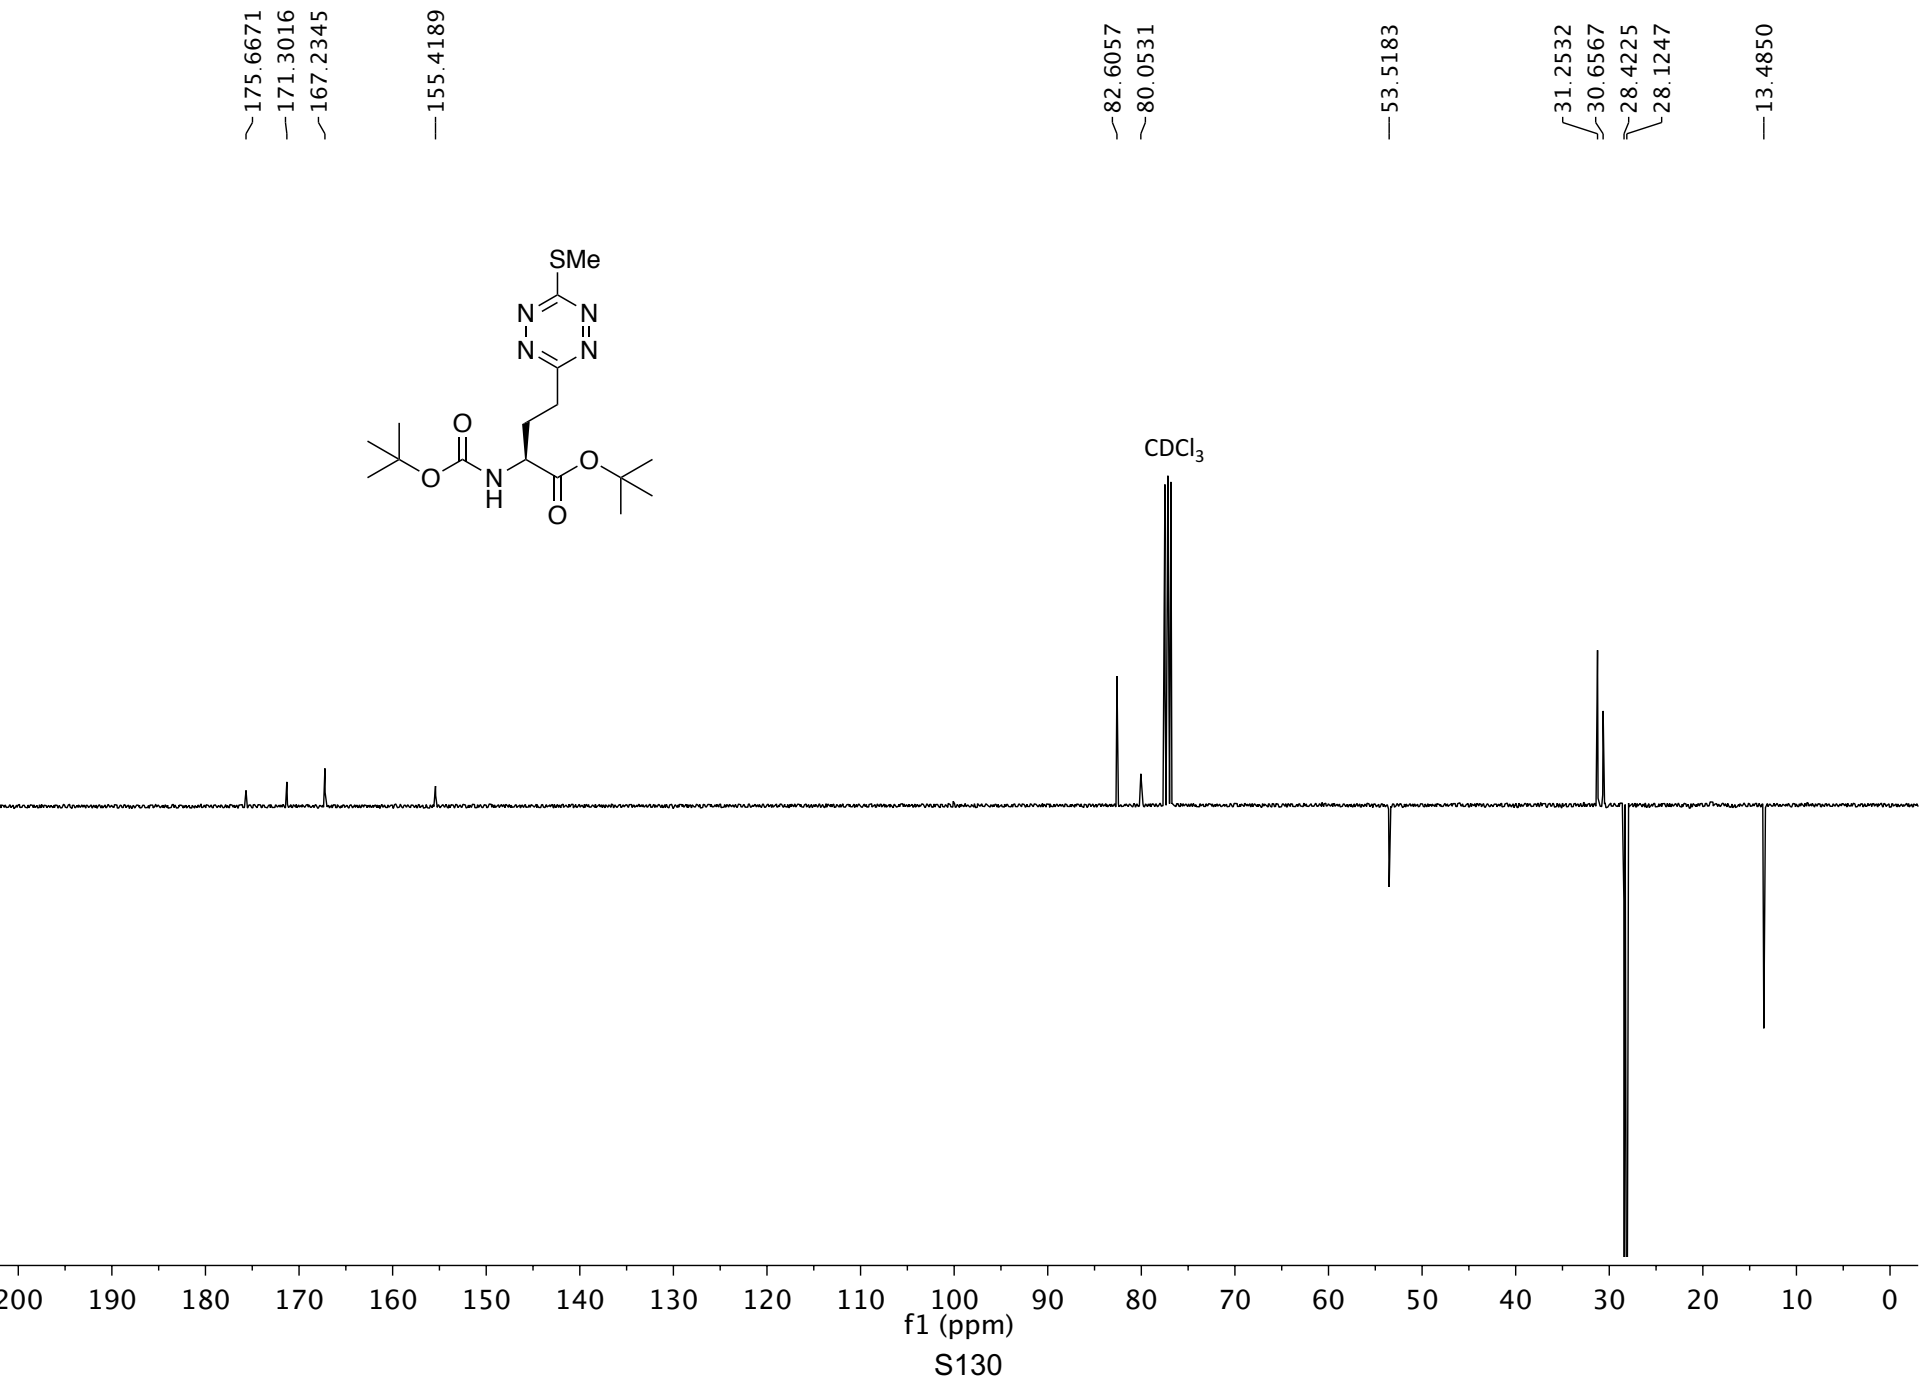

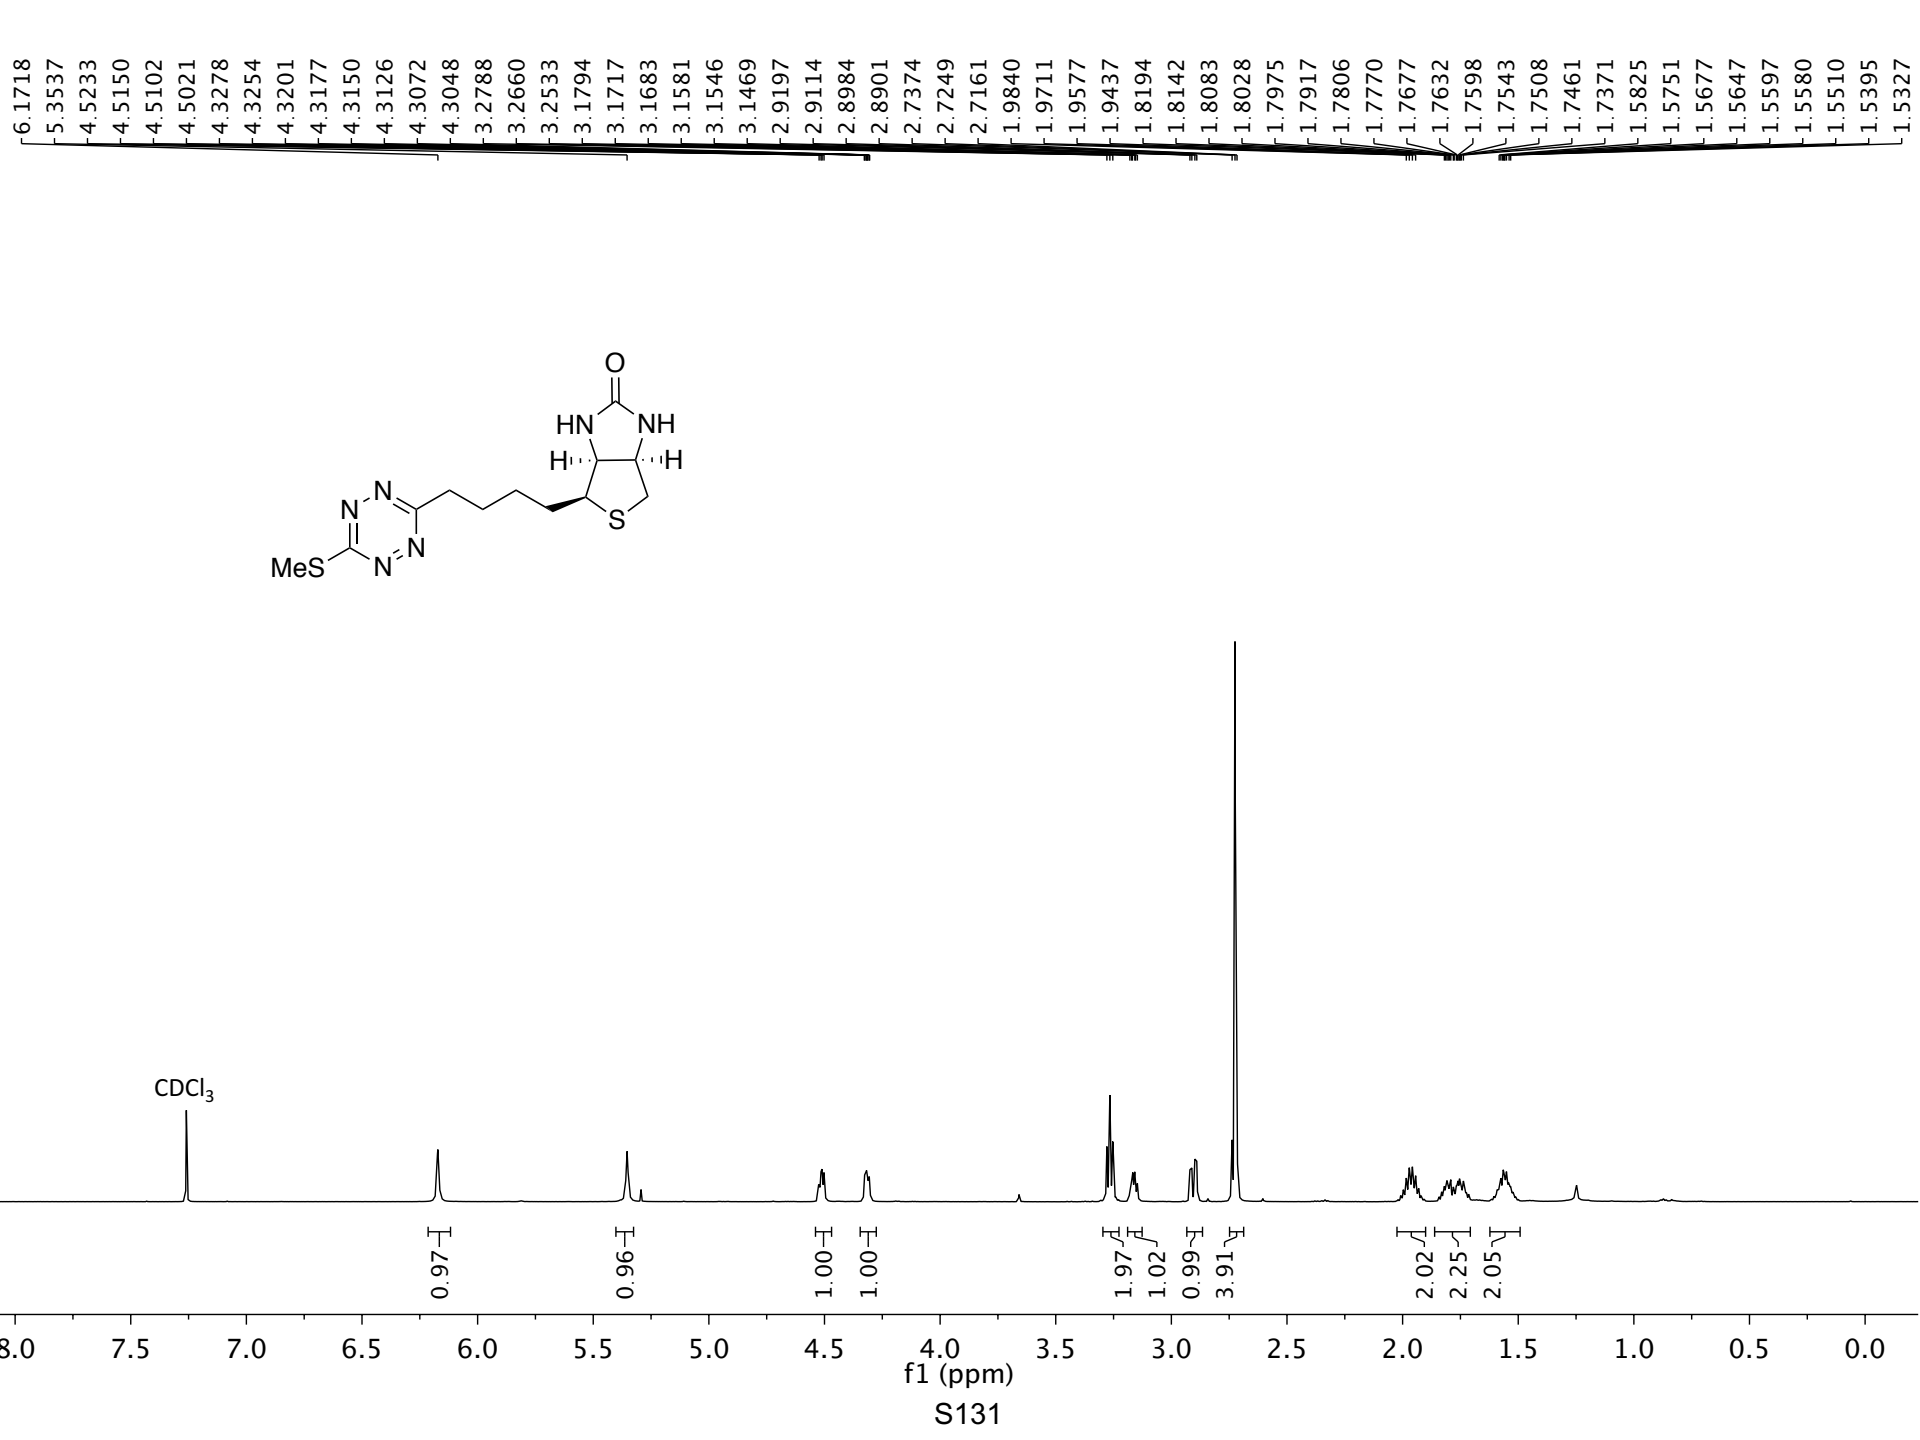

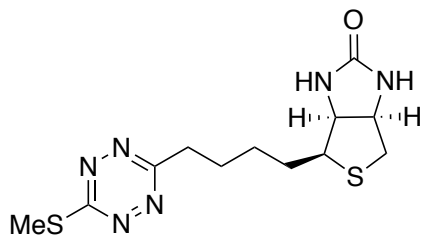

175.5383  
167.9021  
163.8438

61.9953  
60.2324  
55.6334

40.6923  
34.0145  
29.8294  
28.4044  
28.3748  
28.3583

13.5067

CDCl<sub>3</sub>

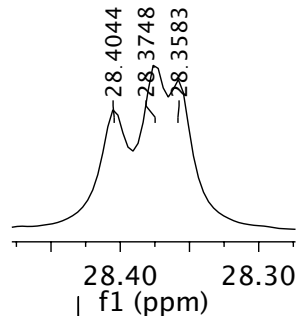

210 200 190 180 170 160 150 140 130 120 110 100 90 80 70 60 50 40 30 20 10 0 -10

f1 (ppm)

S132

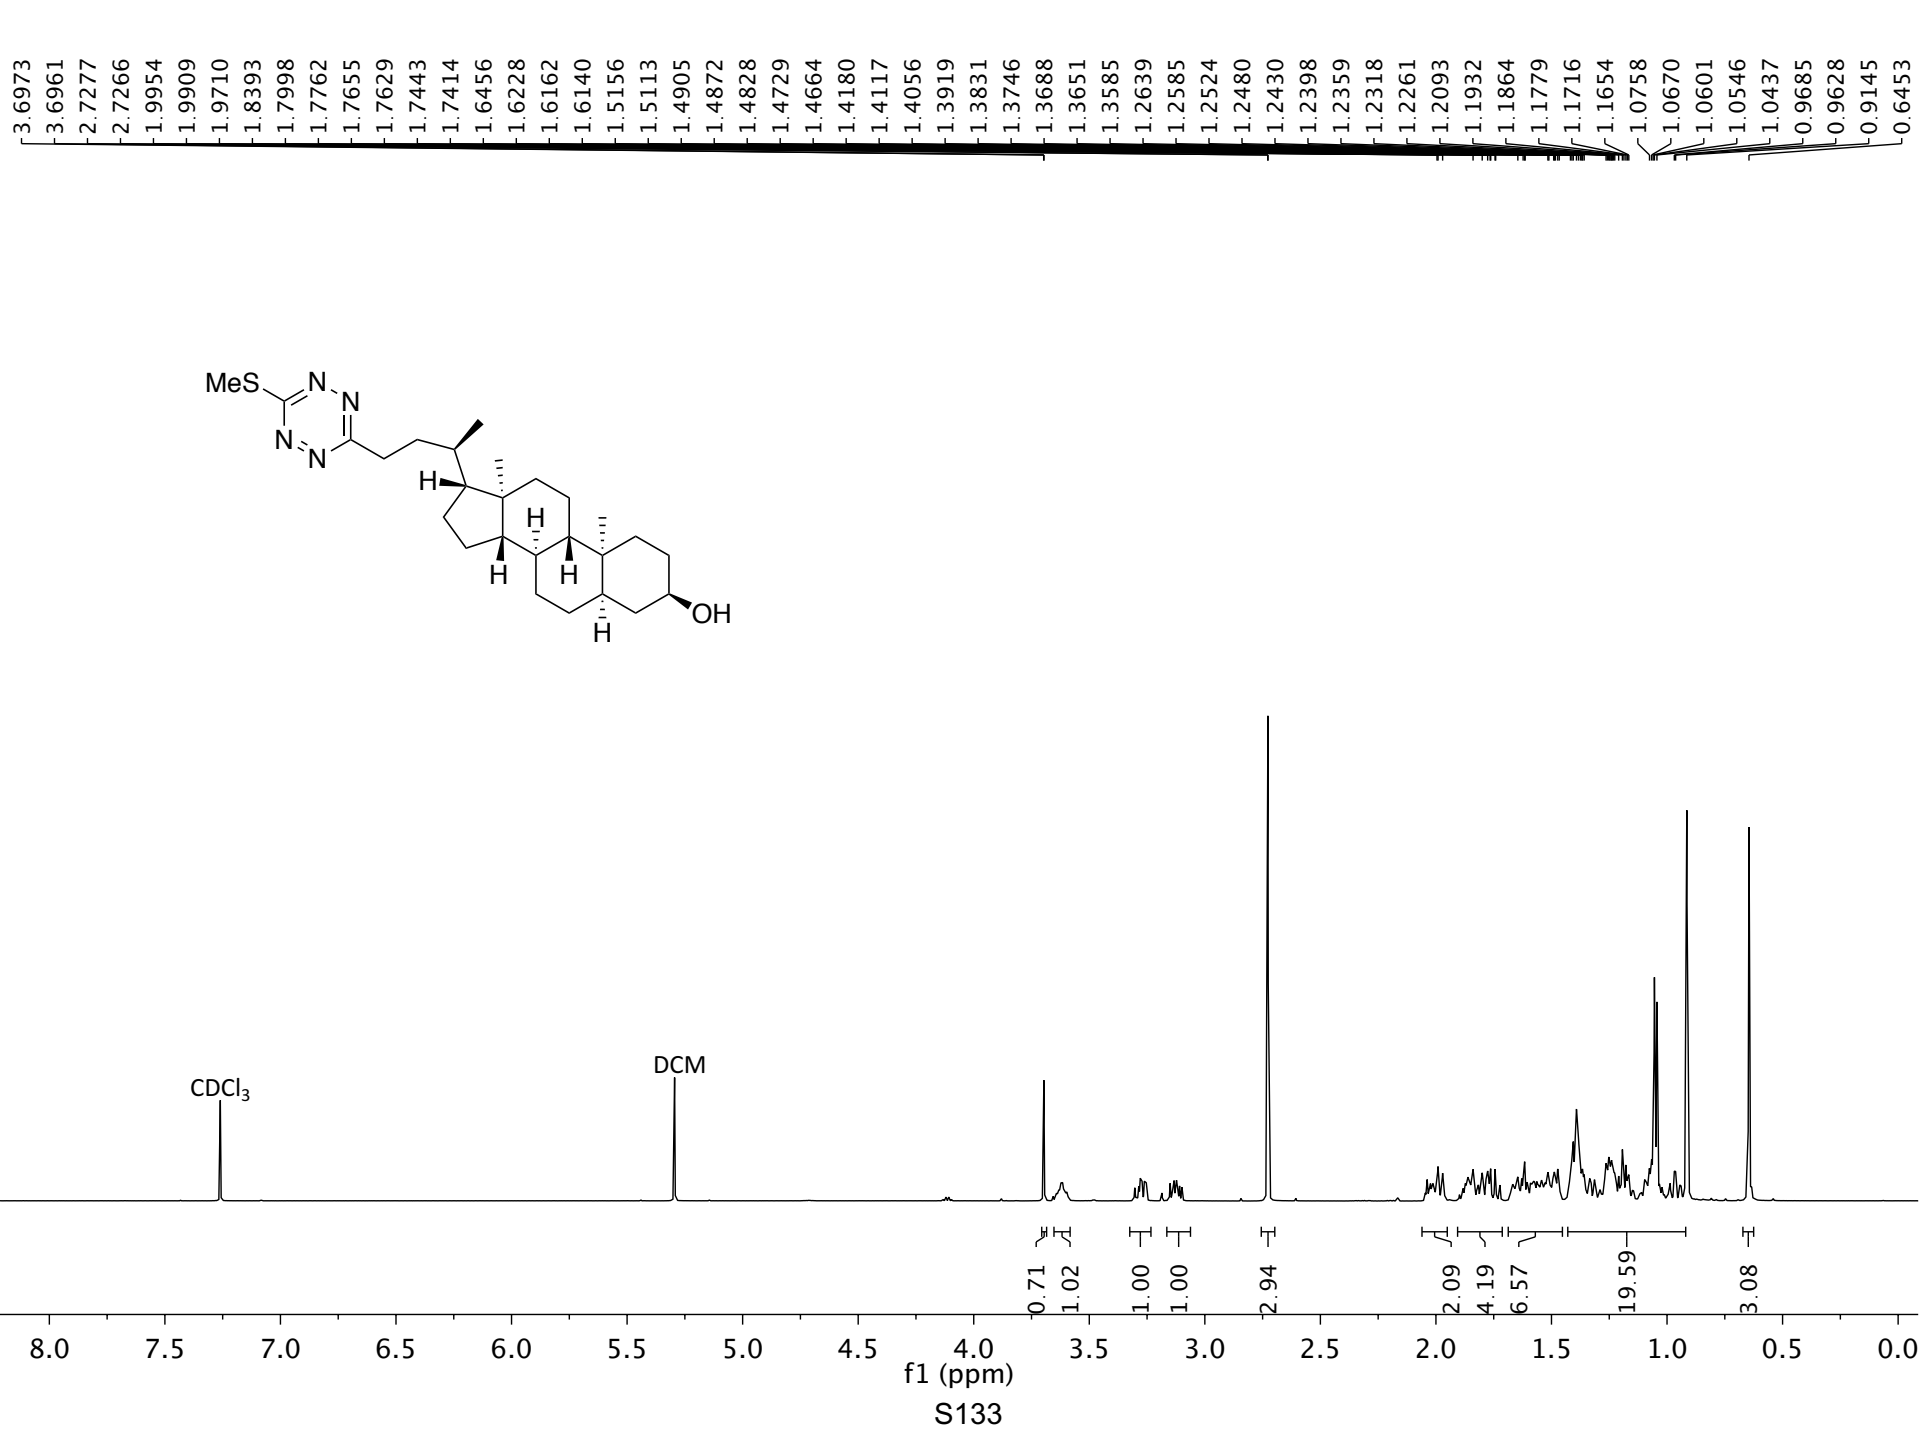

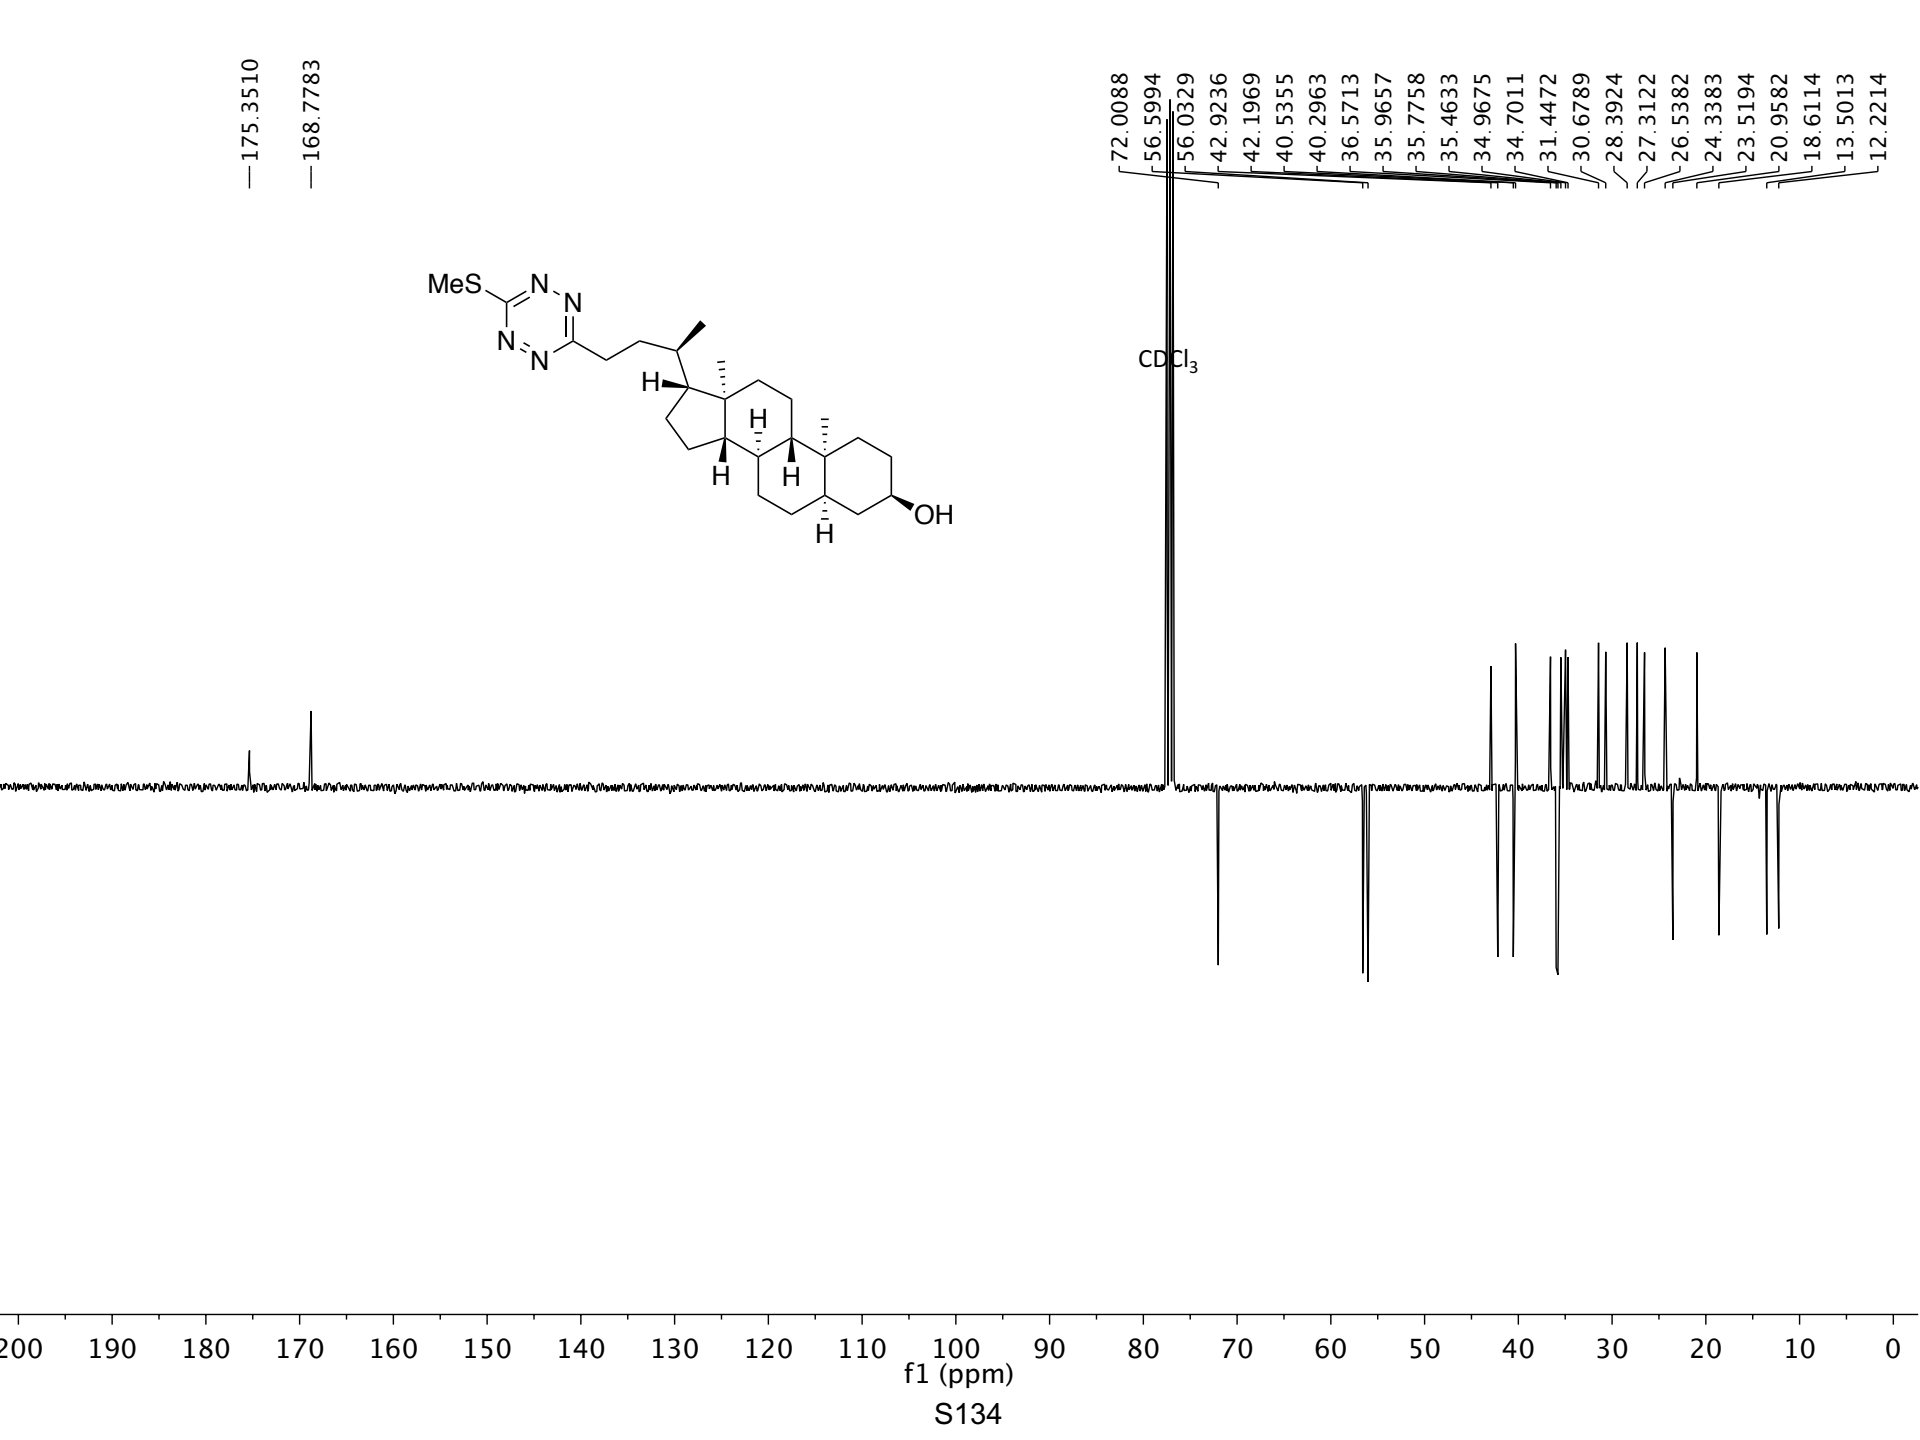

8.2691  
8.2648  
8.2612  
7.8457  
7.8395  
7.8239  
7.8176

7.0154  
6.9937

2.7043  
2.0333  
1.9932  
1.9785  
1.9713  
1.9575  
1.9153  
1.7702  
1.7279  
1.7141  
1.7070  
1.6922  
1.6520

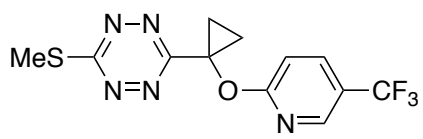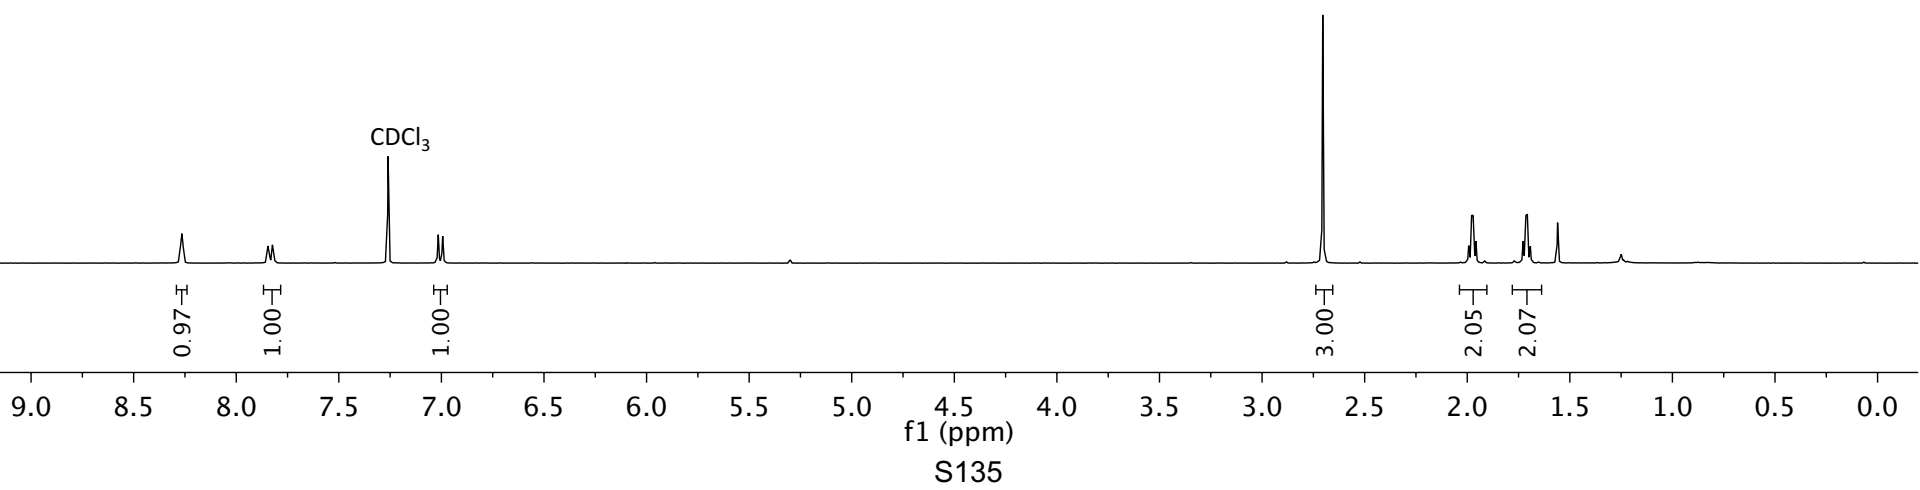

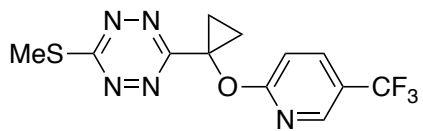

- 175.2227
- 167.1286
- 164.9321
- 144.8964
- 144.8541
- 144.8107
- 144.7679
- 136.3834
- 136.3144
- 136.2991
- 136.2440
- 127.9388
- 125.2409
- 122.5440
- 121.7619
- 121.4318
- 121.1012
- 120.7710
- 119.8464
- 111.6897

CDCl<sub>3</sub>

- 59.0420
- 53.5790

29.8396

- 19.4526
- 13.4884

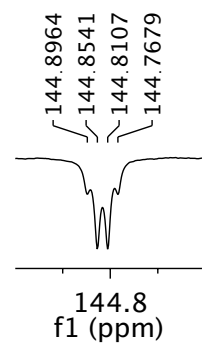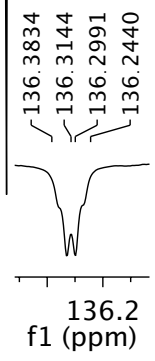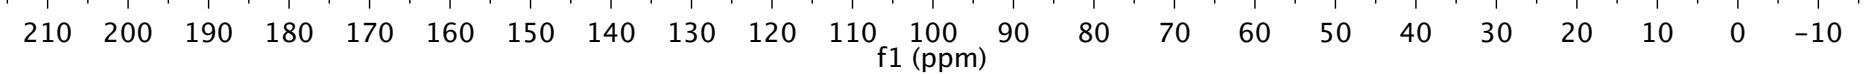



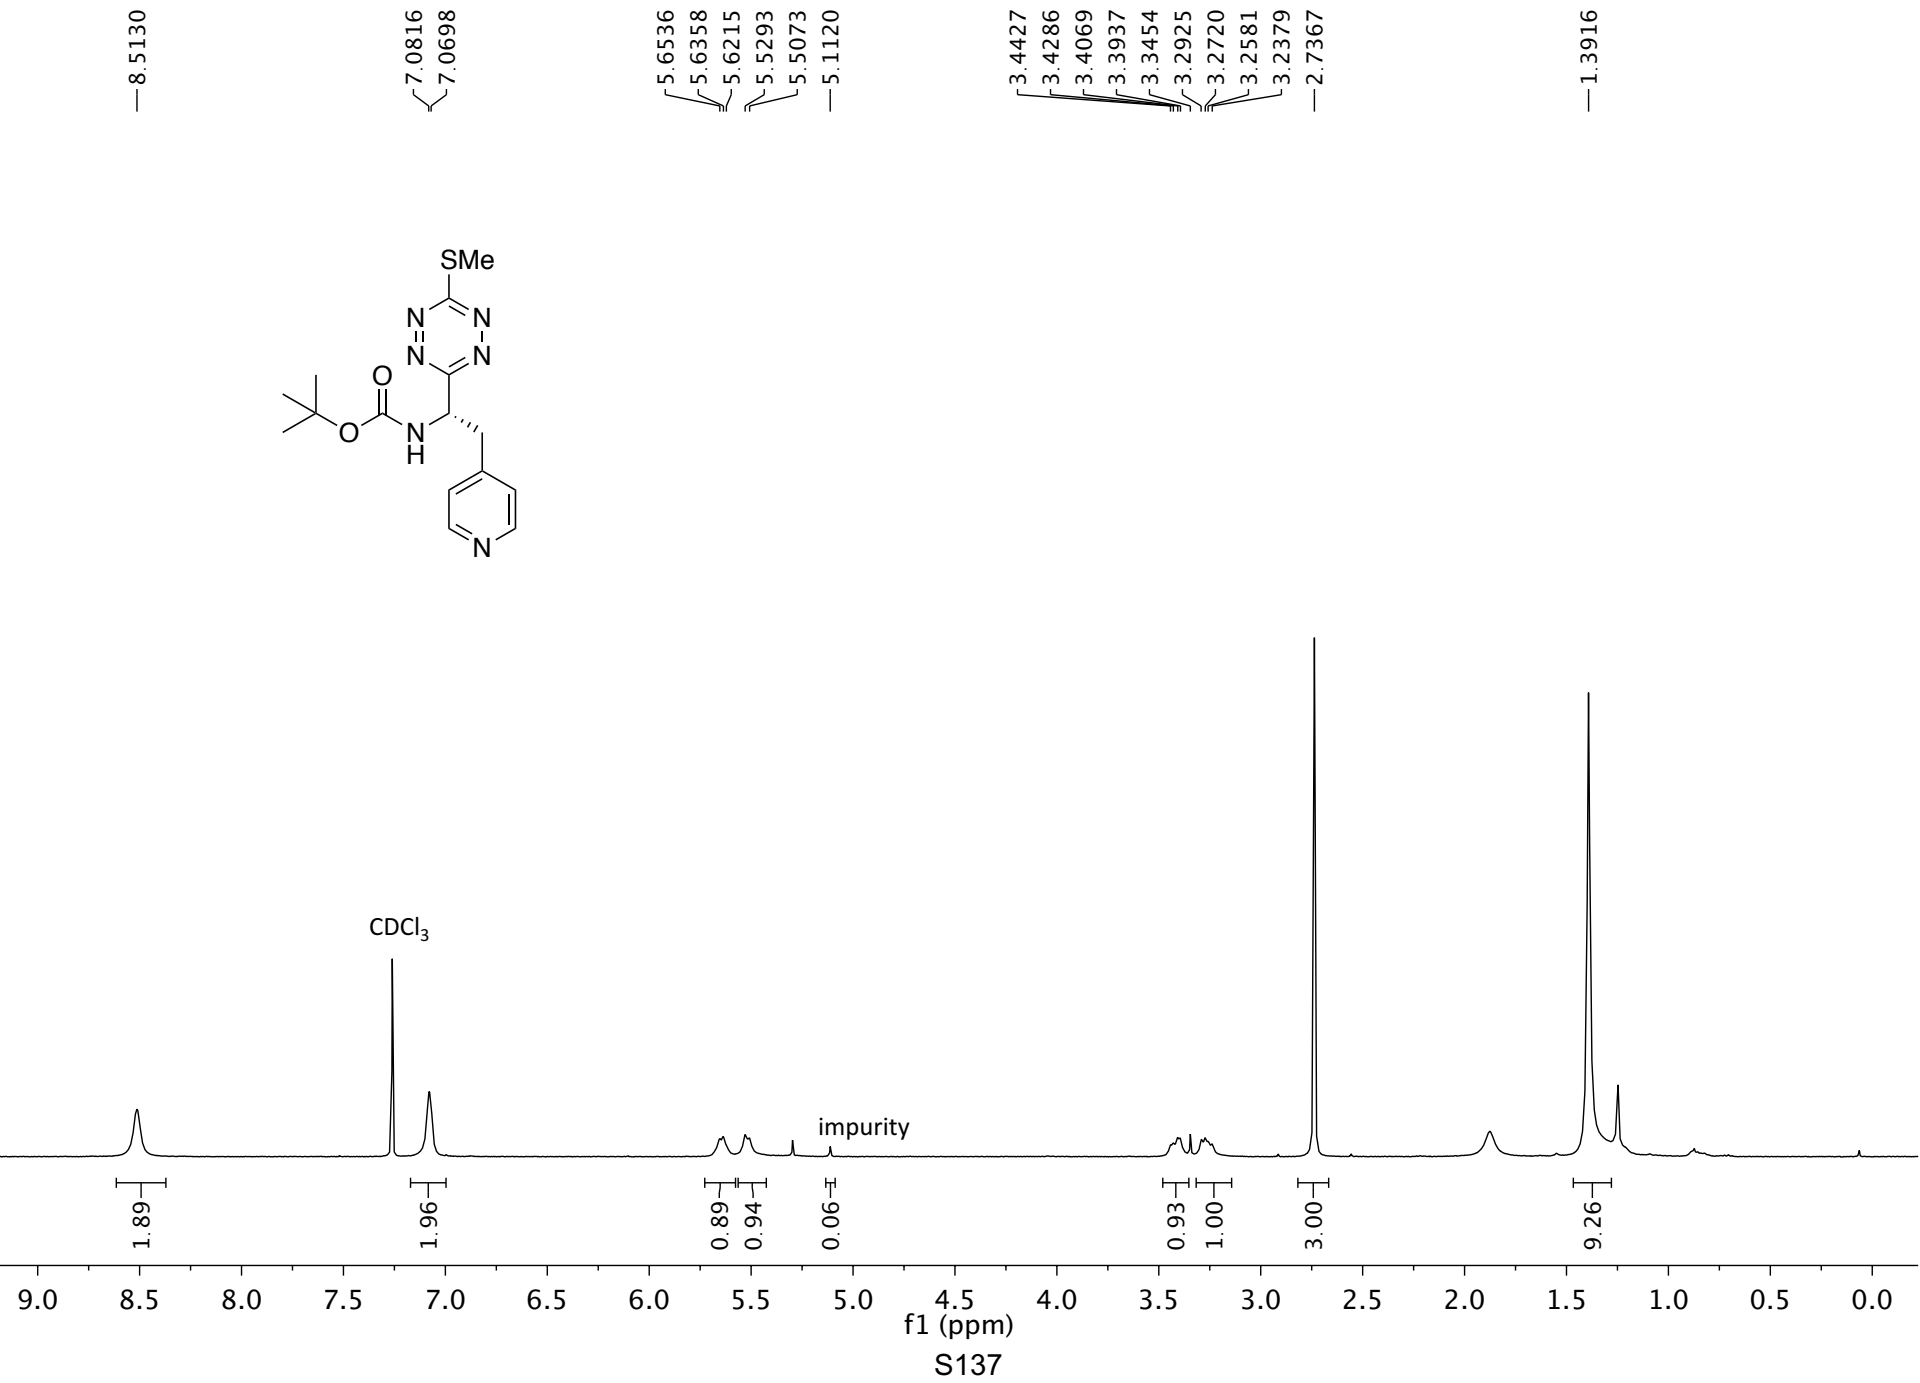

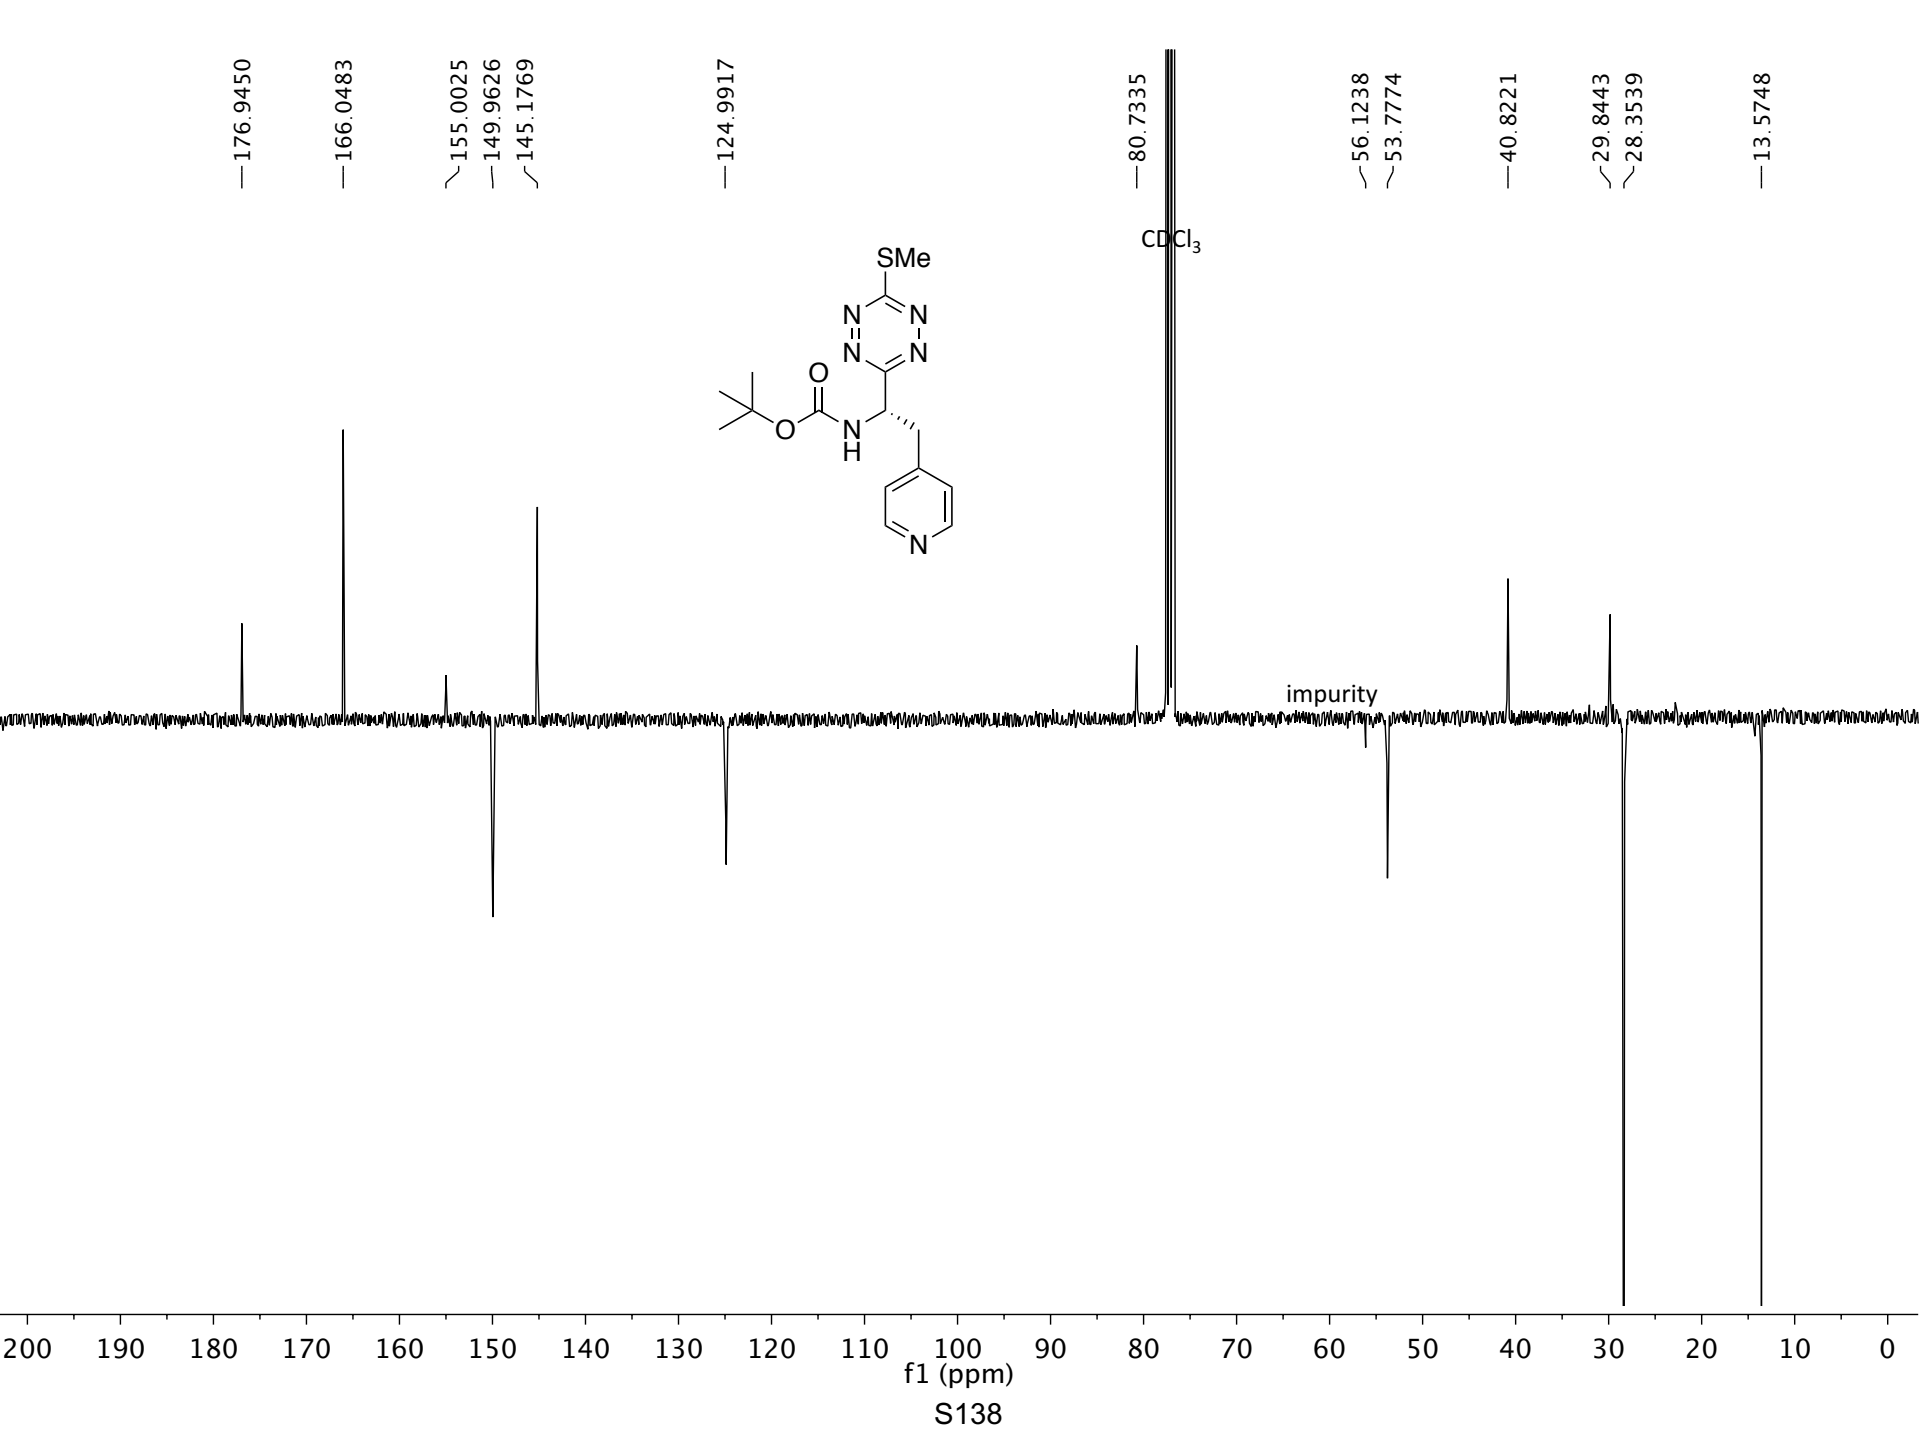

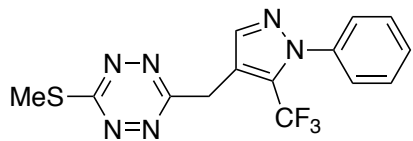

7.7156  
7.5194  
7.4985  
7.4942  
7.4887  
7.4851  
7.4771  
7.4730  
7.4683  
7.4582  
7.4501  
7.4405  
7.4325

4.6579  
4.6545

2.7506

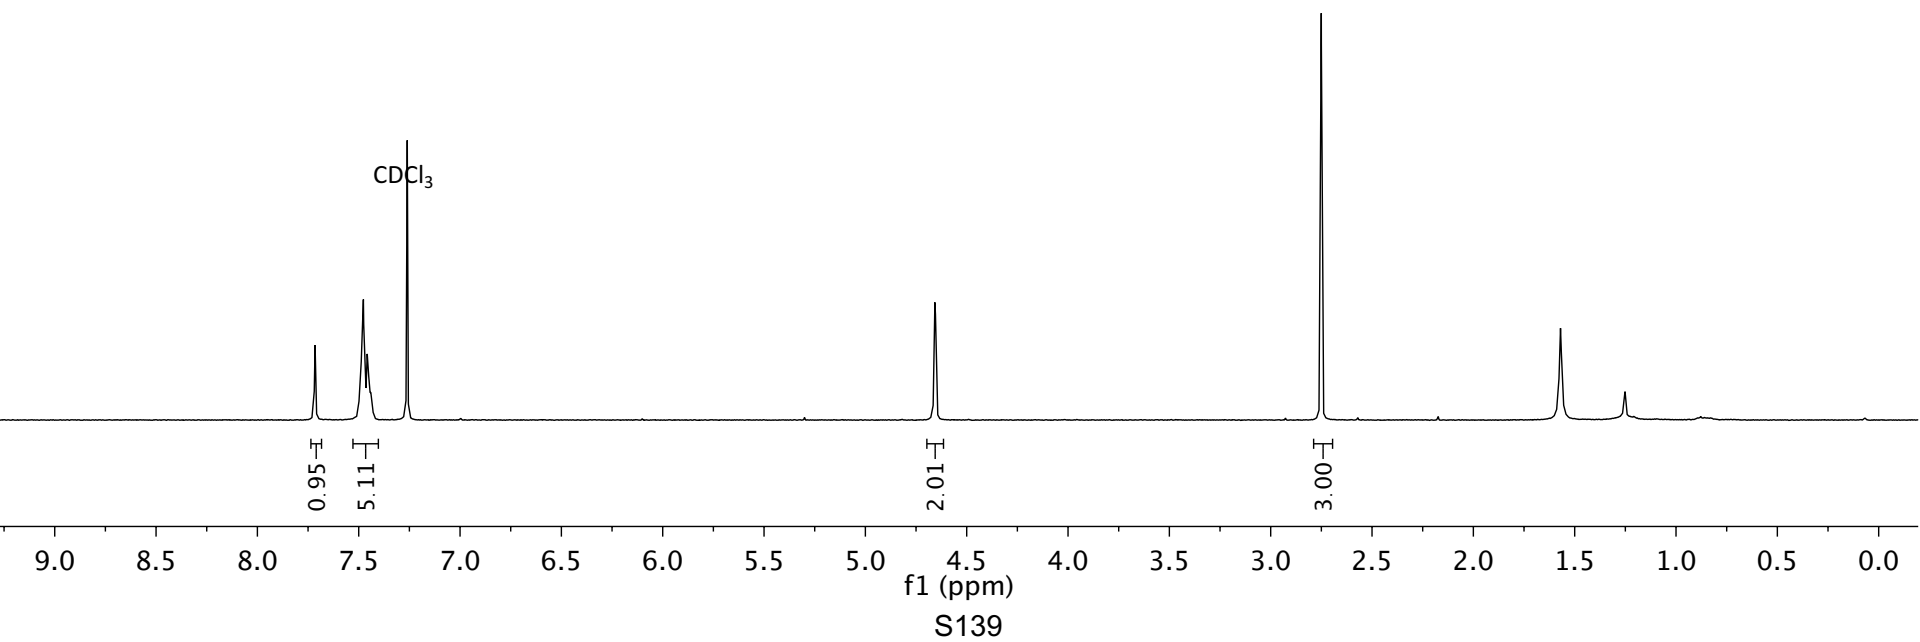

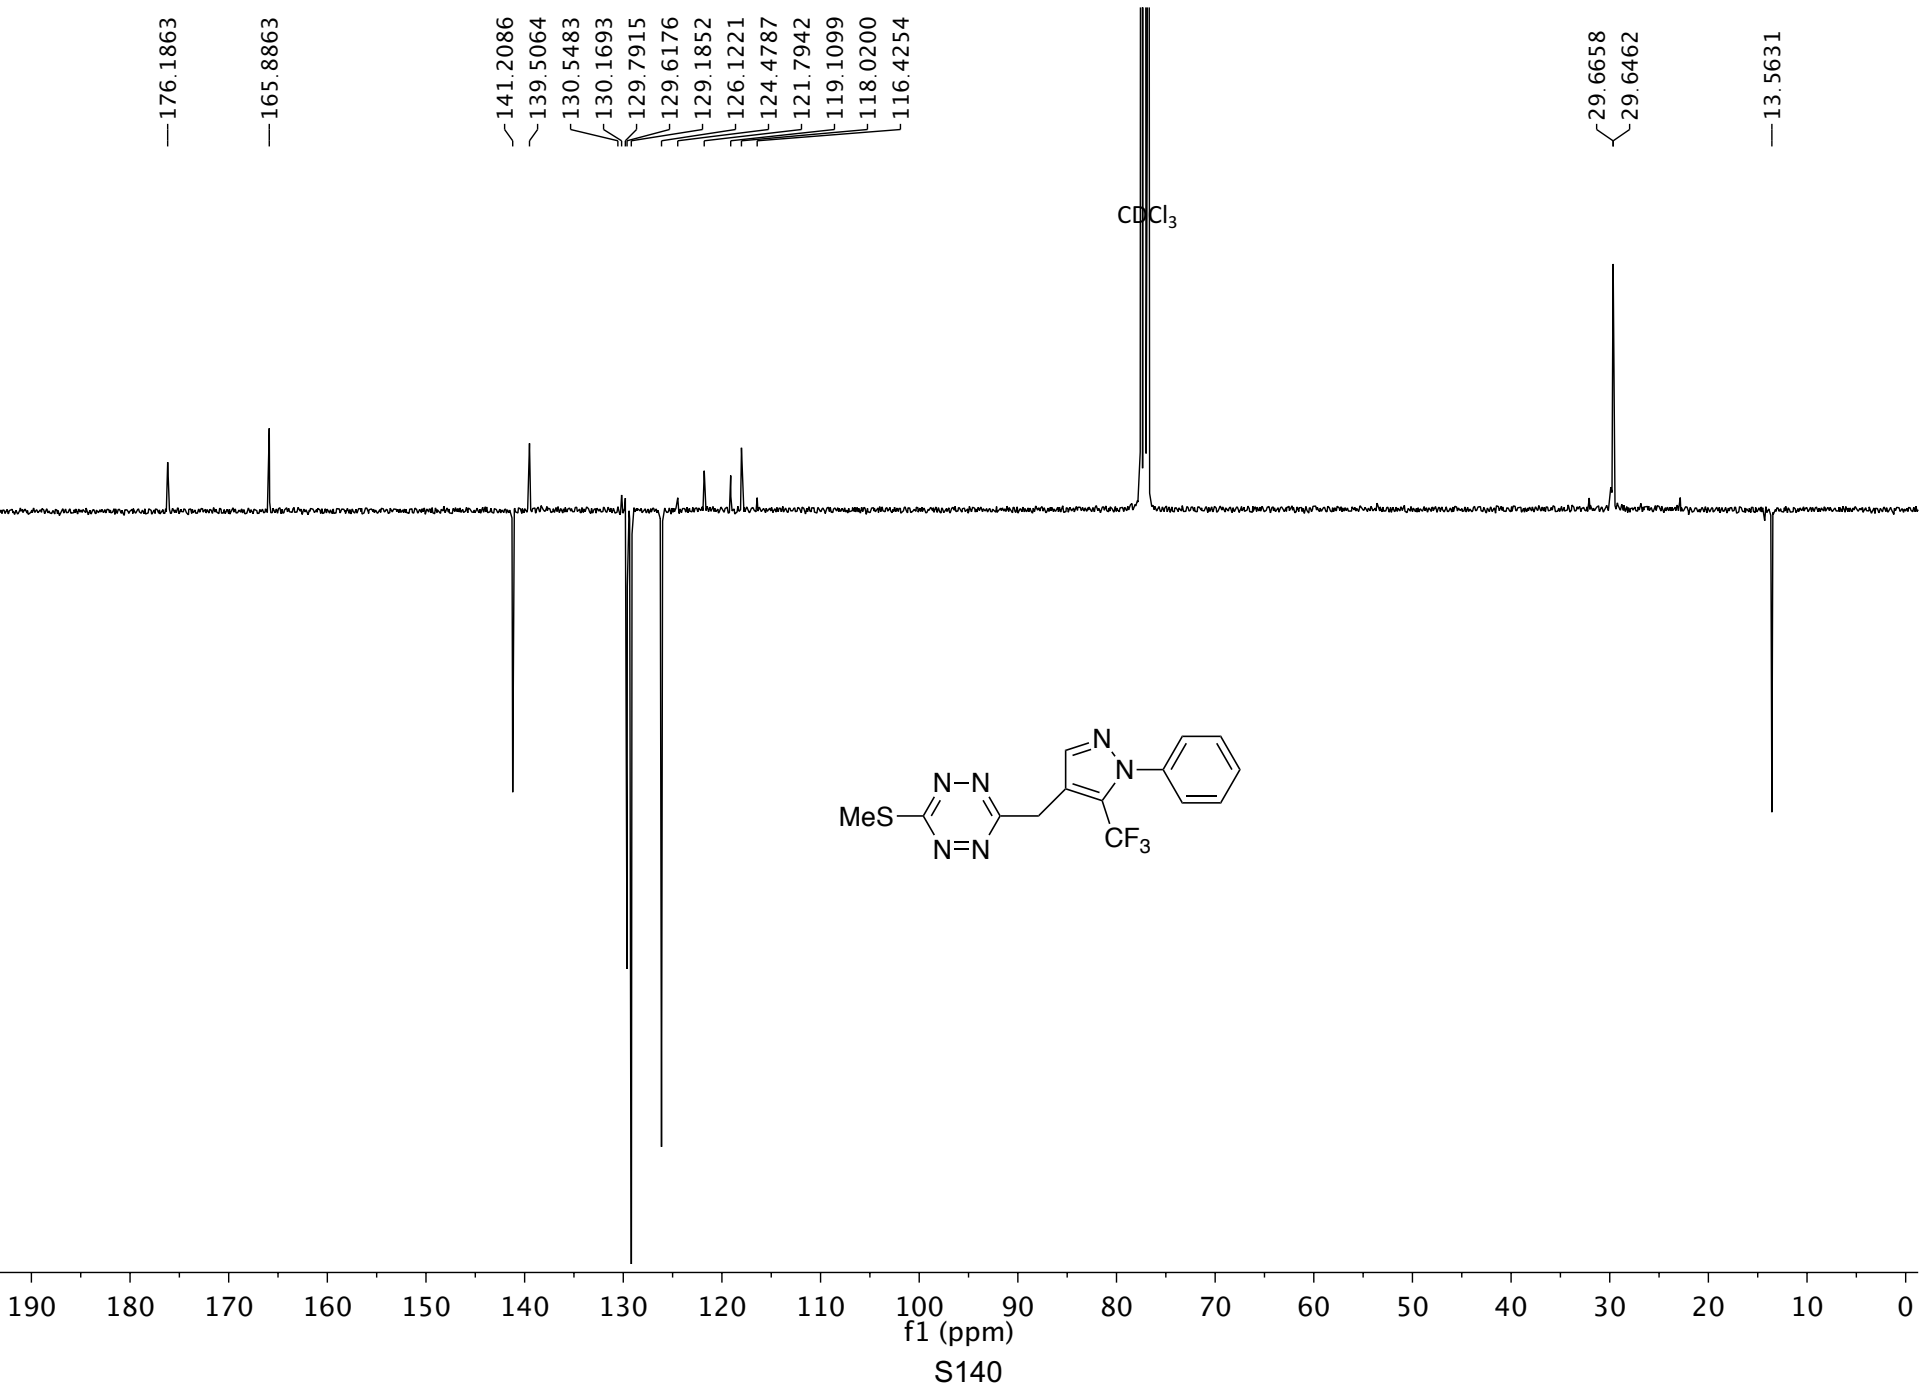

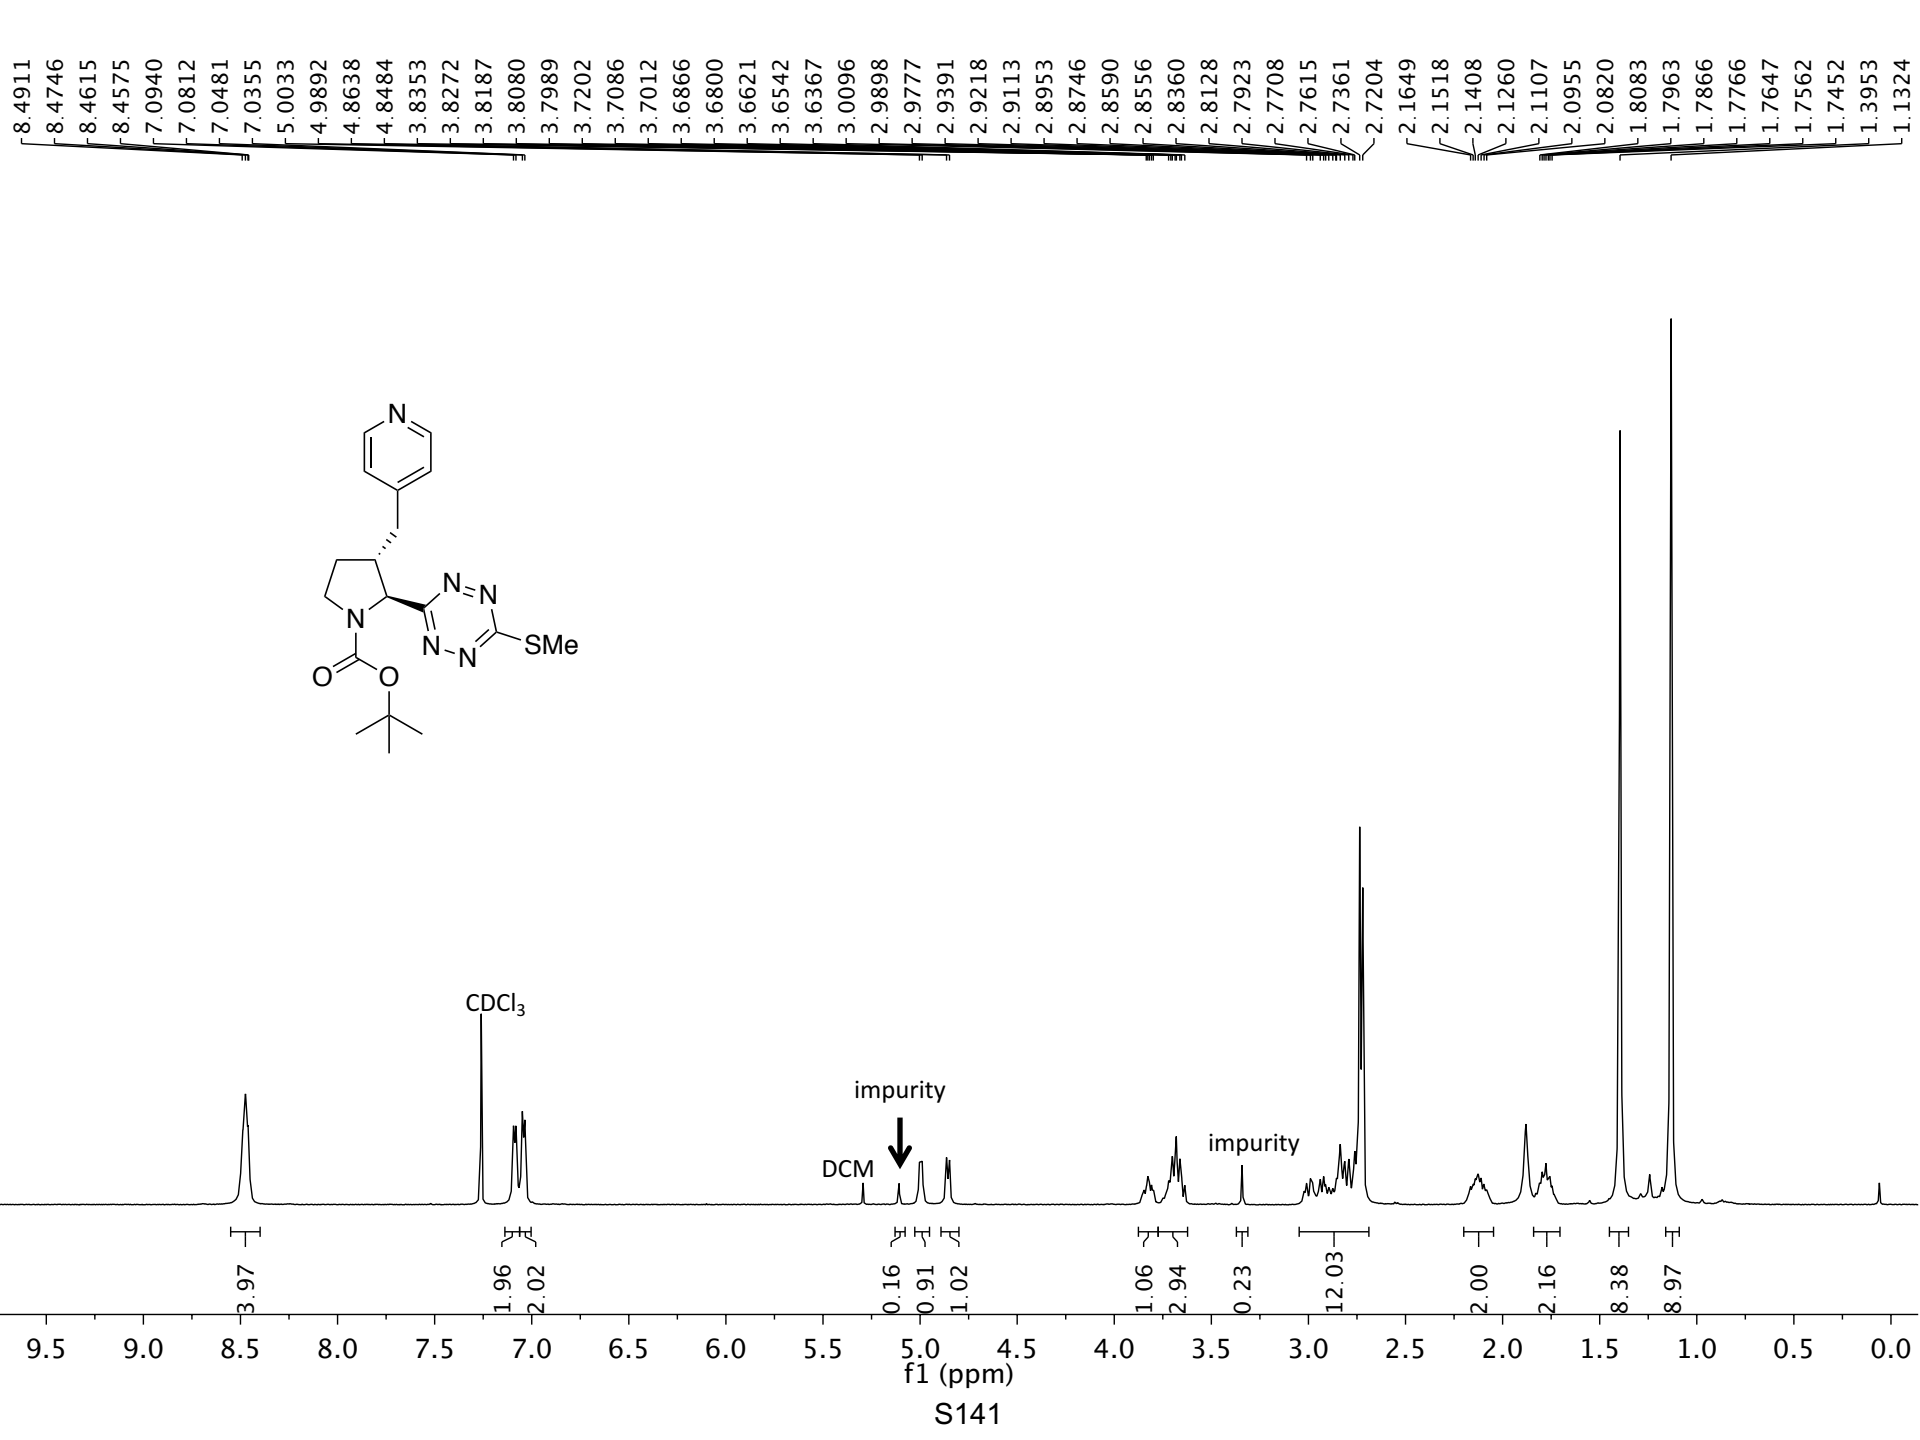

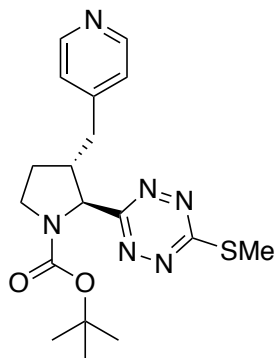

176.2455  
176.1497  
168.4748  
168.0843  
154.4035  
153.3462  
150.0936  
147.7755  
147.6726

124.4058  
124.2860

80.4812  
CDCl<sub>3</sub>  
65.1198  
64.8849  
56.1138  
48.3250  
47.2047  
46.3760  
46.2637  
37.7942  
29.7669  
29.7106  
28.4797  
28.2464  
13.5287

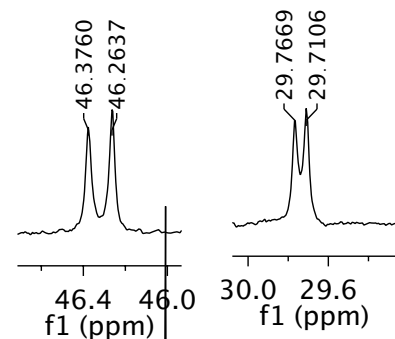

210 200 190 180 170 160 150 140 130 120 110 100 90 80 70 60 50 40 30 20 10 0 -10  
f1 (ppm)

7.0868  
6.8740  
6.8639

6.2543  
6.2444  
6.1181

3.7300  
3.7261  
3.7119  
3.7093  
3.7058  
3.7040  
3.6916  
3.6891  
3.6225  
3.6035  
3.5848

2.7256  
2.5559

2.2518

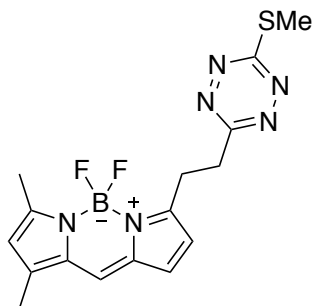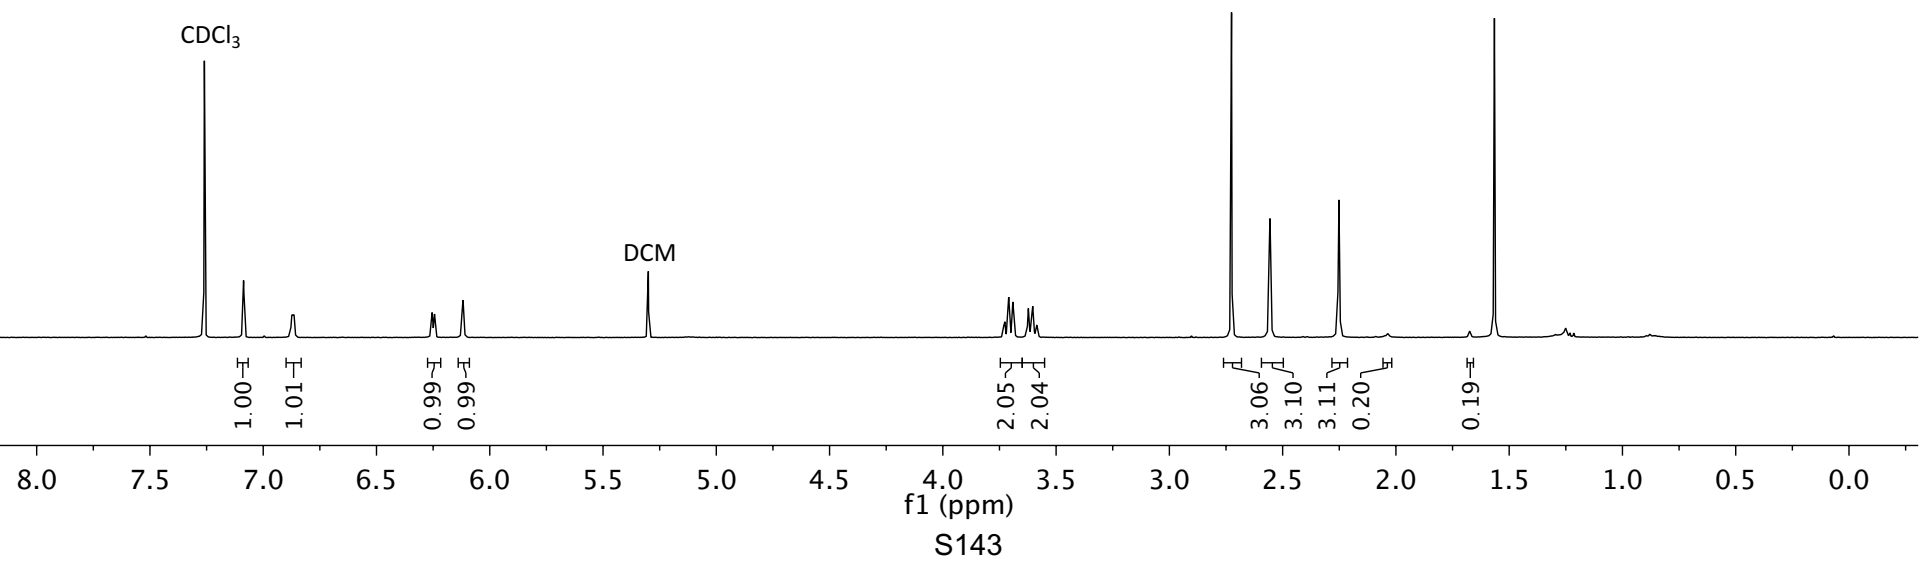

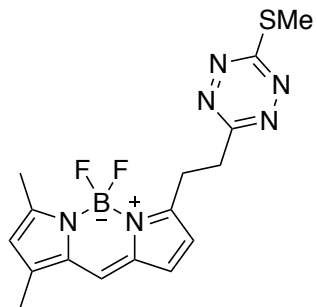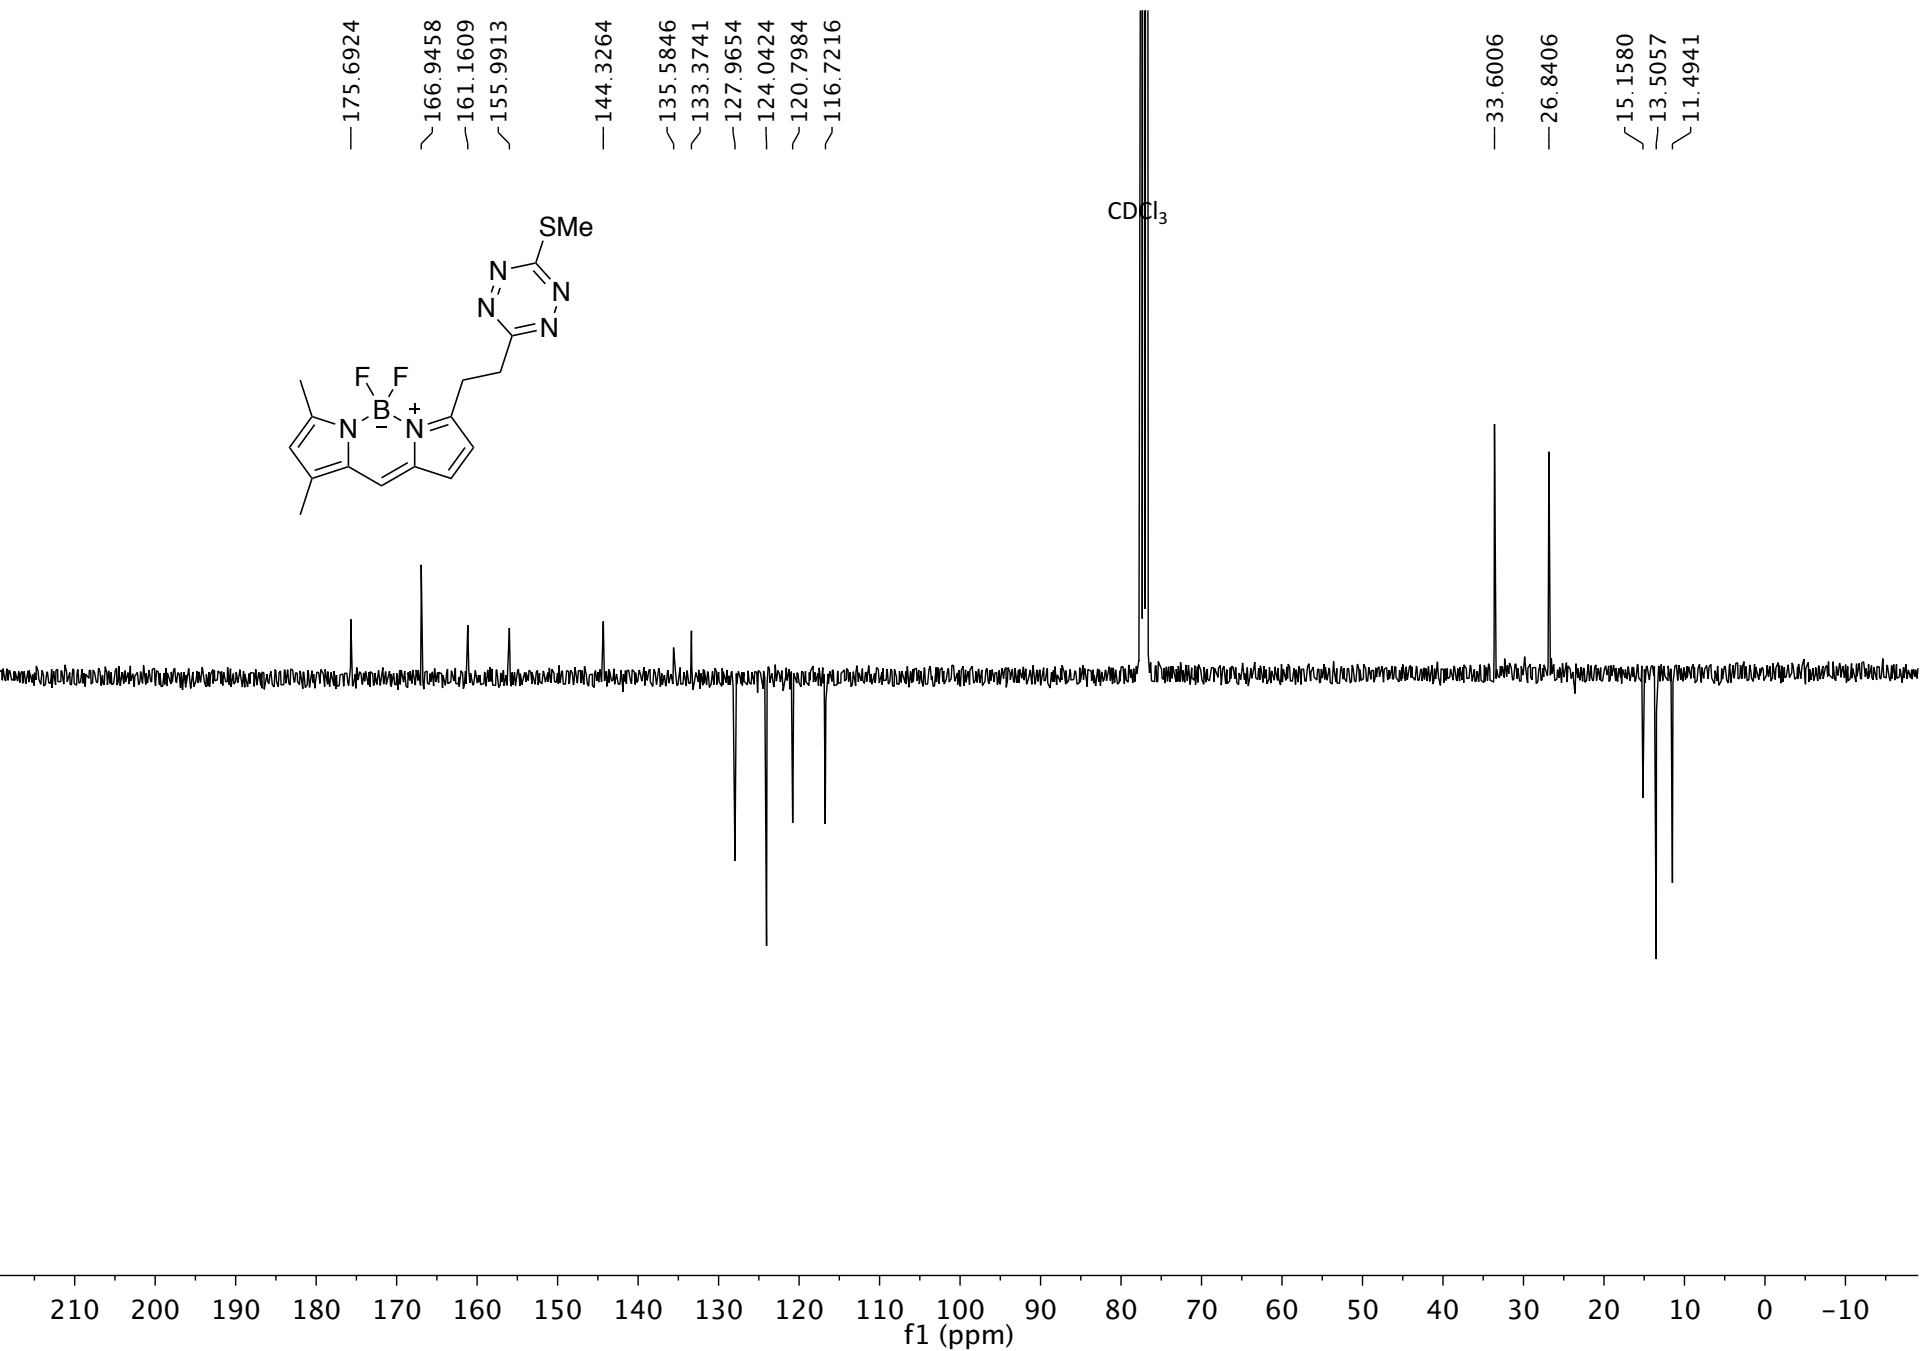



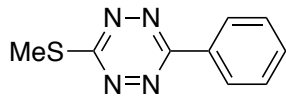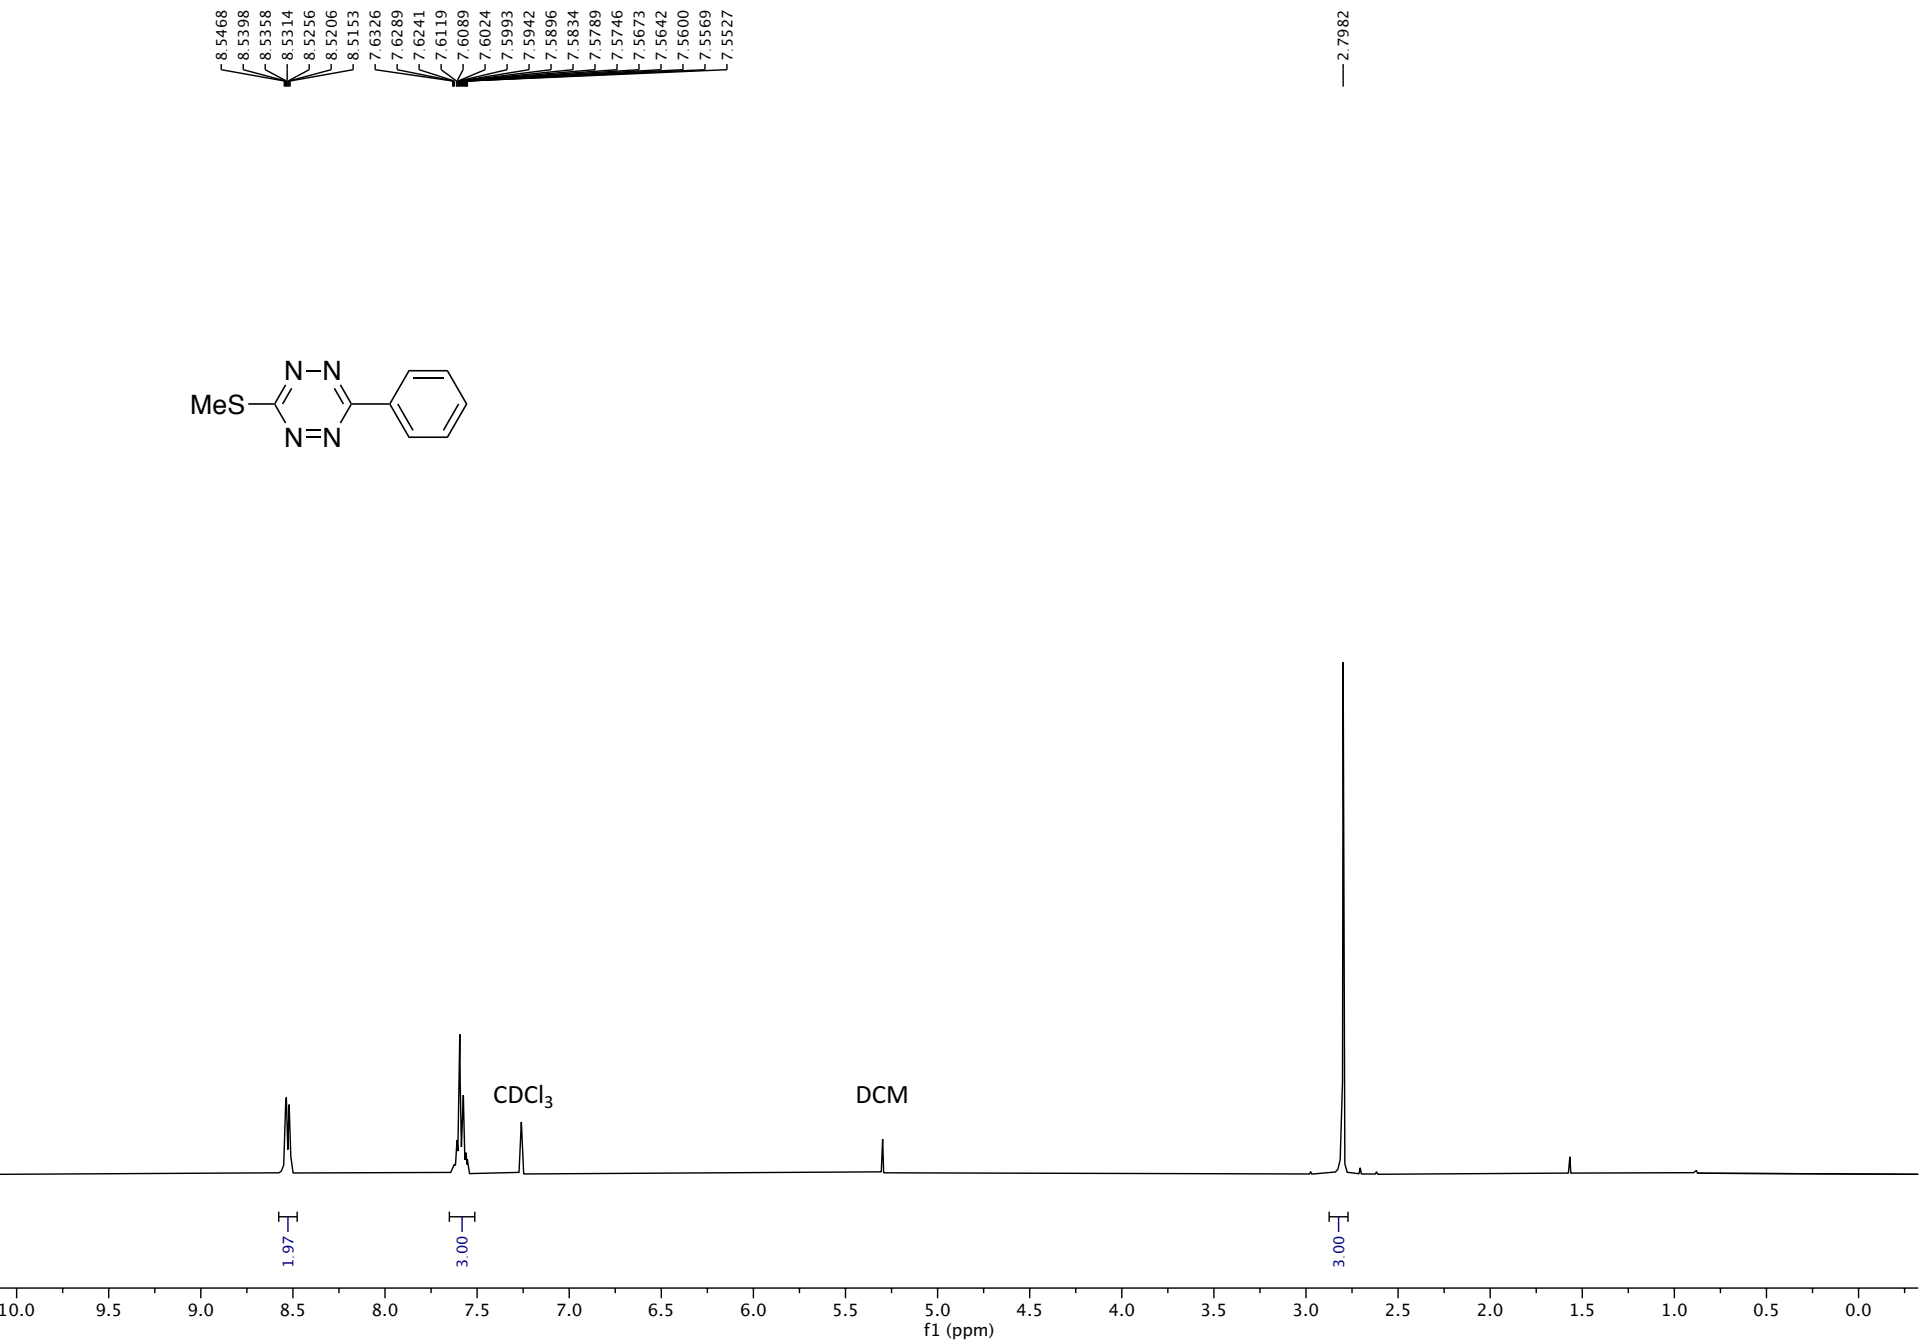

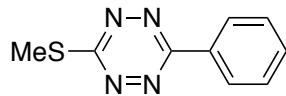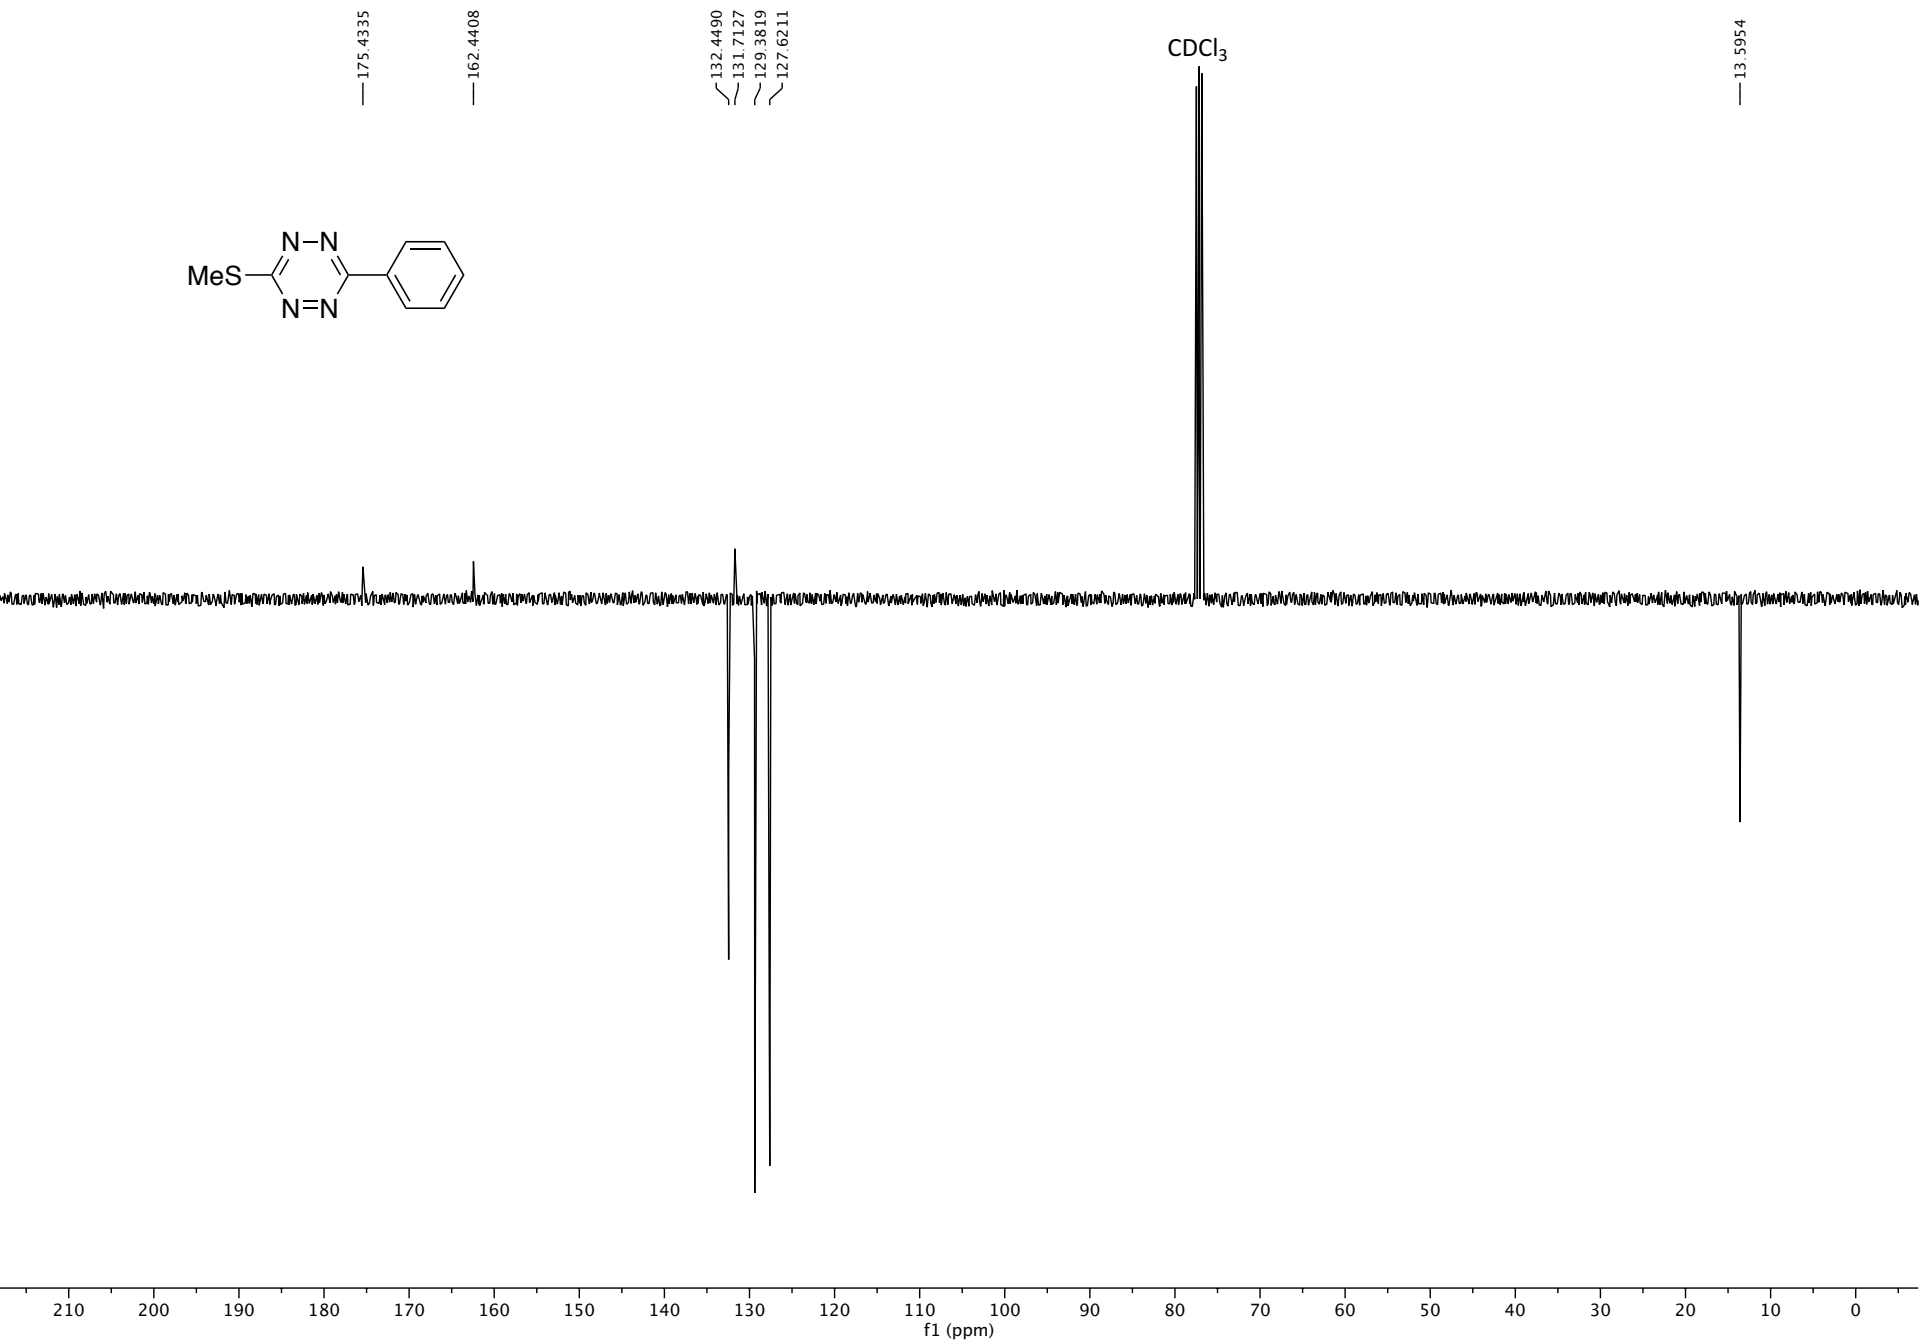

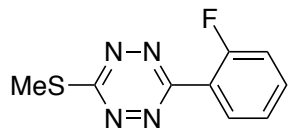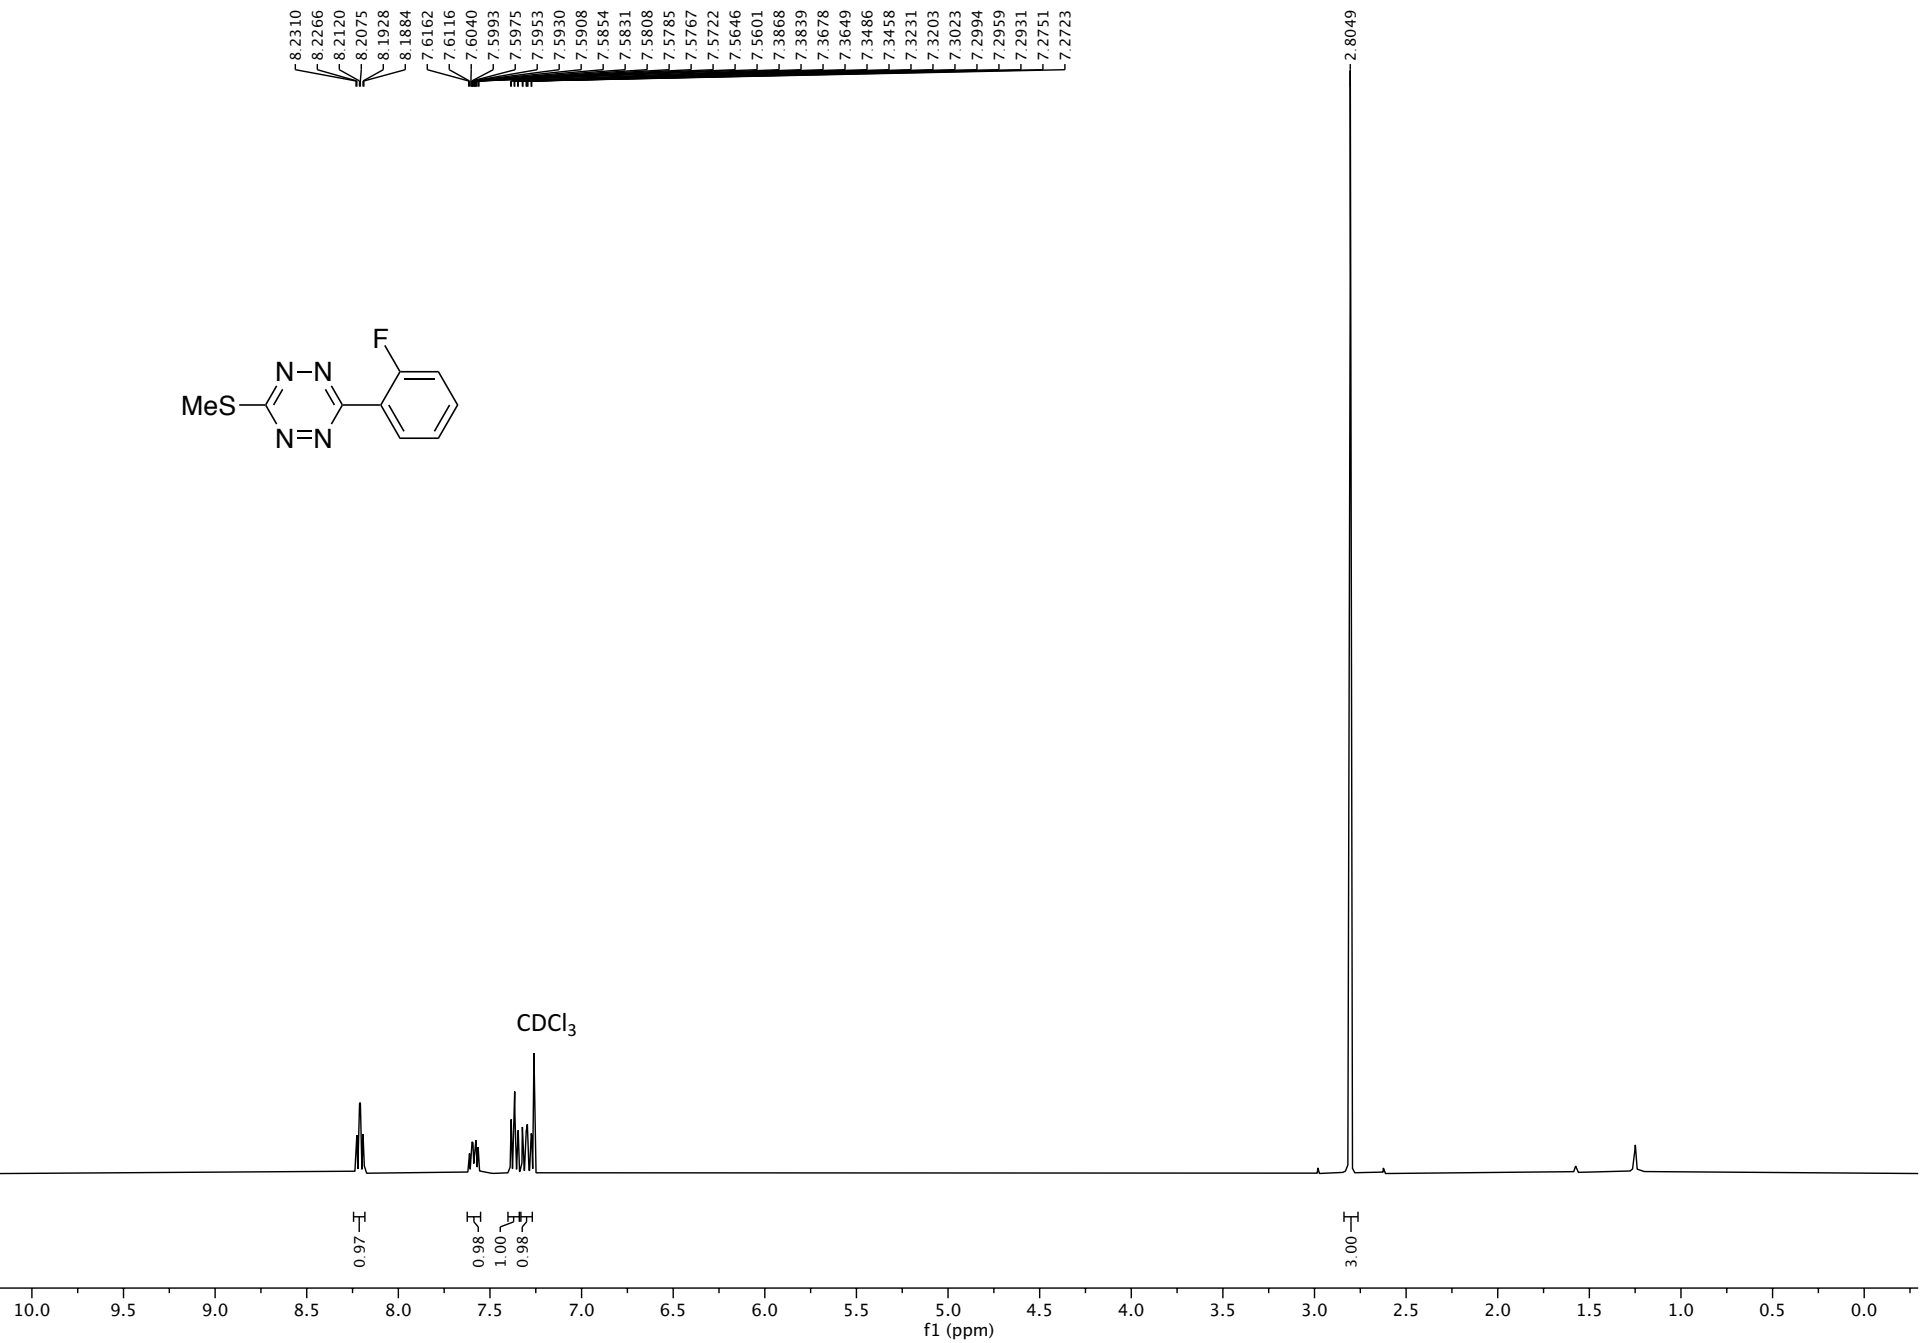

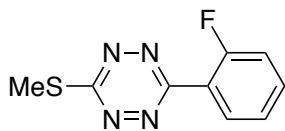

— 175.2080

162.6136  
162.0920  
162.0367  
160.0440

133.7985  
133.7133  
131.0770  
131.0629  
124.8980  
124.8594  
120.6211  
120.5224  
117.5342  
117.3192

CDCl<sub>3</sub>

— 13.5762

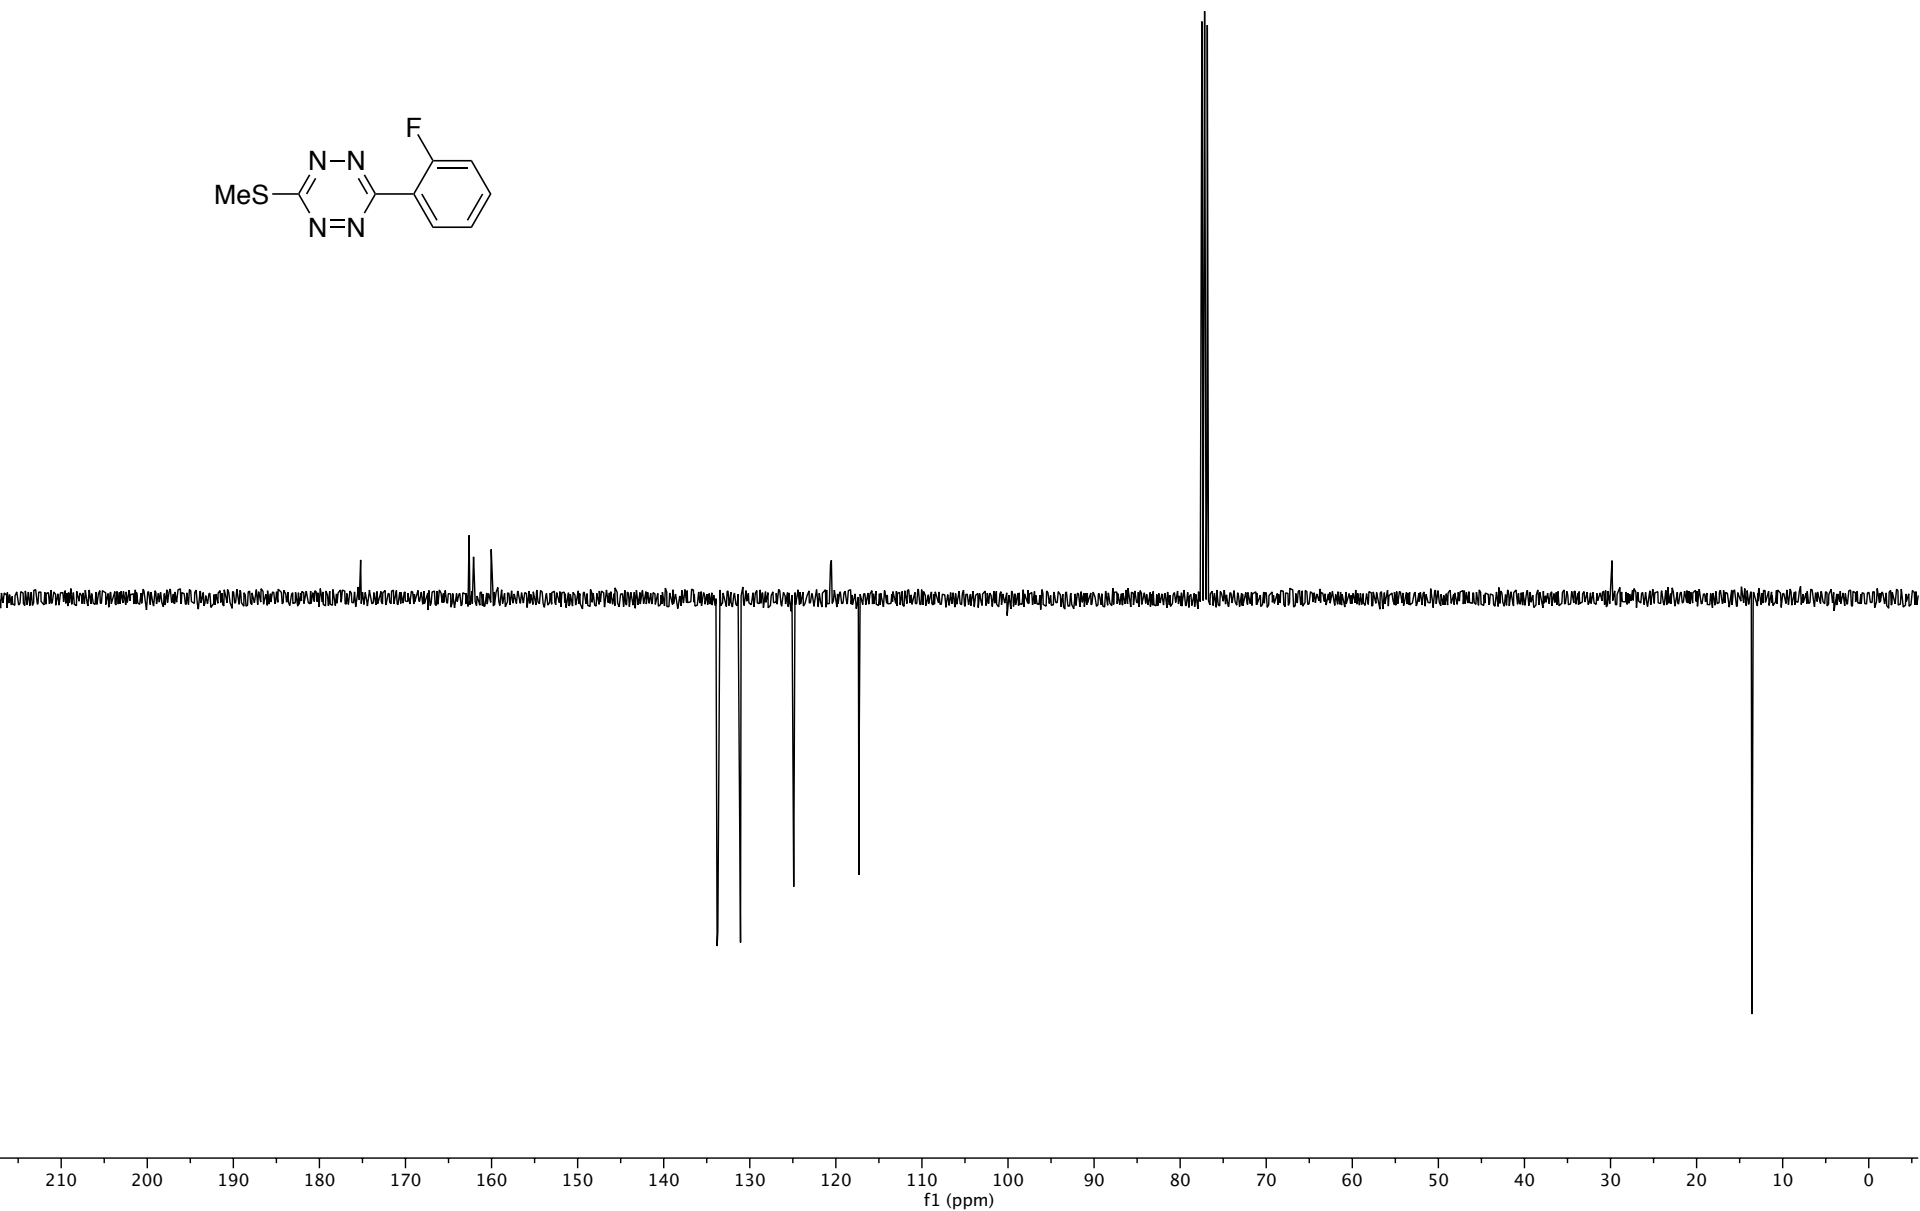

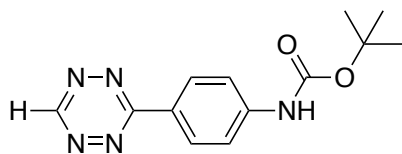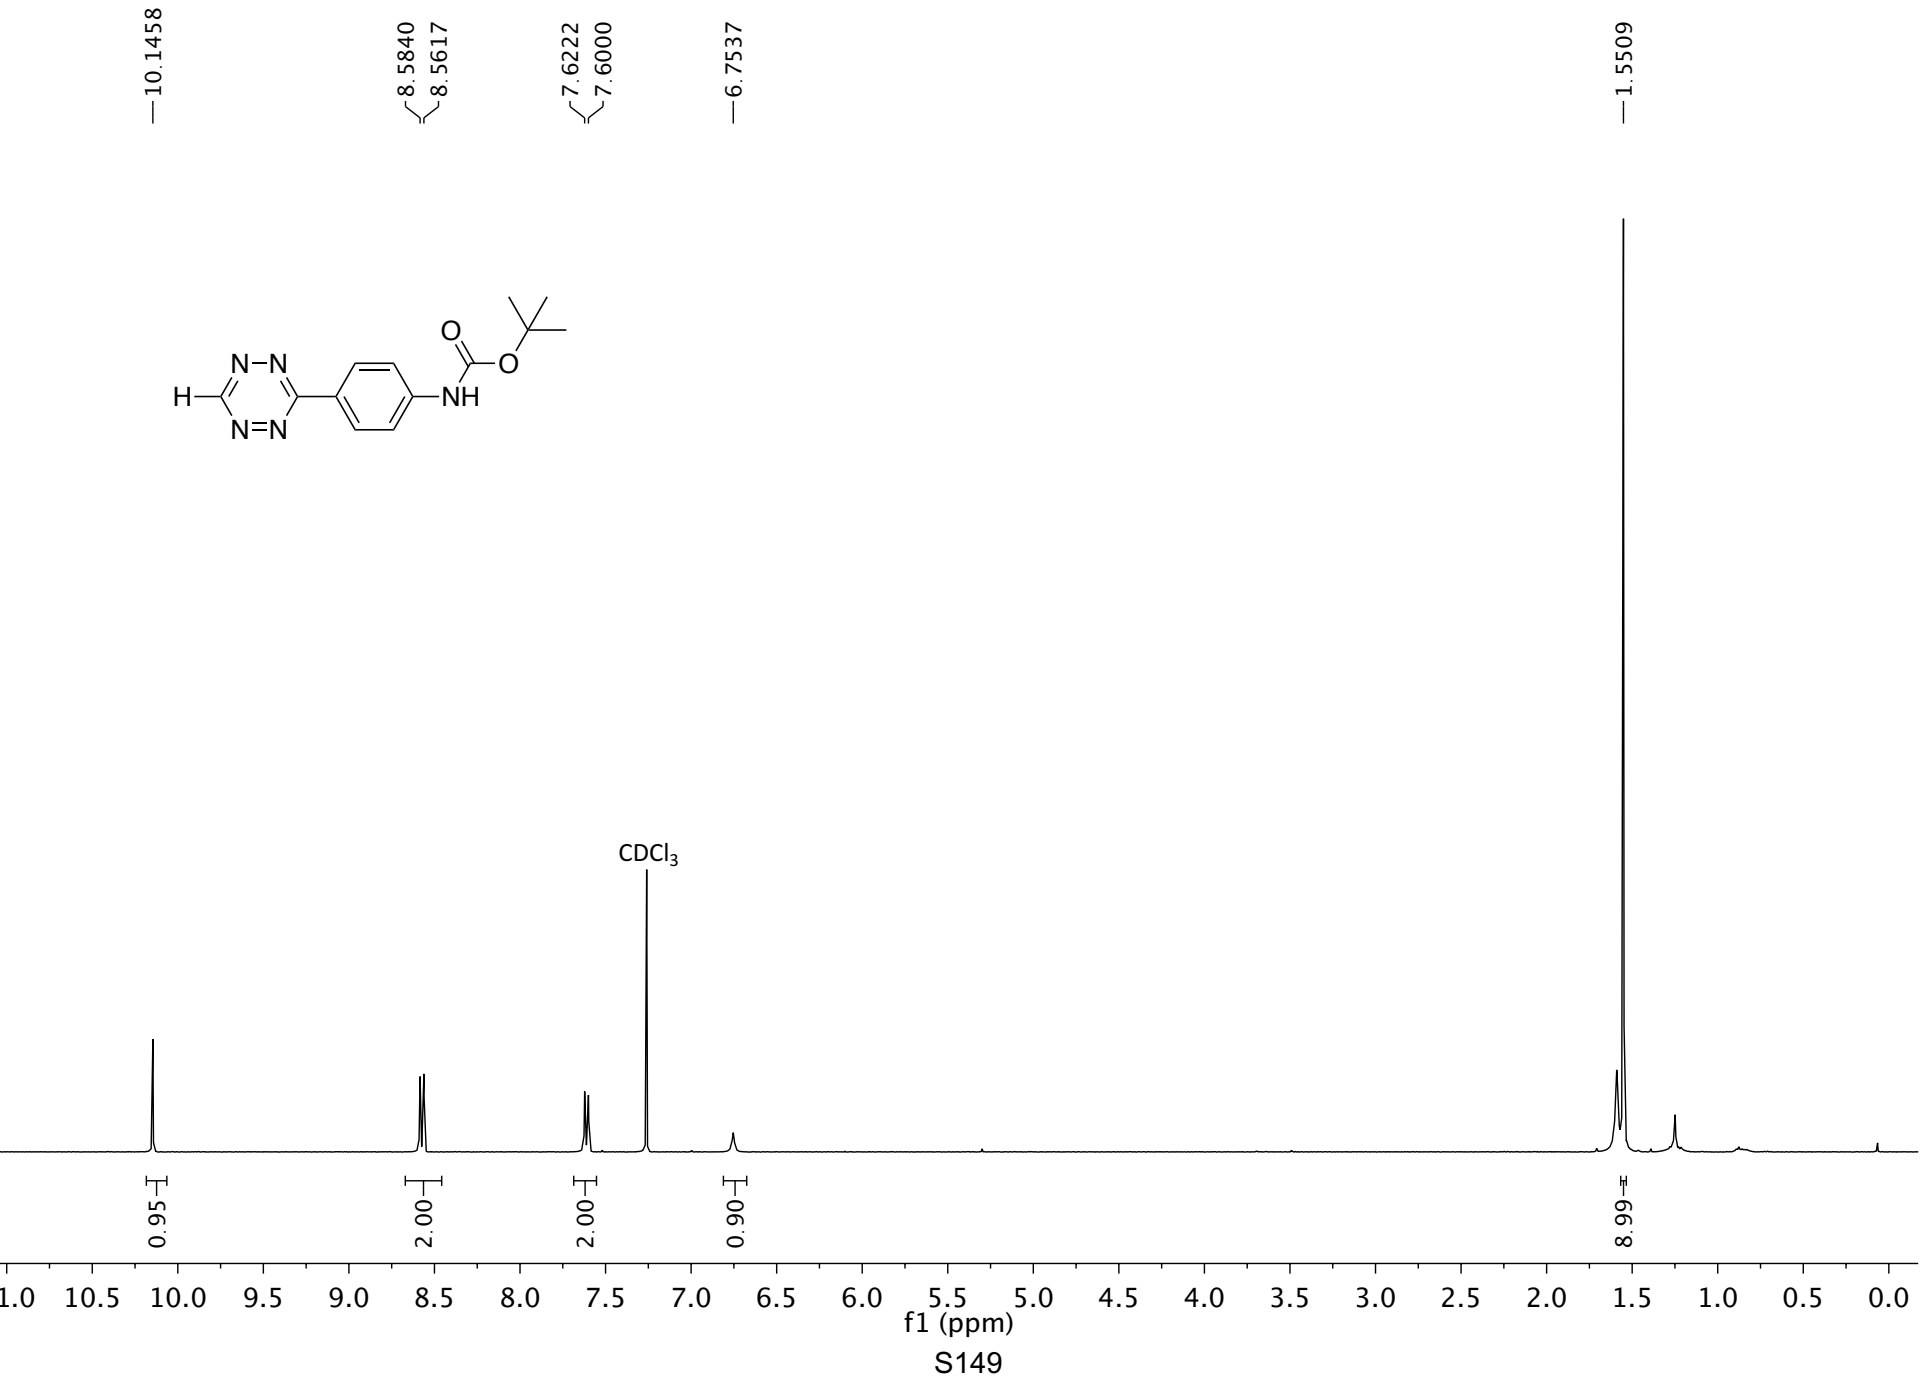

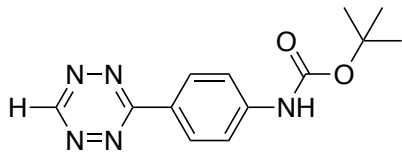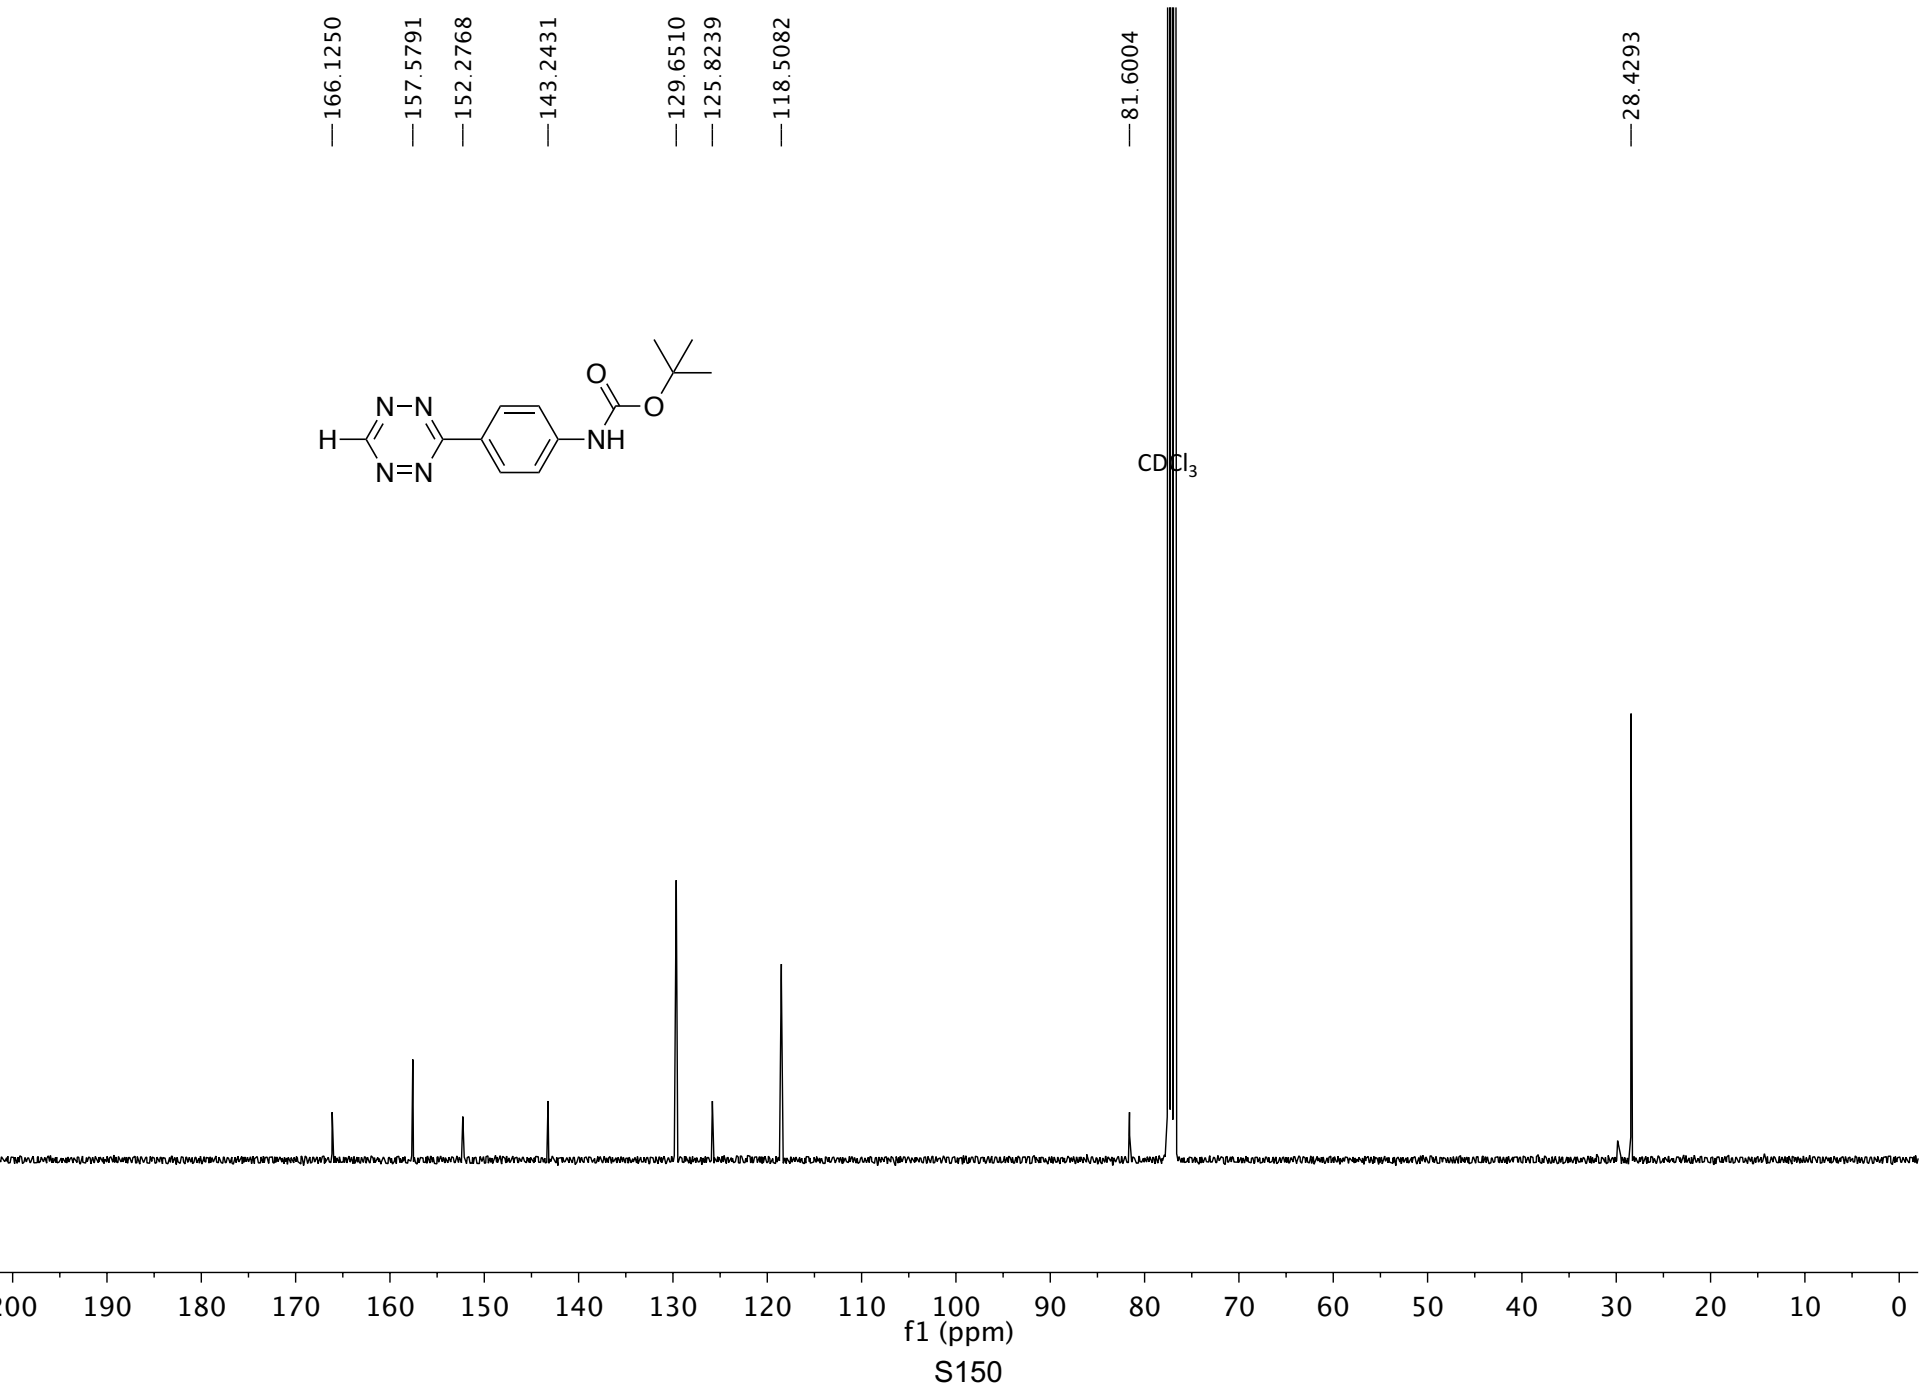

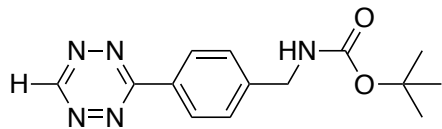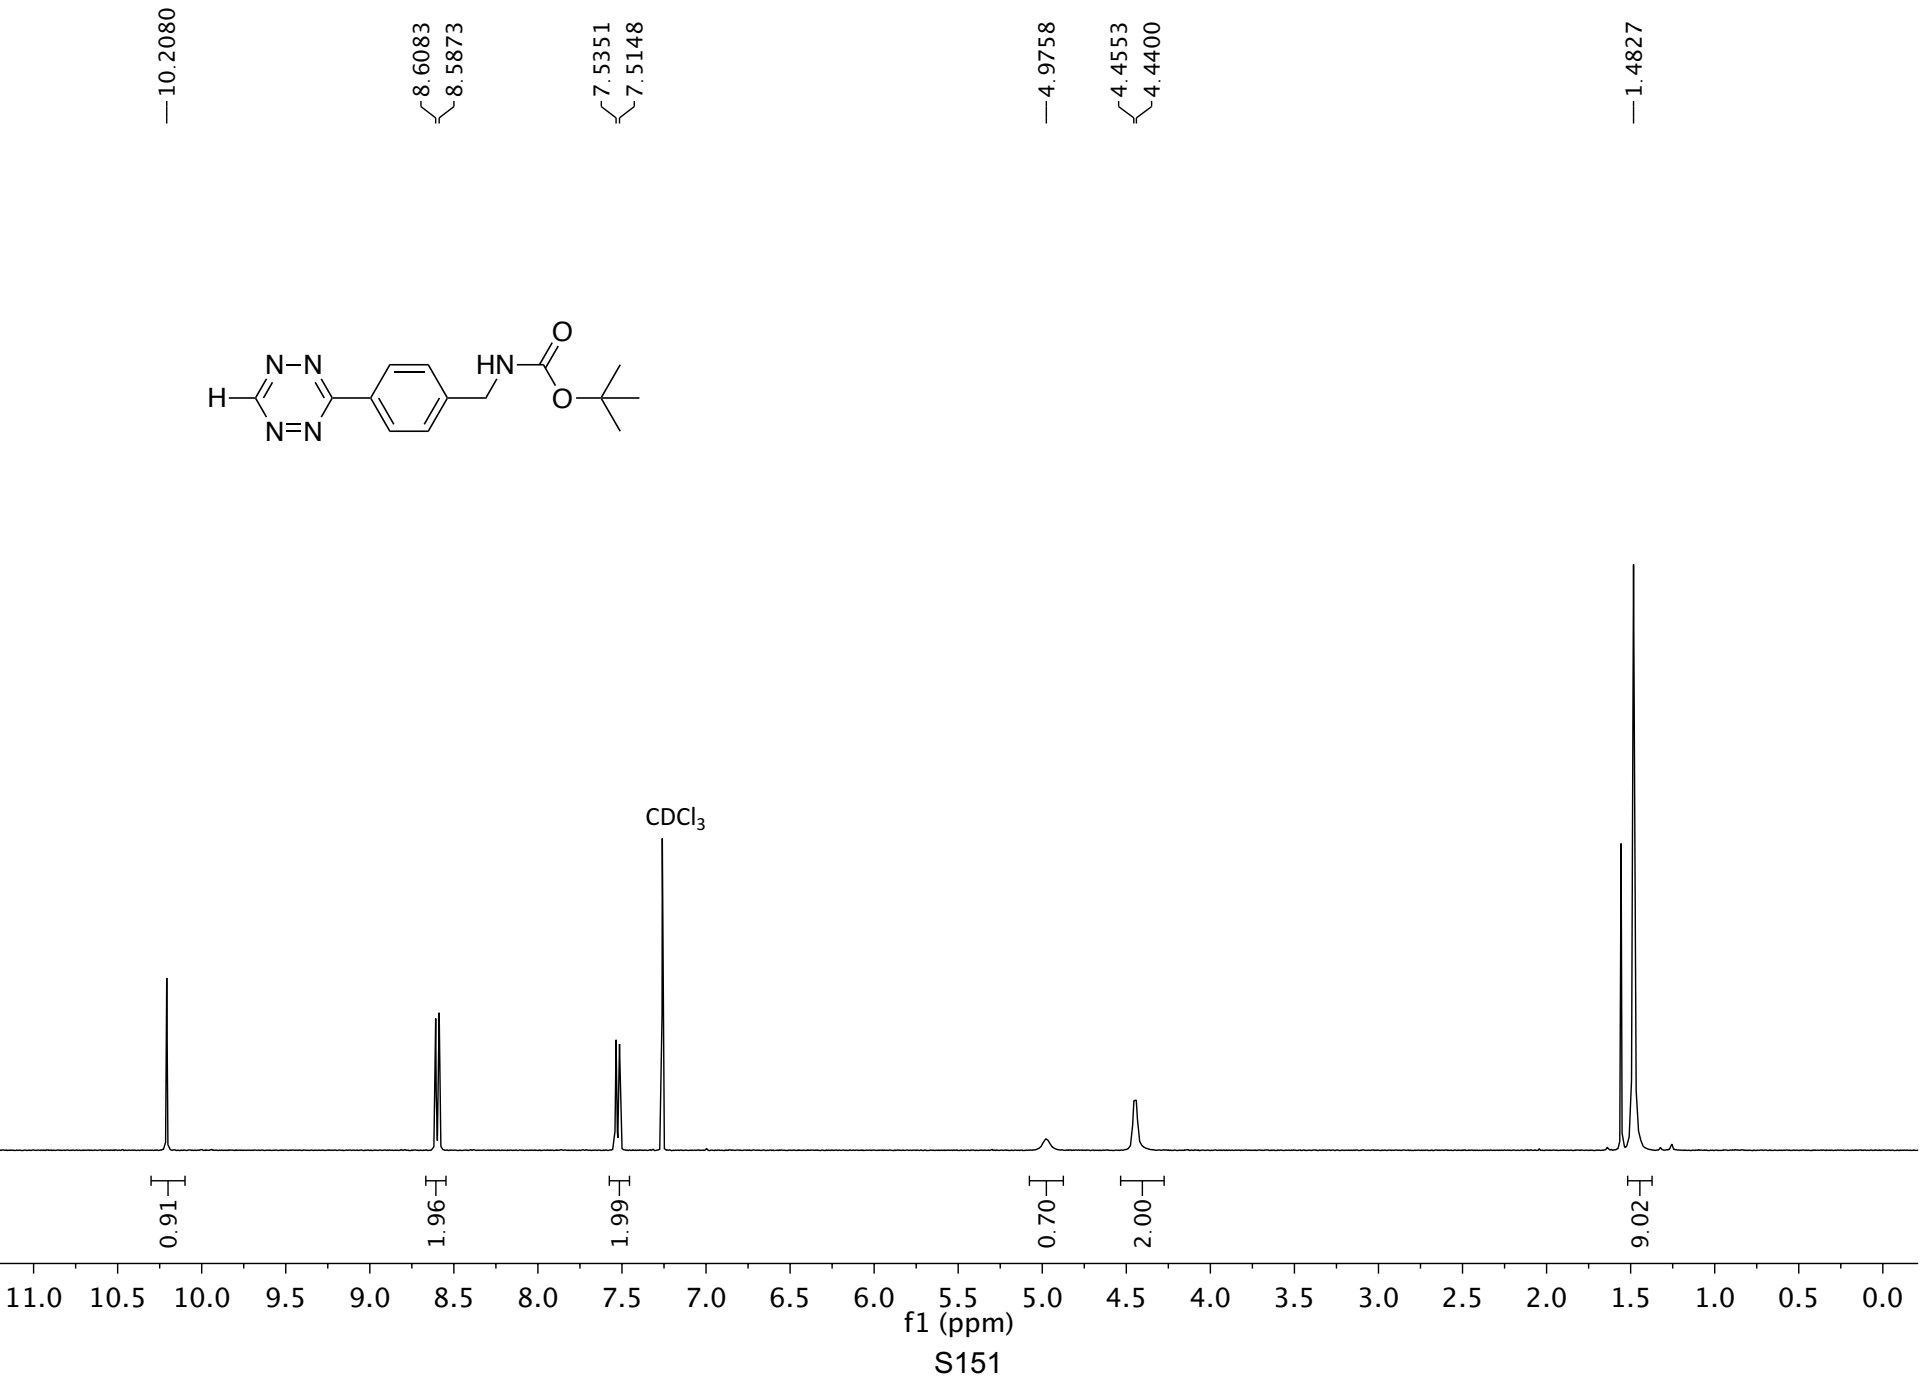

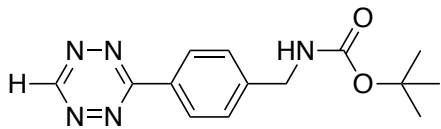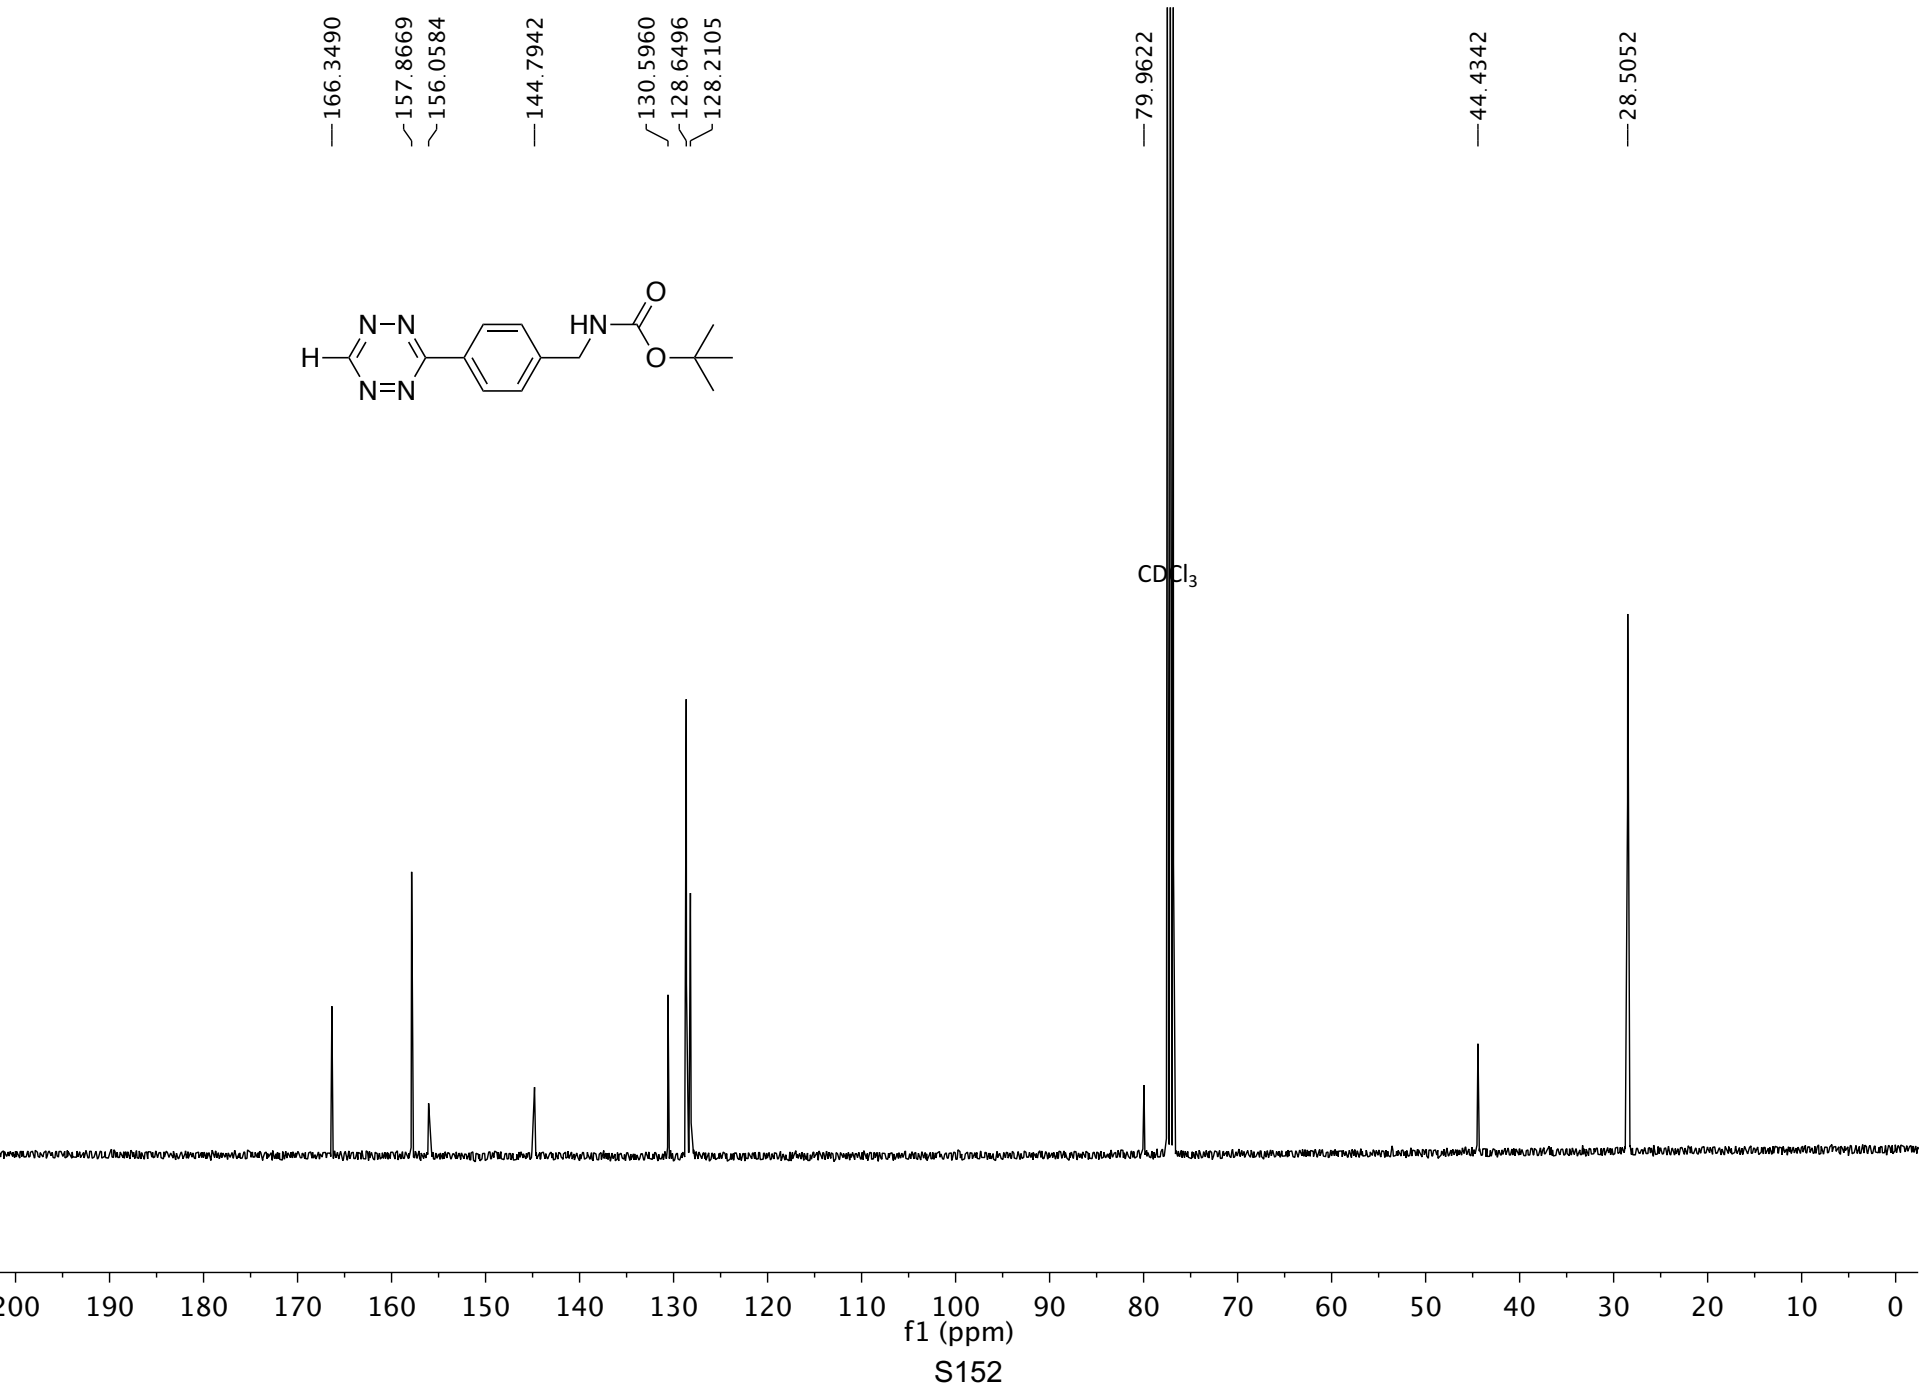



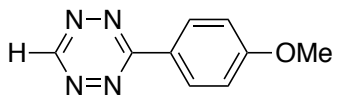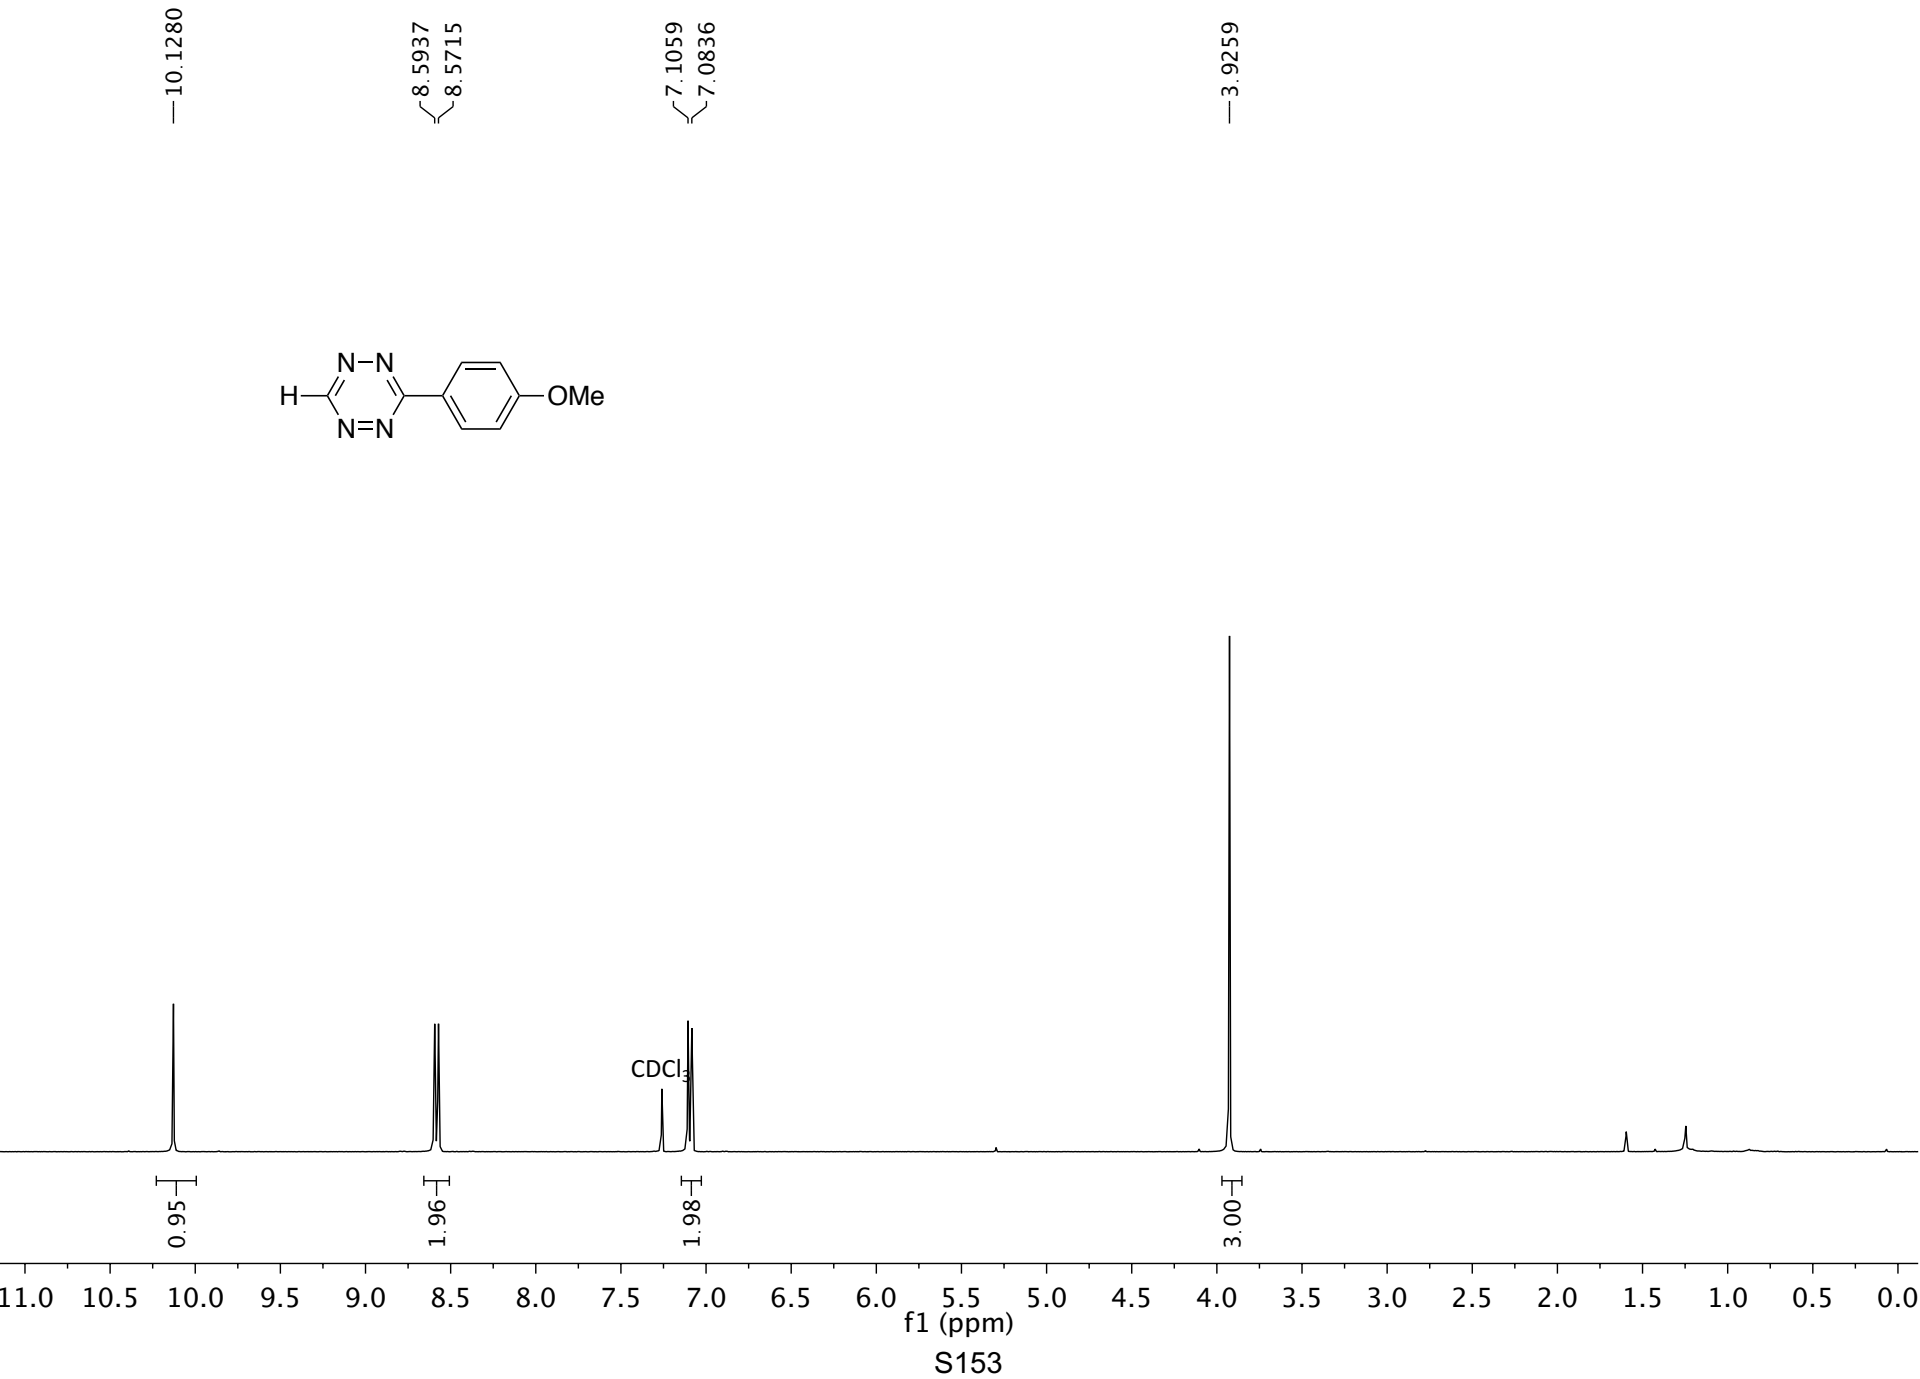

166.2113  
163.8562  
157.4383

130.2842  
124.0024  
114.9229

55.6702

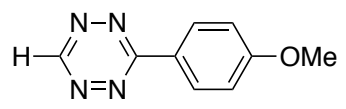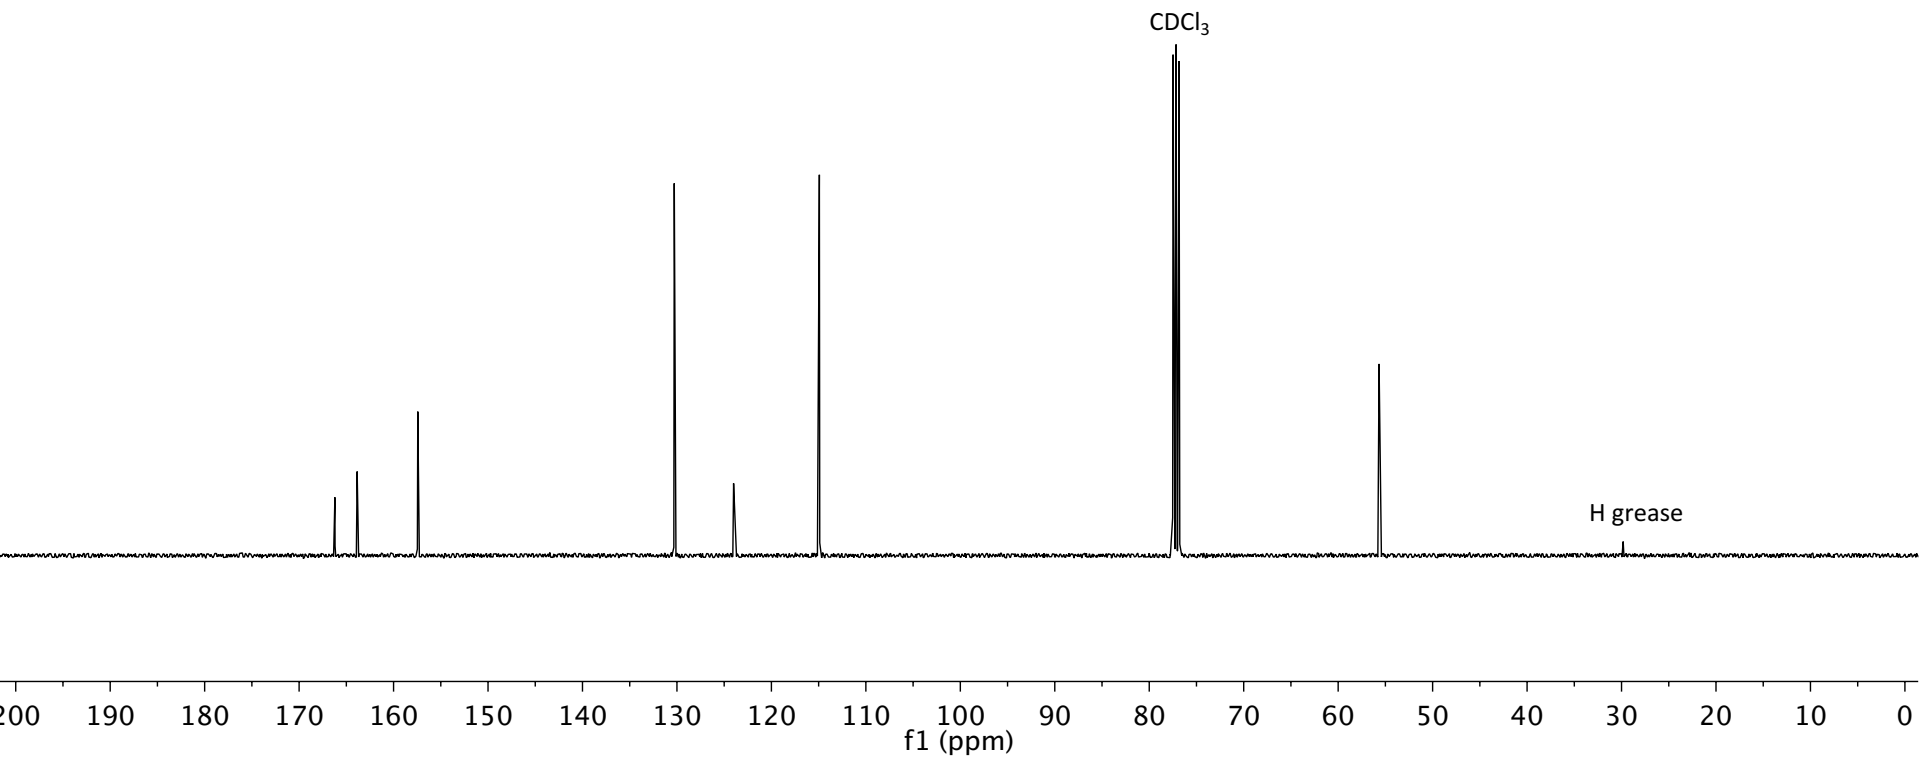

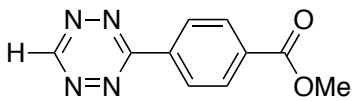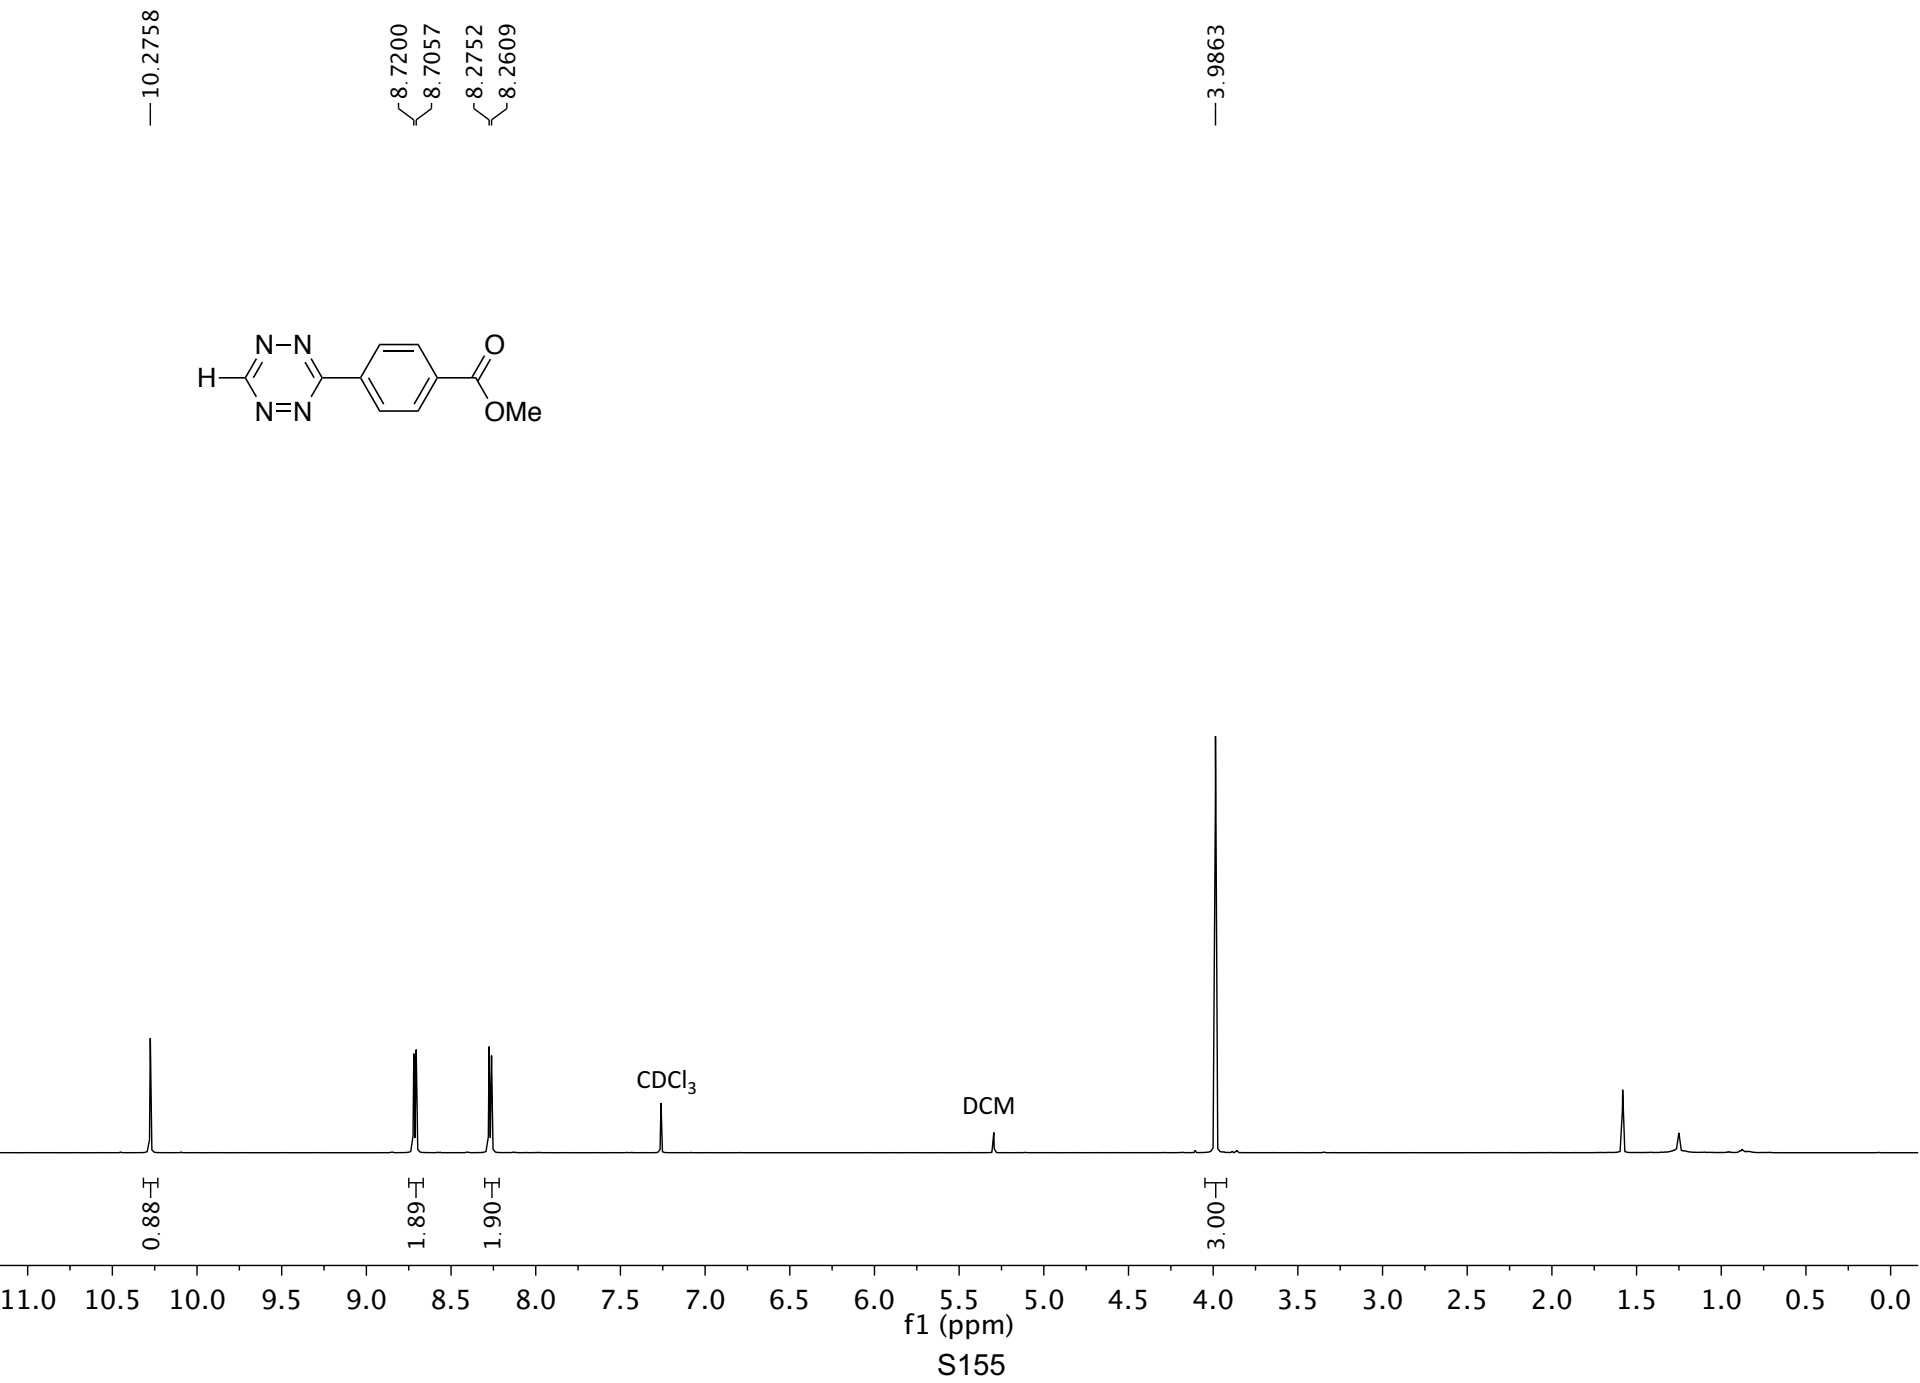

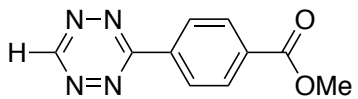

166.3679  
166.1193  
— 158.1145

135.6053  
134.2838  
130.5762  
128.3920

— 52.6657

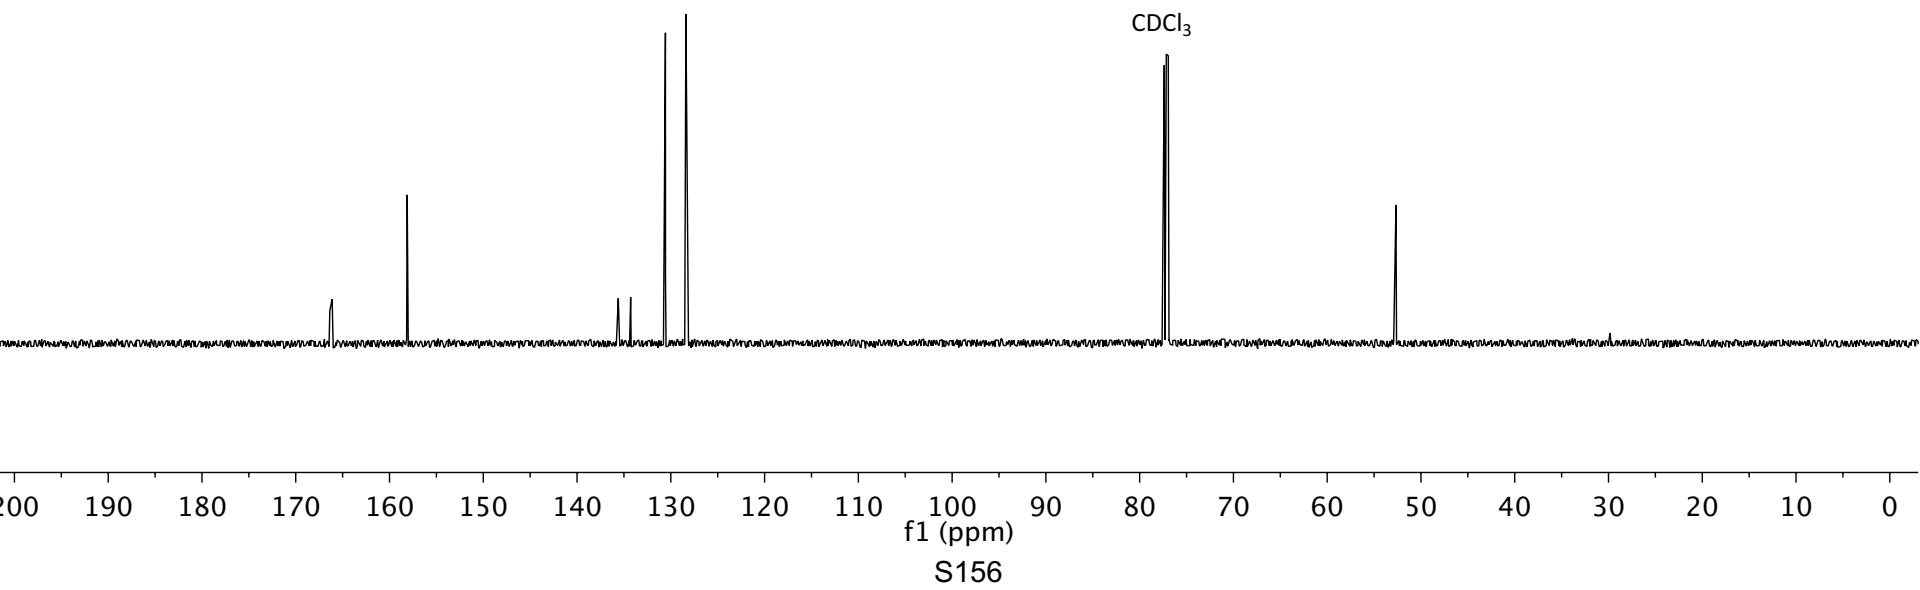

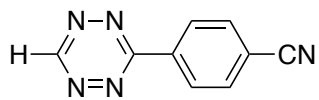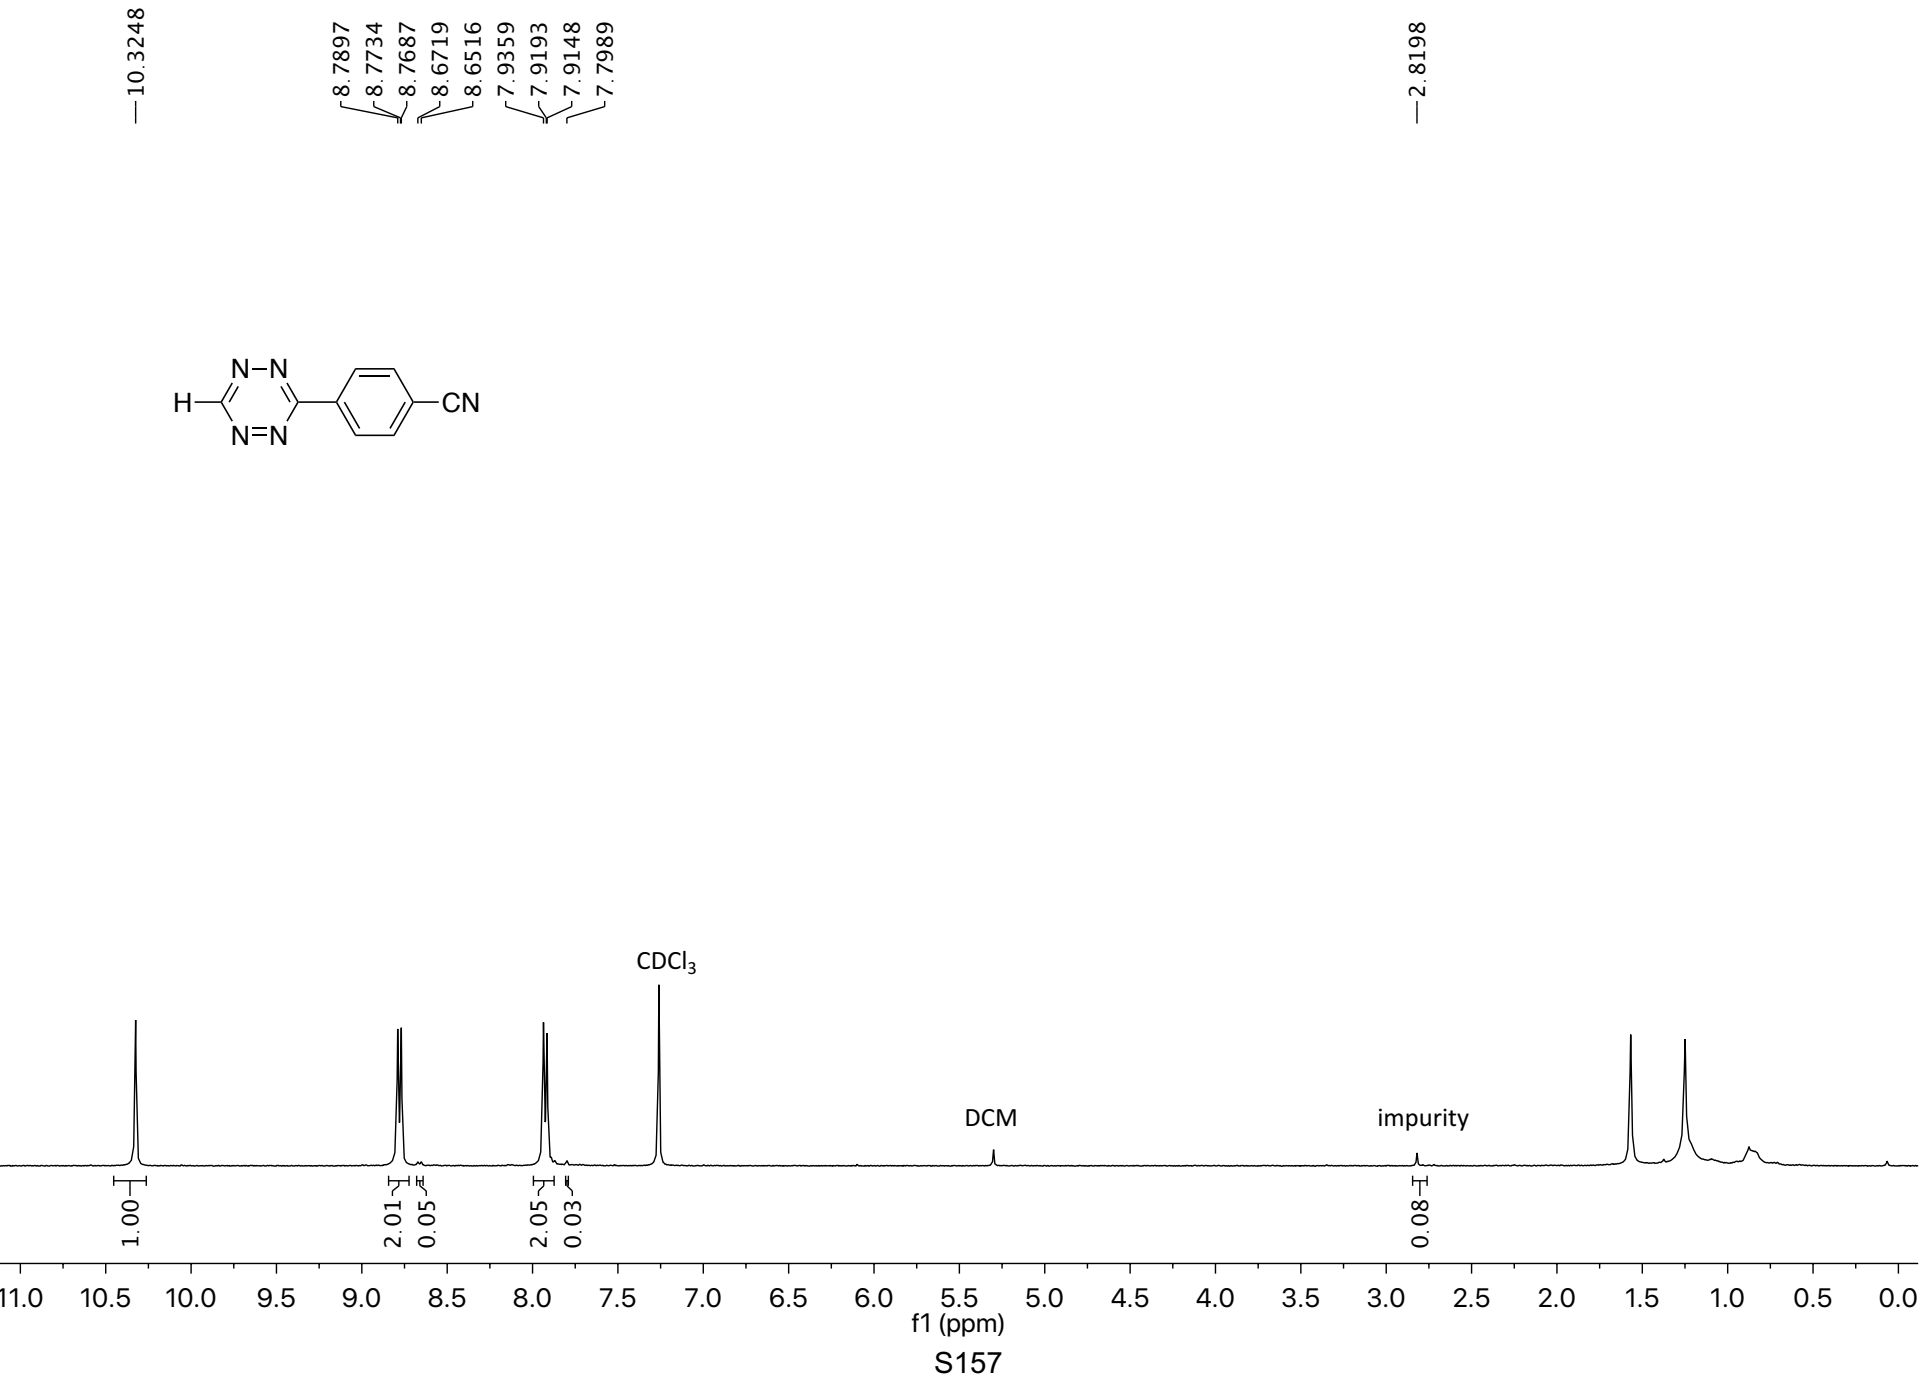

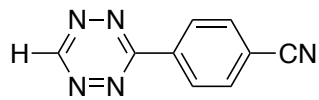

— 165.4929  
— 158.2780  
~ 135.6769  
~ 133.2038  
~ 128.8300  
~ 118.0979  
~ 116.7450

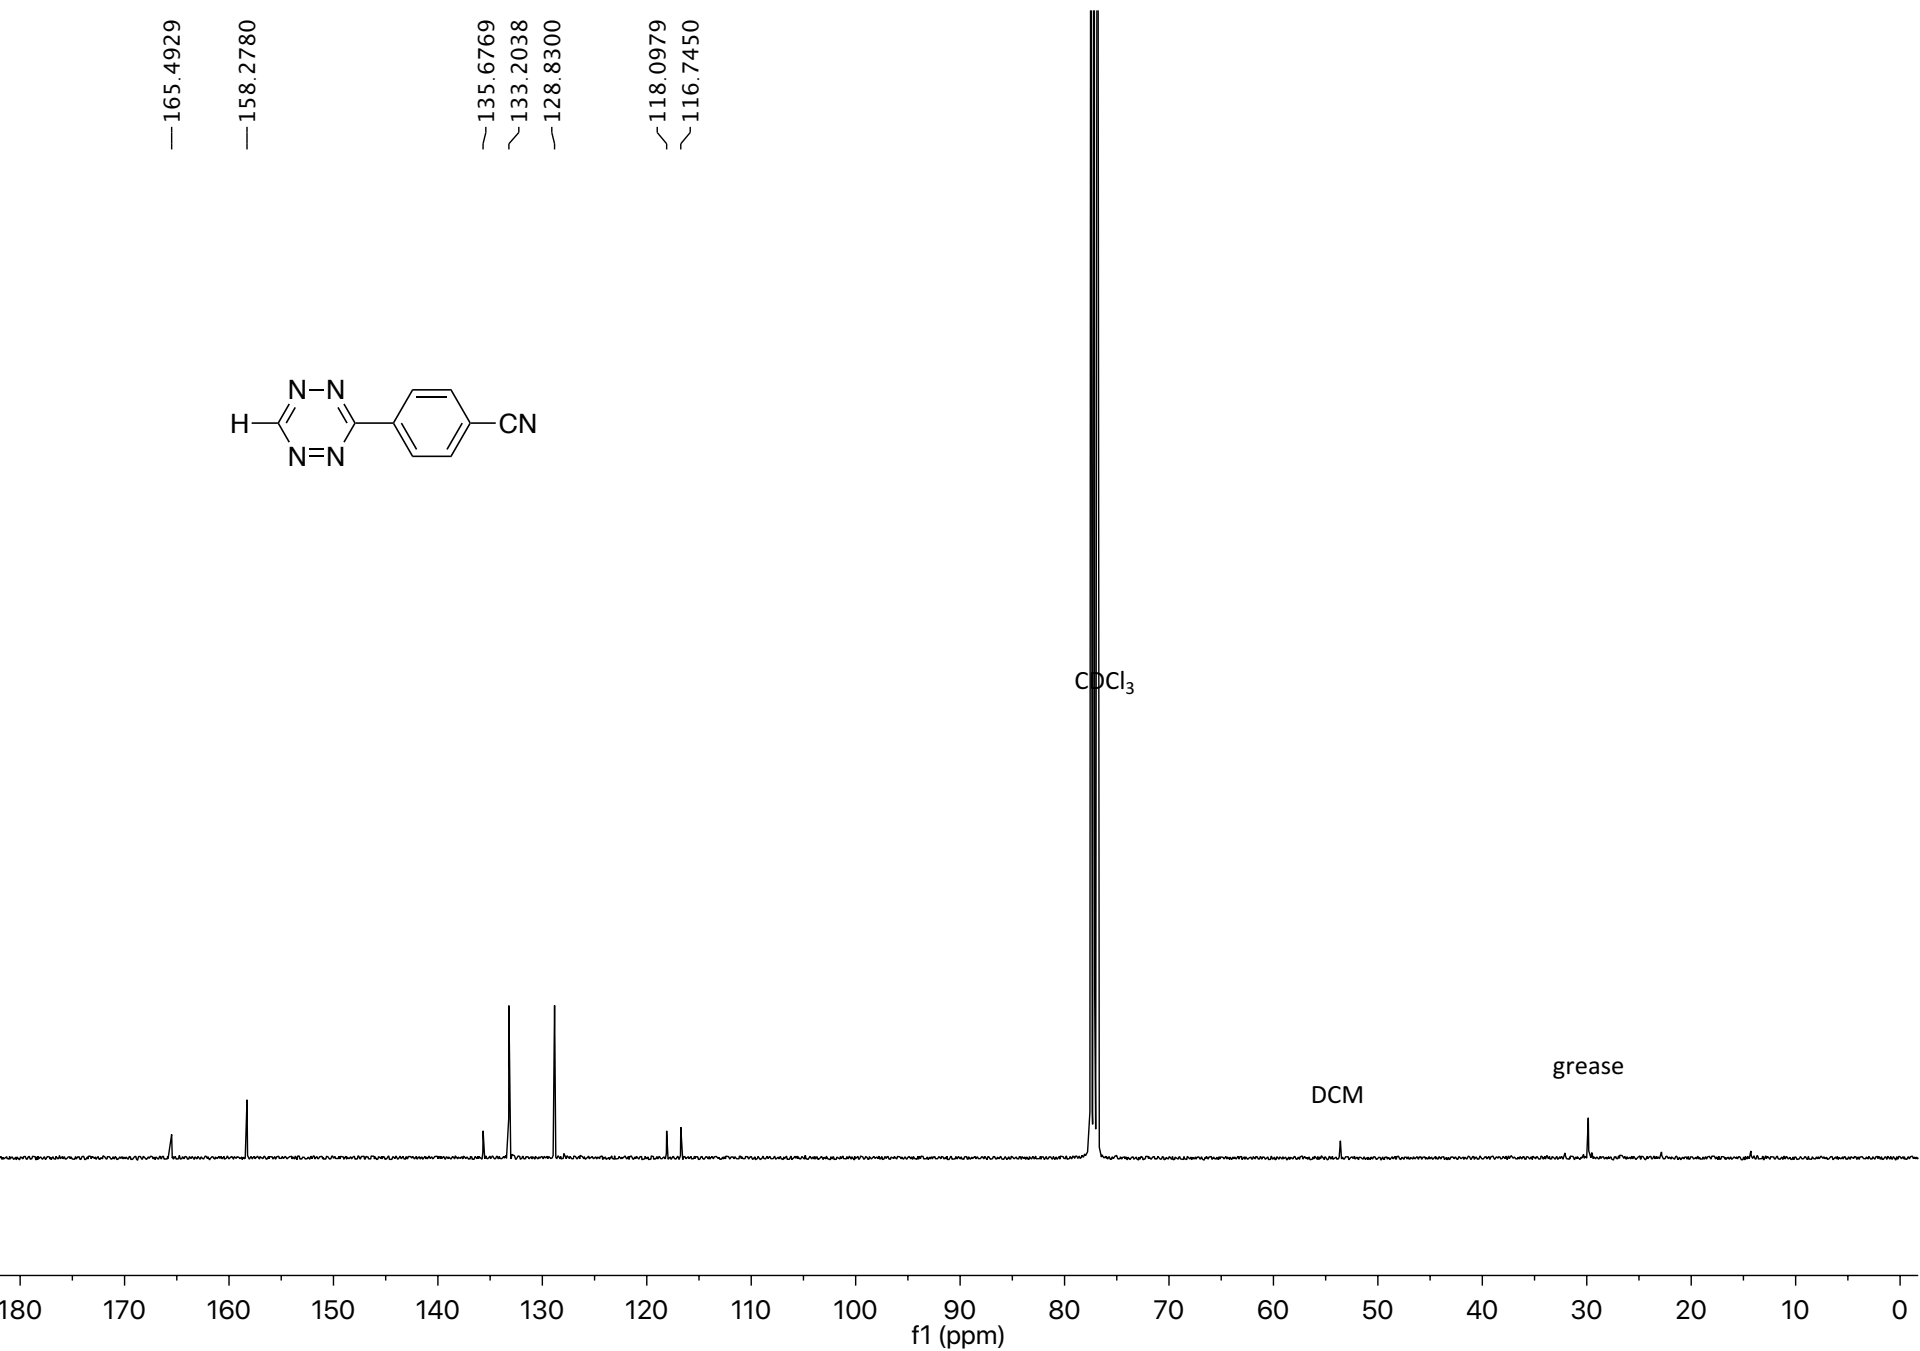

—10.2136

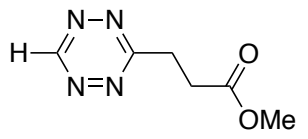

3.7103  
3.6928  
3.6860  
3.6750  
3.1090  
3.0914  
3.0739

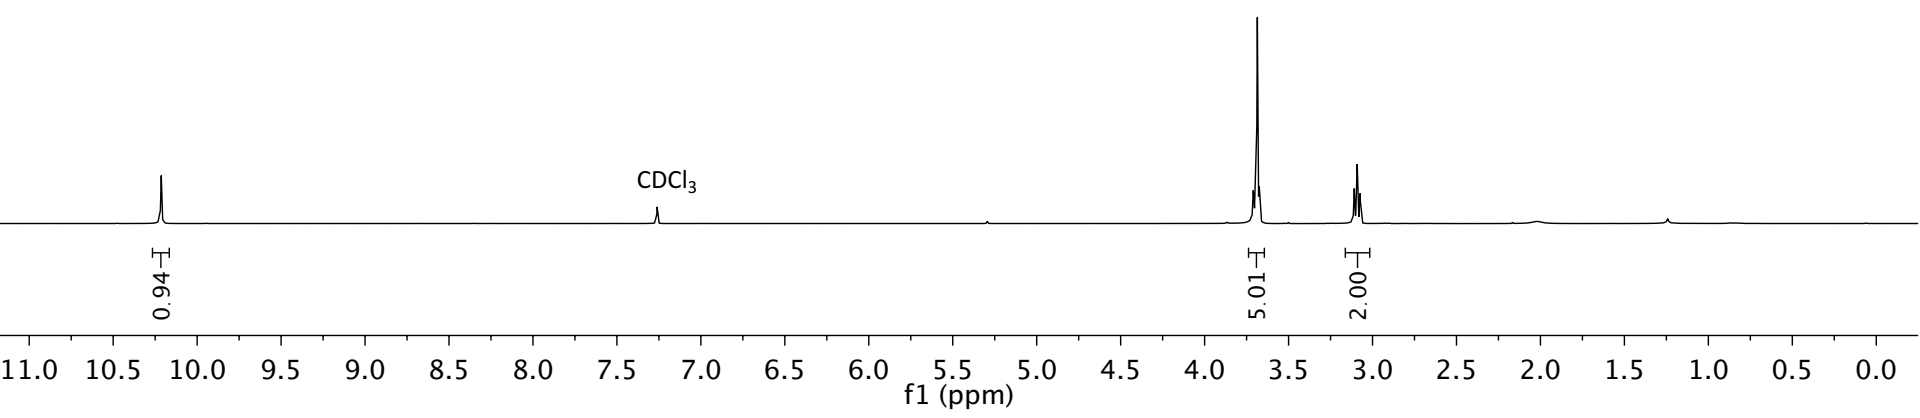

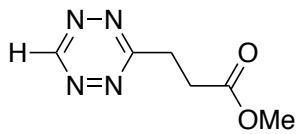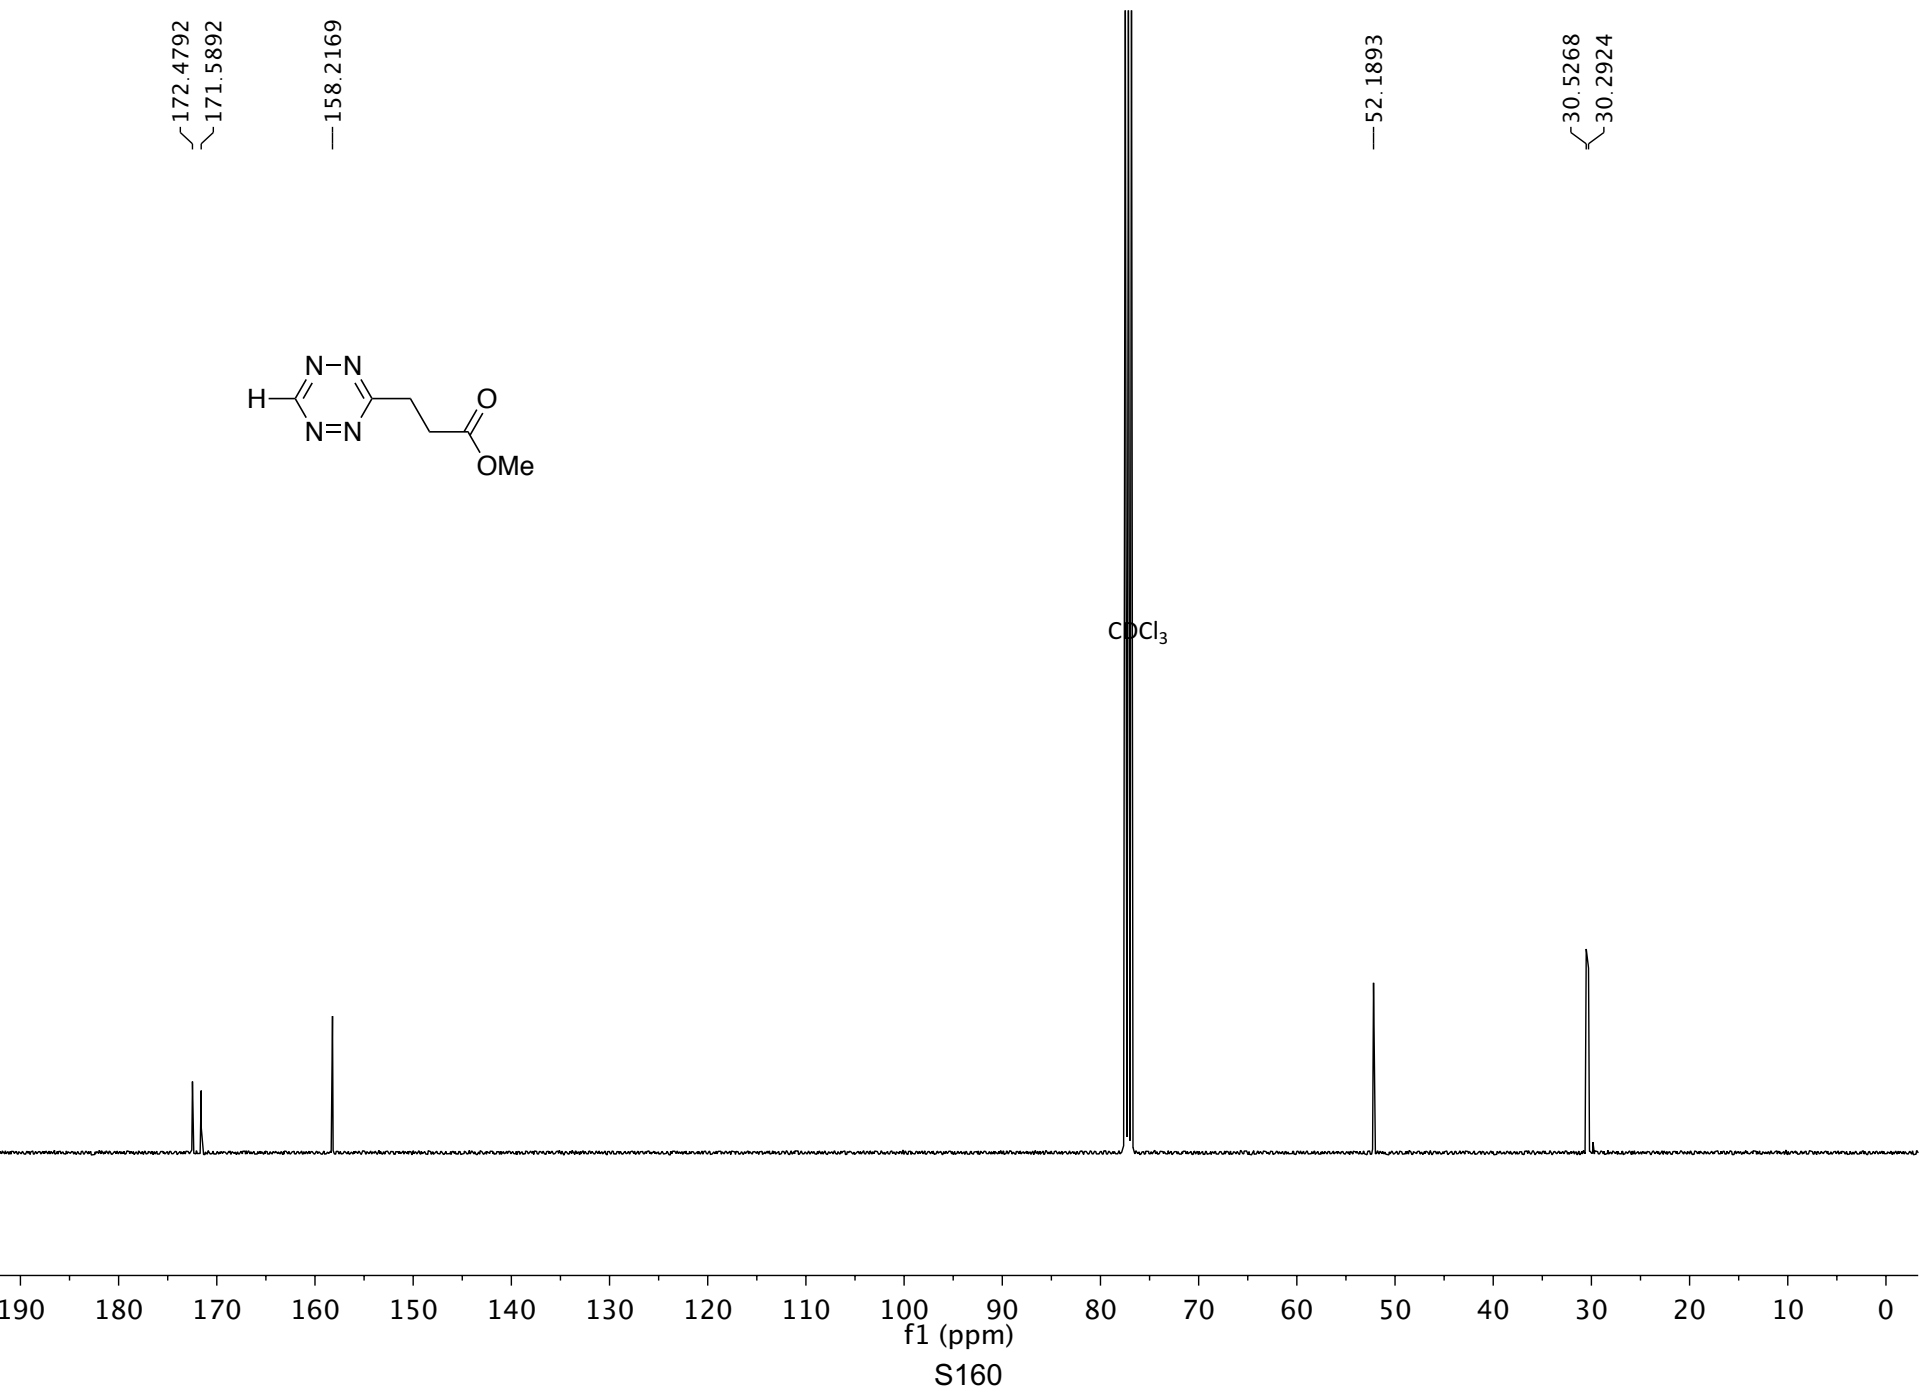



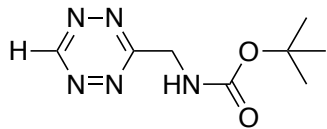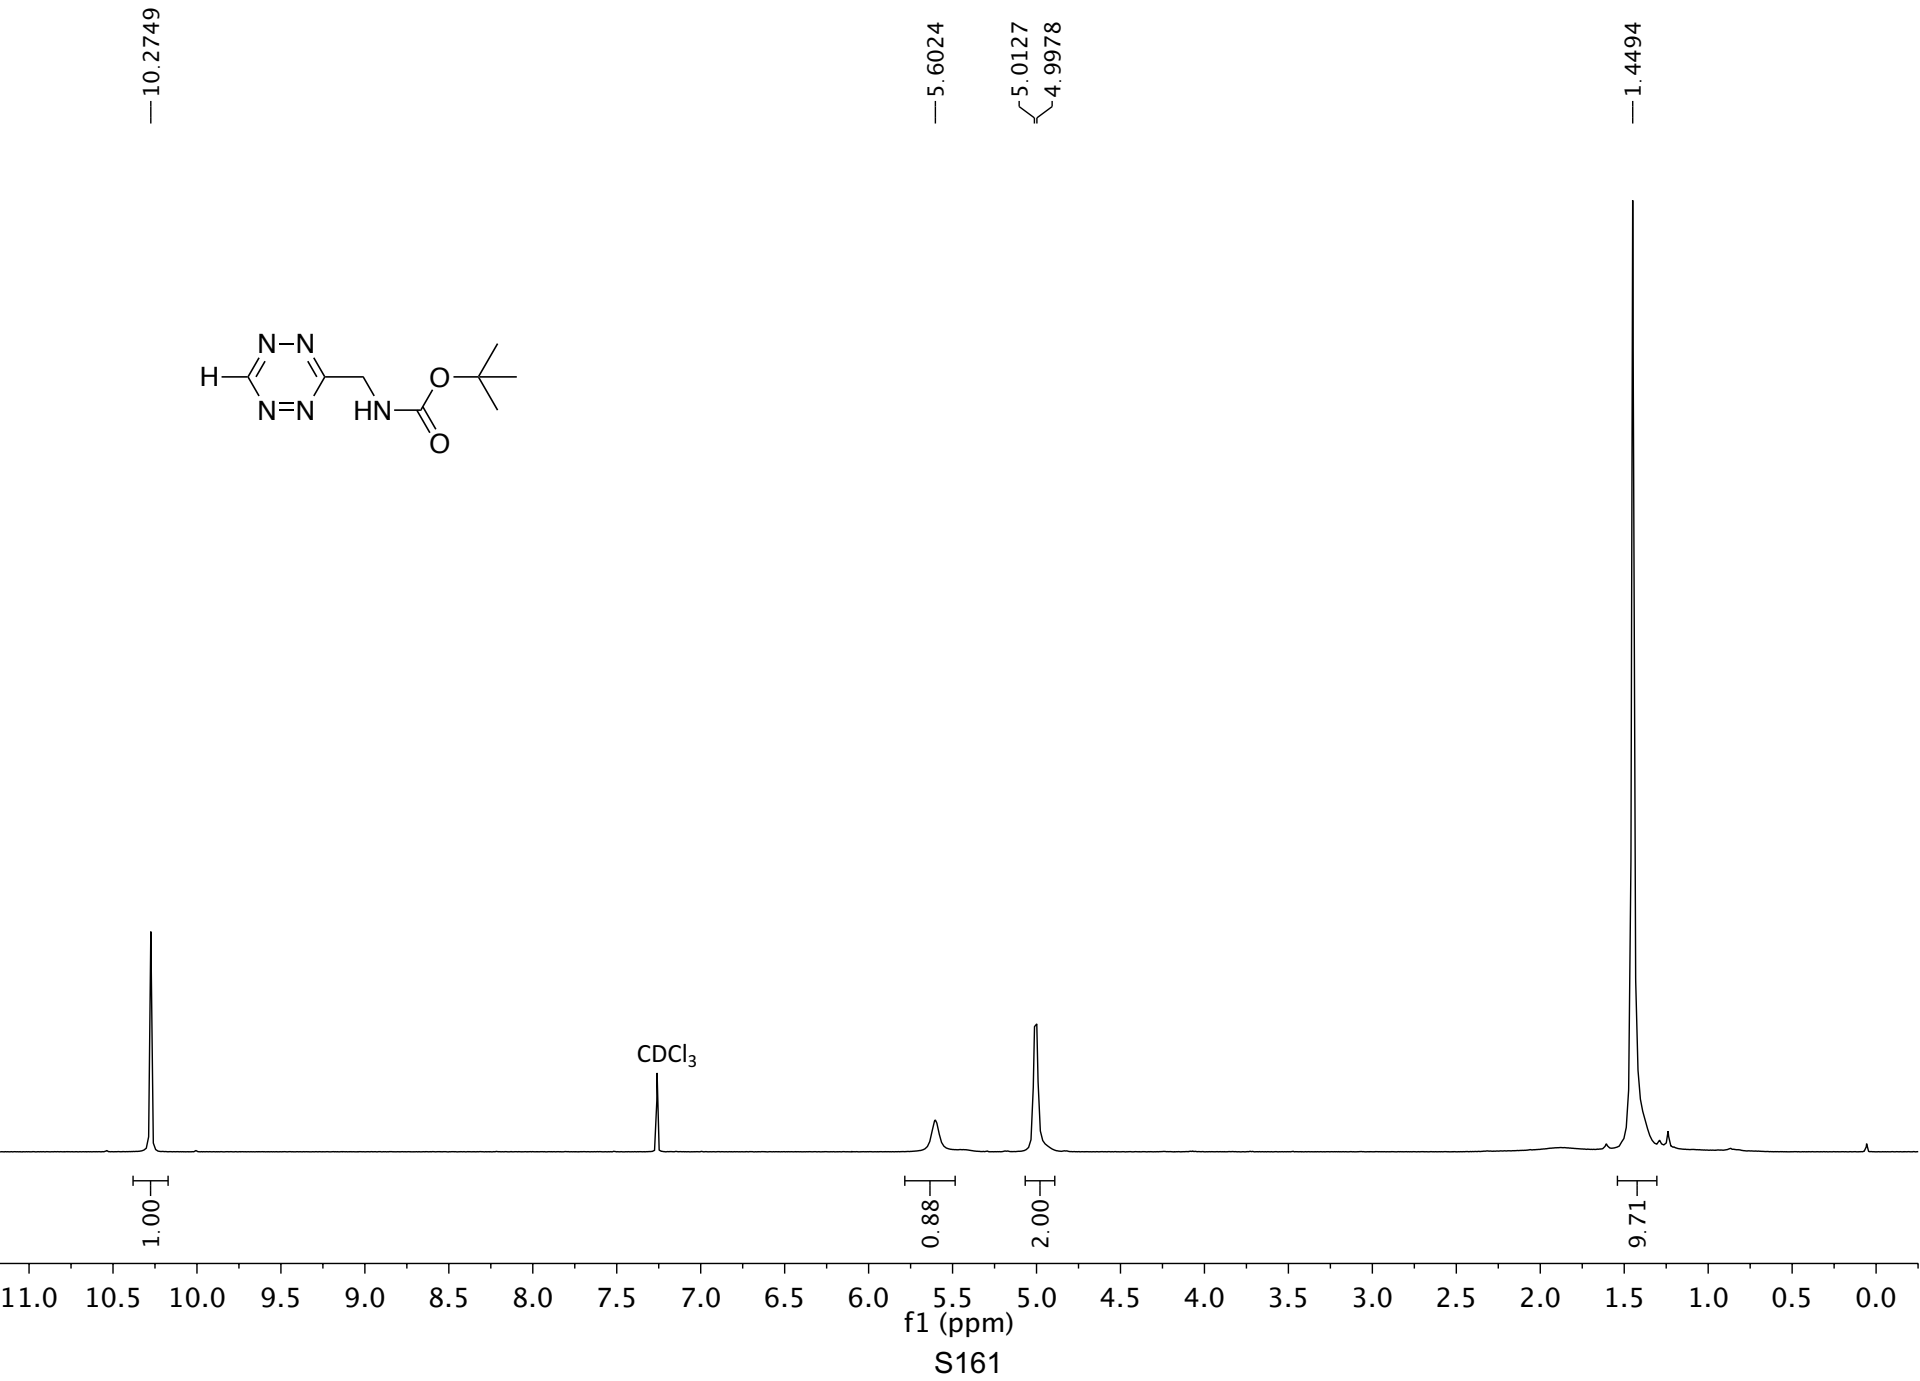

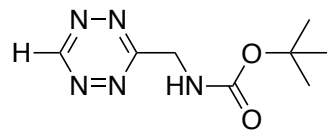

—169.5270

—158.8205

—155.8985

—80.6595

—43.8886

—28.4100

CDCl<sub>3</sub>

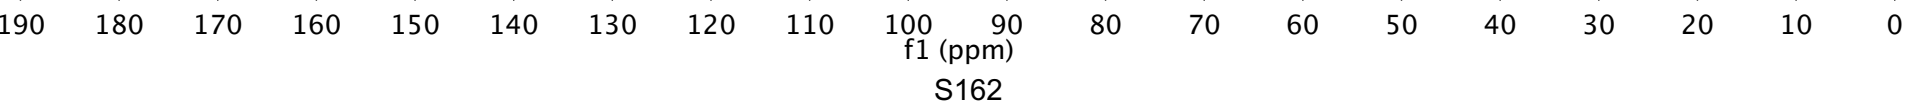

—10.2205

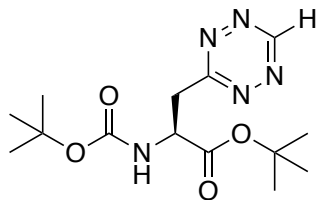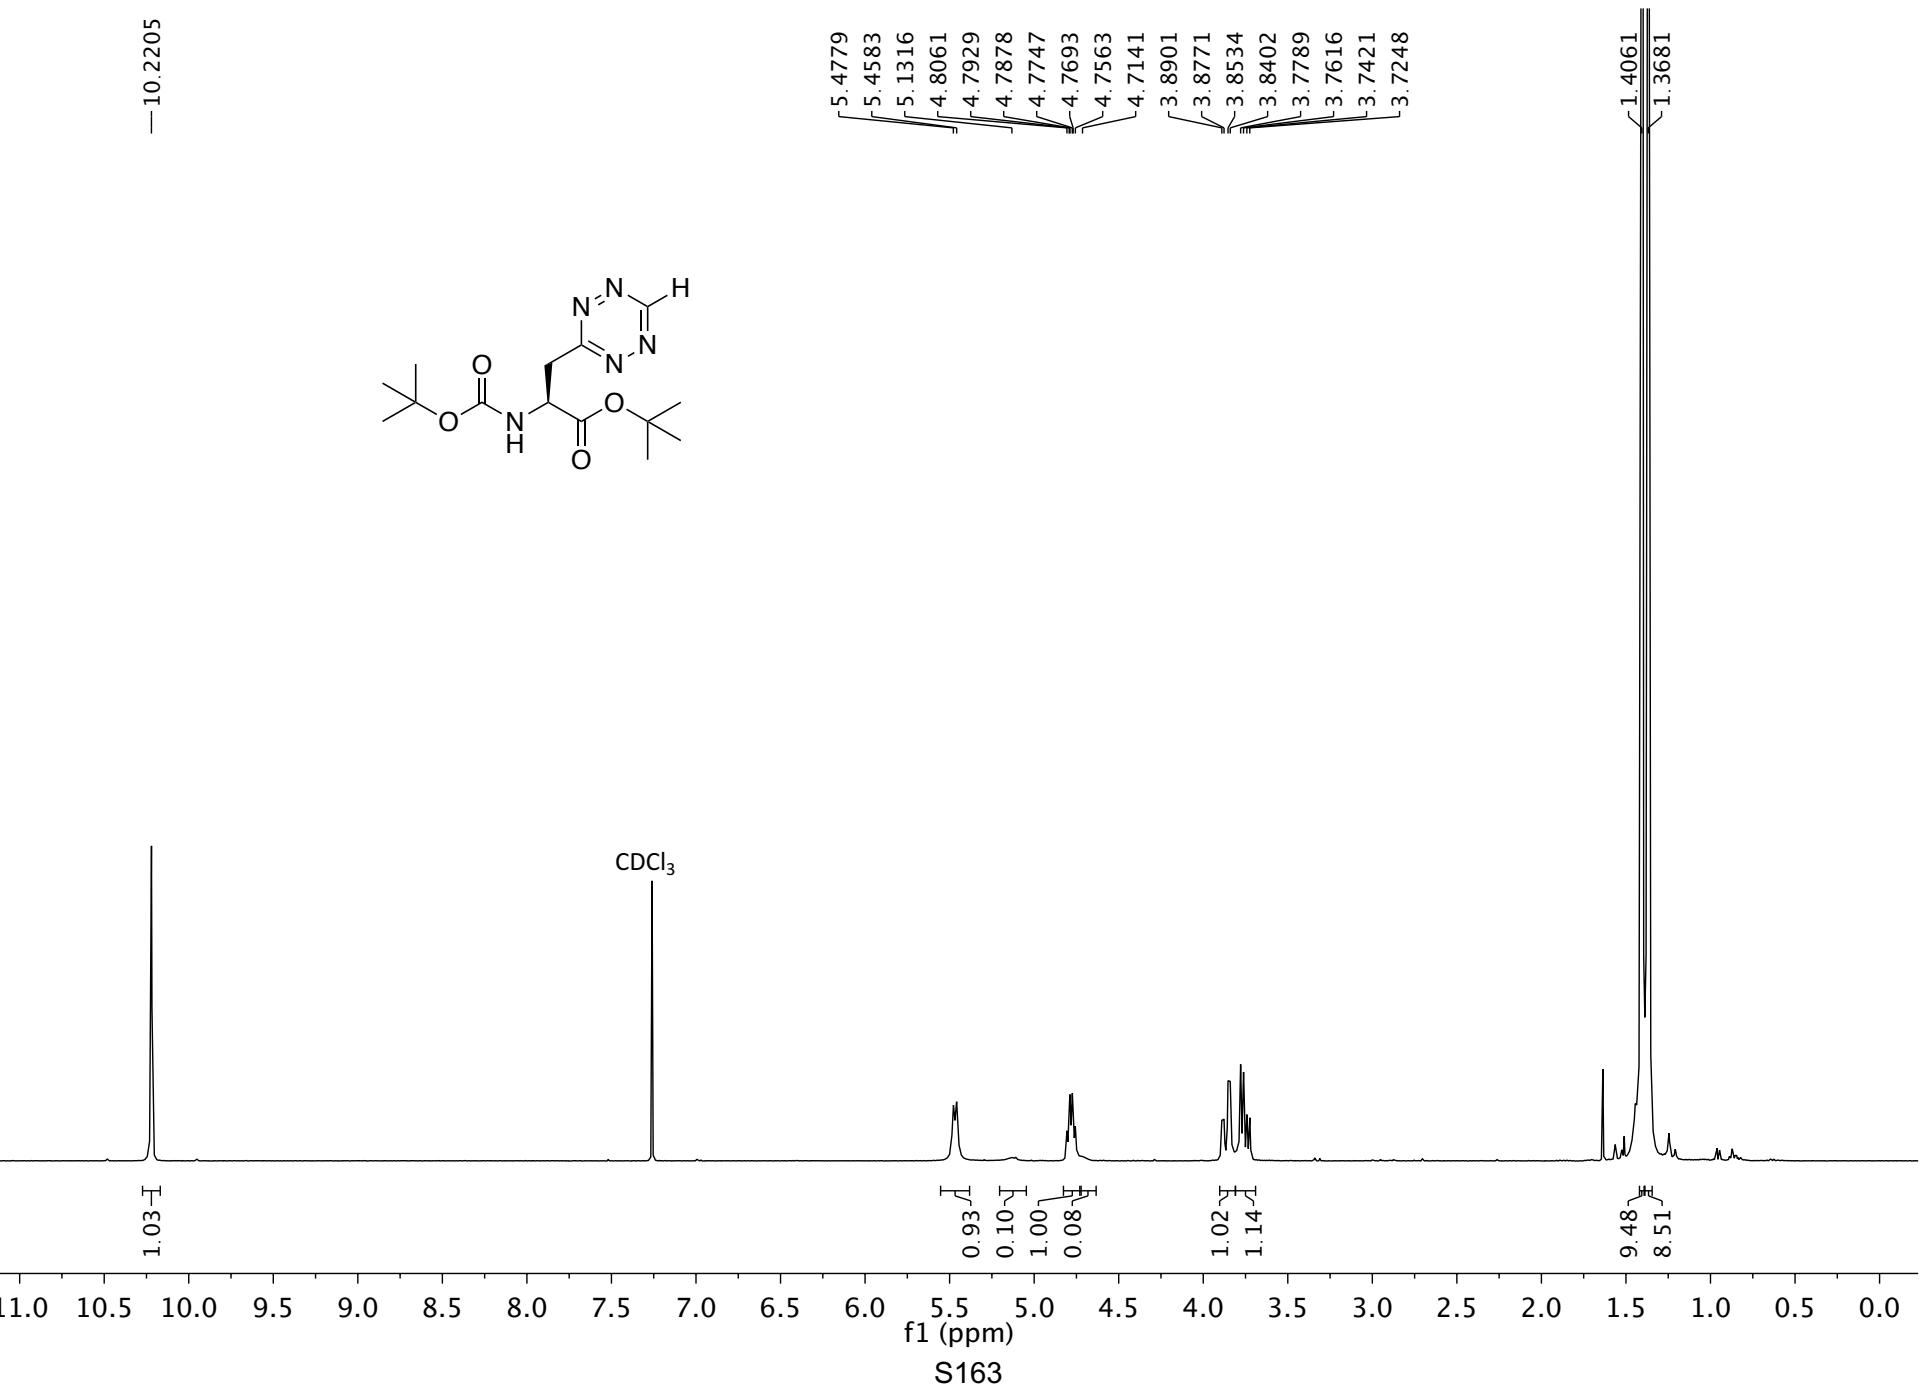

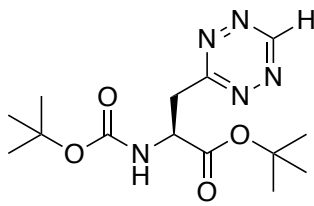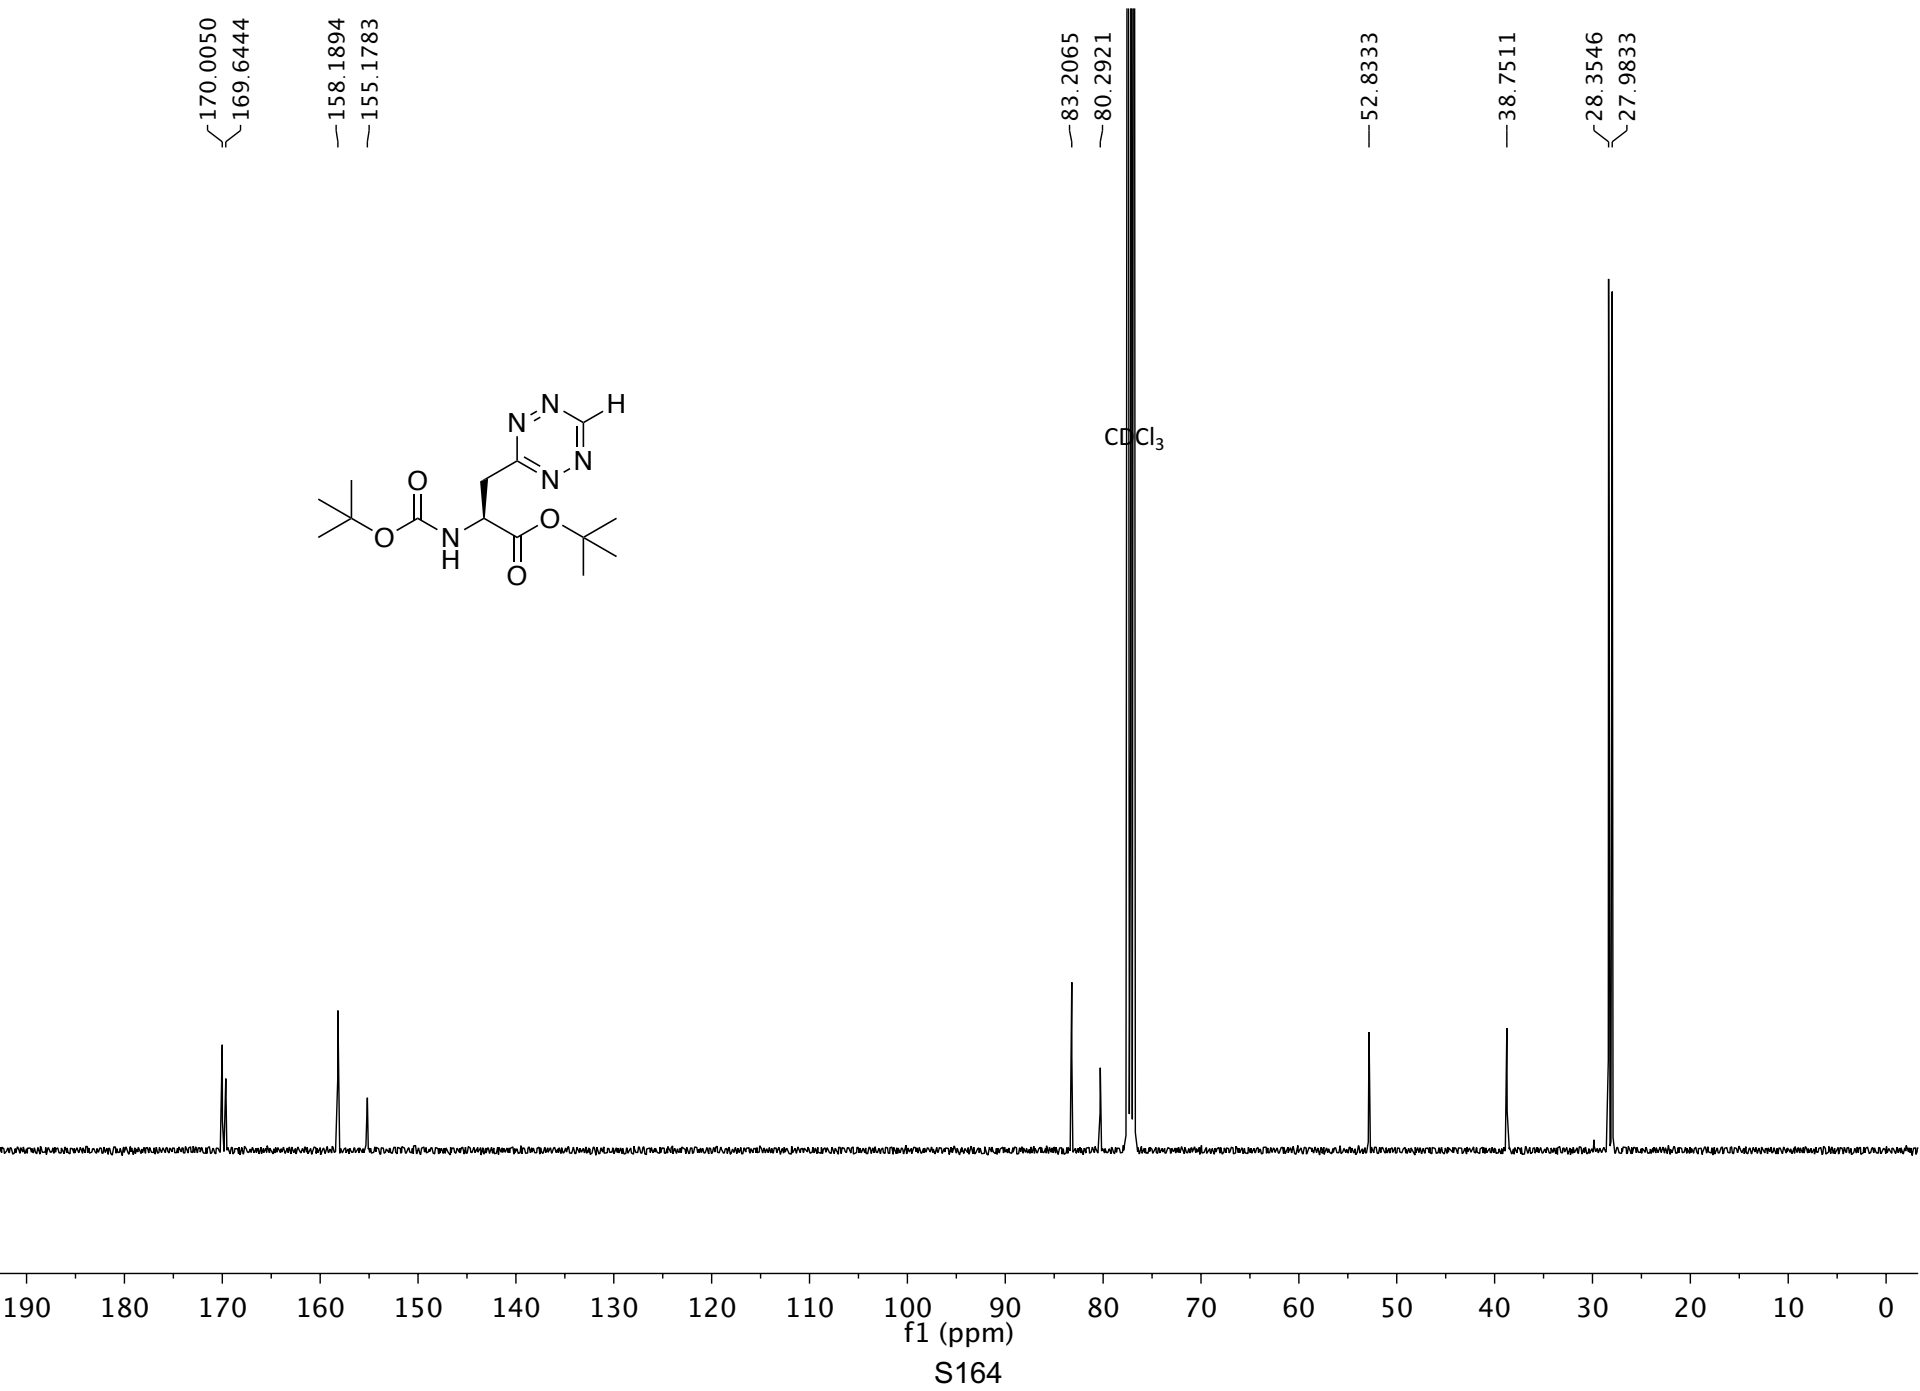

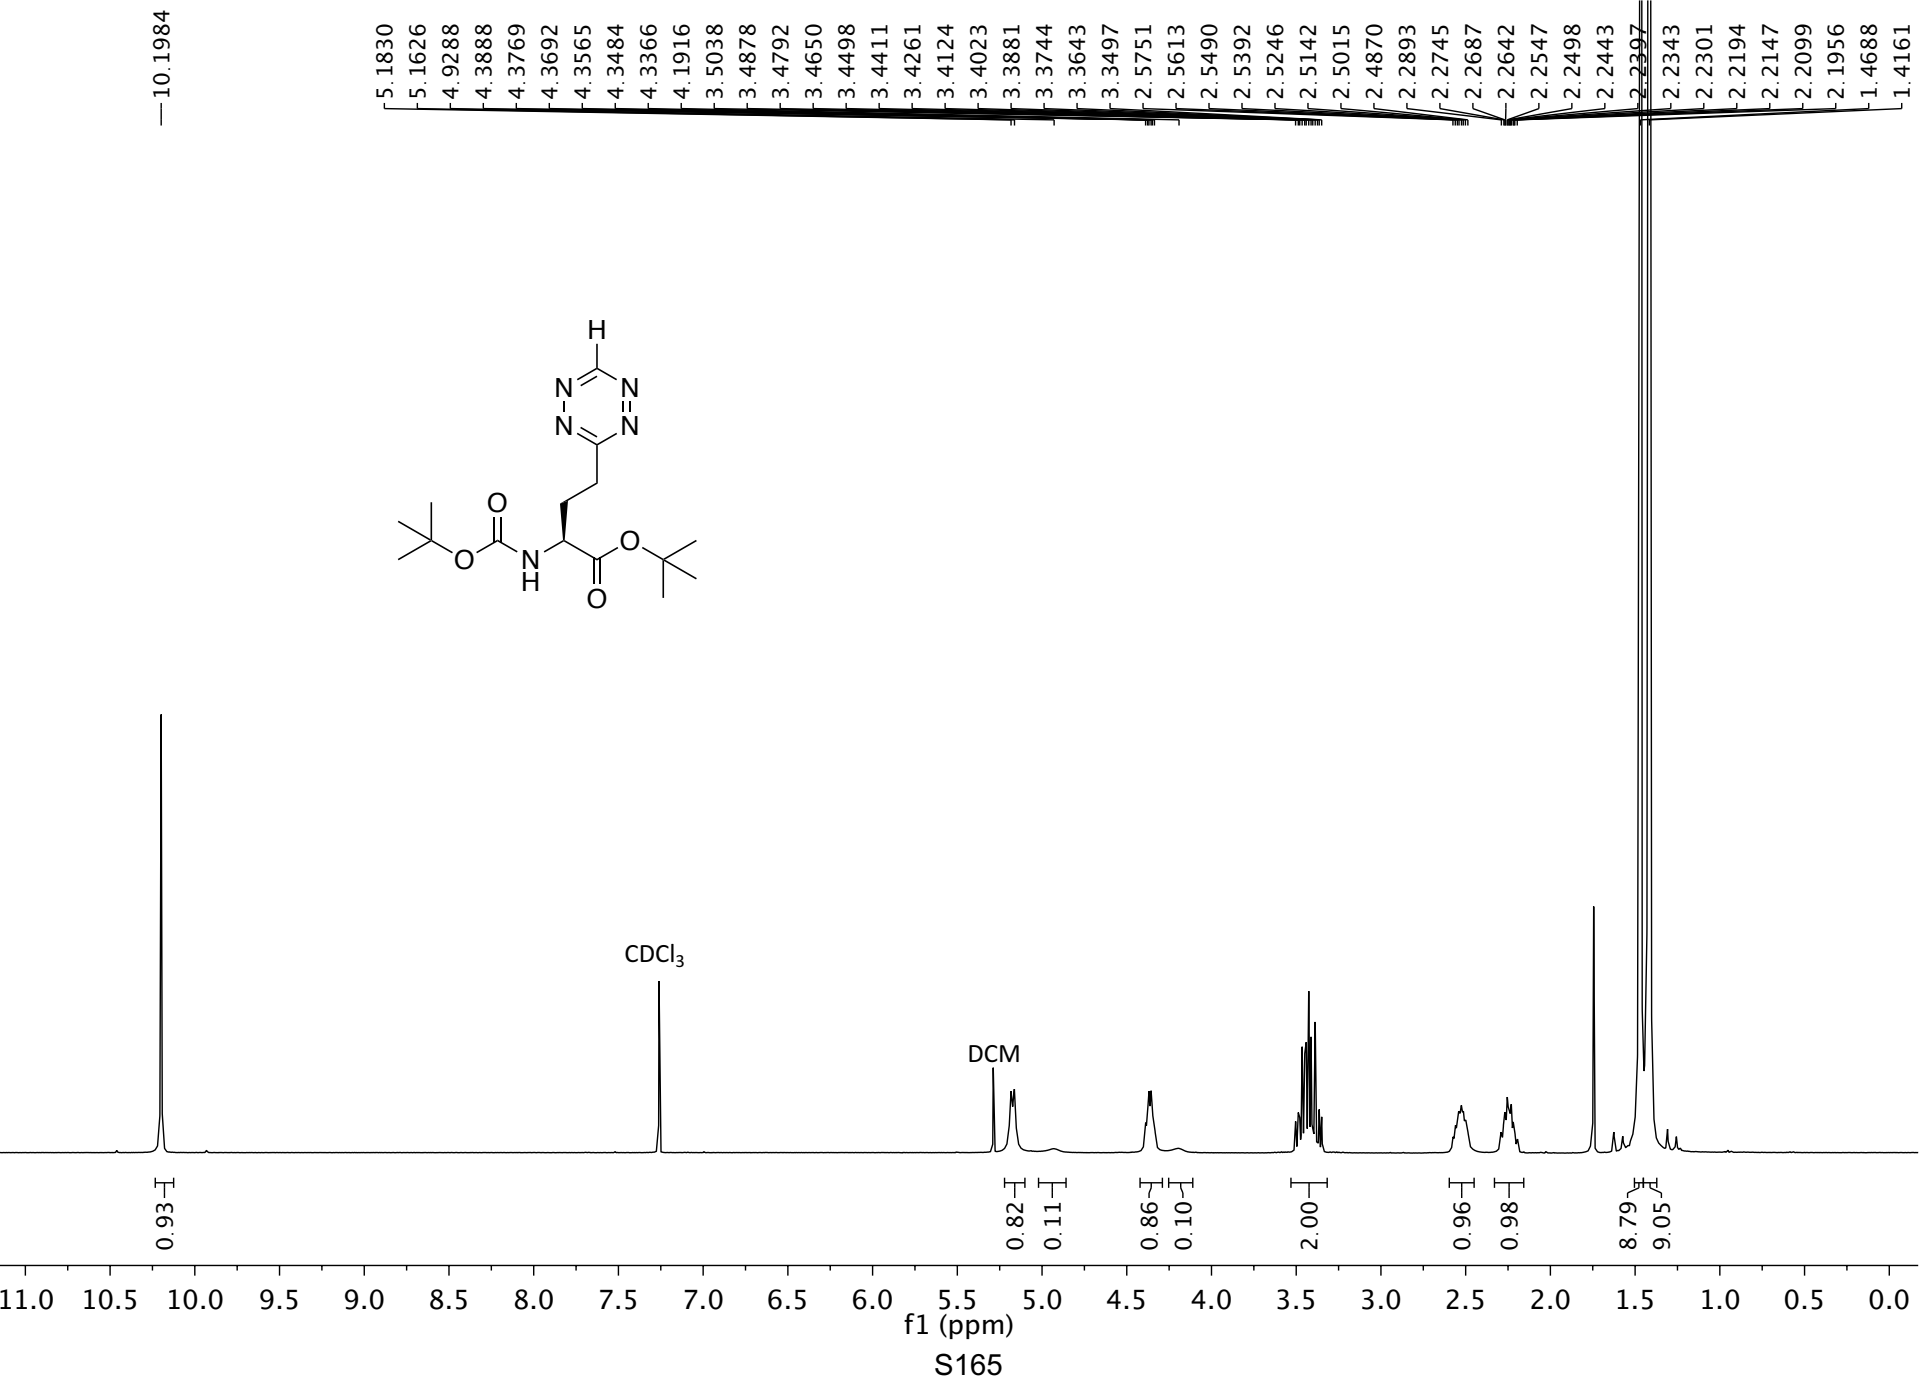

172.4342  
171.2153

158.1214  
155.4430

82.6677  
80.0900

53.5042

31.6020  
31.0536  
28.4266  
28.1369

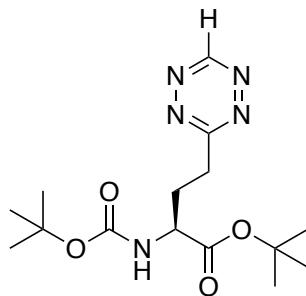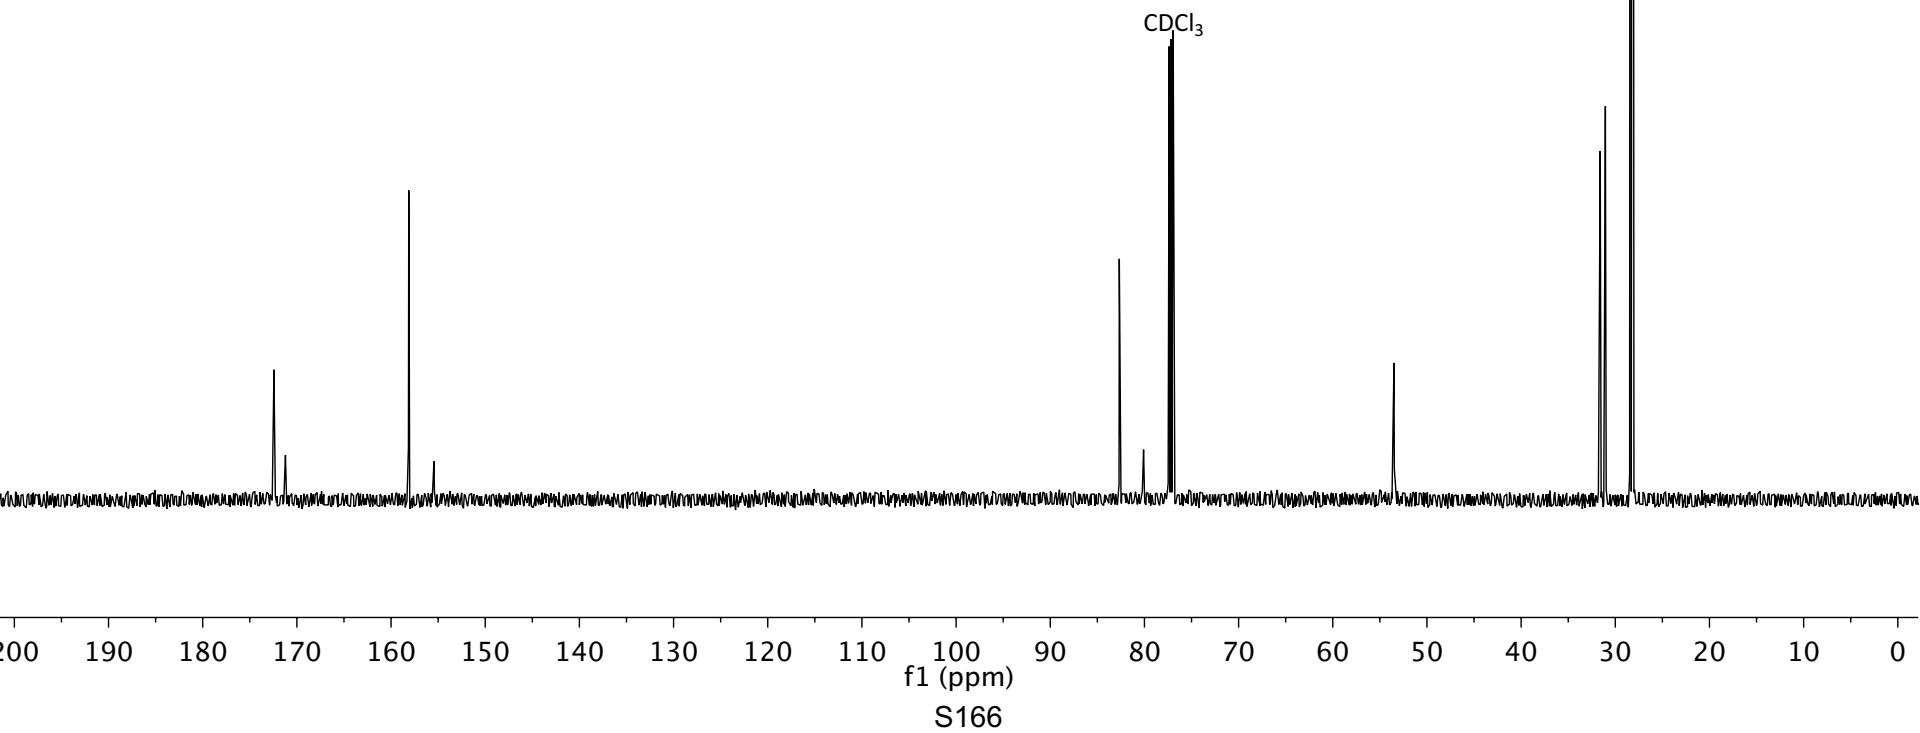

—10.1475

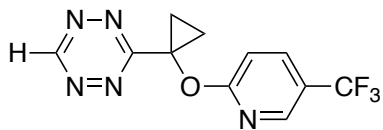

8.2260  
8.2221  
8.2189  
7.8649  
7.8588  
7.8431  
7.8371  
7.0458  
7.0242

2.0874  
2.0728  
2.0654  
2.0516  
1.8004  
1.7866  
1.7794  
1.7646

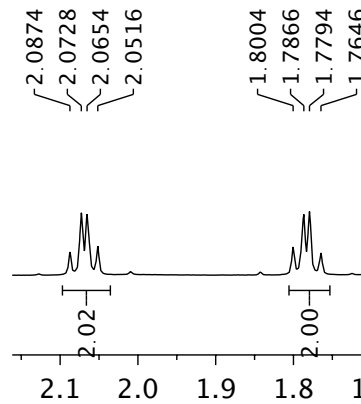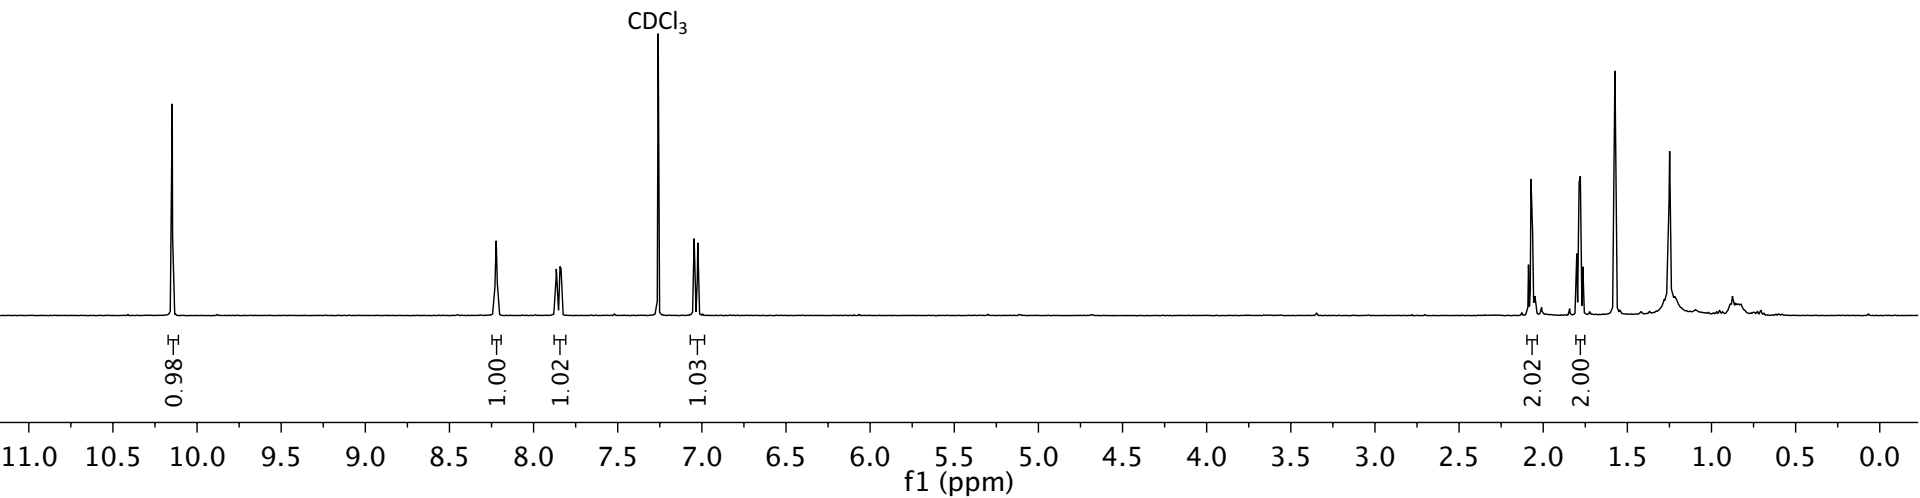

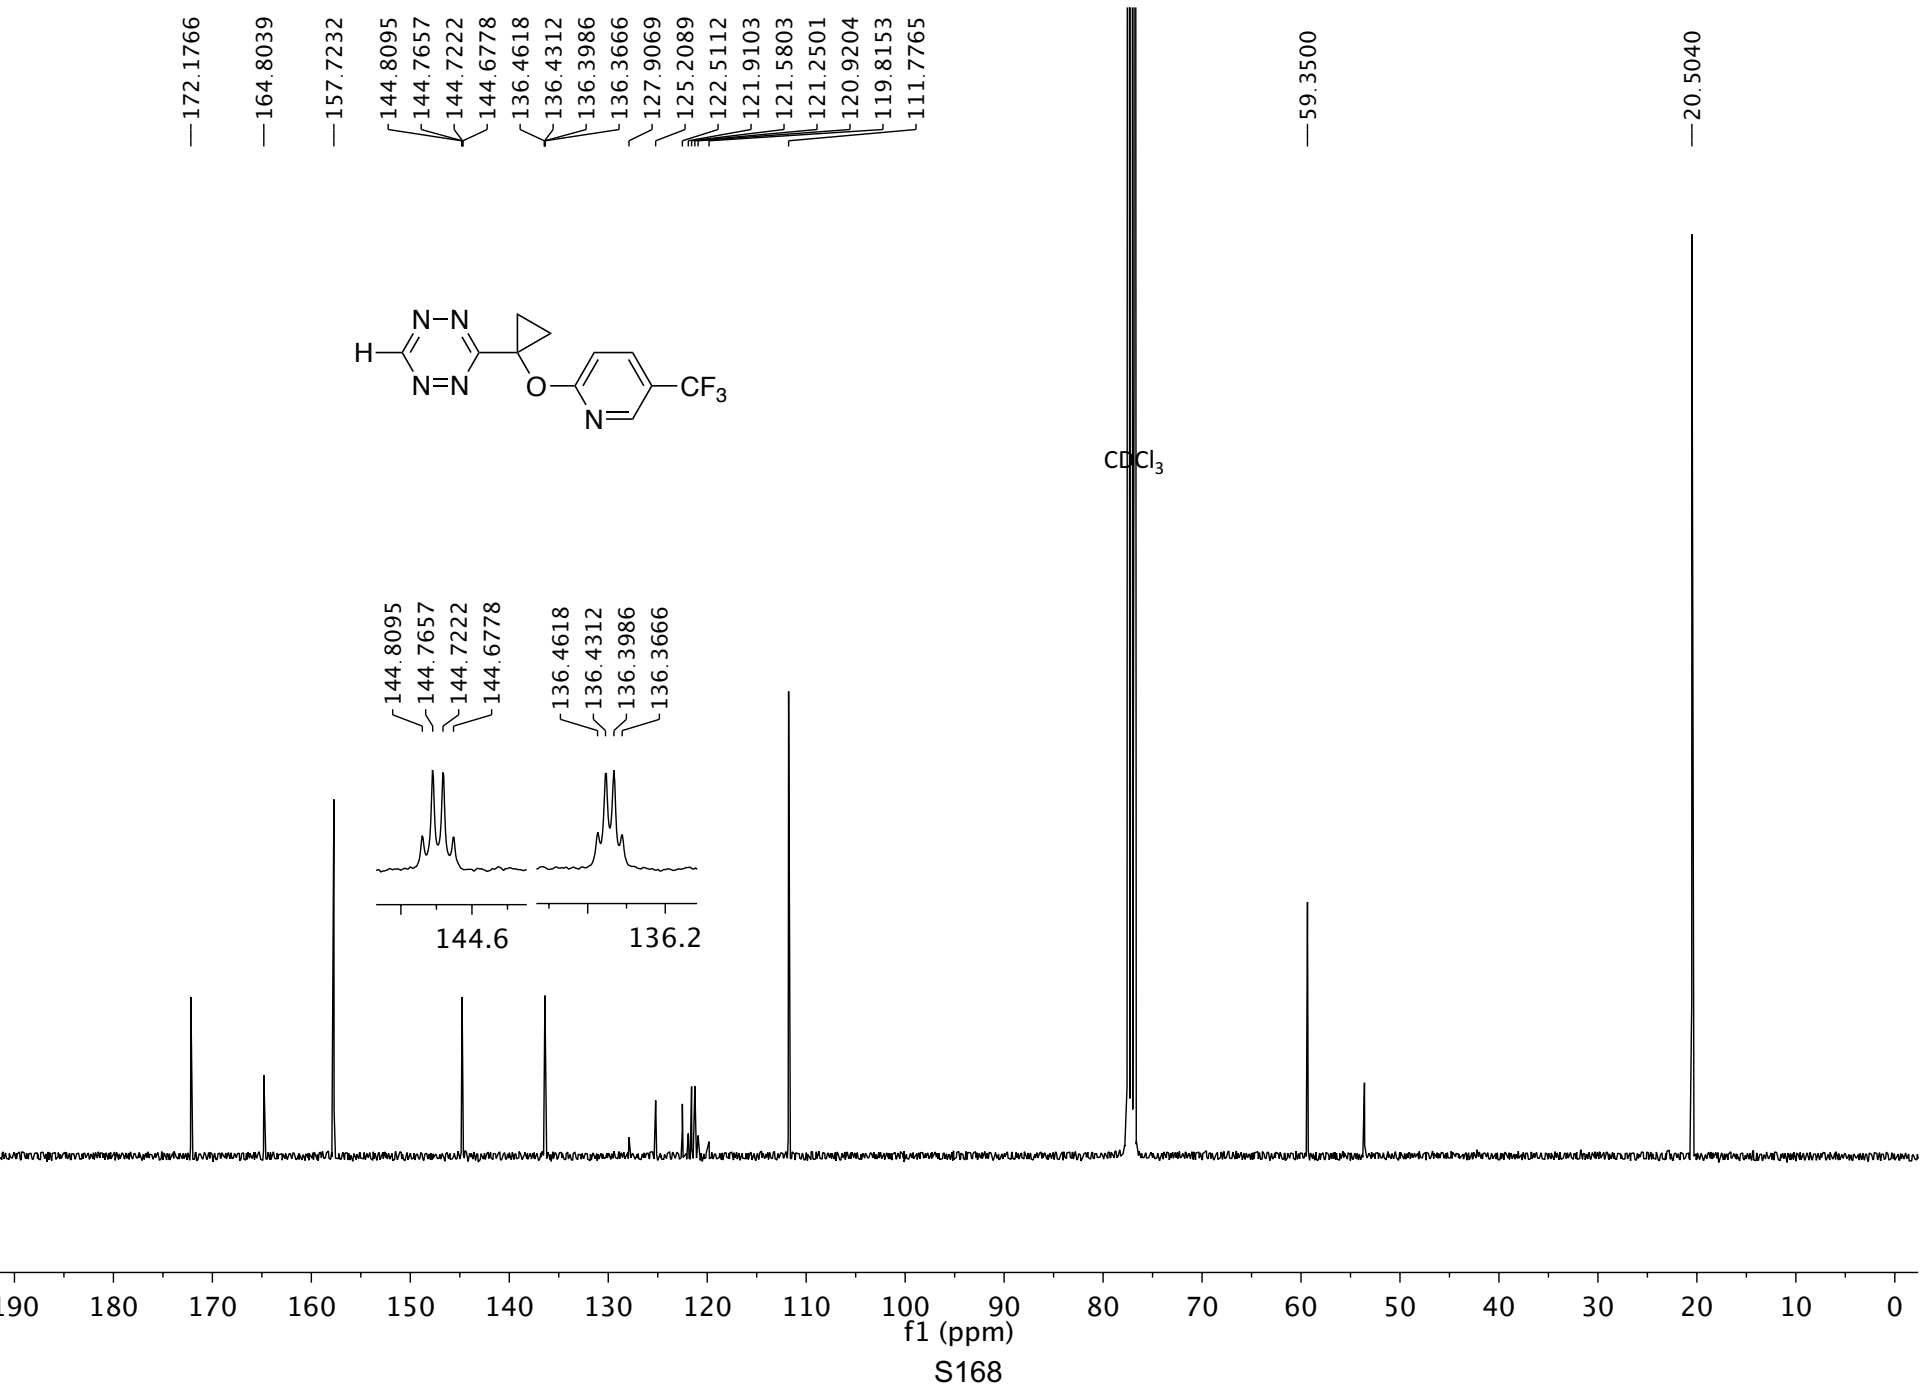



—10.2732

7.7420  
7.4953  
7.4910  
7.4863  
7.4779  
7.4738  
7.4697  
7.4607  
7.4525  
7.4484  
7.4431

—4.7726

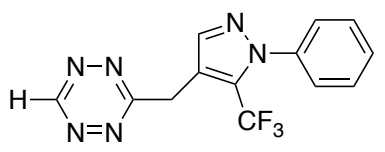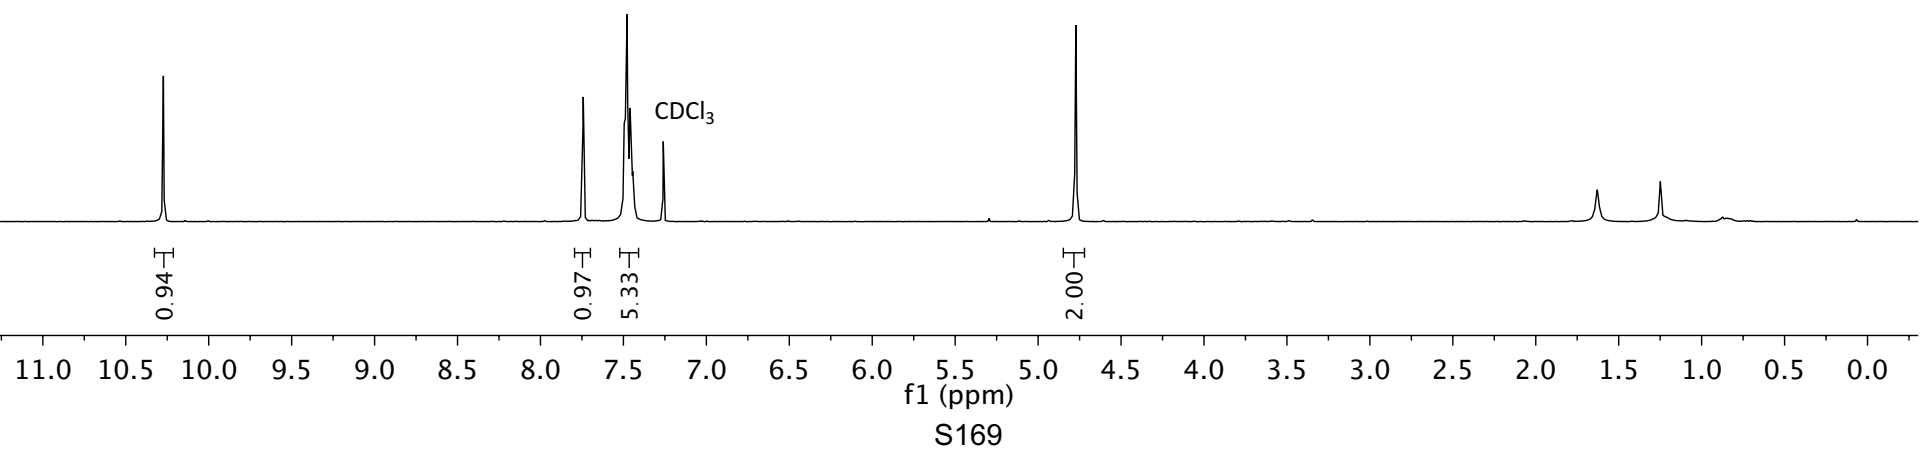

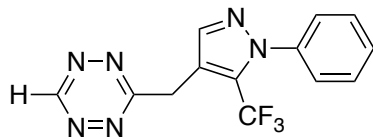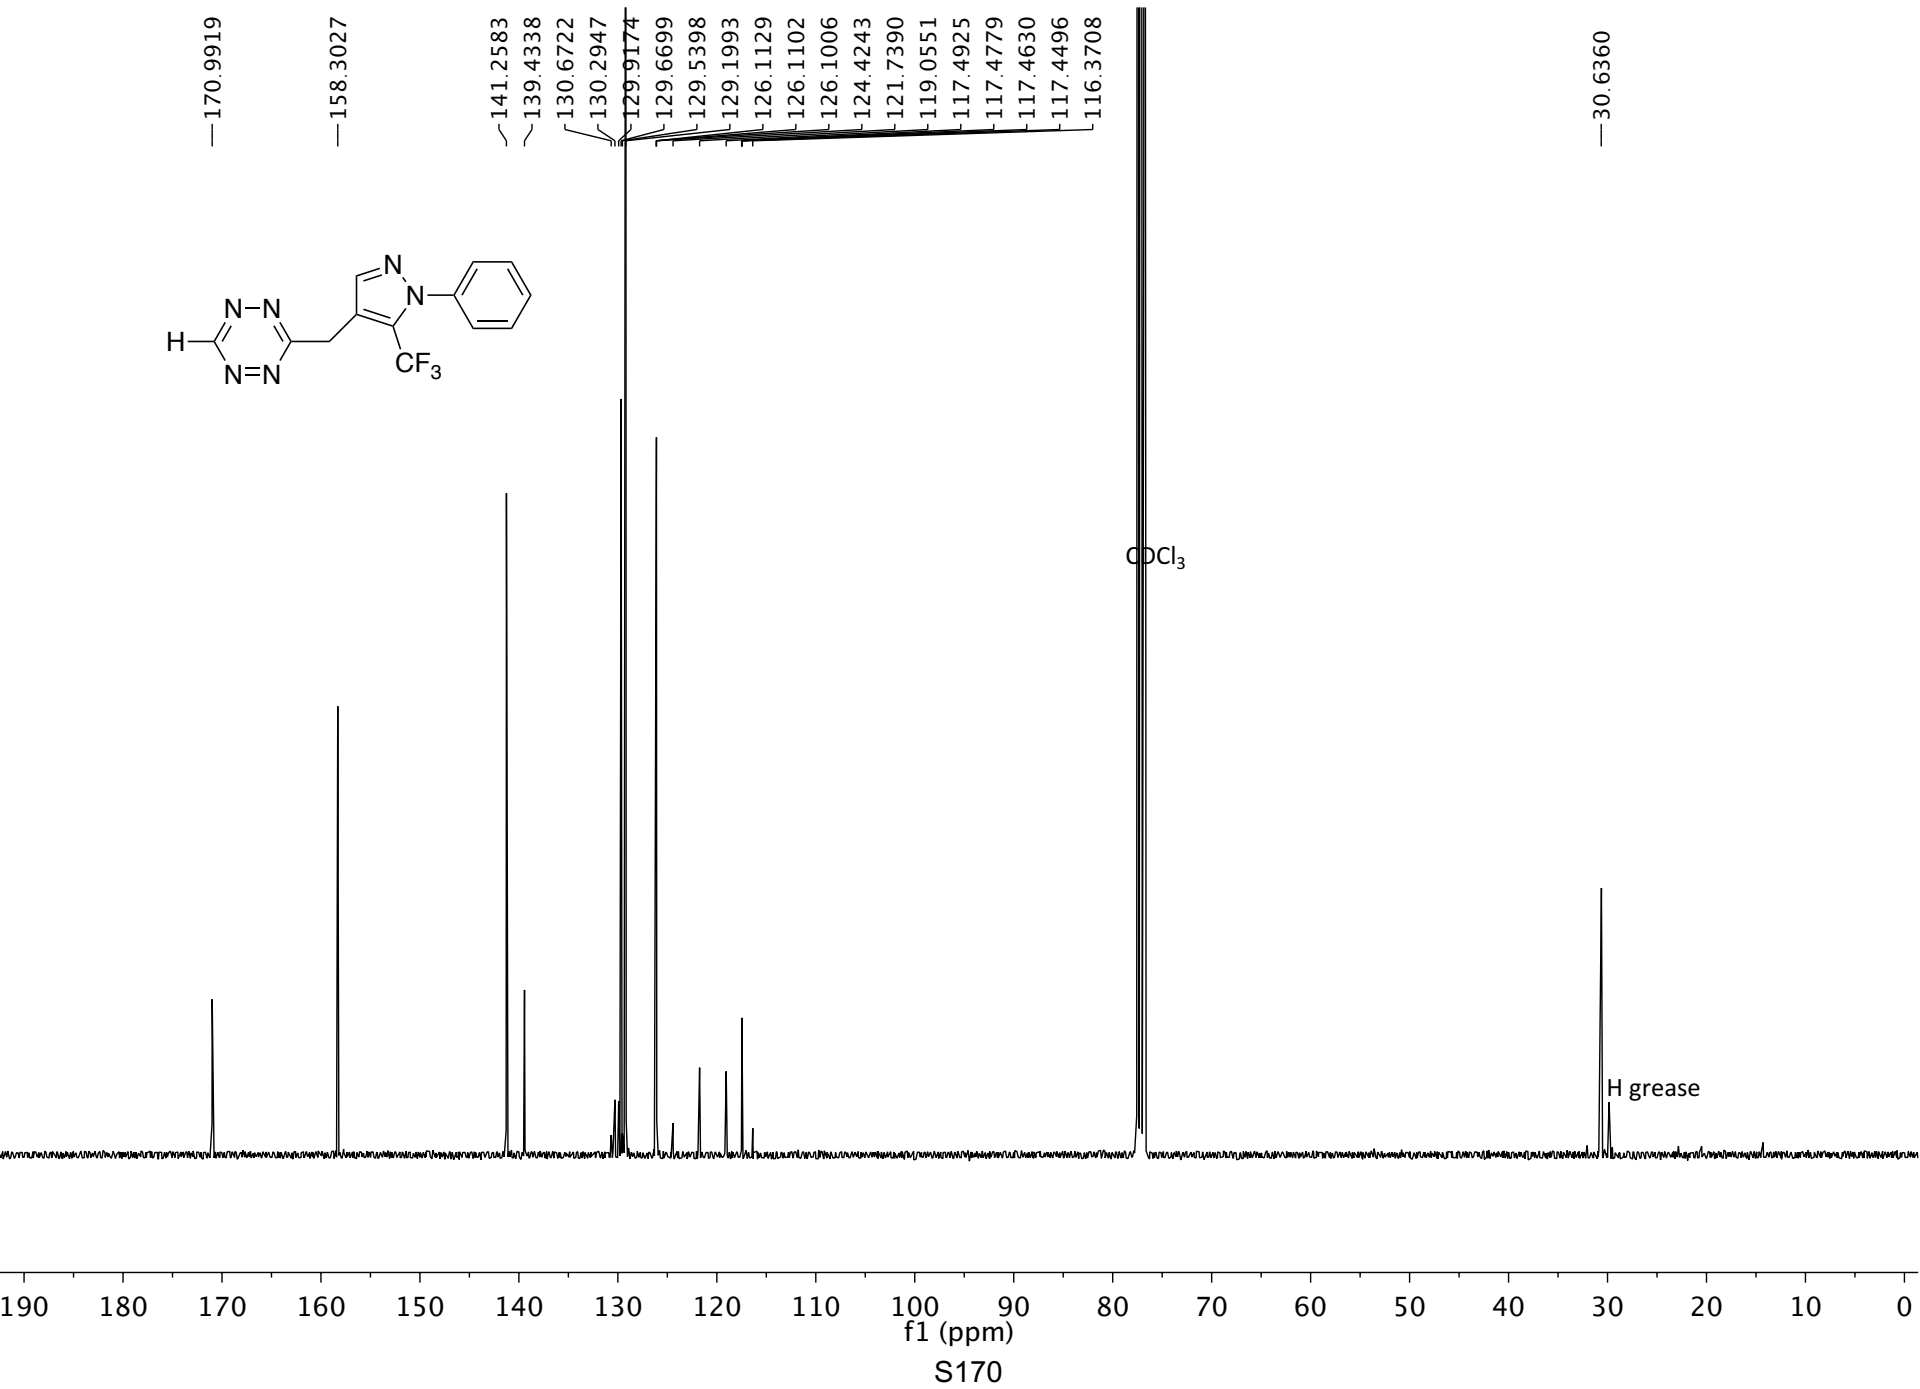

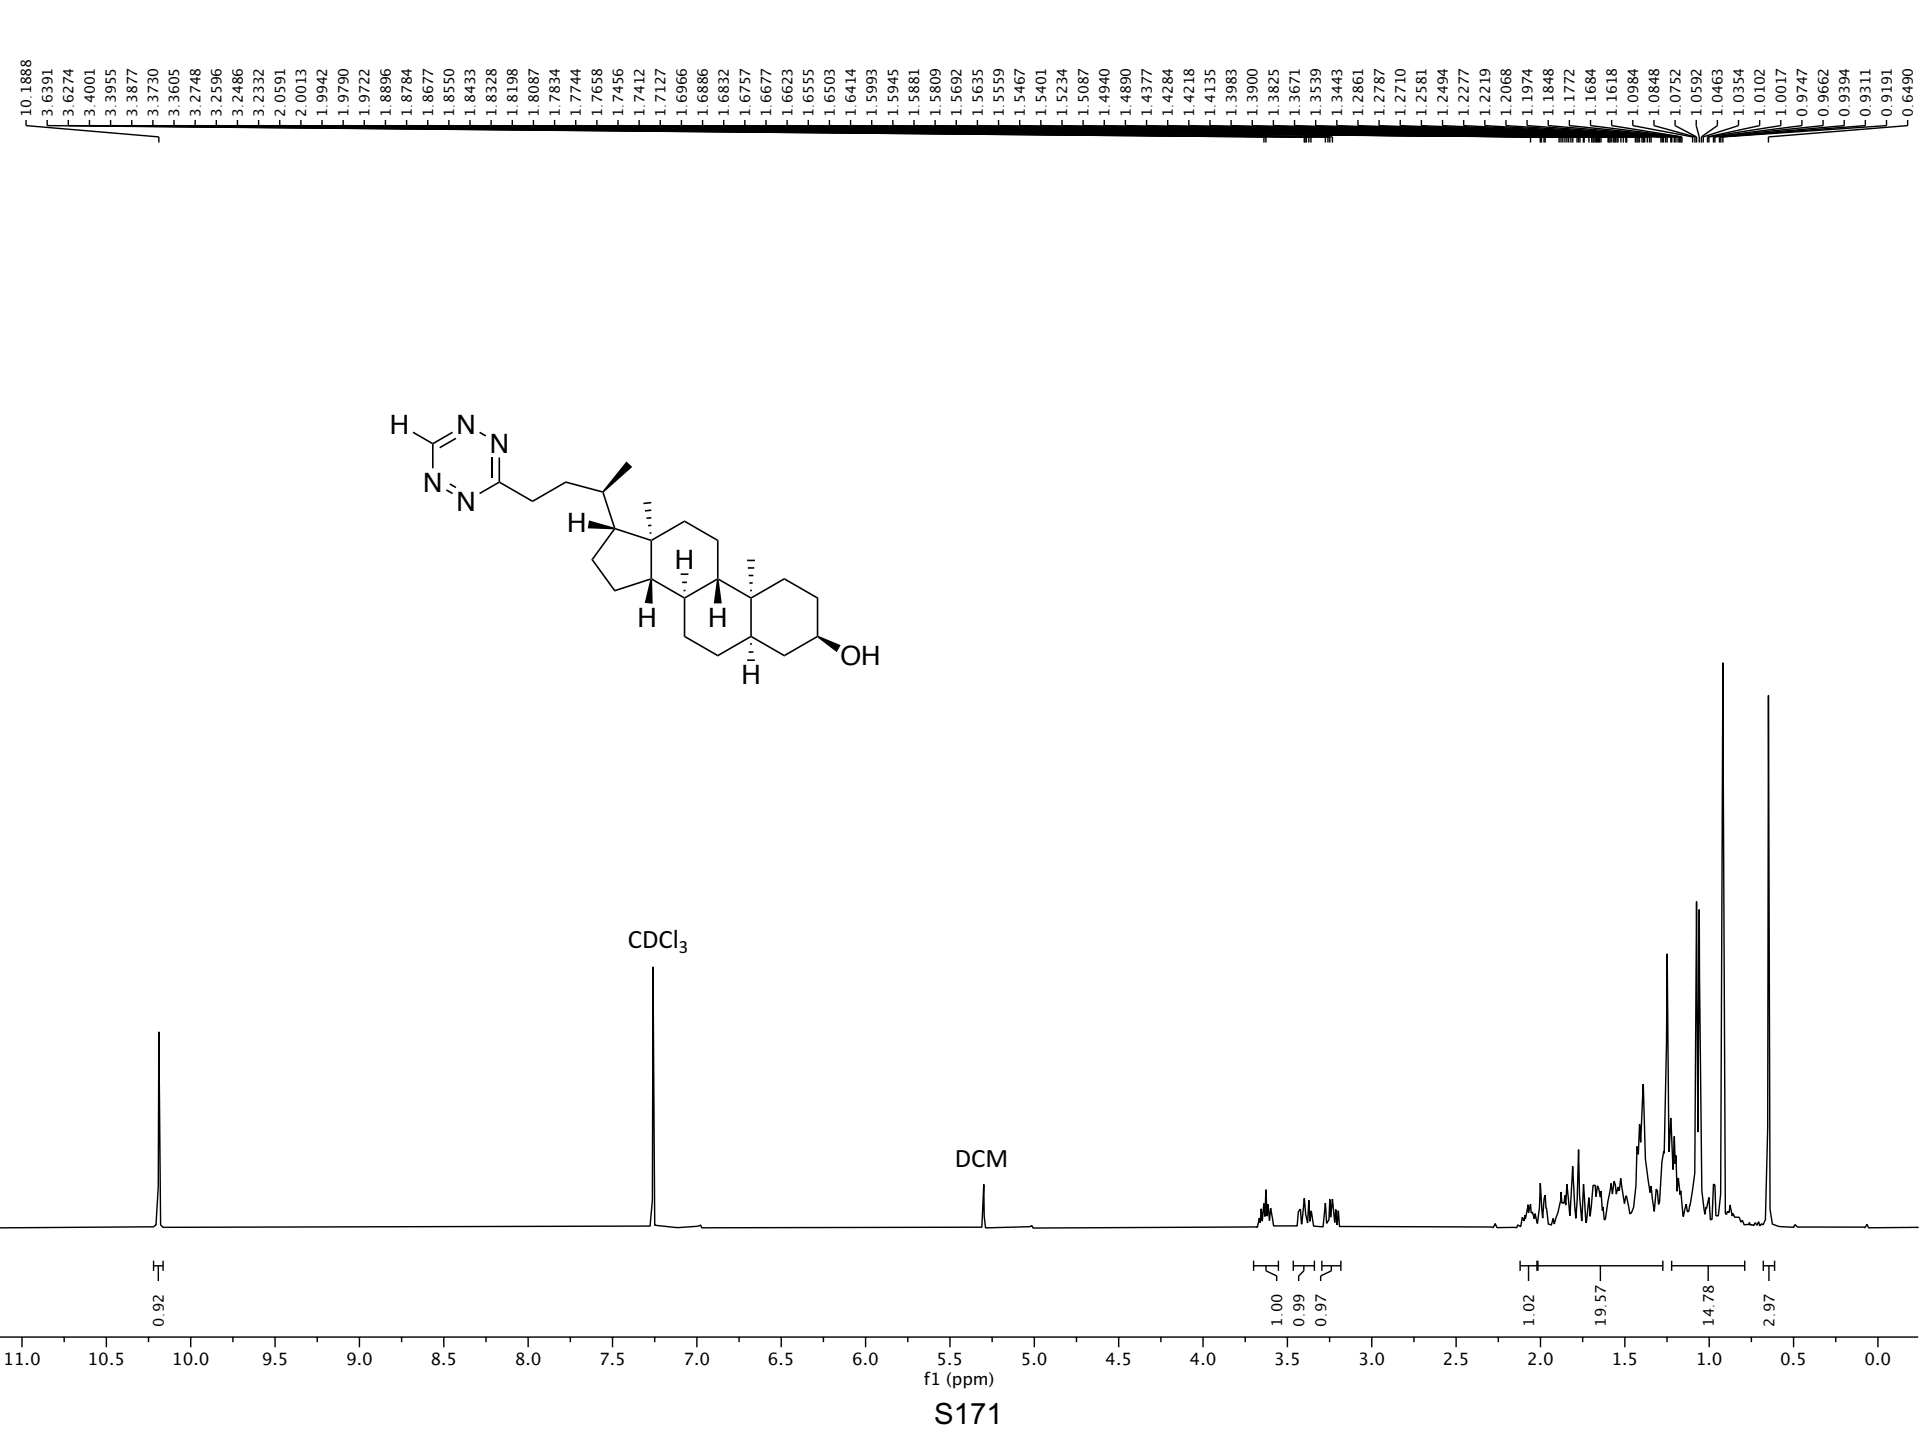

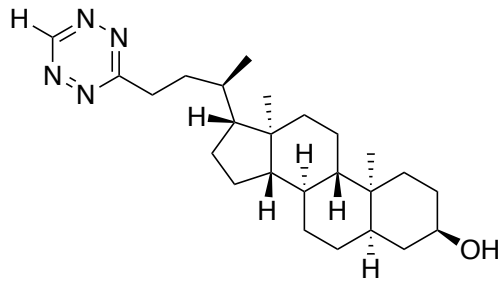

— 174.0248

— 158.0468

— 72.0068

56.6091  
55.9915  
42.9418  
42.2005  
40.5433  
40.3021  
36.5784  
35.9741  
35.8327  
35.4693  
35.0008  
34.7082  
32.4621  
30.6845  
29.8576  
28.4032  
27.3129  
26.5418  
24.3350  
23.5194  
20.9636  
18.6288  
12.2135

CDCl<sub>3</sub>

210 200 190 180 170 160 150 140 130 120 110 100 90 80 70 60 50 40 30 20 10 0 -10

f1 (ppm)

S172

—10.1985

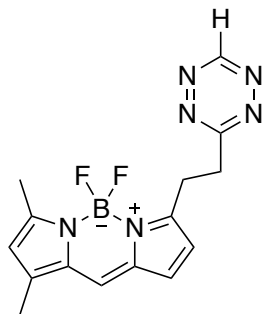

7.0872

6.8689

6.8588

6.2410

6.2310

6.1212

3.8411

3.8232

3.8189

3.8031

3.6728

3.6570

3.6529

3.6348

—2.5508

—2.2507

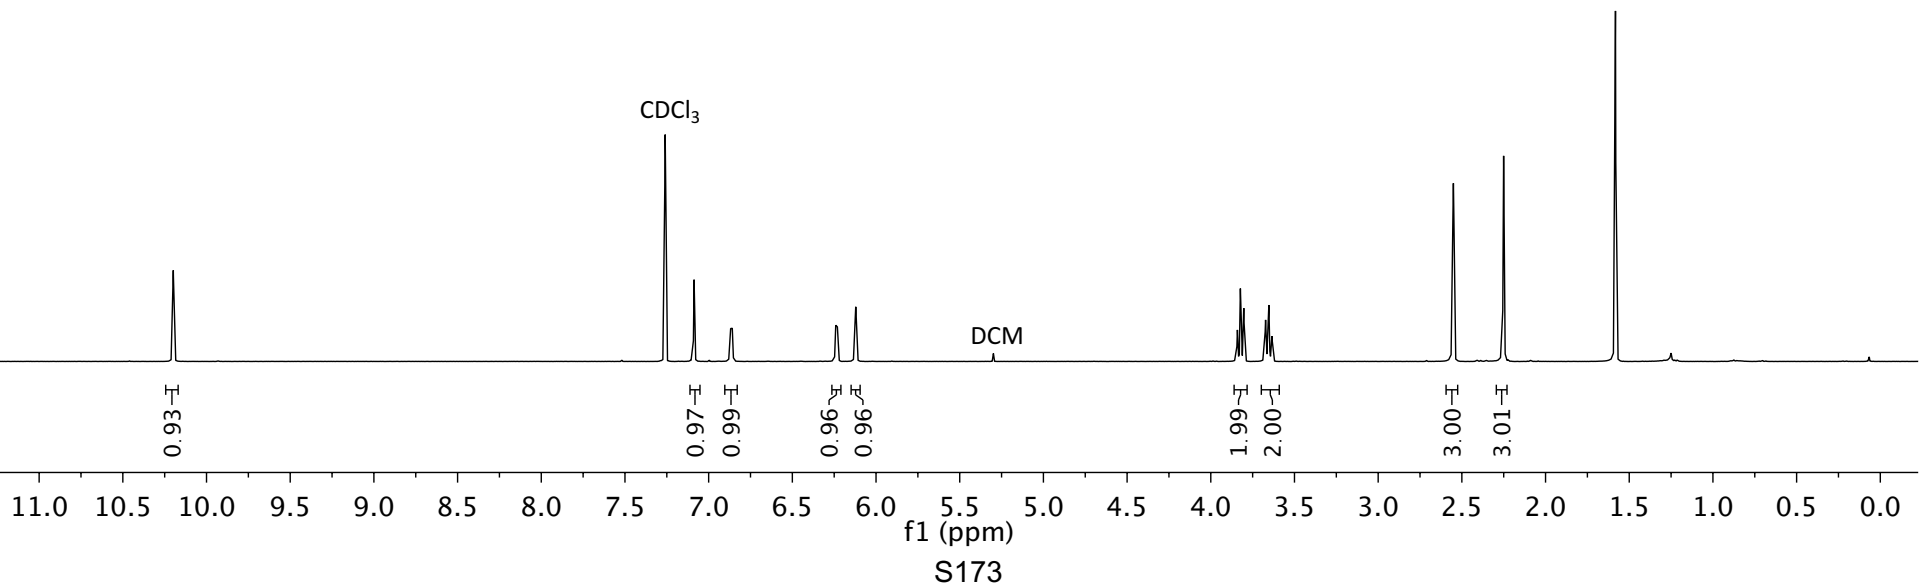

S173

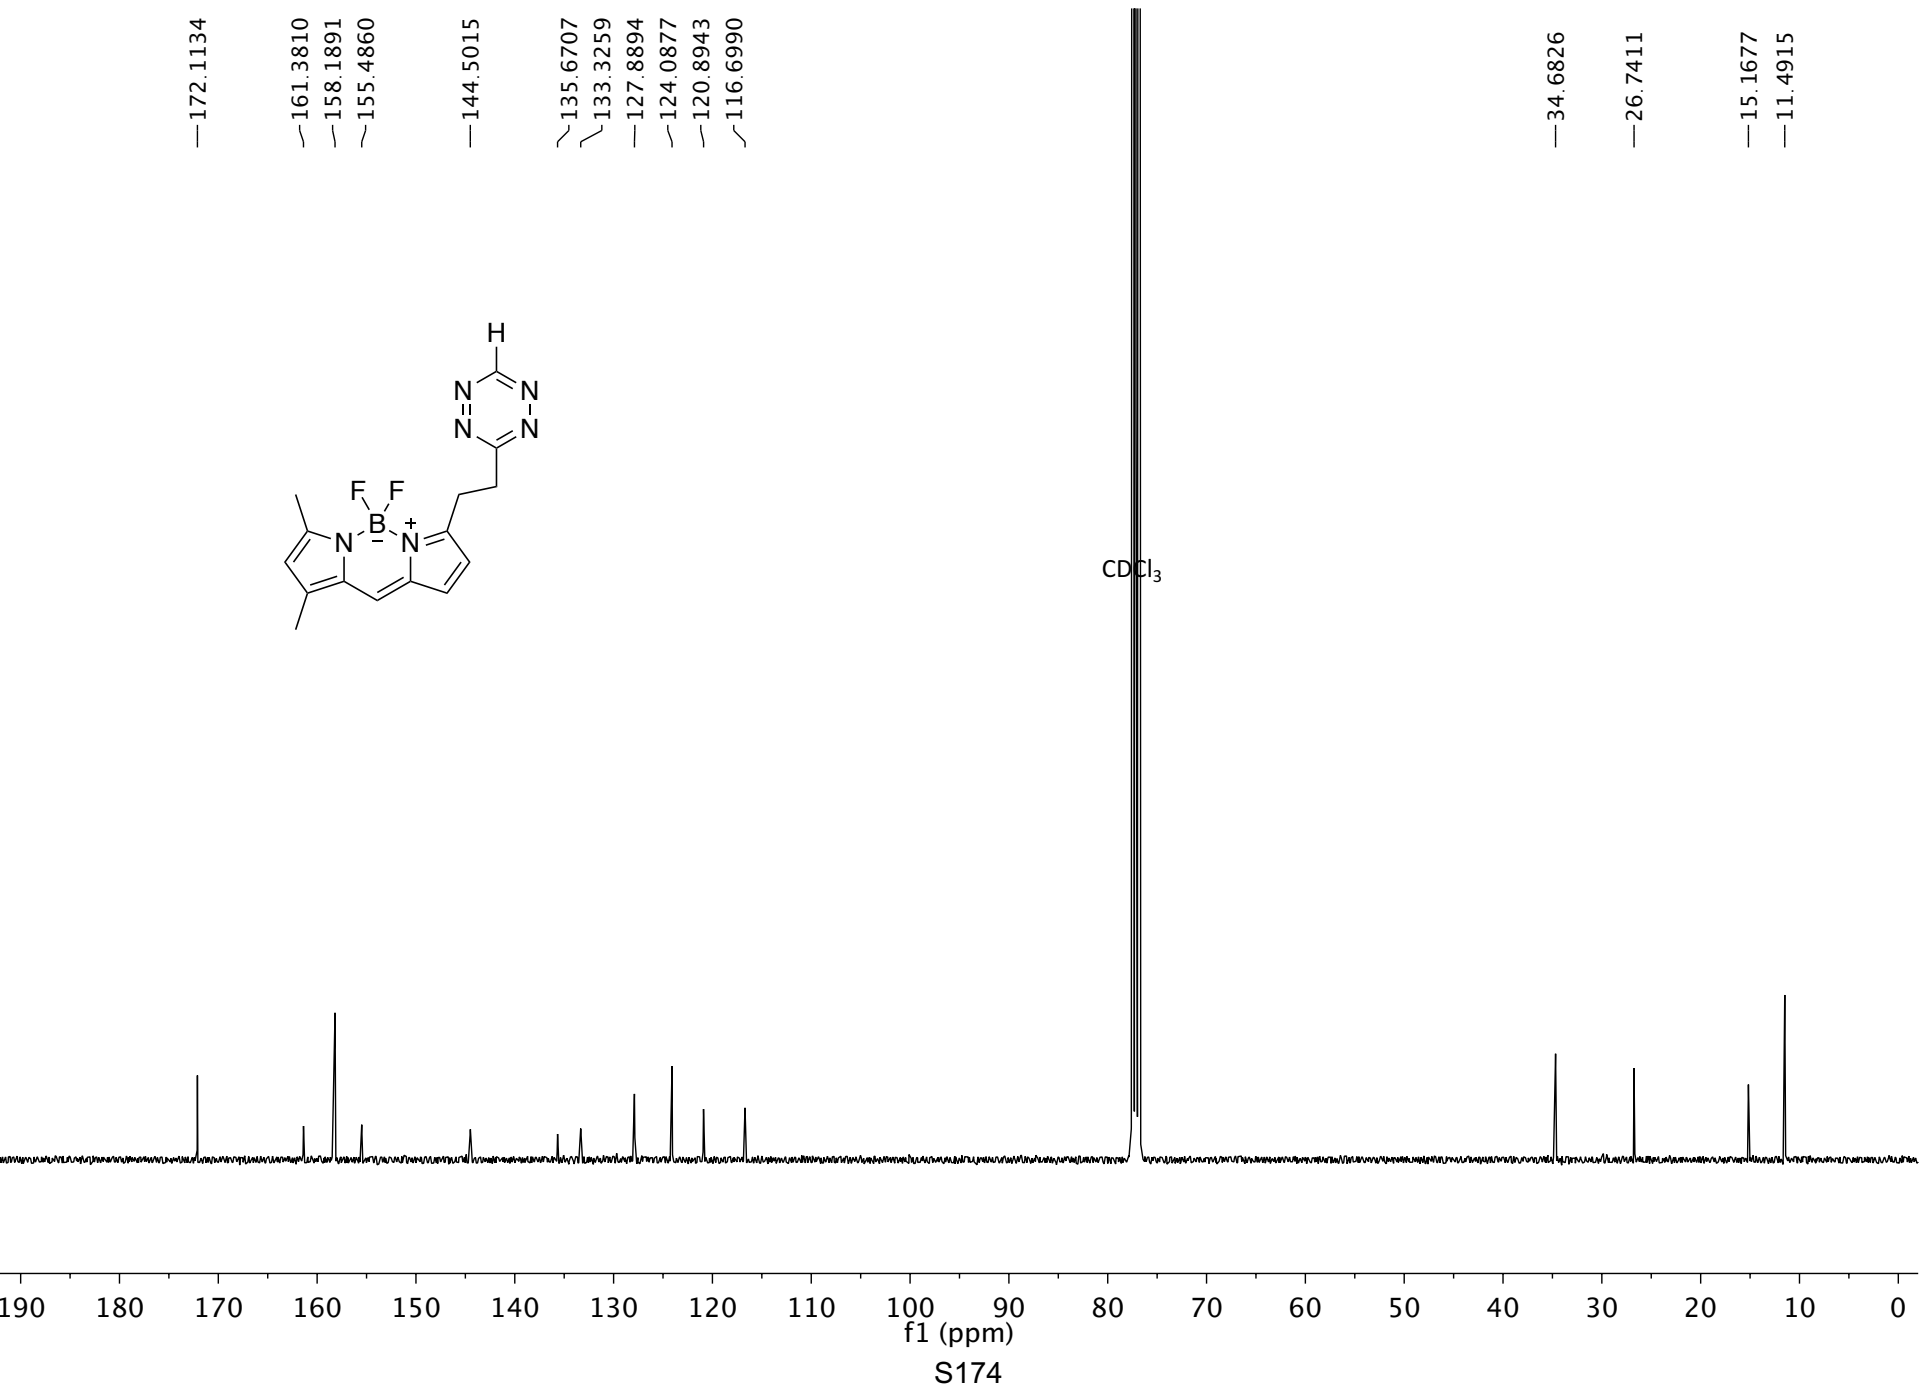

8.5701  
8.5478

7.1019  
7.0793

5.5746

4.9949  
4.9801

3.9231

1.4696

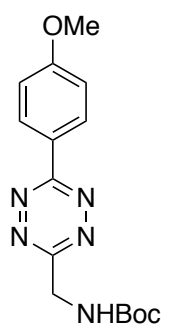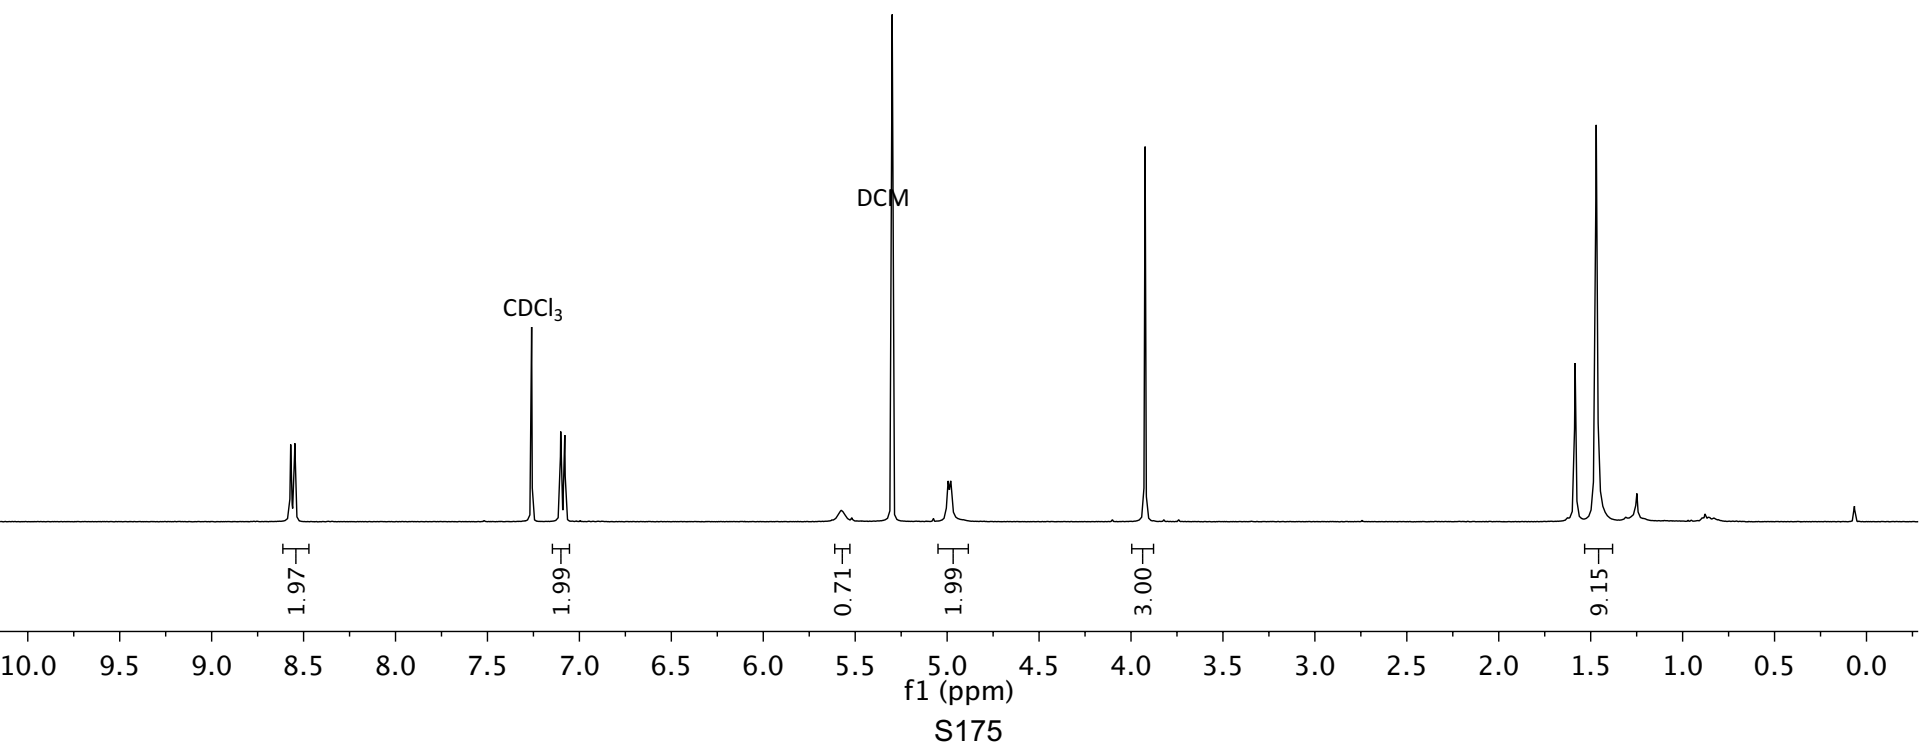

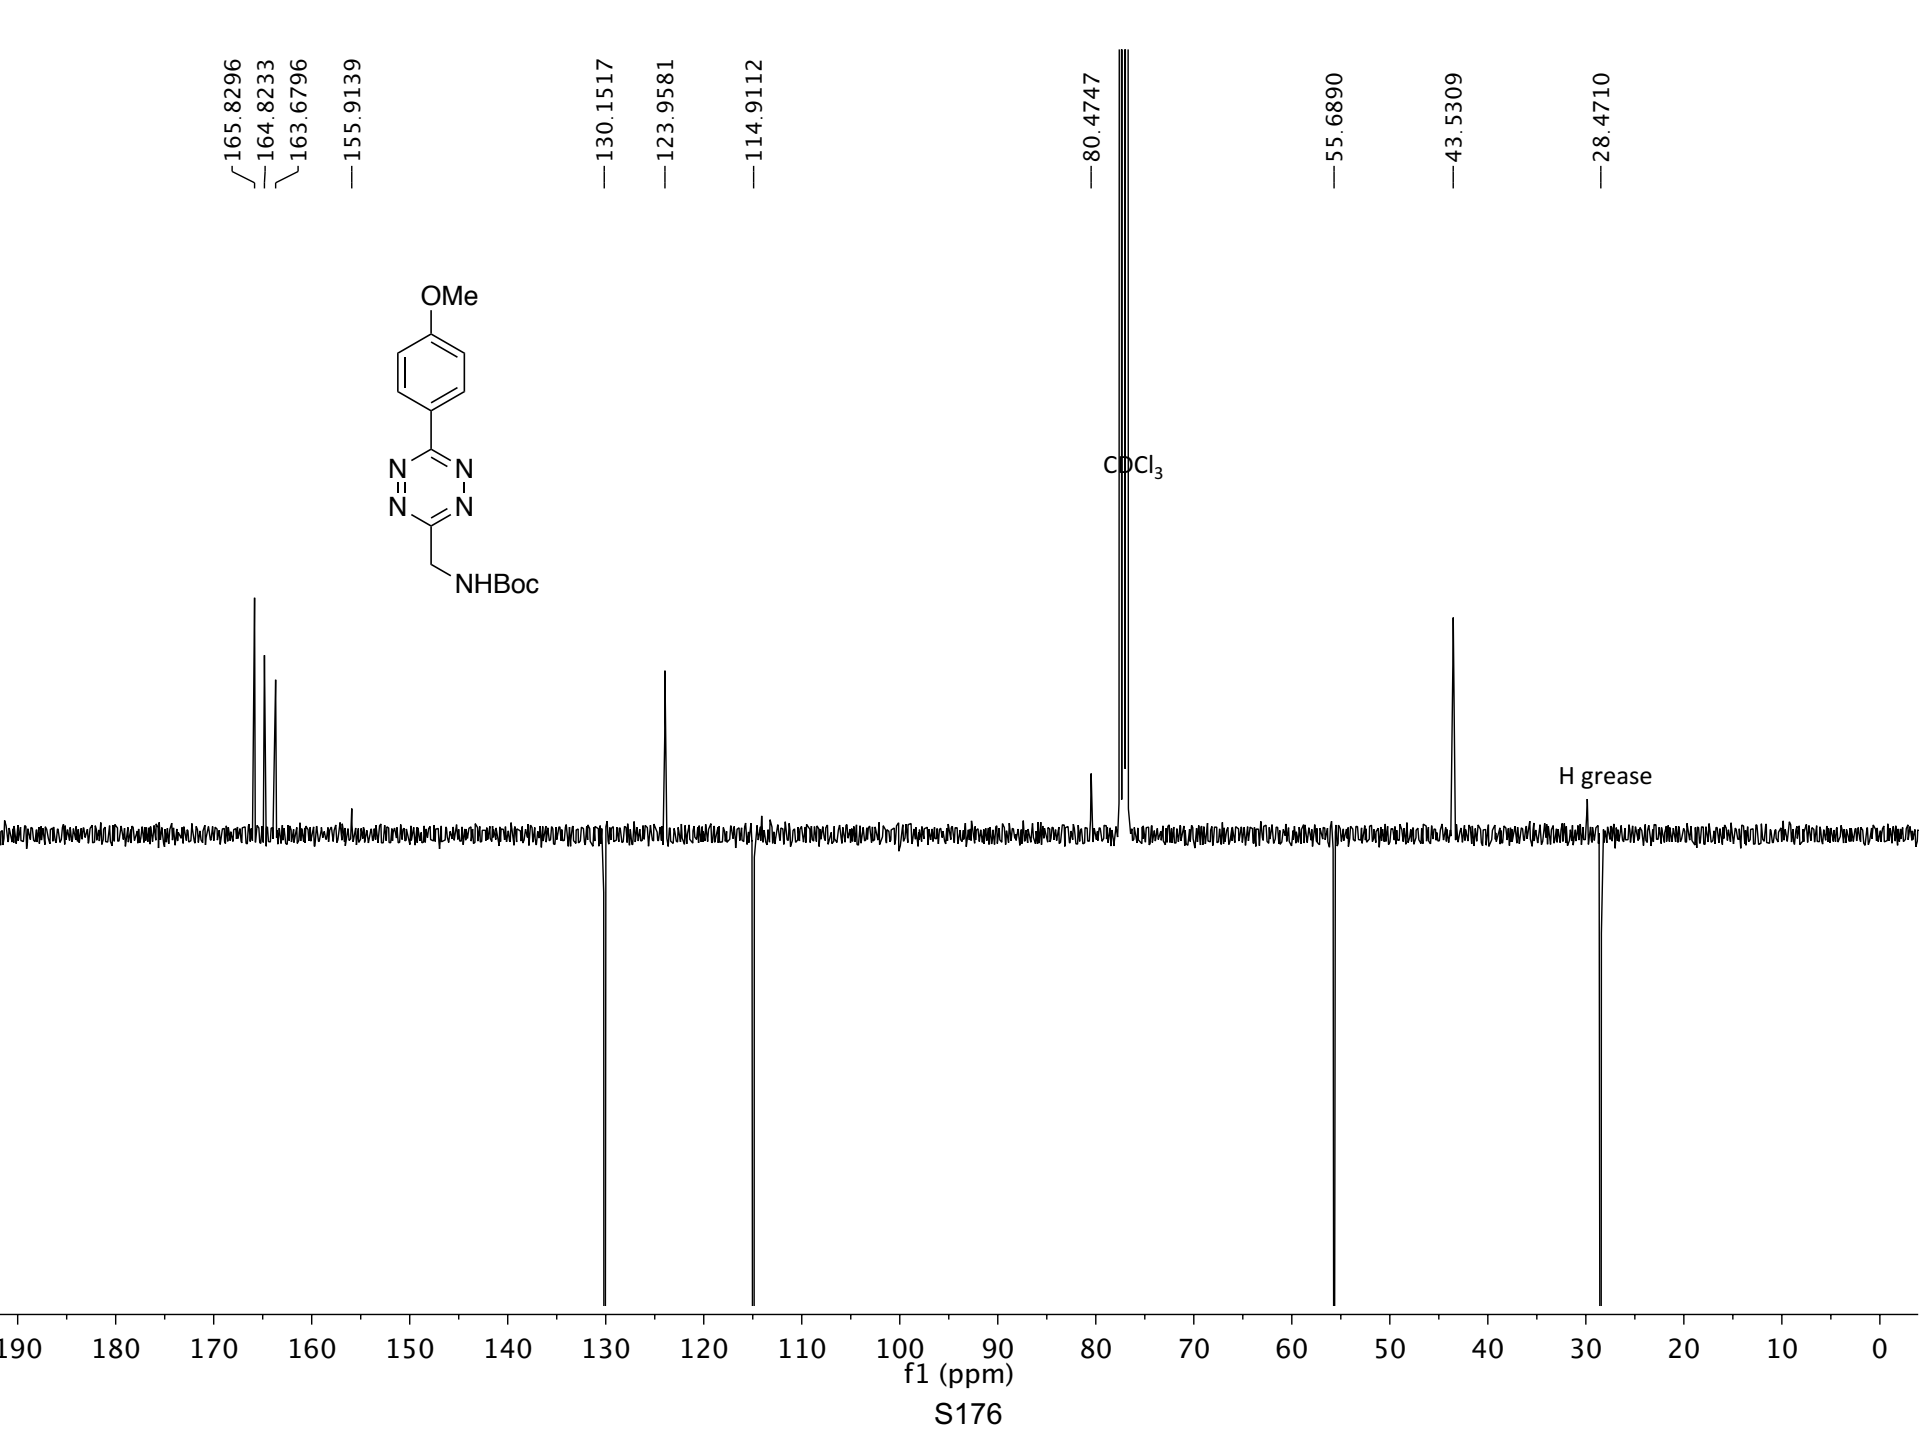



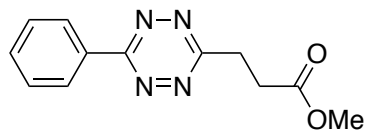

8.6085  
8.6046  
8.6006  
8.5887  
8.5840  
7.6564  
7.6528  
7.6489  
7.6451  
7.6350  
7.6276  
7.6218  
7.6177  
7.6120  
7.6080  
7.5980  
7.5927  
7.5803  
7.5761  
7.5707

3.7281  
3.7115  
3.6928

3.1340  
3.1163  
3.0986

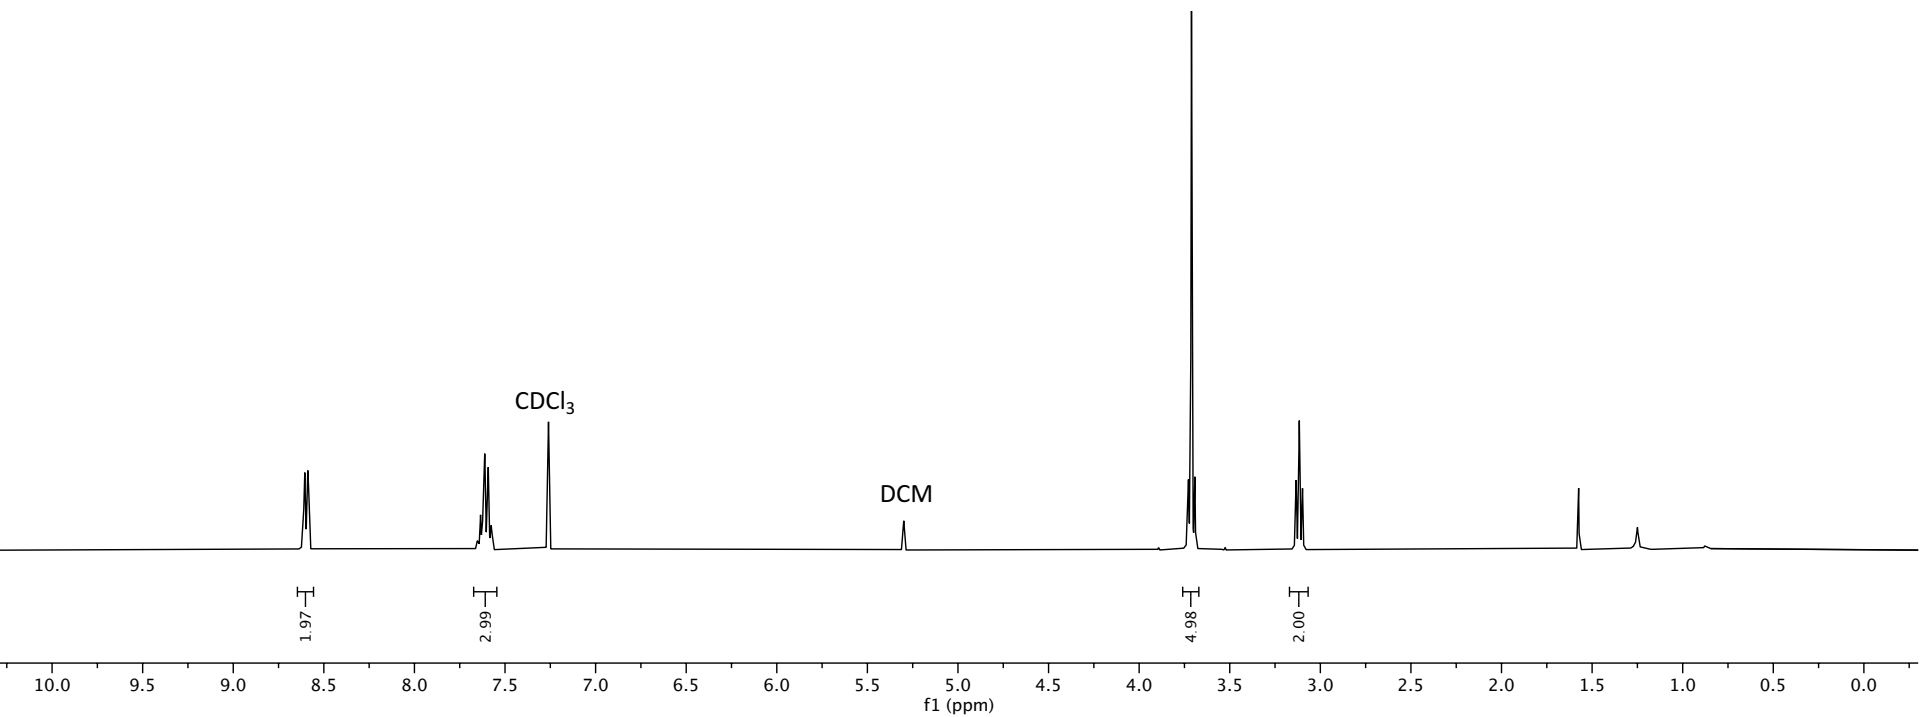

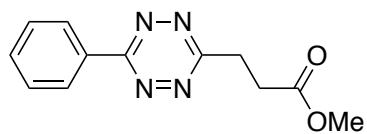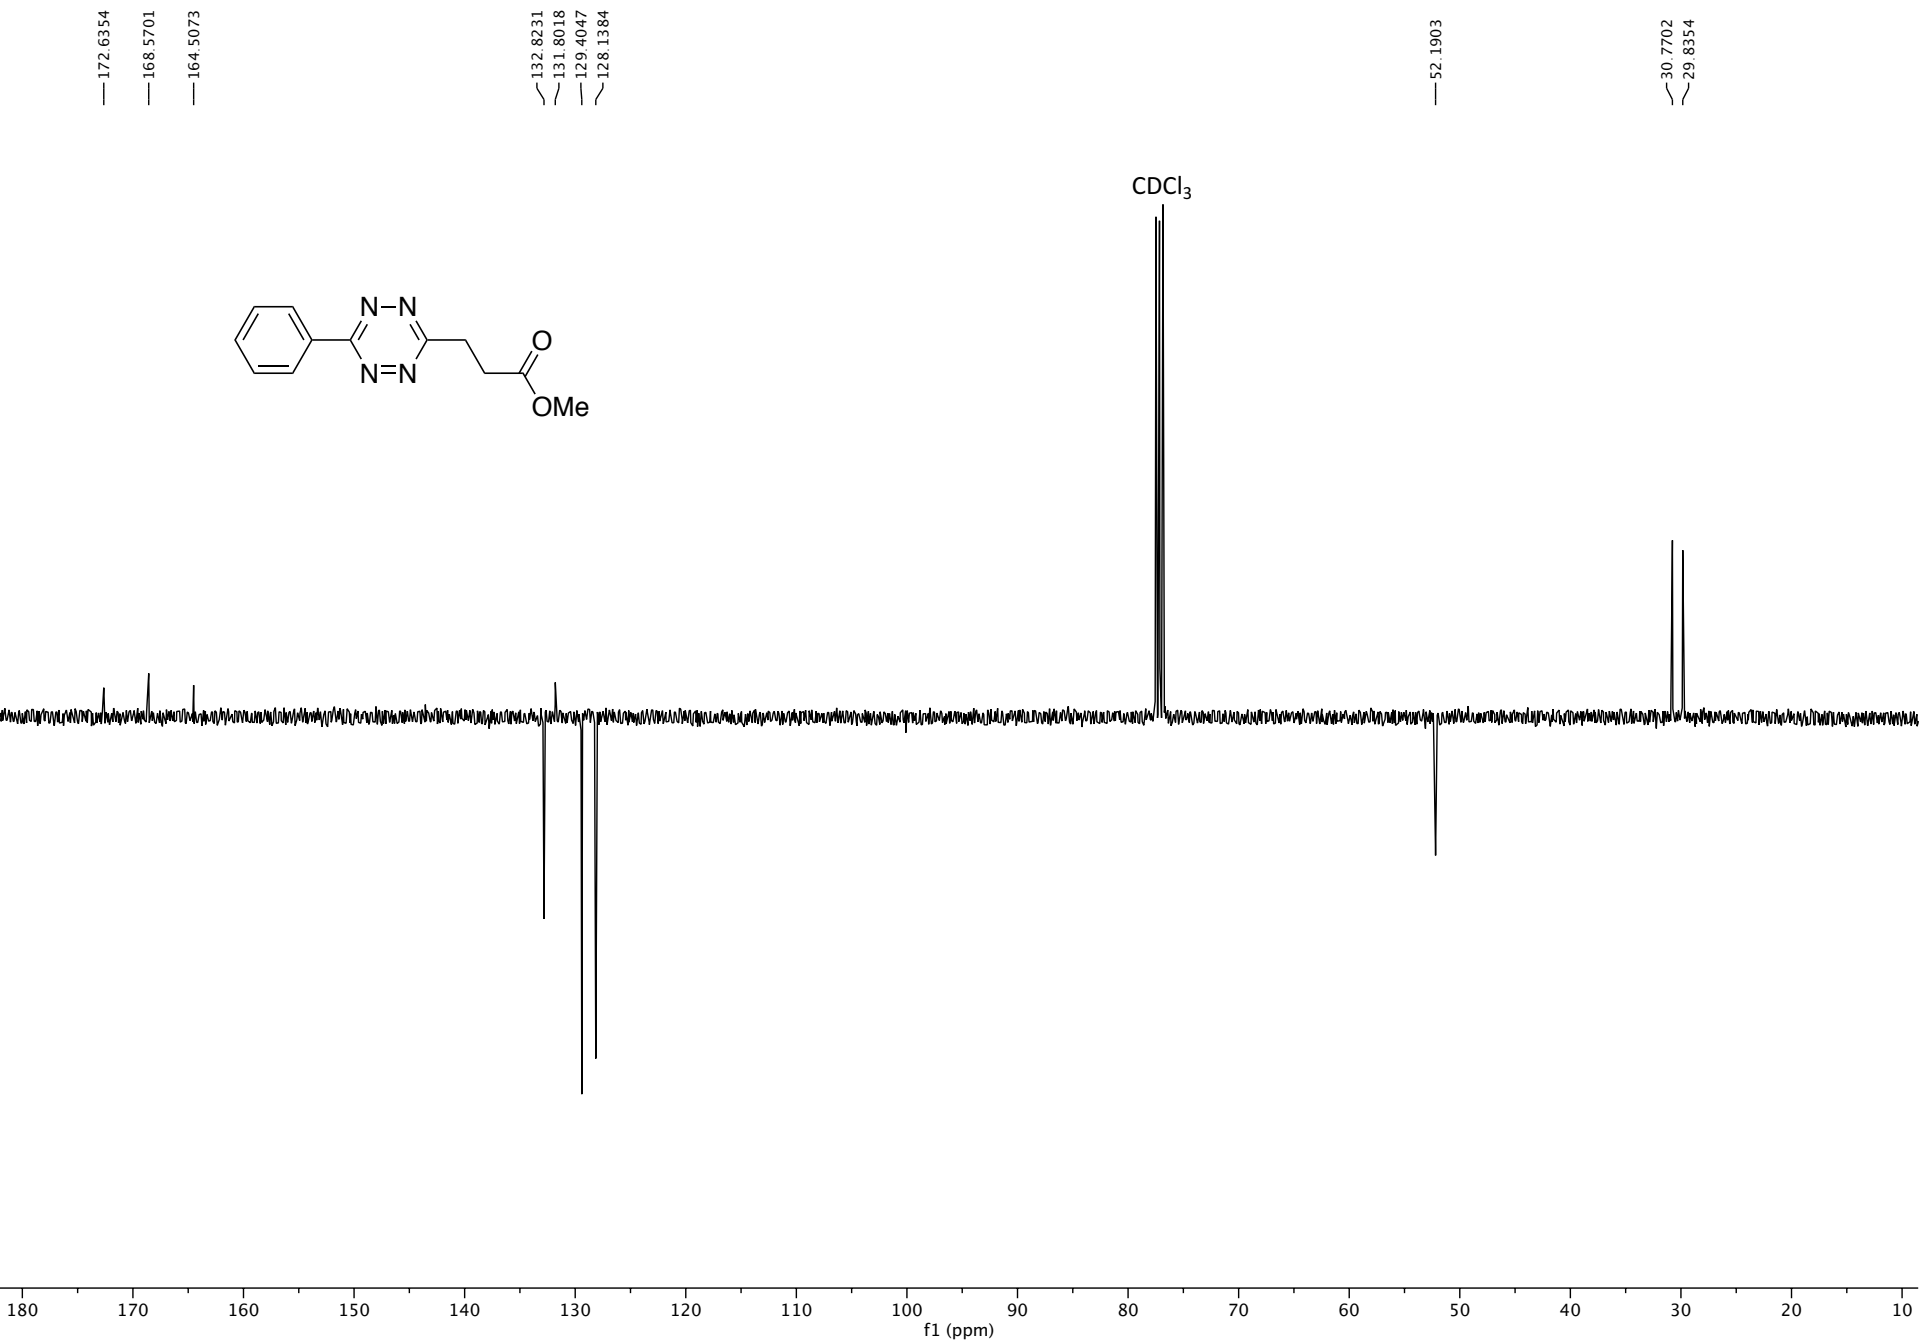

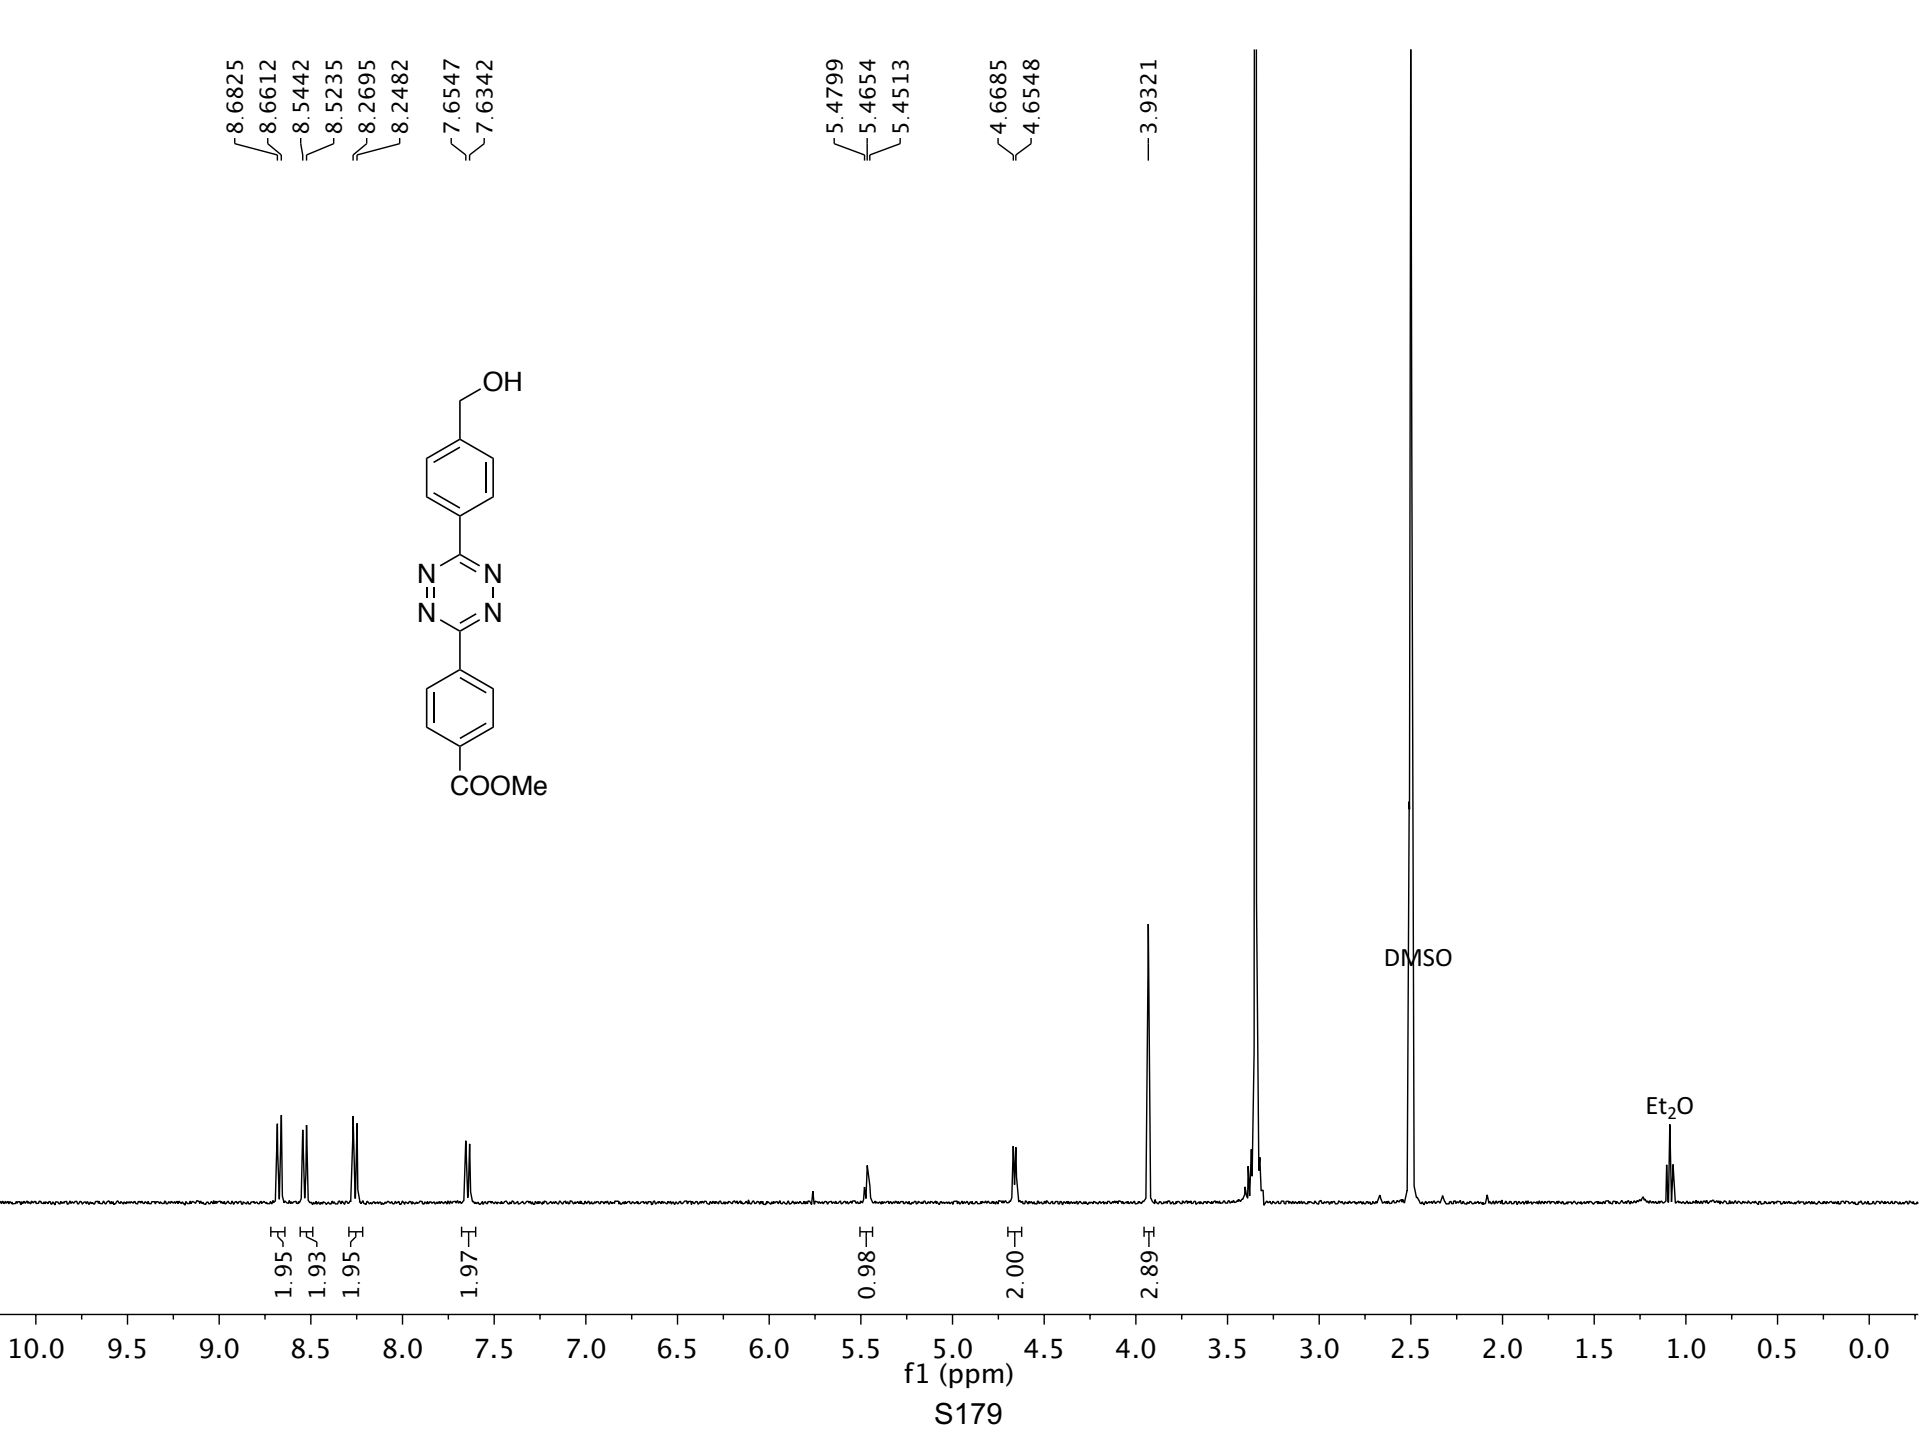

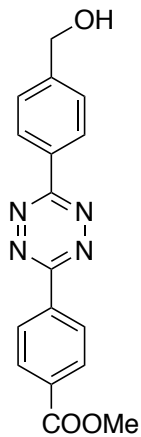

165.7309  
163.3681  
162.7938  
147.9825  
136.1918  
132.7515  
130.1852  
130.0378  
127.8452  
127.6660  
127.2235

62.4886  
52.6020

DMSO

210 200 190 180 170 160 150 140 130 120 110 100 90 80 70 60 50 40 30 20 10 0 -10  
f1 (ppm)

S180

8.6819  
8.6606  
8.5307  
8.5104  
8.2694  
8.2481  
7.5910  
7.5755  
7.5629  
7.5428

4.2820  
4.2664  
3.9320

1.4173

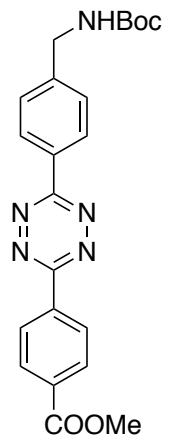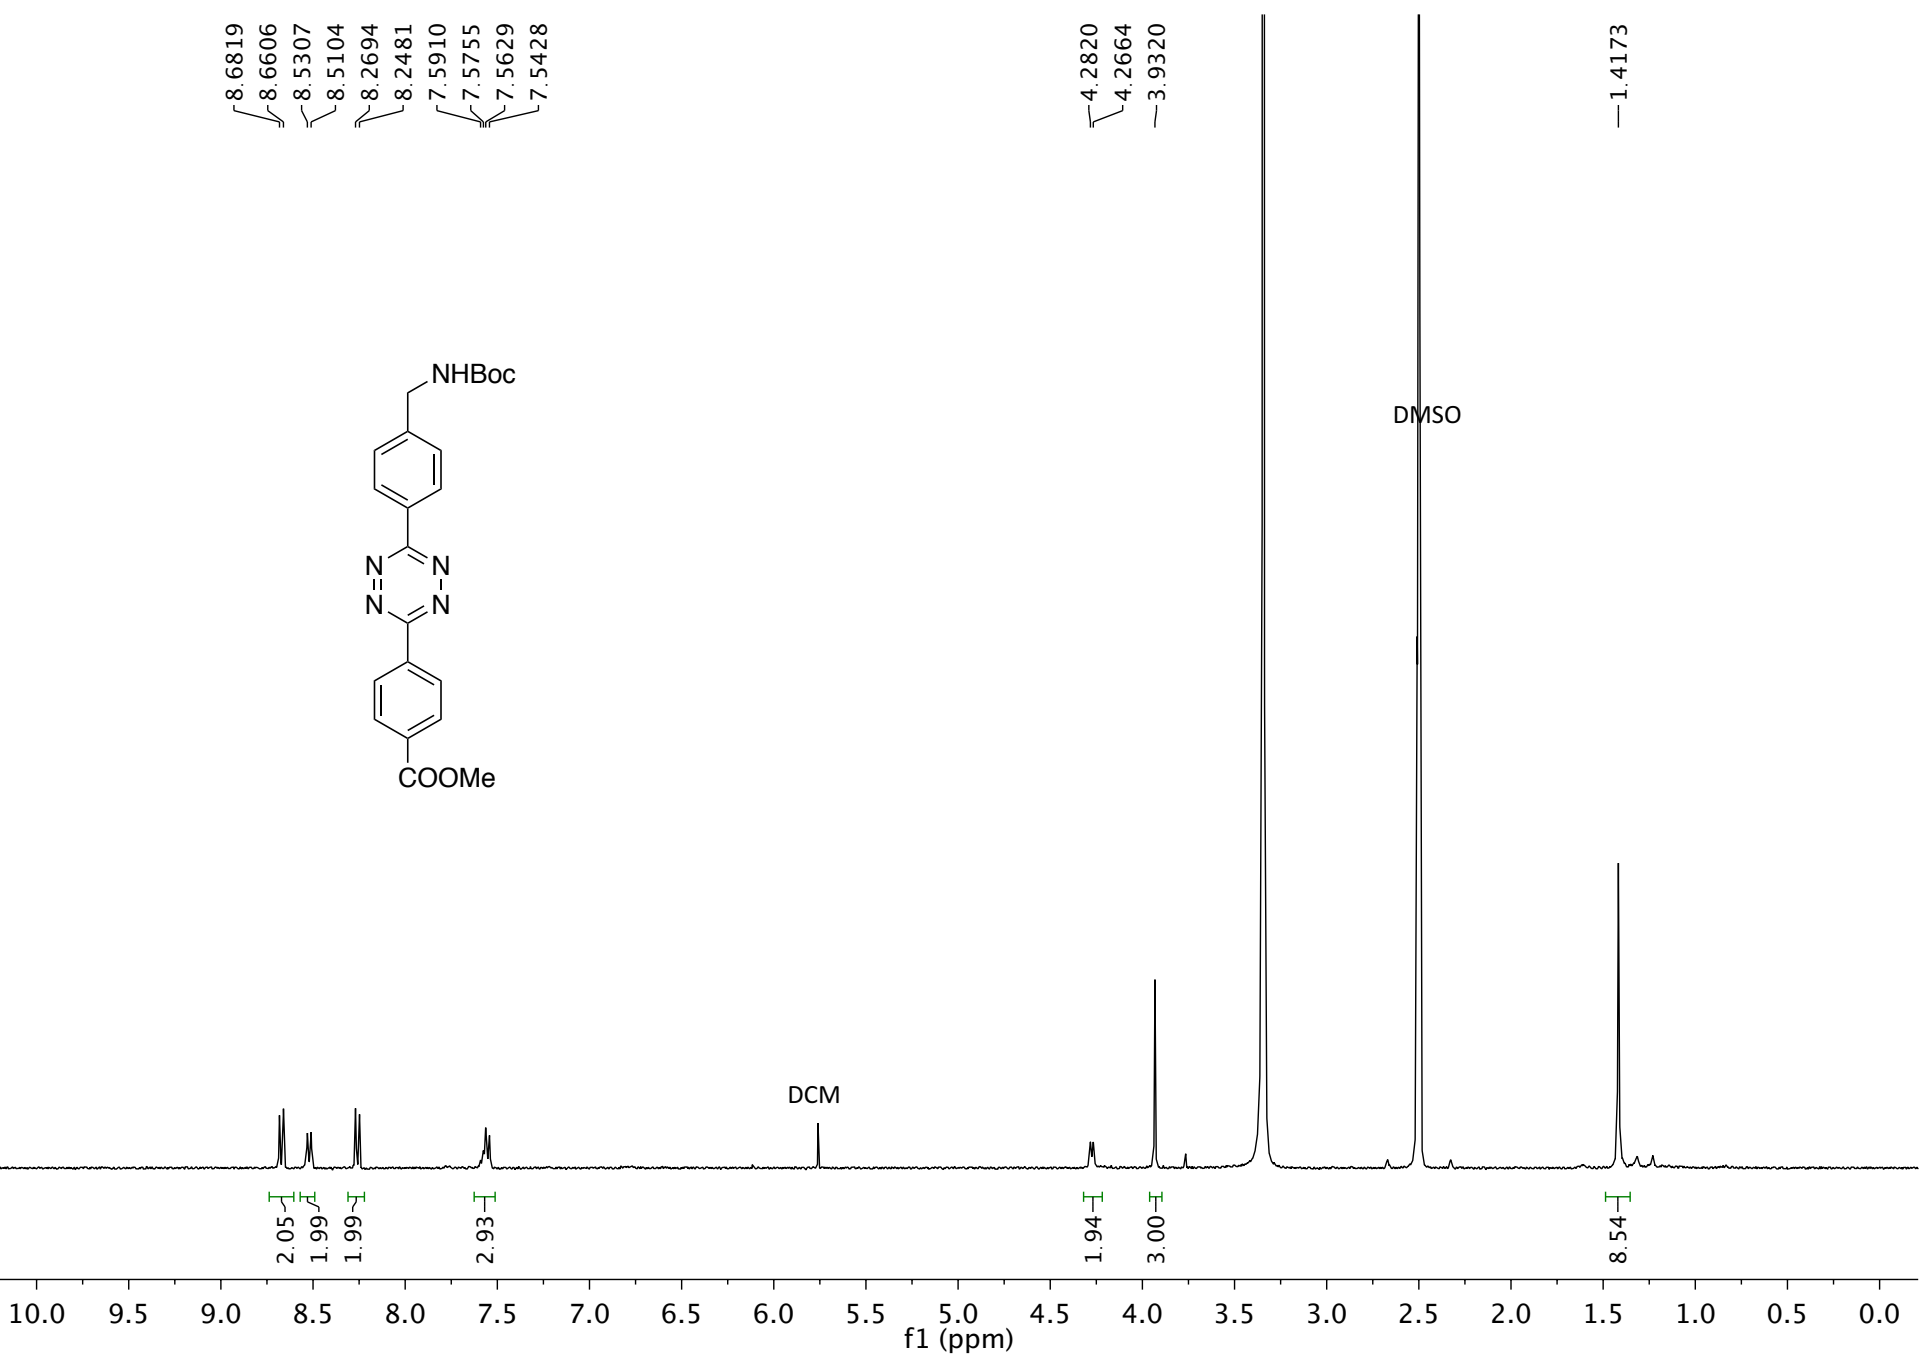

S181

165.7229  
163.3167  
162.7983  
145.5146  
136.1749  
132.7631  
130.1779  
130.1519  
127.9286  
127.8488  
127.7559

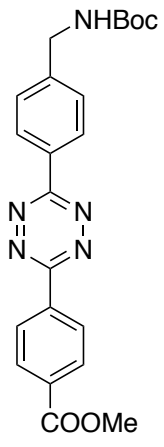

78.0578

52.5906

43.3011

28.2815

DMSO

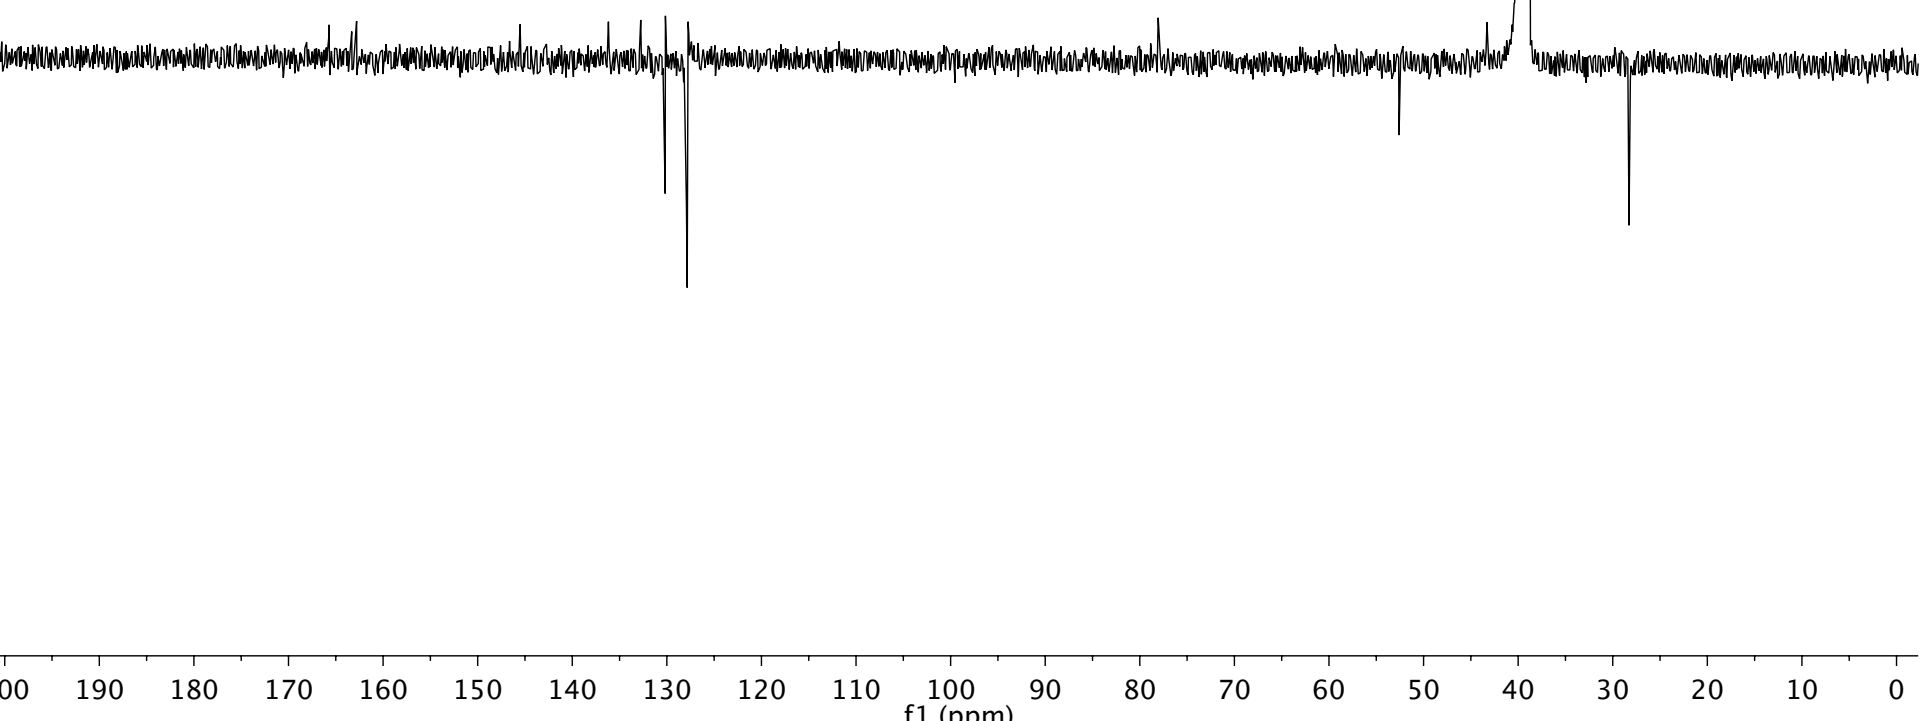

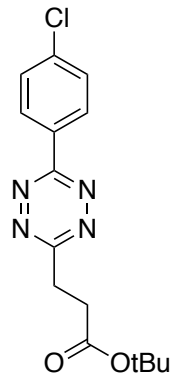

8.5620  
8.5403

7.5840  
7.5623

3.6650  
3.6474  
3.6296

3.0325  
3.0147  
2.9971

1.4174

CDCl<sub>3</sub>

1.99

2.00

1.98

2.00

9.77

f1 (ppm)

S183

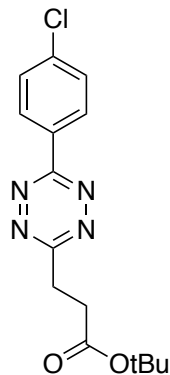

— 171.3115  
— 169.0948  
— 163.7749

— 139.3009  
— 130.3802  
— 129.7650  
— 129.3723

— 81.3016  
CDCl<sub>3</sub>

— 32.3280  
— 30.1466  
— 28.1819

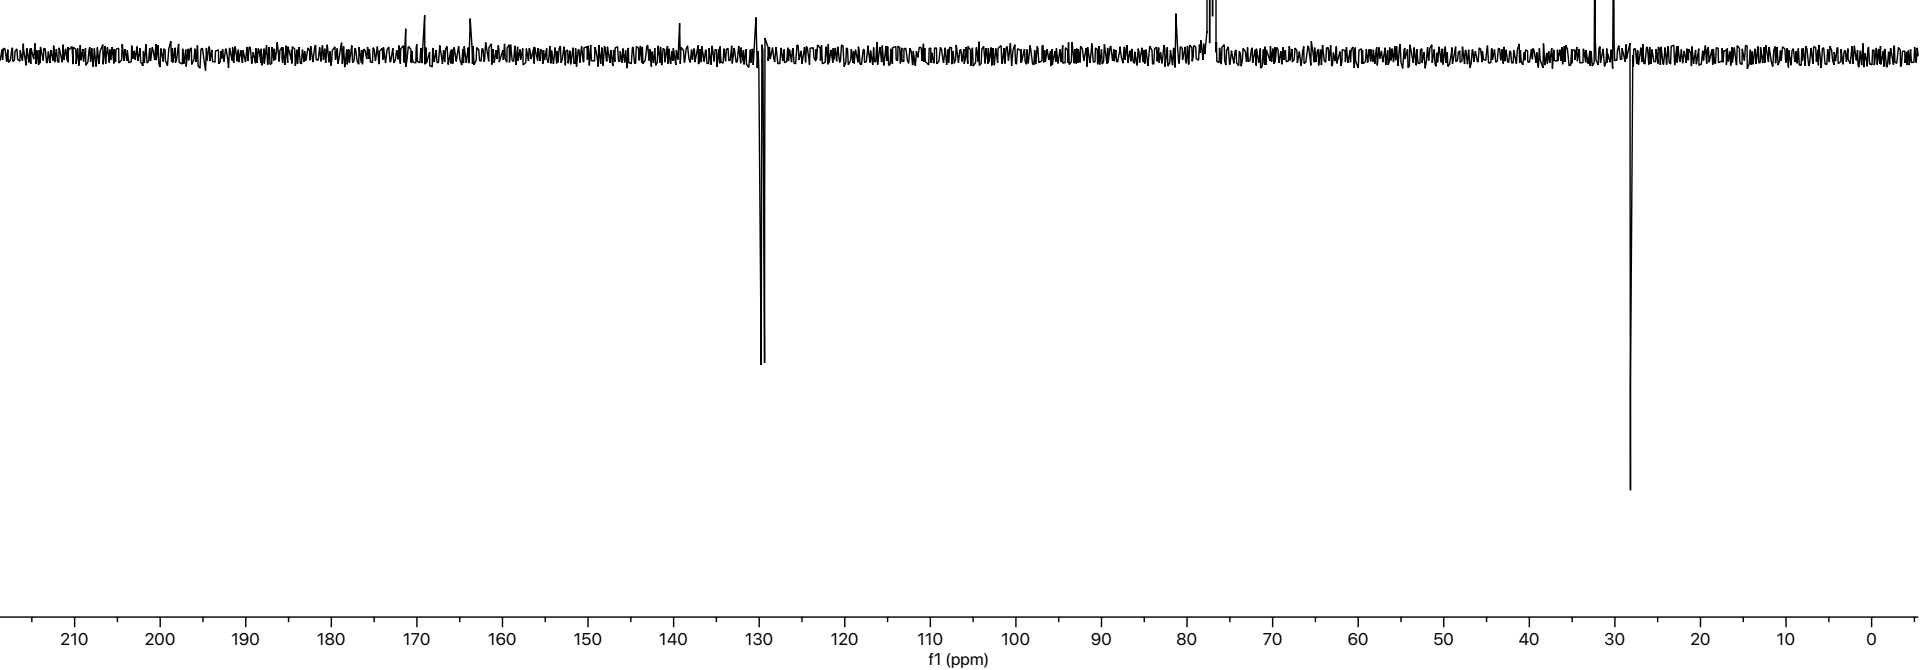



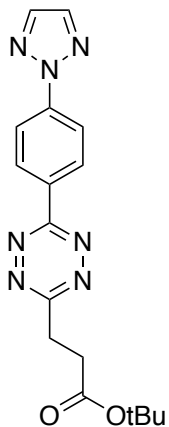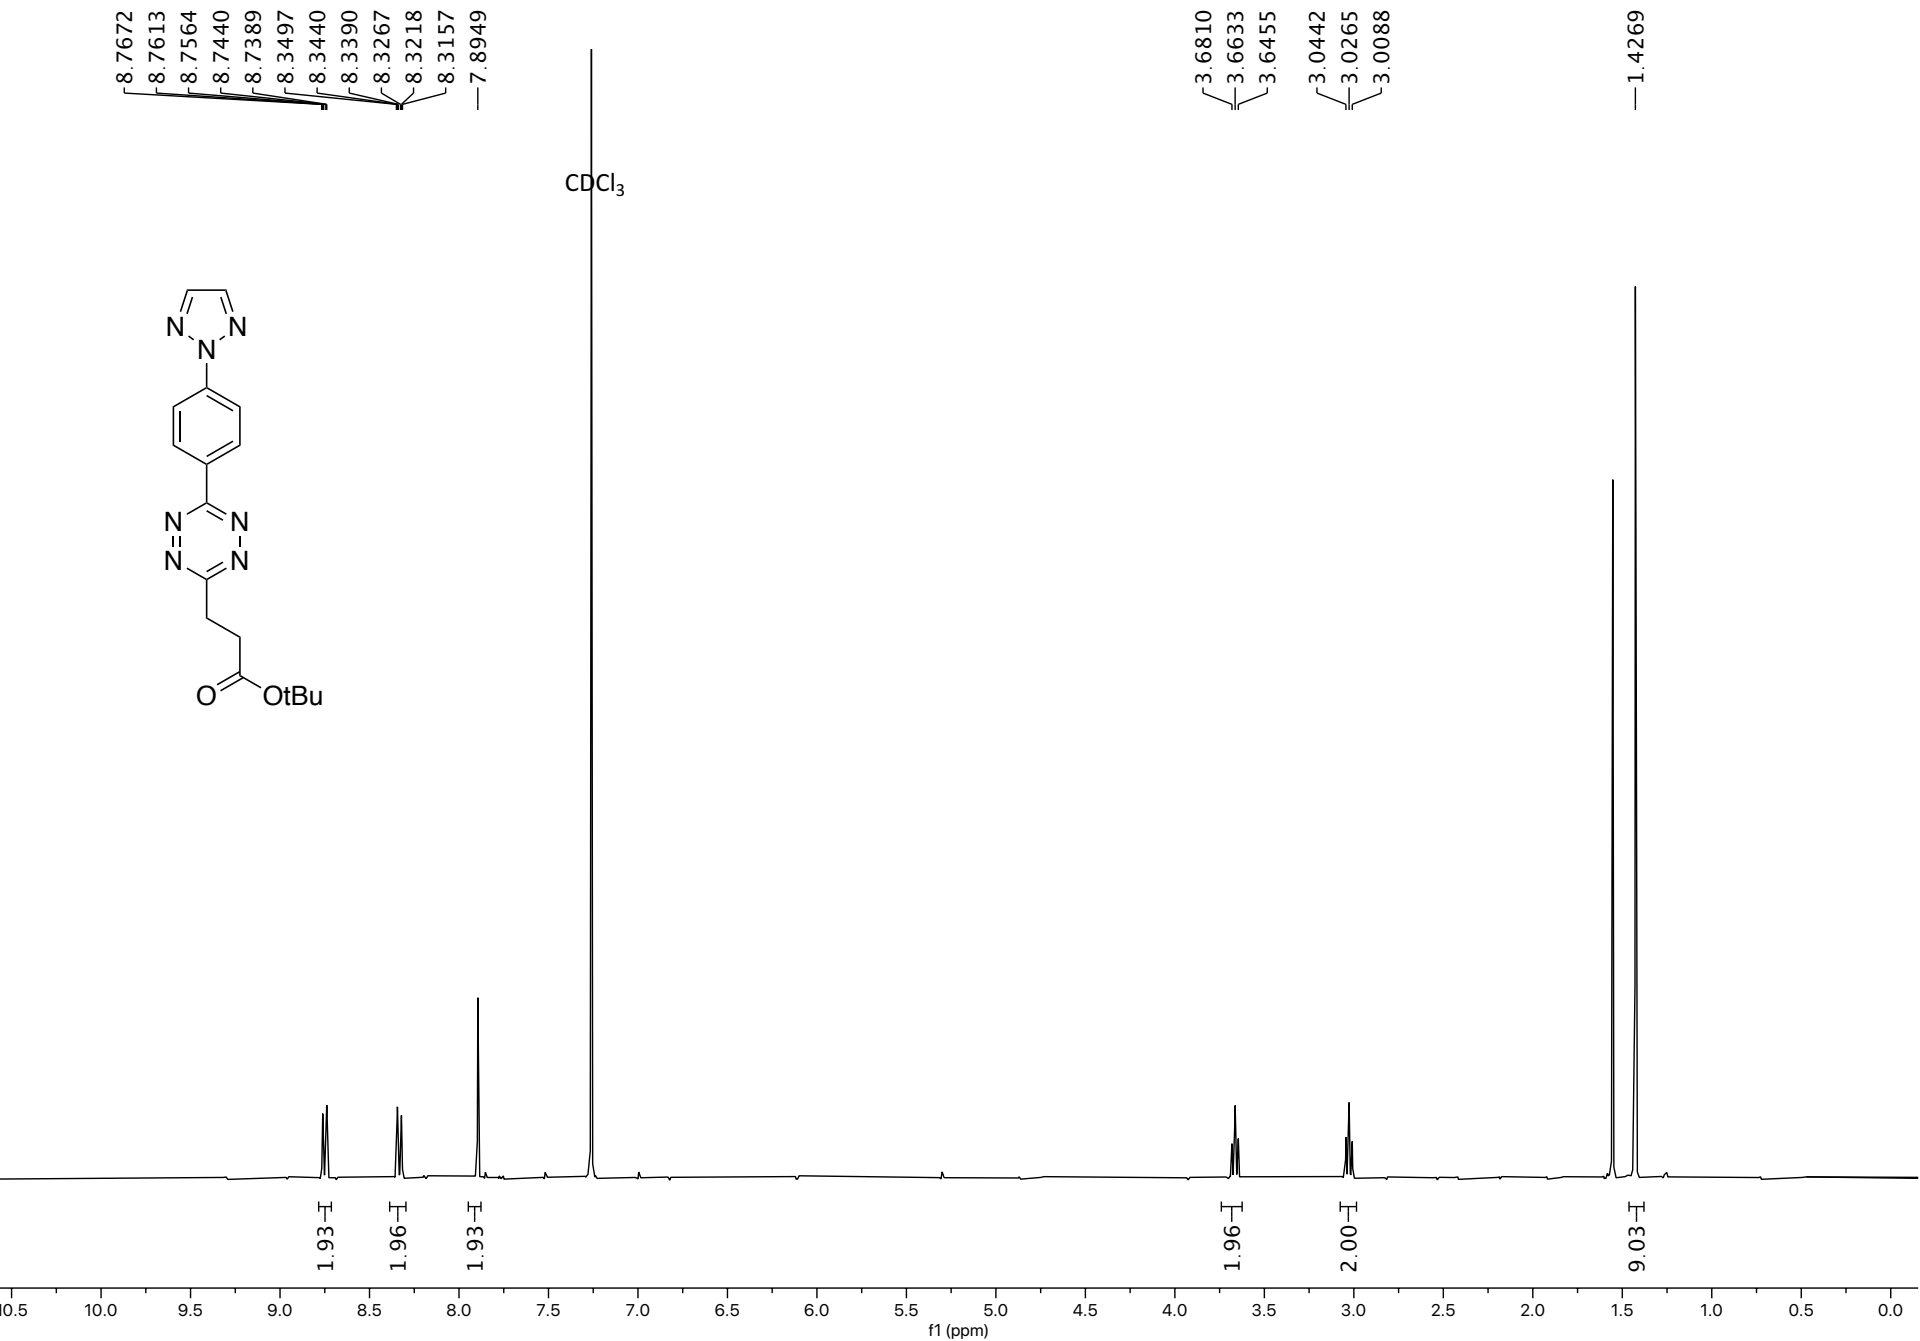

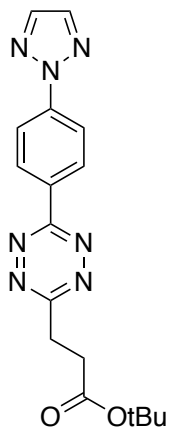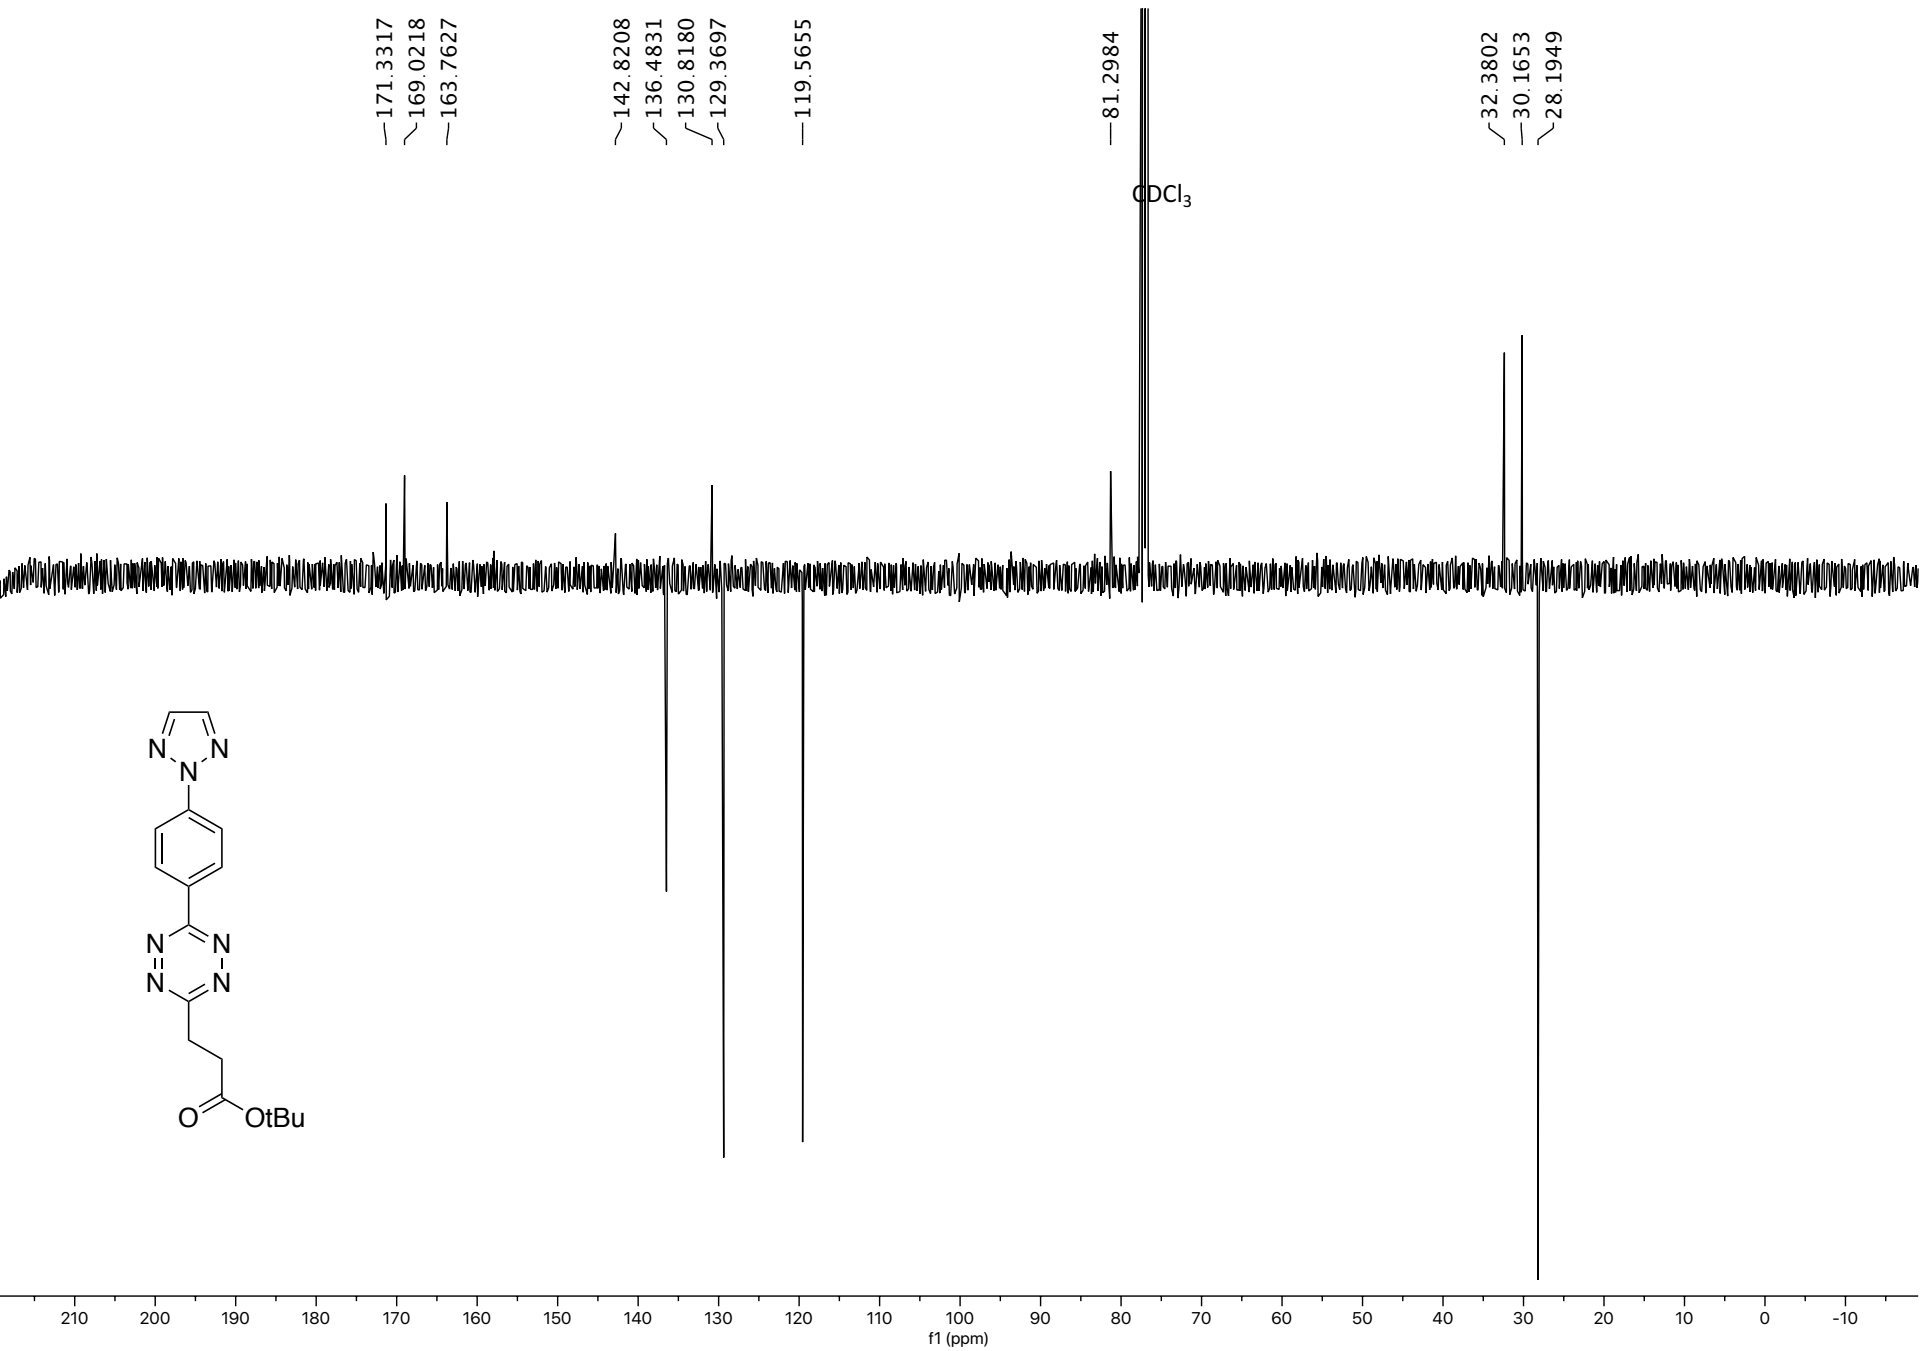

8.5325  
8.5295  
8.5261  
8.5129  
8.5094  
8.5062  
8.4424  
8.4365  
8.4107  
8.4053  
8.4007  
7.9692  
7.9630  
7.9472  
7.9410  
7.6884  
7.6682  
7.6483  
7.4450  
7.4423  
7.4387  
7.4361  
7.4247  
7.4221  
7.4185  
7.4159  
7.1335  
7.1119

3.6656  
3.6480  
3.6303  
3.0296  
3.0120  
2.9943

1.4129

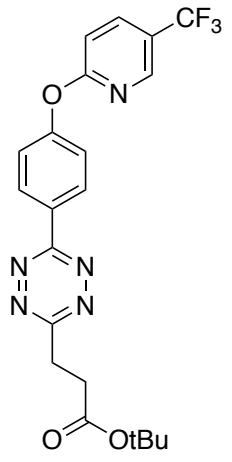

CDCl<sub>3</sub>

1.00  
0.96  
0.95  
0.98  
1.01  
1.00  
1.02  
2.00  
1.98  
9.25

10.0 9.5 9.0 8.5 8.0 7.5 7.0 6.5 6.0 5.5 5.0 4.5 4.0 3.5 3.0 2.5 2.0 1.5 1.0 0.5 0.0

f1 (ppm)

S187

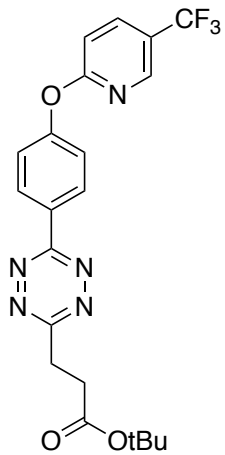

171.2501  
169.2026  
165.4992  
165.4837  
163.7730  
154.0509  
145.5908  
145.5475  
145.5043  
145.4603  
137.1032  
137.0705  
137.0393  
137.0075  
133.7034  
130.8154  
127.7682  
125.8876  
125.0701  
125.0249  
122.5566  
122.3704  
122.2254  
121.8938  
121.5628  
121.0868  
119.6716  
111.8606  
81.2292

32.2697  
30.1132  
28.1313

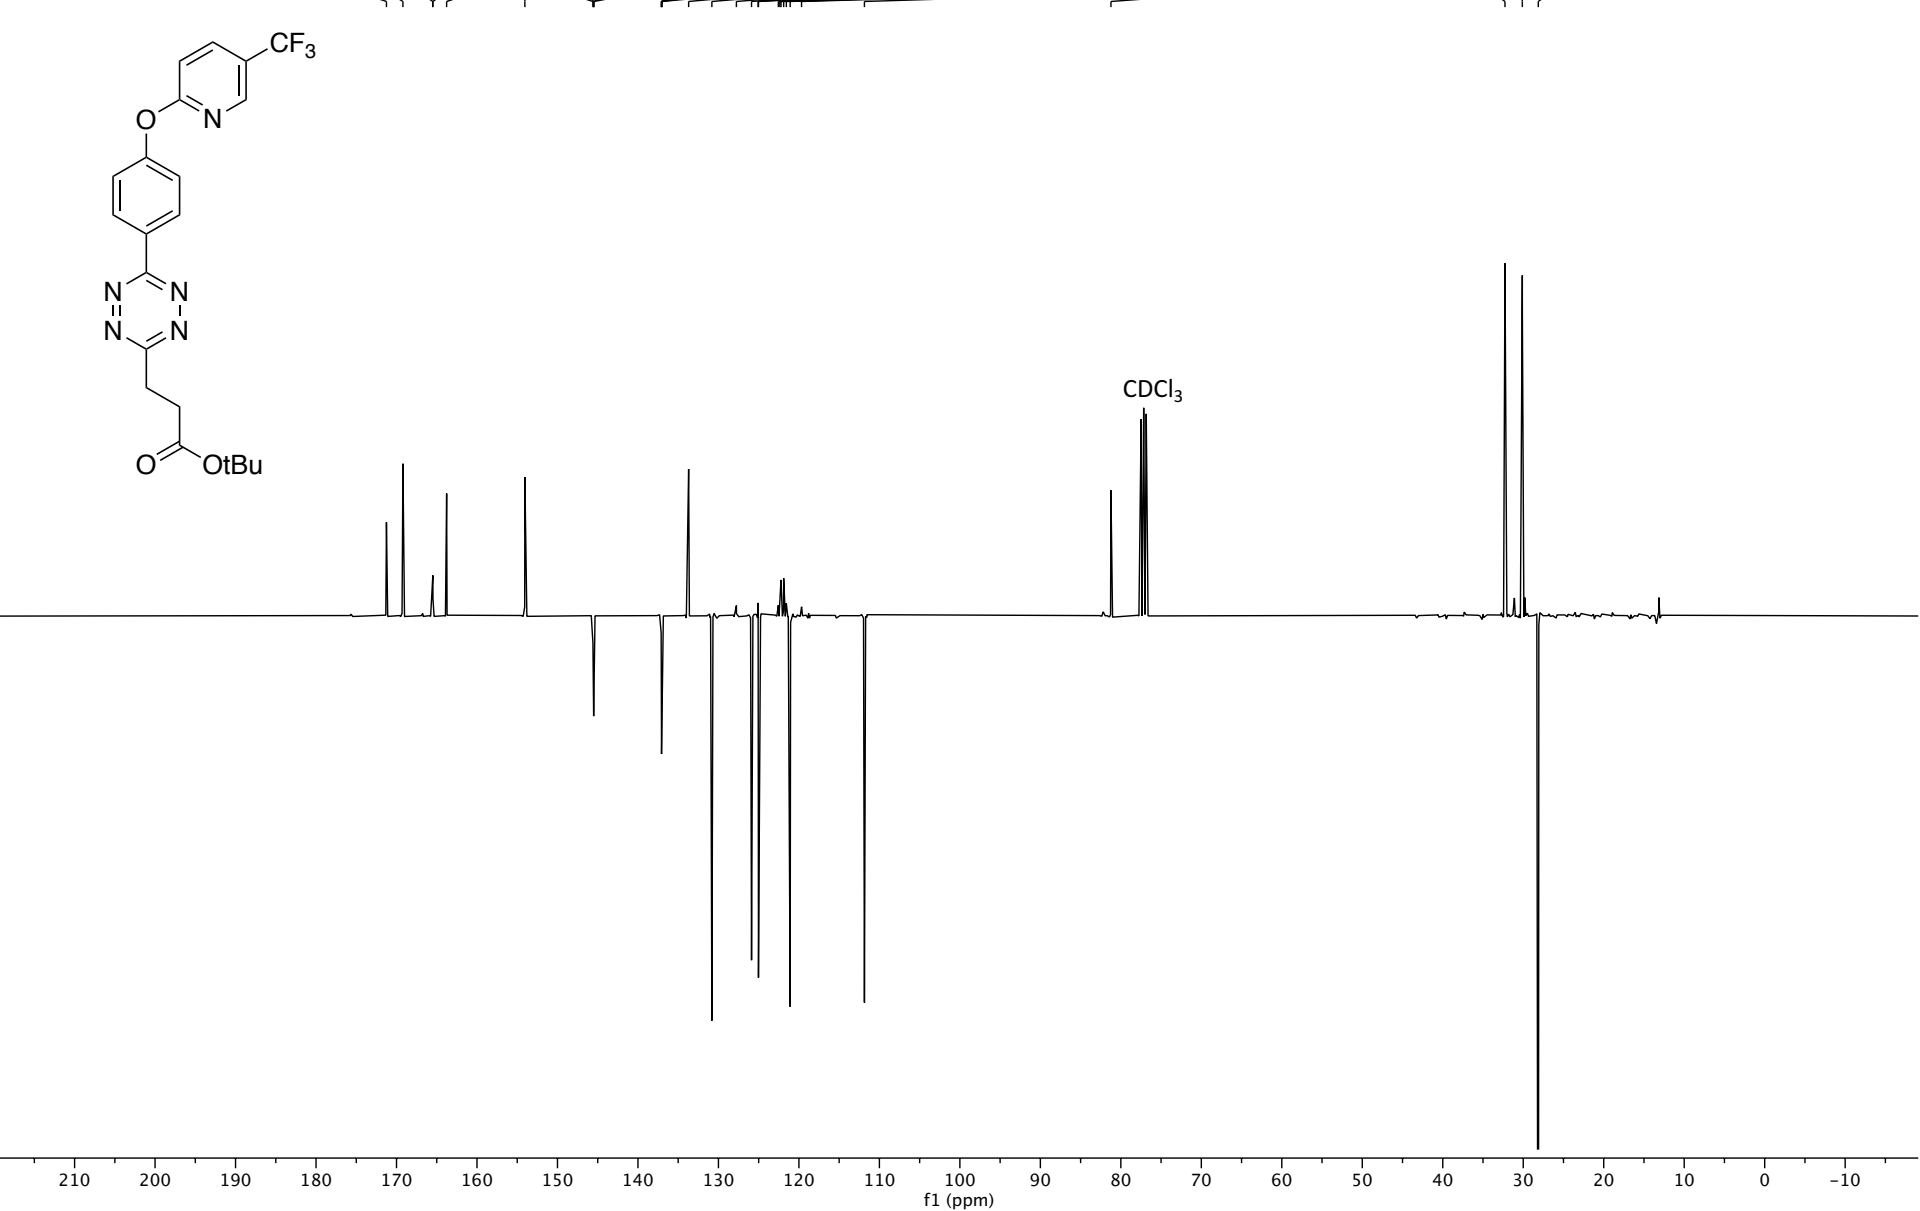

8.6826  
8.6619  
8.2564  
8.2358

5.6244

5.0486  
5.0337

3.9777

1.4654

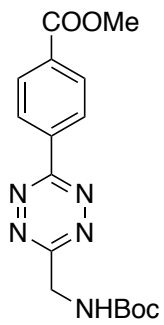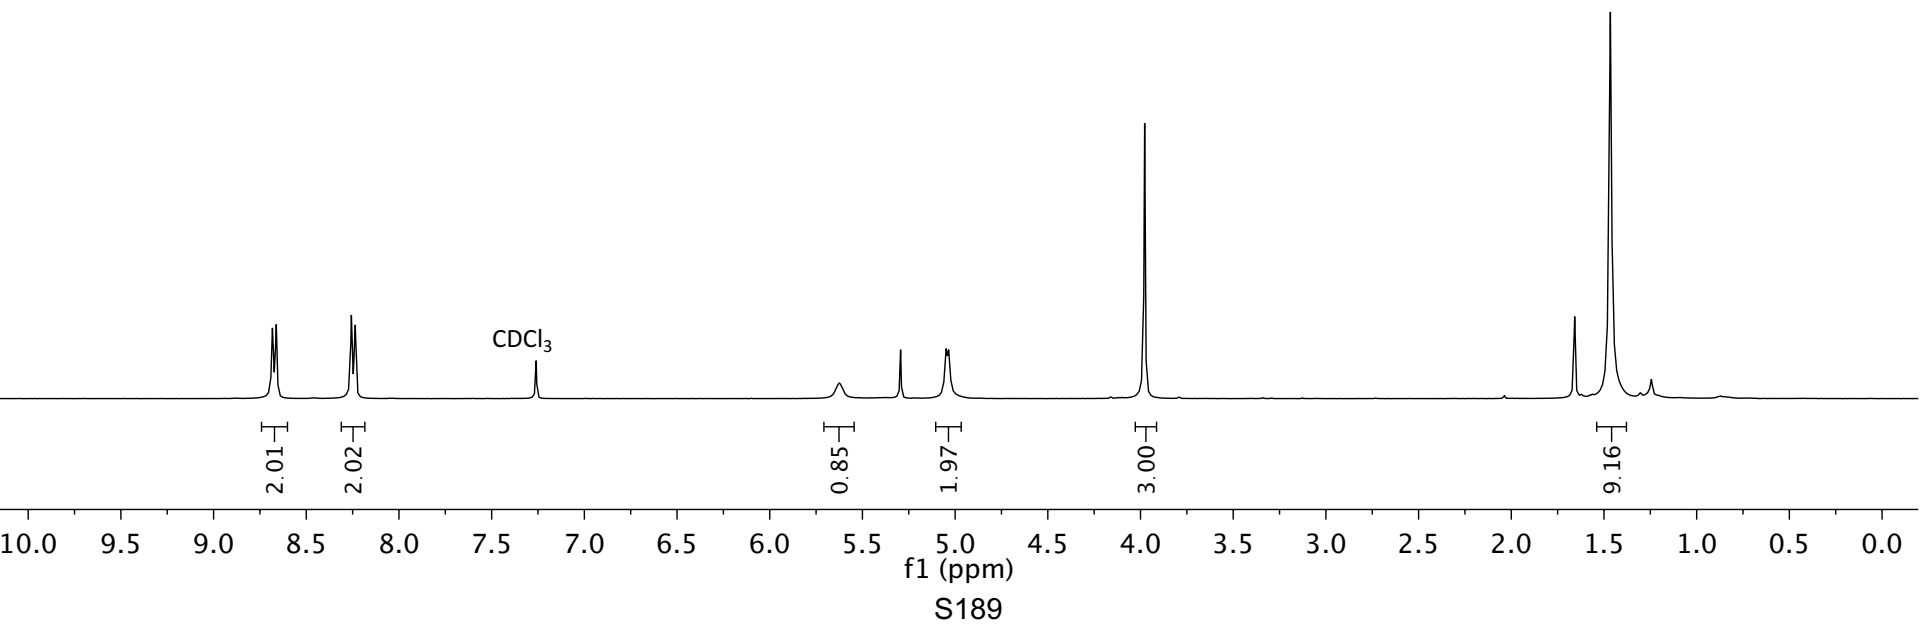

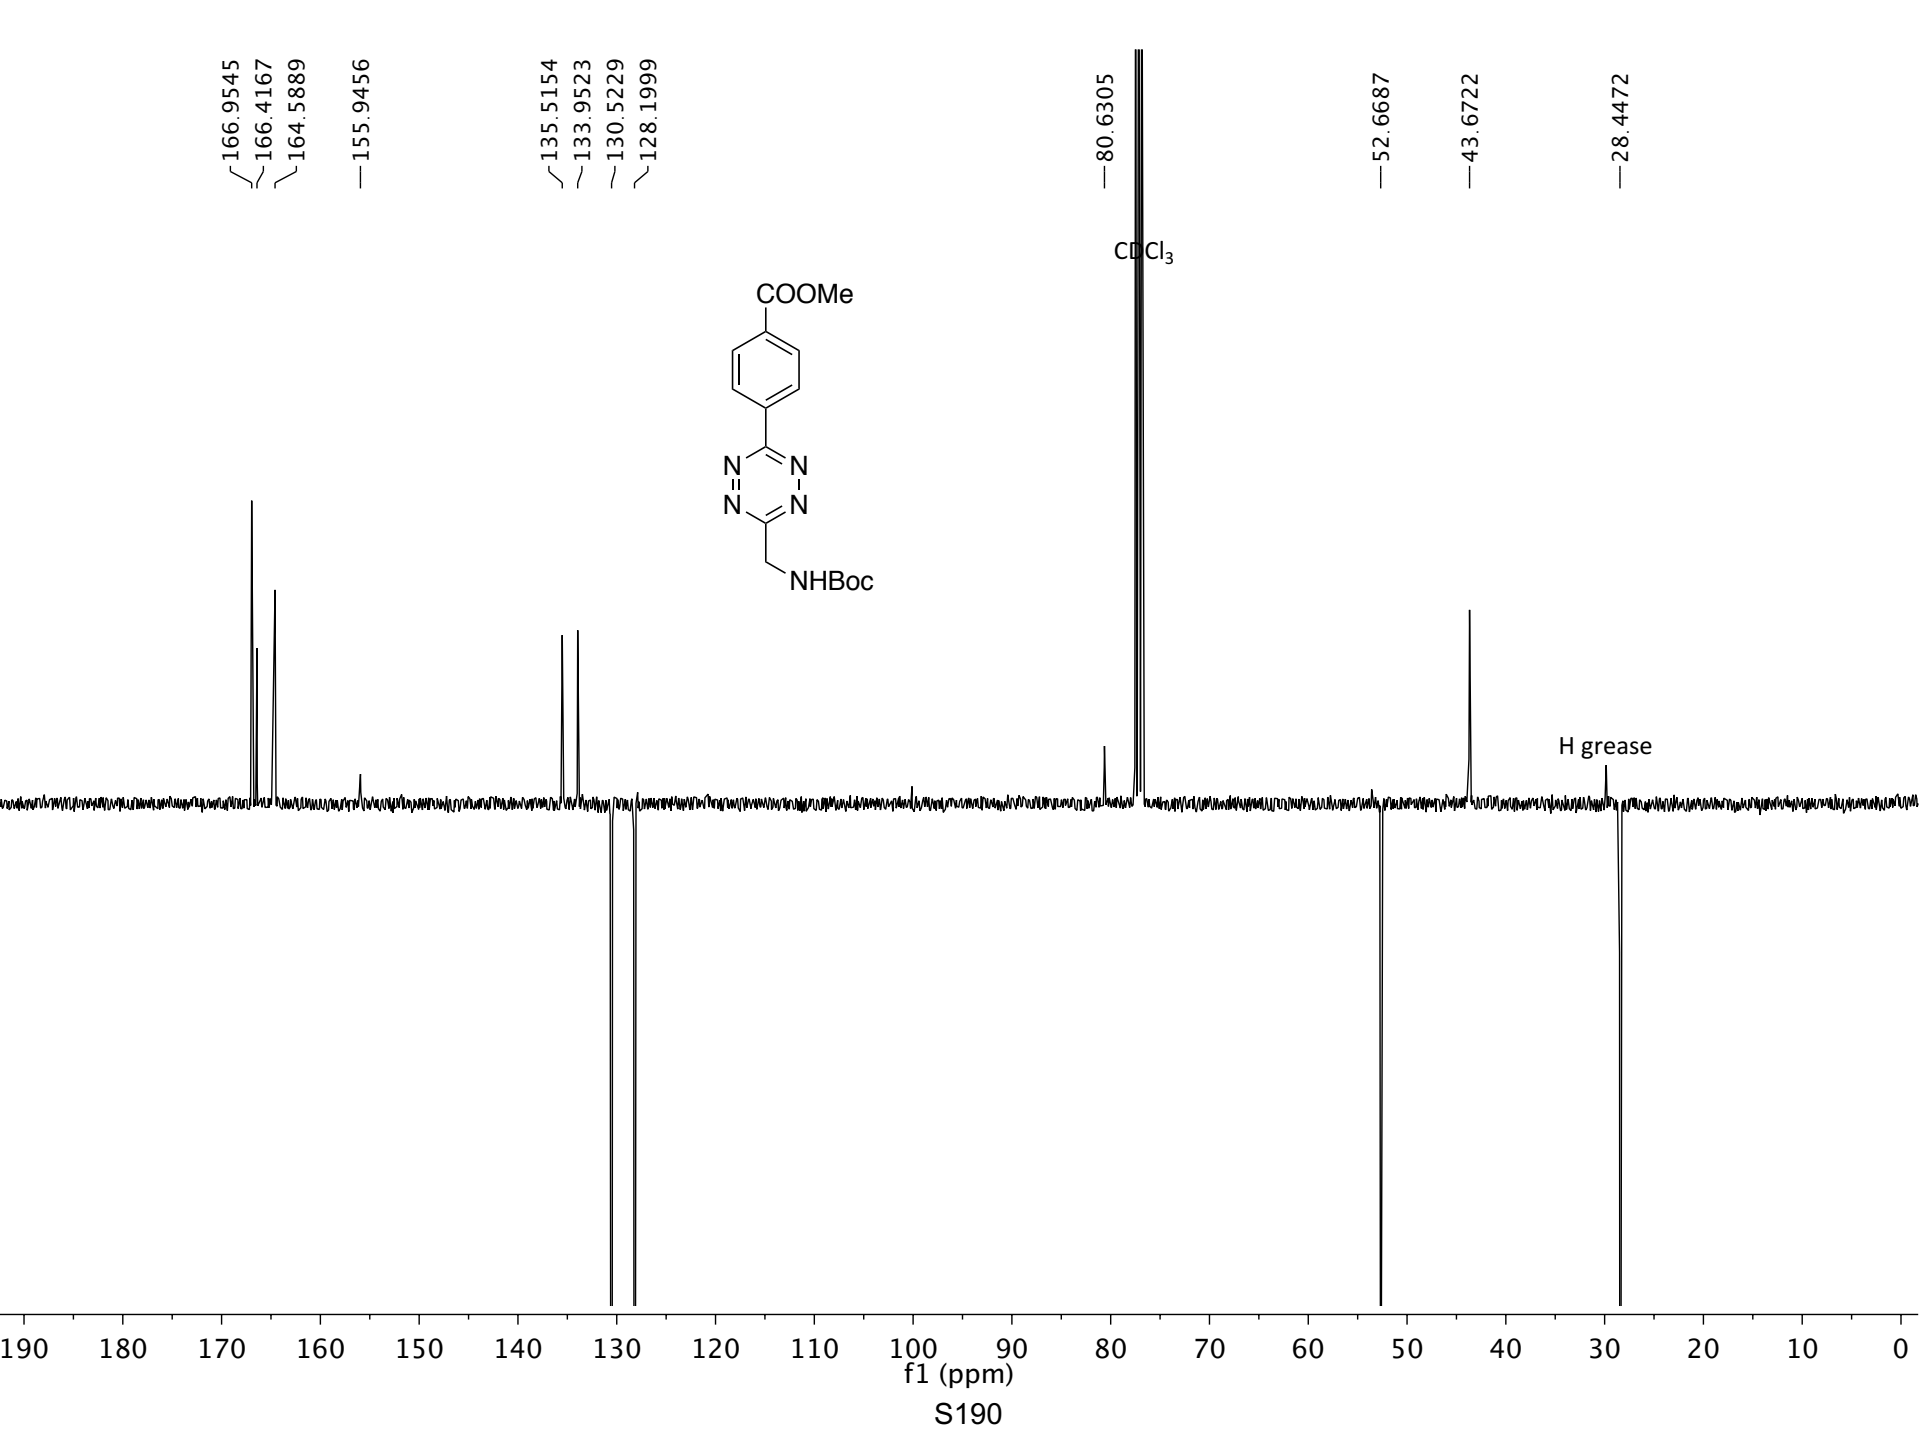

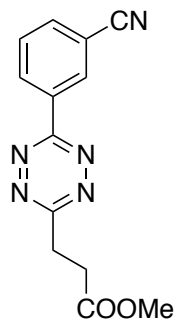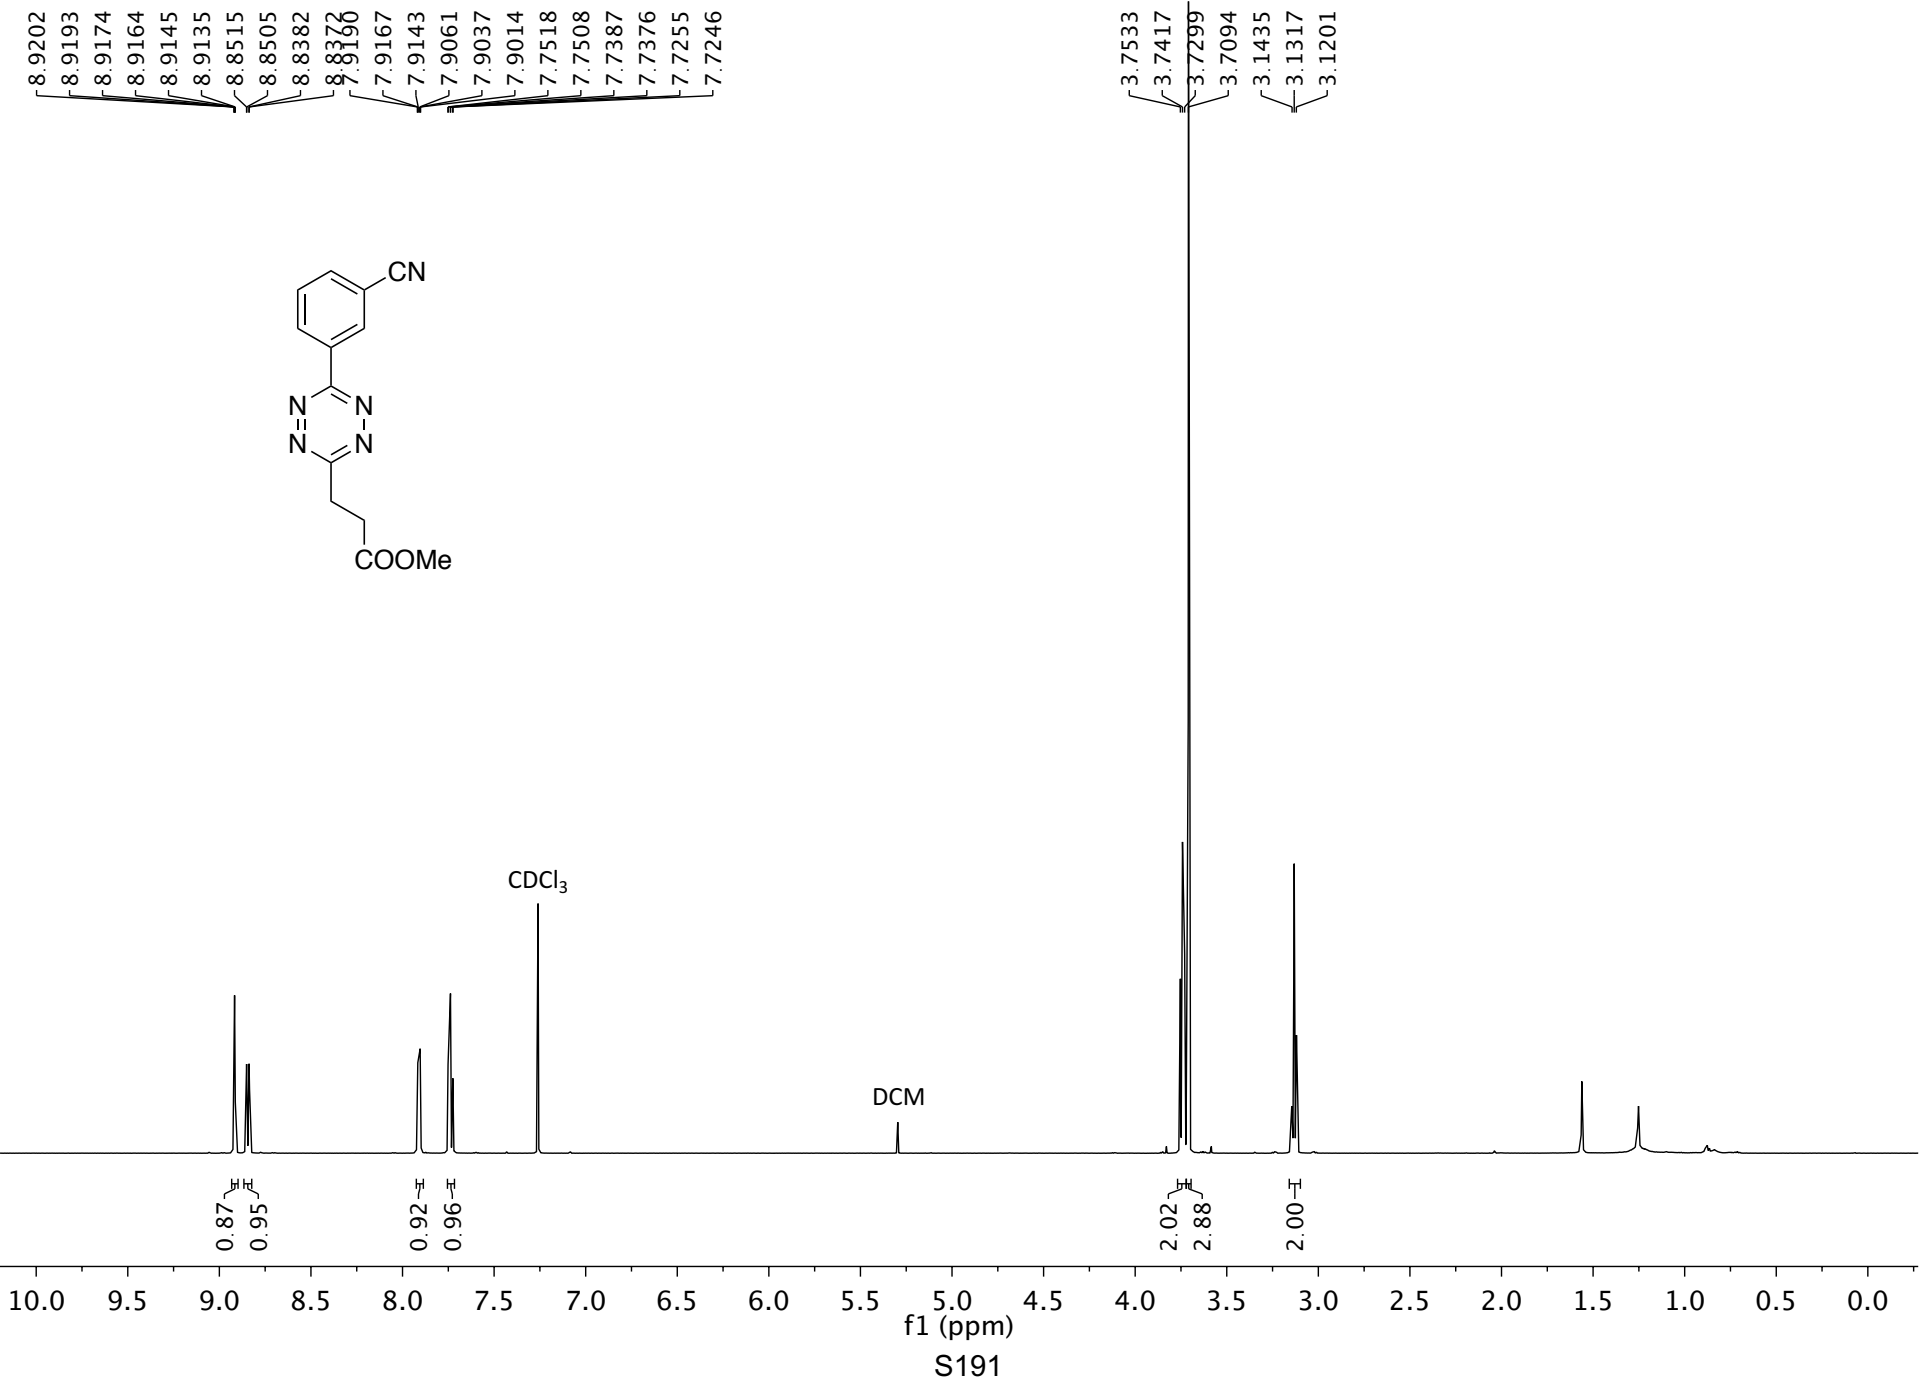

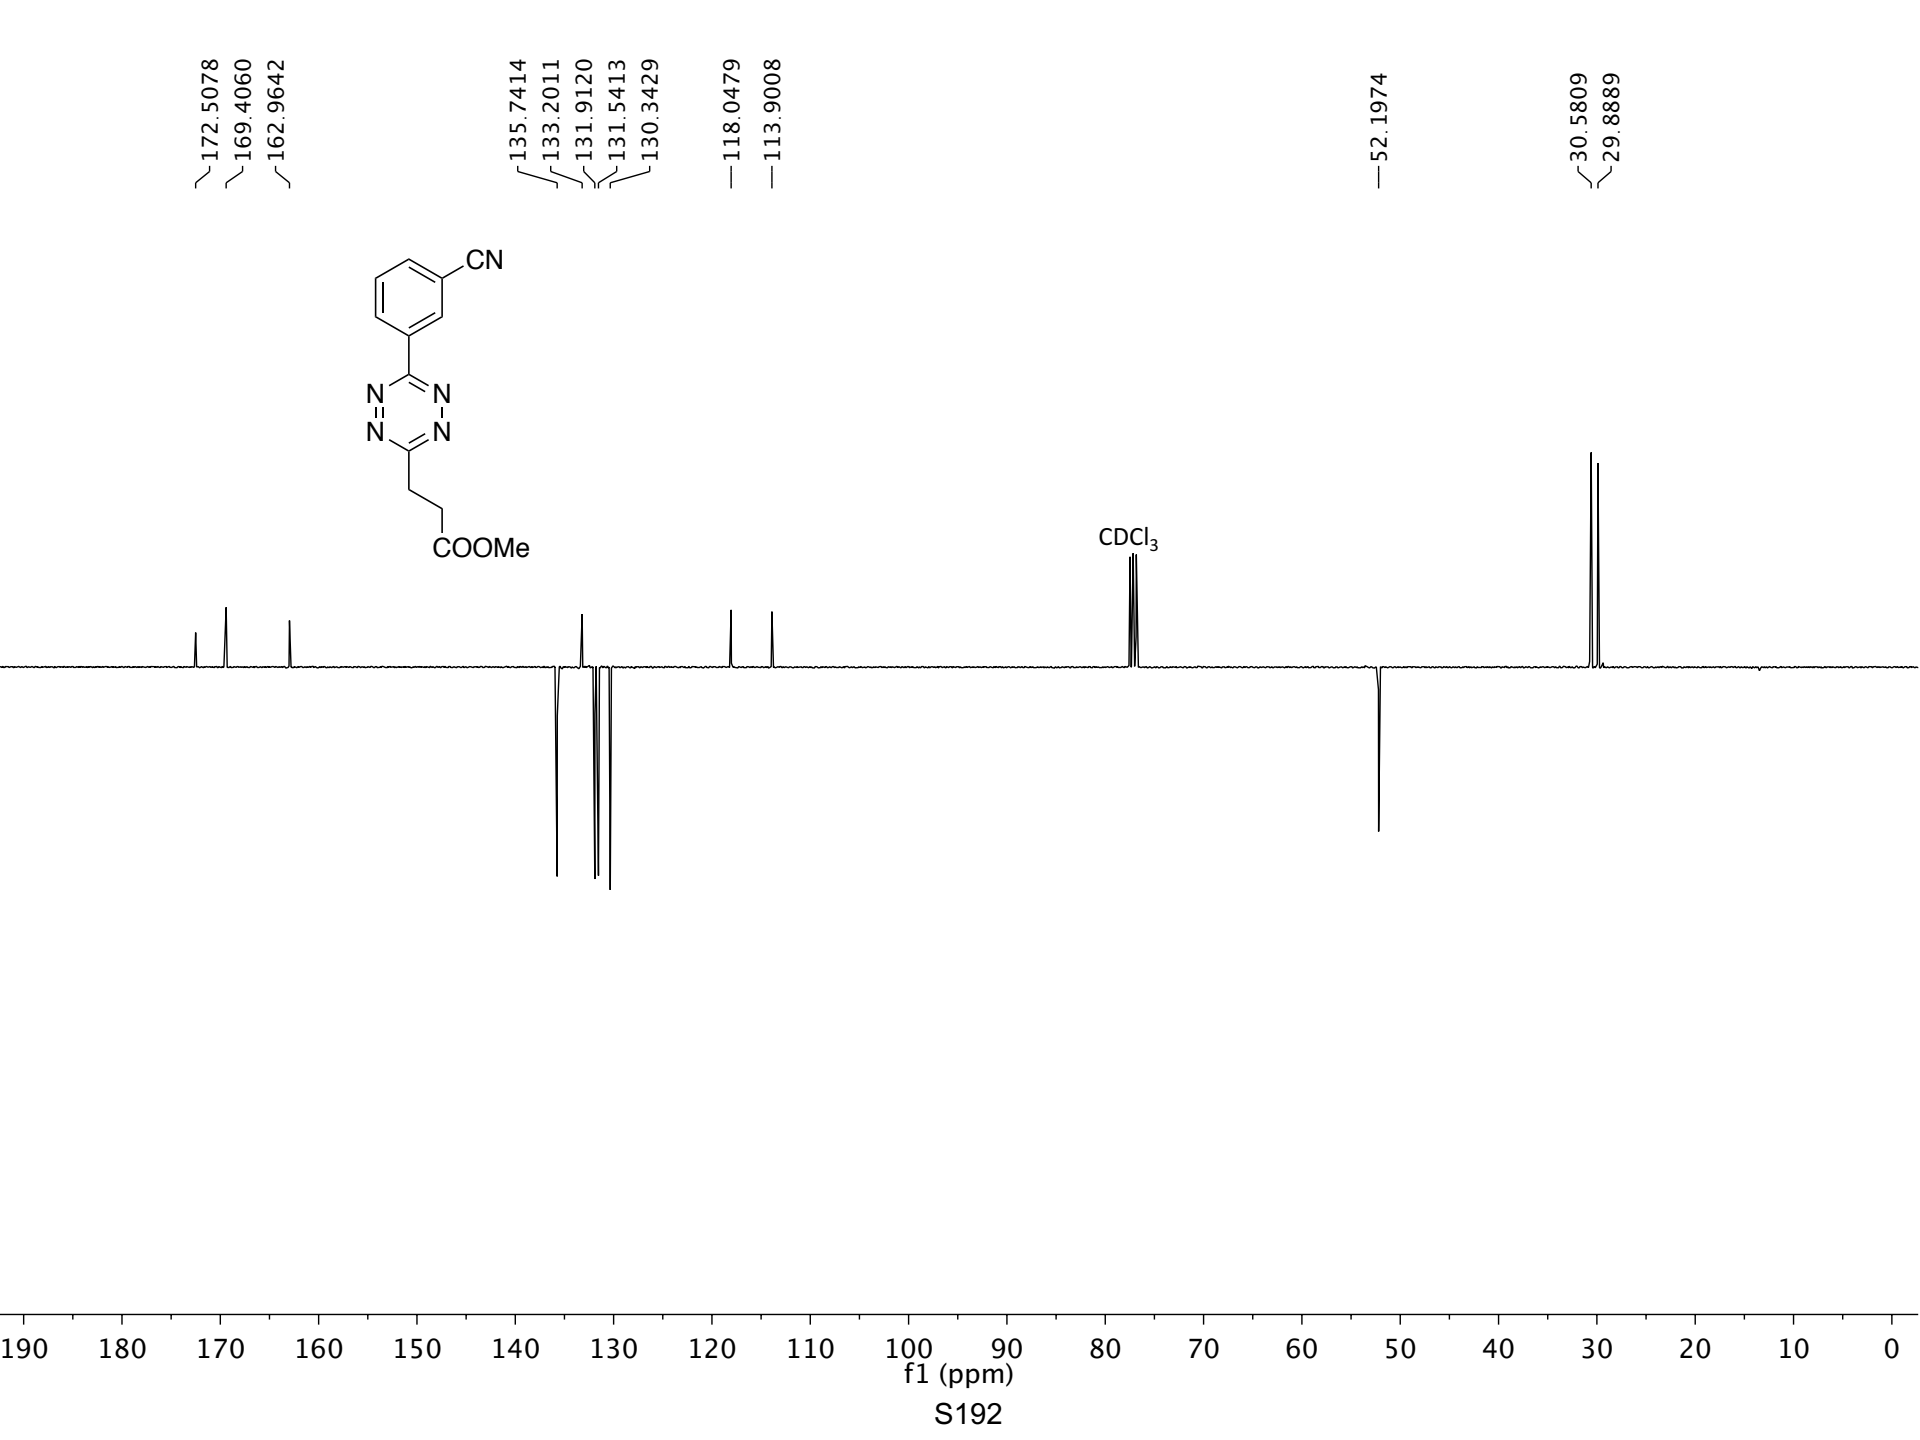



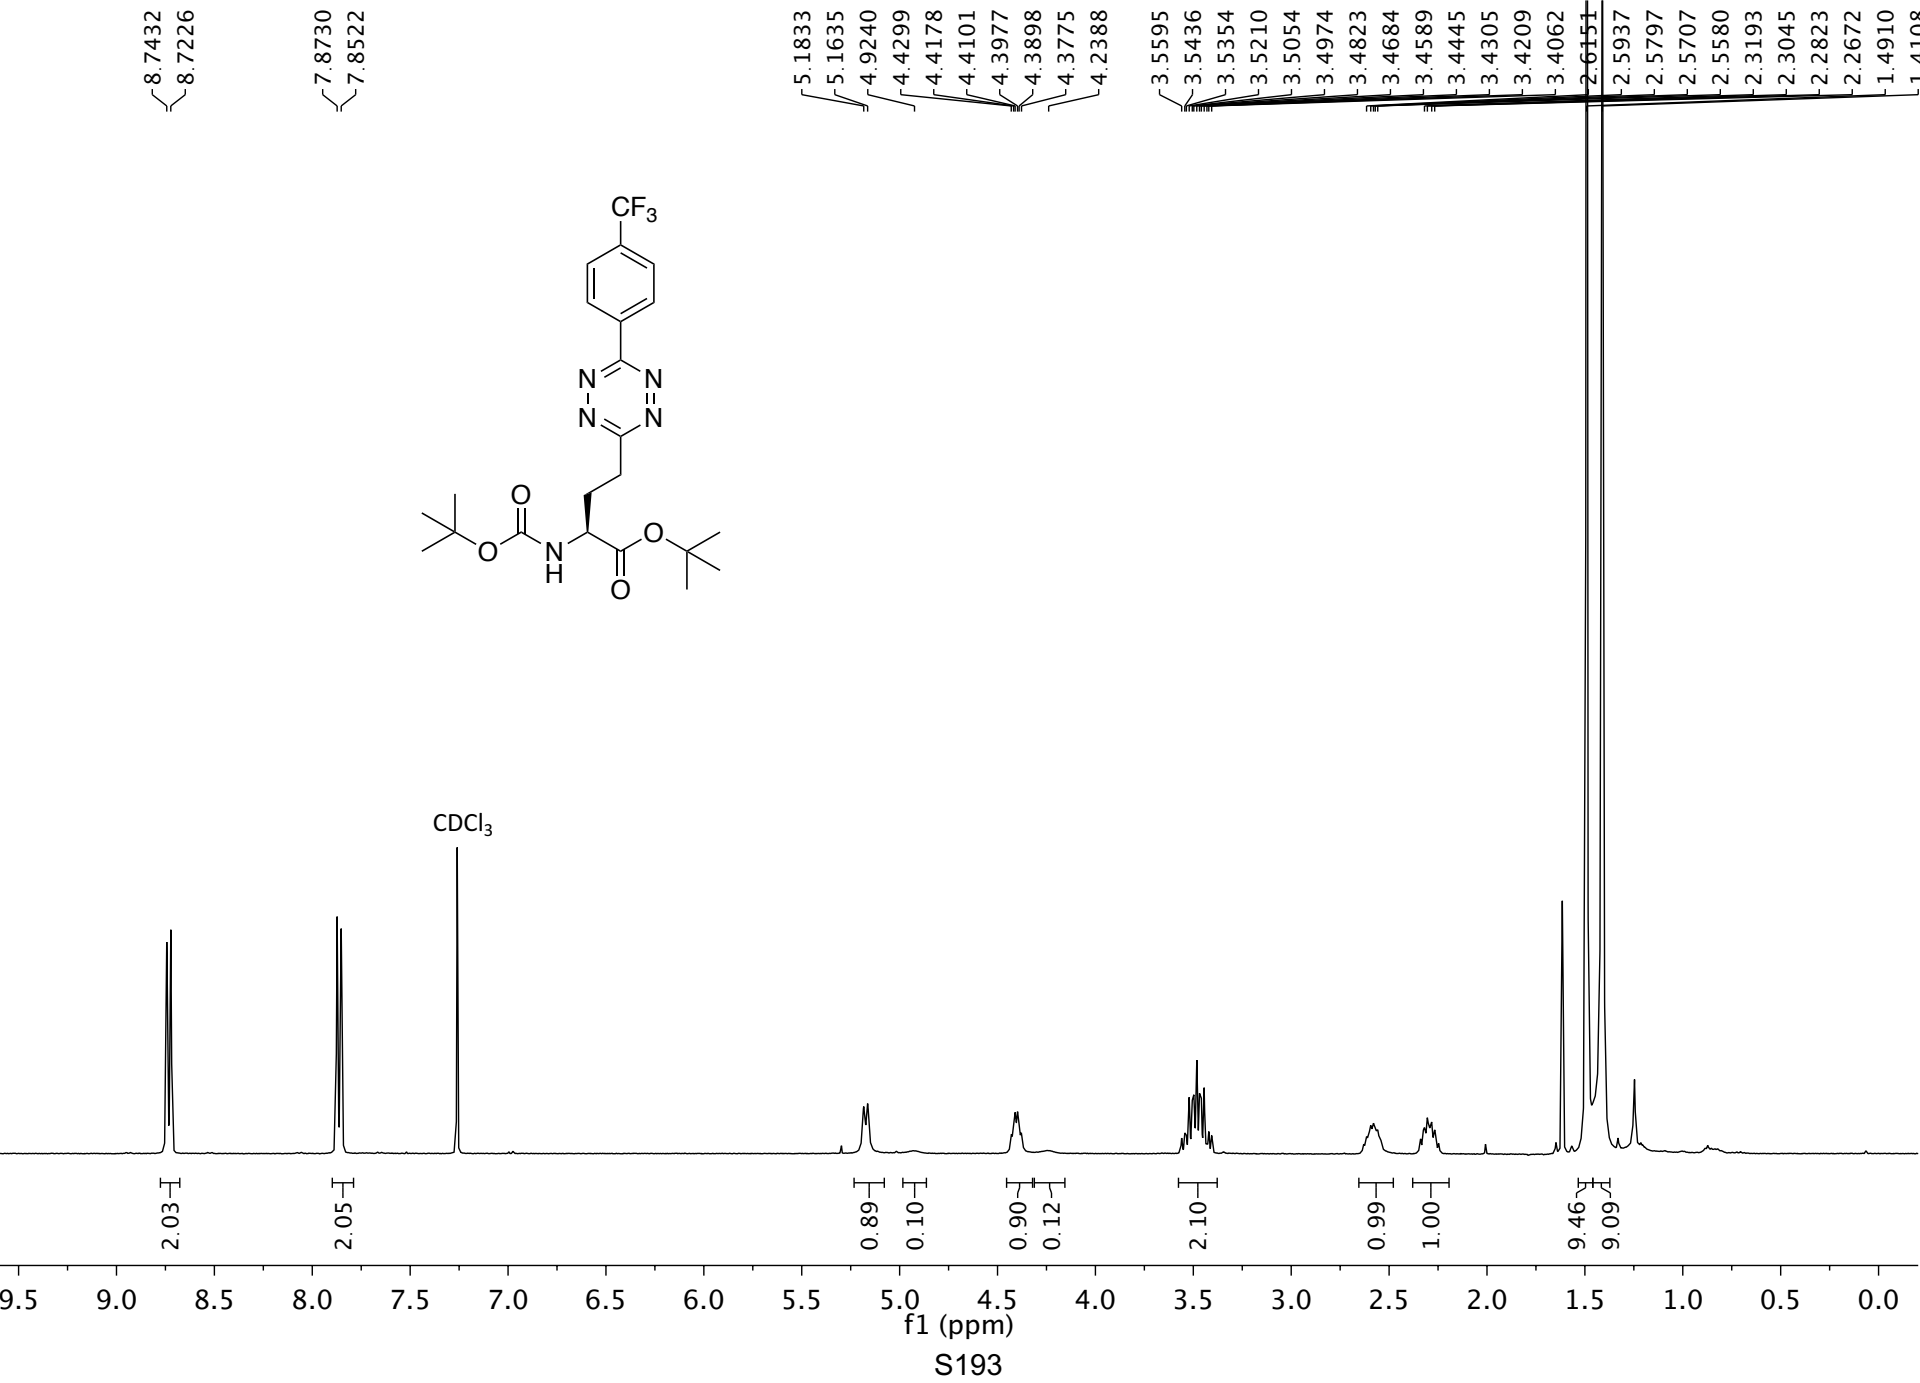

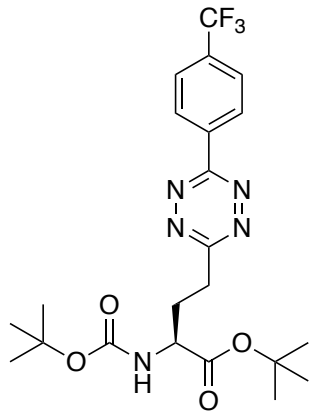

- 171.2600
- 170.0315
- 163.4597
- 155.4456
- 135.1732
- 134.7456
- 134.4219
- 134.0947
- 133.7724
- 128.3853
- 127.8981
- 126.3488
- 126.3122
- 126.2932
- 126.2739
- 125.1886
- 122.4776
- 119.7699

- 82.7174
- 80.1081

- 53.5006

- 31.1823
- 28.4025
- 28.1402

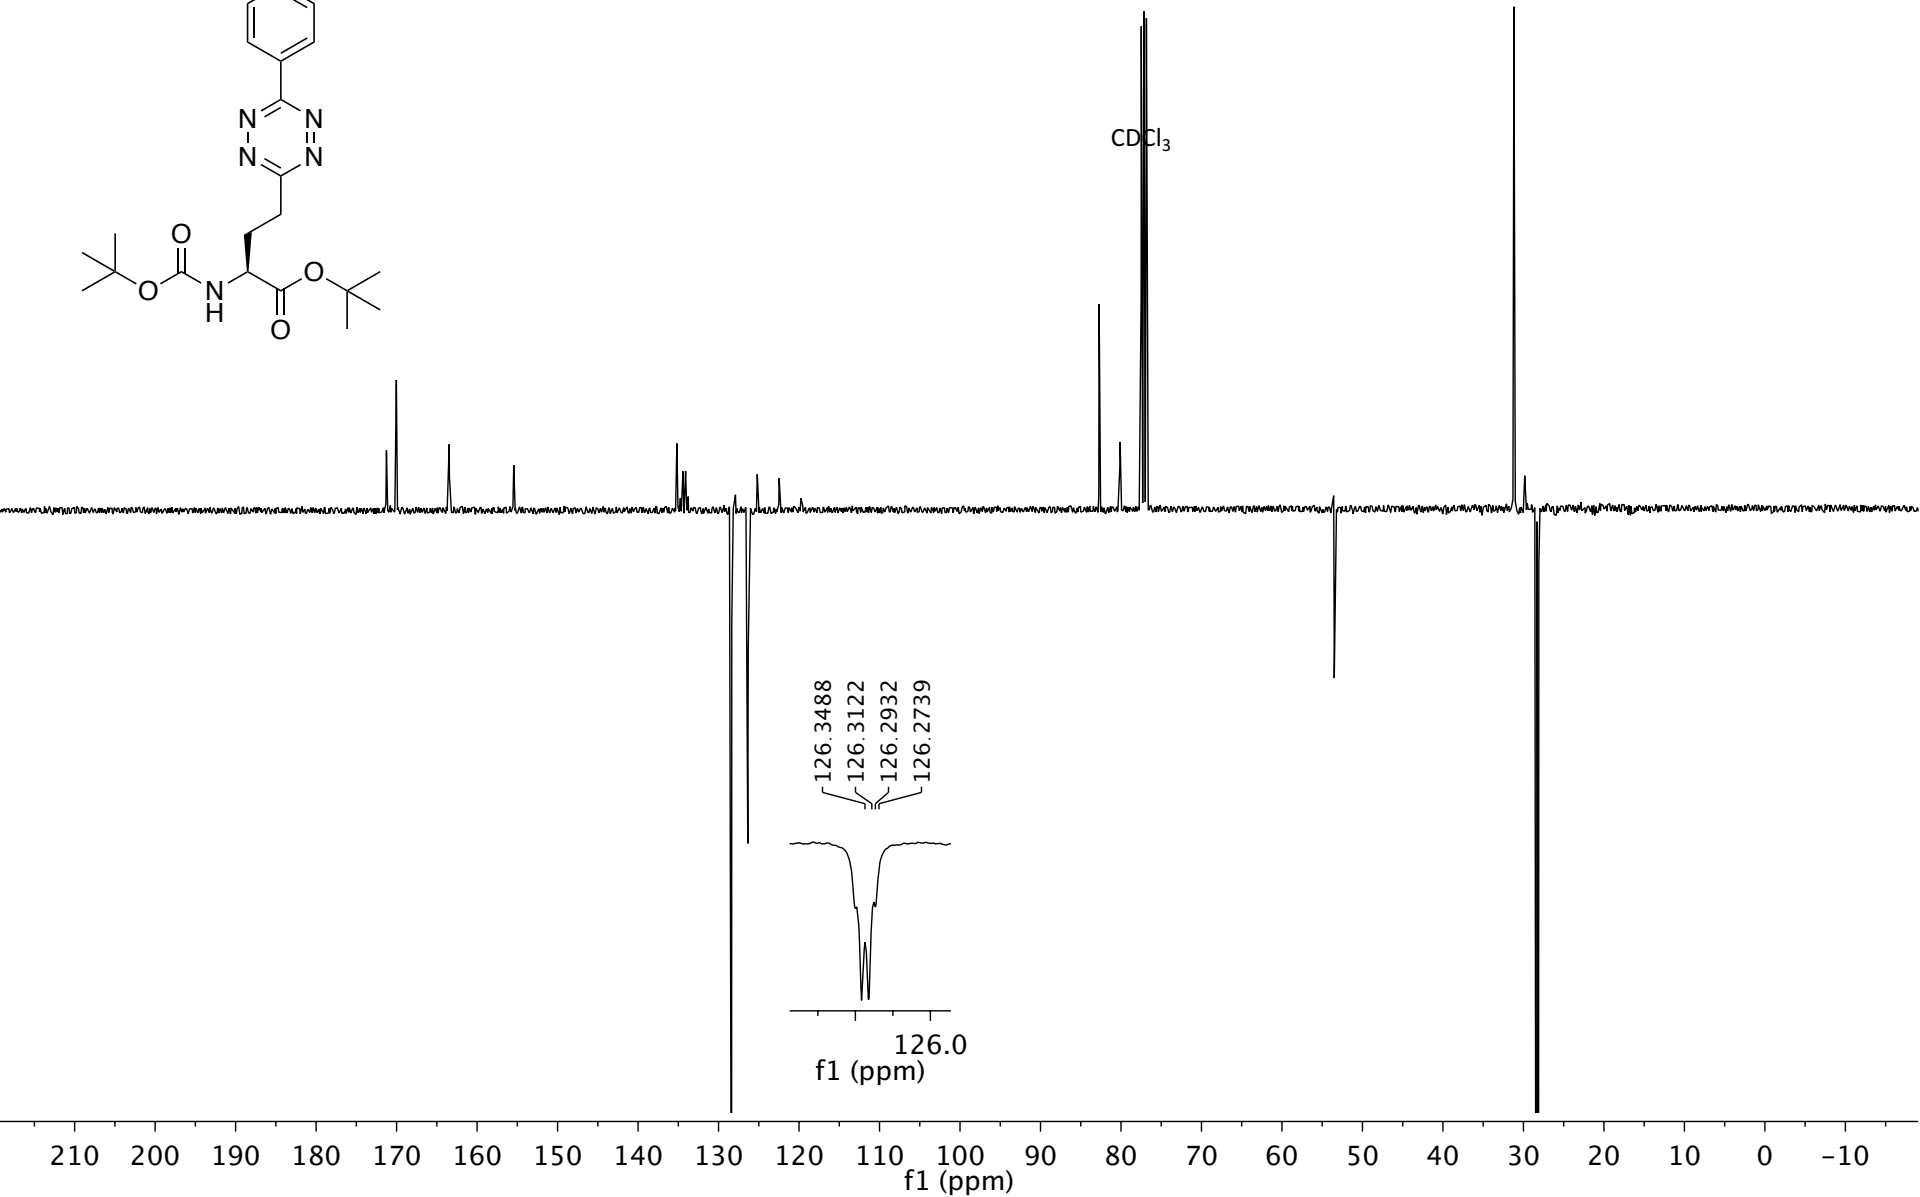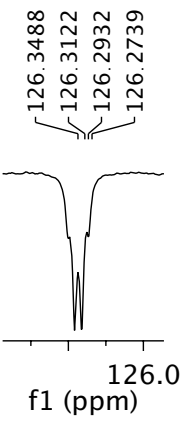

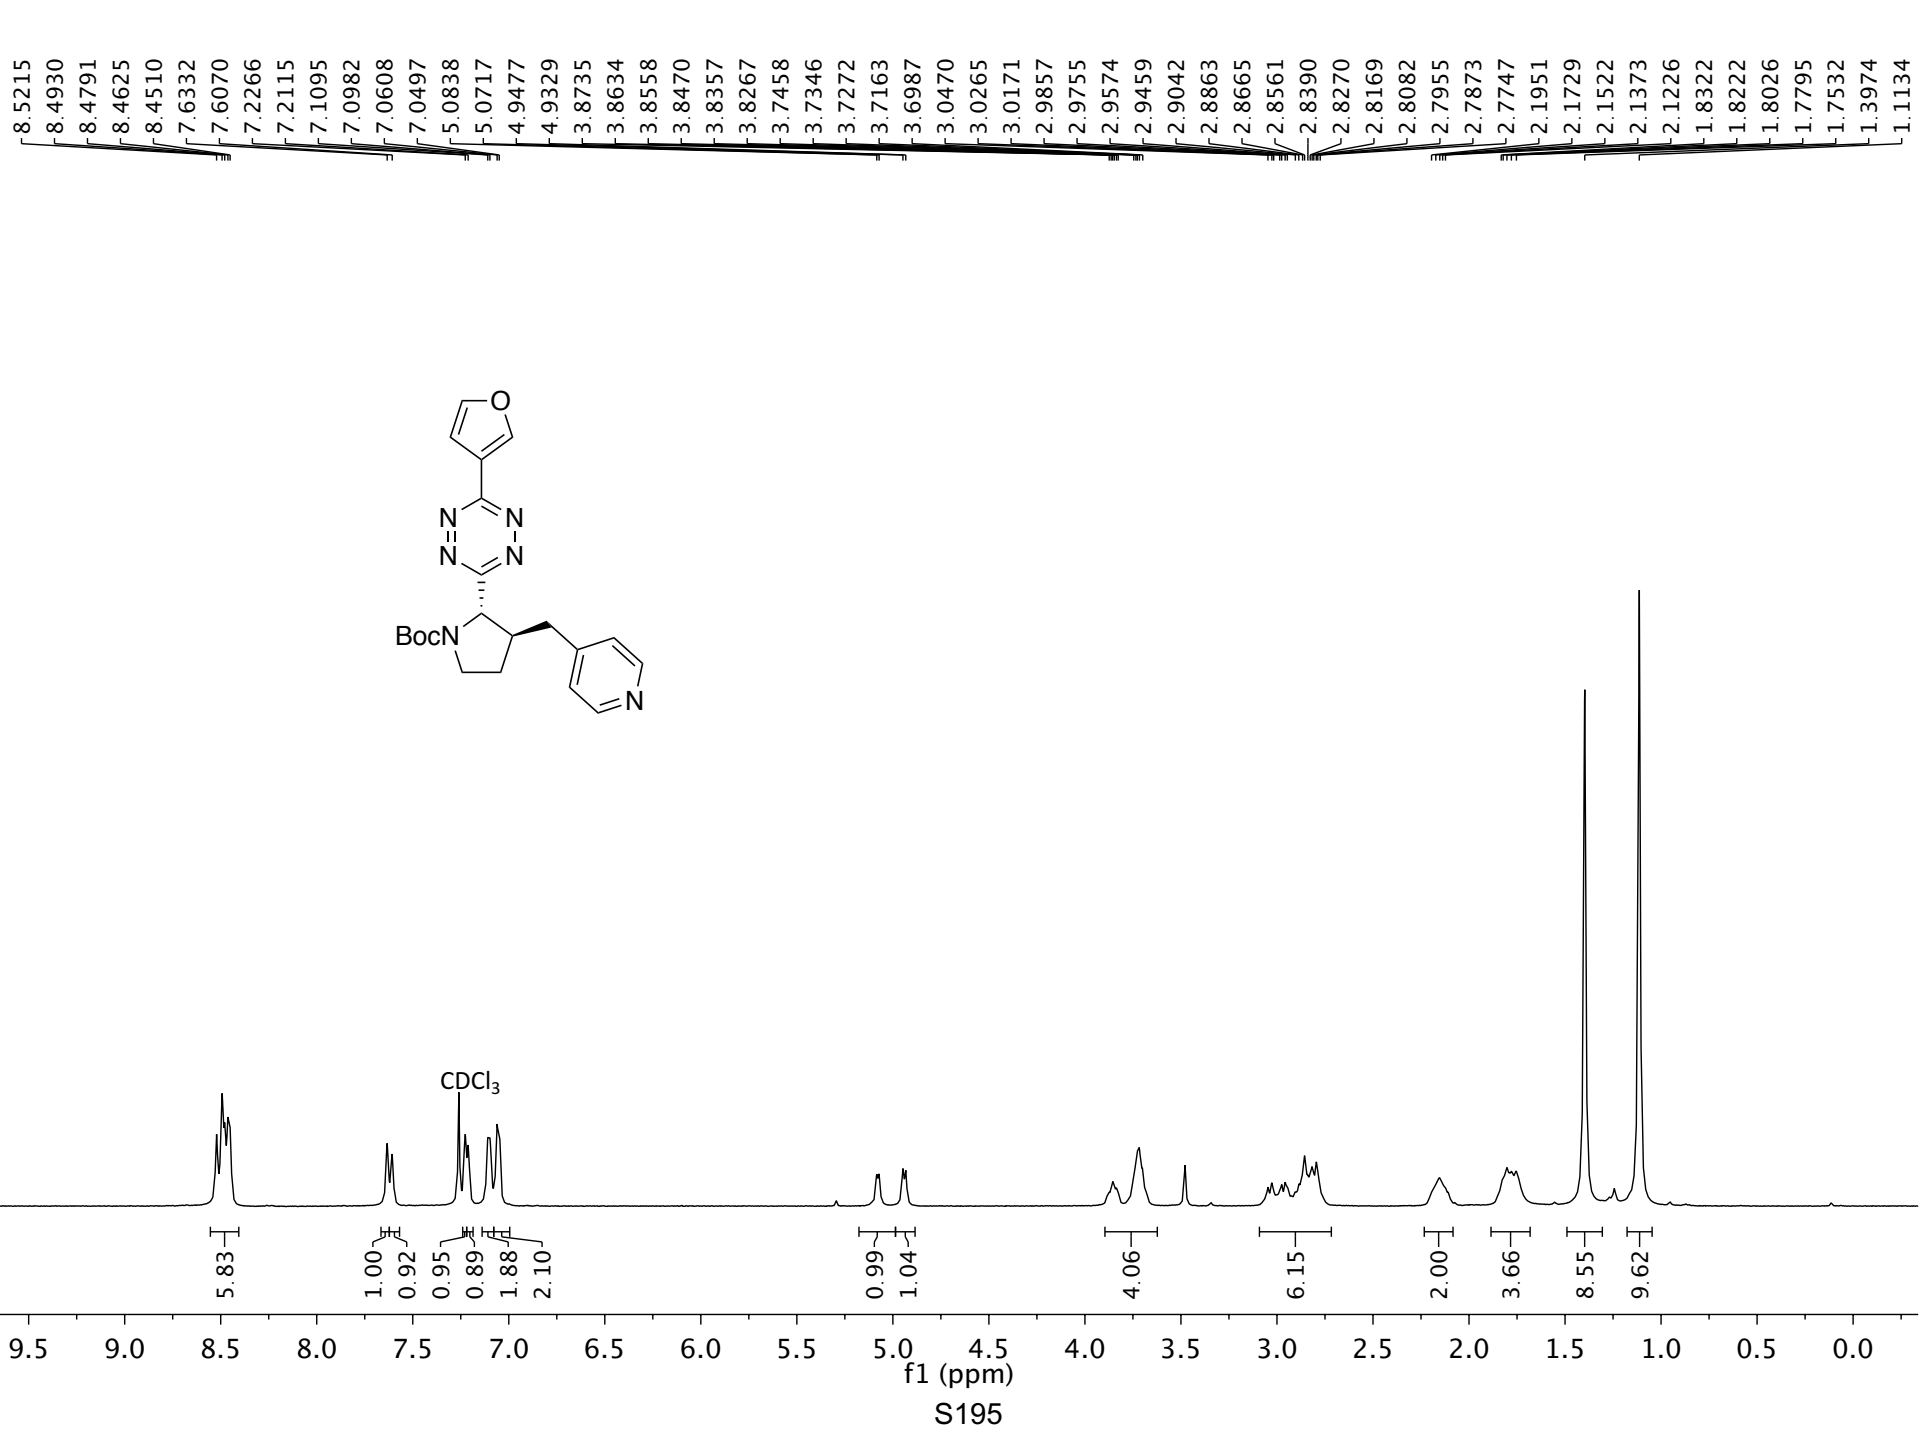

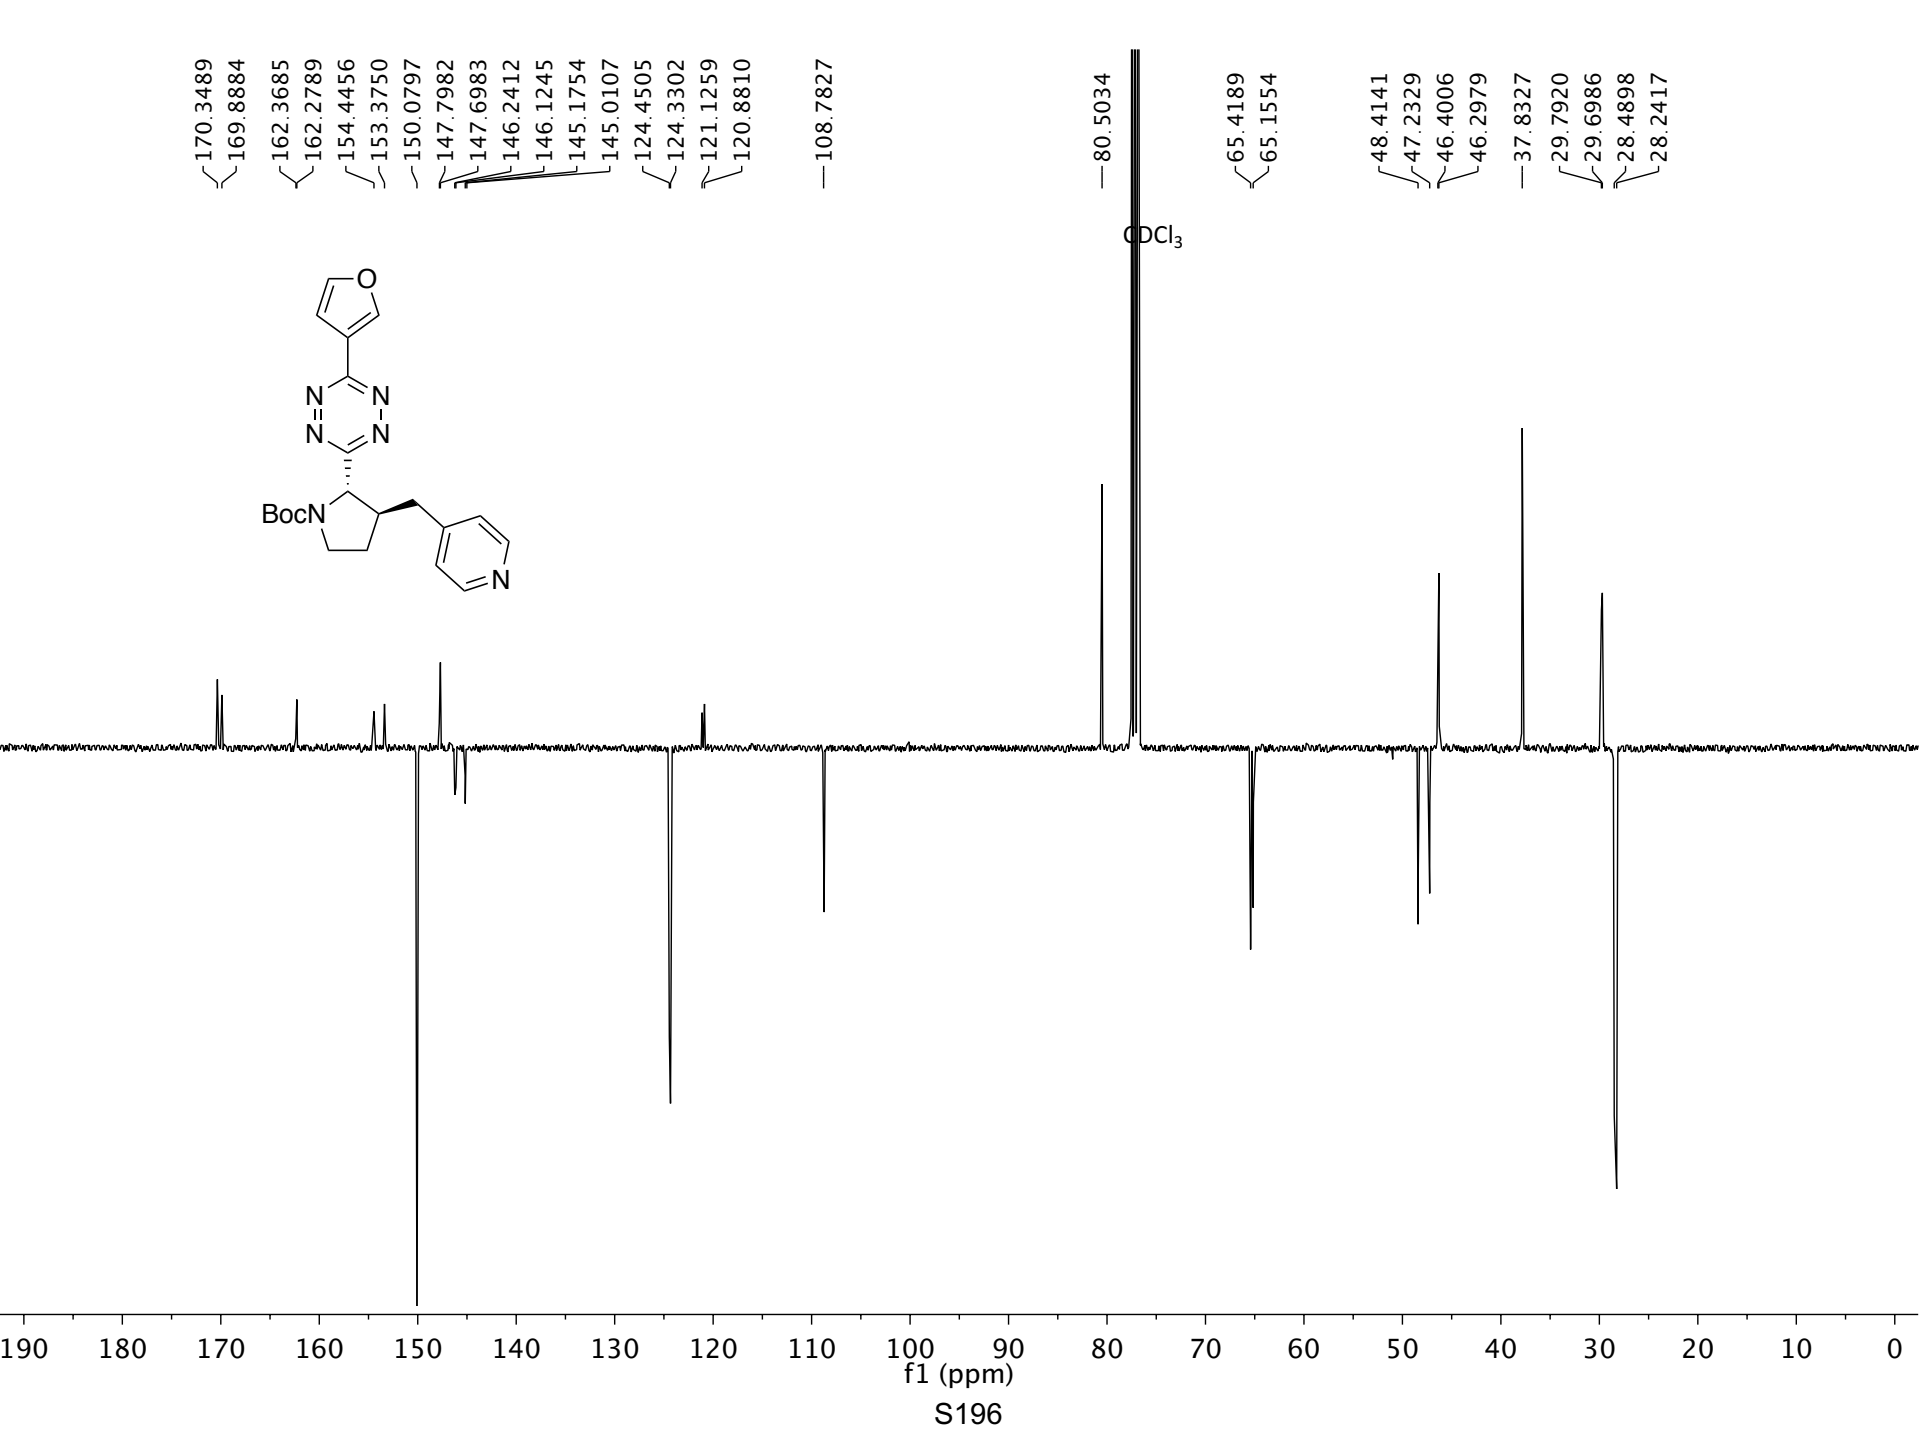

8.5074  
8.5051  
8.5032

7.6176  
7.6133  
7.6090

7.2250  
7.2229  
7.2202  
7.2183

3.7048  
3.6818  
3.6641  
3.6463

3.0980  
3.0803  
3.0625

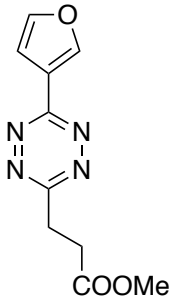

CDCl<sub>3</sub>

0.95

0.97

0.97

3.02

2.03

2.00

9.0 8.5 8.0 7.5 7.0 6.5 6.0 5.5 5.0 4.5 4.0 3.5 3.0 2.5 2.0 1.5 1.0 0.5 0.0

f1 (ppm)

S197

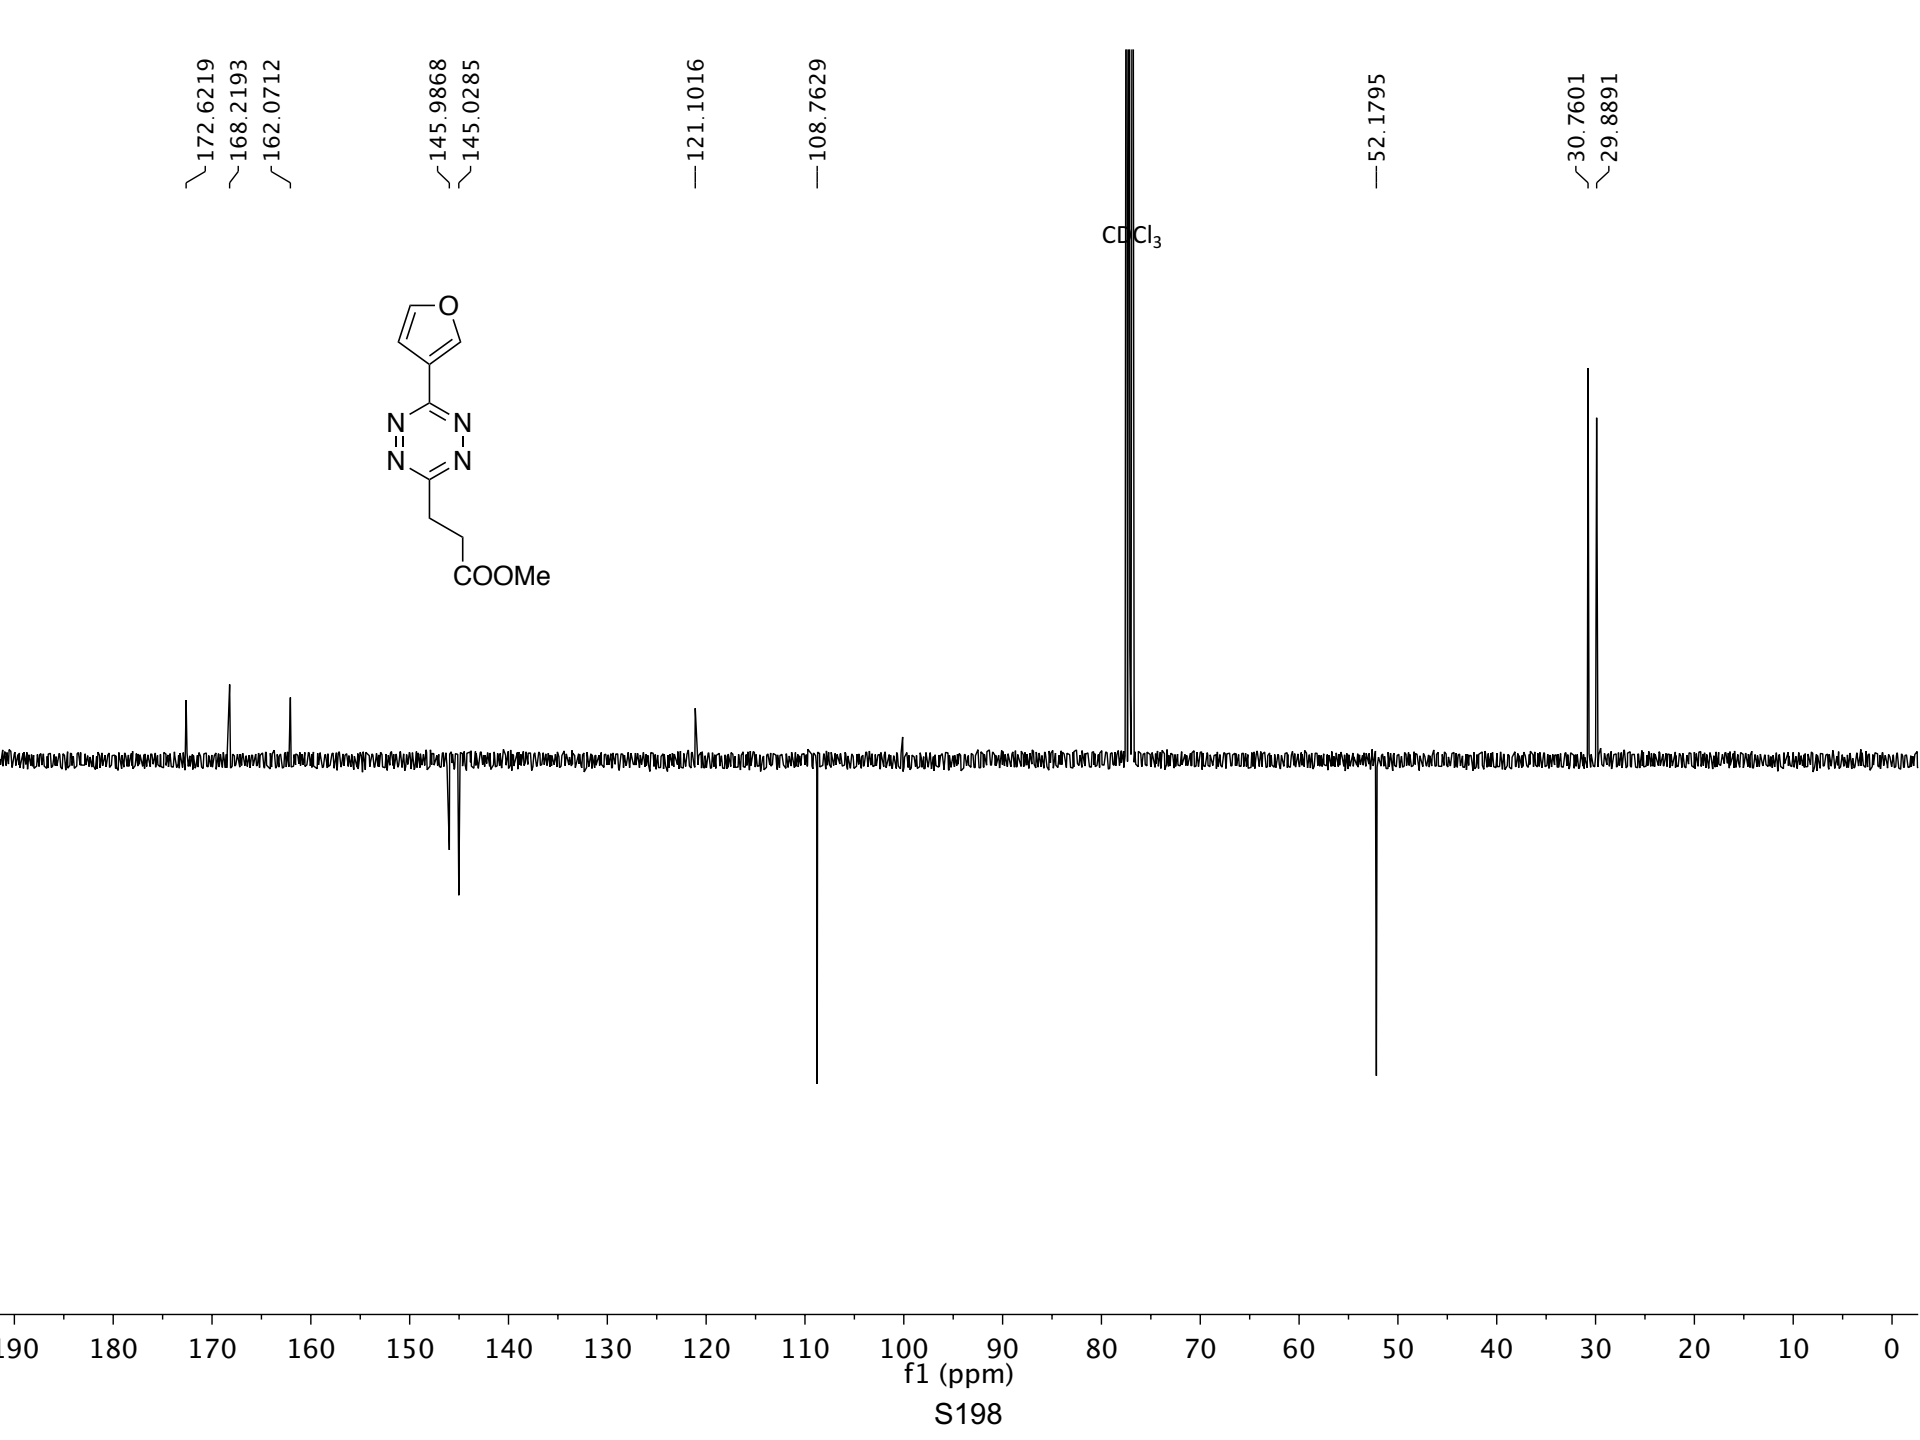

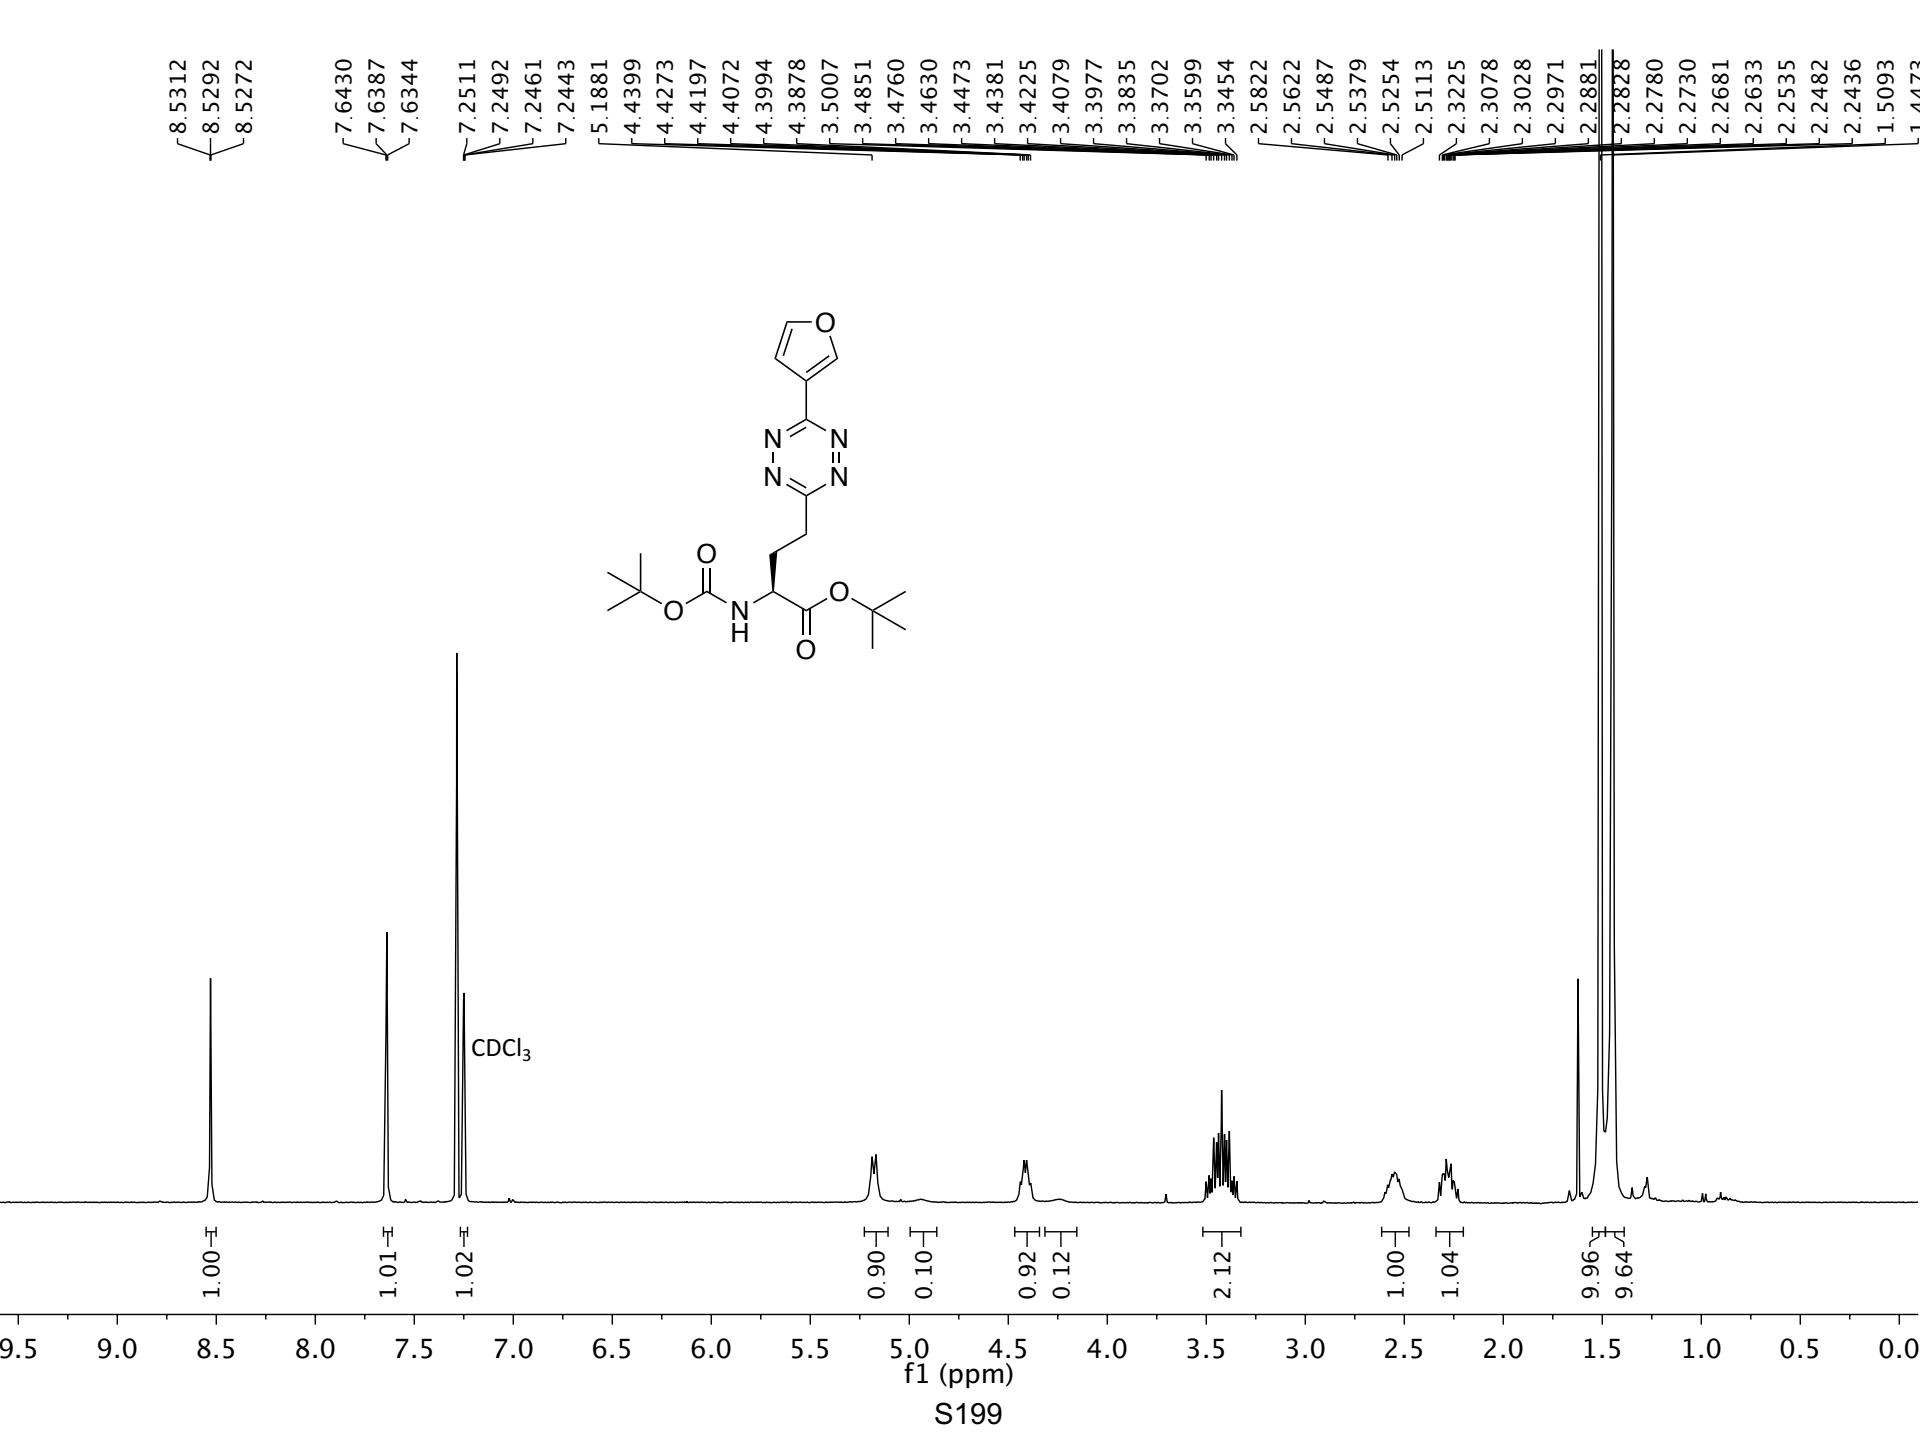

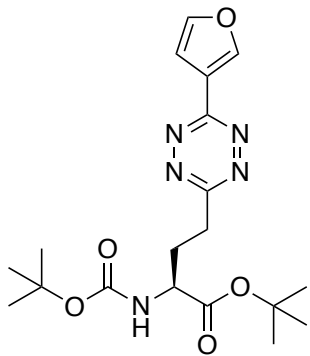

171.3262  
169.1234  
161.9500  
155.4419  
145.9325  
145.0203

121.1349

108.7579

82.6512  
80.0822

53.5713

31.2569  
31.1904  
29.8729  
28.4270  
28.1507

CDCl<sub>3</sub>

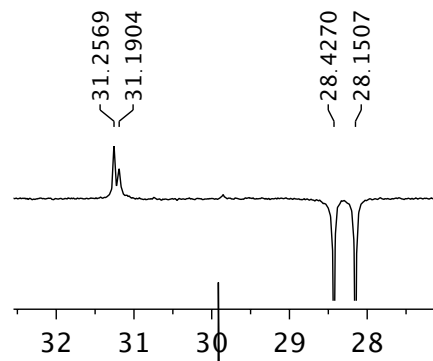

210 200 190 180 170 160 150 140 130 120 110 100 90 80 70 60 50 40 30 20 10 0 -10  
f1 (ppm)  
S200



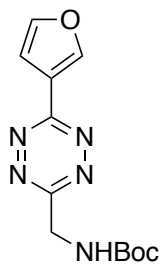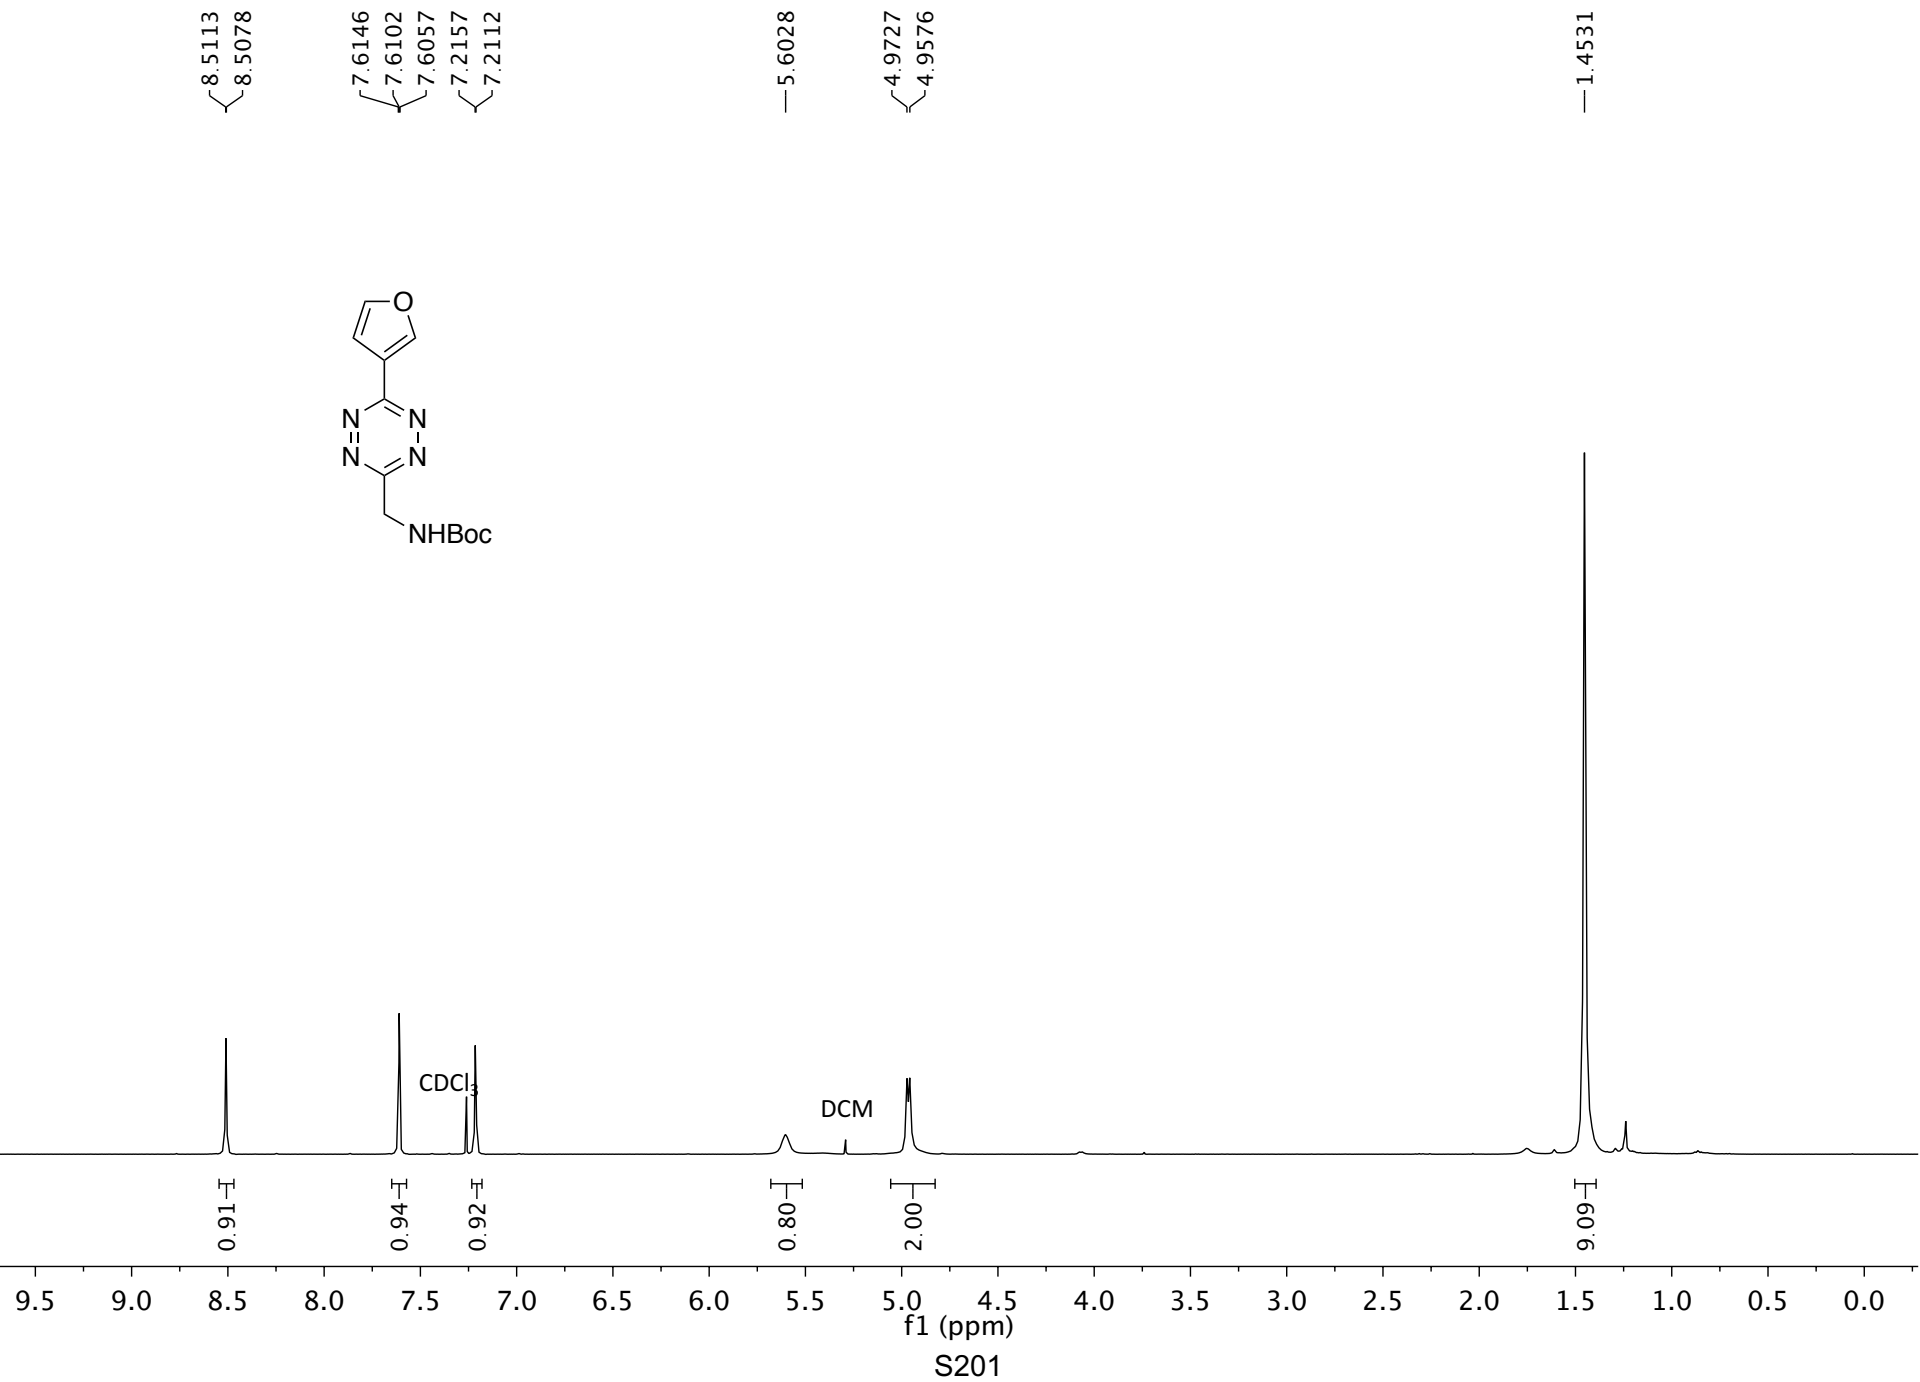

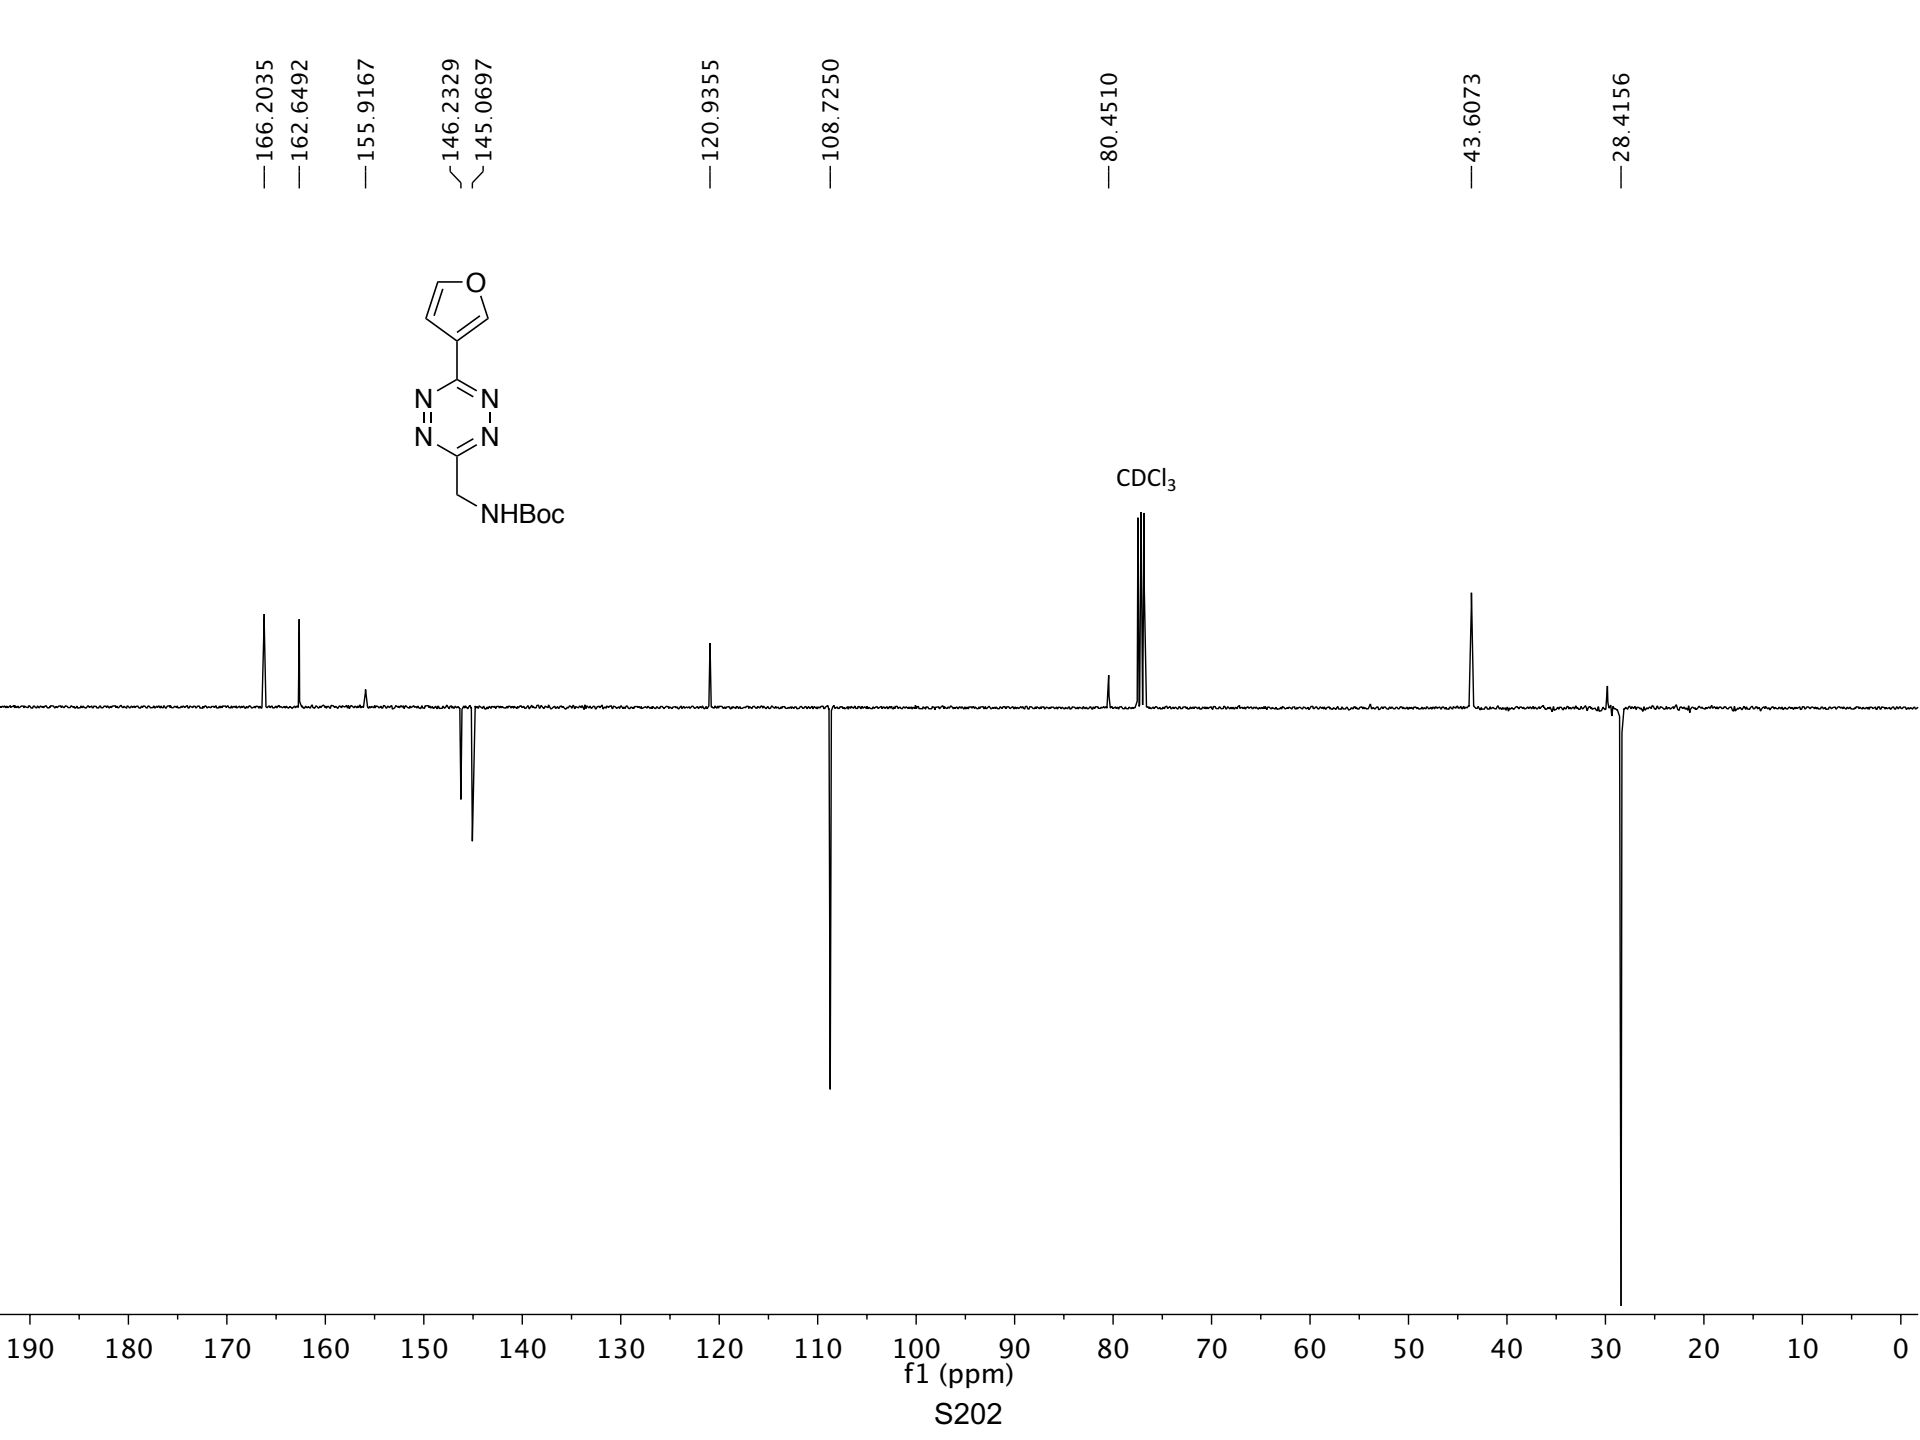

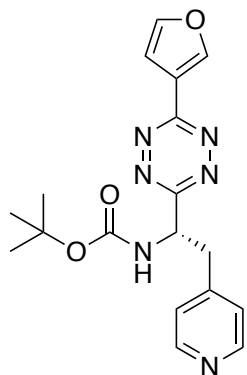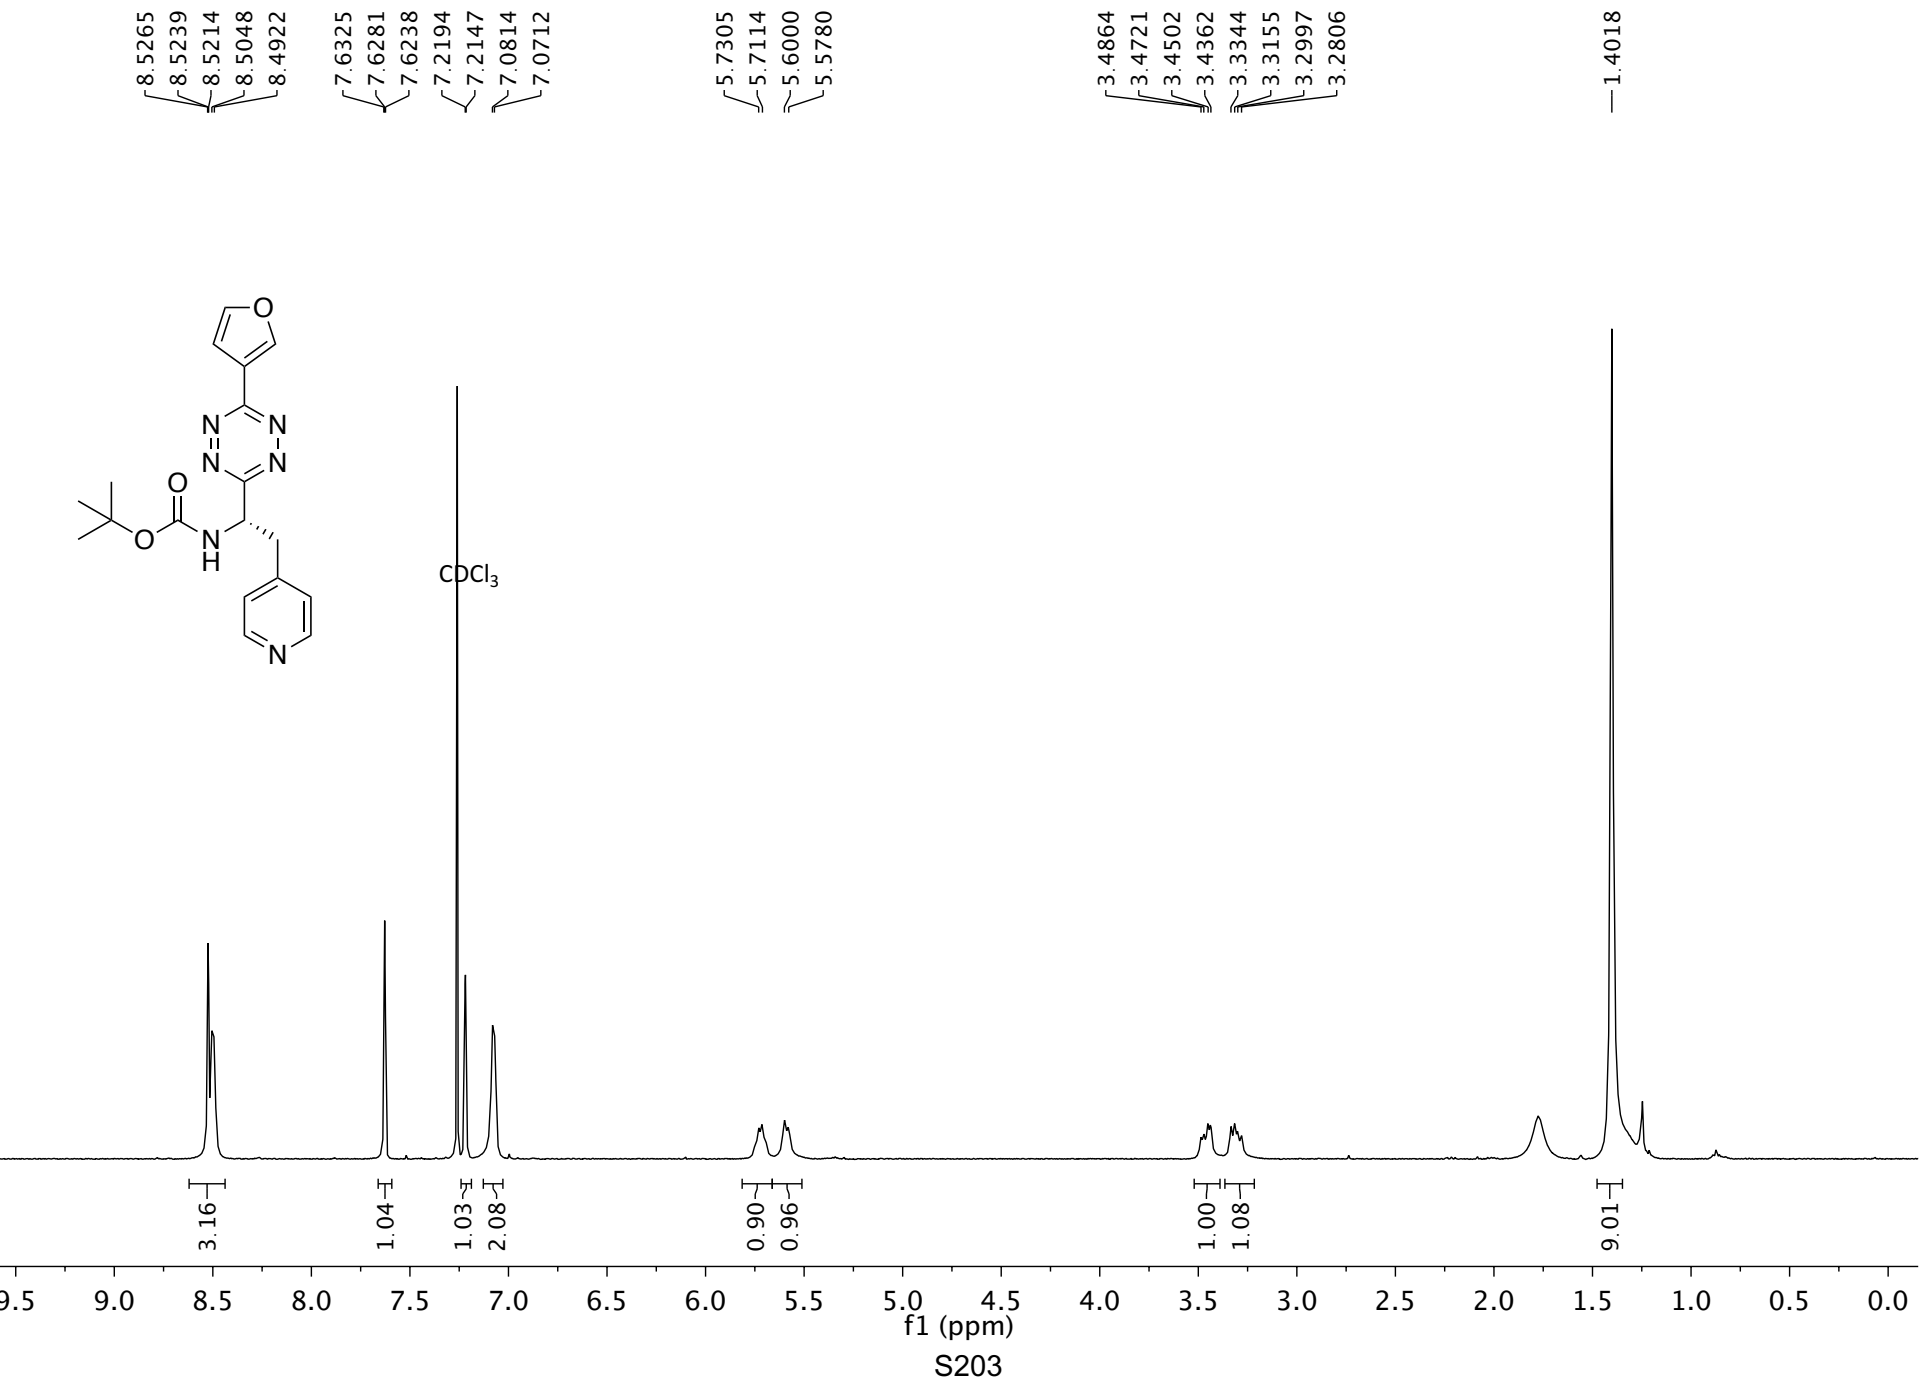

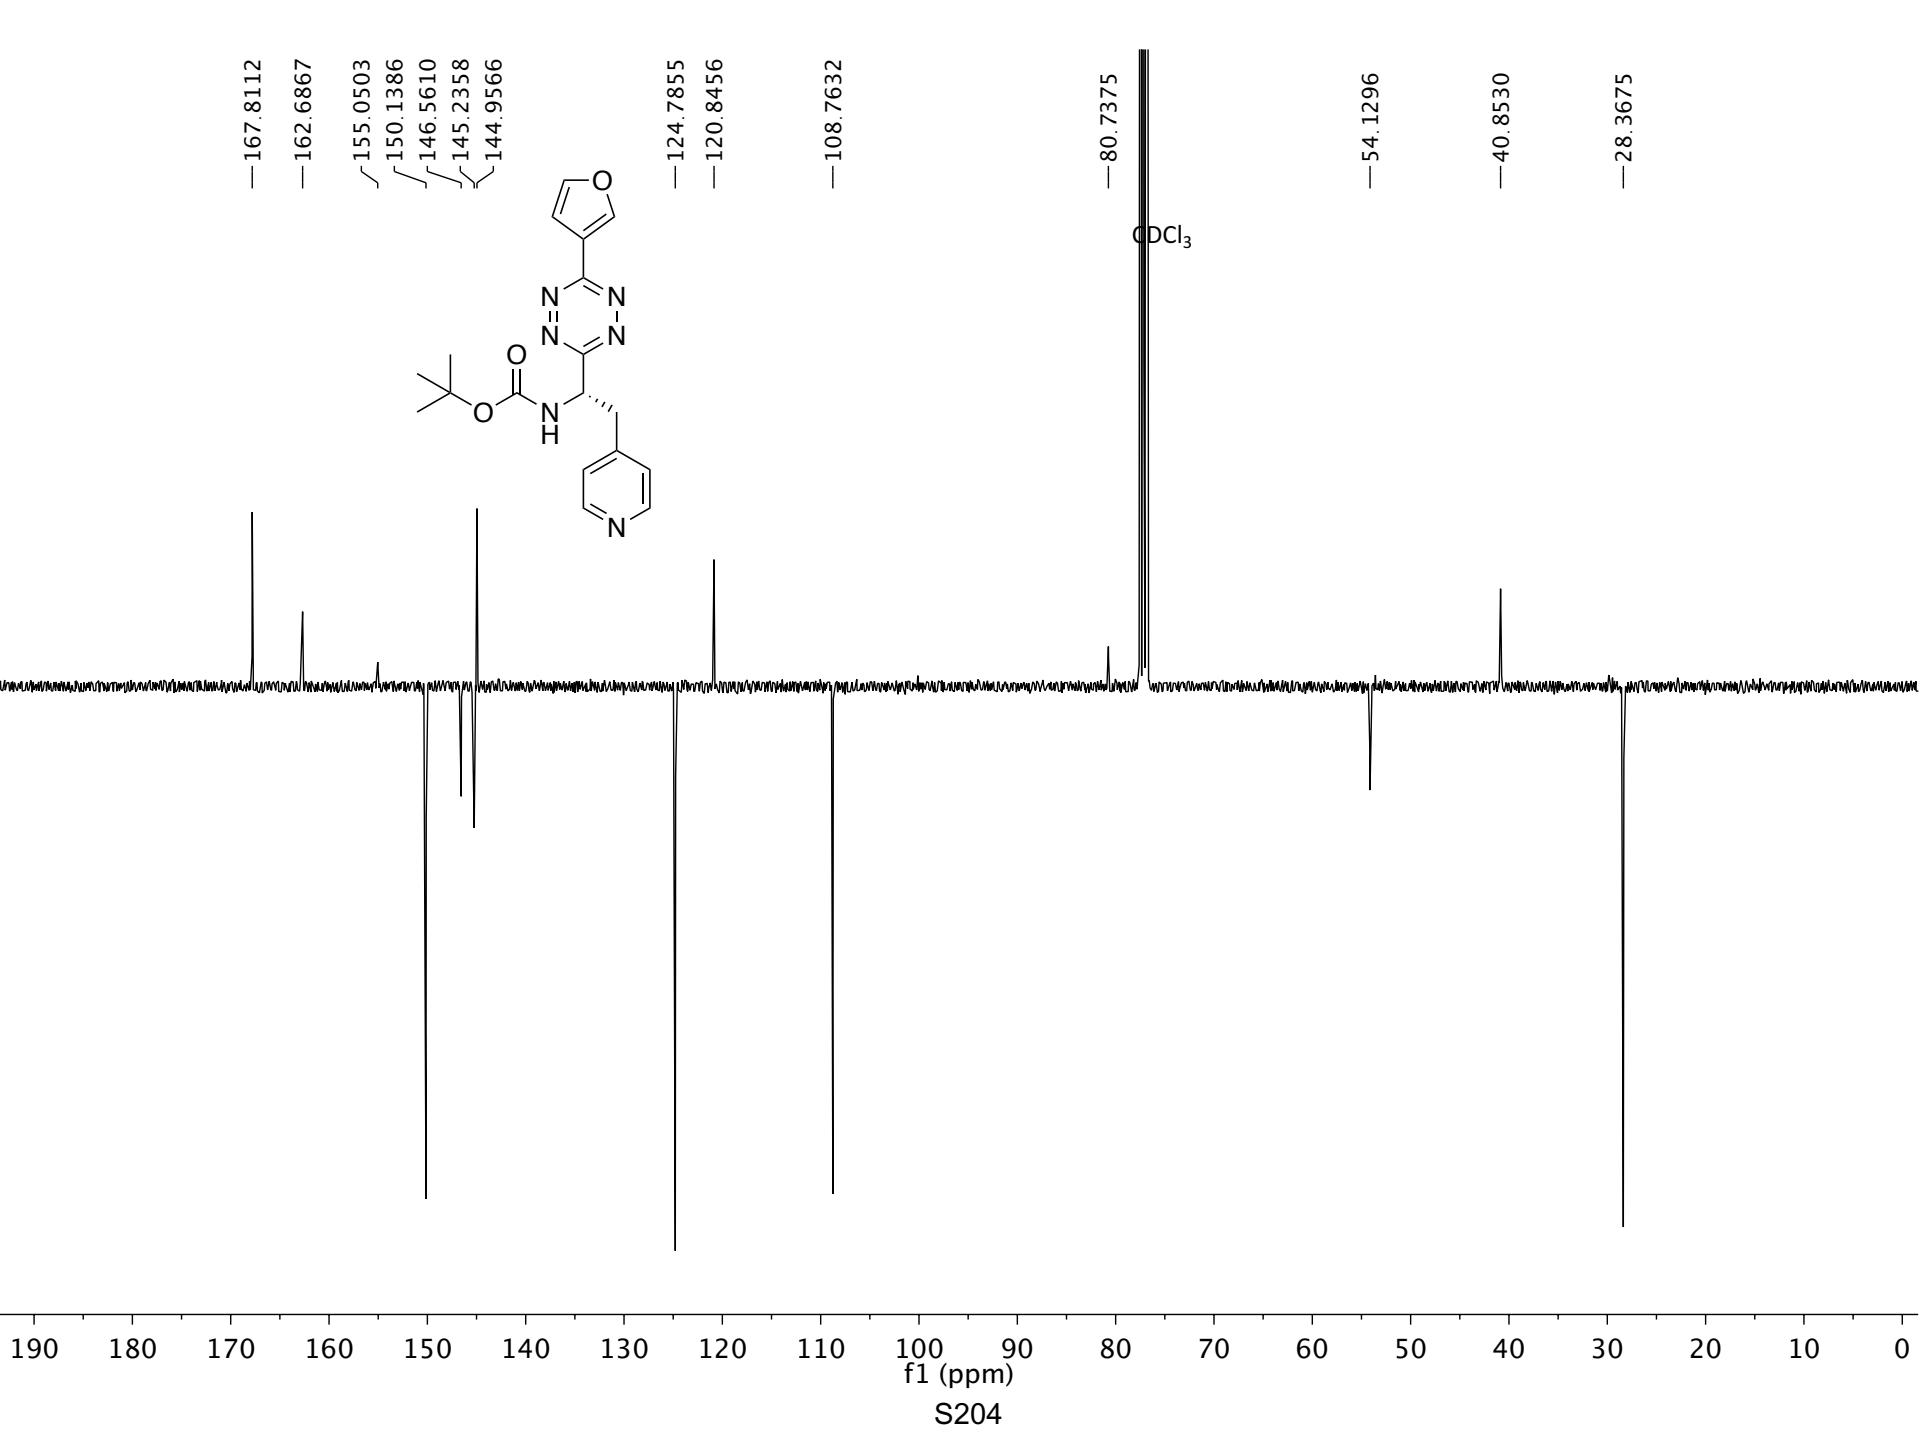

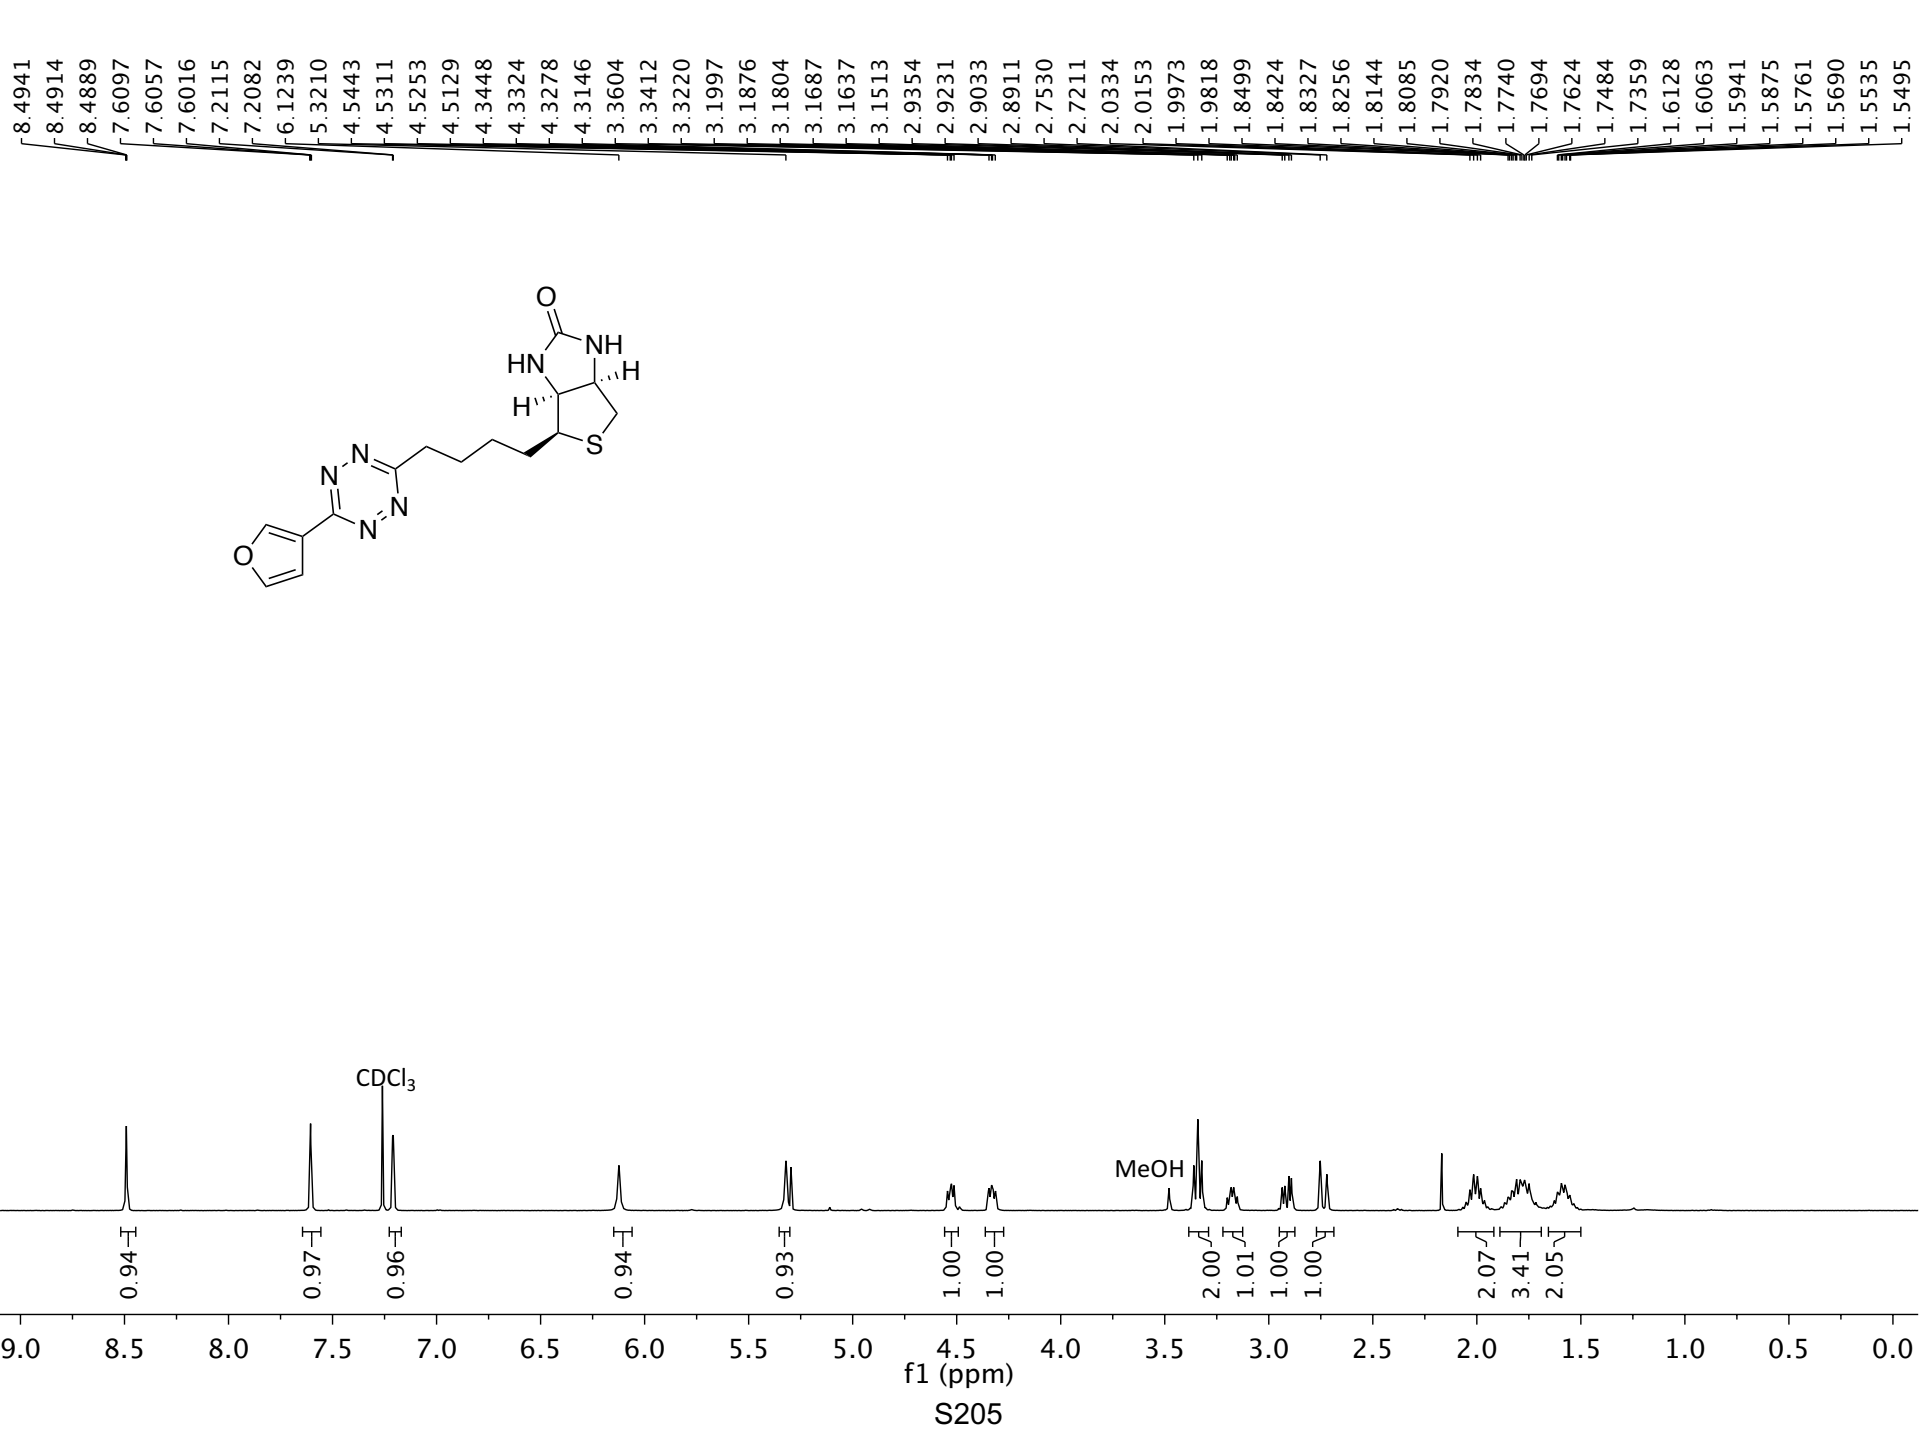

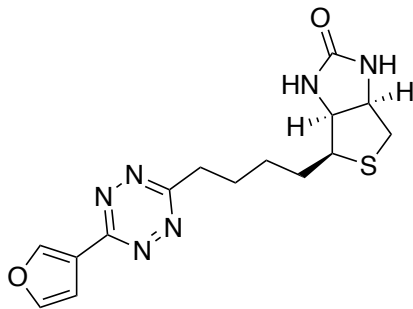

169.7103  
163.5995  
161.9454

145.8625  
144.9983

121.1333

108.7456

CDCl<sub>3</sub>

62.0115  
60.2312  
55.5634

40.6976  
34.4925  
28.4026  
28.3648  
28.3311

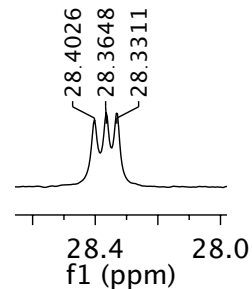

210 200 190 180 170 160 150 140 130 120 110 100 90 80 70 60 50 40 30 20 10 0 -10  
f1 (ppm)

S206

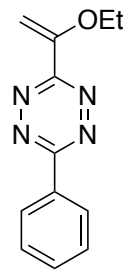

8.6526  
8.6462  
8.6426  
8.6384  
8.6316  
8.6263  
8.6217  
7.6664  
7.6628  
7.6591  
7.6546  
7.6441  
7.6371  
7.6316  
7.6275  
7.6224  
7.6202  
7.6164  
7.6084  
7.6057  
7.6016  
7.5978  
7.5899  
7.5854  
7.5799  
7.5586  
6.0282  
6.0210

4.9375  
4.9302

4.1743  
4.1569  
4.1393  
4.1220

1.5673  
1.5500  
1.5323

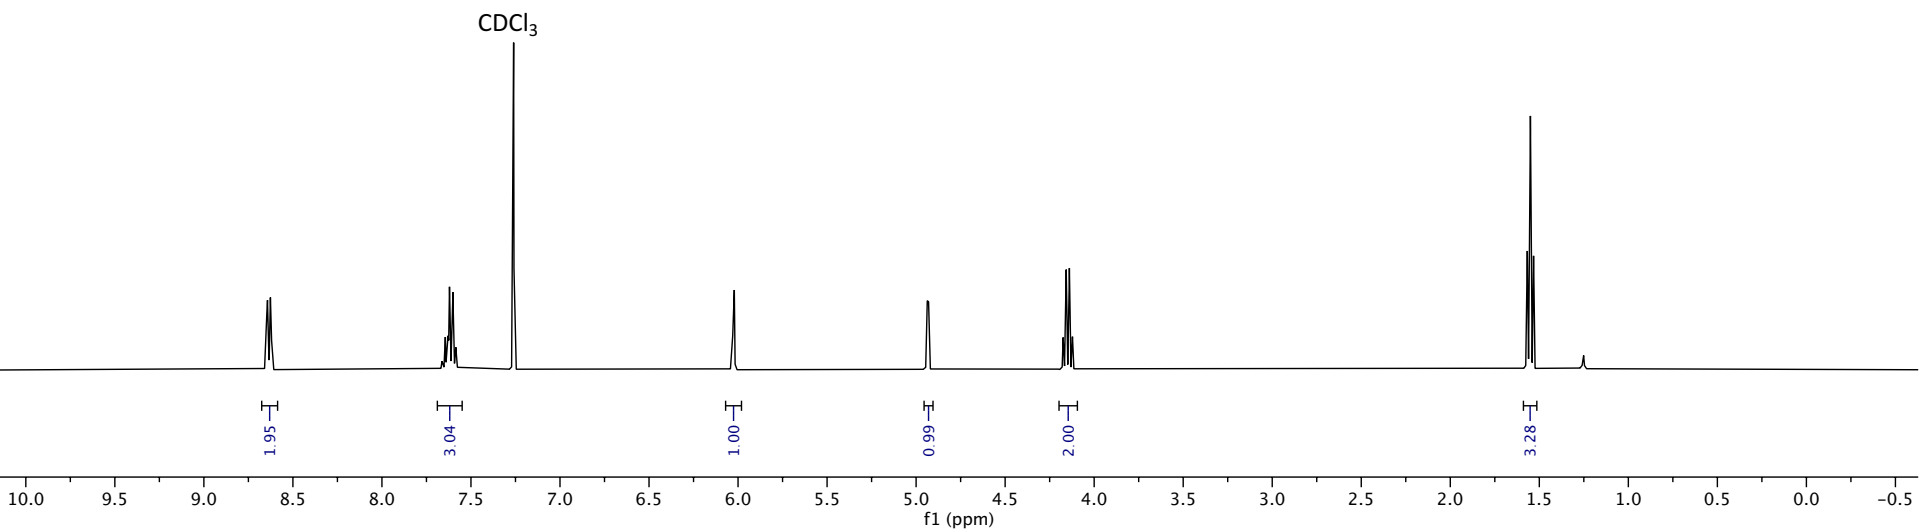

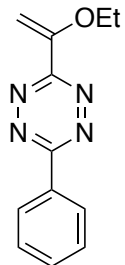

164.1589  
161.7882

153.7385

133.0012  
131.7407  
129.4500  
128.3053

93.1682

CDCl<sub>3</sub>

64.6745

14.5188

210 200 190 180 170 160 150 140 130 120 110 100 90 80 70 60 50 40 30 20 10 0 -10

f1 (ppm)

S208



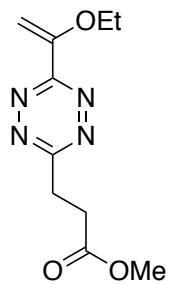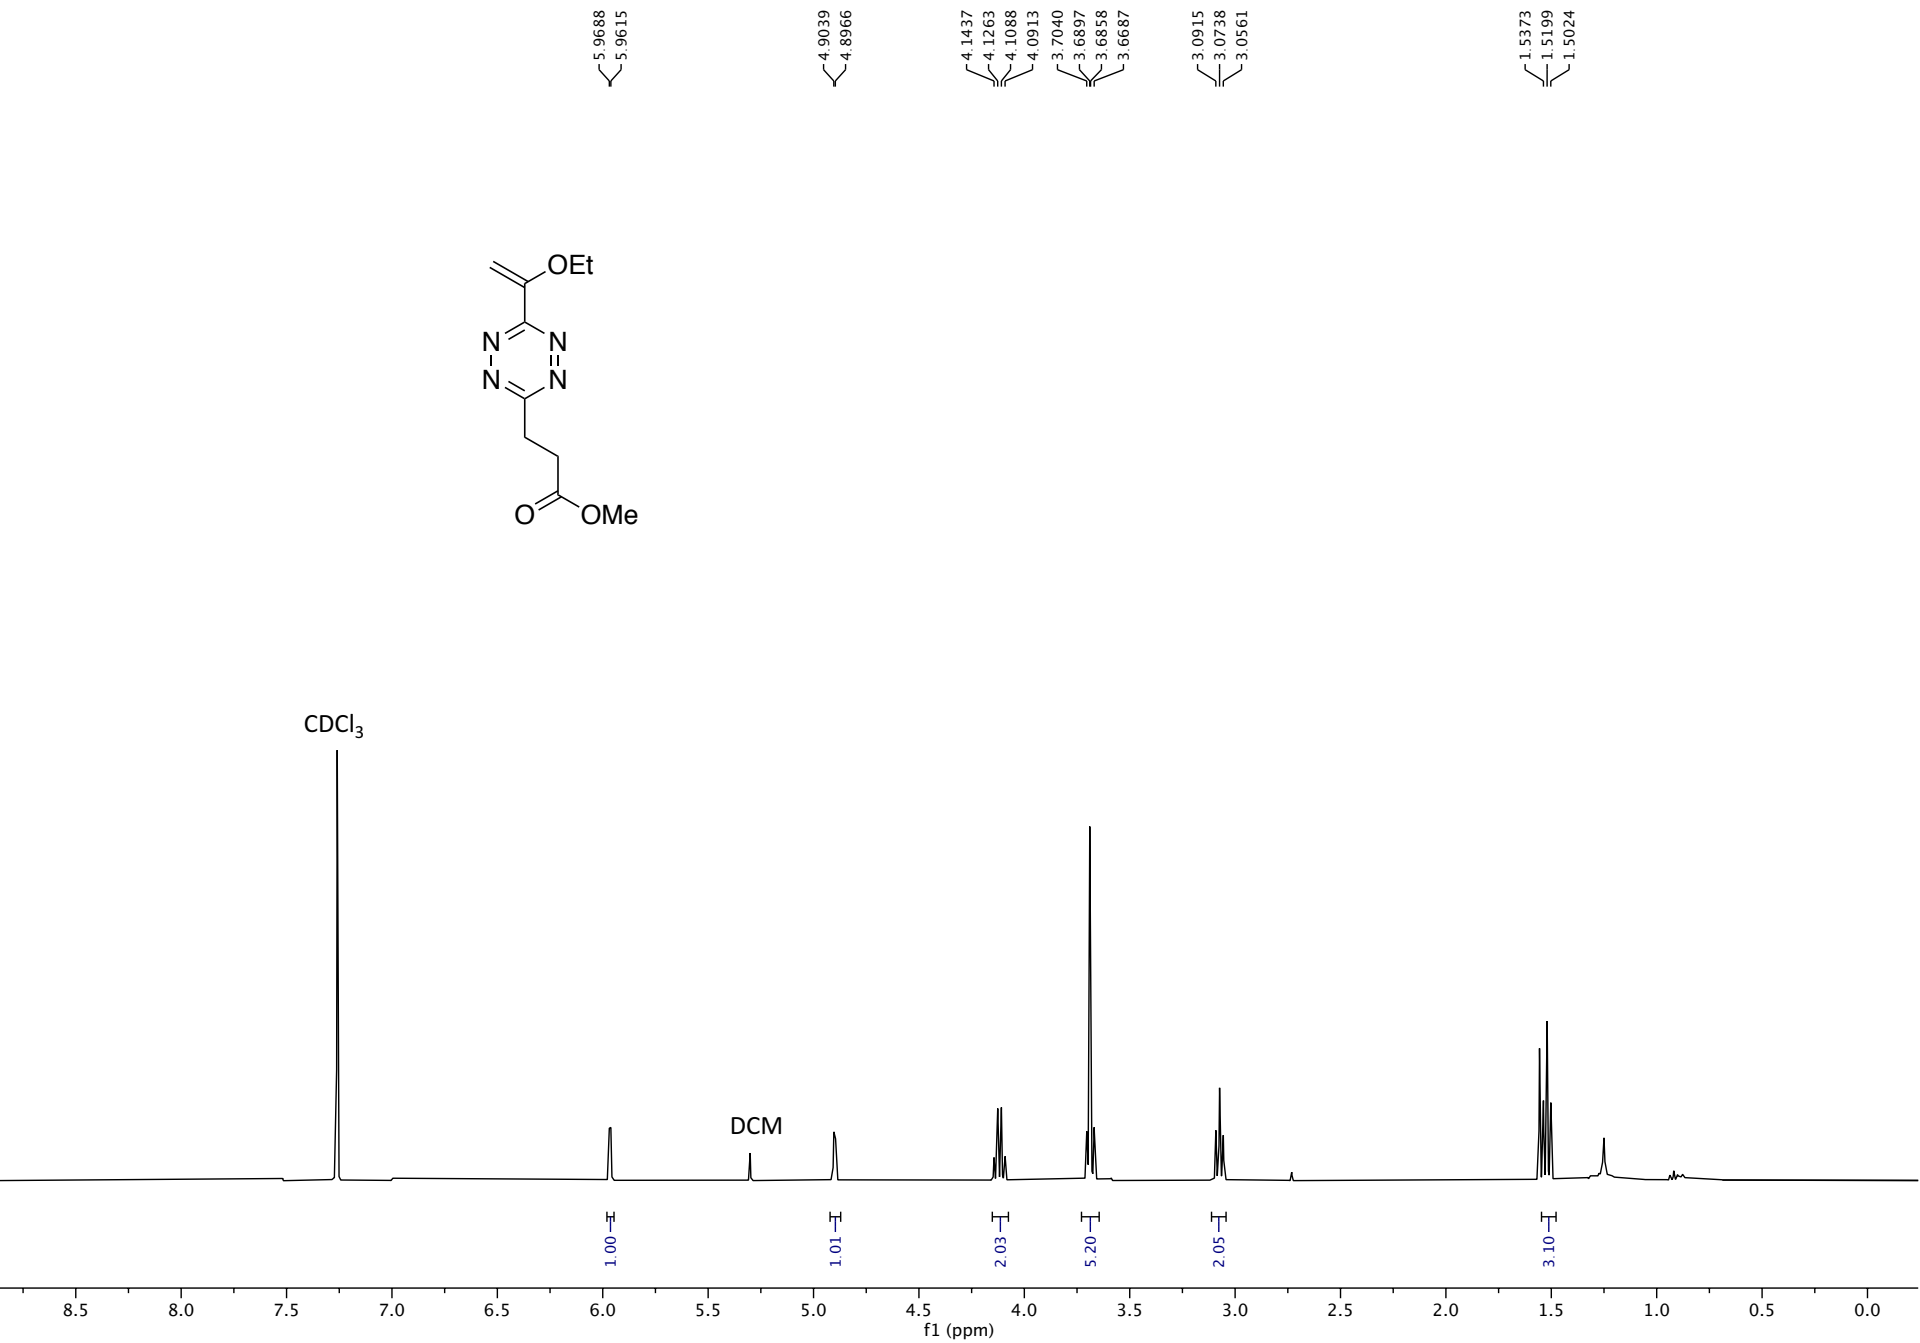

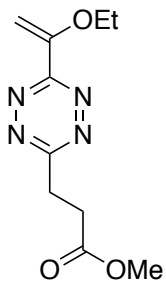

— 172.5161  
— 168.8447  
— 162.1270  
— 153.5699

— 93.1893

— 64.6456

— 52.1459

— 30.6647  
— 29.8410

— 14.4509

CDCl<sub>3</sub>

210 200 190 180 170 160 150 140 130 120 110 100 90 80 70 60 50 40 30 20 10 0 -10

f1 (ppm)

S210

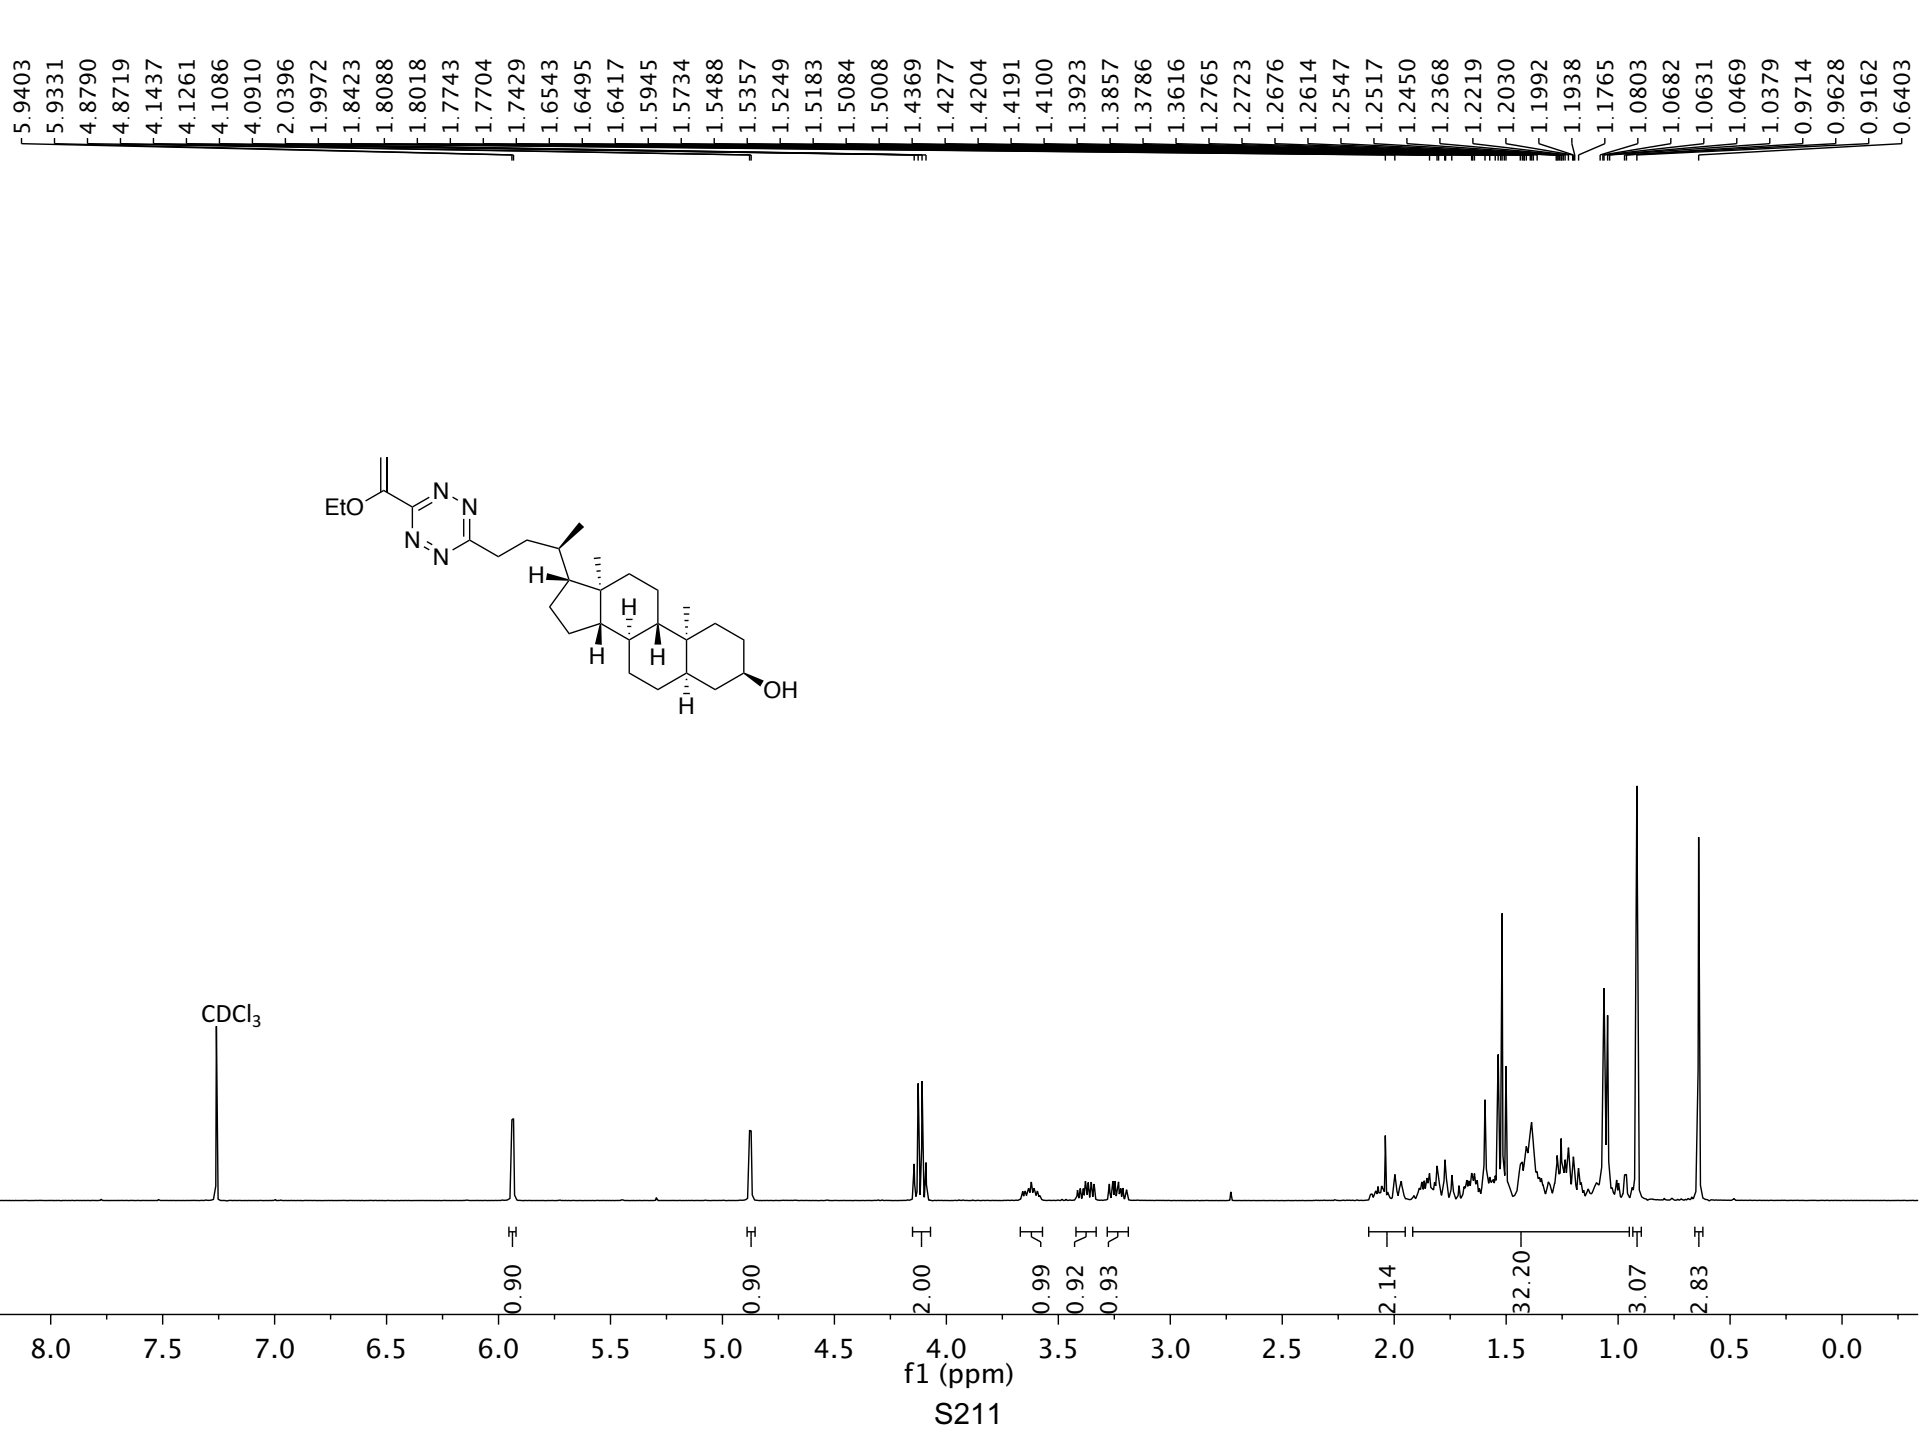

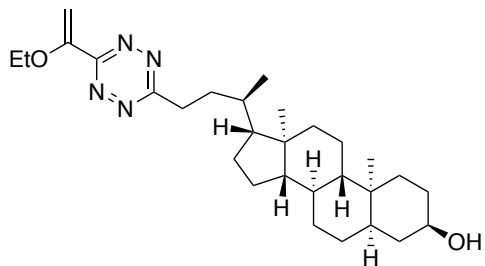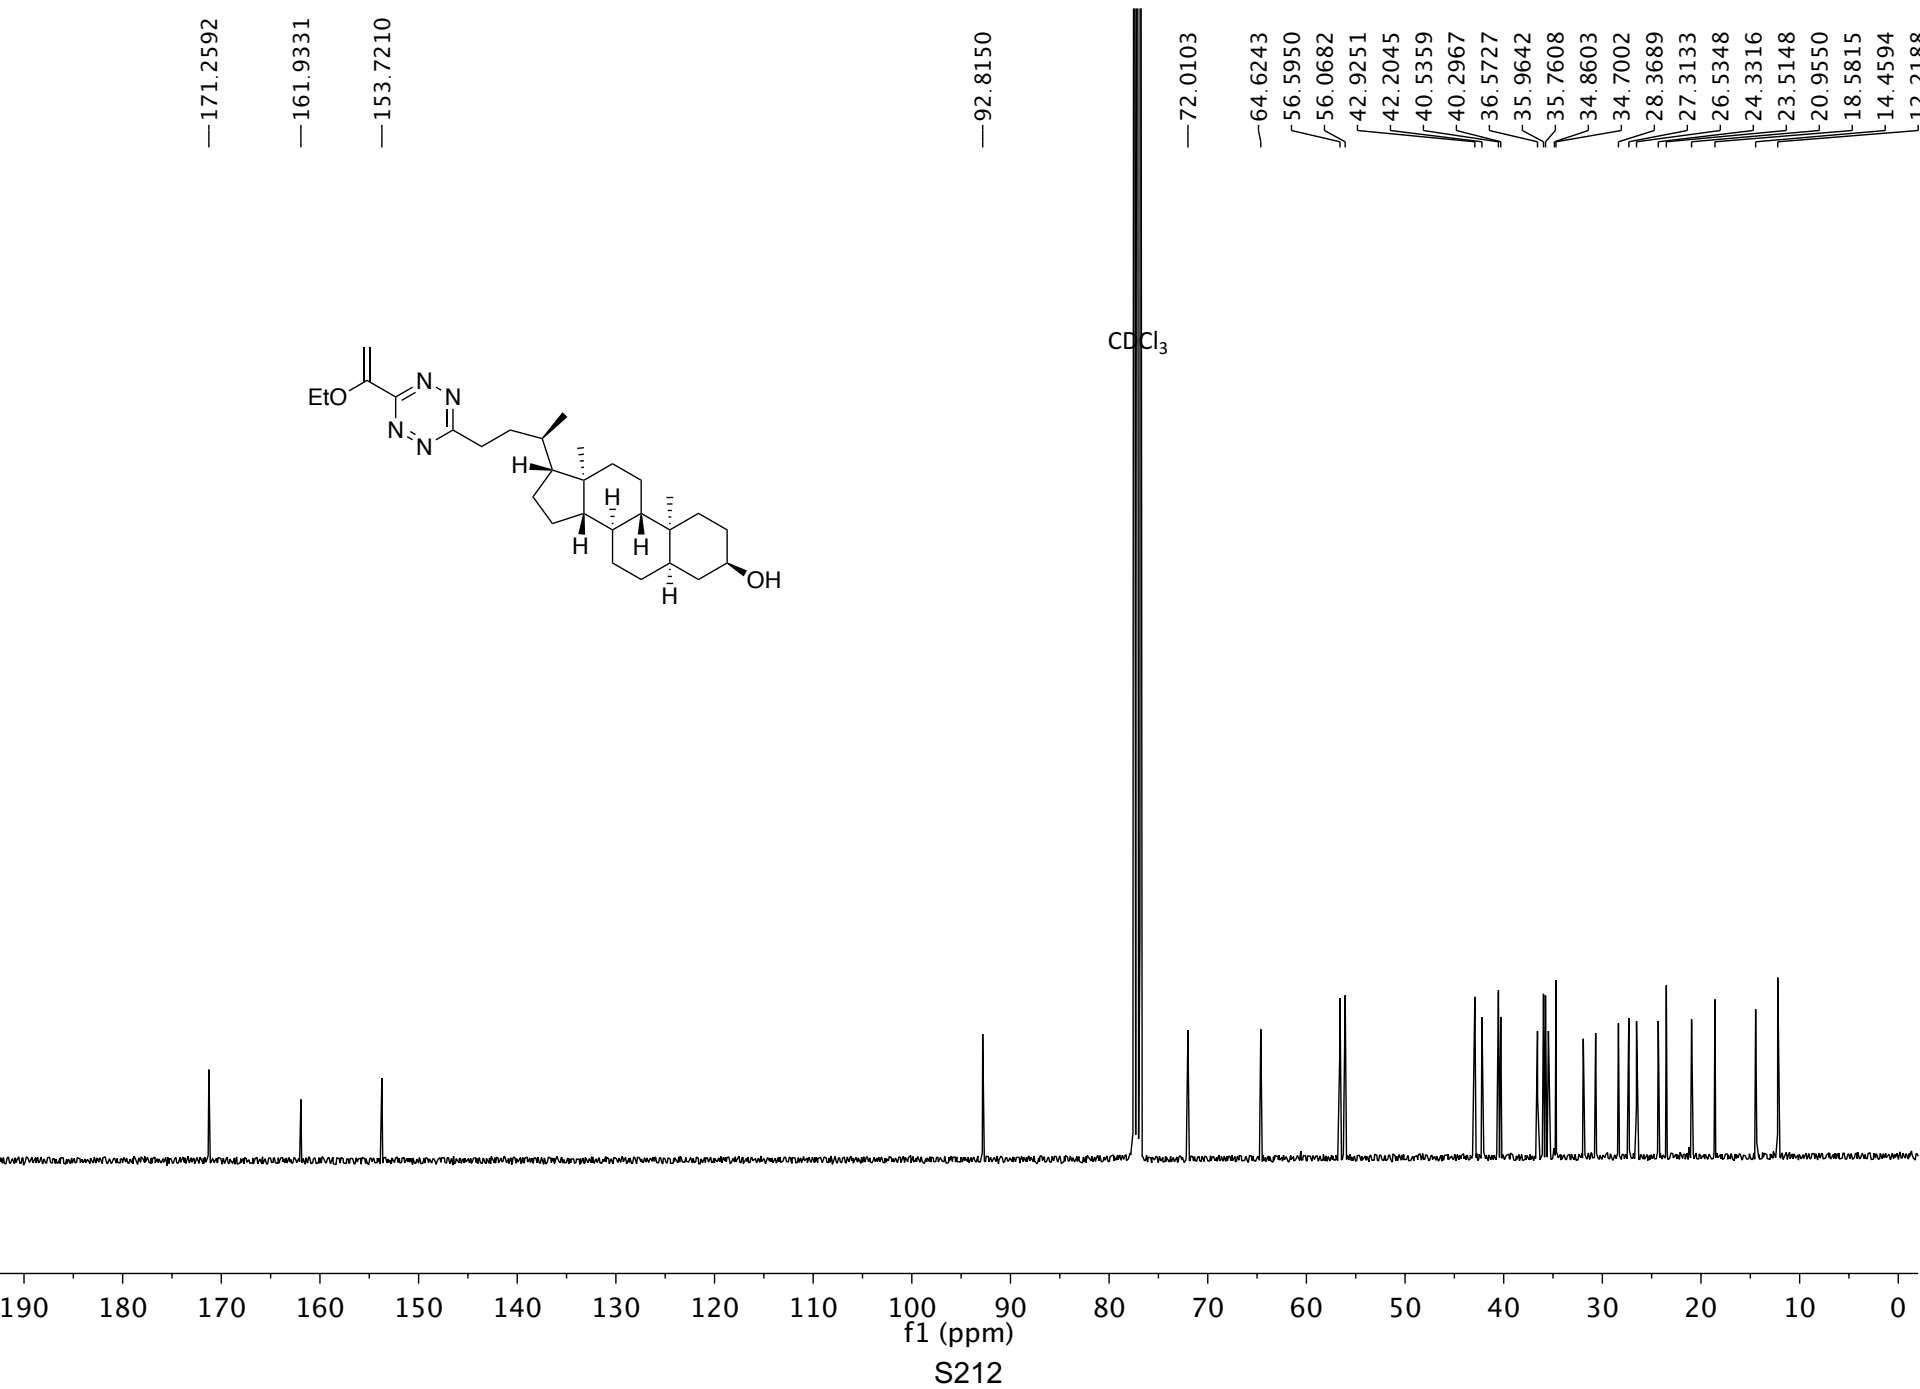

7.7283  
7.4925  
7.4838  
7.4755  
7.4663  
7.4538  
7.4455

6.0089  
6.0016

4.9355  
4.9281  
4.7587

4.1509  
4.1334  
4.1159  
4.0985

1.5422  
1.5248  
1.5074

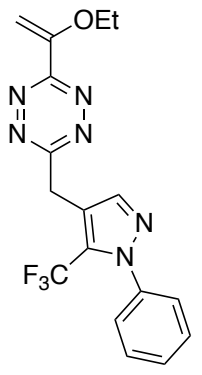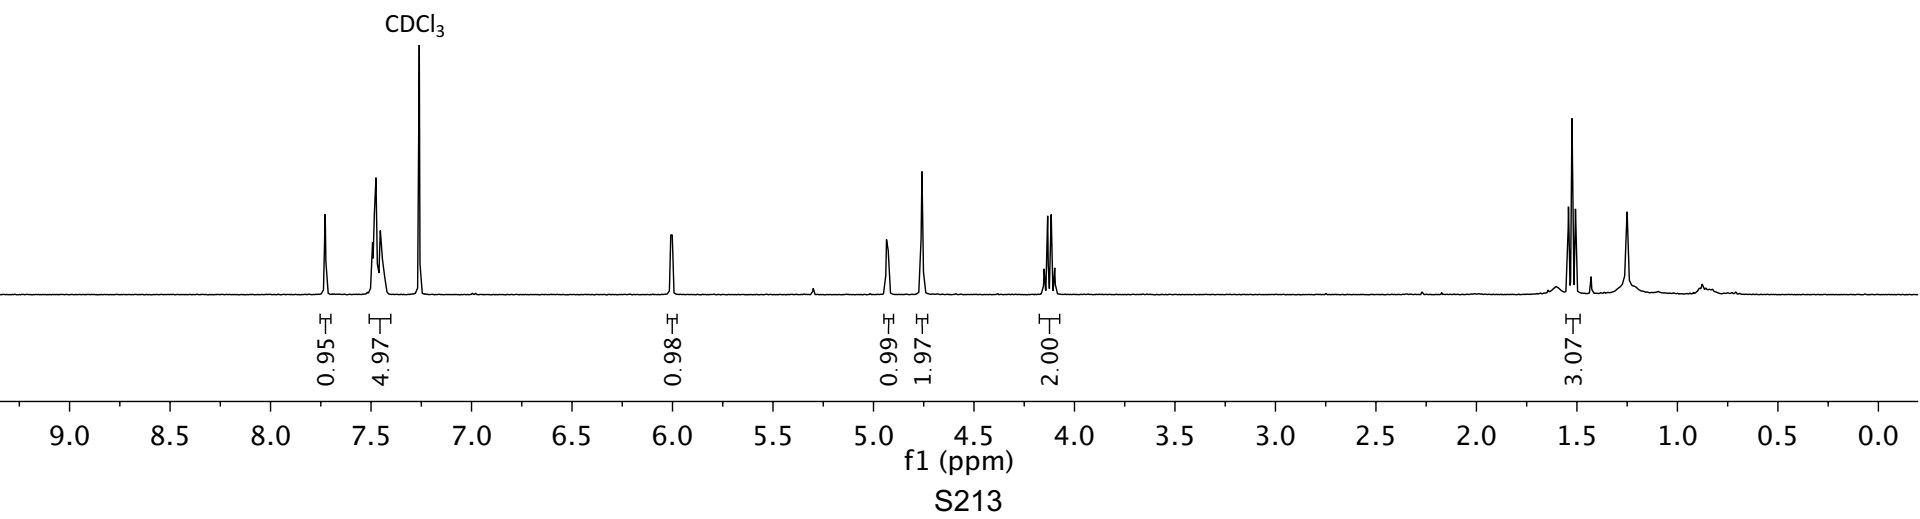

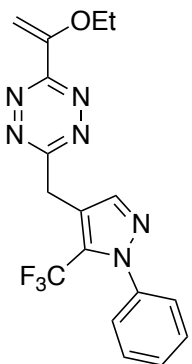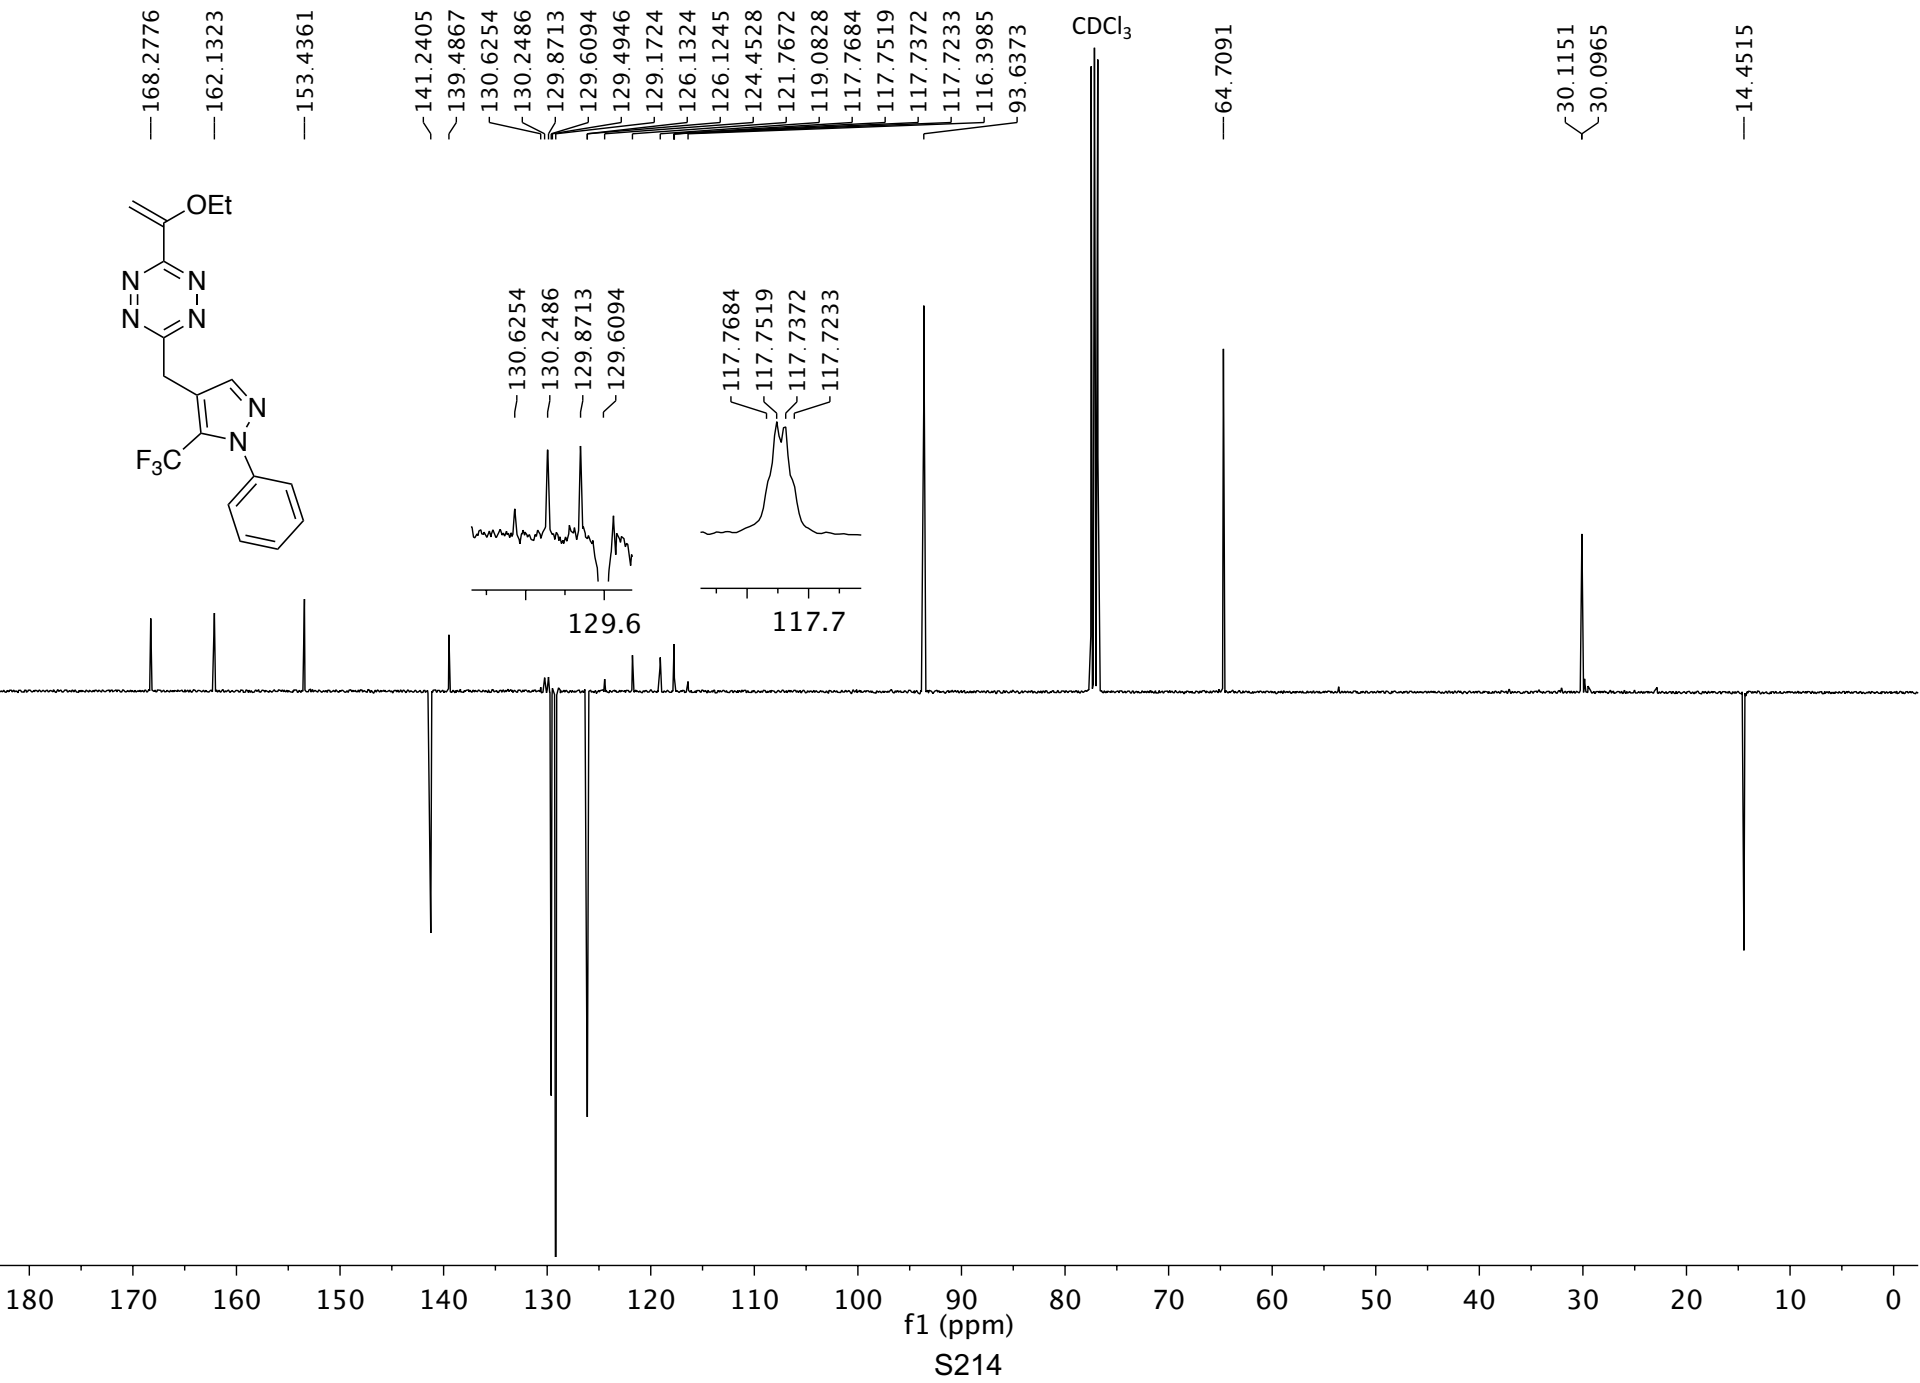

CDCl<sub>3</sub>

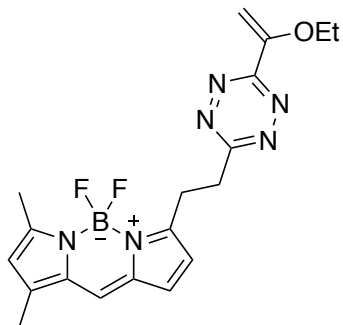

7.0775  
6.8528  
6.8461

6.2405  
6.2338  
6.1142  
5.9513  
5.9464

4.8880  
4.8831

4.1346  
4.1230  
4.1113  
4.0997

3.8222  
3.8100  
3.8077

3.7969  
3.6691  
3.6563  
3.6438

2.5551

2.2511

1.5299  
1.5183  
1.5066

1.00

1.00

0.97

0.95

1.01

1.02

2.01

2.02

2.07

3.02

3.08

3.31

f1 (ppm)

S215

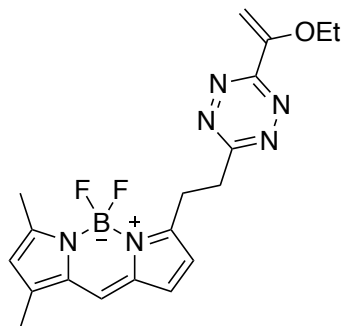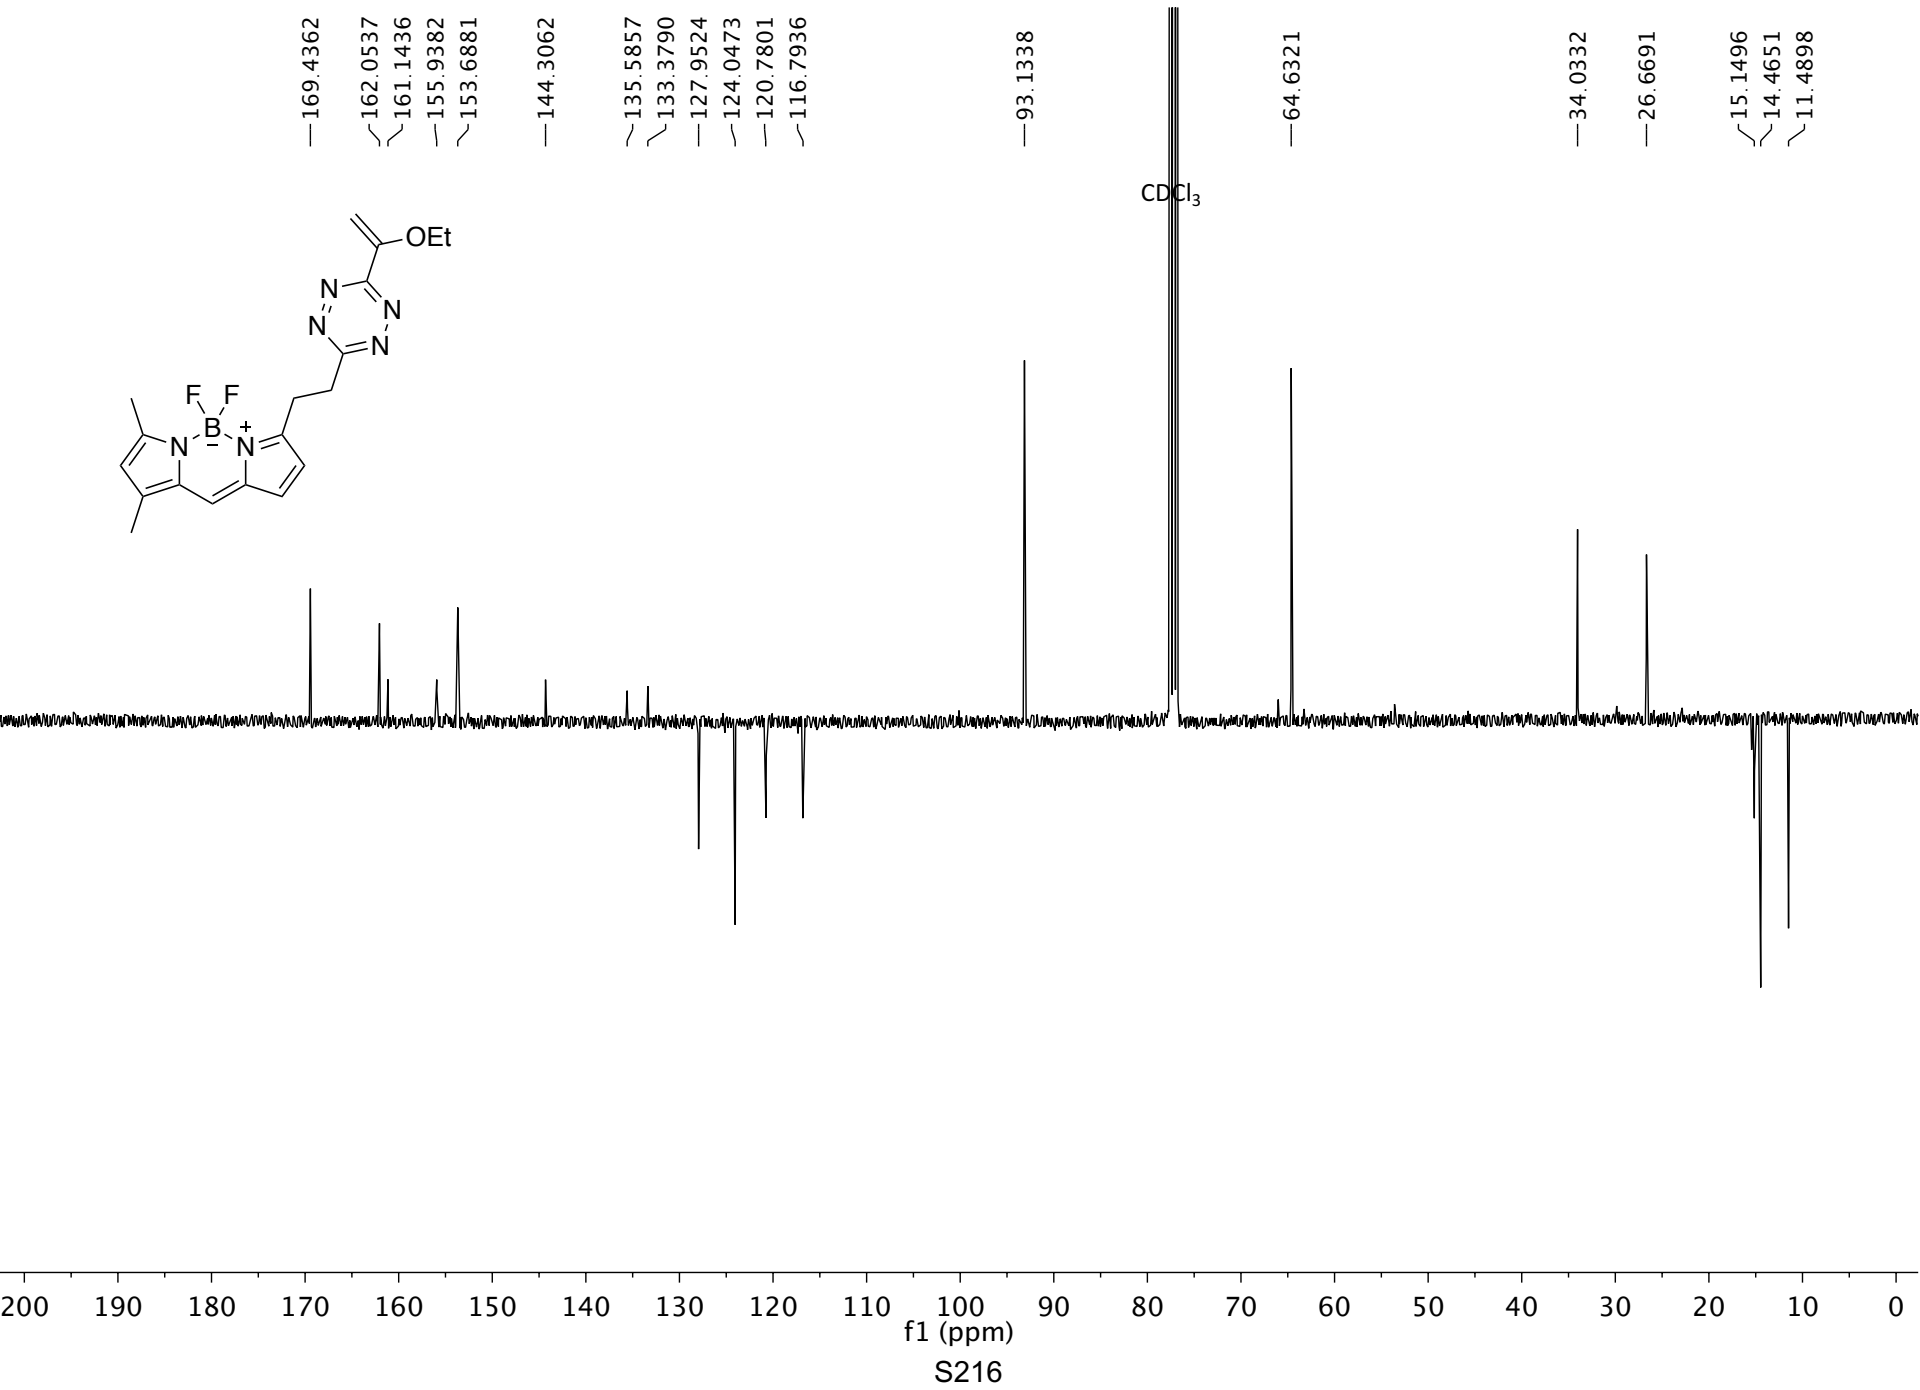



8.1995  
8.1779  
7.9336  
7.9123

5.7755  
5.7599  
5.7443  
5.7288  
5.7202  
5.7131  
5.6975  
5.6820

4.5713  
4.5548  
4.5384  
4.1967  
4.1598  
4.1482  
4.1295  
4.1123  
3.9686

2.9016  
2.8850  
2.8688  
2.8471  
2.8173  
2.7852  
1.7834  
1.7484  
1.7230  
1.7140  
1.7051  
1.6958  
1.6857  
1.6767  
1.1623  
1.1307  
1.0981

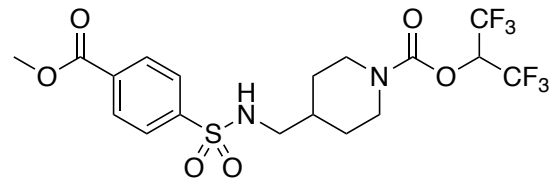

2.01  
2.08

1.00

0.96

2.27  
3.08

4.13

3.15

2.13

10.0 9.5 9.0 8.5 8.0 7.5 7.0 6.5 6.0 5.5 5.0 4.5 4.0 3.5 3.0 2.5 2.0 1.5 1.0 0.5 0.0 -0.5

f1 (ppm)

S217

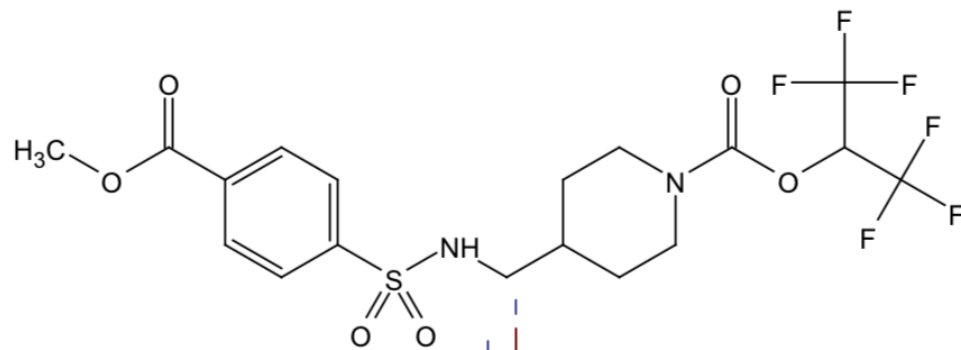

—165.65

—151.02

—145.18

—133.25

—130.48

—127.30

—126.98

—125.54

—122.75

—119.93

—117.12

68.34

68.01

67.68

67.35

67.02

—52.97

—47.91

—44.19

—39.97

—35.76

—29.47

—29.10

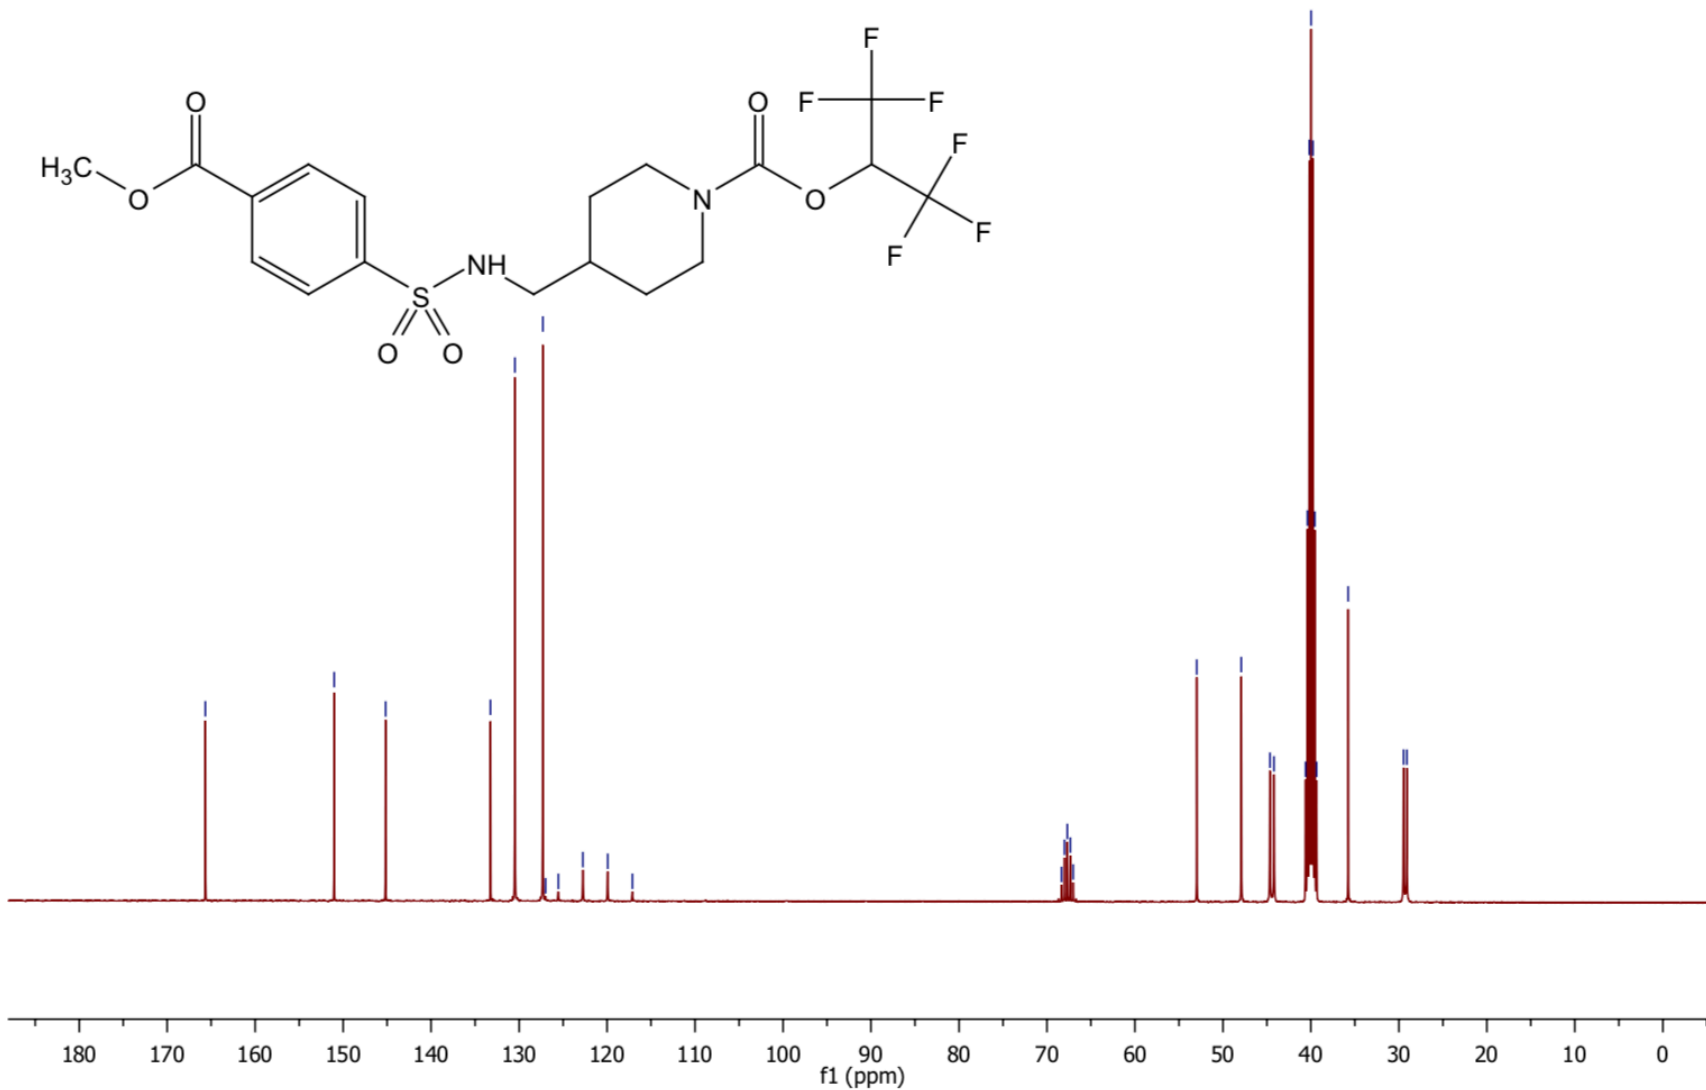

— 13.3951

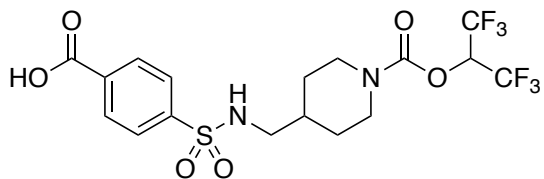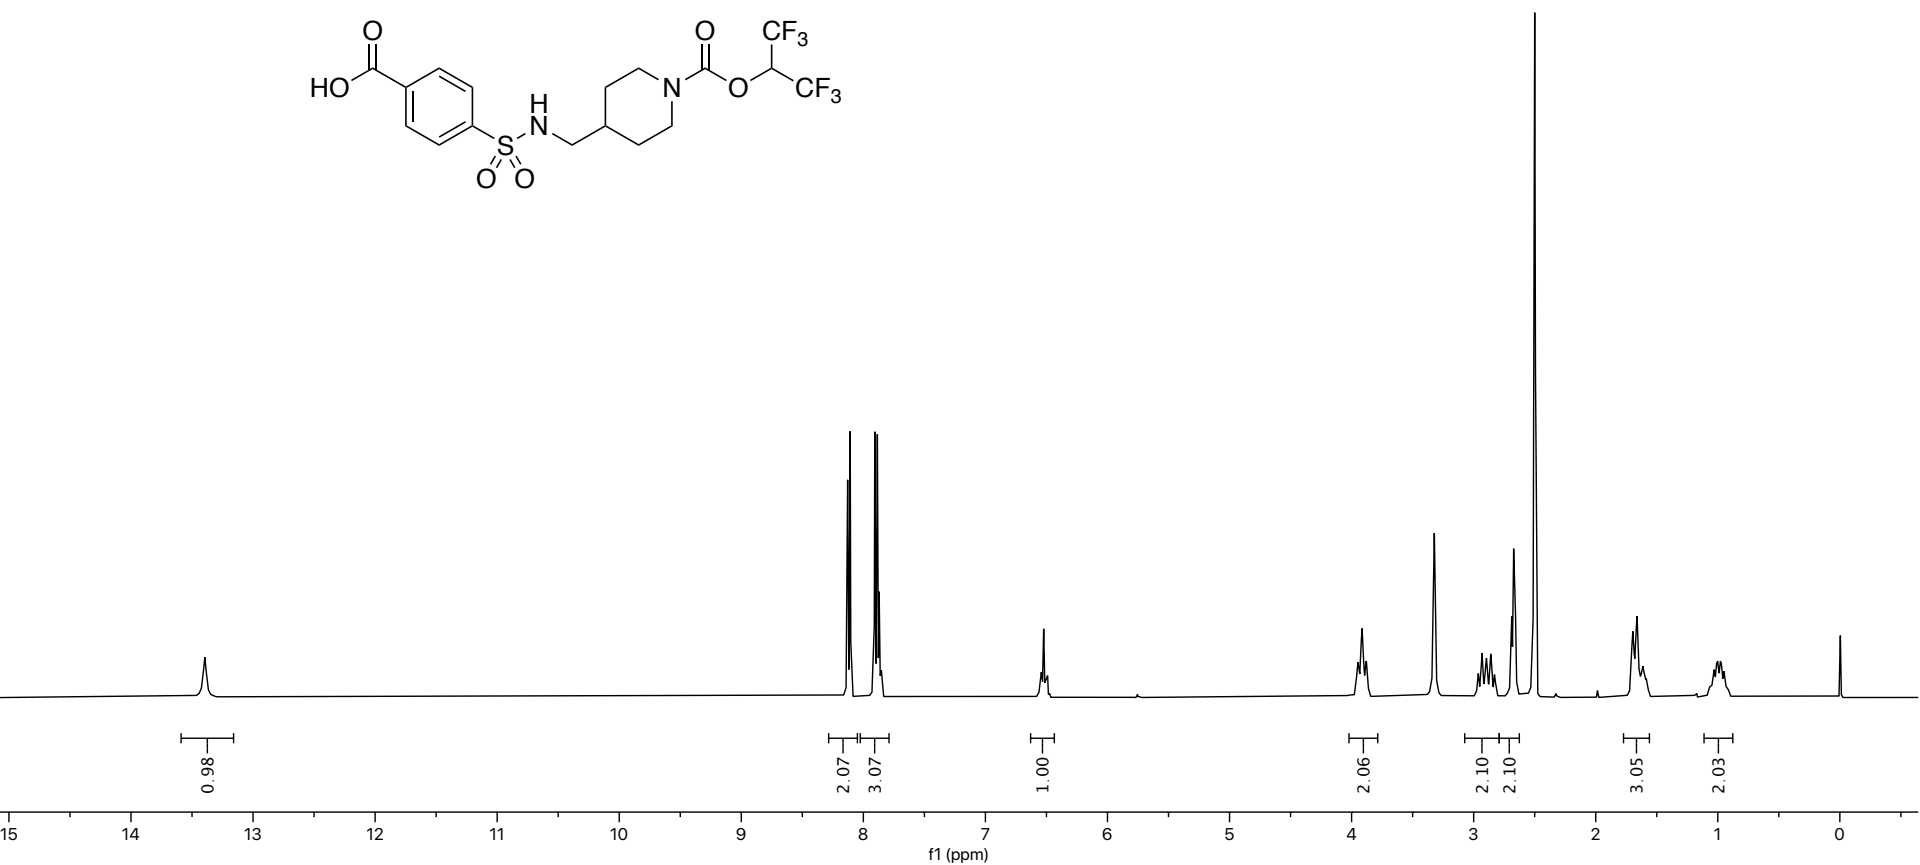

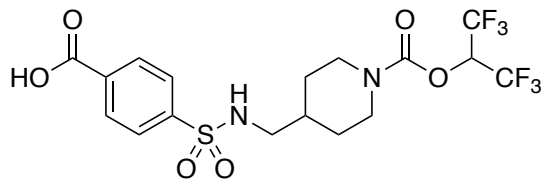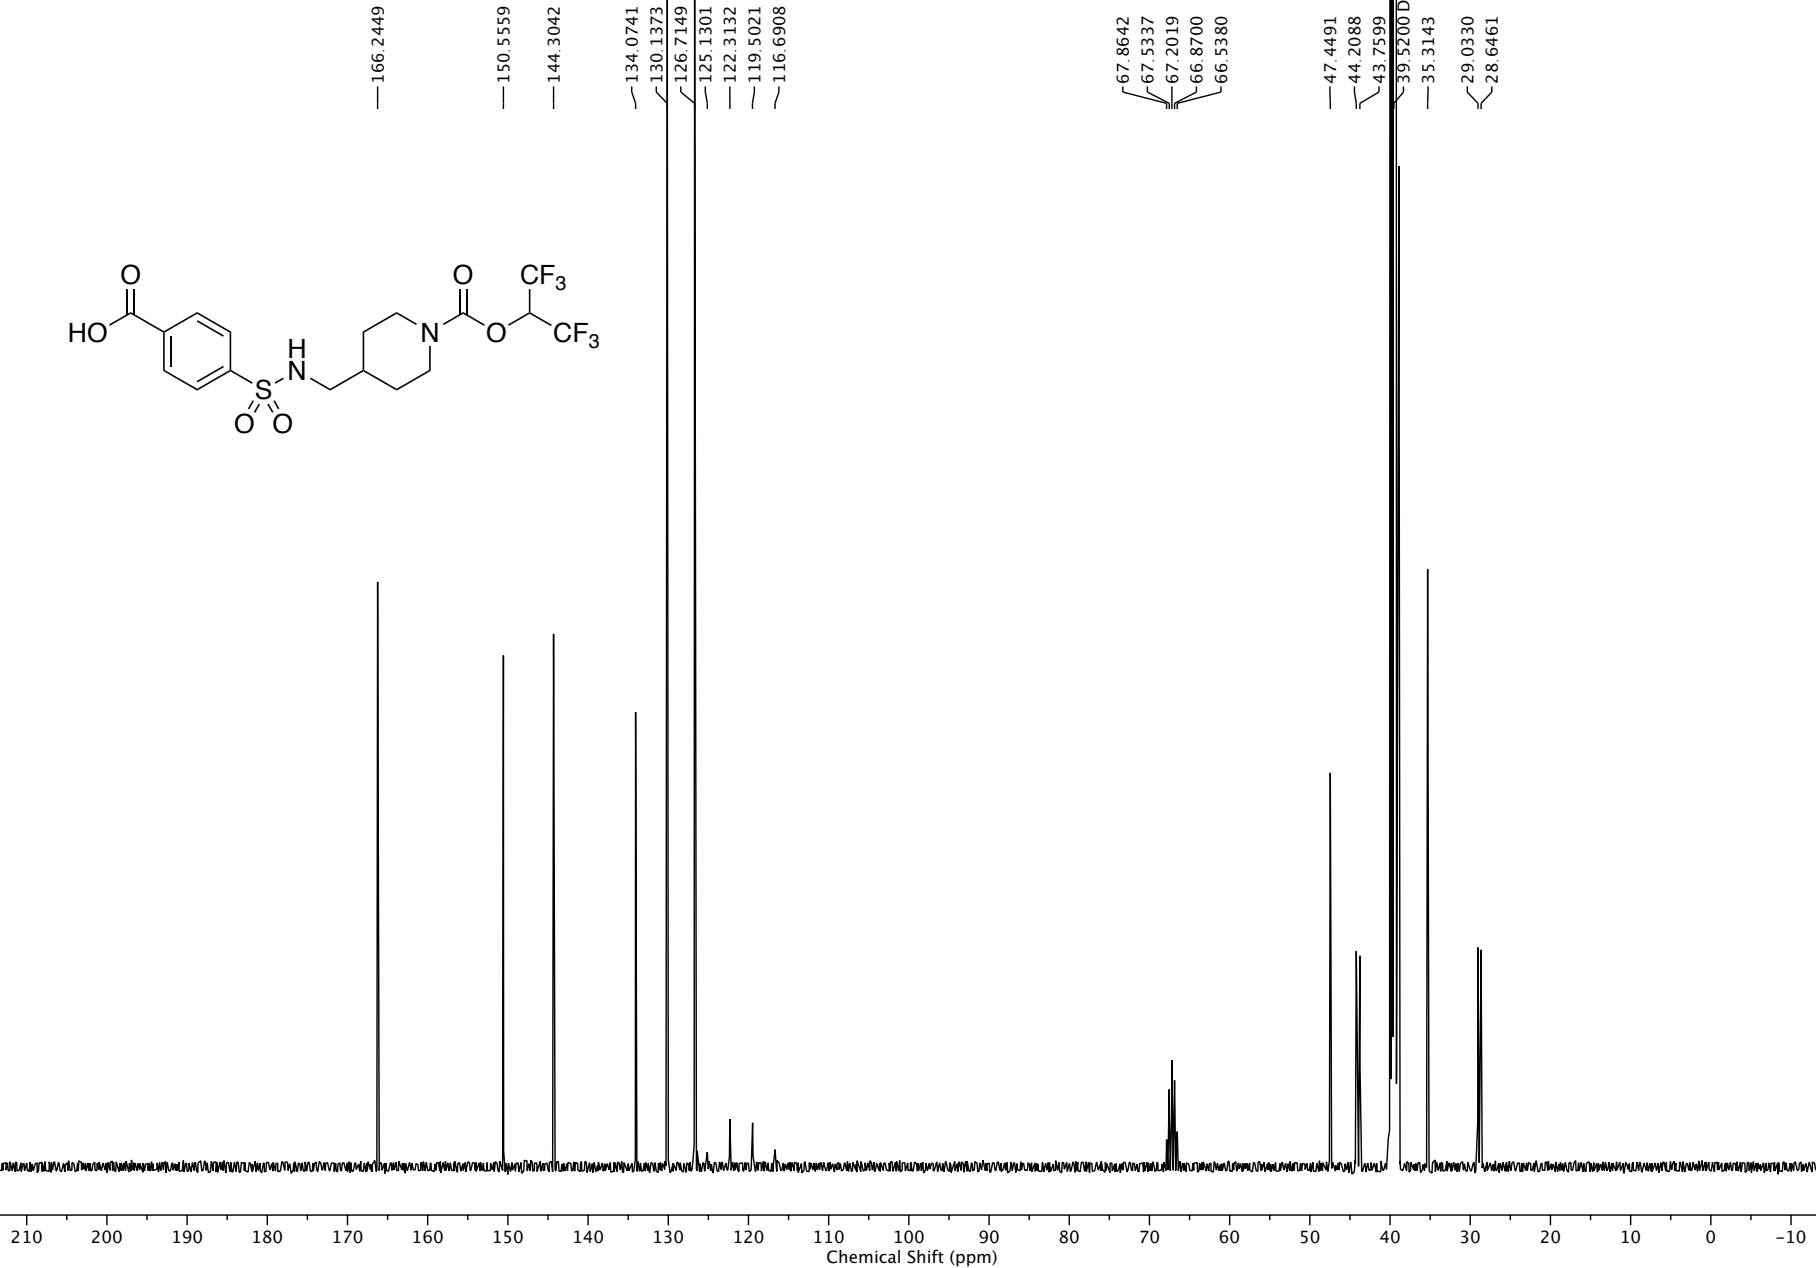

8.2206  
8.1997  
7.9494  
7.9285

5.7754  
5.7601  
5.7445  
5.7289  
5.7133  
5.6978  
5.6819  
4.6441  
4.6290  
4.6219  
4.6051  
4.4954  
4.4803  
4.4393  
4.2013  
4.1636  
4.1274  
2.9140  
2.8934  
2.8775  
2.8604  
2.8219  
2.8166  
2.7908

2.0457  
1.7903  
1.7555  
1.7321  
1.7229  
1.7140  
1.7050  
1.6950  
1.6859  
1.4355  
1.2034  
1.1925  
1.1637  
1.1317  
1.0985  
1.0704

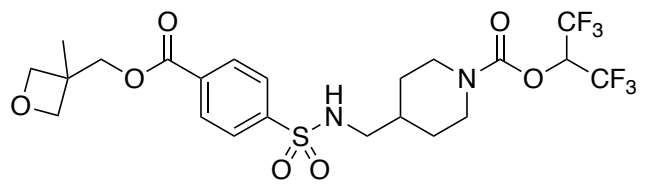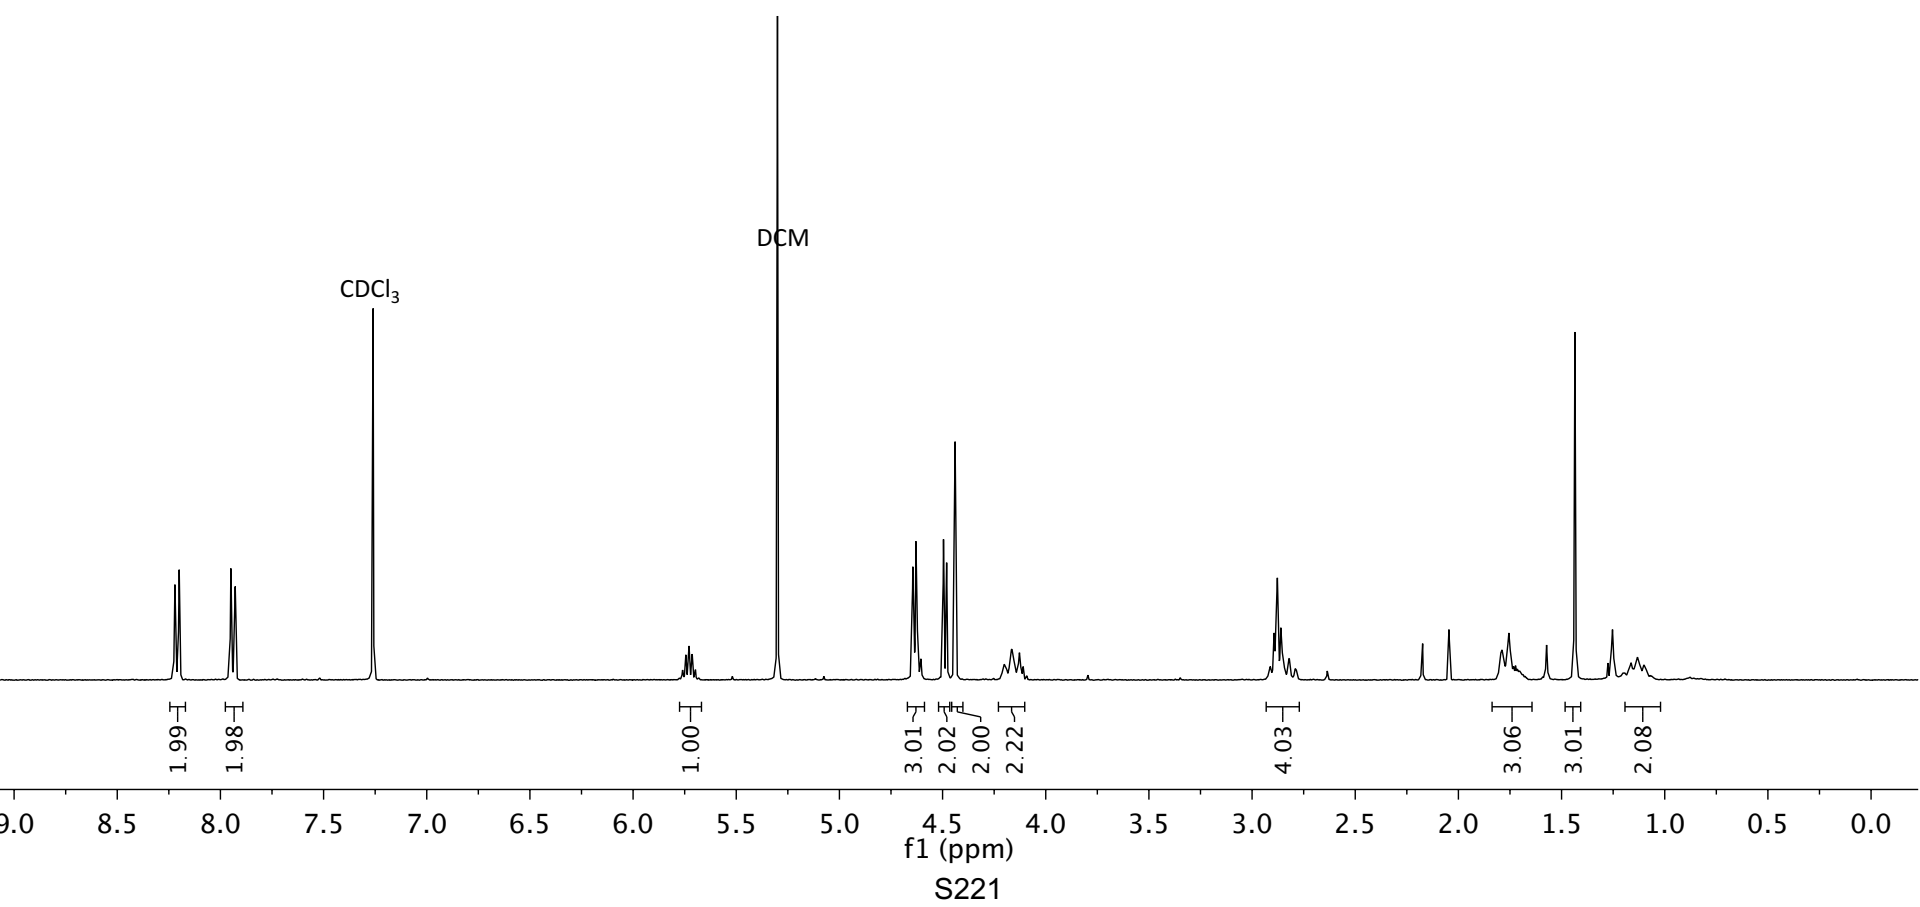

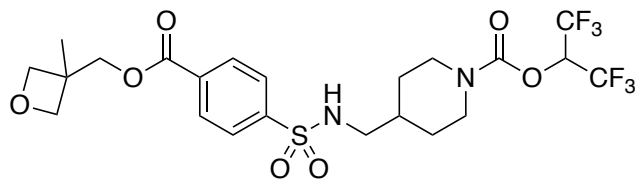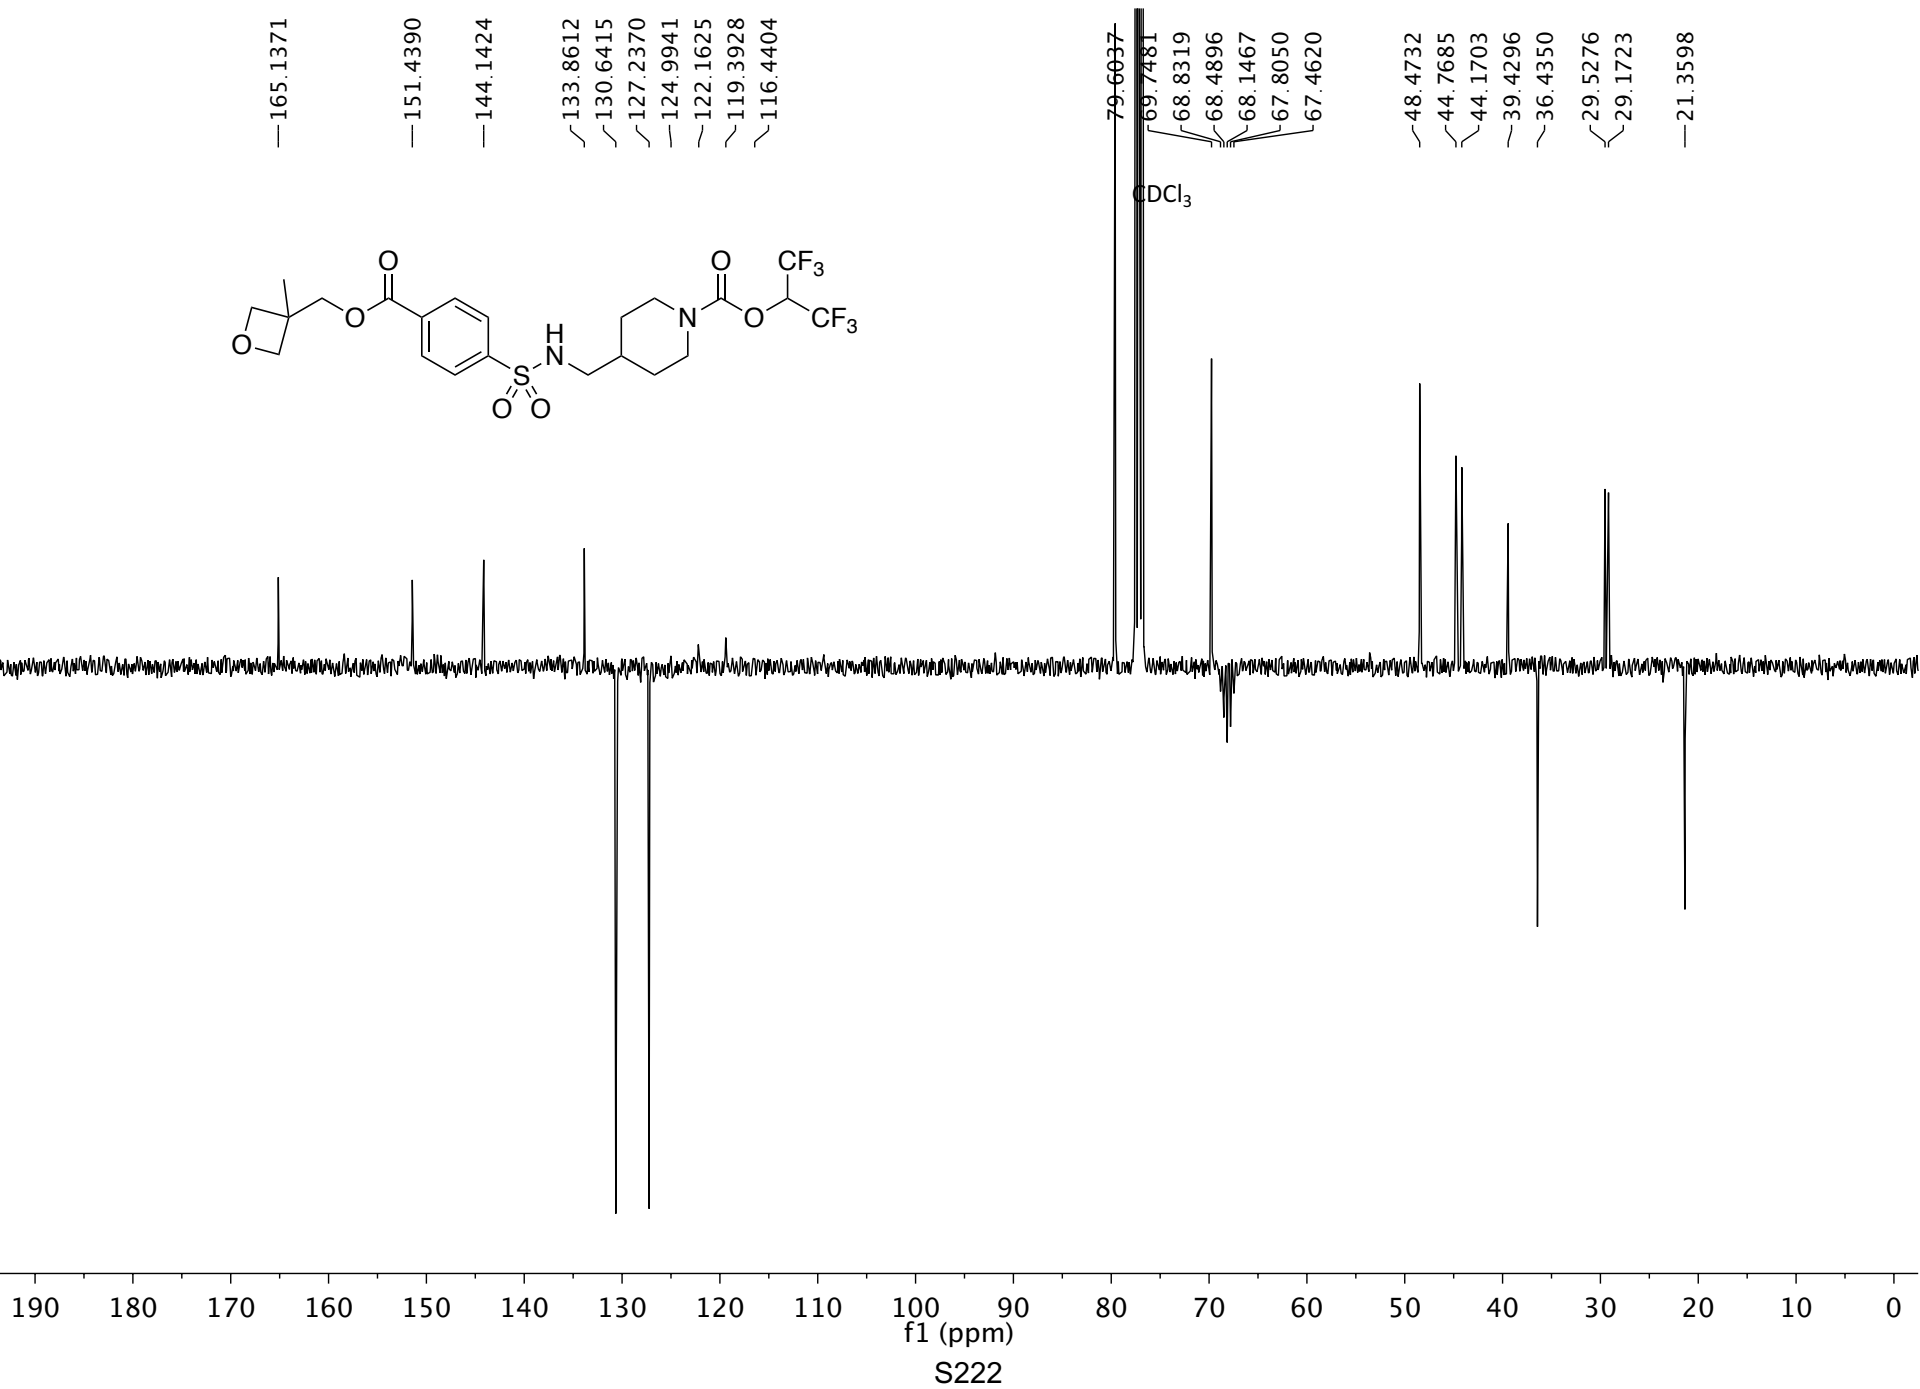

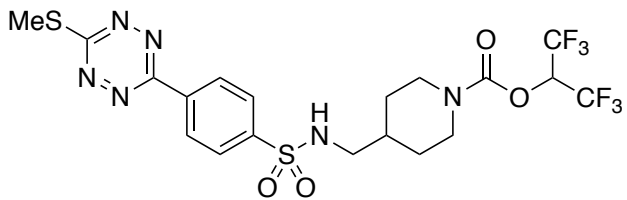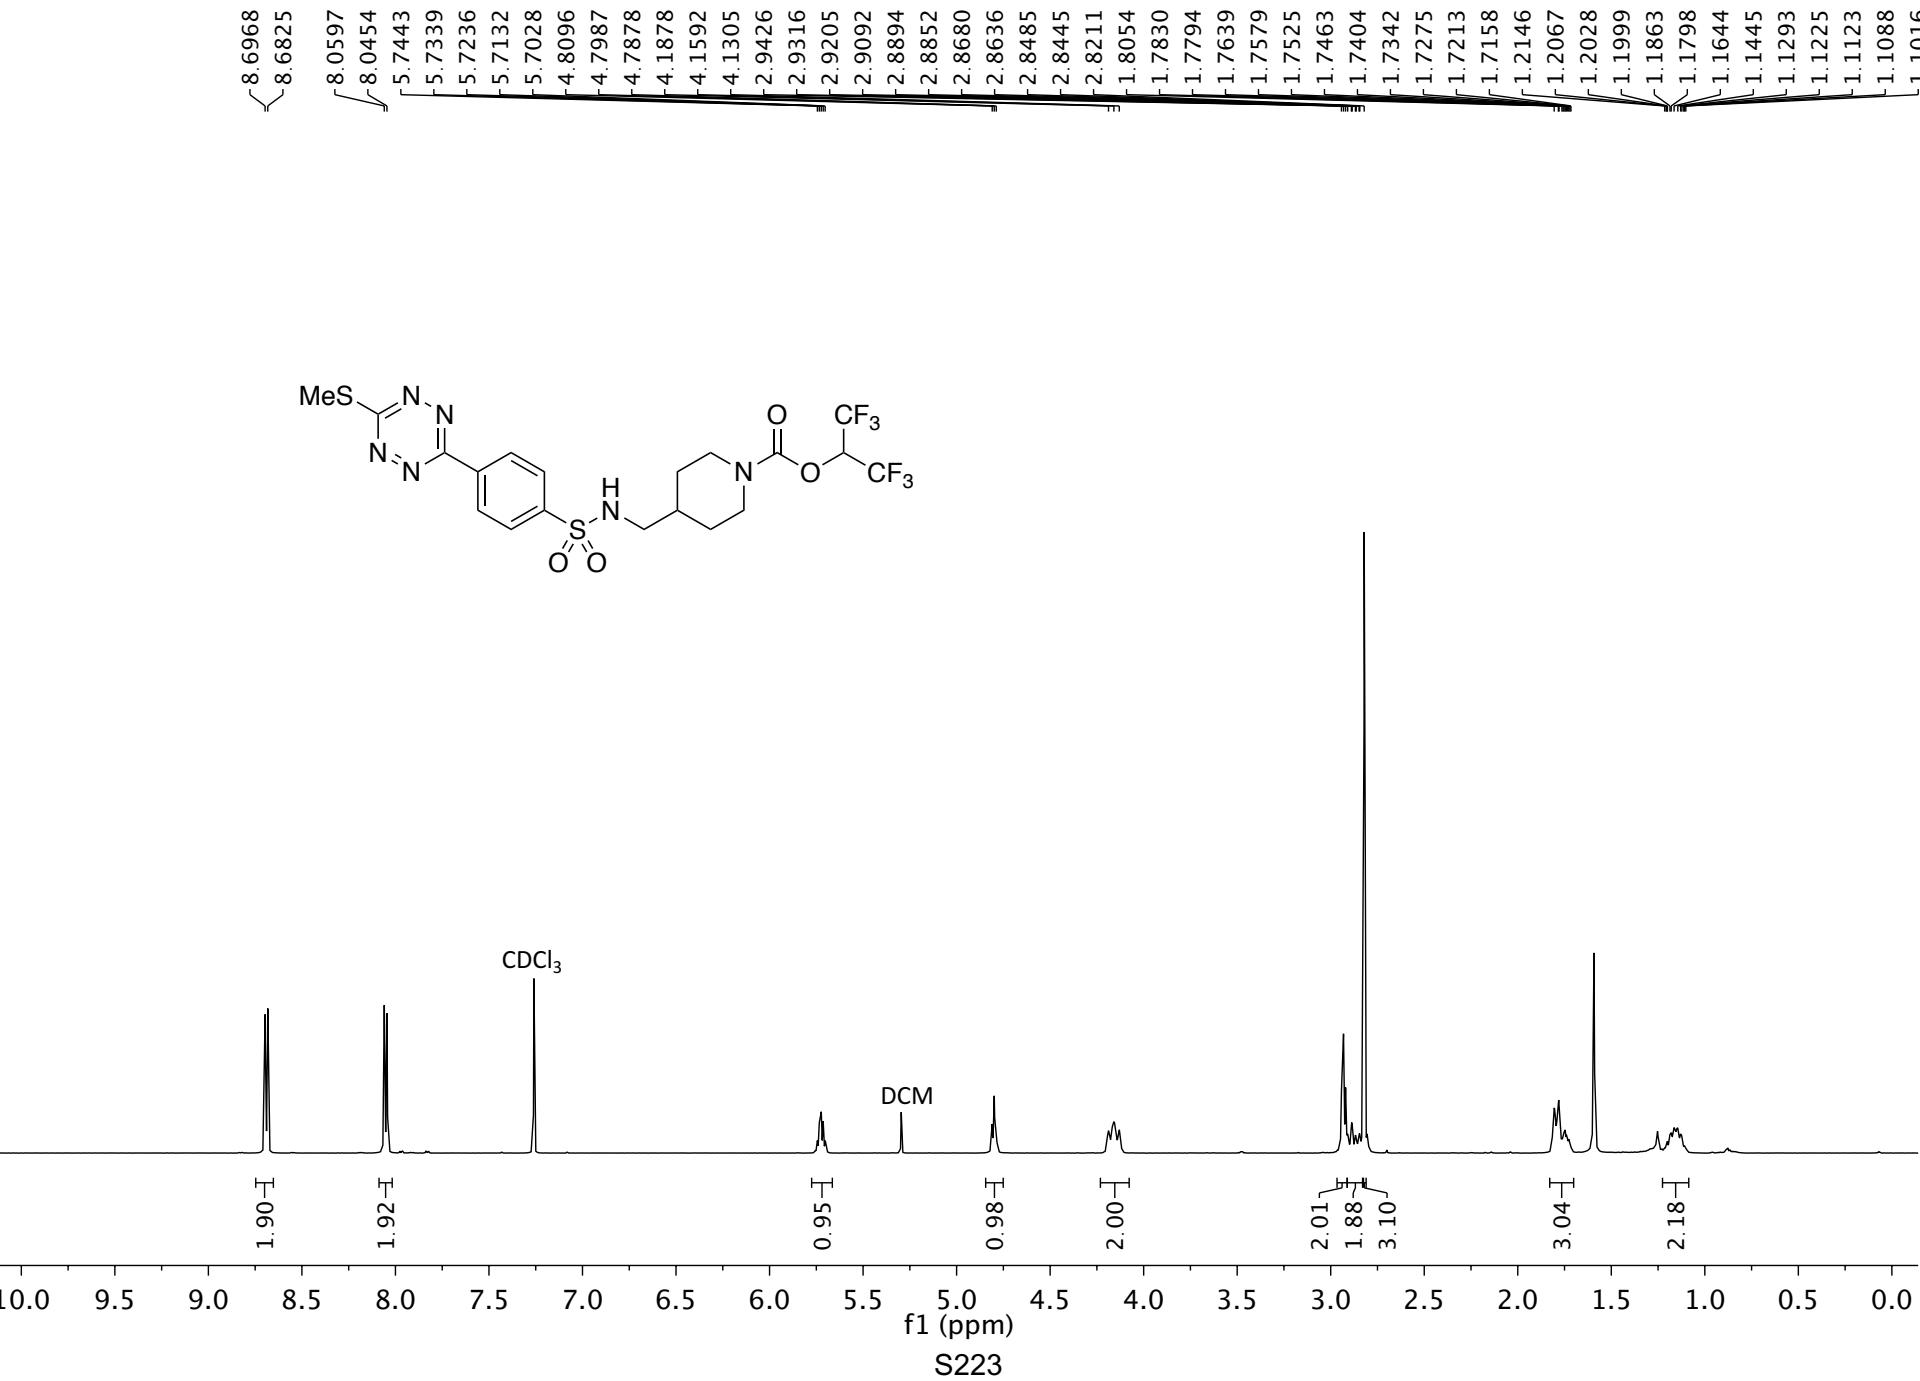

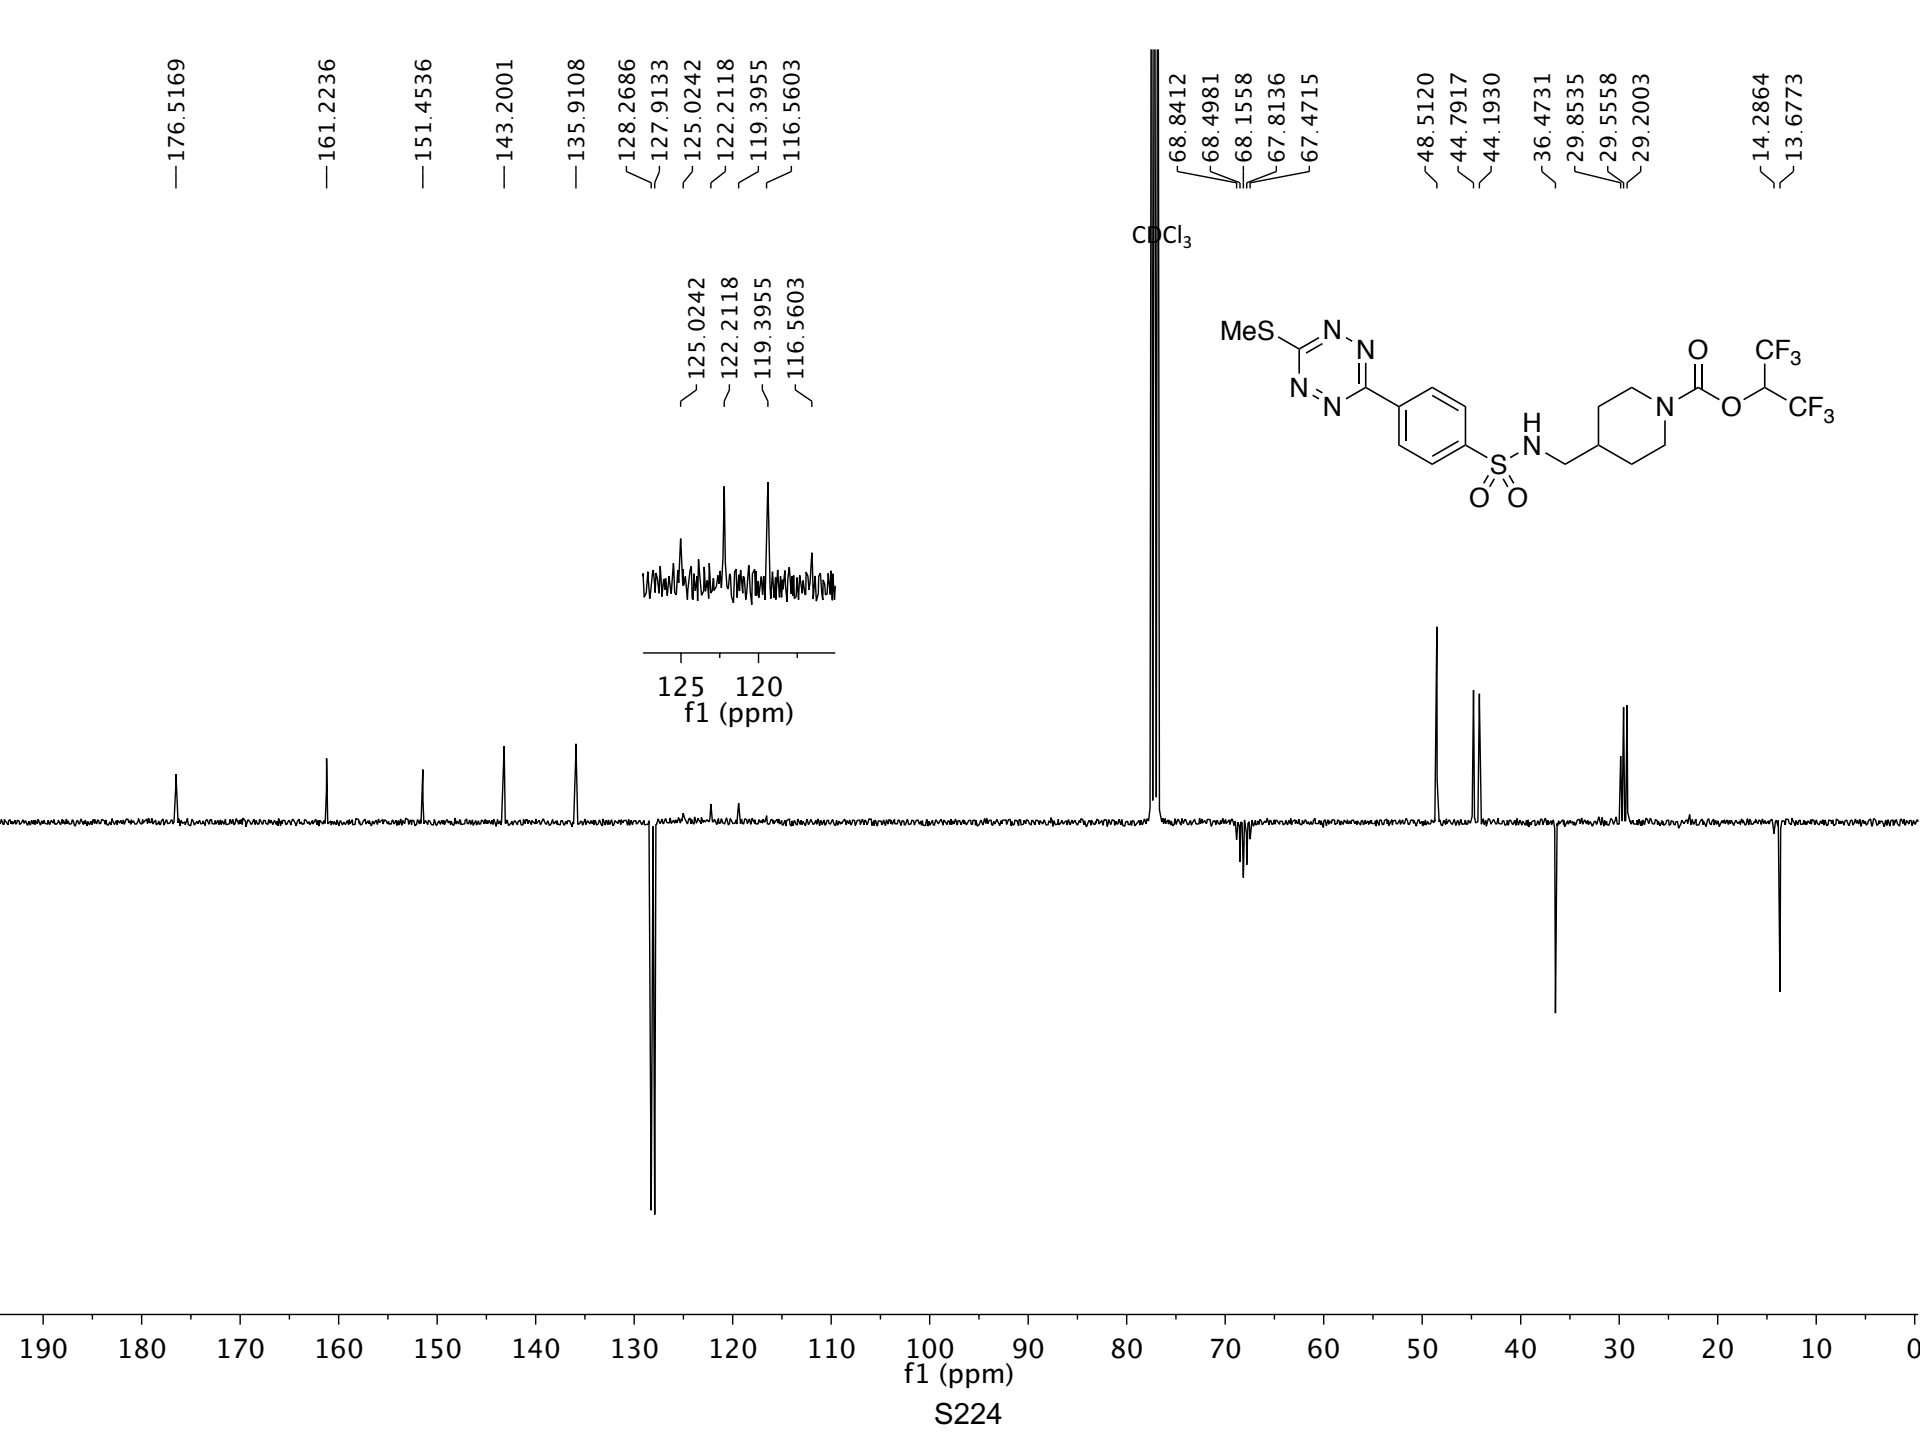



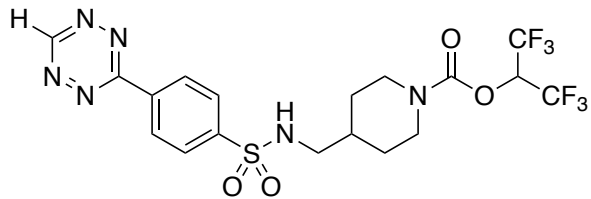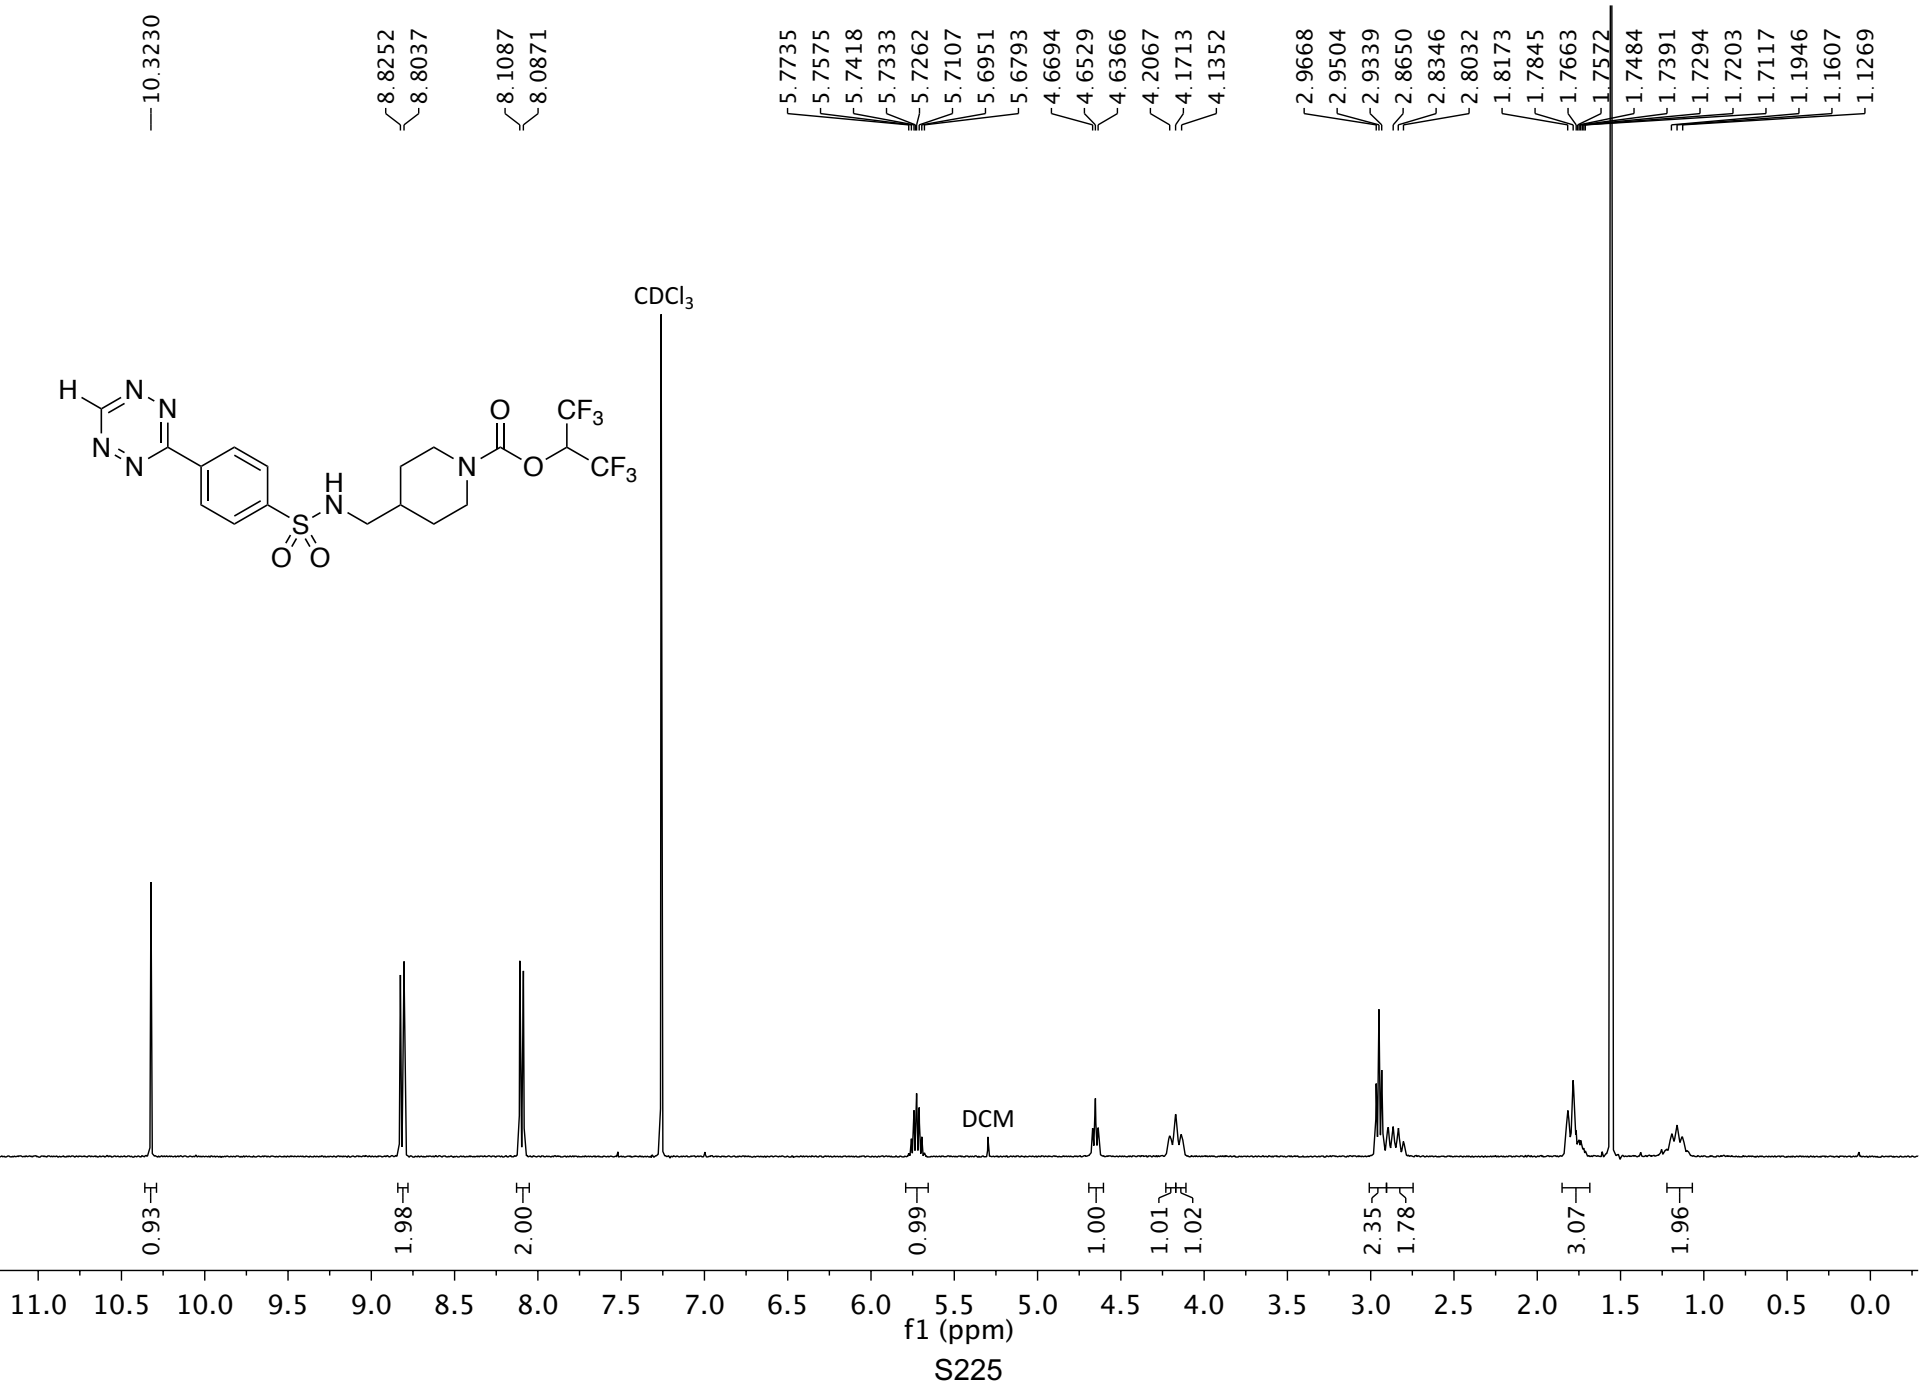

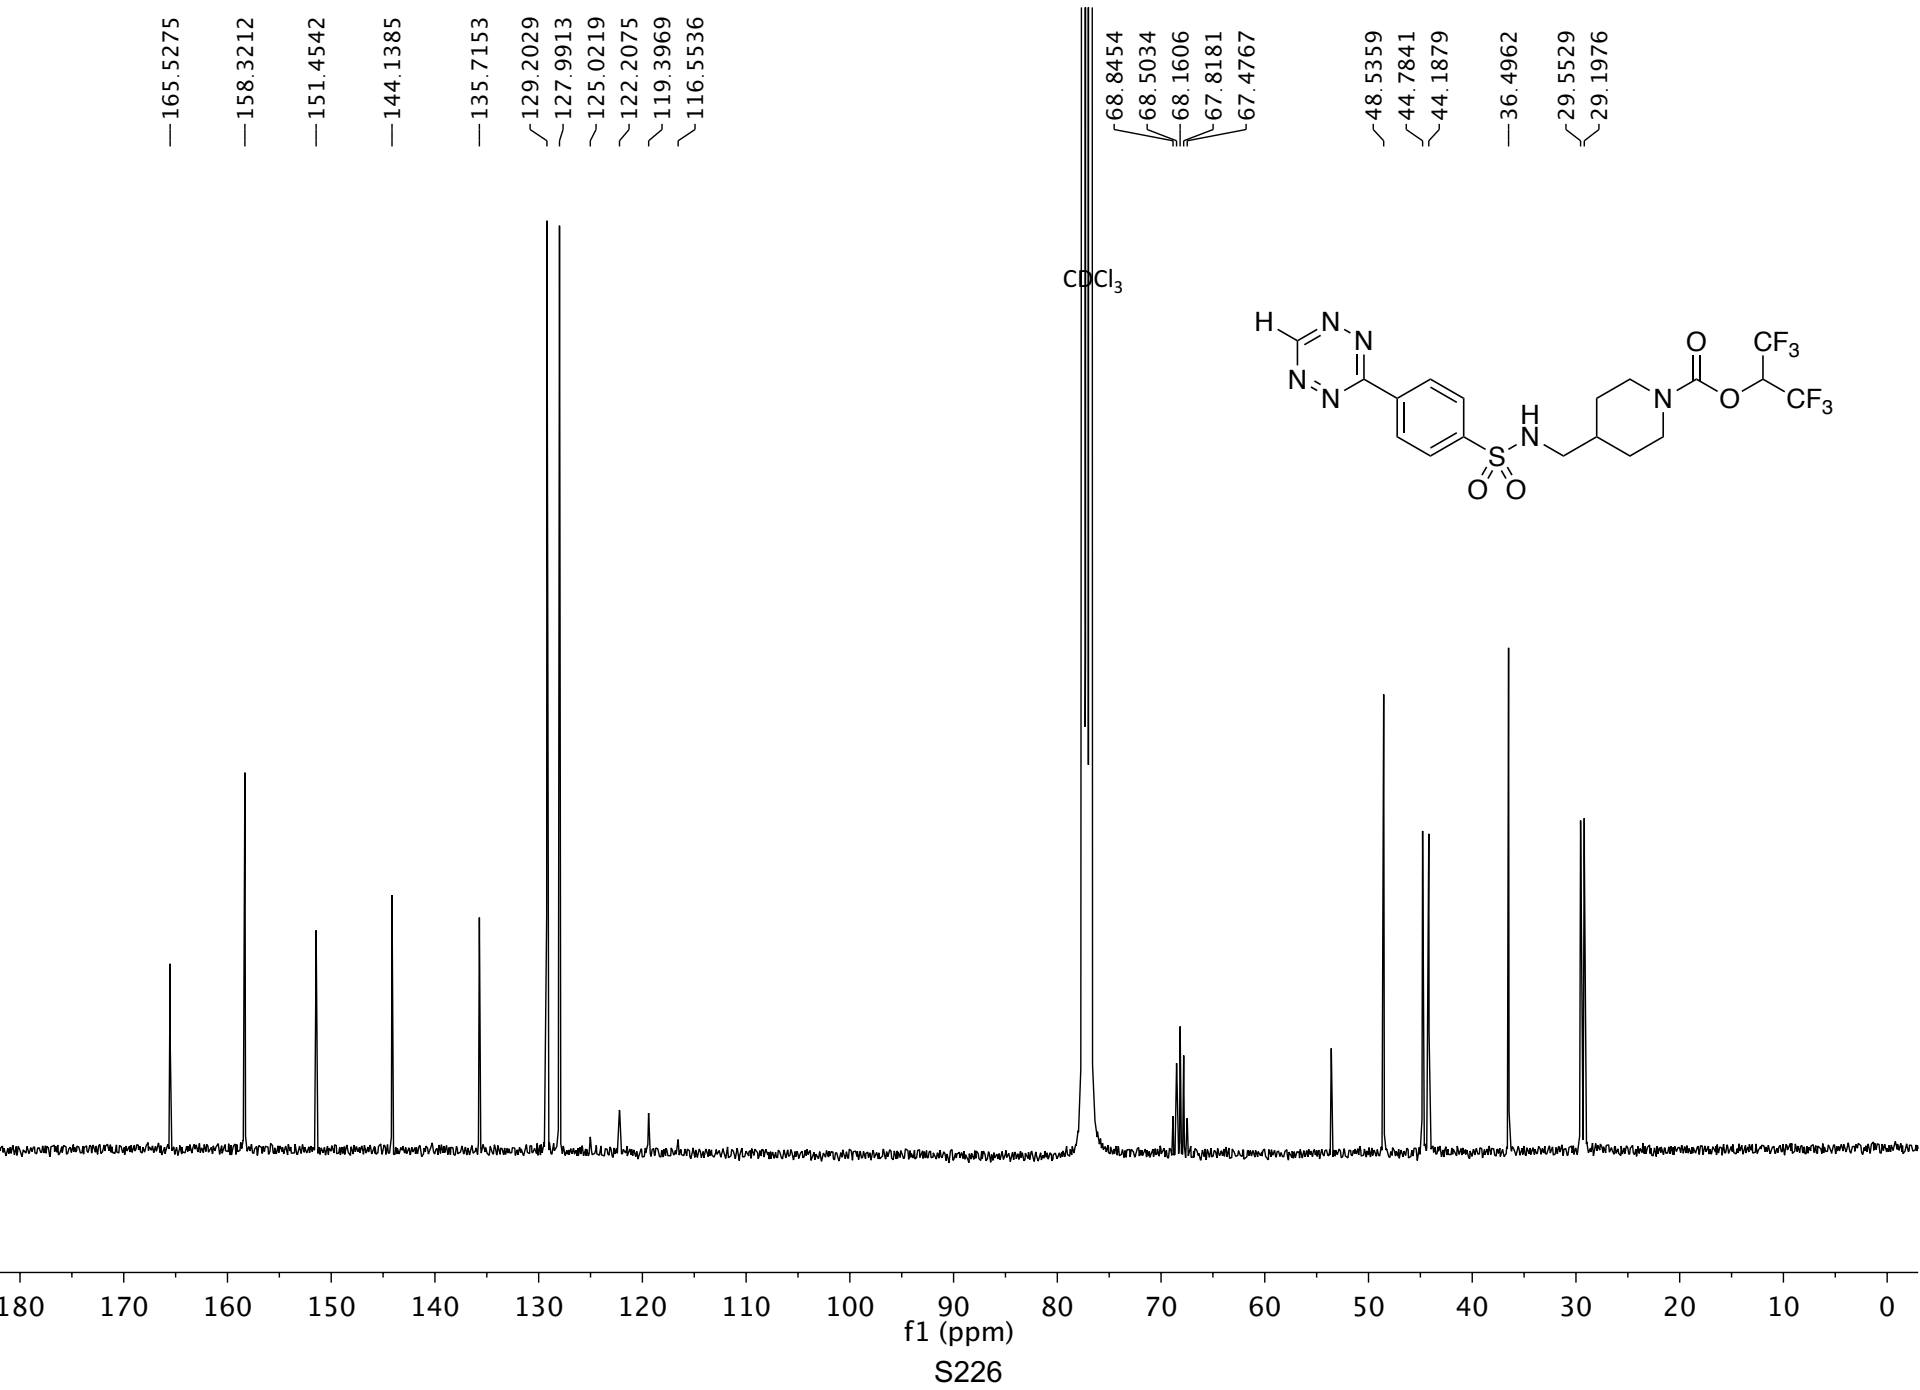

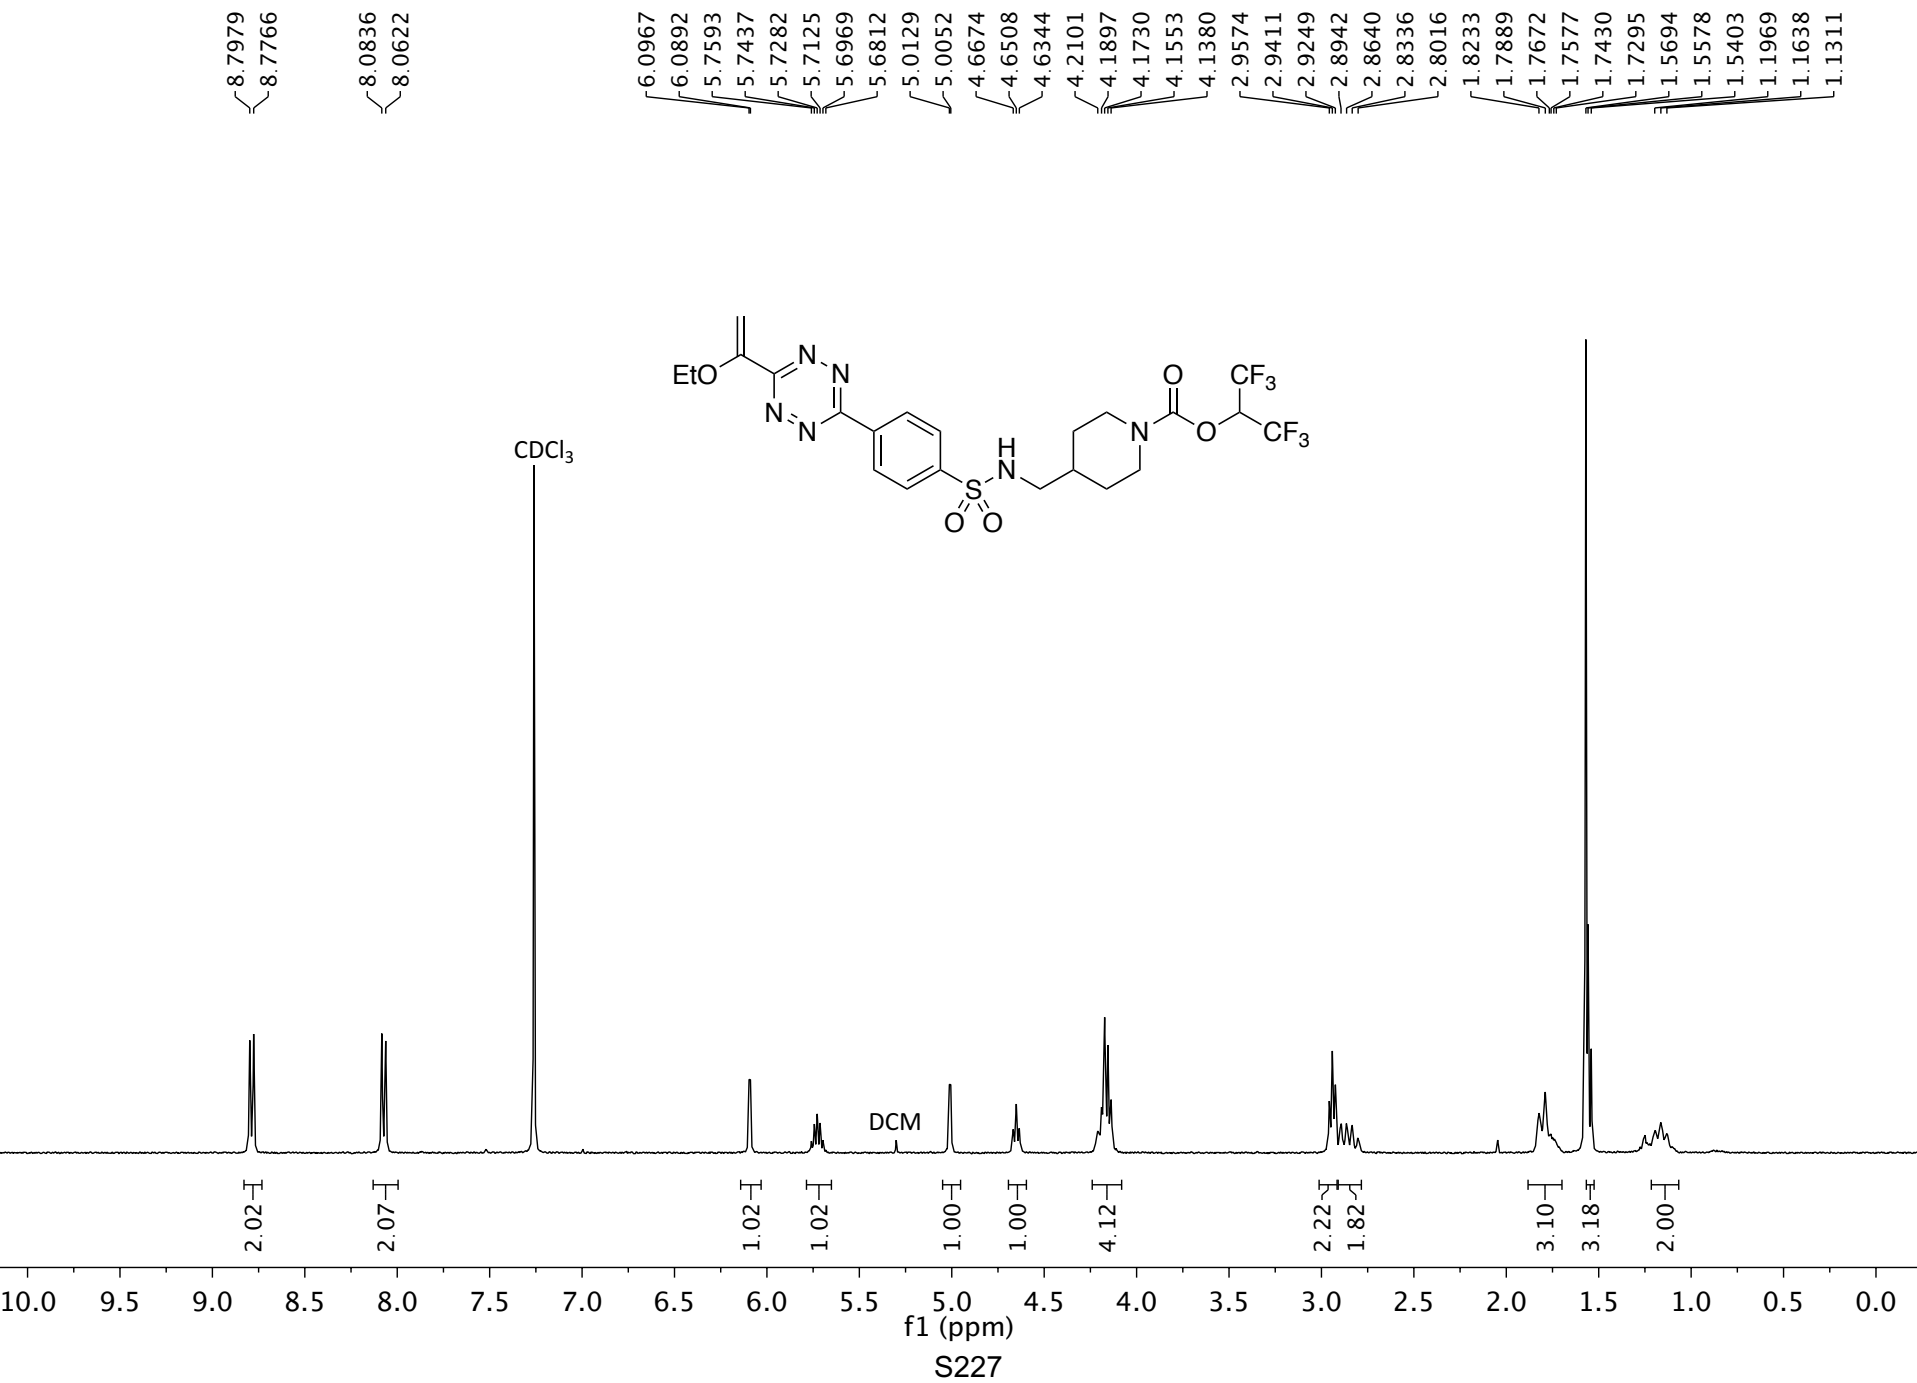

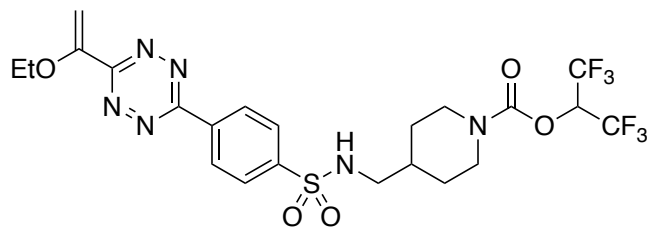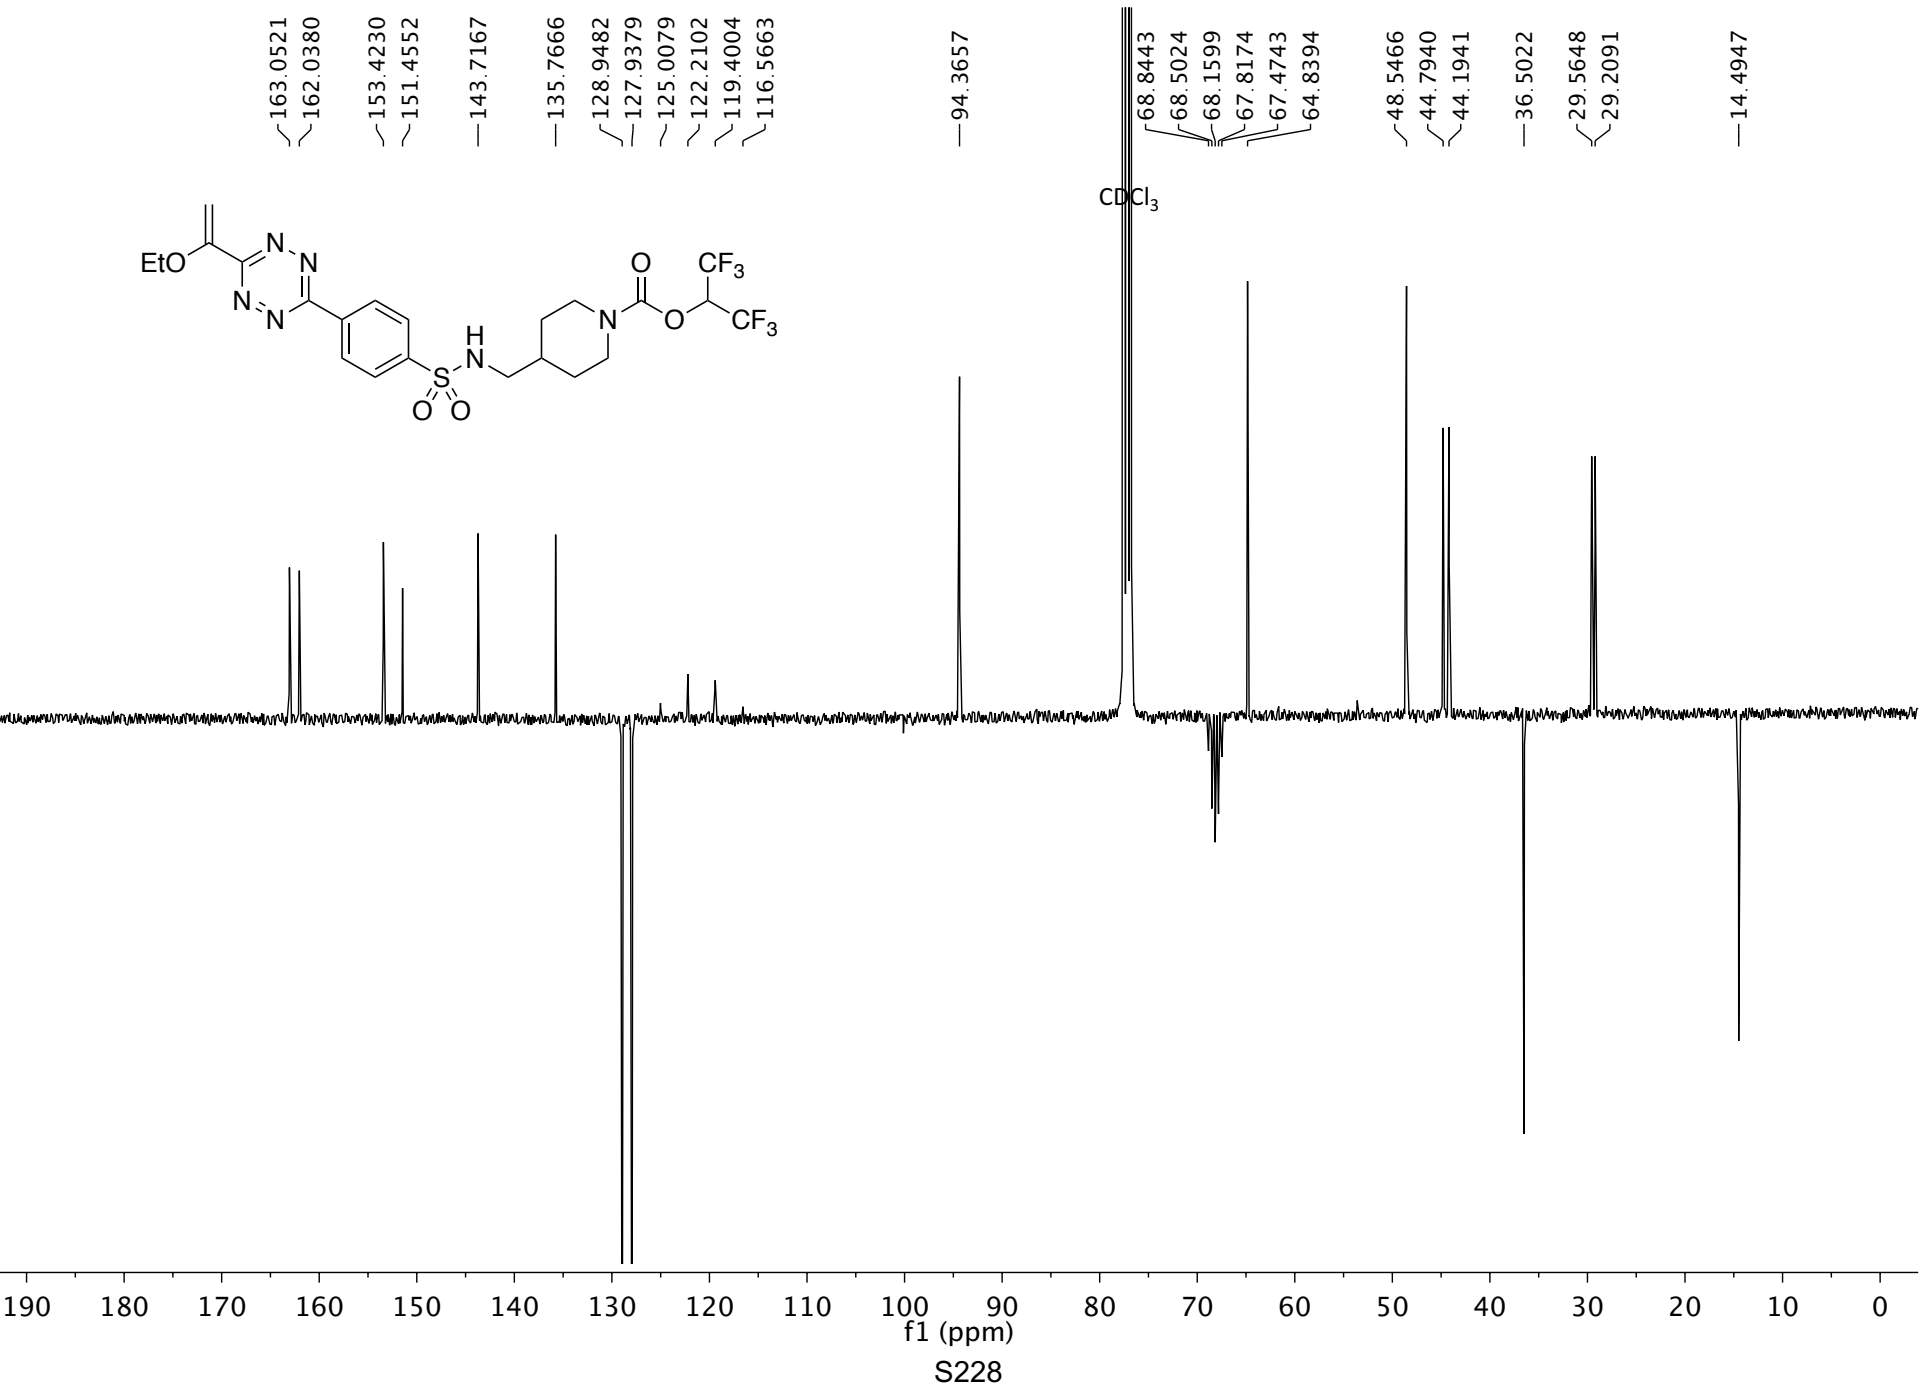

8.7951  
8.7742  
8.6028  
8.0952  
8.0744  
7.6709  
7.6666  
7.6623  
7.2926  
7.2896

5.7592  
5.7442  
5.7285  
5.7129  
5.6973

4.6221  
4.6058  
4.5893  
4.2106  
4.1771  
4.1390

2.9617  
2.9453  
2.9288  
2.8957  
2.8648  
2.8346  
2.8033  
1.8237  
1.7896  
1.7682  
1.7590  
1.7501  
1.7410  
1.7308  
1.1958  
1.1627  
1.1298

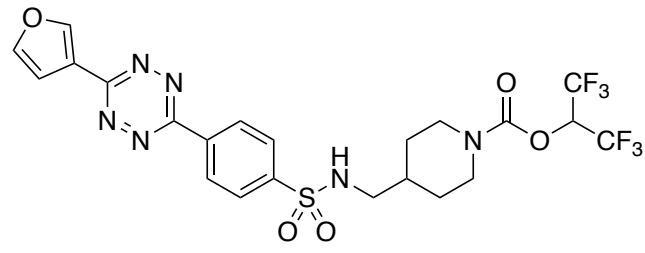

CDCl<sub>3</sub>

DCM

1.98  
0.93

1.98  
0.98

0.99

0.99

1.00

2.04

2.21  
1.85

3.15

2.01

10.0 9.5 9.0 8.5 8.0 7.5 7.0 6.5 6.0 5.5 5.0 4.5 4.0 3.5 3.0 2.5 2.0 1.5 1.0 0.5 0.0

f1 (ppm)

S229

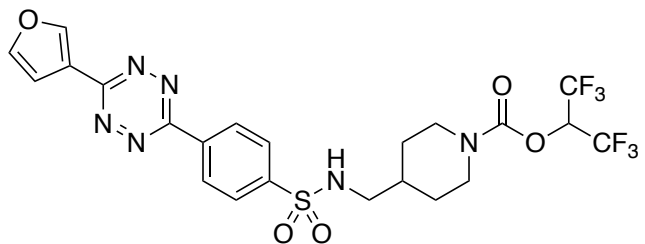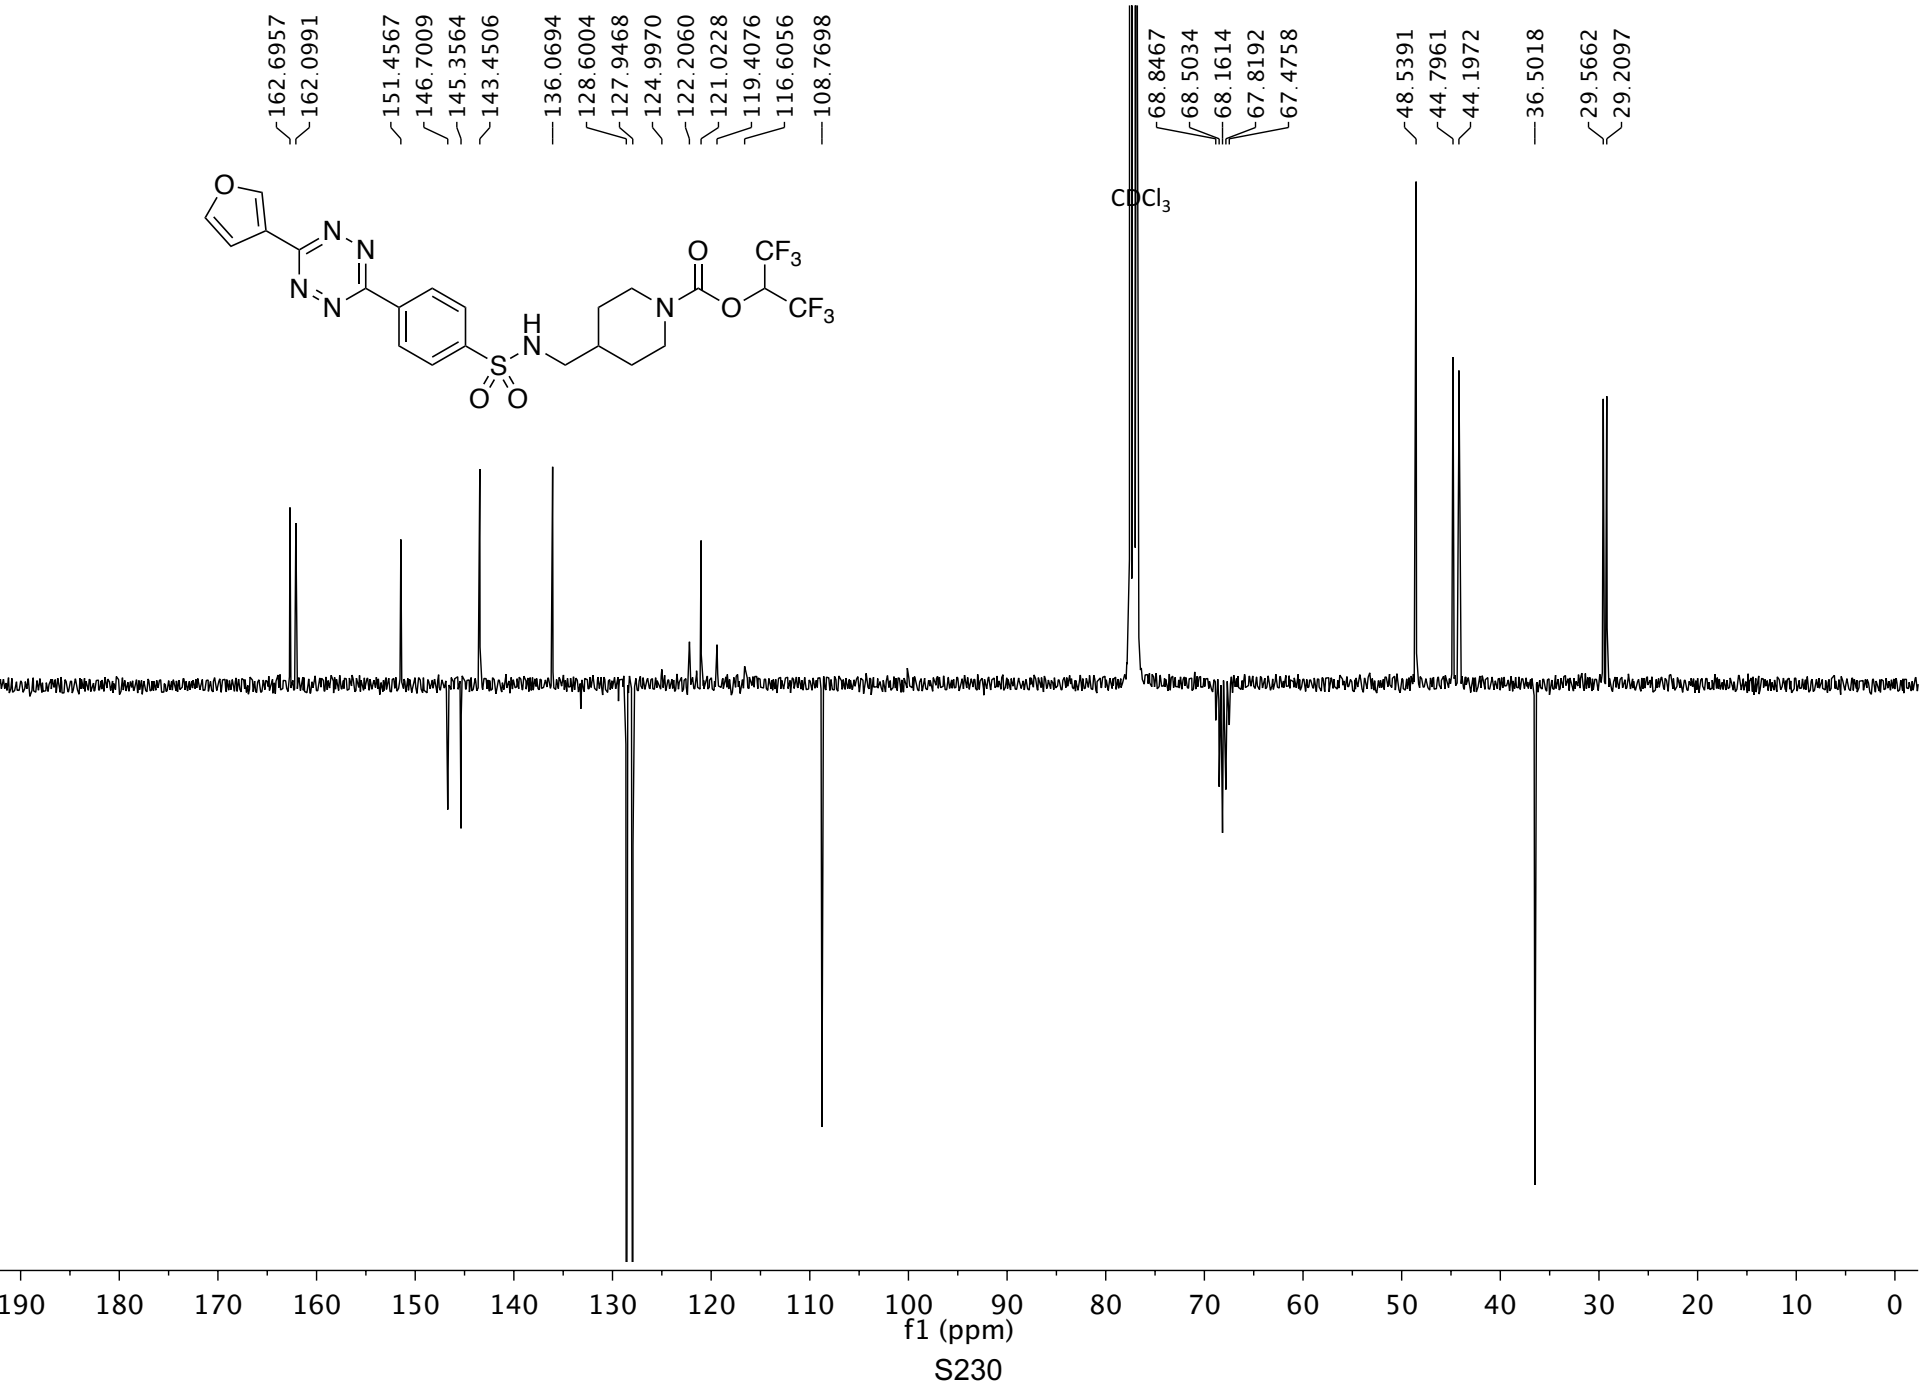

Supplement: NIHMS1635583-supplement-supp_info.pdf [file NIHMS1635583-supplement-supp_info.pdf]
